# Supplementary material for: Single Crystal Structure Analysis of Three Novel Iron(II) Coordination Polymers with Bridging 1,3,5-Tris(1H-1,2,4-triazol-1-yl)methyl)benzene
Source: Preprints.org preprint supplement (doi:10.20944/preprints202309.1826.v1), 2023-09-27
Supplement: Supplementary file 4 [file supplementary]

Archive with 7 entries (7 files):
- Fe(1-tbbt)BF4 H2O.cif
- Fe(1-tbbt)BF4 H2O-checkcif.pdf
- Fe(1-tbbt)ClO4 H2O.cif
- Fe(1-tbbt)ClO4 H2O-checkcif.pdf
- Fe(1-ttmb)(NCS).cif
- Fe(1-ttmb)(NCS)-checkcif.pdf
- Limon-SI-fin.docx
