# Supplementary material for: Single Crystal Structure Analysis of Three Novel Iron(II) Coordination Polymers with Bridging 1,3,5-Tris(1H-1,2,4-triazol-1-yl)methyl)benzene
Source: Preprints.org preprint supplement (doi:10.20944/preprints202309.1826.v1), 2023-09-27
Supplement: Supplementary file 4 [file supplementary › Fe(1-tbbt)BF4 H2O.cif]

data_al_bf5a
_audit_creation_date               2023-09-01
_audit_creation_method
;
Olex2 1.5
(compiled 2023.08.24 svn.re1ec1418 for OlexSys, GUI svn.r6817)
;
_shelx_SHELXL_version_number       '2017/1'
_audit_contact_author_address      ?
_audit_contact_author_email        ?
_audit_contact_author_name         ''
_audit_contact_author_phone        ?
_publ_contact_author_id_orcid      ?
_publ_section_references
;
Dolomanov, O.V., Bourhis, L.J., Gildea, R.J, Howard, J.A.K. & Puschmann, H.
 (2009), J. Appl. Cryst. 42, 339-341.

Sheldrick, G.M. (2008). Acta Cryst. A64, 112-122.

Sheldrick, G.M. (2015). Acta Cryst. A71, 3-8.
;
_chemical_name_common              ?
_chemical_name_systematic          ?
_chemical_formula_moiety           'C30 H34 Fe N18 O2, 4(H2 O), 2(B F4)'
_chemical_formula_sum              'C30 H42 B2 F8 Fe N18 O6'
_chemical_formula_weight           980.28
_chemical_melting_point            ?
loop_
  _atom_type_symbol
  _atom_type_description
  _atom_type_scat_dispersion_real
  _atom_type_scat_dispersion_imag
  _atom_type_scat_source
 'C' 'C' 0.0033 0.0016 'International Tables Vol C Tables 4.2.6.8 and 6.1.1.4'
 'H' 'H' 0.0000 0.0000 'International Tables Vol C Tables 4.2.6.8 and 6.1.1.4'
 'B' 'B' 0.0013 0.0007 'International Tables Vol C Tables 4.2.6.8 and 6.1.1.4'
 'F' 'F' 0.0171 0.0103 'International Tables Vol C Tables 4.2.6.8 and 6.1.1.4'
 'Fe' 'Fe' 0.3463 0.8444 'International Tables Vol C Tables 4.2.6.8 and 6.1.1.4'
 'N' 'N' 0.0061 0.0033 'International Tables Vol C Tables 4.2.6.8 and 6.1.1.4'
 'O' 'O' 0.0106 0.0060 'International Tables Vol C Tables 4.2.6.8 and 6.1.1.4'

_shelx_space_group_comment
;
The symmetry employed for this shelxl refinement is uniquely defined
by the following loop, which should always be used as a source of
symmetry information in preference to the above space-group names.
They are only intended as comments.
;
_space_group_crystal_system        'monoclinic'
_space_group_IT_number             14
_space_group_name_H-M_alt          'P 1 21/n 1'
_space_group_name_Hall             '-P 2yn'
loop_
  _space_group_symop_operation_xyz
 'x, y, z'
 '-x+1/2, y+1/2, -z+1/2'
 '-x, -y, -z'
 'x-1/2, -y-1/2, z-1/2'

_cell_length_a                     8.9379(8)
_cell_length_b                     17.9291(16)
_cell_length_c                     13.4514(13)
_cell_angle_alpha                  90
_cell_angle_beta                   91.562(4)
_cell_angle_gamma                  90
_cell_volume                       2154.8(3)
_cell_formula_units_Z              2
_cell_measurement_reflns_used      8136
_cell_measurement_temperature      273(2)
_cell_measurement_theta_max        27.50
_cell_measurement_theta_min        2.27
_shelx_estimated_absorpt_T_max     0.916
_shelx_estimated_absorpt_T_min     0.807
_exptl_absorpt_coefficient_mu      0.449
_exptl_absorpt_correction_T_max    ?
_exptl_absorpt_correction_T_min    ?
_exptl_absorpt_correction_type     none
_exptl_absorpt_process_details     ?
_exptl_absorpt_special_details     ?
_exptl_crystal_colour              'clear colourless'
_exptl_crystal_colour_lustre       clear
_exptl_crystal_colour_primary      colourless
_exptl_crystal_density_diffrn      1.511
_exptl_crystal_density_meas        ?
_exptl_crystal_density_method      'not measured'
_exptl_crystal_description         block
_exptl_crystal_F_000               1008
_exptl_crystal_preparation         ?
_exptl_crystal_size_max            0.5
_exptl_crystal_size_mid            0.2
_exptl_crystal_size_min            0.2
_exptl_transmission_factor_max     ?
_exptl_transmission_factor_min     ?
_diffrn_reflns_av_R_equivalents    0.0242
_diffrn_reflns_av_unetI/netI       0.0269
_diffrn_reflns_Laue_measured_fraction_full  0.990
_diffrn_reflns_Laue_measured_fraction_max  0.992
_diffrn_reflns_limit_h_max         8
_diffrn_reflns_limit_h_min         -11
_diffrn_reflns_limit_k_max         23
_diffrn_reflns_limit_k_min         -20
_diffrn_reflns_limit_l_max         17
_diffrn_reflns_limit_l_min         -16
_diffrn_reflns_number              15411
_diffrn_reflns_point_group_measured_fraction_full  0.990
_diffrn_reflns_point_group_measured_fraction_max  0.992
_diffrn_reflns_theta_full          25.242
_diffrn_reflns_theta_max           27.524
_diffrn_reflns_theta_min           1.893
_diffrn_ambient_temperature        273.15
_diffrn_detector_area_resol_mean   ?
_diffrn_measured_fraction_theta_full  0.990
_diffrn_measured_fraction_theta_max  0.992
_diffrn_measurement_device_type    'Bruker APEX-II CCD'
_diffrn_measurement_method         '\f and \w scans'
_diffrn_radiation_type             MoK\a
_diffrn_radiation_wavelength       0.71073
_diffrn_source                     ?
_diffrn_source_current             1.0
_diffrn_source_power               0.05
_diffrn_source_voltage             50.0
_diffrn_standards_number           0
_reflns_Friedel_coverage           0.000
_reflns_Friedel_fraction_full      .
_reflns_Friedel_fraction_max       .
_reflns_number_gt                  4082
_reflns_number_total               4915
_reflns_special_details
;
 Reflections were merged by SHELXL according to the crystal
 class for the calculation of statistics and refinement.
 
 _reflns_Friedel_fraction is defined as the number of unique
 Friedel pairs measured divided by the number that would be
 possible theoretically, ignoring centric projections and
 systematic absences.
;
_reflns_threshold_expression       'I > 2\s(I)'
_computing_cell_refinement         ?
_computing_data_collection         ?
_computing_data_reduction          ?
_computing_molecular_graphics      'Olex2 1.5 (Dolomanov et al., 2009)'
_computing_publication_material    'Olex2 1.5 (Dolomanov et al., 2009)'
_computing_structure_refinement    'XL  (Sheldrick, 2008)'
_computing_structure_solution      'SHELXT 2014/5 (Sheldrick, 2014)'
_refine_diff_density_max           0.448
_refine_diff_density_min           -0.355
_refine_diff_density_rms           0.059
_refine_ls_extinction_coef         .
_refine_ls_extinction_method       none
_refine_ls_goodness_of_fit_ref     1.055
_refine_ls_hydrogen_treatment      constr
_refine_ls_matrix_type             full
_refine_ls_number_parameters       341
_refine_ls_number_reflns           4915
_refine_ls_number_restraints       6
_refine_ls_R_factor_all            0.0530
_refine_ls_R_factor_gt             0.0435
_refine_ls_restrained_S_all        1.057
_refine_ls_shift/su_max            0.000
_refine_ls_shift/su_mean           0.000
_refine_ls_structure_factor_coef   Fsqd
_refine_ls_weighting_details      
 'w=1/[\s^2^(Fo^2^)+(0.0811P)^2^+0.7622P] where P=(Fo^2^+2Fc^2^)/3'
_refine_ls_weighting_scheme        calc
_refine_ls_wR_factor_gt            0.1290
_refine_ls_wR_factor_ref           0.1381
_refine_special_details
;
Refinement of F^2^ against ALL reflections. The weighted R-factor wR and
 goodness of fit S are based on F^2^, conventional R-factors R are based
 on F, with F set to zero for negative F^2^. The threshold expression of
 F^2^ > 2sigma(F^2^) is used only for calculating R-factors(gt) etc. and is
 not relevant to the choice of reflections for refinement.  R-factors based
 on F^2^ are statistically about twice as large as those based on F, and R-
 factors based on ALL data will be even larger.
;
_olex2_refinement_description
;
1. Fixed Uiso
 At 1.2 times of:
  All C(H) groups, All C(H,H) groups
 At 1.5 times of:
  All O(H,H) groups
2. Restrained distances
 H1A-H2B
 2.2 with sigma of 0.01
 Fe1-H1A \\sim Fe1-H1B
 with sigma of 0.02
 F2B-B1 \\sim F4A-B1
 with sigma of 0.02
 F4B-B1 \\sim F1A-B1
 with sigma of 0.02
 B1-F3B \\sim B1-F3A
 with sigma of 0.02
 B1-F1B \\sim B1-F2A
 with sigma of 0.02
3. Others
 Sof(F1A)=Sof(F2A)=Sof(F3A)=Sof(F4A)=1-FVAR(1)
 Sof(F1B)=Sof(F2B)=Sof(F3B)=Sof(F4B)=FVAR(1)
4.a Free rotating group:
 O1(H1A,H1B), O2(H2A,H2B), O3(H3C,H3D)
4.b Secondary CH2 refined with riding coordinates:
 C3(H3A,H3B), C10(H10A,H10B), C13(H13A,H13B)
4.c Aromatic/amide H refined with riding coordinates:
 C1(H1), C2(H2), C5(H5), C7(H7), C9(H9), C11(H11), C12(H12), C14(H14), C15(H15)
;
_atom_sites_solution_hydrogens     mixed
_atom_sites_solution_primary       dual
_atom_sites_solution_secondary     ?
_atom_sites_special_details
;
The structure was solved using Patterson Methods, followed by a Tangent Expansion (ShelXS). RE = 0.3, Nqual =  -1, Ralpha = 0.128
;
loop_
  _atom_site_label
  _atom_site_type_symbol
  _atom_site_fract_x
  _atom_site_fract_y
  _atom_site_fract_z
  _atom_site_U_iso_or_equiv
  _atom_site_adp_type
  _atom_site_occupancy
  _atom_site_site_symmetry_order
  _atom_site_calc_flag
  _atom_site_refinement_flags_posn
  _atom_site_refinement_flags_adp
  _atom_site_refinement_flags_occupancy
  _atom_site_disorder_assembly
  _atom_site_disorder_group
 Fe1 Fe 1.000000 0.500000 1.000000 0.02673(13) Uani 1 2 d DS . P . .
 O1 O 0.92576(17) 0.39453(8) 0.95774(11) 0.0411(3) Uani 1 1 d G . . . .
 H1A H 0.868802 0.385972 0.907398 0.062 Uiso 1 1 d DG U . . .
 H1B H 0.977579 0.355062 0.964756 0.062 Uiso 1 1 d DG U . . .
 N1 N 0.91035(18) 0.55364(9) 0.86441(11) 0.0314(3) Uani 1 1 d . . . . .
 N2 N 0.77481(17) 0.59510(9) 0.74004(11) 0.0322(3) Uani 1 1 d . . . . .
 N3 N 0.91432(19) 0.62270(9) 0.72533(12) 0.0365(4) Uani 1 1 d . . . . .
 N4 N 0.7587(2) 0.32185(9) 0.51150(13) 0.0402(4) Uani 1 1 d . . . . .
 N5 N 0.7080(2) 0.31458(10) 0.60461(13) 0.0470(5) Uani 1 1 d . . . . .
 N6 N 0.6045(3) 0.22860(11) 0.50444(18) 0.0571(5) Uani 1 1 d . . . . .
 N7 N 0.65775(18) 0.55612(10) 0.20675(11) 0.0357(4) Uani 1 1 d . . . . .
 N8 N 0.5801(2) 0.49951(11) 0.16227(16) 0.0500(5) Uani 1 1 d . . . . .
 N9 N 0.79397(18) 0.52065(10) 0.08404(12) 0.0340(4) Uani 1 1 d . . . . .
 C1 C 0.9908(2) 0.59670(11) 0.80212(14) 0.0345(4) Uani 1 1 d . . . . .
 H1 H 1.091960 0.606851 0.813170 0.041 Uiso 1 1 calc R U . . .
 C2 C 0.7748(2) 0.55451(11) 0.82221(13) 0.0332(4) Uani 1 1 d . . . . .
 H2 H 0.691641 0.530151 0.846732 0.040 Uiso 1 1 calc R U . . .
 C3 C 0.6552(2) 0.60532(12) 0.66535(14) 0.0387(4) Uani 1 1 d . . . . .
 H3A H 0.644166 0.658043 0.650713 0.046 Uiso 1 1 calc R U . . .
 H3B H 0.561664 0.587623 0.691601 0.046 Uiso 1 1 calc R U . . .
 C4 C 0.6875(2) 0.56356(11) 0.57033(13) 0.0315(4) Uani 1 1 d . . . . .
 C5 C 0.7611(2) 0.49537(11) 0.57249(15) 0.0357(4) Uani 1 1 d . . . . .
 H5 H 0.795133 0.475533 0.632858 0.043 Uiso 1 1 calc R U . . .
 C6 C 0.7840(2) 0.45672(11) 0.48482(15) 0.0344(4) Uani 1 1 d . . . . .
 C7 C 0.7336(2) 0.48677(11) 0.39469(15) 0.0360(4) Uani 1 1 d . . . . .
 H7 H 0.748219 0.460613 0.336046 0.043 Uiso 1 1 calc R U . . .
 C8 C 0.6616(2) 0.55537(11) 0.39127(13) 0.0327(4) Uani 1 1 d . . . . .
 C9 C 0.6395(2) 0.59333(11) 0.48003(14) 0.0323(4) Uani 1 1 d . . . . .
 H9 H 0.591808 0.639432 0.478590 0.039 Uiso 1 1 calc R U . . .
 C10 C 0.8622(3) 0.38197(12) 0.48756(18) 0.0444(5) Uani 1 1 d . . . . .
 H10A H 0.905145 0.372251 0.423386 0.053 Uiso 1 1 calc R U . . .
 H10B H 0.943208 0.383271 0.537023 0.053 Uiso 1 1 calc R U . . .
 C11 C 0.6166(3) 0.25827(13) 0.59574(19) 0.0527(6) Uani 1 1 d . . . . .
 H11 H 0.563539 0.239946 0.648992 0.063 Uiso 1 1 calc R U . . .
 C12 C 0.6954(3) 0.27034(13) 0.45346(19) 0.0534(6) Uani 1 1 d . . . . .
 H12 H 0.712908 0.264624 0.386056 0.064 Uiso 1 1 calc R U . . .
 C13 C 0.6051(2) 0.59174(13) 0.29680(14) 0.0418(5) Uani 1 1 d . . . . .
 H13A H 0.496515 0.590880 0.295407 0.050 Uiso 1 1 calc R U . . .
 H13B H 0.636371 0.643546 0.297041 0.050 Uiso 1 1 calc R U . . .
 C14 C 0.7836(2) 0.56769(12) 0.15977(14) 0.0365(4) Uani 1 1 d . . . . .
 H14 H 0.854649 0.603604 0.177239 0.044 Uiso 1 1 calc R U . . .
 C15 C 0.6665(2) 0.48059(15) 0.08933(17) 0.0459(5) Uani 1 1 d . . . . .
 H15 H 0.642023 0.442580 0.044741 0.055 Uiso 1 1 calc R U . . .
 O2 O 0.7414(3) 0.37129(12) 0.80553(15) 0.0689(5) Uani 1 1 d G . . . .
 H2A H 0.794900 0.351591 0.761317 0.103 Uiso 1 1 d G U . . .
 H2B H 0.681696 0.336861 0.822092 0.103 Uiso 1 1 d DG U . . .
 O3 O 0.9529(4) 0.77010(17) 0.6196(2) 0.1023(9) Uani 1 1 d G . . . .
 H3C H 0.907965 0.728363 0.621252 0.154 Uiso 1 1 d G U . . .
 H3D H 0.947639 0.782999 0.558813 0.154 Uiso 1 1 d G U . . .
 B1 B 0.6144(5) 0.2664(2) 1.1656(3) 0.0727(9) Uani 1 1 d D . . . .
 F1B F 0.6306(12) 0.2366(8) 1.0809(6) 0.162(5) Uani 0.475(11) 1 d D . P A 1
 F2B F 0.5777(11) 0.1935(5) 1.1910(11) 0.136(4) Uani 0.475(11) 1 d D . P A 1
 F3B F 0.5079(14) 0.3123(6) 1.1693(13) 0.245(8) Uani 0.475(11) 1 d D . P A 1
 F4B F 0.7485(9) 0.2799(7) 1.2073(6) 0.126(3) Uani 0.475(11) 1 d D . P A 1
 F1A F 0.7315(18) 0.2593(6) 1.1017(12) 0.215(7) Uani 0.525(11) 1 d D . P A 2
 F2A F 0.5635(13) 0.2197(6) 1.2329(6) 0.148(4) Uani 0.525(11) 1 d D . P A 2
 F3A F 0.5108(8) 0.3023(5) 1.1130(8) 0.163(5) Uani 0.525(11) 1 d D . P A 2
 F4A F 0.6798(11) 0.3231(4) 1.2265(5) 0.107(2) Uani 0.525(11) 1 d D . P A 2

loop_
  _atom_site_aniso_label
  _atom_site_aniso_U_11
  _atom_site_aniso_U_22
  _atom_site_aniso_U_33
  _atom_site_aniso_U_23
  _atom_site_aniso_U_13
  _atom_site_aniso_U_12
 Fe1 0.0277(2) 0.0313(2) 0.02113(19) 0.00080(12) 0.00037(14) 0.00069(13)
 O1 0.0467(9) 0.0342(7) 0.0417(8) -0.0032(6) -0.0117(6) -0.0016(6)
 N1 0.0329(8) 0.0359(8) 0.0254(7) 0.0027(6) -0.0011(6) 0.0006(6)
 N2 0.0356(8) 0.0373(8) 0.0236(7) -0.0001(6) -0.0018(6) 0.0045(6)
 N3 0.0420(9) 0.0374(9) 0.0301(8) 0.0040(6) 0.0025(7) -0.0014(7)
 N4 0.0534(10) 0.0311(8) 0.0362(9) 0.0002(7) 0.0029(7) 0.0066(7)
 N5 0.0669(13) 0.0394(10) 0.0348(9) 0.0051(7) 0.0031(8) -0.0008(9)
 N6 0.0665(14) 0.0386(10) 0.0659(14) -0.0042(9) -0.0045(11) -0.0038(9)
 N7 0.0341(8) 0.0494(10) 0.0235(7) -0.0022(7) 0.0013(6) 0.0066(7)
 N8 0.0367(10) 0.0678(14) 0.0458(11) -0.0146(9) 0.0082(8) -0.0088(8)
 N9 0.0318(8) 0.0430(9) 0.0273(8) 0.0001(6) 0.0029(6) 0.0032(7)
 C1 0.0355(9) 0.0378(10) 0.0302(9) 0.0004(7) -0.0002(7) -0.0028(8)
 C2 0.0324(9) 0.0417(10) 0.0255(8) 0.0016(7) 0.0010(7) -0.0012(8)
 C3 0.0411(11) 0.0490(11) 0.0255(9) -0.0030(8) -0.0061(8) 0.0142(9)
 C4 0.0325(9) 0.0364(10) 0.0257(8) -0.0012(7) -0.0015(7) 0.0028(7)
 C5 0.0401(10) 0.0356(10) 0.0314(10) 0.0034(7) -0.0007(8) 0.0056(8)
 C6 0.0364(10) 0.0313(9) 0.0356(10) 0.0023(7) 0.0064(8) 0.0025(7)
 C7 0.0389(10) 0.0394(10) 0.0301(10) -0.0042(7) 0.0062(8) 0.0026(8)
 C8 0.0321(9) 0.0399(10) 0.0263(9) 0.0004(7) 0.0017(7) 0.0031(8)
 C9 0.0338(9) 0.0341(9) 0.0288(9) -0.0006(7) -0.0002(7) 0.0065(7)
 C10 0.0495(12) 0.0370(11) 0.0474(12) 0.0033(9) 0.0108(10) 0.0081(9)
 C11 0.0670(16) 0.0385(12) 0.0528(14) 0.0095(10) 0.0031(11) -0.0021(11)
 C12 0.0750(17) 0.0405(12) 0.0447(12) -0.0087(10) 0.0003(11) 0.0029(11)
 C13 0.0466(11) 0.0546(12) 0.0244(9) -0.0008(8) 0.0045(8) 0.0164(10)
 C14 0.0374(10) 0.0424(11) 0.0299(9) -0.0009(8) 0.0035(8) 0.0003(8)
 C15 0.0357(11) 0.0615(13) 0.0407(12) -0.0169(10) 0.0028(9) -0.0042(10)
 O2 0.0795(14) 0.0693(12) 0.0565(12) -0.0067(9) -0.0198(10) -0.0123(10)
 O3 0.131(2) 0.0898(18) 0.0874(18) 0.0166(14) 0.0265(17) 0.0312(17)
 B1 0.083(3) 0.077(2) 0.058(2) -0.0046(17) 0.0019(18) -0.0022(19)
 F1B 0.141(7) 0.251(13) 0.094(5) -0.076(6) 0.007(5) 0.014(7)
 F2B 0.118(5) 0.091(5) 0.194(11) 0.047(6) -0.069(6) -0.018(4)
 F3B 0.189(11) 0.144(8) 0.407(19) -0.108(10) 0.123(12) 0.060(7)
 F4B 0.095(5) 0.173(9) 0.110(5) -0.021(5) -0.003(4) -0.064(5)
 F1A 0.254(13) 0.151(7) 0.248(14) 0.014(7) 0.168(12) 0.046(8)
 F2A 0.219(8) 0.129(6) 0.094(4) 0.047(4) -0.047(4) -0.105(6)
 F3A 0.127(6) 0.130(6) 0.225(9) 0.096(6) -0.106(6) -0.033(4)
 F4A 0.133(6) 0.108(4) 0.079(3) -0.001(3) -0.010(3) -0.042(4)

_geom_special_details
;
 All esds (except the esd in the dihedral angle between two l.s. planes)
 are estimated using the full covariance matrix.  The cell esds are taken
 into account individually in the estimation of esds in distances, angles
 and torsion angles; correlations between esds in cell parameters are only
 used when they are defined by crystal symmetry.  An approximate (isotropic)
 treatment of cell esds is used for estimating esds involving l.s. planes.
;
loop_
  _geom_bond_atom_site_label_1
  _geom_bond_atom_site_label_2
  _geom_bond_distance
  _geom_bond_site_symmetry_2
  _geom_bond_publ_flag
 Fe1 O1 2.0781(14) 3_767 ?
 Fe1 O1 2.0781(14) . ?
 Fe1 N1 2.1940(15) 3_767 ?
 Fe1 N1 2.1940(15) . ?
 Fe1 N9 2.2179(16) 3_766 ?
 Fe1 N9 2.2179(16) 1_556 ?
 O1 H1A 0.8500 . ?
 O1 H1B 0.8496 . ?
 N1 C1 1.359(2) . ?
 N1 C2 1.324(2) . ?
 N2 N3 1.361(2) . ?
 N2 C2 1.323(2) . ?
 N2 C3 1.458(2) . ?
 N3 C1 1.309(3) . ?
 N4 N5 1.350(2) . ?
 N4 C10 1.462(3) . ?
 N4 C12 1.326(3) . ?
 N5 C11 1.302(3) . ?
 N6 C11 1.340(3) . ?
 N6 C12 1.312(4) . ?
 N7 N8 1.359(3) . ?
 N7 C13 1.459(2) . ?
 N7 C14 1.321(3) . ?
 N8 C15 1.310(3) . ?
 N9 C14 1.328(3) . ?
 N9 C15 1.350(3) . ?
 C1 H1 0.9300 . ?
 C2 H2 0.9300 . ?
 C3 H3A 0.9700 . ?
 C3 H3B 0.9700 . ?
 C3 C4 1.516(3) . ?
 C4 C5 1.388(3) . ?
 C4 C9 1.384(3) . ?
 C5 H5 0.9300 . ?
 C5 C6 1.388(3) . ?
 C6 C7 1.390(3) . ?
 C6 C10 1.512(3) . ?
 C7 H7 0.9300 . ?
 C7 C8 1.388(3) . ?
 C8 C9 1.393(3) . ?
 C8 C13 1.503(3) . ?
 C9 H9 0.9300 . ?
 C10 H10A 0.9700 . ?
 C10 H10B 0.9700 . ?
 C11 H11 0.9300 . ?
 C12 H12 0.9300 . ?
 C13 H13A 0.9700 . ?
 C13 H13B 0.9700 . ?
 C14 H14 0.9300 . ?
 C15 H15 0.9300 . ?
 O2 H2A 0.8501 . ?
 O2 H2B 0.8497 . ?
 O3 H3C 0.8498 . ?
 O3 H3D 0.8500 . ?
 B1 F1B 1.271(8) . ?
 B1 F2B 1.392(9) . ?
 B1 F3B 1.259(9) . ?
 B1 F4B 1.332(7) . ?
 B1 F1A 1.380(8) . ?
 B1 F2A 1.323(8) . ?
 B1 F3A 1.317(6) . ?
 B1 F4A 1.421(7) . ?
 F1B F2B 1.747(19) . ?

loop_
  _geom_angle_atom_site_label_1
  _geom_angle_atom_site_label_2
  _geom_angle_atom_site_label_3
  _geom_angle
  _geom_angle_site_symmetry_1
  _geom_angle_site_symmetry_3
  _geom_angle_publ_flag
 O1 Fe1 O1 180.0 3_767 . ?
 O1 Fe1 N1 93.72(6) . . ?
 O1 Fe1 N1 86.28(6) . 3_767 ?
 O1 Fe1 N1 86.28(6) 3_767 . ?
 O1 Fe1 N1 93.72(6) 3_767 3_767 ?
 O1 Fe1 N9 88.40(6) . 3_766 ?
 O1 Fe1 N9 91.60(7) . 1_556 ?
 O1 Fe1 N9 88.40(6) 3_767 1_556 ?
 O1 Fe1 N9 91.60(7) 3_767 3_766 ?
 N1 Fe1 N1 180.00(8) . 3_767 ?
 N1 Fe1 N9 93.50(6) 3_767 3_766 ?
 N1 Fe1 N9 86.50(6) . 3_766 ?
 N1 Fe1 N9 93.50(6) . 1_556 ?
 N1 Fe1 N9 86.50(6) 3_767 1_556 ?
 N9 Fe1 N9 180.0 3_766 1_556 ?
 Fe1 O1 H1A 124.2 . . ?
 Fe1 O1 H1B 123.9 . . ?
 H1A O1 H1B 104.5 . . ?
 C1 N1 Fe1 125.02(13) . . ?
 C2 N1 Fe1 132.12(13) . . ?
 C2 N1 C1 102.86(15) . . ?
 N3 N2 C3 120.75(16) . . ?
 C2 N2 N3 110.04(15) . . ?
 C2 N2 C3 128.87(17) . . ?
 C1 N3 N2 102.52(15) . . ?
 N5 N4 C10 120.39(18) . . ?
 C12 N4 N5 109.3(2) . . ?
 C12 N4 C10 130.3(2) . . ?
 C11 N5 N4 102.45(19) . . ?
 C12 N6 C11 102.5(2) . . ?
 N8 N7 C13 121.34(18) . . ?
 C14 N7 N8 109.74(16) . . ?
 C14 N7 C13 128.80(18) . . ?
 C15 N8 N7 102.65(18) . . ?
 C14 N9 Fe1 124.98(14) . 1_554 ?
 C14 N9 C15 102.75(17) . . ?
 C15 N9 Fe1 130.66(15) . 1_554 ?
 N1 C1 H1 122.7 . . ?
 N3 C1 N1 114.51(17) . . ?
 N3 C1 H1 122.7 . . ?
 N1 C2 H2 125.0 . . ?
 N2 C2 N1 110.08(17) . . ?
 N2 C2 H2 125.0 . . ?
 N2 C3 H3A 109.3 . . ?
 N2 C3 H3B 109.3 . . ?
 N2 C3 C4 111.49(15) . . ?
 H3A C3 H3B 108.0 . . ?
 C4 C3 H3A 109.3 . . ?
 C4 C3 H3B 109.3 . . ?
 C5 C4 C3 121.22(17) . . ?
 C9 C4 C3 119.21(17) . . ?
 C9 C4 C5 119.56(17) . . ?
 C4 C5 H5 119.9 . . ?
 C6 C5 C4 120.18(18) . . ?
 C6 C5 H5 119.9 . . ?
 C5 C6 C7 119.72(18) . . ?
 C5 C6 C10 120.05(18) . . ?
 C7 C6 C10 120.23(18) . . ?
 C6 C7 H7 119.6 . . ?
 C8 C7 C6 120.73(18) . . ?
 C8 C7 H7 119.6 . . ?
 C7 C8 C9 118.74(17) . . ?
 C7 C8 C13 123.85(17) . . ?
 C9 C8 C13 117.41(17) . . ?
 C4 C9 C8 121.07(17) . . ?
 C4 C9 H9 119.5 . . ?
 C8 C9 H9 119.5 . . ?
 N4 C10 C6 111.36(17) . . ?
 N4 C10 H10A 109.4 . . ?
 N4 C10 H10B 109.4 . . ?
 C6 C10 H10A 109.4 . . ?
 C6 C10 H10B 109.4 . . ?
 H10A C10 H10B 108.0 . . ?
 N5 C11 N6 115.3(2) . . ?
 N5 C11 H11 122.4 . . ?
 N6 C11 H11 122.4 . . ?
 N4 C12 H12 124.8 . . ?
 N6 C12 N4 110.5(2) . . ?
 N6 C12 H12 124.8 . . ?
 N7 C13 C8 113.79(16) . . ?
 N7 C13 H13A 108.8 . . ?
 N7 C13 H13B 108.8 . . ?
 C8 C13 H13A 108.8 . . ?
 C8 C13 H13B 108.8 . . ?
 H13A C13 H13B 107.7 . . ?
 N7 C14 N9 110.20(18) . . ?
 N7 C14 H14 124.9 . . ?
 N9 C14 H14 124.9 . . ?
 N8 C15 N9 114.7(2) . . ?
 N8 C15 H15 122.7 . . ?
 N9 C15 H15 122.7 . . ?
 H2A O2 H2B 104.5 . . ?
 H3C O3 H3D 104.5 . . ?
 F1B B1 F2B 81.8(11) . . ?
 F1B B1 F4B 109.3(6) . . ?
 F3B B1 F1B 114.5(10) . . ?
 F3B B1 F2B 114.8(8) . . ?
 F3B B1 F4B 122.5(8) . . ?
 F4B B1 F2B 106.4(6) . . ?
 F1A B1 F4A 96.8(7) . . ?
 F2A B1 F1A 130.4(8) . . ?
 F2A B1 F4A 101.7(5) . . ?
 F3A B1 F1A 104.1(8) . . ?
 F3A B1 F2A 115.3(7) . . ?
 F3A B1 F4A 103.5(5) . . ?
 B1 F1B F2B 52.1(7) . . ?
 B1 F2B F1B 46.1(6) . . ?

loop_
  _geom_hbond_atom_site_label_D
  _geom_hbond_atom_site_label_H
  _geom_hbond_atom_site_label_A
  _geom_hbond_distance_DH
  _geom_hbond_distance_HA
  _geom_hbond_distance_DA
  _geom_hbond_angle_DHA
  _geom_hbond_site_symmetry_A
  _geom_hbond_publ_flag
 C1 H1 F4B 0.93 2.50 3.218(7) 134.1 3_767 yes
 C1 H1 F4A 0.93 2.47 3.308(8) 150.6 3_767 yes
 C2 H2 N8 0.93 2.49 3.329(3) 150.7 3_666 yes
 C10 H10A N3 0.97 2.61 3.537(3) 161.0 3_766 yes
 C12 H12 F4B 0.93 2.45 3.362(9) 167.1 1_554 yes
 C12 H12 F2A 0.93 2.55 3.290(9) 136.3 1_554 yes
 C12 H12 F4A 0.93 2.40 3.196(6) 143.5 1_554 yes
 C13 H13A O2 0.97 2.58 3.419(3) 144.6 3_666 yes
 C14 H14 F2B 0.93 2.46 3.243(8) 142.1 2_656 yes
 C14 H14 F2A 0.93 2.51 3.357(10) 152.3 2_656 yes

loop_
  _geom_torsion_atom_site_label_1
  _geom_torsion_atom_site_label_2
  _geom_torsion_atom_site_label_3
  _geom_torsion_atom_site_label_4
  _geom_torsion
  _geom_torsion_site_symmetry_1
  _geom_torsion_site_symmetry_2
  _geom_torsion_site_symmetry_3
  _geom_torsion_site_symmetry_4
  _geom_torsion_publ_flag
 Fe1 N1 C1 N3 179.66(13) . . . . ?
 Fe1 N1 C2 N2 179.94(13) . . . . ?
 Fe1 N9 C14 N7 -166.89(13) 1_554 . . . ?
 Fe1 N9 C15 N8 165.62(16) 1_554 . . . ?
 N2 N3 C1 N1 0.7(2) . . . . ?
 N2 C3 C4 C5 34.9(3) . . . . ?
 N2 C3 C4 C9 -146.58(19) . . . . ?
 N3 N2 C2 N1 0.1(2) . . . . ?
 N3 N2 C3 C4 65.9(2) . . . . ?
 N4 N5 C11 N6 0.1(3) . . . . ?
 N5 N4 C10 C6 -72.4(3) . . . . ?
 N5 N4 C12 N6 -0.3(3) . . . . ?
 N7 N8 C15 N9 0.3(3) . . . . ?
 N8 N7 C13 C8 89.6(2) . . . . ?
 N8 N7 C14 N9 0.2(2) . . . . ?
 C1 N1 C2 N2 0.3(2) . . . . ?
 C2 N1 C1 N3 -0.6(2) . . . . ?
 C2 N2 N3 C1 -0.5(2) . . . . ?
 C2 N2 C3 C4 -106.6(2) . . . . ?
 C3 N2 N3 C1 -174.33(17) . . . . ?
 C3 N2 C2 N1 173.32(18) . . . . ?
 C3 C4 C5 C6 177.39(19) . . . . ?
 C3 C4 C9 C8 -177.44(18) . . . . ?
 C4 C5 C6 C7 0.3(3) . . . . ?
 C4 C5 C6 C10 -179.12(19) . . . . ?
 C5 C4 C9 C8 1.1(3) . . . . ?
 C5 C6 C7 C8 0.6(3) . . . . ?
 C5 C6 C10 N4 82.1(3) . . . . ?
 C6 C7 C8 C9 -0.6(3) . . . . ?
 C6 C7 C8 C13 179.5(2) . . . . ?
 C7 C6 C10 N4 -97.3(2) . . . . ?
 C7 C8 C9 C4 -0.3(3) . . . . ?
 C7 C8 C13 N7 -11.4(3) . . . . ?
 C9 C4 C5 C6 -1.2(3) . . . . ?
 C9 C8 C13 N7 168.63(18) . . . . ?
 C10 N4 N5 C11 177.61(19) . . . . ?
 C10 N4 C12 N6 -177.5(2) . . . . ?
 C10 C6 C7 C8 179.99(19) . . . . ?
 C11 N6 C12 N4 0.3(3) . . . . ?
 C12 N4 N5 C11 0.1(2) . . . . ?
 C12 N4 C10 C6 104.5(3) . . . . ?
 C12 N6 C11 N5 -0.3(3) . . . . ?
 C13 N7 N8 C15 -176.52(19) . . . . ?
 C13 N7 C14 N9 176.09(18) . . . . ?
 C13 C8 C9 C4 179.67(19) . . . . ?
 C14 N7 N8 C15 -0.3(2) . . . . ?
 C14 N7 C13 C8 -85.9(3) . . . . ?
 C14 N9 C15 N8 -0.1(3) . . . . ?
 C15 N9 C14 N7 -0.1(2) . . . . ?
 F3B B1 F1B F2B -113.6(9) . . . . ?
 F3B B1 F2B F1B 113.3(10) . . . . ?
 F4B B1 F1B F2B 104.6(8) . . . . ?
 F4B B1 F2B F1B -107.8(7) . . . . ?

_shelx_res_file
;
TITL al_bf5a_a.res in P2(1)/n
    al_bf5a.res
    created by SHELXL-2017/1 at 13:30:17 on 01-Sep-2023
REM Old TITL AL_BF5a in P2(1)/n
REM SHELXT solution in P2(1)/n
REM R1 0.147, Rweak 0.004, Alpha 0.030, Orientation as input
REM Formula found by SHELXT: C44 N14 O4 B2 Fe
REM Instructions for potential hydrogen bonds
CELL 0.71073 8.9379 17.9291 13.4514 90 91.562 90
ZERR 2 0.0008 0.0016 0.0013 0 0.004 0
LATT 1
SYMM 0.5-X,0.5+Y,0.5-Z
SFAC C H B F Fe N O
UNIT 60 84 4 16 2 36 12
EQIV $1 +X,+Y,-1+Z
EQIV $2 2-X,1-Y,2-Z
EQIV $3 2-X,1-Y,1-Z
EQIV $4 1-X,1-Y,1-Z
EQIV $5 1.5-X,0.5+Y,1.5-Z
SADI Fe1 H1a Fe1 H1b
DFIX 2.2 0.01 H1a H2b
SADI F2B B1 F4A B1
SADI F4B B1 F1A B1
SADI B1 F3B B1 F3A
SADI B1 F1B B1 F2A

L.S. 50
PLAN  5 0 0
SIZE 0.5 0.2 0.2
TEMP 0
CONF
HTAB C1 F4B_$2
HTAB C1 F4A_$2
HTAB C2 N8_$4
HTAB C10 N3_$3
HTAB C12 F4B_$1
HTAB C12 F2A_$1
HTAB C12 F4A_$1
HTAB C13 O2_$4
HTAB C14 F2B_$5
HTAB C14 F2A_$5
BOND $H
list 4
MORE -1
fmap 2
acta
REM <olex2.extras>
REM <HklSrc "%.\\AL_BF5a.hkl">
REM </olex2.extras>

WGHT    0.081100    0.762200
FVAR       0.48596   0.47459
FE1   5    1.000000    0.500000    1.000000    10.50000    0.02774    0.03130 =
         0.02113    0.00080    0.00037    0.00069
AFIX   6
O1    7    0.925755    0.394532    0.957739    11.00000    0.04674    0.03417 =
         0.04165   -0.00322   -0.01172   -0.00164
H1A   2    0.868802    0.385972    0.907398    11.00000   -1.50000
H1B   2    0.977579    0.355062    0.964756    11.00000   -1.50000
AFIX   0
N1    6    0.910354    0.553643    0.864413    11.00000    0.03288    0.03589 =
         0.02541    0.00273   -0.00111    0.00058
N2    6    0.774814    0.595104    0.740045    11.00000    0.03558    0.03726 =
         0.02361   -0.00008   -0.00185    0.00453
N3    6    0.914318    0.622701    0.725326    11.00000    0.04197    0.03745 =
         0.03010    0.00398    0.00248   -0.00143
N4    6    0.758735    0.321850    0.511496    11.00000    0.05339    0.03108 =
         0.03621    0.00020    0.00293    0.00661
N5    6    0.708040    0.314576    0.604609    11.00000    0.06686    0.03941 =
         0.03480    0.00507    0.00313   -0.00079
N6    6    0.604510    0.228598    0.504436    11.00000    0.06653    0.03857 =
         0.06588   -0.00418   -0.00446   -0.00380
N7    6    0.657755    0.556122    0.206749    11.00000    0.03415    0.04937 =
         0.02353   -0.00215    0.00132    0.00662
N8    6    0.580133    0.499510    0.162270    11.00000    0.03669    0.06778 =
         0.04582   -0.01459    0.00819   -0.00882
N9    6    0.793971    0.520645    0.084035    11.00000    0.03183    0.04299 =
         0.02733    0.00011    0.00290    0.00315
C1    1    0.990830    0.596700    0.802125    11.00000    0.03547    0.03776 =
         0.03024    0.00041   -0.00017   -0.00278
AFIX  43
H1    2    1.091960    0.606851    0.813170    11.00000   -1.20000
AFIX   0
C2    1    0.774763    0.554512    0.822208    11.00000    0.03245    0.04175 =
         0.02553    0.00156    0.00096   -0.00118
AFIX  43
H2    2    0.691641    0.530151    0.846732    11.00000   -1.20000
AFIX   0
C3    1    0.655230    0.605323    0.665346    11.00000    0.04112    0.04895 =
         0.02552   -0.00297   -0.00612    0.01419
AFIX  23
H3A   2    0.644166    0.658043    0.650713    11.00000   -1.20000
H3B   2    0.561664    0.587623    0.691601    11.00000   -1.20000
AFIX   0
C4    1    0.687466    0.563558    0.570333    11.00000    0.03246    0.03638 =
         0.02567   -0.00118   -0.00151    0.00277
C5    1    0.761085    0.495368    0.572495    11.00000    0.04007    0.03563 =
         0.03138    0.00342   -0.00069    0.00562
AFIX  43
H5    2    0.795133    0.475533    0.632858    11.00000   -1.20000
AFIX   0
C6    1    0.784004    0.456724    0.484820    11.00000    0.03642    0.03132 =
         0.03561    0.00227    0.00635    0.00250
C7    1    0.733568    0.486766    0.394689    11.00000    0.03894    0.03936 =
         0.03006   -0.00419    0.00617    0.00259
AFIX  43
H7    2    0.748219    0.460613    0.336046    11.00000   -1.20000
AFIX   0
C8    1    0.661580    0.555370    0.391273    11.00000    0.03206    0.03989 =
         0.02633    0.00040    0.00168    0.00309
C9    1    0.639522    0.593334    0.480032    11.00000    0.03384    0.03405 =
         0.02882   -0.00064   -0.00024    0.00646
AFIX  43
H9    2    0.591808    0.639432    0.478590    11.00000   -1.20000
AFIX   0
C10   1    0.862218    0.381972    0.487564    11.00000    0.04946    0.03701 =
         0.04737    0.00331    0.01076    0.00812
AFIX  23
H10A  2    0.905145    0.372251    0.423386    11.00000   -1.20000
H10B  2    0.943208    0.383271    0.537023    11.00000   -1.20000
AFIX   0
C11   1    0.616641    0.258271    0.595738    11.00000    0.06703    0.03850 =
         0.05279    0.00946    0.00306   -0.00208
AFIX  43
H11   2    0.563539    0.239946    0.648992    11.00000   -1.20000
AFIX   0
C12   1    0.695370    0.270342    0.453460    11.00000    0.07504    0.04047 =
         0.04472   -0.00874    0.00029    0.00295
AFIX  43
H12   2    0.712908    0.264624    0.386056    11.00000   -1.20000
AFIX   0
C13   1    0.605064    0.591743    0.296804    11.00000    0.04663    0.05465 =
         0.02436   -0.00084    0.00448    0.01644
AFIX  23
H13A  2    0.496515    0.590880    0.295407    11.00000   -1.20000
H13B  2    0.636371    0.643546    0.297041    11.00000   -1.20000
AFIX   0
C14   1    0.783599    0.567692    0.159774    11.00000    0.03739    0.04240 =
         0.02988   -0.00088    0.00346    0.00031
AFIX  43
H14   2    0.854649    0.603604    0.177239    11.00000   -1.20000
AFIX   0
C15   1    0.666516    0.480586    0.089335    11.00000    0.03570    0.06150 =
         0.04071   -0.01687    0.00285   -0.00421
AFIX  43
H15   2    0.642023    0.442580    0.044741    11.00000   -1.20000
AFIX   6

O2    7    0.741403    0.371292    0.805535    11.00000    0.07951    0.06933 =
         0.05655   -0.00665   -0.01975   -0.01226
H2A   2    0.794900    0.351591    0.761317    11.00000   -1.50000
H2B   2    0.681696    0.336861    0.822092    11.00000   -1.50000
AFIX   6

O3    7    0.952882    0.770102    0.619613    11.00000    0.13101    0.08985 =
         0.08744    0.01665    0.02649    0.03122
H3C   2    0.907965    0.728363    0.621252    11.00000   -1.50000
H3D   2    0.947639    0.782999    0.558813    11.00000   -1.50000
AFIX   0

B1    3    0.614362    0.266419    1.165632    11.00000    0.08276    0.07742 =
         0.05790   -0.00456    0.00188   -0.00216
PART 1
F1B   4    0.630586    0.236551    1.080881    21.00000    0.14113    0.25096 =
         0.09394   -0.07628    0.00663    0.01438
F2B   4    0.577722    0.193542    1.191030    21.00000    0.11768    0.09090 =
         0.19409    0.04693   -0.06935   -0.01752
F3B   4    0.507946    0.312257    1.169296    21.00000    0.18949    0.14417 =
         0.40671   -0.10802    0.12309    0.06015
F4B   4    0.748506    0.279884    1.207310    21.00000    0.09493    0.17308 =
         0.10970   -0.02129   -0.00342   -0.06398
PART 2
F1A   4    0.731548    0.259252    1.101657   -21.00000    0.25398    0.15064 =
         0.24788    0.01385    0.16830    0.04587
F2A   4    0.563530    0.219679    1.232891   -21.00000    0.21851    0.12850 =
         0.09417    0.04690   -0.04654   -0.10459
F3A   4    0.510826    0.302270    1.112986   -21.00000    0.12659    0.13046 =
         0.22461    0.09560   -0.10603   -0.03321
F4A   4    0.679776    0.323105    1.226490   -21.00000    0.13260    0.10805 =
         0.07931   -0.00104   -0.01014   -0.04221
HKLF 4


REM  al_bf5a_a.res in P2(1)/n
REM R1 =  0.0435 for    4082 Fo > 4sig(Fo)  and  0.0530 for all    4915 data
REM    341 parameters refined using      6 restraints

END

WGHT      0.0809      0.7775

REM Highest difference peak  0.448,  deepest hole -0.355,  1-sigma level  0.059
Q1    1   0.6020  0.2922  1.0859  11.00000  0.05    0.45
Q2    1   0.5105  0.2679  1.2390  11.00000  0.05    0.35
Q3    1   0.5243  0.3149  1.0768  11.00000  0.05    0.35
Q4    1   0.7120  0.5154  0.0699  11.00000  0.05    0.27
Q5    1   0.6298  0.2078  1.1272  11.00000  0.05    0.26
;
_shelx_res_checksum                90204
_shelx_hkl_file
;
   1   0   0    0.00    0.10
   1   0   0    0.00    0.10
  -1   0   0    0.00    0.10
  -1   0   0    0.00    0.10
   2   0   0 2933.31   78.89
   2   0   0 2958.80   78.89
  -2   0   0 2926.21   79.09
  -2   0   0 2932.41   79.09
  -3   0   0    0.30    0.30
   3   0   0    0.40    0.20
   3   0   0    0.30    0.30
  -3   0   0    0.20    0.20
  -4   0   0  443.56   12.40
  -4   0   0  442.76   12.60
   4   0   0  435.16   12.00
  -5   0   0    1.60    0.60
  -5   0   0    2.40    0.60
  -6   0   0   37.10    2.10
  -7   0   0    1.70    0.80
  -7   0   0    1.40    0.80
  -8   0   0  122.79    5.00
  -9   0   0    1.30    1.10
 -10   0   0   46.80    3.40
 -11   0   0   -0.20    1.20
   0  -1   0    0.00    0.10
   0  -1   0    0.00    0.10
   0  -1   0    0.00    0.10
   0  -1   0    0.00    0.10
   0   1   0    0.00    0.10
   0   1   0    0.00    0.10
   0   1   0    0.00    0.10
  -1  -1   0  346.37   10.90
  -1  -1   0  401.26   10.90
   1   1   0  425.76   10.90
   1   1   0  418.66   10.90
  -2  -1   0 2211.18   57.59
  -2  -1   0 2100.49   57.29
   2   1   0 2069.29   57.39
  -2   1   0 2117.69   57.29
   2   1   0 2146.79   57.19
  -2   1   0 2144.79   57.19
  -3  -1   0 1972.80   53.69
  -3  -1   0 2004.80   53.89
  -3   1   0 2031.90   53.49
   3   1   0 1943.41   53.59
  -3   1   0 2023.30   53.59
  -4  -1   0   55.99    2.20
  -4  -1   0   57.79    2.40
  -4   1   0   56.99    2.20
   4   1   0   57.19    2.10
  -4   1   0   59.79    2.10
  -5  -1   0  231.18    7.20
  -5   1   0  224.28    6.90
  -5   1   0  227.38    6.80
   5   1   0  222.48    6.60
  -6  -1   0  108.49    4.20
  -6  -1   0  110.69    4.20
  -6   1   0  107.19    4.00
  -6   1   0  112.59    4.00
  -6   1   0  109.49    3.90
   6   1   0  109.99    3.40
  -7  -1   0   97.89    4.20
  -7  -1   0   95.99    4.20
  -7   1   0  101.99    4.00
  -7   1   0  100.79    4.00
  -8  -1   0   86.59    4.10
  -8   1   0   84.79    3.90
  -9  -1   0  393.16   13.00
  -9   1   0  403.76   12.80
 -10  -1   0    7.50    1.80
 -10   1   0    5.80    1.50
 -11  -1   0    2.10    1.50
 -11   1   0    3.30    1.60
   0  -2   0 1362.06   36.00
   0  -2   0 1353.76   36.10
   0  -2   0 1392.66   36.30
   0  -2   0 1394.16   36.10
   0   2   0 1314.07   35.90
   0   2   0 1333.97   36.30
   0   2   0 1230.18   36.20
  -1  -2   0  130.89    4.10
  -1  -2   0  146.09    4.10
   1   2   0  138.19    4.20
   1   2   0  141.49    4.10
  -2  -2   0  723.13   20.10
  -2  -2   0  729.23   20.00
   2   2   0  727.43   19.90
   2   2   0  737.23   20.30
  -3  -2   0  751.02   20.40
  -3  -2   0  699.43   20.20
  -3   2   0  726.53   19.70
  -3   2   0  738.13   19.80
   3   2   0  740.63   20.10
  -4  -2   0  372.06   10.60
  -4   2   0  357.66   10.10
   4   2   0  343.57   10.20
  -4   2   0  361.76   10.00
  -5  -2   0  239.38    7.80
  -5   2   0  239.28    7.20
   5   2   0  252.07    7.30
  -5   2   0  245.78    7.30
  -6  -2   0  155.18    5.70
  -6  -2   0  162.08    5.70
  -6   2   0  151.28    5.20
   6   2   0  160.98    4.90
  -6   2   0  158.18    5.30
  -6   2   0  155.48    5.10
  -7  -2   0    3.70    1.10
  -7  -2   0    1.80    0.90
  -7   2   0    4.00    0.90
   7   2   0    3.90    0.60
  -8  -2   0   16.90    2.00
  -8   2   0   19.50    1.90
  -9  -2   0    5.70    1.60
  -9   2   0    1.20    1.10
 -10  -2   0   25.00    2.80
 -10   2   0   21.20    2.50
 -11  -2   0   -0.90    1.20
 -11   2   0    0.00    1.10
   0  -3   0    0.30    0.30
   0  -3   0    0.00    0.20
   0  -3   0    0.20    0.20
   0  -3   0    0.00    0.20
   0   3   0    0.20    0.20
   0   3   0    0.10    0.20
   0   3   0    0.10    0.30
  -1  -3   0  106.09    3.30
  -1  -3   0  105.09    3.30
   1   3   0  107.79    3.30
  -1   3   0  103.49    2.90
  -1   3   0  102.79    3.30
  -1   3   0  105.89    2.90
   1   3   0  103.89    3.40
  -2  -3   0 7294.77  196.58
   2   3   0 7321.47  196.98
  -3  -3   0  288.47    8.70
   3   3   0  293.47    8.50
  -4  -3   0    4.60    0.90
  -4   3   0    4.30    0.50
  -4   3   0    4.00    0.50
   4   3   0    3.10    0.60
  -5  -3   0 1406.06   39.40
  -5   3   0 1467.15   38.50
   5   3   0 1428.46   38.80
  -5   3   0 1393.26   38.60
  -6  -3   0  209.98    7.20
  -6  -3   0  203.18    7.10
   6   3   0  206.38    6.40
  -6   3   0  207.08    6.50
  -6   3   0  209.08    6.40
  -6   3   0  203.98    6.30
  -7  -3   0   24.30    2.30
  -7  -3   0   22.30    2.10
   7   3   0   23.70    1.40
  -7   3   0   24.40    1.70
  -8  -3   0  110.29    5.10
  -8   3   0  114.29    4.50
  -9  -3   0  179.98    7.30
  -9   3   0  177.38    6.60
 -10  -3   0   13.00    2.30
 -10   3   0   10.10    1.70
 -11  -3   0    4.60    1.70
 -11   3   0    1.90    1.30
   0  -4   0 3088.89   84.79
   0  -4   0 3099.09   84.89
   0  -4   0 3199.78   84.59
   0  -4   0 3230.98   84.79
   0   4   0 2928.41   85.29
   0   4   0 3199.58   84.79
   0   4   0 3301.87   85.39
  -1  -4   0 7160.58  194.28
  -1  -4   0 7416.76  193.78
   1   4   0 7255.87  193.28
  -1   4   0 7072.89  192.38
   1   4   0 7377.16  193.98
  -1   4   0 6860.21  192.28
  -1   4   0 7155.98  192.38
  -2  -4   0    3.60    0.60
   2   4   0    3.90    0.60
  -2   4   0    3.50    0.60
  -4  -4   0  589.24   17.10
  -4   4   0  597.14   16.10
  -4   4   0  580.14   16.10
   4   4   0  605.64   16.80
  -5  -4   0    1.30    0.80
   5   4   0   -0.40    0.40
  -5   4   0    0.10    0.30
  -5   4   0    1.10    0.40
  -6  -4   0   54.69    3.00
  -6  -4   0   61.79    3.20
  -6   4   0   59.49    2.30
  -6   4   0   51.99    2.20
   6   4   0   59.89    2.60
  -7  -4   0    5.00    1.20
  -7  -4   0    6.40    1.40
   7   4   0    5.70    0.90
  -7   4   0    6.80    1.00
  -8  -4   0   21.20    2.50
  -8   4   0   23.20    1.90
  -9  -4   0   -0.80    1.10
  -9   4   0   -0.60    0.80
 -10  -4   0   49.50    3.80
 -10   4   0   42.10    2.90
 -11  -4   0   -0.20    1.30
 -11   4   0   -0.60    1.00
   0  -5   0    1.00    0.30
  -1  -5   0  250.07    7.30
  -1  -5   0  248.68    7.50
  -1  -5   0  237.88    7.30
   1  -5   0  246.78    7.40
  -1   5   0  242.38    7.00
  -1   5   0  253.17    7.40
  -1   5   0  240.68    6.90
  -2  -5   0  697.83   19.50
  -2   5   0  676.83   18.70
  -2   5   0  710.93   18.70
  -2   5   0  709.93   19.40
  -2   5   0  667.23   18.70
   2   5   0  711.33   19.40
  -3  -5   0    8.50    1.10
   3   5   0    7.30    0.90
  -4   5   0  188.98    5.10
  -4   5   0  179.58    5.20
  -5  -5   0   33.00    2.20
  -5  -5   0   31.30    2.10
  -5   5   0   34.10    1.30
   5   5   0   30.00    1.80
  -5   5   0   31.50    1.40
  -6  -5   0    0.00    0.70
  -6  -5   0   -0.40    0.40
   6   5   0    0.30    0.60
  -6   5   0    0.70    0.50
  -6   5   0    0.40    0.40
  -7  -5   0  296.57   10.00
  -7  -5   0  288.07    9.90
  -7   5   0  283.07    8.80
   7   5   0  299.17    9.10
  -8  -5   0   60.59    3.60
  -8   5   0   48.00    2.60
  -9  -5   0   17.90    2.60
  -9   5   0   18.80    1.90
 -10  -5   0   12.90    2.40
 -10   5   0   11.60    1.80
 -11  -5   0    5.90    2.00
 -11   5   0    5.60    1.50
   0  -6   0  890.11   24.30
   0  -6   0  886.41   24.70
   0   6   0  896.91   24.40
   0   6   0  880.21   24.40
   0   6   0  885.81   24.70
  -1  -6   0   23.50    1.30
   1  -6   0   20.50    0.80
   1  -6   0   19.90    0.80
   1  -6   0   17.70    1.20
  -1  -6   0   20.80    1.40
  -1  -6   0   18.80    1.20
  -1   6   0   18.40    1.30
  -1   6   0   19.80    1.10
  -1   6   0   20.50    1.00
  -2  -6   0    0.10    0.50
  -2  -6   0    0.00    0.20
  -2  -6   0    0.10    0.30
  -2   6   0    1.60    0.60
  -2   6   0    1.80    0.30
  -2   6   0    0.80    0.30
  -3  -6   0  317.17    9.80
  -3  -6   0  309.67    9.80
   3   6   0  312.07    9.60
  -3   6   0  331.07    9.60
  -3   6   0  320.67    8.70
  -4  -6   0 1416.86   38.70
  -4  -6   0 1391.16   38.70
   4   6   0 1378.66   38.40
  -4   6   0 1390.16   37.40
  -5  -6   0   15.20    1.80
  -5   6   0   18.80    1.00
  -5   6   0   18.80    0.90
   5   6   0   19.90    1.60
  -6   6   0   36.20    1.70
  -6   6   0   37.30    1.60
   6   6   0   31.60    2.00
  -7  -6   0    2.60    1.20
  -7  -6   0    2.00    1.10
   7   6   0    0.10    0.30
  -7   6   0    0.90    0.60
  -8  -6   0   33.90    3.20
  -8   6   0   24.40    1.80
  -9  -6   0    3.70    1.60
  -9   6   0    3.40    1.00
 -10  -6   0    8.10    2.10
 -10   6   0    7.60    1.40
 -11  -6   0   -0.40    1.40
 -11   6   0    1.00    1.10
   0  -7   0    1.10    0.40
   0   7   0    2.10    0.50
   0   7   0    2.40    0.70
   0   7   0    1.10    0.50
  -1  -7   0  602.84   17.40
   1  -7   0  605.84   17.20
  -1  -7   0  609.54   17.00
  -1  -7   0  593.94   17.00
   1  -7   0  583.14   16.30
  -1   7   0  596.64   17.20
  -1   7   0  604.74   16.80
  -1   7   0  614.44   16.70
  -2  -7   0  125.09    4.70
  -2   7   0  116.29    3.80
  -2   7   0  132.49    4.50
  -2   7   0  127.19    3.80
   2   7   0  122.19    4.40
  -3  -7   0   28.20    1.90
  -3  -7   0   25.50    1.90
  -3  -7   0   27.00    1.90
  -3   7   0   32.00    1.20
  -3   7   0   31.70    1.20
   3   7   0   29.30    1.80
  -3   7   0   31.80    1.80
  -4  -7   0    0.50    0.80
  -4  -7   0   -0.40    0.70
  -4   7   0    0.00    0.20
  -4   7   0    0.30    0.60
  -4   7   0    0.00    0.30
   4   7   0   -0.50    0.50
  -5  -7   0  306.87   10.20
  -5  -7   0  322.07   10.30
  -5   7   0  298.77    8.90
  -5   7   0  326.47    8.80
  -5   7   0  312.27    9.80
   5   7   0  317.57    9.90
  -6  -7   0    0.10    0.50
  -6   7   0    4.20    0.60
  -6   7   0    2.20    0.60
   6   7   0    3.20    1.00
  -7  -7   0  279.77   10.00
   7   7   0  278.07    9.20
  -7   7   0  291.07    8.50
  -8  -7   0   -0.70    1.10
  -8   7   0    0.40    0.60
  -9  -7   0    1.20    1.40
  -9   7   0    1.10    0.80
 -10  -7   0    2.10    1.70
 -10   7   0    1.80    0.90
 -11  -7   0   21.30    3.20
 -11   7   0   20.80    2.30
   0  -8   0  859.81   24.20
   0  -8   0  860.41   23.60
   0   8   0  838.02   24.20
   0   8   0  851.61   23.80
   1  -8   0  304.37    8.50
  -1  -8   0  296.97    9.20
  -1  -8   0  300.37    9.60
   1  -8   0  302.57    9.40
  -1   8   0  303.57    9.00
  -1   8   0  299.97    9.50
  -1   8   0  318.27    9.00
  -2  -8   0  782.62   22.40
  -2  -8   0  766.22   22.10
  -2  -8   0  761.12   22.00
  -2   8   0  792.62   21.40
   2   8   0  755.42   22.00
  -2   8   0  790.72   21.50
  -2   8   0  797.12   22.20
  -3  -8   0   46.80    2.60
  -3  -8   0   42.40    2.50
  -3  -8   0   48.50    2.70
   3   8   0   47.10    2.50
  -3   8   0   46.80    2.40
  -3   8   0   47.10    1.80
  -3   8   0   47.60    1.80
  -4  -8   0    8.50    1.40
  -4  -8   0    7.10    1.30
  -4  -8   0    8.30    1.40
  -4   8   0    8.80    0.70
  -4   8   0    8.60    0.70
  -4   8   0    7.50    1.10
   4   8   0   11.40    1.50
  -5  -8   0    3.20    1.10
  -5  -8   0    2.90    1.10
  -5   8   0    1.30    0.50
   5   8   0    3.30    1.00
  -5   8   0    1.30    0.40
  -5   8   0    0.50    0.70
  -6  -8   0   -0.40    0.90
  -6  -8   0    1.10    1.00
  -6   8   0    0.70    0.40
  -6   8   0    1.40    0.50
  -6   8   0    1.20    0.80
   6   8   0    0.20    0.80
  -7  -8   0   10.60    1.90
   7   8   0    9.90    1.50
  -7   8   0   11.10    1.10
  -7   8   0    6.60    1.30
  -8  -8   0   93.29    5.00
  -8   8   0   91.89    3.60
  -9  -8   0   21.40    2.90
  -9   8   0   21.90    1.80
 -10  -8   0    8.90    2.10
 -10   8   0    6.20    1.30
   0  -9   0    0.20    0.40
   0  -9   0   -0.20    0.60
   0   9   0    0.80    0.60
   0   9   0    0.70    0.70
  -1  -9   0  734.73   20.50
  -1  -9   0  713.03   21.00
   1  -9   0  706.23   19.70
   1  -9   0  728.93   20.80
  -1   9   0  733.63   20.90
  -1   9   0  704.83   20.30
  -1   9   0  738.03   20.40
  -2  -9   0  317.27    9.70
  -2  -9   0  319.17   10.10
  -2  -9   0  310.27    9.70
   2   9   0  317.37    9.80
  -2   9   0  311.27    9.20
  -2   9   0  310.07    9.80
  -2   9   0  298.27    9.10
  -3  -9   0   83.69    3.80
  -3  -9   0   88.49    4.00
  -3  -9   0   86.49    3.80
  -3   9   0   85.19    3.70
   3   9   0   86.29    3.70
  -3   9   0   80.89    3.00
  -3   9   0   90.39    3.00
  -4  -9   0   10.90    1.60
  -4  -9   0   13.80    1.70
  -4   9   0   13.40    0.90
  -4   9   0   11.60    0.90
   4   9   0   11.30    1.50
  -4   9   0    9.20    1.30
  -5  -9   0   95.59    4.60
  -5  -9   0   99.79    4.60
   5   9   0  106.29    4.40
  -5   9   0   99.59    4.20
  -5   9   0   96.59    3.20
  -5   9   0  100.39    3.40
  -6  -9   0   71.09    3.90
  -6   9   0   60.29    2.50
   6   9   0   77.59    3.60
  -6   9   0   74.09    3.40
  -7  -9   0  163.18    6.90
  -7   9   0  165.48    5.30
  -7   9   0  162.28    6.10
   7   9   0  155.58    6.10
  -8  -9   0    2.60    1.40
  -8   9   0   -0.50    0.60
  -9  -9   0   -0.60    1.30
  -9   9   0    1.00    0.80
 -10  -9   0    5.90    2.00
 -10   9   0    6.90    1.30
   0 -10   0  847.82   24.60
   0 -10   0  832.92   23.80
   0  10   0  881.21   24.20
   0  10   0  859.41   24.70
  -1 -10   0  369.96   11.80
   1 -10   0  381.36   10.50
   1 -10   0  373.46   11.70
  -1 -10   0  386.86   11.30
   1  10   0  349.47   11.30
  -1  10   0  363.26   11.70
  -1  10   0  384.36   11.20
  -2 -10   0  537.85   16.60
  -2 -10   0  536.85   16.10
  -2  10   0  556.54   16.30
  -2  10   0  547.55   15.60
   2  10   0  533.55   16.10
  -2  10   0  553.34   15.60
  -3 -10   0   24.40    2.00
  -3  10   0   21.80    1.40
  -3  10   0   18.30    1.80
   3  10   0   21.50    1.80
  -3  10   0   18.80    1.30
  -4 -10   0  311.77   10.40
  -4 -10   0  310.57   10.30
  -4  10   0  310.87    9.10
  -4  10   0  309.97   10.10
   4  10   0  320.57   10.20
  -4  10   0  311.47    9.20
  -5 -10   0   -1.30    0.80
  -5  10   0   -0.60    0.40
  -5  10   0    0.40    0.40
  -5  10   0    0.10    0.70
   5  10   0    0.20    0.90
  -6 -10   0   10.00    1.80
  -6  10   0   11.60    1.60
   6  10   0   15.40    1.90
  -6  10   0   13.60    1.10
  -7 -10   0    2.40    1.30
  -7  10   0   -0.50    0.70
   7  10   0    1.20    1.00
  -7  10   0    0.10    0.60
  -8 -10   0   98.69    5.40
  -8  10   0  101.29    3.80
  -9 -10   0    5.20    2.00
  -9  10   0    7.00    1.20
 -10 -10   0    4.30    2.00
 -10  10   0    6.20    1.30
  -1 -11   0   15.60    1.60
   1 -11   0   19.50    1.10
   1 -11   0   19.60    2.00
  -1  11   0   22.90    1.70
   1  11   0   22.90    1.80
  -1  11   0   23.70    2.00
   2 -11   0    4.00    1.10
  -2 -11   0    2.60    0.90
  -2  11   0    2.80    0.80
  -2  11   0    2.20    0.90
   2  11   0    3.50    1.00
  -2  11   0    4.50    0.80
  -3 -11   0  248.38    8.60
  -3  11   0  253.97    7.90
  -3  11   0  261.17    7.90
   3  11   0  262.97    8.70
  -3  11   0  247.48    8.60
  -4 -11   0   80.19    4.00
  -4  11   0   79.29    3.80
  -4  11   0   75.89    3.10
  -4  11   0   83.39    3.10
   4  11   0   86.19    4.00
  -5 -11   0  289.77   10.20
  -5  11   0  296.37    9.80
  -5  11   0  300.17    8.80
   5  11   0  288.37    9.90
  -6 -11   0   31.00    3.10
   6  11   0   32.20    2.70
  -6  11   0   35.70    1.80
  -6  11   0   36.50    2.60
  -7 -11   0  114.69    5.60
  -7  11   0   93.99    4.50
  -7  11   0  102.29    3.70
   7  11   0  105.59    4.80
  -8 -11   0    0.30    1.20
  -8  11   0    0.80    0.70
  -9 -11   0    8.70    2.30
  -9  11   0    5.20    1.10
 -10 -11   0    3.10    1.90
   0 -12   0  193.78    6.40
   0  12   0  206.68    7.00
   1 -12   0  205.48    6.00
  -1  12   0  196.28    6.80
  -1  12   0  197.78    7.30
  -2 -12   0   74.89    3.50
  -2  12   0   69.99    3.70
  -2  12   0   72.39    3.20
   2  12   0   70.29    3.50
  -4 -12   0  159.58    6.40
  -4  12   0  154.98    6.20
   4  12   0  167.28    6.40
  -4  12   0  163.68    5.50
  -5 -12   0    8.40    1.80
  -5  12   0    4.50    1.20
   5  12   0    6.00    1.40
  -5  12   0    5.10    0.90
  -6 -12   0   36.40    3.50
  -6  12   0   33.70    2.50
  -6  12   0   33.00    1.90
   6  12   0   34.50    2.80
  -7 -12   0    0.00    1.30
  -7  12   0    0.30    0.60
   7  12   0    0.60    1.20
  -7  12   0    0.10    0.90
  -8 -12   0   80.19    5.00
  -8  12   0   71.29    3.10
  -9 -12   0    8.20    2.30
   0 -13   0    2.90    0.70
   1 -13   0    3.20    0.50
  -1  13   0    2.00    0.80
  -1  13   0    2.80    1.00
  -2 -13   0    0.90    0.90
   2  13   0    0.50    0.80
  -2  13   0    0.30    0.60
  -2  13   0    0.50    0.90
  -3 -13   0  148.69    5.80
   3  13   0  135.39    5.70
  -3  13   0  143.69    5.20
  -3  13   0  136.19    5.80
  -4 -13   0  196.58    7.60
  -4  13   0  202.68    6.60
  -4  13   0  200.88    7.50
   4  13   0  184.78    7.30
  -5 -13   0  251.67    9.20
   5  13   0  243.58    8.80
  -5  13   0  248.98    7.80
  -5  13   0  226.98    8.60
  -6 -13   0   22.40    2.80
   6  13   0   20.10    2.50
  -6  13   0   20.90    1.60
  -6  13   0   18.40    2.30
  -7 -13   0   80.19    5.00
   7  13   0   84.09    4.50
  -7  13   0   88.89    3.50
  -8 -13   0   14.90    2.70
   8  13   0   16.00    2.50
  -8  13   0   16.20    1.60
  -9 -13   0   18.40    3.10
   0 -14   0    4.40    0.90
   0  14   0    4.90    1.20
  -1  14   0   25.30    2.00
   1  14   0   14.30    1.80
  -2 -14   0   90.99    4.20
  -2  14   0   96.09    4.60
  -2  14   0   90.39    4.00
   2  14   0   91.89    4.40
  -3 -14   0   18.00    2.20
  -3  14   0   16.20    1.70
  -3  14   0   14.50    2.00
   3  14   0   18.20    2.20
  -4 -14   0   94.99    4.70
  -4  14   0   89.99    4.60
   4  14   0   97.79    4.70
  -4  14   0   90.79    3.90
  -5 -14   0   -0.10    1.20
  -5  14   0    0.40    0.70
  -5  14   0    0.20    1.00
   5  14   0    0.90    1.10
  -6 -14   0   22.20    3.00
  -6  14   0   23.70    1.80
   6  14   0   25.10    2.80
  -6  14   0   21.00    2.40
  -7 -14   0    5.30    1.90
   7  14   0    4.70    1.60
  -7  14   0    3.60    1.00
  -8 -14   0   10.90    2.40
  -8  14   0    9.10    1.30
  -9 -14   0    5.70    2.10
   0 -15   0    0.80    0.70
   0  15   0    1.20    0.90
  -1  15   0   57.99    3.20
   1  15   0   54.19    3.30
  -2 -15   0    7.80    1.50
   2  15   0    7.50    1.50
  -2  15   0    6.00    1.60
  -2  15   0    7.60    1.40
  -3 -15   0   19.30    2.30
  -3  15   0   21.80    2.10
   3  15   0   25.60    2.70
  -3  15   0   16.50    2.30
  -4 -15   0   55.79    3.70
  -4  15   0   57.09    3.60
   4  15   0   61.79    3.80
  -4  15   0   52.29    2.90
  -5 -15   0    1.00    1.30
  -5  15   0    2.40    0.90
   5  15   0    2.90    1.40
  -5  15   0    2.60    1.20
  -6 -15   0    4.40    1.80
  -6  15   0    8.30    1.70
   6  15   0    6.10    1.70
  -6  15   0    7.50    1.20
  -7 -15   0   66.19    4.60
   7  15   0   66.49    4.10
  -7  15   0   61.09    3.20
  -8 -15   0   14.70    2.90
   0  16   0  334.97   11.30
   1  16   0    5.90    1.40
  -1  16   0    6.10    1.40
  -2 -16   0    0.10    0.90
  -2  16   0    0.00    0.80
   2  16   0   -0.70    0.90
  -3 -16   0   -0.10    1.00
  -3  16   0    0.30    0.80
  -3  16   0    0.20    1.00
   3  16   0    0.20    1.00
  -4 -16   0   63.59    4.00
  -4  16   0   57.09    3.80
  -4  16   0   59.69    3.20
   4  16   0   64.69    4.00
  -5 -16   0    9.10    2.10
   5  16   0   12.60    2.20
  -5  16   0    9.70    1.90
  -5  16   0    9.70    1.50
  -6 -16   0    1.70    1.50
   6  16   0    2.50    1.40
  -6  16   0    0.80    0.80
  -6  16   0    1.50    1.20
  -7 -16   0   -1.60    1.30
  -7  16   0    0.70    0.80
   7  16   0   -1.40    1.20
  -8 -16   0    8.30    2.30
   0  17   0    3.00    1.20
   1  17   0   47.90    3.30
  -1  17   0   45.90    3.20
  -2 -17   0   38.00    2.80
  -2  17   0   36.30    2.80
   2  17   0   41.50    3.20
  -3 -17   0   59.09    3.70
   3  17   0   58.89    3.90
  -3  17   0   65.19    4.10
  -3  17   0   59.69    3.50
  -4 -17   0   10.50    2.00
  -4  17   0   15.40    2.00
   4  17   0   15.90    2.40
  -4  17   0   12.80    2.20
  -5 -17   0    3.30    1.60
  -5  17   0    4.80    1.30
   5  17   0    3.10    1.50
  -5  17   0    6.70    1.70
  -6 -17   0    0.00    1.40
  -6  17   0    0.10    0.80
   6  17   0    1.00    1.40
  -7 -17   0    7.50    2.30
  -7  17   0    6.10    1.30
   7  17   0    7.80    2.10
   0  18   0  332.97   11.50
   1  18   0   73.39    4.30
  -1  18   0   70.29    4.10
   2  18   0   19.00    2.60
  -2  18   0   21.10    2.40
  -3 -18   0    5.60    1.50
   3  18   0    7.60    1.80
  -3  18   0    6.10    1.40
  -4 -18   0    7.60    1.80
   4  18   0    5.00    1.70
  -4  18   0    5.90    1.50
  -5 -18   0    0.30    1.30
   5  18   0   -1.80    1.10
  -5  18   0   -1.50    0.90
  -5  18   0   -0.30    0.90
  -6 -18   0    7.70    2.20
  -6  18   0    9.00    1.70
   6  18   0    6.00    1.90
  -7 -18   0   10.20    2.50
   7  18   0   10.00    2.30
  -7  18   0    7.40    1.60
  -1  19   0   78.29    4.40
   1  19   0   81.69    4.70
   2  19   0   14.30    2.30
  -2  19   0   11.00    2.00
  -3  19   0   46.90    3.30
   3  19   0   54.09    4.00
  -4 -19   0    0.70    1.20
  -4  19   0   -0.10    1.00
   4  19   0    1.80    1.40
  -5 -19   0   16.30    2.70
   5  19   0   23.70    3.10
  -5  19   0   22.60    2.50
  -6 -19   0    2.10    1.60
  -6  19   0   -0.40    1.00
   6  19   0   -0.30    1.40
   0  20   0   46.80    3.70
  -1  20   0   19.30    2.60
   1  20   0   22.30    2.90
  -2  20   0   46.50    3.60
   2  20   0   51.69    4.00
  -3  20   0    9.20    1.90
   3  20   0   15.80    2.70
   4  20   0    7.70    2.10
  -4  20   0    7.00    1.70
  -5  20   0    0.60    1.10
   5  20   0    2.60    1.60
   0  21   0    3.30    1.50
   1  21   0    2.50    1.50
  -1  21   0    3.30    1.50
   2  21   0   12.90    2.50
  -2  21   0   10.70    2.10
  -3  21   0   53.79    3.80
   3  21   0   51.19    4.30
   4  21   0   -1.40    1.20
  -4  21   0    0.40    1.10
   5  21   0   55.29    4.50
  -5  21   0   50.29    3.60
   0  22   0   99.69    5.60
  -1  22   0    8.70    2.10
   1  22   0   11.00    2.40
   2  22   0    3.00    1.70
  -2  22   0    2.80    1.50
  -3  22   0    5.20    1.80
   3  22   0    1.70    1.60
   0  23   0    3.50    1.60
  -1  23   0   12.50    2.40
   1  23   0   15.30    2.80
 -11   0   1   45.40    3.60
 -10   0   1    0.90    1.10
  -9   0   1   87.69    4.30
  -9   0   1   87.79    4.30
  -8   0   1    0.30    0.80
  -7   0   1    0.70    0.70
  -6   0   1   -0.10    0.50
  -6   0   1    0.40    0.40
  -5   0   1 1100.29   30.50
  -5   0   1 1109.19   30.20
  -4   0   1   -0.70    0.30
  -4   0   1    0.30    0.30
  -3   0   1  390.76   10.60
  -3   0   1  377.16   10.80
  -2   0   1    0.40    0.20
  -2   0   1    0.40    0.20
  -1   0   1  807.92   22.60
  -1   0   1  858.11   22.70
   1   0  -1  856.11   22.60
   1   0  -1  857.91   22.60
  -1   0   1  837.32   22.60
  -1   0  -1 2402.16   66.79
   1   0   1 2532.15   66.59
  -1   0  -1 2477.45   66.69
   1   0   1 2484.85   66.89
  -2   0  -1   -0.30    0.20
  -2   0  -1    0.00    0.30
   2   0   1   -0.10    0.20
   2   0   1   -0.10    0.20
  -3   0  -1   11.30    0.80
  -3   0  -1   10.30    0.80
   3   0   1   10.20    0.70
   4   0   1   -0.10    0.30
  -4   0  -1    1.20    0.50
  -4   0  -1    0.10    0.30
  -5   0  -1   21.60    1.50
   5   0   1   20.90    1.10
  -6   0  -1    0.90    0.70
   6   0   1    0.20    0.30
  -7   0  -1   56.49    3.00
  -8   0  -1    0.40    0.80
  -9   0  -1   62.89    3.80
 -10   0  -1    1.70    1.20
 -11   0  -1   26.90    3.10
 -11  -1   1    3.30    1.60
 -11   1   1    3.60    1.50
 -10  -1   1   70.59    4.10
 -10   1   1   67.99    3.90
  -9  -1   1    9.80    1.80
  -9  -1   1    8.60    1.60
  -9   1   1    9.10    1.60
  -8  -1   1    3.50    1.10
  -8  -1   1    1.50    1.00
  -8   1   1    2.20    0.90
  -7  -1   1    5.10    1.10
  -7   1   1    4.20    0.90
  -6  -1   1   37.80    2.20
  -6   1   1   33.40    1.70
  -6   1   1   38.60    2.00
  -5  -1   1   20.50    1.50
  -5  -1   1   19.80    1.30
   5   1  -1   20.40    0.90
  -5   1   1   20.40    1.10
  -5   1   1   20.30    1.30
  -4  -1   1  601.94   16.80
  -4  -1   1  589.84   16.60
  -4   1   1  593.24   16.30
   4   1  -1  581.44   16.20
  -4   1   1  601.94   16.50
  -3  -1   1  517.05   14.20
  -3  -1   1  507.25   14.40
  -3   1   1  511.65   13.90
  -3   1   1  515.55   14.00
   3   1  -1  512.45   14.00
  -2  -1   1 9999.00  263.37
  -2  -1   1 9838.42  263.97
   2   1  -1 9674.93  263.07
   2   1  -1 9783.32  263.47
  -1  -1   1  182.88    5.10
  -1  -1   1  187.48    5.20
  -1  -1   1  174.18    5.10
   1   1  -1  181.18    5.10
   1   1  -1  178.78    5.10
   1   1  -1  181.78    5.20
   0  -1  -1  185.18    4.90
   0  -1   1  176.28    5.10
   0  -1  -1  170.18    4.90
   0  -1   1  179.68    5.00
   0   1   1  176.68    4.90
   0   1  -1  182.58    5.10
   0   1   1  182.08    4.90
   1  -1   1   99.79    2.90
  -1  -1  -1   98.79    3.00
   1  -1   1   99.09    3.00
  -1   1  -1   99.19    3.00
   1   1   1   99.99    3.00
   1   1   1   99.49    3.00
  -1   1  -1  101.89    2.90
   2  -1   1  361.26   10.10
  -2  -1  -1  372.56   10.40
   2  -1   1  359.36   10.20
  -2  -1  -1  381.06   10.30
  -2   1  -1  361.16   10.20
   2   1   1  371.96   10.40
   2   1   1  364.06   10.30
  -2   1  -1  377.66   10.20
  -3  -1  -1  427.56   12.20
   3  -1   1  434.66   11.70
   3  -1   1  423.36   11.70
  -3  -1  -1  422.86   12.00
   3   1   1  414.06   11.90
  -3   1  -1  430.86   12.00
  -3   1  -1  431.46   11.90
  -4  -1  -1   20.10    1.40
   4  -1   1   21.90    0.90
  -4   1  -1   23.00    1.30
  -4   1  -1   21.60    1.20
   4   1   1   21.40    1.20
  -5  -1  -1    3.80    0.80
  -5   1  -1    4.30    0.80
   5   1   1    2.90    0.60
  -5   1  -1    3.10    0.60
  -6  -1  -1  105.49    4.10
  -6   1  -1   97.59    3.90
   6   1   1   97.99    3.40
  -7  -1  -1   56.79    3.00
  -7   1  -1   55.79    2.90
  -8  -1  -1   30.20    2.50
  -8   1  -1   30.10    2.30
  -9  -1  -1    8.60    1.80
  -9   1  -1    8.00    1.60
 -10  -1  -1  111.89    5.40
 -10   1  -1  105.19    5.20
 -11  -1  -1    1.30    1.40
 -11   1  -1    4.90    1.60
 -11  -2   1   23.40    3.10
 -11   2   1   22.70    2.60
 -10  -2   1   -0.80    1.10
 -10   2   1    0.00    1.00
  -9  -2   1   51.69    3.40
  -9  -2   1   49.99    3.40
  -9   2   1   55.49    3.10
  -8  -2   1    3.00    1.20
  -8  -2   1    1.30    1.00
  -8   2   1    3.00    0.90
  -8   2   1    2.80    0.90
  -7  -2   1   27.80    2.10
  -7   2   1   24.80    1.70
  -6  -2   1    9.70    1.30
  -6   2   1    9.30    1.00
  -6   2   1   10.60    1.00
   6   2  -1    9.10    0.70
  -5  -2   1  761.82   21.50
   5   2  -1  764.12   20.70
  -5   2   1  738.13   20.80
  -5   2   1  755.62   20.70
  -4  -2   1  591.94   16.70
  -4  -2   1  592.34   16.60
  -4   2   1  593.54   15.90
  -4   2   1  562.94   15.80
   4   2  -1  573.54   16.10
  -3  -2   1  489.75   13.70
  -3  -2   1  475.55   13.50
   3   2  -1  473.25   13.30
  -2  -2   1  420.76   12.00
  -2  -2   1  429.36   11.80
   2   2  -1  419.66   11.80
  -1  -2   1 1704.63   44.20
  -1  -2   1 1672.43   44.50
   1   2  -1 1693.63   44.60
  -1   2   1 1402.66   44.00
   1   2  -1 1694.23   44.30
   1   2  -1 1695.63   44.40
   0  -2  -1  177.08    5.00
   0  -2  -1  184.68    5.00
   0  -2   1  181.08    5.20
   0  -2   1  183.78    5.10
   0   2  -1  178.28    5.20
   0   2   1  176.88    5.00
   0   2   1  175.88    5.00
   1  -2   1 1603.64   43.30
   1  -2   1 1571.04   43.30
  -1  -2  -1 1562.04   43.30
  -1  -2  -1 1612.64   43.30
  -1   2  -1 1640.74   43.20
   1   2   1 1649.33   43.30
   1   2   1 1618.24   43.50
  -1   2  -1 1622.54   43.40
   2  -2   1 2048.30   55.69
   2  -2   1 2090.59   55.79
  -2  -2  -1 2090.59   55.99
  -2   2  -1 2083.19   55.79
   2   2   1 2075.69   55.99
  -2   2  -1 2093.99   56.09
  -3  -2  -1 1124.99   31.00
   3   2   1 1122.59   30.80
  -3   2  -1 1125.79   30.60
  -3   2  -1 1150.28   30.60
  -4  -2  -1  140.39    4.80
  -4   2  -1  141.99    4.40
   4   2   1  136.19    4.50
  -4   2  -1  143.79    4.50
  -5  -2  -1  109.59    4.20
  -5   2  -1  108.39    3.80
  -5   2  -1  114.69    3.90
   5   2   1  114.99    3.90
  -6  -2  -1    3.80    1.00
  -6   2  -1    3.60    0.80
   6   2   1    3.40    0.70
  -6   2  -1    4.50    0.70
  -7  -2  -1  177.38    6.50
  -7   2  -1  177.88    6.20
   7   2   1  175.38    5.60
  -8  -2  -1    4.00    1.30
  -8   2  -1    5.00    1.20
  -9  -2  -1   33.80    2.90
  -9   2  -1   32.40    2.60
 -10  -2  -1   23.40    2.90
 -10   2  -1   22.50    2.60
 -11  -2  -1   11.00    2.10
 -11   2  -1    8.80    2.00
 -11  -3   1    1.70    1.50
 -11   3   1    1.40    1.20
 -10  -3   1   30.60    3.20
 -10   3   1   26.30    2.50
  -9  -3   1    8.60    1.80
  -9  -3   1   10.70    1.90
  -9   3   1   11.00    1.60
  -8  -3   1   35.60    2.60
  -8  -3   1   31.80    2.60
  -8   3   1   38.10    2.20
  -8   3   1   36.00    2.20
  -7  -3   1    2.90    1.00
  -7   3   1    2.30    0.70
   7   3  -1    3.10    0.60
  -6  -3   1  167.18    5.90
  -6   3   1  155.48    5.00
  -6   3   1  159.58    5.10
   6   3  -1  163.88    5.10
  -5  -3   1  209.28    7.00
   5   3  -1  209.28    6.40
  -5   3   1  210.38    6.10
  -5   3   1  201.88    6.00
  -4  -3   1   16.30    1.40
   4   3  -1   14.90    1.00
  -3  -3   1  167.88    5.40
   3   3  -1  161.28    5.10
  -2  -3   1  572.04   16.40
  -2  -3   1  608.64   16.50
  -2   3   1  599.74   16.10
   2   3  -1  581.24   16.40
  -1  -3   1 2732.73   69.29
   1  -3  -1 2468.15   68.99
  -1  -3   1 2574.64   69.19
  -1  -3   1 2562.14   69.29
   1   3  -1 2589.84   69.69
  -1   3   1 2403.36   69.29
   1   3  -1 2591.74   69.19
   1   3  -1 2701.43   69.29
   0  -3   1 1390.66   36.40
   0  -3   1 1329.17   36.40
   0  -3  -1 1362.36   36.20
   0  -3  -1 1335.57   36.20
   0  -3   1 1367.06   36.60
   0   3   1 1362.06   36.30
   0   3   1 1323.87   36.20
   0   3  -1 1320.97   36.40
  -1  -3  -1  667.23   18.30
  -1  -3  -1  673.53   18.20
   1  -3   1  661.33   17.90
   1  -3   1  679.43   18.00
  -1   3  -1  662.93   18.10
  -1   3  -1  659.23   18.00
   1   3   1  659.83   18.20
   1   3   1  641.64   18.20
  -2  -3  -1   92.89    3.30
  -2   3  -1   96.79    3.00
  -2   3  -1   92.09    2.90
   2   3   1   98.79    3.20
   3   3   1  275.37    8.00
  -3   3  -1  270.07    7.70
  -3   3  -1  267.47    7.70
  -4  -3  -1    0.80    0.60
   4   3   1    0.70    0.50
  -4   3  -1    0.70    0.30
  -4   3  -1   -0.40    0.30
  -5  -3  -1   85.19    3.60
  -5   3  -1   81.99    3.00
  -5   3  -1   75.89    2.90
   5   3   1   81.79    3.10
  -6  -3  -1  205.98    7.10
  -6   3  -1  196.08    6.50
   6   3   1  199.78    6.40
  -6   3  -1  204.38    6.30
  -7  -3  -1    3.00    1.10
   7   3   1    2.50    0.70
  -7   3  -1    2.60    0.80
  -8  -3  -1   16.30    2.10
  -8   3  -1   19.50    1.90
  -9  -3  -1   26.60    2.90
  -9   3  -1   32.10    2.50
 -10  -3  -1   50.59    3.80
 -10   3  -1   48.00    3.30
 -11  -3  -1    5.60    1.80
 -11   3  -1   10.00    2.00
 -11  -4   1   30.10    3.40
 -11   4   1   30.10    2.90
 -10  -4   1   -1.50    1.00
 -10   4   1    1.90    1.00
  -9  -4   1  135.09    6.20
  -9  -4   1  139.19    6.20
  -9   4   1  148.79    5.40
  -8  -4   1    5.10    1.40
  -8  -4   1    6.50    1.50
  -8   4   1    6.80    1.10
  -8   4   1    5.00    1.00
  -7  -4   1   77.59    4.00
   7   4  -1   92.99    3.30
  -7   4   1   87.79    3.30
  -6  -4   1  188.48    6.90
  -6   4   1  189.88    5.80
   6   4  -1  205.48    6.30
  -6   4   1  202.08    6.00
  -5  -4   1   31.80    2.10
  -5   4   1   30.90    1.20
  -5   4   1   27.30    1.10
   5   4  -1   32.10    1.70
  -4  -4   1 1091.69   30.30
   4   4  -1 1075.39   29.80
   3   4  -1  378.46   10.90
  -3   4   1  372.66   10.60
  -2  -4   1  797.42   22.40
  -2  -4   1  795.82   22.40
  -2   4   1  818.32   22.00
   2   4  -1  812.22   22.30
  -1  -4   1 2174.48   60.29
  -1  -4   1 2242.88   60.39
   1  -4  -1 2233.08   60.19
  -1   4   1 2231.78   59.79
   1   4  -1 2253.57   60.29
   1   4  -1 2220.78   60.39
  -1   4   1 2305.47   60.19
  -1   4   1 2238.08   59.79
   0  -4  -1   81.99    2.60
   0  -4   1   81.29    2.80
   0  -4  -1   78.99    2.80
   0  -4   1   85.69    2.80
   0  -4  -1   78.79    2.60
   0  -4   1   83.49    3.00
   0   4  -1   87.09    2.90
   0   4   1   84.89    2.70
   0   4  -1   80.59    2.80
   0   4  -1   84.29    3.00
   0   4   1   82.09    2.70
  -1  -4  -1 2604.14   71.29
   1  -4   1 2723.73   71.49
   1  -4   1 2602.04   71.29
  -1   4  -1 2676.33   71.09
   1   4   1 2656.53   71.29
   1   4   1 2635.54   71.29
  -1   4  -1 2664.13   71.29
  -2  -4  -1  814.22   23.10
  -2   4  -1  838.02   22.70
   2   4   1  846.12   23.00
  -2   4  -1  837.72   22.60
   3   4   1    1.60    0.50
  -3   4  -1    1.50    0.40
  -3   4  -1    1.90    0.40
  -4   4  -1  265.17    7.80
  -4   4  -1  280.27    7.80
   4   4   1  260.67    8.20
  -5  -4  -1  718.83   20.90
  -5   4  -1  726.23   20.10
  -5   4  -1  723.73   20.00
   5   4   1  720.33   20.40
  -6  -4  -1   14.70    1.80
   6   4   1   13.80    1.40
  -6   4  -1   14.50    1.30
  -6   4  -1   12.90    1.10
  -7  -4  -1   44.50    2.90
  -7   4  -1   50.69    2.50
   7   4   1   43.80    2.30
  -8  -4  -1    2.50    1.30
  -8   4  -1    3.00    1.00
  -9  -4  -1   86.09    4.80
  -9   4  -1   86.99    4.10
 -10  -4  -1    4.70    1.60
 -10   4  -1    3.30    1.30
 -11  -4  -1    3.30    1.70
 -11   4  -1    2.80    1.30
 -11  -5   1    5.70    1.90
 -11   5   1    7.40    1.60
 -10  -5   1    8.30    2.10
 -10   5   1   11.20    1.70
  -9  -5   1    3.60    1.50
  -9  -5   1    3.90    1.60
  -9   5   1    4.00    1.10
  -8  -5   1   89.29    4.60
  -8  -5   1   88.39    4.50
  -8   5   1   82.89    3.40
  -7  -5   1  103.29    4.70
   7   5  -1  104.59    3.90
  -7   5   1  106.89    3.70
  -6  -5   1  509.75   15.60
  -6   5   1  521.75   14.20
  -6   5   1  491.85   14.10
   6   5  -1  519.85   14.80
  -5  -5   1  162.28    5.90
   5   5  -1  153.18    5.30
   4   5  -1  346.27   10.30
  -3  -5   1    0.90    0.60
  -3  -5   1    1.60    0.60
   3   5  -1    0.80    0.50
  -3   5   1    0.40    0.40
  -2  -5   1 1029.10   27.90
   2   5  -1  998.80   27.70
  -2   5   1  986.40   27.50
  -1  -5   1    1.30    0.40
  -1  -5   1    0.10    0.30
   1  -5  -1    0.80    0.40
  -1   5   1   -0.20    0.20
   1   5  -1    4.00    0.70
  -1   5   1    0.50    0.40
  -1   5   1    0.10    0.20
   1   5  -1    0.50    0.40
   0  -5  -1  802.92   21.40
   0  -5   1  755.12   21.50
   0  -5   1  774.62   21.20
   0  -5  -1  759.12   21.00
   0   5  -1  761.02   21.30
   0   5  -1  784.92   21.30
   0   5  -1  783.02   21.50
   0   5   1  758.82   21.10
   0   5   1  756.52   21.10
   1  -5   1  575.44   15.80
   1  -5   1  564.94   15.80
  -1  -5  -1  576.14   16.20
  -1   5  -1  587.04   16.00
  -1   5  -1  593.24   16.40
  -1   5  -1  581.24   16.10
  -2  -5  -1 2475.75   65.79
  -2   5  -1 2510.05   65.29
  -2   5  -1 2446.96   65.39
   2   5   1 2295.17   65.59
  -3  -5  -1   12.40    1.30
  -3   5  -1   14.70    0.80
  -3   5  -1   14.00    0.90
  -4  -5  -1   14.70    1.50
  -4   5  -1   11.10    0.90
  -4   5  -1   11.80    0.90
  -7  -5  -1    6.10    1.40
   7   5   1    5.60    1.00
  -7   5  -1    6.10    1.00
  -8  -5  -1   15.60    2.20
  -8   5  -1   17.60    1.80
  -9  -5  -1   21.60    2.70
  -9   5  -1   25.00    2.30
 -10  -5  -1   49.40    3.80
 -10   5  -1   45.20    3.00
 -11  -5  -1    1.80    1.60
 -11   5  -1    4.40    1.40
 -11  -6   1   13.50    2.70
 -11   6   1    8.70    1.70
 -10  -6   1    5.00    1.80
 -10   6   1    5.90    1.30
  -9  -6   1   57.89    4.00
  -9   6   1   52.19    2.80
  -8  -6   1   71.49    4.10
  -8  -6   1   62.09    3.90
  -8   6   1   69.09    2.90
  -7  -6   1   63.19    3.60
  -7  -6   1   63.99    3.60
   7   6  -1   64.99    2.90
  -7   6   1   57.59    2.40
  -4  -6   1   62.59    3.10
  -4  -6   1   56.59    2.90
  -4   6   1   71.19    2.70
  -3  -6   1  289.47    9.50
  -3  -6   1  311.27    9.60
  -3   6   1  322.17    9.20
   1  -6  -1  259.87    7.90
  -1  -6   1  261.77    8.20
  -1  -6   1  263.77    8.00
  -1   6   1  264.37    7.50
  -1   6   1  260.77    7.90
  -1   6   1  267.97    7.50
   0  -6  -1   25.10    1.20
   0  -6   1   29.50    1.70
   0  -6  -1   27.80    1.60
   0  -6   1   25.00    1.30
   0   6   1   26.10    1.30
   0   6   1   24.50    1.30
   0   6   1   28.40    1.30
   0   6  -1   26.60    1.50
   0   6  -1   25.20    1.60
   0   6  -1   26.80    1.50
  -1  -6  -1   17.60    1.20
  -1   6  -1   15.50    1.00
  -1   6  -1   15.80    1.10
  -1   6  -1   17.50    1.30
  -2   6  -1    4.30    0.60
  -2   6  -1    4.40    0.80
  -2   6  -1    4.80    0.60
  -3  -6  -1 1426.76   39.50
   3   6   1 1450.05   39.30
  -3   6  -1 1410.46   38.60
  -3   6  -1 1433.16   38.70
  -4  -6  -1  234.38    7.80
   4   6   1  229.08    7.50
  -4   6  -1  231.78    7.00
  -4   6  -1  238.18    6.80
  -5  -6  -1  586.34   17.50
   5   6   1  579.34   17.00
  -5   6  -1  587.24   16.30
  -5   6  -1  586.14   16.40
  -6   6  -1    1.40    0.60
  -6   6  -1    1.30    0.60
   6   6   1    1.60    0.80
  -7  -6  -1   88.29    4.50
   7   6   1   88.99    3.80
  -7   6  -1   88.89    3.50
  -8  -6  -1    8.20    1.80
  -8   6  -1   10.90    1.40
  -9  -6  -1   18.60    2.60
  -9   6  -1   21.60    2.10
 -10  -6  -1    1.20    1.50
 -10   6  -1    1.10    1.00
 -11  -6  -1    4.80    1.90
 -11   6  -1    3.70    1.40
 -11  -7   1    0.20    1.60
 -11   7   1   -0.40    0.90
 -10  -7   1   21.80    3.00
 -10   7   1   21.80    2.00
  -9  -7   1   14.40    2.40
  -9   7   1   17.90    1.70
  -8  -7   1    0.50    1.10
  -8  -7   1   -0.80    1.00
  -8   7   1   -0.10    0.60
  -7  -7   1   68.29    4.00
  -7  -7   1   73.09    4.00
  -7   7   1   70.49    3.10
  -7   7   1   74.79    2.60
   7   7  -1   68.99    3.20
  -6   7   1  492.95   13.20
  -6   7   1  481.35   14.10
  -6   7   1  467.95   13.20
   6   7  -1  481.25   14.40
  -5  -7   1  378.06   12.70
  -5  -7   1  434.86   13.00
   5   7  -1  405.96   12.40
  -5   7   1  420.96   12.10
  -4  -7   1  287.27    9.30
  -4  -7   1  288.57    9.40
  -4   7   1  275.97    8.70
   4   7  -1  290.47    9.00
  -3  -7   1   63.69    3.00
  -3  -7   1   65.69    3.10
  -3   7   1   63.29    2.70
   3   7  -1   61.39    2.80
   2  -7  -1   98.39    3.60
  -2  -7   1   99.09    4.00
  -2  -7   1   94.99    3.80
  -2   7   1   98.49    3.00
  -2   7   1   98.49    3.00
  -2   7   1   97.29    3.60
   2   7  -1   99.09    3.70
  -1  -7   1 2390.46   65.39
   1  -7  -1 2461.95   65.49
  -1  -7   1 2375.96   65.69
  -1   7   1 2375.56   65.39
  -1   7   1 2352.86   64.89
  -1   7   1 2530.35   64.99
   0  -7  -1  192.38    6.30
   0  -7   1  190.68    6.40
   0  -7  -1  200.38    5.90
   0  -7   1  191.78    6.00
   0   7  -1  203.28    6.20
   0   7   1  188.98    6.00
   0   7  -1  184.98    6.40
   0   7   1  191.48    6.00
   0   7   1  199.08    6.00
   1  -7   1  244.98    7.60
   1  -7   1  231.28    6.80
   1  -7   1  234.78    6.80
  -1  -7  -1  241.88    7.60
  -1  -7  -1  229.68    7.30
  -1   7  -1  239.38    7.60
  -1   7  -1  239.48    7.20
  -1   7  -1  231.38    7.20
  -2   7  -1   10.10    1.20
  -2   7  -1   10.40    1.00
  -2   7  -1   11.80    0.90
   2   7   1    8.50    1.10
  -3  -7  -1  373.56   11.70
  -3   7  -1  386.76   10.90
   3   7   1  383.76   11.60
  -3   7  -1  384.66   11.00
  -3   7  -1  397.96   11.70
  -4  -7  -1    7.30    1.30
   4   7   1    7.10    1.10
  -4   7  -1    7.90    0.90
  -4   7  -1    8.50    0.80
  -5  -7  -1  159.88    6.10
   5   7   1  156.98    5.70
  -5   7  -1  159.18    5.10
  -5   7  -1  161.38    5.00
  -6  -7  -1  234.88    8.90
  -6   7  -1  259.37    7.90
  -6   7  -1  260.17    7.80
   6   7   1  270.17    8.50
  -7  -7  -1    0.10    1.10
   7   7   1    0.10    0.80
  -7   7  -1    1.50    0.70
  -8  -7  -1    5.90    1.70
  -8   7  -1    6.30    1.10
  -9  -7  -1   41.60    3.60
  -9   7  -1   44.10    2.70
 -10  -7  -1   48.10    4.00
 -10   7  -1   46.10    3.00
 -11  -7  -1    1.40    1.80
 -11   7  -1   -0.60    1.00
 -10  -8   1    8.50    2.20
 -10   8   1    8.80    1.40
  -9  -8   1   86.29    5.10
  -9   8   1   80.99    3.40
  -8  -8   1    3.10    1.50
  -8  -8   1    3.40    1.50
  -8   8   1    5.10    0.90
  -7  -8   1   84.89    4.50
  -7  -8   1   86.49    4.50
   7   8  -1   83.89    3.80
  -7   8   1   83.89    2.90
  -7   8   1   82.19    3.50
  -6  -8   1  154.68    6.40
  -6  -8   1  158.68    6.40
   6   8  -1  161.28    5.80
  -6   8   1  157.98    5.50
  -5  -8   1   53.09    3.20
   5   8  -1   61.79    3.10
  -5   8   1   60.29    2.80
  -4  -8   1   14.40    1.70
  -4  -8   1   12.70    1.60
  -4   8   1   14.50    1.40
   4   8  -1   15.20    1.60
  -3  -8   1  851.91   24.80
  -3  -8   1  867.61   24.60
  -3   8   1  868.71   24.30
  -3   8   1  873.61   23.20
  -3   8   1  848.52   23.20
   3   8  -1  872.41   24.50
  -2  -8   1   93.99    3.70
   2  -8  -1   88.69    3.60
  -2  -8   1   89.69    3.90
   2   8  -1   93.19    3.70
  -2   8   1   94.09    3.60
  -2   8   1   91.99    3.00
  -2   8   1   93.09    3.00
   1  -8  -1  566.44   16.30
  -1  -8   1  549.25   16.10
  -1  -8   1  555.54   16.50
  -1   8   1  566.14   16.30
  -1   8   1  561.04   15.70
  -1   8   1  572.24   15.80
  -1   8   1  564.14   15.80
   0  -8   1   21.70    1.60
   0  -8  -1   22.60    1.60
   0  -8   1   17.30    1.20
   0  -8  -1   18.10    1.20
   0   8  -1   21.60    1.70
   0   8   1   18.50    1.30
   0   8  -1   20.60    1.50
  -1  -8  -1   19.40    1.60
  -1  -8  -1   13.70    1.30
   1  -8   1   18.40    1.50
   1  -8   1   15.00    1.00
  -1   8  -1   17.70    1.50
   1   8   1   16.60    1.30
  -1   8  -1   14.80    1.20
  -1   8  -1   15.10    1.20
  -2  -8  -1  208.38    7.20
  -2  -8  -1  228.88    7.60
   2   8   1  223.28    7.20
  -2   8  -1  232.08    7.50
  -2   8  -1  215.38    6.80
  -2   8  -1  230.98    6.90
  -3  -8  -1  389.86   11.90
  -3   8  -1  382.56   11.80
  -3   8  -1  381.36   11.20
  -3   8  -1  395.66   11.10
   3   8   1  383.46   11.80
  -4  -8  -1  290.47    9.50
  -4   8  -1  291.97    9.30
   4   8   1  287.47    9.20
  -4   8  -1  283.97    8.60
  -4   8  -1  285.57    8.40
  -5  -8  -1  156.68    6.10
  -5   8  -1  158.38    5.20
  -5   8  -1  161.38    5.00
  -5   8  -1  154.08    5.80
   5   8   1  149.79    5.70
  -6  -8  -1   19.50    2.30
   6   8   1   18.00    1.90
  -6   8  -1   18.60    1.40
  -7  -8  -1   51.29    3.50
   7   8   1   51.69    3.00
  -7   8  -1   51.89    2.50
  -8  -8  -1   42.50    3.50
  -8   8  -1   42.00    2.40
  -9  -8  -1   25.60    3.20
  -9   8  -1   22.10    1.90
 -10  -8  -1    2.40    1.60
 -10   8  -1    2.00    1.10
 -10  -9   1   50.89    4.30
  -9  -9   1    2.40    1.50
  -9   9   1    1.70    0.80
  -8  -9   1   17.00    2.50
  -8  -9   1   15.60    2.40
  -8   9   1   17.20    1.30
  -7  -9   1    0.60    1.20
  -7  -9   1   -0.10    1.10
  -7   9   1    0.40    0.50
  -7   9   1    0.30    0.70
   7   9  -1    0.50    0.80
  -6  -9   1   89.19    4.50
  -6  -9   1   89.79    4.50
  -6   9   1   85.29    2.80
   6   9  -1   87.19    4.10
  -6   9   1   92.39    3.80
  -5  -9   1   17.40    2.10
  -5   9   1   14.80    1.50
   5   9  -1   15.50    1.80
  -4  -9   1  405.76   12.50
  -4   9   1  414.66   10.80
   4   9  -1  388.06   12.20
  -4   9   1  388.46   10.80
  -4   9   1  377.86   10.80
  -4   9   1  405.76   12.00
  -3  -9   1    4.40    1.00
  -3  -9   1    6.60    1.20
  -3   9   1    6.00    1.00
   3   9  -1    5.00    1.00
  -3   9   1    7.60    0.70
  -3   9   1    5.60    0.60
  -3   9   1    7.40    0.60
  -2  -9   1  191.48    6.60
   2  -9  -1  194.38    6.50
  -2  -9   1  184.68    6.80
  -2   9   1  191.98    5.90
   2   9  -1  189.48    6.60
  -2   9   1  193.28    5.80
  -2   9   1  196.88    5.90
  -2   9   1  200.18    6.60
  -1  -9   1   19.00    1.40
   1  -9  -1   20.10    0.70
  -1  -9   1   20.50    1.70
   1  -9  -1   22.50    1.60
  -1   9   1   18.90    1.30
  -1   9   1   20.60    1.40
   1   9  -1   18.10    1.60
  -1   9   1   16.80    1.20
   0  -9   1  712.73   20.60
   0  -9  -1  728.43   20.40
   0  -9   1  744.93   21.30
   0  -9  -1  737.63   21.20
   0  -9   1  740.73   20.60
   0   9  -1  748.53   21.40
   0   9   1  727.53   20.70
   0   9  -1  739.23   20.90
  -1  -9  -1  254.87    8.60
   1  -9   1  265.57    8.70
   1  -9   1  263.07    7.70
  -1  -9  -1  260.07    8.20
  -1   9  -1  261.37    8.70
  -1   9  -1  275.57    8.20
   1   9   1  262.17    8.30
  -2  -9  -1  573.04   16.80
  -2  -9  -1  574.84   17.20
   2   9   1  576.74   16.80
  -2   9  -1  567.14   16.40
  -2   9  -1  588.64   17.10
  -2   9  -1  568.14   16.40
  -3  -9  -1   88.09    3.90
   3   9   1   90.79    3.80
  -3   9  -1   86.59    3.20
  -3   9  -1   84.59    3.30
  -3   9  -1   86.99    3.90
  -4  -9  -1  103.59    4.50
  -4   9  -1  106.09    4.40
  -4   9  -1  102.49    3.70
  -4   9  -1  107.09    3.60
   4   9   1  102.19    4.30
  -5  -9  -1   85.09    4.20
  -5   9  -1   78.29    3.80
  -5   9  -1   86.99    3.10
  -5   9  -1   80.29    3.20
   5   9   1   86.69    3.90
  -6  -9  -1   16.60    2.20
  -6   9  -1   13.90    1.80
  -6   9  -1   14.40    1.20
   6   9   1   14.70    1.90
  -7  -9  -1    7.10    1.70
  -7   9  -1   11.10    1.20
   7   9   1    6.60    1.40
  -7   9  -1    6.10    1.30
  -8  -9  -1   53.59    3.90
  -8   9  -1   50.79    3.20
  -8   9  -1   53.59    2.70
  -9  -9  -1   12.20    2.40
  -9   9  -1    6.70    1.30
 -10  -9  -1   24.90    3.30
 -10   9  -1   26.00    2.40
 -10 -10   1    0.20    1.50
  -9 -10   1   64.89    4.60
  -8 -10   1    2.90    1.60
  -8  10   1    6.50    0.90
  -7 -10   1  171.98    7.30
  -7 -10   1  173.98    7.30
   7  10  -1  175.58    6.60
  -7  10   1  170.18    6.10
  -7  10   1  167.88    5.20
  -6 -10   1    1.20    1.10
  -6 -10   1    0.60    1.10
   6  10  -1    0.20    0.90
  -6  10   1    0.60    0.40
  -6  10   1    0.30    0.70
  -5 -10   1   37.80    2.80
  -5 -10   1   38.10    2.80
   5  10  -1   39.40    2.60
  -5  10   1   40.70    2.40
  -5  10   1   40.40    1.50
  -5  10   1   36.30    1.50
  -4 -10   1   58.39    3.20
  -4 -10   1   55.29    3.20
  -4  10   1   48.70    2.70
   4  10  -1   57.29    3.10
  -4  10   1   53.59    2.00
  -4  10   1   57.99    2.00
  -3 -10   1    1.50    0.90
  -3 -10   1    0.70    0.80
  -3  10   1    3.30    0.90
  -3  10   1    2.30    0.50
  -3  10   1    2.10    0.50
   3  10  -1    1.30    0.80
   2 -10  -1   53.99    2.80
  -2 -10   1   55.09    2.80
  -2 -10   1   57.99    2.90
  -2 -10   1   56.49    3.10
   2  10  -1   57.29    2.90
  -2  10   1   56.59    2.40
  -2  10   1   57.59    2.90
  -2  10   1   60.09    2.40
   1 -10  -1  213.28    5.80
   1 -10  -1  212.38    7.20
  -1 -10   1  184.18    7.20
   1  10  -1  209.98    7.40
  -1  10   1  214.08    6.60
  -1  10   1  209.88    6.70
   0 -10   1    4.30    0.80
   0 -10   1    5.60    0.90
   0 -10  -1    5.70    1.10
   0 -10   1    5.40    1.10
   0 -10  -1    3.30    0.70
   0  10  -1    5.60    1.20
   0  10  -1    4.40    1.00
   0  10   1    4.10    0.90
   1 -10   1   92.49    3.20
   1 -10   1   97.09    4.10
  -1 -10  -1   83.79    3.90
  -1 -10  -1   90.39    3.60
   1  10   1   89.39    3.70
  -1  10  -1   88.49    3.60
  -1  10  -1   90.89    4.00
  -2 -10  -1    0.20    0.70
  -2  10  -1   -0.20    0.40
  -2  10  -1   -0.20    0.60
   2  10   1    0.40    0.70
  -2  10  -1    0.20    0.50
  -3 -10  -1  507.25   15.80
   3  10   1  526.55   15.70
  -3  10  -1  505.15   15.10
  -3  10  -1  530.75   15.10
  -3  10  -1  548.35   16.00
  -4 -10  -1   49.00    3.10
  -4  10  -1   51.59    2.40
   4  10   1   53.49    2.90
  -4  10  -1   50.89    3.00
  -4  10  -1   52.29    2.30
  -5 -10  -1  236.78    8.70
   5  10   1  246.88    8.40
  -5  10  -1  245.28    7.40
  -5  10  -1  235.28    8.30
  -6 -10  -1    2.20    1.30
   6  10   1    6.60    1.40
  -6  10  -1    6.40    1.30
  -6  10  -1    5.40    0.90
  -7 -10  -1    1.90    1.50
   7  10   1    1.80    1.10
  -7  10  -1    2.60    1.10
  -7  10  -1    4.40    0.90
  -8 -10  -1    0.80    1.40
  -8  10  -1    0.50    0.70
   8  10   1    0.30    0.90
  -9 -10  -1    0.70    1.50
  -9  10  -1    0.60    0.90
 -10 -10  -1    0.00    1.60
 -10  10  -1   -0.70    0.80
 -10 -11   1   64.09    4.90
  -9 -11   1    0.90    1.60
  -8 -11   1    2.50    1.60
  -8  11   1    5.70    0.90
  -7 -11   1    8.70    1.90
  -7 -11   1    5.60    1.80
   7  11  -1   12.30    1.90
  -7  11   1    8.70    0.90
  -6 -11   1  370.66   12.40
  -6 -11   1  358.16   12.40
   6  11  -1  370.06   11.90
  -6  11   1  346.47   10.20
  -6  11   1  369.56   11.50
  -5 -11   1    3.50    1.30
  -5 -11   1    3.40    1.30
   5  11  -1    2.90    1.10
  -5  11   1    5.80    1.20
  -5  11   1    3.80    0.60
  -4 -11   1  124.49    5.40
  -4 -11   1  129.79    5.40
  -4  11   1  128.19    4.10
  -4  11   1  120.69    4.10
   4  11  -1  129.19    5.20
  -4  11   1  129.49    5.00
  -3 -11   1  209.28    7.50
  -3 -11   1  214.68    7.50
  -3  11   1  212.68    6.50
  -3  11   1  204.28    7.30
  -3  11   1  208.48    6.50
   3  11  -1  207.68    7.40
  -2 -11   1  340.67   10.70
   2 -11  -1  333.17   10.80
  -2 -11   1  334.97   10.70
   2  11  -1  343.07   10.80
  -2  11   1  342.47   10.80
  -2  11   1  343.77   10.10
  -2  11   1  322.37   10.00
   0 -11  -1    4.20    0.70
   0 -11   1    5.40    1.20
   0 -11  -1    2.80    0.90
   0 -11   1    4.90    0.90
   0  11  -1    2.10    0.80
   0  11  -1    3.10    1.00
   0  11   1    5.10    1.00
   1 -11   1   11.90    1.10
   1 -11   1   10.20    1.50
  -1 -11  -1   11.90    1.30
  -1  11  -1   10.50    1.60
   1  11   1   13.00    1.50
  -1  11  -1    8.90    1.30
  -2 -11  -1  495.15   14.80
  -2  11  -1  492.85   15.20
   2  11   1  494.05   14.90
  -2  11  -1  486.75   14.50
  -3 -11  -1   13.20    1.70
  -3  11  -1   11.00    1.30
   3  11   1    9.10    1.40
  -3  11  -1    9.50    1.20
  -3  11  -1   12.60    1.70
  -4 -11  -1   14.30    1.90
  -4  11  -1   16.10    1.40
  -4  11  -1   16.90    1.90
  -4  11  -1   19.00    1.40
   4  11   1   16.20    1.90
  -5 -11  -1    1.10    1.20
  -5  11  -1    1.90    0.70
  -5  11  -1    1.40    1.00
   5  11   1    1.90    1.00
  -6 -11  -1  106.39    5.40
   6  11   1  117.29    5.10
  -6  11  -1  112.29    4.10
  -6  11  -1  105.99    4.90
  -7 -11  -1   -0.80    1.20
  -7  11  -1    0.50    0.90
  -7  11  -1    0.20    0.60
   7  11   1    0.50    1.00
  -8 -11  -1    1.10    1.50
   8  11   1    3.50    1.20
  -8  11  -1    3.80    1.00
  -9 -11  -1    6.00    2.00
  -9  11  -1    5.70    1.20
 -10 -11  -1   18.30    3.10
 -10  11  -1   12.70    1.70
  -9 -12   1  101.59    5.90
  -8 -12   1    5.40    2.00
  -7 -12   1  125.19    6.20
   7  12  -1  130.79    5.60
  -7  12   1  125.19    4.20
  -6 -12   1  102.69    5.20
  -6 -12   1  106.89    5.30
   6  12  -1  100.19    4.80
  -6  12   1   96.39    3.50
  -6  12   1   98.29    4.40
  -5 -12   1   30.20    3.00
  -5 -12   1   38.00    3.00
  -5  12   1   38.40    2.50
  -5  12   1   35.20    1.80
   5  12  -1   41.70    2.80
  -4 -12   1  119.99    5.40
  -4 -12   1  130.09    5.50
  -4  12   1  121.49    5.10
   4  12  -1  125.89    5.40
  -4  12   1  129.19    4.30
  -3 -12   1    4.80    1.30
  -3 -12   1    7.60    1.50
  -3  12   1    4.20    1.10
  -3  12   1    5.90    0.90
   3  12  -1    5.20    1.20
  -3  12   1    5.90    0.90
  -2 -12   1   40.80    2.50
   2 -12  -1   45.20    2.70
  -2 -12   1   41.80    2.60
  -2  12   1   40.70    2.20
  -2  12   1   40.70    2.70
  -2  12   1   42.50    2.20
   2  12  -1   39.00    2.60
  -1 -12   1   86.19    3.60
   0 -12   1   70.09    3.00
   0 -12  -1   73.39    2.90
   0  12   1   68.89    3.30
   0  12  -1   66.39    3.70
   0  12  -1   73.49    3.40
  -1 -12  -1  400.76   12.00
   1 -12   1  399.86   11.50
  -1  12  -1  390.96   12.20
  -1  12  -1  398.26   12.80
  -2 -12  -1   15.30    1.70
  -2  12  -1   17.20    2.10
  -2  12  -1   17.90    1.70
  -3 -12  -1  106.09    4.60
  -3  12  -1  111.89    4.90
  -3  12  -1  101.19    4.10
   3  12   1  102.49    4.60
  -4 -12  -1   24.70    2.50
   4  12   1   24.80    2.50
  -4  12  -1   23.10    1.70
  -4  12  -1   25.40    2.50
  -5 -12  -1  160.38    6.60
  -5  12  -1  151.48    5.40
  -5  12  -1  155.08    6.30
   5  12   1  157.08    6.30
  -6 -12  -1    9.30    1.90
   6  12   1    8.00    1.70
  -6  12  -1   12.30    1.90
  -6  12  -1    9.60    1.20
  -7 -12  -1   34.90    3.60
   7  12   1   28.10    2.90
  -7  12  -1   25.70    2.70
  -7  12  -1   29.80    2.00
  -8 -12  -1   35.00    3.90
   8  12   1   36.90    3.00
  -8  12  -1   35.40    2.30
  -9 -12  -1    5.00    2.00
  -9  12  -1    9.10    1.40
  -9 -13   1   10.40    2.50
  -8 -13   1   33.10    3.80
  -7 -13   1    0.40    1.50
  -7  13   1    1.10    0.60
   7  13  -1    0.40    1.10
  -6 -13   1   34.70    3.50
   6  13  -1   33.30    2.80
  -6  13   1   33.40    1.80
  -6  13   1   34.30    2.50
  -5 -13   1    7.20    1.80
  -5 -13   1    8.80    1.80
  -5  13   1    7.50    1.40
   5  13  -1    4.60    1.40
  -5  13   1    7.80    1.10
  -4 -13   1   13.90    2.00
  -4 -13   1   18.60    2.40
   4  13  -1   15.60    2.10
  -4  13   1   14.60    1.40
  -4  13   1   15.80    2.00
  -3 -13   1  349.27   11.50
  -3 -13   1  355.56   11.60
   3  13  -1  358.56   11.70
  -3  13   1  350.96   11.50
  -3  13   1  351.96   10.70
  -2 -13   1   93.99    4.20
   2  13  -1   87.09    4.30
  -2  13   1  101.49    4.00
  -1 -13   1   38.90    2.30
   1 -13  -1   37.40    1.30
  -1  13   1   41.70    2.40
   0 -13   1  233.38    7.40
   0 -13  -1  227.38    7.20
   0  13   1  224.08    7.80
   0  13  -1  229.28    8.40
   0  13  -1  226.38    7.90
   1 -13   1    0.70    0.50
  -1 -13  -1    0.40    0.60
  -1  13  -1   -0.90    0.70
   1  13   1    0.10    0.30
  -1  13  -1    0.60    0.80
  -2 -13  -1   75.49    3.70
  -2  13  -1   85.29    3.70
  -2  13  -1   84.09    4.20
  -3 -13  -1   13.70    1.90
  -3  13  -1   15.50    1.70
   3  13   1   13.20    1.90
  -3  13  -1   15.30    2.00
  -4 -13  -1   81.39    4.20
  -4  13  -1   83.39    3.60
   4  13   1   79.49    4.20
  -4  13  -1   70.89    4.00
  -5 -13  -1   34.80    3.00
  -5  13  -1   29.70    2.10
  -5  13  -1   34.20    2.70
   5  13   1   24.10    2.60
  -6 -13  -1   55.59    3.90
   6  13   1   54.49    3.60
  -6  13  -1   52.39    3.40
  -6  13  -1   52.19    2.70
  -7 -13  -1   -0.20    1.30
  -7  13  -1    0.70    0.70
   7  13   1    1.40    1.20
  -7  13  -1    0.90    1.00
  -8 -13  -1   27.60    3.50
  -8  13  -1   30.80    2.20
   8  13   1   27.50    3.00
  -9 -13  -1   13.70    2.70
  -9  13  -1    9.30    1.50
  -9 -14   1   36.20    4.20
  -8 -14   1    2.70    1.80
  -7 -14   1   27.80    3.40
  -7  14   1   21.90    1.60
   7  14  -1   25.80    2.80
  -6 -14   1   50.89    3.90
   6  14  -1   57.79    3.70
  -6  14   1   55.49    2.60
  -6  14   1   50.69    3.30
  -5 -14   1   85.69    4.70
  -5  14   1   78.29    3.40
  -5  14   1   83.09    4.20
   5  14  -1   84.89    4.50
  -4 -14   1   -0.80    1.00
   4  14  -1   -0.50    0.90
  -4  14   1   -0.90    0.80
  -4  14   1    0.50    0.70
  -3 -14   1   14.60    2.00
   3  14  -1   13.70    2.00
  -3  14   1   13.60    1.50
  -3  14   1   14.30    1.90
  -2 -14   1   80.29    3.90
  -2  14   1   83.29    3.60
   2  14  -1   74.89    4.00
  -1 -14   1   -0.20    0.70
   1  14  -1    0.30    0.50
  -1  14   1   -0.60    0.60
   0 -14  -1   10.40    1.20
   0 -14   1    9.20    1.20
   0  14  -1    7.20    1.40
   0  14   1    6.80    1.30
   0  14  -1    8.40    1.60
   1 -14   1  143.49    4.80
  -1 -14  -1  148.49    5.50
  -1  14  -1  152.48    6.40
  -1  14  -1  158.18    5.90
   1  14   1  139.49    5.80
  -2 -14  -1   55.79    3.10
  -2  14  -1   60.19    3.60
  -2  14  -1   58.89    3.10
   2  14   1   53.39    3.20
  -3 -14  -1   82.49    4.10
  -3  14  -1   75.89    4.20
  -3  14  -1   76.09    3.60
   3  14   1   70.79    3.90
  -4 -14  -1   39.40    3.10
   4  14   1   35.30    2.90
  -4  14  -1   37.90    2.40
  -4  14  -1   34.80    2.90
  -5 -14  -1  169.98    7.10
  -5  14  -1  156.58    5.90
   5  14   1  162.38    6.80
  -5  14  -1  163.08    6.80
  -6 -14  -1    4.80    1.70
  -6  14  -1    7.60    1.70
  -6  14  -1    6.50    1.20
   6  14   1    9.50    1.90
  -7 -14  -1   22.90    3.10
  -7  14  -1   24.20    2.00
   7  14   1   26.00    2.90
  -8 -14  -1   13.60    2.70
   8  14   1   14.00    2.30
  -8  14  -1   11.30    1.60
  -9 -14  -1   18.60    3.20
  -9  14  -1   21.10    2.10
  -8 -15   1   60.19    4.80
  -7 -15   1    1.00    1.50
  -7  15   1    0.60    0.70
   7  15  -1   -1.00    1.10
  -6 -15   1   20.70    3.00
  -6  15   1   19.00    1.70
   6  15  -1   14.30    2.20
  -5 -15   1    0.30    1.30
  -5  15   1    0.60    0.70
  -5  15   1    1.10    1.10
   5  15  -1    0.60    1.10
  -4 -15   1   89.69    4.70
  -4  15   1   89.39    4.60
  -4  15   1   93.29    3.90
   4  15  -1   85.19    4.60
  -3 -15   1   61.89    3.70
  -3  15   1   64.59    3.20
   3  15  -1   66.39    3.90
  -2 -15   1   28.30    2.30
   2  15  -1   24.30    2.60
  -2  15   1   23.40    2.00
  -1 -15   1   -0.30    0.70
   1  15  -1   -0.40    0.90
  -1  15   1   -1.00    0.70
   0 -15   1   48.10    2.50
   0 -15  -1   39.80    2.10
   0  15  -1   44.50    3.00
   0  15   1   45.30    2.90
  -1 -15  -1   73.29    3.40
  -1  15  -1   66.09    3.60
  -1  15  -1   70.09    4.00
   1  15   1   68.39    3.70
  -2 -15  -1    7.70    1.40
  -2  15  -1    5.50    1.20
  -2  15  -1    8.90    1.70
   2  15   1    6.50    1.50
  -3 -15  -1   34.10    2.70
  -3  15  -1   36.50    2.50
   3  15   1   31.70    2.70
  -3  15  -1   33.80    2.90
  -4 -15  -1   28.10    2.80
  -4  15  -1   26.30    2.20
   4  15   1   26.40    2.80
  -4  15  -1   30.30    3.00
  -5 -15  -1    1.30    1.30
  -5  15  -1    1.00    1.20
  -5  15  -1    0.20    0.80
   5  15   1    0.70    1.10
  -6 -15  -1   73.99    4.60
  -6  15  -1   63.49    3.40
   6  15   1   65.59    4.10
  -6  15  -1   74.49    4.30
  -7 -15  -1   28.10    3.40
   7  15   1   22.70    2.80
  -7  15  -1   27.70    2.30
  -8 -15  -1   21.70    3.20
  -8  15  -1   24.20    2.30
   8  15   1   26.60    3.10
  -8 -16   1   -2.10    1.40
  -7 -16   1   -0.30    1.50
  -7  16   1    1.60    0.80
   7  16  -1    0.60    1.30
  -6 -16   1    1.00    1.50
   6  16  -1   -0.50    1.10
  -6  16   1    0.40    0.80
  -5 -16   1  123.99    6.00
  -5  16   1  108.19    5.30
   5  16  -1  117.89    5.70
  -5  16   1  116.29    4.70
  -4 -16   1   -0.80    1.10
   4  16  -1   -0.10    1.20
  -4  16   1   -0.40    0.70
  -3 -16   1   53.39    3.50
  -3  16   1   53.39    3.10
   3  16  -1   64.09    3.80
  -2 -16   1    3.50    1.30
  -2  16   1    8.10    1.50
   2  16  -1    6.30    1.60
  -1 -16   1   46.90    2.90
   1  16  -1   47.20    3.20
  -1  16   1   51.19    3.10
   0  16  -1   19.10    2.30
   0  16   1   15.50    2.00
  -1 -16  -1    3.30    1.00
  -1  16  -1    3.80    1.30
  -1  16  -1    3.50    1.40
   1  16   1    3.10    1.20
  -2 -16  -1    2.50    1.10
  -2  16  -1   -1.00    0.80
  -2  16  -1    1.60    1.00
   2  16   1   -0.50    1.00
  -3 -16  -1   17.90    2.20
   3  16   1   28.90    3.00
  -3  16  -1   25.90    2.50
  -3  16  -1   25.30    2.90
  -4 -16  -1    2.90    1.40
  -4  16  -1    2.70    1.30
   4  16   1    2.70    1.40
  -4  16  -1    2.30    1.10
  -5 -16  -1   61.59    4.20
  -5  16  -1   65.89    4.20
   5  16   1   63.69    4.10
  -5  16  -1   59.09    3.40
  -6 -16  -1    6.90    1.90
  -6  16  -1    6.90    1.80
  -6  16  -1    7.00    1.40
   6  16   1    5.20    1.70
  -7 -16  -1   21.80    3.10
   7  16   1   22.20    2.80
  -7  16  -1   19.20    2.20
  -8 -16  -1   -0.50    1.60
  -8  16  -1    1.30    1.00
   8  16   1   -0.10    1.30
  -7 -17   1    0.00    1.70
   7  17  -1    1.70    1.50
  -7  17   1    3.20    1.00
  -6 -17   1   -0.90    1.30
   6  17  -1    2.00    1.40
  -6  17   1    0.10    0.80
  -5 -17   1   24.30    3.00
   5  17  -1   26.10    3.10
  -5  17   1   26.80    2.20
  -4 -17   1   19.10    2.60
  -4  17   1   14.30    1.90
   4  17  -1   22.40    2.90
  -3 -17   1    0.50    1.10
   3  17  -1   -0.60    1.00
  -3  17   1    0.70    0.90
  -2 -17   1  322.97   10.90
  -2  17   1  327.57   10.80
   2  17  -1  315.87   11.30
  -1  17   1   21.70    2.40
   1  17  -1   23.30    2.70
   0  17   1    7.00    1.50
   0  17  -1    9.20    1.80
  -1  17  -1    1.80    1.20
   1  17   1    2.30    1.30
  -2 -17  -1  112.99    5.00
   2  17   1  105.39    5.30
  -2  17  -1  116.29    5.20
  -2  17  -1  108.79    5.70
  -3 -17  -1    0.10    1.10
  -3  17  -1   -0.60    1.00
   3  17   1   -0.20    1.10
  -3  17  -1    0.20    1.00
  -4 -17  -1    0.30    1.00
  -4  17  -1    1.90    1.30
   4  17   1   -0.20    1.10
  -4  17  -1   -0.70    0.80
  -5 -17  -1    4.50    1.60
   5  17   1    5.60    1.80
  -5  17  -1    5.50    1.70
  -5  17  -1    8.10    1.50
  -6 -17  -1    8.60    2.20
  -6  17  -1    5.70    1.70
   6  17   1    8.10    2.00
  -6  17  -1    9.80    1.70
  -7 -17  -1   -0.20    1.50
  -7  17  -1   -0.10    0.90
   7  17   1    1.50    1.40
  -7 -18   1    7.20    2.30
   7  18  -1    4.10    1.80
  -6 -18   1    0.00    1.40
   6  18  -1   -0.40    1.30
  -6  18   1    0.70    0.90
  -5 -18   1   38.60    3.80
   5  18  -1   47.10    3.70
  -5  18   1   37.80    2.80
  -4 -18   1   46.20    3.50
   4  18  -1   46.40    3.70
  -4  18   1   46.30    3.00
  -3 -18   1   33.50    3.20
   3  18  -1   31.30    3.40
  -3  18   1   30.50    2.50
   2  18  -1    8.30    1.90
  -2  18   1    8.50    1.60
  -1  18   1   71.49    4.00
   1  18  -1   65.09    4.10
   0  18   1    8.10    1.80
   0  18  -1    9.70    1.90
   1  18   1   49.00    3.50
  -1  18  -1   55.99    3.60
  -2  18  -1   14.30    2.10
  -2  18  -1   14.10    2.30
   2  18   1   19.40    2.60
  -3 -18  -1   15.80    2.20
  -3  18  -1   18.50    2.30
   3  18   1   18.40    2.60
  -3  18  -1   17.10    2.60
  -4 -18  -1   14.70    2.30
  -4  18  -1   13.00    2.30
  -4  18  -1   16.80    2.20
   4  18   1   13.80    2.50
  -5 -18  -1    4.20    1.60
  -5  18  -1    6.00    1.70
  -5  18  -1    7.20    1.60
   5  18   1    4.60    1.80
  -6 -18  -1    0.20    1.40
  -6  18  -1   -0.30    0.90
   6  18   1   -0.40    1.30
  -7 -18  -1   17.20    3.00
  -7  18  -1   15.30    2.10
   7  18   1   14.90    2.60
  -6 -19   1    3.40    1.90
  -6  19   1    3.40    1.30
   6  19  -1    6.10    2.10
  -5 -19   1   12.10    2.40
  -5  19   1   13.20    1.90
   5  19  -1   10.20    2.40
  -4 -19   1   12.30    2.20
   4  19  -1    7.50    1.90
  -4  19   1   10.70    1.80
  -3  19   1    6.90    1.60
   3  19  -1    6.30    1.90
  -2  19   1  106.29    5.10
   2  19  -1  107.89    5.60
   1  19  -1   37.40    3.60
  -1  19   1   36.60    3.00
   0  19  -1   42.10    3.40
   0  19   1   49.90    3.50
   1  19   1    6.60    1.80
  -1  19  -1    5.90    1.70
  -2  19  -1   15.00    2.30
   2  19   1   14.70    2.30
  -3  19  -1    0.10    1.00
  -3  19  -1    3.00    1.60
   3  19   1   -0.10    1.30
  -4  19  -1   30.70    3.60
   4  19   1   27.80    3.20
  -4  19  -1   32.80    3.20
  -5 -19  -1    4.10    1.70
   5  19   1    3.90    1.70
  -5  19  -1    6.00    1.90
  -5  19  -1    7.00    1.70
  -6 -19  -1    0.60    1.60
  -6  19  -1    1.10    1.20
   6  19   1    0.70    1.60
   5  20  -1    2.30    1.70
  -5  20   1    4.00    1.40
   4  20  -1    0.00    1.40
  -4  20   1    4.20    1.40
  -3  20   1    2.50    1.30
   3  20  -1    5.10    1.90
   2  20  -1    2.20    1.60
  -2  20   1    4.70    1.50
  -1  20   1   98.99    5.20
   1  20  -1  107.69    5.60
   0  20   1    0.90    1.30
   0  20  -1   -0.40    1.10
   1  20   1   39.00    3.30
  -1  20  -1   36.30    3.20
  -2  20  -1    1.10    1.30
   2  20   1    1.80    1.50
   3  20   1   44.30    3.80
  -3  20  -1   46.70    3.50
  -4  20  -1   27.50    3.00
   4  20   1   26.40    3.40
  -5  20  -1    1.40    1.20
   5  20   1    0.10    1.40
  -5  20  -1   -0.10    1.20
   5  21  -1    1.40    1.70
  -5  21   1    2.50    1.30
  -4  21   1   -0.20    1.00
   4  21  -1   -0.10    1.40
  -3  21   1    0.30    1.20
   3  21  -1    0.20    1.30
   2  21  -1  107.79    6.00
  -2  21   1  115.99    5.70
   1  21  -1    6.10    1.90
  -1  21   1    7.20    1.90
   0  21   1    1.50    1.40
   0  21  -1    3.10    1.60
   1  21   1    8.40    2.00
  -1  21  -1    9.40    2.10
  -2  21  -1   51.19    3.90
   2  21   1   52.29    4.00
  -3  21  -1    0.20    1.20
   3  21   1    0.10    1.40
   4  21   1   16.80    2.90
  -4  21  -1   18.00    2.70
   3  22  -1    1.60    1.50
  -3  22   1   -0.40    1.20
  -2  22   1    2.40    1.50
   2  22  -1    0.80    1.40
  -1  22   1   45.40    3.70
   1  22  -1   48.30    4.00
   0  22   1    1.70    1.50
   0  22  -1    0.60    1.40
   1  22   1    4.70    1.80
  -1  22  -1    5.10    1.80
  -2  22  -1    0.40    1.40
   2  22   1    0.70    1.50
   3  22   1   42.90    4.40
  -3  22  -1   41.40    4.00
   1  23  -1    2.70    1.80
  -1  23   1    1.40    1.50
   0  23   1    0.70    1.40
   0  23  -1    0.10    1.40
   1  23   1    9.90    2.40
  -1  23  -1    7.90    2.20
 -11   0   2    0.70    1.20
 -10   0   2    1.50    1.10
 -10   0   2    2.30    1.30
  -9   0   2    0.80    0.90
  -8   0   2   62.69    3.30
  -7   0   2   -0.10    0.60
  -6   0   2   35.70    2.10
  -6   0   2   36.00    1.80
  -5   0   2    0.20    0.30
  -5   0   2    0.20    0.50
  -4   0   2  305.57    9.00
  -4   0   2  303.47    8.70
  -3   0   2    0.00    0.20
  -3   0   2   -0.60    0.30
  -2   0   2 1807.02   52.49
  -2   0   2 2045.30   52.69
  -2   0   2 2040.20   52.99
  -1   0   2    0.30    0.20
  -1   0   2    1.30    0.30
   1   0  -2    0.70    0.20
   1   0  -2    0.10    0.10
   0   0  -2  389.26   10.70
   0   0   2  390.26   10.80
   0   0  -2  393.36   10.80
   1   0   2    0.00    0.30
  -1   0  -2    0.00    0.20
   1   0   2    0.10    0.30
  -1   0  -2    0.10    0.20
  -2   0  -2 1651.13   44.80
  -2   0  -2 1708.03   44.70
   2   0   2 1612.64   44.70
   3   0   2    0.20    0.30
  -3   0  -2    0.00    0.30
  -3   0  -2    0.00    0.40
   4   0   2   27.60    1.40
  -4   0  -2   30.00    1.70
   5   0   2   -0.20    0.40
  -5   0  -2    2.40    0.70
  -6   0  -2  610.04   17.70
   6   0   2  597.74   16.90
  -7   0  -2    0.20    0.80
  -8   0  -2   19.80    2.20
  -9   0  -2   -0.10    1.00
 -10   0  -2   77.69    4.50
 -11   0  -2    0.60    1.30
 -11  -1   2   14.20    2.30
 -11   1   2   13.40    2.20
 -10  -1   2    9.80    1.90
 -10  -1   2   11.60    1.90
 -10   1   2   10.40    1.80
 -10   1   2    9.20    1.70
  -9  -1   2   57.59    3.50
  -9   1   2   64.29    3.40
  -8  -1   2    4.40    1.20
  -8   1   2    3.90    1.10
  -7  -1   2    3.00    0.90
  -7   1   2    1.20    0.70
  -6  -1   2   27.20    1.90
  -6   1   2   29.50    1.70
  -6   1   2   29.00    1.50
  -5  -1   2  229.18    7.30
  -5  -1   2  220.48    7.00
  -5   1   2  226.18    6.70
  -5   1   2  232.78    7.00
  -4  -1   2    6.60    0.90
  -4  -1   2    6.10    0.70
  -4   1   2    5.80    0.70
  -4   1   2    6.00    0.50
   4   1  -2    6.00    0.50
  -3  -1   2  557.54   15.70
  -3  -1   2  567.44   15.90
  -3  -1   2  566.74   15.70
   3   1  -2  563.44   15.40
  -3   1   2  582.84   15.40
  -3   1   2  559.44   15.30
  -2  -1   2  311.47    8.80
  -2  -1   2  316.07    8.90
  -2  -1   2  314.77    8.70
   2   1  -2  303.57    8.70
   2   1  -2  307.17    8.60
  -1  -1   2  252.37    7.30
  -1  -1   2  260.07    7.20
  -1   1   2  250.37    6.90
  -1   1   2  260.37    6.90
   1   1  -2  246.98    7.20
   1   1  -2  250.67    7.20
   1   1  -2  253.97    7.20
   0  -1  -2  950.20   26.30
   0  -1   2  990.00   26.40
   0  -1  -2  998.80   26.20
   0  -1   2 1000.50   26.40
   0   1  -2  971.40   26.40
   0   1   2  973.80   26.20
   0   1   2  966.10   26.30
   0   1  -2  939.31   26.40
   1  -1   2 2317.87   63.09
  -1  -1  -2 2292.57   63.19
   1  -1   2 2337.17   63.89
  -1  -1  -2 2271.27   62.89
   1   1   2 2373.56   63.59
   1   1   2 2426.06   62.99
  -1   1  -2 2403.86   63.39
   2  -1   2   39.30    1.60
  -2  -1  -2   39.30    1.60
   2   1   2   36.70    1.60
  -2   1  -2   42.80    1.60
  -2   1  -2   40.40    1.60
  -3  -1  -2    3.10    0.60
   3  -1   2    1.50    0.40
  -3   1  -2    1.40    0.40
  -3   1  -2    1.30    0.40
   3   1   2    1.90    0.50
   4  -1   2   77.29    2.80
  -4  -1  -2   76.49    3.10
   4   1   2   78.39    2.90
  -4   1  -2   81.39    3.10
  -4   1  -2   83.19    2.90
  -5  -1  -2    0.60    0.60
   5  -1   2    1.60    0.40
  -5   1  -2    2.20    0.70
   5   1   2    1.10    0.50
   6  -1   2   54.19    1.90
  -6  -1  -2   51.39    2.80
   6   1   2   51.29    2.30
  -6   1  -2   51.69    2.70
  -7  -1  -2  253.27    8.50
  -7   1  -2  244.58    8.30
   7   1   2  245.88    7.50
  -8  -1  -2   45.90    3.10
  -8   1  -2   50.49    3.00
  -9  -1  -2    5.60    1.60
  -9   1  -2    6.00    1.50
 -10  -1  -2    0.50    1.30
 -10   1  -2    0.80    1.20
 -11  -1  -2   10.30    2.20
 -11   1  -2   15.30    2.40
 -11  -2   2   -0.90    1.20
 -11   2   2    0.10    1.10
 -10  -2   2    1.90    1.20
 -10  -2   2    1.70    1.20
 -10   2   2    0.40    1.00
 -10   2   2    0.20    0.90
  -9  -2   2    2.30    1.20
  -9   2   2    1.40    0.90
  -8  -2   2   93.79    4.40
  -8   2   2   90.09    3.90
  -7  -2   2    3.70    1.10
  -7   2   2    4.50    0.90
  -6  -2   2  227.68    7.50
   6   2  -2  214.18    6.20
  -6   2   2  219.18    6.60
  -6   2   2  225.28    6.90
  -5  -2   2  118.89    4.40
  -5   2   2  111.19    3.70
   5   2  -2  114.09    3.50
  -5   2   2  111.59    3.50
  -4  -2   2 1664.93   45.40
  -4  -2   2 1681.43   45.10
  -4   2   2 1595.34   44.30
   4   2  -2 1630.74   44.70
  -4   2   2 1725.93   44.50
  -3  -2   2  399.16   11.60
  -3  -2   2  402.86   11.40
  -3  -2   2  398.06   11.40
   3   2  -2  396.56   11.20
  -2  -2   2  162.58    4.70
  -2  -2   2  154.18    4.90
  -2  -2   2  154.58    4.70
   2   2  -2  150.98    4.60
   2   2  -2  145.99    4.70
  -1  -2   2 1141.49   30.80
  -1  -2   2 1149.89   30.80
   1   2  -2 1130.29   30.80
   1   2  -2 1119.79   30.80
   1   2  -2 1124.79   30.70
   0  -2  -2  297.17    8.20
   0  -2   2  286.17    8.40
   0  -2   2  303.17    8.40
   0  -2  -2  295.57    8.20
   0   2   2  290.87    8.20
   0   2  -2  302.27    8.40
   0   2  -2  288.67    8.40
   0   2   2  289.67    8.20
  -1  -2  -2 2221.68   55.89
  -1  -2  -2 1964.00   55.89
   1  -2   2 2098.39   55.99
   1  -2   2 2071.19   55.79
  -1   2  -2 2085.39   55.99
  -1   2  -2 2020.70   55.89
   1   2   2 2023.30   55.99
   1   2   2 2155.88   56.19
   2  -2   2  333.37    9.70
  -2  -2  -2  342.27   10.00
  -2   2  -2  346.27    9.80
   2   2   2  346.97    9.80
  -2   2  -2  351.06    9.80
   3  -2   2  160.58    4.90
  -3   2  -2  167.68    5.10
   3   2   2  162.38    5.20
  -3   2  -2  165.78    5.10
   4  -2   2   61.99    2.20
  -4  -2  -2   59.59    2.70
  -4   2  -2   64.69    2.40
  -4   2  -2   61.89    2.50
   4   2   2   61.89    2.50
   5  -2   2  119.09    3.50
  -5  -2  -2  121.69    4.60
  -5   2  -2  114.29    4.20
   5   2   2  125.39    4.20
  -6  -2  -2  190.18    6.80
   6   2   2  198.88    6.30
  -6   2  -2  192.98    6.50
  -7  -2  -2   30.20    2.40
   7   2   2   33.30    1.80
  -7   2  -2   33.50    2.20
  -8  -2  -2    3.90    1.30
  -8   2  -2    5.80    1.40
  -9  -2  -2    1.30    1.20
  -9   2  -2    0.10    1.00
 -10  -2  -2   93.29    5.10
 -10   2  -2   90.19    4.80
 -11  -2  -2    2.80    1.70
 -11   2  -2    1.50    1.40
 -11  -3   2   23.70    3.00
 -11   3   2   22.20    2.50
 -10  -3   2   12.20    2.10
 -10  -3   2    8.80    1.90
 -10   3   2    8.30    1.60
  -9  -3   2   81.19    4.30
  -9   3   2   79.49    3.70
  -8  -3   2   47.70    3.10
  -8   3   2   44.50    2.50
  -7  -3   2    2.00    1.00
  -7   3   2    3.80    0.80
  -6  -3   2  102.79    4.40
  -6   3   2  102.99    3.60
  -6   3   2  100.89    3.30
   6   3  -2  106.79    3.50
  -5  -3   2  165.98    5.80
  -5   3   2  170.78    4.80
   5   3  -2  165.78    5.10
  -5   3   2  157.28    4.70
  -4  -3   2   24.60    1.80
  -4  -3   2   28.10    1.60
   4   3  -2   28.20    1.40
  -3  -3   2  219.38    6.90
  -3  -3   2  232.38    7.20
  -3   3   2  228.28    6.30
   3   3  -2  225.78    6.80
  -2  -3   2 3935.91  104.49
  -2  -3   2 3845.52  103.69
   2   3  -2 3833.82  104.09
   2   3  -2 3846.52  104.49
  -1  -3   2  280.67    8.30
  -1  -3   2  281.77    8.40
  -1  -3   2  291.47    8.20
   1   3  -2  278.07    8.30
   1   3  -2  282.27    8.20
   0  -3   2 1416.06   37.80
   0  -3   2 1408.16   38.00
   0  -3  -2 1374.46   37.60
   0  -3  -2 1392.46   37.60
   0   3   2 1368.56   37.60
   0   3  -2 1391.76   38.00
   0   3   2 1438.06   37.70
   1  -3   2 1029.90   27.50
   1  -3   2  985.00   27.60
  -1  -3  -2  998.90   27.60
  -1   3  -2 1038.40   27.70
   1   3   2  997.80   27.70
  -1   3  -2 1029.60   27.60
   2  -3   2   75.79    2.70
  -2  -3  -2   78.19    2.90
   2   3   2   81.29    2.80
  -2   3  -2   81.09    2.70
  -2   3  -2   82.59    2.80
   3  -3   2  996.70   27.10
  -3   3  -2 1009.00   27.40
  -3   3  -2 1003.40   27.30
   3   3   2  992.50   27.50
  -4  -3  -2    5.60    0.90
  -4   3  -2    8.60    0.90
  -4   3  -2    9.10    0.90
   4   3   2    8.20    1.00
  -5  -3  -2  204.38    6.90
  -5   3  -2  194.08    6.20
   5   3   2  195.88    6.40
  -5   3  -2  196.18    6.30
  -6  -3  -2   33.10    2.40
   6   3   2   31.20    1.90
  -6   3  -2   29.10    1.90
  -7  -3  -2   64.79    3.50
  -7   3  -2   61.59    3.10
   7   3   2   61.49    2.80
  -8  -3  -2   59.59    3.70
  -8   3  -2   64.39    3.40
  -9  -3  -2   32.10    3.10
  -9   3  -2   41.90    2.90
 -10  -3  -2    5.20    1.60
 -10   3  -2   11.60    2.00
 -11  -3  -2   18.00    2.80
 -11   3  -2   19.80    2.60
 -11  -4   2   -0.50    1.30
 -11   4   2    0.00    1.10
 -10  -4   2   40.00    3.70
 -10  -4   2   39.70    3.40
 -10   4   2   36.10    2.60
  -9  -4   2    2.30    1.40
  -9   4   2    4.50    1.10
  -8  -4   2   57.49    3.50
  -8   4   2   53.39    2.60
  -7  -4   2   11.40    1.50
  -7  -4   2    8.10    1.50
   7   4  -2    9.00    1.00
  -7   4   2   10.70    1.10
  -6  -4   2   10.20    1.60
  -6  -4   2    8.60    1.30
   6   4  -2    8.00    1.00
  -6   4   2   10.50    0.80
  -6   4   2    7.60    0.60
  -5  -4   2   21.90    1.80
  -5  -4   2   17.70    1.50
   5   4  -2   14.50    1.20
  -4  -4   2 1297.77   35.00
  -4  -4   2 1226.98   35.10
   4   4  -2 1265.87   34.60
  -4   4   2 1265.77   34.10
  -3  -4   2   41.10    2.00
  -3  -4   2   37.00    2.10
   3   4  -2   38.60    1.80
  -3   4   2   40.40    1.40
   2  -4  -2   16.00    0.80
  -2  -4   2   16.30    1.20
   2   4  -2   16.80    1.20
   2   4  -2   11.80    1.00
   1  -4  -2 1011.90   27.30
  -1  -4   2  992.40   27.70
  -1  -4   2  986.90   27.70
   1   4  -2 1009.40   27.70
  -1   4   2  979.90   26.90
  -1   4   2 1040.30   26.90
   1   4  -2 1007.50   27.60
   0  -4  -2 3484.95   97.99
   0  -4   2 3655.73   97.79
   0  -4  -2 3729.53   97.59
   0   4  -2 3563.64   97.79
   0   4   2 3712.23   97.49
   0   4   2 3708.53   98.29
   1  -4   2  180.58    5.60
  -1  -4  -2  179.68    5.70
  -1   4  -2  190.98    5.70
   1   4   2  179.68    5.70
  -1   4  -2  204.18    5.80
   2  -4   2  320.07    9.20
  -2  -4  -2  331.87    9.70
   2   4   2  323.87    9.50
  -2   4  -2  334.07    9.50
  -2   4  -2  321.57    9.30
  -3  -4  -2   21.00    1.50
   3  -4   2   20.80    0.80
   3  -4   2   21.60    0.80
  -3   4  -2   20.10    1.20
  -3   4  -2   19.60    1.20
  -4  -4  -2  199.68    7.20
  -4   4  -2  231.58    6.80
  -4   4  -2  227.08    6.80
  -5  -4  -2    3.90    1.00
  -5   4  -2    7.90    0.90
  -5   4  -2    9.10    1.00
  -6   4  -2  391.46   11.90
  -6   4  -2  391.06   11.70
  -7  -4  -2    8.80    1.60
   7   4   2    7.00    1.10
  -7   4  -2    6.80    1.20
  -8  -4  -2  122.99    5.60
  -8   4  -2  120.19    4.90
  -9  -4  -2    3.00    1.50
  -9   4  -2    6.20    1.50
 -10  -4  -2   96.89    5.50
 -10   4  -2  106.19    5.00
 -11  -4  -2    3.40    1.80
 -11   4  -2    0.60    1.20
 -11  -5   2    7.90    2.20
 -11   5   2    7.80    1.60
 -10  -5   2    2.50    1.40
 -10  -5   2    0.30    1.30
 -10   5   2   -0.80    0.80
  -9  -5   2  168.68    7.30
  -9  -5   2  186.28    7.50
  -9   5   2  179.48    6.20
  -9   5   2  182.38    6.20
  -8  -5   2    4.10    1.40
  -8   5   2    2.80    0.80
  -7  -5   2   83.19    3.90
  -7  -5   2   79.89    4.10
  -7   5   2   84.19    3.00
   7   5  -2   81.39    3.20
  -6  -5   2    2.10    0.80
  -6  -5   2    0.80    0.90
   6   5  -2    1.80    0.60
  -6   5   2    1.60    0.40
  -5  -5   2  292.77    9.50
  -5  -5   2  298.17    9.80
   5   5  -2  310.77    9.20
  -5   5   2  297.77    8.70
  -4  -5   2  370.46   11.80
  -4  -5   2  396.76   11.80
   4   5  -2  393.86   11.50
  -4   5   2  387.96   10.90
  -3  -5   2  206.98    6.60
   3   5  -2  187.38    6.30
  -3   5   2  201.48    5.90
  -2  -5   2  451.05   13.00
   2  -5  -2  449.36   12.50
   2   5  -2  421.16   12.90
   2   5  -2  454.45   12.80
   1  -5  -2    1.40    0.40
  -1  -5   2    1.40    0.50
  -1  -5   2    1.00    0.40
  -1   5   2    1.90    0.30
  -1   5   2    1.60    0.30
   1   5  -2    0.70    0.50
   1   5  -2    0.90    0.40
   0  -5   2  297.97    8.90
   0  -5   2  326.67    9.20
   0  -5  -2  285.07    8.50
   0   5   2  302.47    8.70
   0   5   2  294.37    8.60
  -1  -5  -2 1565.64   43.30
   1  -5   2 1583.04   43.20
  -1   5  -2 1632.04   43.30
  -1   5  -2 1608.94   43.40
  -1   5  -2 1584.14   43.60
   2  -5   2  766.32   21.10
  -2  -5  -2  761.02   21.60
  -2   5  -2  786.22   21.50
  -2   5  -2  775.32   21.30
  -3  -5  -2  169.78    5.70
  -3   5  -2  166.08    5.20
  -3   5  -2  165.58    5.10
   3   5   2  153.18    5.40
  -4  -5  -2  138.39    5.20
   4   5   2  133.19    4.80
  -4   5  -2  140.79    4.60
  -4   5  -2  140.49    4.50
  -5  -5  -2  689.13   20.40
  -5   5  -2  708.13   19.60
  -5   5  -2  699.13   19.60
   5   5   2  693.83   20.00
  -6   5  -2  123.49    4.50
   6   5   2  129.79    4.80
  -6   5  -2  127.99    4.60
  -7  -5  -2    7.90    1.70
  -7   5  -2    9.90    1.30
  -8  -5  -2   33.80    2.90
  -8   5  -2   31.90    2.30
  -9  -5  -2   95.29    5.10
  -9   5  -2   96.59    4.50
 -10  -5  -2   12.30    2.40
 -10   5  -2   11.30    1.90
 -11  -5  -2    9.00    2.30
 -11   5  -2   11.30    2.00
 -11  -6   2    0.40    1.50
 -11   6   2    0.50    1.00
 -10  -6   2    4.30    1.70
 -10  -6   2    4.50    1.80
 -10   6   2    3.60    1.10
  -9  -6   2    9.00    2.00
  -9  -6   2   10.20    2.10
  -9   6   2    8.00    1.20
  -8  -6   2  177.38    7.20
  -8   6   2  170.98    5.60
  -7  -6   2   14.60    2.00
  -7   6   2   12.20    1.10
  -7   6   2   11.00    0.90
   7   6  -2   13.10    1.40
  -6  -6   2   81.79    3.80
   6   6  -2   74.19    3.20
  -6   6   2   71.39    2.80
  -5  -6   2   71.59    3.40
  -5   6   2   72.89    2.70
  -4  -6   2 1430.16   44.50
  -4  -6   2 1685.73   44.70
  -4   6   2 1718.83   43.70
  -3  -6   2  333.07   10.60
  -3  -6   2  357.26   10.70
  -3   6   2  344.57    9.90
  -2  -6   2    2.30    0.70
   2  -6  -2    0.60    0.40
  -2  -6   2    0.50    0.50
   2   6  -2   -0.10    0.20
   2   6  -2    1.10    0.60
  -1  -6   2  204.68    6.40
  -1  -6   2  206.08    6.60
   1  -6  -2  182.08    6.10
  -1   6   2  201.18    5.80
  -1   6   2  200.78    5.80
   0  -6   2  805.02   22.20
   0  -6  -2  781.12   21.50
   0  -6   2  777.22   21.90
   0   6   2  761.92   21.60
   0   6   2  804.72   21.70
  -1  -6  -2    2.50    0.50
   1  -6   2    2.50    0.50
  -1   6  -2    2.30    0.60
  -1   6  -2    2.50    0.60
  -1   6  -2    1.80    0.60
   2  -6   2    6.30    0.60
  -2   6  -2    5.10    0.80
   2   6   2    5.10    0.80
  -2   6  -2    5.90    0.80
  -3  -6  -2  749.82   21.90
  -3   6  -2  785.42   21.50
   3   6   2  778.42   21.80
  -3   6  -2  764.92   21.30
  -4  -6  -2 1208.58   34.00
  -4   6  -2 1219.98   33.10
   4   6   2 1191.38   33.60
  -4   6  -2 1224.48   33.30
  -5  -6  -2  320.17   10.30
  -5   6  -2  307.07    9.40
  -5   6  -2  313.07    9.40
   5   6   2  312.47    9.80
  -6   6  -2   33.50    1.90
   6   6   2   36.20    2.20
  -6   6  -2   36.10    2.00
  -7  -6  -2   33.40    3.10
  -7   6  -2   35.20    2.10
   7   6   2   31.50    2.30
  -8  -6  -2  135.39    6.10
  -8   6  -2  132.59    5.20
  -9  -6  -2    3.70    1.60
  -9   6  -2    4.40    1.20
 -10  -6  -2   40.30    4.00
 -10   6  -2   41.40    3.00
 -11  -6  -2   -1.10    1.40
 -11   6  -2    2.50    1.30
 -11  -7   2    6.80    2.10
 -10  -7   2    2.80    1.80
 -10  -7   2    0.40    1.50
 -10   7   2    1.00    0.80
  -9  -7   2  108.89    5.50
  -9  -7   2   95.69    5.40
  -9   7   2  101.19    3.90
  -8  -7   2   43.40    3.30
  -8   7   2   43.50    2.00
  -7  -7   2   19.50    2.40
  -7   7   2   20.60    1.10
  -7   7   2   19.50    1.40
  -6  -7   2    0.10    0.30
  -6   7   2    0.10    0.50
   6   7  -2    0.70    0.70
  -5  -7   2  430.36   13.30
   5   7  -2  421.56   12.80
  -5   7   2  417.26   12.20
  -4  -7   2   31.30    2.30
  -4  -7   2   32.10    2.20
  -4   7   2   33.30    1.70
   4   7  -2   30.50    2.00
  -3  -7   2   80.39    3.50
  -3  -7   2   76.59    3.50
  -3   7   2   78.19    2.90
   3   7  -2   76.09    3.20
  -2  -7   2    7.40    1.10
   2  -7  -2    8.10    1.00
  -2  -7   2    5.30    1.00
  -2   7   2    8.60    0.50
   2   7  -2    6.90    1.10
   2   7  -2    8.90    1.20
  -2   7   2    9.00    0.50
  -1  -7   2  342.67   10.10
  -1  -7   2  333.07   10.30
   1  -7  -2  335.27   10.00
   1   7  -2  331.57   10.10
  -1   7   2  339.97    9.50
  -1   7   2  335.87    9.50
   1   7  -2  310.27   10.20
   0  -7   2  595.24   17.40
   0  -7  -2  583.64   17.20
   0  -7  -2  603.44   16.60
   0  -7   2  581.84   17.00
   0   7  -2  613.34   17.50
   0   7   2  620.04   16.90
   0   7  -2  593.74   17.10
   0   7   2  610.04   16.80
   1  -7   2  706.23   20.10
  -1  -7  -2  724.23   20.30
  -1   7  -2  746.53   20.80
   1   7   2  725.13   20.40
  -1   7  -2  725.33   20.40
   2  -7   2   45.70    1.70
  -2   7  -2   44.30    2.00
   2   7   2   41.50    2.20
  -2   7  -2   42.70    2.40
  -2   7  -2   46.10    2.10
  -3  -7  -2  826.42   23.60
   3   7   2  816.62   23.40
  -3   7  -2  843.92   23.00
  -3   7  -2  825.62   23.10
  -4  -7  -2   29.20    2.10
  -4   7  -2   25.20    1.60
   4   7   2   25.60    1.80
  -4   7  -2   27.30    1.50
  -5  -7  -2  599.44   18.00
  -5   7  -2  604.84   16.90
  -5   7  -2  588.94   17.10
   5   7   2  590.44   17.50
  -6  -7  -2    7.10    1.50
   6   7   2    6.50    1.20
  -6   7  -2    6.00    1.00
  -7  -7  -2   27.40    2.80
   7   7   2   25.80    2.10
  -7   7  -2   27.10    1.90
  -8  -7  -2    0.10    1.20
  -8   7  -2    0.20    0.70
  -9  -7  -2   31.80    3.40
  -9   7  -2   29.90    2.40
 -10  -7  -2    4.20    1.70
 -10   7  -2    8.00    1.60
 -10  -8   2   -2.00    1.10
  -9  -8   2   24.10    3.00
  -9  -8   2   28.90    3.20
  -9   8   2   24.20    1.70
  -8  -8   2  165.48    7.10
  -8  -8   2  163.58    7.10
  -8   8   2  165.08    5.10
  -7  -8   2   28.40    2.90
   7   8  -2   24.00    2.00
  -7   8   2   25.30    1.60
  -6  -8   2   11.50    1.90
  -6   8   2   13.20    1.20
   6   8  -2   11.70    1.60
  -5  -8   2  259.97    9.00
  -5   8   2  258.87    8.00
   5   8  -2  258.47    8.50
  -4  -8   2   84.39    3.90
  -4  -8   2   88.59    4.00
   4   8  -2   83.99    3.70
  -4   8   2   86.89    3.30
  -3  -8   2   15.10    1.80
  -3  -8   2   10.50    1.40
  -3   8   2   13.80    1.20
   3   8  -2   12.40    1.40
  -2  -8   2  242.48    7.80
  -2  -8   2  228.78    7.80
   2  -8  -2  235.08    7.40
   2   8  -2  231.48    7.60
  -2   8   2  236.98    6.80
  -2   8   2  231.88    6.70
   2   8  -2  231.38    7.90
   1  -8  -2   61.39    2.80
  -1  -8   2   65.49    3.10
   1   8  -2   62.59    3.10
  -1   8   2   71.29    2.60
  -1   8   2   65.19    2.50
   1   8  -2   71.99    3.00
   0  -8  -2  792.22   22.30
   0  -8  -2  754.92   21.50
   0  -8   2  802.92   22.50
   0  -8   2  781.72   21.90
   0   8  -2  783.42   22.50
   0   8   2  792.92   21.80
   0   8  -2  770.02   22.10
  -1  -8  -2    1.30    0.60
   1  -8   2    0.90    0.50
   1   8   2    0.40    0.50
  -1   8  -2    0.00    0.60
  -1   8  -2    1.20    0.60
   2  -8   2  421.76   11.90
   2  -8   2  423.46   11.90
  -2   8  -2  430.16   12.60
  -2   8  -2  430.86   12.50
   2   8   2  432.06   12.70
  -2   8  -2  435.76   13.10
  -3  -8  -2  101.29    4.20
  -3   8  -2  103.19    4.30
  -3   8  -2   99.89    3.60
  -3   8  -2   95.19    3.70
   3   8   2   97.99    4.00
  -4  -8  -2    3.60    1.00
  -4   8  -2    5.20    0.80
   4   8   2    3.60    0.90
  -4   8  -2    4.30    0.80
  -5  -8  -2   29.60    2.40
  -5   8  -2   24.50    1.70
   5   8   2   28.80    2.10
  -5   8  -2   24.70    1.60
  -6  -8  -2  467.15   15.00
   6   8   2  478.55   14.50
  -6   8  -2  470.35   13.80
  -7  -8  -2    0.00    1.10
  -7   8  -2   -0.40    0.60
   7   8   2   -0.40    0.80
  -8  -8  -2   -0.20    1.30
  -8   8  -2    0.00    0.70
   8   8   2    1.10    1.00
  -9  -8  -2   -0.50    1.20
  -9   8  -2    0.30    0.90
 -10  -8  -2   29.10    3.60
 -10   8  -2   22.20    2.40
 -10  -9   2    6.00    1.90
  -9  -9   2   34.80    3.60
  -9  -9   2   43.00    3.70
  -8  -9   2    0.30    1.20
  -8  -9   2    0.50    1.30
  -8   9   2    0.50    0.50
  -7  -9   2   96.39    5.10
   7   9  -2  110.89    4.60
  -6  -9   2    0.30    1.00
   6   9  -2    0.40    0.80
  -6   9   2    1.30    0.60
  -5  -9   2   11.60    1.80
   5   9  -2   15.20    1.70
  -5   9   2   12.70    1.30
  -4  -9   2   13.80    1.70
  -4   9   2   14.90    1.30
   4   9  -2   14.50    1.60
  -3  -9   2   36.90    2.40
  -3  -9   2   38.00    2.50
  -3   9   2   37.20    1.40
  -3   9   2   37.60    2.10
   3   9  -2   36.30    2.30
  -3   9   2   38.60    1.40
  -2  -9   2   77.99    3.50
  -2  -9   2   80.89    3.70
   2  -9  -2   77.39    3.30
  -2   9   2   80.39    2.80
   2   9  -2   76.49    3.50
  -2   9   2   77.49    2.80
   1  -9  -2  208.98    7.10
  -1  -9   2  211.78    7.40
   1   9  -2  213.98    7.20
  -1   9   2  215.88    6.70
  -1   9   2  224.38    6.70
   0  -9   2  188.88    6.30
   0  -9  -2  198.78    6.70
   0  -9  -2  179.38    5.90
   0  -9   2  211.08    7.00
   0   9   2  197.98    6.30
   0   9  -2  194.78    6.60
   0   9  -2  190.08    6.80
   1  -9   2  437.16   12.40
  -1  -9  -2  437.16   12.70
  -1  -9  -2  431.26   13.30
  -1   9  -2  432.36   13.40
   1   9   2  437.26   12.90
  -1   9  -2  429.36   12.90
   2  -9   2   57.09    2.00
  -2  -9  -2   53.89    2.70
   2   9   2   53.19    2.70
  -2   9  -2   57.59    3.00
  -2   9  -2   55.39    2.60
  -3  -9  -2  295.97    9.80
   3   9   2  310.97    9.80
  -3   9  -2  296.67    9.30
  -3   9  -2  325.17   10.10
  -3   9  -2  305.07    9.50
  -4  -9  -2  305.97   10.00
  -4   9  -2  308.77    9.20
  -4   9  -2  305.67   10.00
  -4   9  -2  289.67    9.30
   4   9   2  295.37    9.70
  -5  -9  -2    1.30    0.90
  -5   9  -2    0.70    0.80
  -5   9  -2    0.70    0.60
   5   9   2    0.00    0.80
  -5   9  -2    0.50    0.60
  -6  -9  -2   33.70    3.10
   6   9   2   31.20    2.40
  -6   9  -2   32.70    2.00
  -7  -9  -2    0.50    1.10
  -7   9  -2    2.80    0.90
   7   9   2    1.40    1.00
  -8  -9  -2    1.60    1.40
   8   9   2    1.50    1.10
  -8   9  -2    1.70    0.90
  -9  -9  -2   19.90    2.90
  -9   9  -2   21.20    2.10
 -10  -9  -2   -1.50    1.30
 -10   9  -2   -0.10    0.90
 -10 -10   2    6.00    2.10
  -9 -10   2   -1.40    1.30
  -9 -10   2    1.00    1.40
  -8 -10   2  127.09    6.30
  -8 -10   2  132.39    6.30
  -7 -10   2   11.10    2.00
  -7 -10   2   16.30    2.30
   7  10  -2   11.60    1.80
  -6 -10   2   86.19    4.60
  -6  10   2   86.99    3.60
   6  10  -2   89.39    4.20
  -5 -10   2   -0.10    0.90
  -5  10   2   -0.10    0.60
   5  10  -2    0.40    0.80
  -4 -10   2  100.09    4.60
   4  10  -2  108.29    4.40
  -4  10   2   92.29    3.90
  -3 -10   2  231.58    8.10
  -3  10   2  235.78    6.80
  -3  10   2  235.68    6.80
   3  10  -2  226.88    7.90
   2 -10  -2   70.79    3.20
  -2 -10   2   67.99    3.40
  -2  10   2   73.89    2.80
   2  10  -2   72.69    3.40
  -2  10   2   72.69    2.70
  -1 -10   2    3.40    0.90
   1 -10  -2    3.40    0.90
  -1 -10   2    1.60    0.80
  -1  10   2    2.60    0.70
  -1  10   2    3.40    0.70
   1  10  -2    3.00    0.90
   0 -10  -2   93.19    4.00
   0 -10   2   95.39    3.60
   0 -10   2   98.29    4.30
   0 -10  -2   91.49    3.30
   0  10  -2   95.59    4.30
   0  10   2   95.59    3.70
   0  10  -2   91.59    3.90
  -1 -10  -2    5.70    1.00
  -1 -10  -2    3.80    1.00
   1 -10   2    5.50    0.80
   1 -10   2    6.10    0.80
  -1  10  -2    5.80    1.10
  -1  10  -2    3.80    1.00
   1  10   2    5.00    1.00
  -2 -10  -2   82.19    3.60
   2 -10   2   81.69    2.70
   2  10   2   87.79    3.70
  -2  10  -2   83.19    3.50
  -2  10  -2   84.19    4.00
  -3 -10  -2   59.69    3.20
   3  10   2   61.59    3.10
  -3  10  -2   56.49    3.20
  -3  10  -2   59.99    2.80
  -4 -10  -2   34.90    2.50
  -4  10  -2   32.70    2.10
  -4  10  -2   38.70    2.60
  -4  10  -2   31.20    1.90
   4  10   2   36.30    2.40
  -5 -10  -2  128.99    5.60
  -5  10  -2  133.99    4.70
  -5  10  -2  129.89    5.50
   5  10   2  122.59    5.20
  -6 -10  -2   39.70    3.20
  -6  10  -2   39.40    2.90
  -6  10  -2   46.60    2.40
   6  10   2   48.70    3.00
  -7 -10  -2   56.69    3.80
  -7  10  -2   48.00    2.60
   7  10   2   51.79    3.20
  -7  10  -2   54.39    3.40
  -8 -10  -2    8.10    2.00
  -8  10  -2    5.00    1.40
   8  10   2    5.30    1.40
  -8  10  -2    3.50    1.00
  -9 -10  -2    3.60    1.80
  -9  10  -2    6.10    1.30
 -10 -10  -2    9.80    2.50
 -10  10  -2   10.30    1.70
 -10 -11   2    1.00    1.60
  -9 -11   2   13.90    2.60
  -8 -11   2    1.70    1.50
  -8 -11   2    0.50    1.30
  -7 -11   2    0.50    1.30
  -7 -11   2    0.10    1.20
   7  11  -2    0.50    1.00
  -6 -11   2    2.80    1.40
  -6  11   2    2.90    0.90
   6  11  -2    3.70    1.20
  -5 -11   2   -0.10    1.00
   5  11  -2    0.30    0.90
  -5  11   2   -0.20    0.60
  -4 -11   2  147.59    6.00
  -4  11   2  144.79    5.40
  -4  11   2  148.09    4.50
   4  11  -2  139.29    5.70
  -4  11   2  146.99    4.50
  -3 -11   2  382.86   12.20
   3  11  -2  389.56   12.20
  -3  11   2  374.06   10.90
  -3  11   2  381.06   11.00
   2 -11  -2  130.39    5.20
  -2 -11   2  140.09    5.30
  -2  11   2  133.39    4.60
  -2  11   2  142.89    4.70
  -2  11   2  132.49    4.60
   2  11  -2  139.49    5.40
   1 -11  -2    2.20    0.80
  -1 -11   2    1.60    0.80
  -1  11   2    2.20    0.70
   1  11  -2    0.10    0.50
   1  11  -2    3.10    1.00
   0 -11  -2   62.19    2.50
   0 -11   2   60.19    2.80
   0 -11  -2   62.99    3.30
   0  11   2   63.89    2.90
   0  11  -2   59.39    3.10
   0  11  -2   66.89    3.50
  -1 -11  -2  822.82   23.20
   1 -11   2  823.02   22.80
   1 -11   2  829.12   22.80
  -1  11  -2  814.12   23.50
   1  11   2  817.42   23.40
  -1  11  -2  808.32   24.00
   2 -11   2   55.09    1.90
  -2 -11  -2   52.29    2.80
  -2  11  -2   55.09    2.70
   2  11   2   47.00    2.70
  -2  11  -2   51.69    3.10
  -3 -11  -2   83.79    3.90
  -3  11  -2   80.09    3.50
  -3  11  -2   80.69    4.00
   3  11   2   80.99    3.80
  -4 -11  -2   35.60    2.60
  -4  11  -2   36.50    2.60
   4  11   2   32.30    2.40
  -4  11  -2   31.60    2.00
  -5 -11  -2  106.49    5.00
  -5  11  -2  102.59    4.80
   5  11   2  102.49    4.60
  -5  11  -2   92.19    3.90
  -6 -11  -2   49.70    3.60
  -6  11  -2   58.69    2.80
  -6  11  -2   56.99    3.50
   6  11   2   58.39    3.50
  -7 -11  -2    3.10    1.50
   7  11   2    2.20    1.20
  -7  11  -2    1.40    1.10
  -7  11  -2    3.50    1.00
  -8 -11  -2    0.60    1.40
   8  11   2    1.20    1.00
  -8  11  -2   -0.60    0.70
  -9 -11  -2    6.20    2.00
  -9  11  -2    4.90    1.20
 -10 -11  -2   -1.40    1.40
 -10  11  -2    0.30    0.90
  -9 -12   2    1.20    1.60
  -8 -12   2   61.49    4.40
  -8 -12   2   65.89    4.50
  -7 -12   2    2.20    1.50
  -7 -12   2    0.30    1.30
   7  12  -2    2.00    1.20
  -6 -12   2    2.90    1.50
  -6 -12   2    3.00    1.40
  -6  12   2    3.30    0.50
   6  12  -2    3.20    1.30
  -6  12   2    2.80    1.00
  -5 -12   2    1.10    1.10
  -5 -12   2    0.80    1.10
  -5  12   2    0.40    0.40
   5  12  -2   -0.10    0.90
  -5  12   2    0.40    0.70
  -4 -12   2  138.39    5.90
  -4  12   2  139.89    4.50
   4  12  -2  133.09    5.60
  -3 -12   2   63.09    3.40
  -3  12   2   60.79    2.60
  -3  12   2   56.99    2.50
  -3  12   2   62.69    2.50
   3  12  -2   68.69    3.50
   2 -12  -2   52.19    2.90
  -2 -12   2   52.19    3.00
  -2  12   2   52.19    2.40
  -2  12   2   50.79    2.50
   2  12  -2   56.69    3.10
  -2  12   2   50.39    2.40
   1 -12  -2   -0.20    0.70
  -1 -12   2    0.90    0.70
  -1  12   2    0.60    0.60
   1  12  -2    0.00    0.20
   1  12  -2    0.10    0.40
   0 -12  -2  246.48    7.50
   0 -12   2  245.28    7.90
   0 -12   2  246.08    7.90
   0  12  -2  246.88    8.40
   0  12   2  255.57    8.20
   0  12  -2  251.47    8.90
   1 -12   2  311.47    9.20
  -1 -12  -2  305.77    9.50
  -1  12  -2  297.97    9.90
   1  12   2  300.87    9.80
  -1  12  -2  311.47   10.50
  -2 -12  -2   39.90    2.50
   2 -12   2   38.50    1.50
  -2  12  -2   40.80    2.80
  -2  12  -2   40.20    2.40
  -3 -12  -2   -0.30    0.80
  -3  12  -2   -0.70    0.70
   3  12   2   -1.00    0.60
  -3  12  -2   -0.80    0.60
  -4 -12  -2   55.49    3.40
  -4  12  -2   58.09    3.50
   4  12   2   62.19    3.50
  -4  12  -2   59.09    2.90
  -5 -12  -2   54.69    3.60
  -5  12  -2   52.29    3.50
  -5  12  -2   59.29    2.90
   5  12   2   60.19    3.50
  -6 -12  -2   24.20    2.90
  -6  12  -2   30.50    2.60
   6  12   2   31.80    2.90
  -6  12  -2   22.80    1.90
  -7 -12  -2   89.49    5.00
   7  12   2   81.69    4.40
  -7  12  -2   73.39    3.50
  -7  12  -2   78.29    4.40
  -8 -12  -2   18.90    3.00
  -8  12  -2   13.50    1.70
   8  12   2   13.30    2.10
  -9 -12  -2    0.50    1.60
  -9  12  -2    0.80    0.90
  -9 -13   2   21.00    3.20
  -8 -13   2   15.30    2.60
  -7 -13   2   80.49    4.80
  -7 -13   2   68.09    4.60
   7  13  -2   74.89    4.20
  -6 -13   2    4.30    1.60
  -6 -13   2    5.80    1.90
  -6  13   2    6.40    1.30
   6  13  -2    6.20    1.60
  -6  13   2    6.10    0.80
  -5 -13   2    3.20    1.40
  -5 -13   2    2.40    1.40
  -5  13   2    1.80    0.60
   5  13  -2    0.40    1.00
  -4 -13   2    4.90    1.40
  -4 -13   2    4.80    1.40
   4  13  -2    5.30    1.40
  -4  13   2    4.10    0.80
  -3 -13   2  136.59    5.80
  -3 -13   2  138.49    5.80
   3  13  -2  150.18    6.00
  -3  13   2  140.99    5.00
  -2 -13   2    5.20    1.20
  -2 -13   2    5.20    1.20
  -2  13   2    4.00    0.90
   2  13  -2    6.10    1.40
   0 -13  -2    6.00    0.90
   0 -13   2    7.90    1.20
   0 -13   2    6.30    1.10
   0  13   2   10.20    1.50
   0  13  -2    5.40    1.20
   0  13  -2    5.90    1.50
  -1 -13  -2  187.38    6.30
   1 -13   2  180.98    5.90
  -1  13  -2  184.88    6.80
  -1  13  -2  183.48    7.30
   1  13   2  178.38    6.60
  -2 -13  -2   -0.20    0.70
   2 -13   2    0.40    0.30
   2  13   2    0.40    0.40
  -2  13  -2    1.10    0.80
  -2  13  -2    0.60    0.80
  -3 -13  -2  259.37    9.10
   3  13   2  275.27    9.20
  -3  13  -2  255.57    9.40
  -3  13  -2  262.67    8.80
  -4 -13  -2   -0.10    0.90
  -4  13  -2    0.00    0.70
   4  13   2   -0.30    0.90
  -4  13  -2    1.50    1.20
  -5 -13  -2    6.70    1.60
  -5  13  -2    7.10    1.70
   5  13   2    7.30    1.70
  -5  13  -2    4.70    1.10
  -6 -13  -2   25.40    3.00
  -6  13  -2   25.80    2.80
  -6  13  -2   29.10    2.20
   6  13   2   27.30    2.80
  -7 -13  -2    6.30    2.00
  -7  13  -2    3.50    1.40
   7  13   2    5.10    1.50
  -7  13  -2    4.20    1.10
  -8 -13  -2    2.00    1.70
   8  13   2    1.50    1.20
  -8  13  -2    2.00    1.00
  -9 -13  -2   12.50    2.60
  -9  13  -2   10.00    1.60
  -9 -14   2   -1.40    1.50
  -8 -14   2   26.80    3.40
  -7 -14   2    7.10    2.00
  -7 -14   2    7.80    2.10
   7  14  -2    7.30    1.70
  -6 -14   2   78.99    4.80
  -6 -14   2   79.89    4.70
  -6  14   2   76.79    3.10
   6  14  -2   76.59    4.40
  -5 -14   2   70.09    4.30
  -5 -14   2   70.79    4.30
   5  14  -2   72.79    4.10
  -5  14   2   74.59    3.00
  -4 -14   2   94.79    4.80
  -4 -14   2   96.69    4.90
   4  14  -2   99.39    4.80
  -4  14   2   96.39    3.80
  -3 -14   2    6.00    1.40
  -3 -14   2    4.80    1.40
  -3  14   2    5.90    1.10
   3  14  -2    6.00    1.50
  -2 -14   2   49.50    3.00
  -2 -14   2   49.60    3.10
  -2  14   2   50.59    2.70
   2  14  -2   45.20    3.10
  -1 -14   2   24.70    2.00
  -1 -14   2   20.90    2.10
  -1  14   2   23.70    1.90
   1  14  -2   25.50    2.70
   0 -14   2   11.50    1.40
   0 -14  -2    7.60    1.00
   0  14   2    7.70    1.30
   0  14  -2   10.20    1.60
   0  14  -2    9.20    1.70
  -1 -14  -2    3.70    0.90
   1 -14   2    5.10    0.90
  -1  14  -2    6.40    1.40
  -1  14  -2    5.70    1.50
   1  14   2    4.60    1.20
  -2 -14  -2  225.38    7.80
  -2  14  -2  214.48    8.50
  -2  14  -2  229.28    7.90
   2  14   2  218.88    8.00
  -3 -14  -2  162.38    6.50
  -3  14  -2  168.58    6.30
  -3  14  -2  175.58    7.10
   3  14   2  159.78    6.60
  -4 -14  -2   25.00    2.70
   4  14   2   29.10    2.90
  -4  14  -2   25.70    2.10
  -4  14  -2   24.90    2.80
  -5 -14  -2    1.80    1.30
   5  14   2   -0.30    1.10
  -5  14  -2    0.70    0.80
  -5  14  -2    0.10    1.00
  -6 -14  -2  142.39    6.70
  -6  14  -2  146.49    6.60
   6  14   2  155.68    6.50
  -6  14  -2  147.09    5.80
  -7 -14  -2    0.20    1.30
   7  14   2    1.00    1.20
  -7  14  -2   -0.80    0.70
  -7  14  -2    1.60    1.20
  -8 -14  -2   17.90    3.00
   8  14   2   15.70    2.30
  -8  14  -2   18.90    2.10
  -9 -14  -2    2.40    1.70
  -9  14  -2    1.90    1.10
  -8 -15   2   11.60    2.60
  -7 -15   2   46.70    4.00
   7  15  -2   50.59    3.70
  -6 -15   2   -1.10    1.20
   6  15  -2   -0.30    1.20
  -6  15   2    0.20    0.60
  -5 -15   2   59.39    4.00
  -5 -15   2   52.49    3.80
   5  15  -2   55.39    3.70
  -5  15   2   49.70    2.60
  -4 -15   2   15.40    2.30
  -4 -15   2   12.50    2.20
  -4  15   2   15.00    1.60
   4  15  -2   12.90    2.10
  -3 -15   2   92.89    4.60
  -3 -15   2   86.99    4.50
   3  15  -2   91.09    4.70
  -3  15   2   90.39    3.90
  -2 -15   2    3.00    1.20
  -2 -15   2    4.90    1.30
  -2  15   2    2.60    1.00
   2  15  -2    4.50    1.30
  -1 -15   2   18.80    2.00
  -1  15   2   11.40    1.60
   1  15  -2   17.70    2.20
   0 -15   2   53.19    2.80
   0  15   2   54.19    3.10
   0  15  -2   58.19    3.80
   0  15  -2   56.19    3.40
  -1 -15  -2   34.40    2.20
  -1  15  -2   33.20    2.70
   1  15   2   42.20    2.80
  -1  15  -2   37.60    3.10
  -2 -15  -2   95.79    4.20
  -2  15  -2   84.59    4.30
   2  15   2   85.89    4.40
  -2  15  -2   95.49    4.90
  -3 -15  -2   97.09    4.70
   3  15   2   98.39    4.80
  -3  15  -2   97.19    5.10
  -3  15  -2  101.49    4.60
  -4 -15  -2   10.90    1.90
  -4  15  -2   11.30    1.70
  -4  15  -2   11.30    2.10
   4  15   2   11.60    2.00
  -5 -15  -2  207.38    8.20
  -5  15  -2  194.58    7.30
   5  15   2  195.28    7.90
  -5  15  -2  199.28    8.10
  -6 -15  -2   20.70    2.90
  -6  15  -2   18.70    2.60
  -6  15  -2   20.10    2.20
   6  15   2   18.90    2.60
  -7 -15  -2   76.29    5.00
   7  15   2   83.79    4.80
  -7  15  -2   83.19    4.10
  -8 -15  -2   15.20    2.90
   8  15   2   14.40    2.40
  -8  15  -2   12.30    1.80
  -8 -16   2   18.90    3.20
  -7 -16   2    0.80    1.60
   7  16  -2    2.00    1.40
  -6 -16   2   51.49    4.00
   6  16  -2   43.50    3.60
  -6  16   2   39.70    2.40
  -5 -16   2   18.80    2.60
   5  16  -2   16.40    2.40
  -5  16   2   17.90    1.80
  -4 -16   2   97.39    5.00
  -4  16   2   86.59    3.90
   4  16  -2   90.99    4.90
  -3 -16   2   17.20    2.20
  -3  16   2   18.90    2.00
   3  16  -2   19.10    2.50
  -2 -16   2  107.59    4.80
   2  16  -2   98.89    5.10
  -2  16   2  103.49    4.60
  -1 -16   2   84.19    4.00
   1  16  -2   84.29    4.50
  -1  16   2   81.69    4.00
   0 -16   2   52.29    3.10
   0  16  -2   53.79    3.70
   0  16   2   56.89    3.30
   0  16  -2   47.60    3.40
   1  16   2   30.60    2.60
  -1  16  -2   26.90    3.10
  -1  16  -2   32.10    2.60
  -2 -16  -2    1.40    0.90
  -2  16  -2    1.30    1.10
   2  16   2    1.20    1.10
  -2  16  -2    4.60    1.50
  -3 -16  -2    2.20    1.20
  -3  16  -2    0.40    1.10
  -3  16  -2    1.20    1.00
   3  16   2    1.90    1.30
  -4 -16  -2  121.39    5.60
   4  16   2  118.69    5.60
  -4  16  -2  109.09    5.00
  -4  16  -2  108.29    5.70
  -5 -16  -2   -0.30    1.20
  -5  16  -2    0.20    0.90
   5  16   2    0.00    1.10
  -5  16  -2    0.10    1.10
  -6 -16  -2   29.50    3.30
   6  16   2   28.60    3.20
  -6  16  -2   28.20    3.20
  -6  16  -2   30.20    2.50
  -7 -16  -2    1.60    1.60
   7  16   2    0.70    1.30
  -7  16  -2   -0.10    1.00
  -8 -16  -2   61.09    4.90
   8  16   2   66.49    4.40
  -8  16  -2   64.19    3.80
  -7 -17   2   67.09    4.90
   7  17  -2   61.69    4.30
  -6 -17   2   -0.20    1.50
   6  17  -2    2.00    1.50
  -6  17   2    2.30    0.90
  -5 -17   2   16.20    2.50
   5  17  -2   18.50    2.60
  -5  17   2   16.90    1.90
  -4 -17   2    3.30    1.50
   4  17  -2    5.80    1.80
  -4  17   2    3.20    1.10
  -3 -17   2   17.30    2.40
   3  17  -2   17.40    2.40
  -3  17   2   20.50    2.10
  -2 -17   2   -0.80    1.00
   2  17  -2    0.60    1.20
  -2  17   2   -0.10    0.90
  -1 -17   2   71.89    3.70
   1  17  -2   70.69    4.30
  -1  17   2   73.99    3.90
   0  17   2    0.40    1.00
   0  17  -2    0.50    1.10
   1  17   2  145.59    6.10
  -1  17  -2  134.29    6.10
  -1  17  -2  142.19    6.70
   2  17   2   12.30    2.10
  -2  17  -2   11.40    2.20
  -2  17  -2   13.00    2.10
  -3 -17  -2   23.60    2.60
  -3  17  -2   19.70    2.40
   3  17   2   23.40    2.80
  -3  17  -2   21.10    2.80
  -4 -17  -2   10.70    2.10
  -4  17  -2   12.20    2.30
  -4  17  -2    9.20    1.70
   4  17   2   10.50    2.10
  -5 -17  -2   15.80    2.50
   5  17   2   16.20    2.50
  -5  17  -2   16.30    2.40
  -5  17  -2   20.80    2.40
  -6 -17  -2   24.10    3.10
  -6  17  -2   20.90    2.40
   6  17   2   16.70    2.60
  -6  17  -2   21.10    2.90
  -7 -17  -2   30.50    3.70
   7  17   2   34.80    3.80
  -7  17  -2   36.80    2.90
  -7 -18   2    3.70    2.00
   7  18  -2    1.60    1.50
  -6 -18   2    6.00    2.10
   6  18  -2    3.20    1.80
  -6  18   2    4.90    1.20
  -5 -18   2    3.00    1.70
  -5  18   2    2.90    1.10
   5  18  -2    4.50    1.90
  -4 -18   2   58.99    4.00
   4  18  -2   57.99    4.10
  -4  18   2   61.29    3.40
  -3 -18   2   -0.80    1.10
   3  18  -2    0.60    1.20
  -3  18   2   -0.10    0.90
  -2 -18   2   69.69    4.00
   2  18  -2   71.49    4.40
  -2  18   2   65.09    3.70
  -1  18   2    4.50    1.40
   1  18  -2    3.90    1.50
   0  18   2   73.79    4.20
   0  18  -2   73.69    4.40
   1  18   2    2.40    1.30
  -1  18  -2    2.60    1.50
  -1  18  -2    3.40    1.40
  -2  18  -2   10.30    1.90
  -2  18  -2    6.70    1.90
   2  18   2    9.00    1.90
   3  18   2   -0.80    1.10
  -3  18  -2    2.70    1.50
  -3  18  -2    1.10    1.10
  -4 -18  -2   17.10    2.40
   4  18   2   15.60    2.50
  -4  18  -2   15.00    2.20
  -4  18  -2   17.00    2.70
  -5 -18  -2    1.30    1.40
   5  18   2   -0.60    1.30
  -5  18  -2   -0.10    1.20
  -5  18  -2    2.60    1.30
  -6 -18  -2    3.50    1.80
   6  18   2    0.80    1.40
  -6  18  -2    2.40    1.30
  -6  18  -2    4.30    1.70
  -7 -18  -2   -2.20    1.40
   7  18   2    0.90    1.50
  -7  18  -2    0.80    1.10
  -6 -19   2    3.20    2.00
   6  19  -2    3.10    1.70
  -6  19   2    2.40    1.10
  -5 -19   2    7.90    2.10
   5  19  -2    7.60    2.10
  -5  19   2    9.00    1.60
  -4 -19   2    0.30    1.40
   4  19  -2    0.80    1.50
  -4  19   2   -0.40    0.90
  -3  19   2   22.70    2.50
   3  19  -2   23.40    3.00
  -2  19   2    5.90    1.50
   2  19  -2    5.10    1.80
  -1  19   2  110.59    5.30
   1  19  -2  110.69    5.70
   0  19  -2   37.80    3.30
   0  19   2   38.90    3.20
   1  19   2   11.30    2.10
  -1  19  -2   10.30    2.00
   2  19   2    0.10    1.20
  -2  19  -2   -0.80    1.10
  -2  19  -2   -0.10    1.00
  -3  19  -2    5.70    1.70
   3  19   2    4.90    1.70
  -3  19  -2    5.50    1.80
  -4  19  -2   12.80    2.40
   4  19   2   16.30    2.70
  -4  19  -2   14.20    2.30
  -5  19  -2    5.60    1.60
   5  19   2    4.00    1.90
  -5  19  -2    7.40    2.10
  -6 -19  -2    1.70    1.60
  -6  19  -2    0.30    1.10
   6  19   2   -0.80    1.40
  -5 -20   2    1.30    1.60
  -5  20   2    1.40    1.10
   5  20  -2   -0.50    1.30
   4  20  -2   20.70    2.90
  -4  20   2   22.30    2.50
  -3  20   2    1.40    1.20
   3  20  -2    3.10    1.70
   2  20  -2   93.99    5.50
  -2  20   2   94.89    4.90
  -1  20   2    0.70    1.20
   1  20  -2    2.50    1.50
   0  20  -2    2.80    1.50
   0  20   2    0.90    1.20
  -1  20  -2    1.20    1.30
   1  20   2   -0.60    1.10
  -2  20  -2   11.50    2.10
   2  20   2   14.70    2.40
  -3  20  -2   25.80    3.00
   3  20   2   31.60    3.50
  -3  20  -2   28.70    3.60
  -4  20  -2    1.00    1.30
  -4  20  -2    3.20    1.70
   4  20   2    0.20    1.50
  -5  20  -2    1.30    1.30
   5  20   2    2.40    1.70
  -5  20  -2    2.70    1.70
   4  21  -2    0.10    1.50
  -4  21   2    0.30    1.10
   3  21  -2   21.70    3.10
  -3  21   2   22.70    2.70
   2  21  -2    5.20    2.00
  -2  21   2    4.90    1.60
   1  21  -2   27.70    3.30
  -1  21   2   22.80    2.90
   0  21   2   -0.20    1.20
   0  21  -2    0.00    1.30
   1  21   2    5.00    1.70
  -1  21  -2    4.60    1.70
   2  21   2   -1.60    1.20
  -2  21  -2    0.90    1.30
  -3  21  -2   21.50    2.80
   3  21   2   24.90    3.30
   4  21   2    2.30    1.70
  -4  21  -2    1.40    1.40
  -3  22   2    0.30    1.20
   3  22  -2    2.20    1.70
  -2  22   2    0.30    1.20
   2  22  -2    0.60    1.50
   1  22  -2    3.80    1.80
  -1  22   2    2.20    1.50
   0  22   2   21.80    3.00
   0  22  -2   22.20    3.10
  -1  22  -2    0.80    1.40
   1  22   2    1.60    1.40
   2  22   2    3.30    1.70
  -2  22  -2    2.70    1.60
  -3  22  -2   -1.20    1.20
   3  22   2    1.30    1.60
  -1  23   2   24.10    3.10
   1  23  -2   20.30    3.20
   0  23  -2    9.50    2.30
   0  23   2    5.70    1.90
  -1  23  -2    0.00    1.30
   1  23   2   -1.50    1.20
 -11   0   3   57.09    3.80
 -11   0   3   48.30    3.60
 -10   0   3    0.00    1.00
  -9   0   3    6.10    1.40
  -8   0   3    0.70    0.90
  -7   0   3   79.69    3.10
  -7   0   3   83.19    3.70
  -6   0   3   -0.50    0.40
  -6   0   3    0.10    0.40
  -6   0   3    0.00    0.60
  -5   0   3    0.60    0.40
  -5   0   3    0.90    0.60
  -5   0   3    1.30    0.40
  -4   0   3    0.10    0.30
  -4   0   3    0.10    0.30
  -4   0   3   -0.20    0.40
  -3   0   3 3887.41   98.89
  -3   0   3 3288.97   98.59
  -3   0   3 3899.01   99.29
   2   0  -3    0.00    0.10
  -2   0   3    1.10    0.30
  -2   0   3    0.30    0.30
   2   0  -3    0.00    0.10
   2   0  -3    0.30    0.20
  -1   0   3 1141.99   31.70
   1   0  -3 1181.28   31.60
  -1   0   3 1209.48   31.70
   1   0  -3 1152.48   31.60
   0   0  -3    0.50    0.30
   0   0  -3    0.50    0.30
   0   0   3    1.00    0.40
   1   0   3 3540.15   94.99
   1   0   3 3552.14   94.99
  -1   0  -3 3541.45   94.79
  -1   0  -3 3404.66   95.29
  -2   0  -3    0.00    0.10
   2   0   3   -0.10    0.30
  -4   0  -3    0.50    0.50
   4   0   3    0.10    0.40
  -5   0  -3   23.50    1.80
   5   0   3   26.10    1.50
  -6   0  -3    0.70    0.80
   6   0   3    0.80    0.60
  -7   0  -3  123.89    5.20
  -8   0  -3   -0.20    1.00
  -9   0  -3    1.90    1.20
 -10   0  -3   -0.30    1.20
 -11   0  -3   50.29    3.90
 -11  -1   3    0.30    1.20
 -11  -1   3   -0.90    1.10
 -11   1   3    0.90    1.10
 -11   1   3    1.60    1.20
 -10  -1   3    1.80    1.20
 -10   1   3    2.30    1.10
  -9  -1   3    4.50    1.30
  -9   1   3    4.80    1.30
  -8  -1   3   91.89    4.30
  -8   1   3   92.79    4.10
  -7  -1   3   73.09    3.40
  -7  -1   3   63.99    2.80
  -7   1   3   65.19    2.60
  -7   1   3   67.59    3.10
  -6  -1   3   49.60    2.30
  -6  -1   3   55.99    2.80
  -6   1   3   53.19    2.50
  -6   1   3   49.40    2.00
  -6   1   3   47.10    2.10
  -5  -1   3   73.59    3.10
  -5  -1   3   68.29    2.80
  -5  -1   3   74.09    2.80
  -5   1   3   74.19    2.40
  -5   1   3   71.29    2.60
  -5   1   3   75.79    2.80
  -4  -1   3  322.27    9.40
  -4  -1   3  334.77    9.60
  -4  -1   3  327.67    9.80
   4   1  -3  317.67    8.90
  -4   1   3  331.47    9.20
  -4   1   3  337.37    9.00
  -4   1   3  327.37    9.40
  -3  -1   3    0.80    0.40
  -3  -1   3    0.50    0.30
  -3  -1   3    1.10    0.50
   3   1  -3    2.00    0.30
  -3   1   3    1.00    0.20
  -3   1   3    1.70    0.30
  -2  -1   3 1349.07   36.50
   2  -1  -3 1371.16   36.10
  -2  -1   3 1328.97   36.70
   2   1  -3 1350.06   36.50
  -2   1   3 1386.06   36.20
   2   1  -3 1326.67   36.40
  -2   1   3 1330.17   36.20
   1  -1  -3 1838.92   48.20
  -1  -1   3 1748.63   48.60
   1  -1  -3 1843.02   48.30
  -1  -1   3 1762.52   48.50
   1   1  -3 1805.82   48.50
   1   1  -3 1784.92   48.50
  -1   1   3 1807.12   48.60
  -1   1   3 1807.42   48.40
   0  -1   3 1235.38   33.00
   0  -1   3 1236.68   33.10
   0  -1  -3 1220.68   32.90
   0  -1  -3 1233.58   32.90
   0   1   3 1196.68   32.90
   0   1  -3 1204.78   33.00
   0   1   3 1216.68   32.90
   0   1  -3 1192.28   33.00
  -1  -1  -3 1797.92   48.40
   1  -1   3 1800.12   48.50
  -1   1  -3 1833.72   48.50
   1   1   3 1787.32   48.40
  -1   1  -3 1752.82   48.40
  -2  -1  -3 1766.52   51.99
   2  -1   3 1955.50   51.99
  -2   1  -3 1954.70   51.89
  -2   1  -3 2007.10   52.19
   2   1   3 1922.61   51.89
   3  -1   3   14.10    1.10
   3   1   3   15.40    1.10
  -3   1  -3   16.60    1.20
   4  -1   3   91.19    3.30
  -4  -1  -3   90.79    3.60
  -4   1  -3   92.39    3.50
   4   1   3   90.59    3.40
  -5  -1  -3    0.50    0.70
   5  -1   3    0.30    0.40
  -5   1  -3    0.70    0.60
   5   1   3    0.70    0.50
  -6  -1  -3  396.06   12.50
   6  -1   3  395.96   11.60
   6   1   3  415.56   11.90
  -6   1  -3  396.46   12.30
  -7  -1  -3   13.00    1.80
   7   1   3   14.00    1.40
  -7   1  -3   11.20    1.70
  -8  -1  -3    1.00    1.10
  -8   1  -3    1.30    1.00
  -9  -1  -3    0.10    1.00
  -9   1  -3    0.00    1.00
 -10  -1  -3   38.10    3.40
 -10   1  -3   43.10    3.40
 -11  -1  -3    2.60    1.60
 -11   1  -3    4.80    1.80
 -11  -2   3   18.50    2.60
 -11  -2   3   21.30    2.80
 -11   2   3   18.70    2.40
 -11   2   3   18.20    2.30
 -10  -2   3   -1.20    1.00
 -10   2   3   -0.30    0.80
  -9  -2   3   -1.10    0.90
  -9   2   3    1.30    0.90
  -8  -2   3    2.30    1.10
  -8   2   3    4.60    1.10
  -7  -2   3  133.59    5.40
  -7  -2   3  139.39    4.90
  -7   2   3  130.49    4.80
  -6  -2   3  119.69    4.30
  -6  -2   3  122.49    4.80
  -6   2   3  123.29    4.20
  -6   2   3  117.19    3.90
  -5  -2   3   17.00    1.70
  -5  -2   3   24.20    1.40
   5   2  -3   20.30    1.00
  -5   2   3   21.50    0.90
  -5   2   3   21.50    1.20
  -5   2   3   20.40    1.00
  -4  -2   3    4.60    0.90
  -4  -2   3    5.30    0.90
  -4  -2   3    4.60    0.70
  -4   2   3    5.40    0.40
  -4   2   3    5.60    0.50
   4   2  -3    5.80    0.60
  -3  -2   3  595.44   16.30
  -3  -2   3  587.94   16.60
  -3  -2   3  572.34   16.30
   3   2  -3  566.54   16.00
  -2  -2   3    6.60    0.70
  -2  -2   3    6.10    0.80
  -2  -2   3    5.70    0.70
   2   2  -3    8.20    0.80
   2   2  -3    7.90    0.70
  -2   2   3    7.60    0.30
   1  -2  -3 1178.68   31.70
  -1  -2   3 1197.38   32.30
   1  -2  -3 1198.28   31.70
  -1   2   3 1209.68   32.00
  -1   2   3 1196.58   31.90
   1   2  -3 1163.08   32.30
   1   2  -3 1169.28   32.30
   0  -2   3  536.95   14.80
   0  -2   3  520.15   14.60
   0  -2  -3  522.25   14.40
   0  -2  -3  507.35   14.40
   0   2  -3  522.25   14.70
   0   2   3  546.95   14.50
   0   2   3  511.15   14.50
   1  -2   3  292.57    8.90
  -1  -2  -3  303.47    8.80
  -1   2  -3  303.37    8.90
   1   2   3  300.07    8.70
   1   2   3  320.67    9.10
   2  -2   3    3.70    0.60
  -2  -2  -3    4.30    0.70
  -2   2  -3    3.40    0.60
  -2   2  -3    3.80    0.60
   2   2   3    4.60    0.60
   3  -2   3  236.48    7.20
  -3   2  -3  236.58    7.30
   3   2   3  241.78    7.30
  -4  -2  -3   73.69    3.30
   4  -2   3   80.19    3.00
   4   2   3   81.79    3.10
  -4   2  -3   84.89    3.20
  -5  -2  -3  190.48    6.70
   5  -2   3  189.68    5.90
   5   2   3  189.38    6.30
  -5   2  -3  201.48    6.50
   6  -2   3    0.80    0.40
  -6  -2  -3   -0.50    0.70
  -6   2  -3    0.60    0.70
   6   2   3    1.10    0.60
  -7  -2  -3  225.48    8.00
   7   2   3  219.48    7.20
  -7   2  -3  213.08    7.60
  -8  -2  -3    8.90    1.70
  -8   2  -3    8.80    1.60
  -9  -2  -3   -0.60    1.10
  -9   2  -3    1.50    1.10
 -10  -2  -3   -0.90    1.20
 -10   2  -3   -1.10    1.00
 -11  -2  -3   41.70    4.00
 -11   2  -3   36.70    3.60
 -11  -3   3   -0.60    1.20
 -11  -3   3    2.40    1.50
 -11   3   3    0.80    1.10
 -10  -3   3    0.90    1.20
 -10   3   3    3.40    1.10
  -9  -3   3   20.40    2.50
  -9   3   3   20.90    2.00
  -8  -3   3  180.98    7.10
  -8   3   3  184.68    6.30
  -7  -3   3   39.00    2.70
  -7  -3   3   38.80    2.30
  -7   3   3   37.20    2.00
  -6  -3   3  271.67    9.00
  -6  -3   3  271.17    8.60
  -6   3   3  253.17    7.70
   6   3  -3  280.57    7.80
  -6   3   3  272.97    8.00
  -5  -3   3   22.30    1.80
  -5  -3   3   19.60    1.50
   5   3  -3   20.20    1.20
  -5   3   3   19.30    0.80
  -5   3   3   19.90    0.90
  -4  -3   3  860.11   24.10
  -4  -3   3  840.42   23.60
   4   3  -3  840.62   23.30
  -3  -3   3   93.39    3.70
  -3  -3   3   94.99    3.40
   3   3  -3   91.59    3.20
  -2  -3   3  567.24   15.50
  -2  -3   3  520.05   15.60
   2  -3  -3  541.85   14.80
   2   3  -3  562.44   15.50
   2   3  -3  545.25   15.40
  -1  -3   3  113.59    4.00
   1   3  -3  111.69    3.90
   1   3  -3  124.29    3.90
  -1   3   3  119.09    3.40
  -1   3   3  116.59    3.50
   0  -3  -3  147.49    4.50
   0  -3  -3  150.68    4.40
   0  -3   3  143.29    4.80
   0   3   3  150.18    4.40
   0   3   3  149.79    4.50
   0   3  -3  138.99    4.70
   1  -3   3 3593.14   96.29
  -1  -3  -3 3526.65   96.79
  -1   3  -3 3631.54   96.29
   2  -3   3   42.70    1.90
  -2  -3  -3   43.00    2.00
   2   3   3   44.00    1.90
  -2   3  -3   41.20    1.80
  -2   3  -3   43.60    1.90
   3  -3   3   31.70    1.60
  -3  -3  -3   31.30    1.80
  -3   3  -3   30.40    1.60
  -3   3  -3   29.00    1.60
   4  -3   3 1322.57   36.40
  -4   3  -3 1351.26   36.70
   5  -3   3  126.69    3.90
  -5  -3  -3  119.69    4.80
  -5   3  -3  122.29    4.50
  -6   3  -3  342.77   10.60
   6   3   3  340.37   10.50
  -7  -3  -3   84.49    4.20
  -7   3  -3   79.79    3.80
   7   3   3   81.19    3.50
  -8  -3  -3  191.98    7.60
  -8   3  -3  199.88    7.30
  -9  -3  -3    3.20    1.50
  -9   3  -3    3.80    1.30
 -10  -3  -3    5.50    1.80
 -10   3  -3    4.30    1.50
 -11  -3  -3    1.40    1.60
 -11   3  -3    1.30    1.30
 -11  -4   3   24.50    3.10
 -11  -4   3   29.80    3.40
 -11   4   3   27.50    2.60
 -10  -4   3    2.30    1.40
 -10   4   3    1.80    1.00
  -9  -4   3   83.49    4.50
  -9   4   3   75.19    3.50
  -8  -4   3   67.39    3.90
  -8   4   3   67.59    3.00
  -7  -4   3   72.09    3.80
  -7  -4   3   68.49    3.30
  -7   4   3   65.49    2.70
  -6  -4   3   22.30    1.70
  -6  -4   3   20.80    2.00
  -6   4   3   20.10    1.10
   6   4  -3   23.60    1.40
  -6   4   3   21.10    0.90
  -5  -4   3  302.37    9.60
  -5  -4   3  301.87    9.90
   5   4  -3  316.37    9.10
  -4  -4   3    3.50    0.90
  -4  -4   3    5.60    0.90
   4   4  -3    4.70    0.80
  -3  -4   3  425.36   12.40
  -3  -4   3  411.66   12.60
   3   4  -3  428.16   12.20
  -2  -4   3    4.10    0.70
   2  -4  -3    2.70    0.40
   2   4  -3    4.60    0.70
   2   4  -3    2.10    0.60
  -1  -4   3 1756.62   49.20
  -1   4   3 1815.42   48.40
   1   4  -3 1811.52   49.10
  -1   4   3 1852.11   48.40
   1   4  -3 1782.72   49.00
   0  -4  -3   82.19    2.70
   0  -4   3   81.19    3.10
   0   4   3   78.29    2.80
   0   4   3   84.69    2.80
   0   4  -3   88.69    3.10
  -1  -4  -3 2349.46   62.49
   1  -4   3 2283.97   62.69
  -1   4  -3 2320.17   62.59
   2  -4   3  617.14   17.20
  -2  -4  -3  558.74   17.30
  -2   4  -3  622.94   17.20
  -2   4  -3  644.64   17.30
  -3  -4  -3   38.10    2.10
   3  -4   3   32.90    1.60
  -3   4  -3   31.90    1.70
  -3   4  -3   34.00    1.70
   3   4   3   32.20    1.80
   4  -4   3  317.67    9.10
  -4  -4  -3  315.37   10.00
   4   4   3  320.17    9.70
  -4   4  -3  317.17    9.50
  -5  -4  -3   -0.20    0.60
  -5   4  -3    1.20    0.60
   5   4   3    0.20    0.70
  -6  -4  -3    0.20    0.30
  -6   4  -3    1.10    0.70
   6   4   3    2.10    0.80
  -7  -4  -3  508.65   15.70
  -7   4  -3  486.25   14.90
  -8  -4  -3   20.00    2.50
  -8   4  -3   19.80    2.10
  -9  -4  -3    4.00    1.60
  -9   4  -3    2.80    1.20
 -10  -4  -3    0.30    1.40
 -10   4  -3   -0.10    1.10
 -11  -4  -3   35.80    3.90
 -11   4  -3   32.70    3.30
 -11  -5   3    1.70    1.60
 -11  -5   3    2.20    1.60
 -11   5   3    1.10    1.10
 -10  -5   3   31.20    3.30
 -10  -5   3   36.70    3.60
 -10   5   3   28.80    2.30
  -9  -5   3    4.20    1.50
  -9   5   3    2.10    0.90
  -8  -5   3  111.09    5.30
  -8   5   3  108.59    4.00
  -7  -5   3    1.40    0.80
  -7  -5   3    2.60    1.10
  -7   5   3    1.00    0.50
  -6  -5   3  349.87   11.00
  -6  -5   3  350.16   11.30
   6   5  -3  339.87   10.30
  -5  -5   3  258.97    8.40
  -5  -5   3  259.17    8.80
   5   5  -3  259.47    8.00
  -4  -5   3  105.09    4.10
  -4  -5   3  101.49    4.30
   4   5  -3  109.89    3.90
  -3  -5   3  210.68    6.70
   3   5  -3  194.78    6.40
   2  -5  -3  216.68    6.30
  -2  -5   3  226.18    6.90
  -2  -5   3  179.78    6.80
   2   5  -3  229.68    6.80
  -1  -5   3 1000.30   29.00
  -1  -5   3 1100.39   29.00
  -1   5   3 1075.39   28.20
   1   5  -3  975.60   28.80
  -1   5   3 1054.49   28.20
   0  -5  -3   50.69    1.90
   0  -5   3   55.29    2.40
   0   5   3   51.19    2.00
   0   5   3   51.29    2.00
  -1  -5  -3  181.28    5.60
   1  -5   3  179.78    5.80
  -1   5  -3  175.08    5.70
   2  -5   3   41.80    1.90
   2   5   3   42.40    2.00
  -2   5  -3   42.70    1.90
  -2   5  -3   37.40    2.10
  -3  -5  -3  874.81   24.70
   3  -5   3  866.91   24.00
  -3   5  -3  899.01   24.40
  -3   5  -3  857.01   24.20
   3   5   3  872.91   24.50
   4  -5   3  161.68    4.80
  -4  -5  -3  168.58    6.00
  -4   5  -3  172.28    5.90
   4   5   3  170.48    5.70
  -4   5  -3  155.68    5.40
  -5  -5  -3  374.06   11.80
  -5   5  -3  365.86   11.10
   5   5   3  373.36   11.30
   6   5   3  272.47    8.80
  -6   5  -3  274.07    8.70
  -7  -5  -3   14.10    2.10
  -7   5  -3   12.70    1.60
   7   5   3   13.40    1.60
  -8  -5  -3  161.98    6.90
  -8   5  -3  158.98    6.10
  -9  -5  -3    0.20    1.30
  -9   5  -3    0.60    1.00
 -10  -5  -3   10.00    2.30
 -10   5  -3   14.40    2.10
 -11  -5  -3    2.00    1.70
 -11   5  -3    3.50    1.50
 -11  -6   3   25.00    3.40
 -11  -6   3   26.90    3.50
 -10  -6   3    1.60    1.40
 -10  -6   3    1.10    1.40
 -10   6   3    1.90    0.90
 -10   6   3    0.80    0.80
  -9  -6   3  127.49    6.00
  -9   6   3  119.59    4.50
  -8  -6   3   21.20    2.60
  -8   6   3   21.40    1.50
  -7  -6   3   45.80    3.20
  -7   6   3   47.10    1.80
   7   6  -3   50.59    2.40
  -6  -6   3   13.80    1.70
  -6  -6   3   17.70    2.10
   6   6  -3   18.20    1.50
   5   6  -3  142.49    5.00
  -3  -6   3    6.10    1.00
   2  -6  -3  150.48    4.90
  -2  -6   3  159.48    5.50
  -2  -6   3  155.48    5.60
   2   6  -3  157.28    5.50
  -1  -6   3 1206.08   33.00
  -1   6   3 1186.98   32.10
  -1   6   3 1162.78   32.10
   0  -6   3  279.27    8.70
   0  -6  -3  277.17    8.10
   0   6   3  287.37    8.30
   0   6   3  281.07    8.30
  -1  -6  -3  665.43   18.60
   1  -6   3  660.33   18.80
  -1   6  -3  649.04   18.80
  -1   6  -3  684.03   19.20
   1   6   3  663.13   18.70
   2  -6   3  319.17    9.30
   2   6   3  308.17    9.50
  -2   6  -3  316.77    9.40
  -3  -6  -3 1663.33   45.40
   3  -6   3 1672.43   44.50
   3   6   3 1667.53   45.20
  -3   6  -3 1641.44   45.20
  -3   6  -3 1590.64   44.90
  -4  -6  -3   62.69    3.20
  -4   6  -3   64.79    2.70
  -4   6  -3   59.59    2.90
   4   6   3   59.39    2.90
  -5  -6  -3   99.59    4.60
   5   6   3  113.99    4.40
  -5   6  -3  114.99    4.10
  -6  -6  -3    4.40    1.30
  -6   6  -3    2.40    0.80
  -7  -6  -3   77.39    4.30
   7   6   3   74.79    3.60
  -7   6  -3   77.89    3.60
  -8  -6  -3    2.20    1.30
  -8   6  -3    1.00    1.00
  -9  -6  -3   16.20    2.50
  -9   6  -3   14.50    2.00
 -10  -6  -3    1.40    1.50
 -10   6  -3   -0.90    1.00
 -10  -7   3   55.49    4.30
 -10  -7   3   59.39    4.20
  -9  -7   3    4.30    1.60
  -9   7   3    0.90    0.70
  -8  -7   3   50.79    3.50
  -8   7   3   40.70    1.90
  -7  -7   3   79.09    4.20
   7   7  -3   69.89    3.20
  -6  -7   3  281.57    9.80
  -5  -7   3   38.10    2.50
   5   7  -3   37.80    2.20
  -4  -7   3  188.68    6.80
  -4  -7   3  186.88    6.90
   4   7  -3  195.88    6.50
  -3  -7   3   12.10    1.50
  -3  -7   3    7.60    1.20
   3  -7  -3   11.90    1.00
   3   7  -3   12.00    1.40
   2  -7  -3   42.30    2.00
  -2  -7   3   45.60    2.40
  -2  -7   3   44.90    2.50
   2   7  -3   44.80    2.50
   2   7  -3   42.40    2.30
  -2   7   3   48.70    1.60
  -2   7   3   46.10    1.50
   1  -7  -3  510.75   14.40
  -1  -7   3  502.45   14.90
   1   7  -3  483.25   14.80
   1   7  -3  495.25   14.60
  -1   7   3  495.45   13.90
  -1   7   3  502.55   14.00
   0  -7  -3  624.04   18.10
   0  -7   3  675.13   18.80
   0   7   3  659.93   18.50
   0   7   3  665.73   18.40
   1  -7   3   15.00    1.20
  -1  -7  -3   13.90    1.20
  -1   7  -3   13.00    1.50
  -1   7  -3   13.70    1.30
   1   7   3   15.60    1.30
   2  -7   3   76.99    2.90
   2   7   3   78.89    3.20
  -2   7  -3   77.89    3.10
   3  -7   3   21.80    1.10
  -3  -7  -3   22.50    1.90
  -3   7  -3   22.20    1.60
   3   7   3   22.30    1.70
  -4  -7  -3  951.90   27.30
   4   7   3  967.80   27.10
  -4   7  -3  947.21   26.60
  -5  -7  -3    2.70    1.10
   5   7   3    1.60    0.80
  -5   7  -3    2.60    0.80
  -6  -7  -3   95.99    4.70
   6   7   3   93.59    4.20
  -6   7  -3   98.39    3.90
  -7  -7  -3   14.50    2.20
   7   7   3   14.80    1.80
  -7   7  -3   20.90    1.90
  -8  -7  -3   60.69    4.00
   8   7   3   60.39    3.60
  -8   7  -3   59.99    3.20
  -9  -7  -3    5.10    1.80
  -9   7  -3    6.80    1.50
 -10  -7  -3   13.10    2.60
 -10   7  -3   15.30    2.10
 -10  -8   3    5.00    1.90
 -10  -8   3    3.40    1.80
  -9  -8   3  195.48    8.30
  -8  -8   3   10.30    2.00
  -8   8   3   10.20    0.90
  -7  -8   3   56.69    3.70
   7   8  -3   54.49    2.90
  -6  -8   3   60.39    3.60
   6   8  -3   58.89    3.00
  -5  -8   3   53.99    3.30
   5   8  -3   66.89    3.20
  -4  -8   3   12.70    1.70
  -4  -8   3   10.20    1.50
   4   8  -3    9.80    1.30
  -3  -8   3  359.76   11.00
   3  -8  -3  328.27   10.10
  -3  -8   3  351.66   11.00
   3   8  -3  327.67   10.60
  -2  -8   3    3.30    0.90
   2  -8  -3    4.10    0.70
  -2  -8   3    3.00    0.90
  -2   8   3    4.20    0.50
   2   8  -3    2.80    0.80
  -2   8   3    3.80    0.50
   2   8  -3    4.60    1.10
  -1  -8   3    1.30    0.70
  -1  -8   3    3.10    0.90
   1  -8  -3    1.70    0.60
  -1   8   3    1.40    0.50
  -1   8   3    1.80    0.50
   1   8  -3    4.10    0.90
   1   8  -3    1.90    0.80
   0  -8   3  118.39    4.40
   0  -8  -3  116.59    3.80
   0   8   3  116.89    4.10
  -1  -8  -3 2129.99   58.49
   1  -8   3 2163.08   58.59
   1   8   3 2130.19   58.69
  -1   8  -3 2189.58   59.29
  -1   8  -3 2182.38   58.89
  -2  -8  -3    4.30    0.90
   2  -8   3    4.90    0.70
  -2   8  -3    6.90    1.30
   2   8   3    4.90    1.00
  -2   8  -3    6.70    1.00
   3  -8   3   25.20    1.10
  -3  -8  -3   24.60    1.90
  -3   8  -3   25.10    1.70
   3   8   3   20.90    1.70
  -4  -8  -3    0.40    0.80
   4   8   3    0.70    0.70
  -4   8  -3    0.90    0.60
  -5  -8  -3   45.40    3.00
  -5   8  -3   48.80    2.40
   5   8   3   54.39    2.90
  -6  -8  -3    8.50    1.80
  -6   8  -3    6.70    1.10
   6   8   3    8.80    1.40
  -7  -8  -3   12.10    2.10
   7   8   3   10.80    1.70
  -7   8  -3   12.80    1.60
  -8  -8  -3    1.40    1.30
  -8   8  -3    2.30    1.00
   8   8   3    2.50    1.10
  -9  -8  -3   30.50    3.50
  -9   8  -3   29.80    2.40
 -10  -8  -3    1.30    1.70
 -10   8  -3    1.90    1.20
 -10  -9   3   21.30    3.10
 -10  -9   3   25.00    3.30
  -9  -9   3    3.40    1.70
  -9  -9   3   -0.30    1.40
  -8  -9   3   30.90    3.40
  -7  -9   3    2.30    1.30
   7   9  -3    1.40    0.90
  -6  -9   3   59.79    3.70
   6   9  -3   62.49    3.30
  -5  -9   3   15.60    2.10
   5   9  -3   14.80    1.70
  -4  -9   3    8.10    1.50
   4   9  -3    6.20    1.20
  -3  -9   3  174.78    6.50
  -3  -9   3  160.38    6.30
   3  -9  -3  169.68    5.70
  -3   9   3  163.48    4.80
   3   9  -3  171.38    6.20
  -3   9   3  179.48    4.90
   2  -9  -3   72.39    3.20
  -2  -9   3   76.79    3.70
  -2  -9   3   75.59    3.60
  -2   9   3   72.09    2.70
  -2   9   3   78.99    2.70
   2   9  -3   74.59    3.50
   2   9  -3   79.49    3.80
   1  -9  -3   37.10    2.10
  -1  -9   3   33.00    2.20
  -1  -9   3   33.00    2.40
   1   9  -3   38.20    2.50
  -1   9   3   36.80    1.80
   1   9  -3   34.40    2.20
  -1   9   3   37.40    1.80
   0  -9  -3 1038.80   29.00
   0  -9   3 1032.10   28.80
   0  -9  -3 1021.10   28.00
   0   9  -3 1054.99   29.40
   0   9   3  989.90   28.40
   1  -9   3  140.69    4.70
  -1  -9  -3  134.79    4.70
   1   9   3  135.09    4.90
  -1   9  -3  133.39    5.40
  -1   9  -3  134.09    5.00
   2  -9   3    0.30    0.40
  -2  -9  -3    0.10    0.60
  -2   9  -3    0.00    0.50
   2   9   3    1.40    0.70
  -2   9  -3    0.00    0.70
  -3  -9  -3   82.09    3.70
   3  -9   3   78.79    2.40
   3  -9   3   77.39    2.40
  -3   9  -3   84.49    4.00
   3   9   3   75.19    3.50
  -3   9  -3   78.49    3.30
  -4  -9  -3  404.56   12.50
   4   9   3  379.66   12.10
  -4   9  -3  388.36   11.80
  -5  -9  -3   29.60    2.50
  -5   9  -3   33.30    2.00
   5   9   3   26.60    2.20
  -6  -9  -3   10.10    1.90
  -6   9  -3   10.10    1.30
   6   9   3    8.60    1.50
  -7  -9  -3   11.10    2.10
   7   9   3   15.20    2.00
  -7   9  -3   13.60    1.60
  -8  -9  -3   18.60    2.70
   8   9   3   15.30    2.10
  -8   9  -3   20.40    2.10
  -9  -9  -3    2.30    1.60
  -9   9  -3    1.80    1.10
 -10  -9  -3   29.20    3.80
 -10   9  -3   32.90    2.70
 -10 -10   3    7.30    2.20
 -10 -10   3   11.10    2.50
  -9 -10   3   38.40    3.90
  -9 -10   3   31.60    3.50
  -8 -10   3   28.50    3.30
  -7 -10   3   12.30    2.20
   7  10  -3   11.90    1.80
  -6 -10   3   15.00    2.20
   6  10  -3   14.00    1.80
  -5 -10   3  110.99    5.20
   5  10  -3  111.49    4.80
  -4 -10   3    6.50    1.50
   4  10  -3    5.00    1.20
  -3 -10   3   79.49    3.90
   3 -10  -3   83.69    3.50
   3  10  -3   81.69    3.80
  -3  10   3   76.39    2.70
  -3  10   3   86.29    2.80
  -2 -10   3  283.57    9.70
   2 -10  -3  291.27    9.40
  -2  10   3  300.57    8.70
  -2  10   3  296.77    8.70
   2  10  -3  308.27    9.70
   2  10  -3  288.87    9.90
  -1 -10   3  392.46   11.90
   1 -10  -3  383.16   11.90
   1  10  -3  370.76   12.30
   1  10  -3  393.36   12.10
  -1  10   3  385.66   11.30
  -1  10   3  382.96   11.40
   0 -10   3    1.70    0.70
   0 -10  -3    3.30    0.60
   0 -10  -3    3.70    0.90
   0  10   3    1.90    0.70
   0  10  -3    2.10    1.00
   0  10  -3    1.70    0.70
   1 -10   3  445.26   13.00
  -1 -10  -3  441.86   13.00
   1  10   3  447.36   13.30
  -1  10  -3  437.76   14.00
  -1  10  -3  448.36   13.50
  -2 -10  -3   61.99    3.00
   2 -10   3   62.89    2.50
   2  10   3   62.59    3.10
  -2  10  -3   67.69    3.50
  -2  10  -3   66.29    3.10
  -3 -10  -3  172.18    6.30
   3  10   3  158.48    6.10
  -3  10  -3  169.48    6.50
  -3  10  -3  169.78    5.90
  -4 -10  -3   66.29    3.60
  -4  10  -3   59.69    3.50
  -4  10  -3   70.79    3.10
   4  10   3   62.79    3.40
  -5 -10  -3   12.10    1.90
  -5  10  -3   12.70    1.90
   5  10   3   12.50    1.80
  -5  10  -3   12.20    1.50
  -6 -10  -3    0.20    1.10
   6  10   3    2.50    1.10
  -6  10  -3    2.60    0.90
  -7 -10  -3    2.40    1.40
   7  10   3    2.90    1.20
  -7  10  -3    3.50    1.10
  -8 -10  -3    2.20    1.50
  -8  10  -3    0.60    0.80
   8  10   3    0.20    1.00
  -9 -10  -3   36.50    3.90
  -9  10  -3   46.00    3.00
 -10 -10  -3    1.50    1.70
 -10  10  -3    0.60    1.00
 -10 -11   3   12.80    2.60
 -10 -11   3   18.90    3.20
  -9 -11   3    2.30    1.70
  -9 -11   3    0.70    1.60
  -8 -11   3   21.50    2.90
  -8 -11   3   27.50    3.30
  -7 -11   3   13.90    2.30
   7  11  -3   15.50    2.10
  -6 -11   3    2.30    1.30
   6  11  -3    3.50    1.20
  -5 -11   3   15.50    2.10
   5  11  -3   19.20    2.10
  -4 -11   3  222.68    8.20
   4  11  -3  210.38    7.80
  -4  11   3  217.18    6.30
  -4  11   3  223.18    6.30
  -3 -11   3    9.40    1.60
   3 -11  -3    8.90    1.30
  -3  11   3   10.40    1.00
   3  11  -3    7.60    1.40
  -3  11   3    9.20    0.90
  -2 -11   3    4.70    1.20
   2 -11  -3    4.50    1.00
   2  11  -3    2.50    1.00
  -2  11   3    5.00    0.80
   2  11  -3    5.10    1.20
  -2  11   3    3.70    0.80
   1 -11  -3  457.25   14.00
  -1 -11   3  450.55   13.90
   1  11  -3  461.65   14.10
  -1  11   3  457.35   13.40
   0 -11  -3  433.96   11.90
   0 -11  -3  418.86   13.00
   0  11  -3  425.66   13.40
   0  11   3  431.66   12.50
   0  11  -3  358.76   12.60
  -1 -11  -3   -0.10    0.60
   1 -11   3    0.00    0.50
  -1  11  -3    0.20    0.90
   1  11   3    0.30    0.70
  -1  11  -3    5.50    1.20
  -2 -11  -3    0.70    0.70
   2 -11   3    1.60    0.50
   2 -11   3    1.10    0.50
  -2  11  -3    0.70    0.90
  -2  11  -3   -0.10    0.60
  -3 -11  -3    0.70    0.90
  -3  11  -3    1.10    0.90
  -3  11  -3    0.30    0.70
   3  11   3    0.10    0.70
  -4 -11  -3   36.80    2.70
   4  11   3   37.00    2.60
  -4  11  -3   32.90    2.60
  -4  11  -3   32.70    2.20
  -5 -11  -3   -0.20    1.00
  -5  11  -3   -0.40    0.60
  -5  11  -3    0.10    0.90
   5  11   3   -1.00    0.80
  -6 -11  -3   57.39    3.80
   6  11   3   57.29    3.50
  -6  11  -3   54.09    3.60
  -6  11  -3   52.49    2.90
  -7 -11  -3    2.60    1.50
  -7  11  -3    1.20    1.10
   7  11   3    1.70    1.10
  -7  11  -3    1.20    0.90
  -8 -11  -3    2.30    1.60
  -8  11  -3    4.70    1.50
  -8  11  -3    5.40    1.30
   8  11   3    3.60    1.30
  -9 -11  -3    1.30    1.70
  -9  11  -3    2.30    1.10
  -9 -12   3    4.00    2.00
  -9 -12   3    6.50    2.10
  -8 -12   3   41.20    4.00
  -8 -12   3   39.30    3.90
  -7 -12   3   12.10    2.40
   7  12  -3   16.00    2.20
  -6 -12   3    2.90    1.40
   6  12  -3    2.90    1.20
  -5 -12   3   34.70    2.90
   5  12  -3   38.20    2.80
  -5  12   3   35.30    1.50
  -4 -12   3    3.50    1.40
   4  12  -3    2.20    1.10
  -4  12   3    2.70    0.60
  -3 -12   3   56.49    3.30
   3 -12  -3   52.49    2.90
   3  12  -3   53.49    3.20
  -3  12   3   48.60    2.20
  -3  12   3   51.19    2.30
   2 -12  -3   57.69    3.10
  -2 -12   3   56.19    3.20
   2  12  -3   54.69    3.50
  -2  12   3   56.59    2.60
  -2  12   3   53.59    2.50
   2  12  -3   55.49    3.20
   1 -12  -3  289.37    9.70
  -1 -12   3  298.77    9.60
   1  12  -3  274.77    9.70
  -1  12   3  299.47    9.20
   0 -12  -3  278.27    8.20
   0  12   3  278.97    8.90
   0  12  -3  266.17    9.70
  -1 -12  -3   51.19    2.50
   1 -12   3   48.40    2.40
  -1  12  -3   49.99    2.90
   1  12   3   51.39    2.80
  -1  12  -3   50.29    3.20
   2 -12   3   70.09    2.60
   2 -12   3   70.89    2.70
  -2 -12  -3   66.89    3.30
  -2  12  -3   68.29    3.90
  -2  12  -3   69.19    3.50
  -3 -12  -3   16.70    2.00
   3  12   3   15.30    1.80
  -3  12  -3   22.40    1.90
  -3  12  -3   20.40    2.30
  -4 -12  -3   54.89    3.50
  -4  12  -3   53.79    3.00
   4  12   3   56.69    3.40
  -4  12  -3   56.99    3.60
  -5 -12  -3   38.60    3.10
  -5  12  -3   42.30    2.60
  -5  12  -3   39.60    3.00
   5  12   3   37.40    2.80
  -6 -12  -3   21.50    2.70
  -6  12  -3   26.60    2.80
   6  12   3   25.80    2.70
  -6  12  -3   28.70    2.20
  -7 -12  -3   57.89    4.10
  -7  12  -3   54.79    3.10
   7  12   3   53.69    3.60
  -7  12  -3   53.59    3.70
  -8 -12  -3   -0.50    1.30
  -8  12  -3    0.00    1.00
   8  12   3   -0.30    1.00
  -8  12  -3   -0.20    0.80
  -9 -12  -3   24.20    3.40
  -9  12  -3   21.30    2.40
  -9 -13   3   -0.70    1.50
  -9 -13   3    0.70    1.60
  -8 -13   3   39.90    4.10
  -8 -13   3   50.29    4.20
  -7 -13   3   18.80    2.70
  -7 -13   3   26.60    3.30
   7  13  -3   17.80    2.30
  -6 -13   3   77.59    4.60
  -6  13   3   74.69    2.60
   6  13  -3   79.09    4.30
  -5 -13   3    8.00    1.80
   5  13  -3   11.10    1.90
  -5  13   3   11.30    1.00
  -4 -13   3   29.50    3.00
  -4  13   3   28.50    1.60
   4  13  -3   26.30    2.60
   3 -13  -3    3.30    1.00
  -3 -13   3    5.00    1.40
   3  13  -3    4.00    1.30
  -3  13   3    4.20    0.90
  -2 -13   3   60.39    3.40
  -2  13   3   64.69    3.00
   2  13  -3   68.59    3.70
  -1 -13   3   75.99    3.60
   1  13  -3   68.89    3.80
  -1  13   3   80.59    3.50
  -1 -13  -3   -0.20    0.50
   1 -13   3   -0.60    0.50
   1 -13   3    0.20    0.50
  -1  13  -3   -0.50    0.70
  -1  13  -3   -0.20    0.90
   1  13   3    0.20    0.70
   2 -13   3   49.40    2.10
  -2 -13  -3   47.50    2.80
  -2  13  -3   53.59    3.10
  -2  13  -3   56.29    3.50
  -3 -13  -3    6.30    1.50
  -3  13  -3   11.00    1.60
   3  13   3    9.10    1.60
  -3  13  -3    7.80    1.70
  -4 -13  -3  215.98    8.20
  -4  13  -3  228.98    8.70
   4  13   3  227.98    8.20
  -4  13  -3  208.78    7.70
  -5 -13  -3    4.70    1.50
  -5  13  -3    7.00    1.30
   5  13   3    4.40    1.40
  -5  13  -3    4.60    1.50
  -6 -13  -3   12.90    2.30
  -6  13  -3   17.30    2.40
   6  13   3   19.90    2.50
  -6  13  -3   11.60    1.70
  -7 -13  -3   -0.40    1.30
   7  13   3    1.40    1.20
  -7  13  -3    1.90    1.00
  -7  13  -3    1.20    1.20
  -8 -13  -3   89.39    5.50
   8  13   3   85.99    4.80
  -8  13  -3   91.69    4.40
  -9 -13  -3    7.70    2.40
  -9  13  -3    9.60    1.70
  -9 -14   3   20.50    3.40
  -8 -14   3    1.10    1.60
  -8 -14   3    2.50    1.70
  -7 -14   3   69.09    4.70
  -7 -14   3   73.69    4.80
   7  14  -3   66.29    4.20
  -6 -14   3   -0.50    1.20
  -6 -14   3    1.40    1.50
  -6  14   3    0.90    0.60
   6  14  -3    0.50    1.20
  -5 -14   3   55.29    3.80
   5  14  -3   56.59    3.70
  -5  14   3   59.19    2.50
  -4 -14   3    0.00    1.00
  -4  14   3    0.60    0.60
   4  14  -3    0.10    1.00
  -3 -14   3    3.60    1.20
   3  14  -3    1.80    1.10
  -3  14   3    1.70    0.70
  -2 -14   3    6.10    1.40
   2  14  -3    9.20    1.80
  -2  14   3    5.80    1.10
  -1 -14   3  155.68    5.90
   1  14  -3  158.18    6.80
   1  14  -3  152.38    6.30
  -1  14   3  148.79    5.70
   0 -14  -3   31.80    1.60
   0  14  -3   33.10    2.60
   0  14  -3   35.20    2.90
   0  14   3   38.80    2.50
   1 -14   3  155.18    5.40
  -1 -14  -3  151.48    5.50
   1 -14   3  154.58    5.40
  -1  14  -3  153.18    6.60
  -1  14  -3  158.38    6.30
   1  14   3  151.98    6.00
  -2 -14  -3    3.10    1.00
   2  14   3    3.60    1.20
  -2  14  -3    4.90    1.60
  -2  14  -3    3.10    1.10
  -3 -14  -3   86.49    4.20
  -3  14  -3   79.29    4.10
  -3  14  -3   89.59    4.80
   3  14   3   83.49    4.30
  -4 -14  -3    7.20    1.70
  -4  14  -3    8.60    1.50
   4  14   3   11.80    1.90
  -4  14  -3    8.30    1.80
  -5 -14  -3   56.29    3.90
  -5  14  -3   48.10    3.60
  -5  14  -3   54.39    3.20
   5  14   3   49.20    3.50
  -6 -14  -3    0.70    1.40
  -6  14  -3    0.30    1.20
  -6  14  -3    1.00    1.00
   6  14   3    1.50    1.40
  -7 -14  -3   33.90    3.70
   7  14   3   26.50    3.00
  -7  14  -3   29.60    3.30
  -7  14  -3   32.90    2.60
  -8 -14  -3   13.00    2.60
  -8  14  -3   15.20    2.00
   8  14   3   14.90    2.40
  -9  14  -3   14.30    2.10
  -8 -15   3    7.10    2.20
  -8 -15   3    7.80    2.30
  -7 -15   3    5.40    1.80
  -7 -15   3    5.10    2.00
   7  15  -3    6.10    1.70
  -6 -15   3   85.19    5.20
  -6 -15   3   92.09    5.30
  -6  15   3   91.29    3.50
   6  15  -3   89.69    4.90
  -5 -15   3   21.90    2.80
  -5 -15   3   27.30    3.00
  -5  15   3   27.70    1.80
   5  15  -3   30.00    3.10
  -4 -15   3   91.89    4.80
  -4 -15   3   92.49    4.90
  -4  15   3   87.39    3.70
   4  15  -3   87.89    4.70
  -3 -15   3    5.70    1.50
  -3 -15   3    6.20    1.60
  -3  15   3    5.00    1.10
   3  15  -3    4.20    1.50
  -2 -15   3   79.19    4.10
  -2 -15   3   82.19    4.10
   2  15  -3   81.39    4.40
  -2  15   3   80.29    3.70
  -1 -15   3   -0.90    0.70
  -1 -15   3    0.30    0.80
  -1  15   3    0.20    0.80
   1  15  -3   -0.10    0.90
   1  15  -3    0.30    1.00
   0  15   3   17.40    1.90
   0  15  -3   14.70    2.20
   0  15  -3   15.30    2.10
  -1 -15  -3   14.50    1.50
  -1  15  -3   13.50    2.00
  -1  15  -3   16.30    2.30
   1  15   3   16.20    2.10
  -2 -15  -3   94.99    4.30
  -2  15  -3   95.69    4.70
  -2  15  -3   98.49    5.20
   2  15   3   98.39    4.70
  -3 -15  -3  119.39    5.20
  -3  15  -3  124.09    6.00
   3  15   3  120.19    5.50
  -3  15  -3  110.69    5.10
  -4 -15  -3   71.69    4.10
   4  15   3   71.69    4.20
  -4  15  -3   74.39    4.40
  -4  15  -3   77.69    4.00
  -5 -15  -3   14.40    2.40
   5  15   3    7.00    1.70
  -5  15  -3    8.20    1.80
  -5  15  -3   12.80    1.90
  -6 -15  -3   87.29    5.20
  -6  15  -3   92.29    5.20
  -6  15  -3   90.99    4.50
   6  15   3   91.59    5.10
  -7 -15  -3   -1.20    1.40
   7  15   3   -0.30    1.20
  -7  15  -3    1.00    1.00
  -7  15  -3    2.20    1.40
  -8 -15  -3   46.40    4.60
  -8  15  -3   41.30    3.10
   8  15   3   42.60    3.60
  -8 -16   3    4.30    2.10
  -7 -16   3   48.70    4.10
  -7 -16   3   35.00    4.10
   7  16  -3   53.99    3.90
  -6 -16   3    0.80    1.50
  -6 -16   3    0.50    1.50
  -6  16   3    1.60    0.80
   6  16  -3    2.10    1.40
  -5 -16   3   29.00    3.30
  -5 -16   3   23.20    3.00
   5  16  -3   22.50    2.80
  -5  16   3   25.60    1.90
  -4 -16   3    8.00    1.90
  -4 -16   3   14.00    2.30
   4  16  -3   12.50    2.20
  -4  16   3   12.30    1.50
  -3 -16   3   25.00    2.70
  -3 -16   3   24.10    2.60
  -3  16   3   22.30    2.00
   3  16  -3   29.30    3.00
  -2 -16   3    0.00    0.90
  -2 -16   3   -1.10    0.90
   2  16  -3   -0.60    1.00
  -2  16   3    0.00    0.80
  -1 -16   3  217.08    7.70
  -1 -16   3  216.08    7.70
   1  16  -3  211.18    8.30
  -1  16   3  214.68    7.70
   1  16  -3  210.18    8.80
   0  16  -3   22.30    2.80
   0  16   3   25.40    2.50
   0  16  -3   25.40    2.70
   1  16   3    0.30    1.00
  -1  16  -3    1.20    1.20
  -1  16  -3   -2.50    1.00
  -2 -16  -3   15.50    1.80
   2  16   3   12.00    1.90
  -2  16  -3   11.40    1.90
  -2  16  -3   17.20    2.60
  -3 -16  -3  318.37   11.00
  -3  16  -3  325.27   11.20
   3  16   3  325.07   11.40
  -3  16  -3  342.17   12.10
  -4 -16  -3    0.30    1.10
  -4  16  -3   -0.30    0.90
  -4  16  -3   -0.10    1.10
   4  16   3    0.70    1.20
  -5 -16  -3   32.80    3.30
  -5  16  -3   35.00    2.80
   5  16   3   33.10    3.30
  -5  16  -3   27.30    3.20
  -6 -16  -3   -1.50    1.20
   6  16   3    0.90    1.30
  -6  16  -3   -0.10    1.00
  -6  16  -3   -0.80    1.10
  -7 -16  -3   11.90    2.50
   7  16   3   12.70    2.40
  -7  16  -3   11.20    1.90
  -8 -16  -3    1.60    1.80
   8  16   3    3.10    1.70
  -8  16  -3    0.10    1.00
  -7 -17   3    1.10    1.70
   7  17  -3    0.70    1.30
  -6 -17   3  108.69    5.90
   6  17  -3   94.89    5.50
  -6  17   3   96.39    4.10
  -5 -17   3    7.60    2.00
  -5 -17   3    6.70    2.00
   5  17  -3    9.00    2.00
  -5  17   3    7.90    1.30
  -4 -17   3    7.40    1.80
  -4 -17   3    7.50    1.90
  -4  17   3   10.10    1.50
   4  17  -3   11.50    2.20
  -3 -17   3    1.40    1.30
  -3 -17   3    0.40    1.10
   3  17  -3    2.50    1.40
  -3  17   3    1.00    0.90
  -2 -17   3   75.69    4.20
  -2 -17   3   75.59    4.10
  -2  17   3   75.79    3.80
   2  17  -3   71.19    4.40
  -1 -17   3    7.70    1.60
  -1  17   3    8.40    1.60
   1  17  -3    7.20    1.70
   0  17  -3   -0.10    1.30
   0  17  -3    1.60    1.20
   0  17   3    1.60    1.10
   1  17   3    2.80    1.40
  -1  17  -3    2.70    1.30
  -1  17  -3    5.60    1.80
  -2  17  -3  174.98    7.20
  -2  17  -3  183.18    8.00
   2  17   3  172.48    7.20
  -3 -17  -3   16.60    2.10
  -3  17  -3   12.60    2.40
  -3  17  -3   13.10    2.10
   3  17   3   14.70    2.30
  -4 -17  -3   15.80    2.30
  -4  17  -3   16.80    2.60
  -4  17  -3   16.20    2.30
   4  17   3   14.10    2.30
  -5 -17  -3    1.10    1.30
  -5  17  -3   -0.70    0.90
   5  17   3   -0.50    1.10
  -5  17  -3    0.10    1.20
  -6 -17  -3   32.60    3.60
  -6  17  -3   37.50    3.90
  -6  17  -3   44.10    3.20
   6  17   3   35.00    3.50
  -7 -17  -3    0.80    1.60
  -7  17  -3    0.70    1.00
   7  17   3    2.20    1.60
  -7 -18   3    8.90    2.50
   7  18  -3    7.80    2.00
  -6 -18   3   20.10    3.00
   6  18  -3   19.10    2.80
  -6  18   3   25.30    2.10
  -5 -18   3   22.50    3.20
  -5  18   3   19.70    2.00
   5  18  -3   19.80    2.90
  -4 -18   3   -0.50    1.20
  -4  18   3    1.70    1.00
   4  18  -3   -0.40    1.30
  -3 -18   3   49.40    3.50
   3  18  -3   47.90    3.70
  -3  18   3   46.40    3.00
  -2 -18   3   14.40    2.10
   2  18  -3   10.50    2.20
  -2  18   3   11.50    1.90
   1  18  -3   81.69    4.80
  -1  18   3   85.49    4.40
   0  18   3   -0.10    1.10
   0  18  -3    1.30    1.30
   0  18  -3   -0.70    1.00
   1  18   3   19.10    2.50
  -1  18  -3   17.10    2.70
  -1  18  -3   21.80    2.80
  -2  18  -3   -1.50    1.10
  -2  18  -3   -1.00    1.00
   2  18   3   -1.90    0.90
   3  18   3   70.19    4.30
  -3  18  -3   63.69    4.50
  -3  18  -3   69.59    4.20
  -4  18  -3   23.20    2.70
   4  18   3   26.10    3.20
  -4  18  -3   20.20    3.00
  -5 -18  -3   -0.10    1.30
  -5  18  -3    0.90    1.40
   5  18   3    2.60    1.50
  -5  18  -3    0.60    1.00
  -6 -18  -3    0.70    1.50
  -6  18  -3   -1.00    1.00
  -6  18  -3    0.20    1.30
   6  18   3    0.60    1.40
  -7 -18  -3    3.30    1.80
   7  18   3    8.00    2.10
  -7  18  -3    4.30    1.50
  -6 -19   3   26.50    3.50
   6  19  -3   32.50    3.70
  -6  19   3   30.60    2.70
  -5 -19   3    1.50    1.60
   5  19  -3    0.30    1.40
  -5  19   3   -1.10    0.80
  -4 -19   3   63.59    4.30
   4  19  -3   53.79    4.20
  -4  19   3   53.39    3.30
  -3 -19   3   -0.40    1.20
  -3  19   3   -0.90    0.80
   3  19  -3    0.00    1.20
  -2  19   3   58.09    3.60
   2  19  -3   68.69    4.50
   1  19  -3    4.00    1.70
  -1  19   3    6.90    1.60
   0  19   3   25.40    2.80
   0  19  -3   24.30    3.00
  -1  19  -3   -0.90    1.20
   1  19   3    0.10    1.00
  -1  19  -3   -1.20    1.00
  -2  19  -3    0.90    1.20
  -2  19  -3    0.30    1.20
   2  19   3    0.40    1.20
  -3  19  -3   62.39    4.00
   3  19   3   53.29    4.10
  -3  19  -3   52.89    4.30
  -4  19  -3    7.70    2.20
   4  19   3    5.40    1.80
  -4  19  -3    7.20    1.90
  -5  19  -3    8.90    2.00
   5  19   3    9.30    2.20
  -5  19  -3   11.70    2.40
  -6  19  -3   26.00    3.50
  -6  19  -3   24.80    2.90
   6  19   3   22.70    3.30
  -5 -20   3   10.30    2.40
  -5  20   3   10.50    1.90
   5  20  -3   13.80    2.70
  -4  20   3    2.70    1.30
   4  20  -3    1.20    1.50
  -3  20   3   40.00    3.00
   3  20  -3   35.80    3.80
   2  20  -3    0.00    1.30
  -2  20   3   -0.90    1.00
   1  20  -3   28.80    3.40
  -1  20   3   25.50    2.90
   0  20  -3    9.90    2.20
   0  20   3    8.20    1.90
  -1  20  -3   -0.80    1.30
  -1  20  -3   -1.00    1.20
   1  20   3    0.20    1.10
   2  20   3    8.50    2.00
  -2  20  -3   13.50    2.60
  -2  20  -3    6.60    1.80
  -3  20  -3    4.90    1.80
  -3  20  -3    4.20    1.80
   3  20   3    2.40    1.60
  -4  20  -3   -1.20    1.10
  -4  20  -3   -0.30    1.40
   4  20   3    0.50    1.50
   5  20   3   11.70    2.40
  -5  20  -3    8.30    2.10
  -4  21   3    3.00    1.30
   4  21  -3    4.20    1.90
  -3  21   3    4.00    1.40
   3  21  -3    3.50    1.80
   2  21  -3   12.90    2.60
  -2  21   3   10.00    2.00
   1  21  -3   20.10    2.90
  -1  21   3   20.90    2.60
   0  21  -3    4.40    1.80
   0  21   3    6.60    1.80
   1  21   3   29.70    3.30
  -1  21  -3   31.70    3.60
   2  21   3    3.00    1.70
  -2  21  -3    7.60    2.00
  -3  21  -3    0.70    1.40
   3  21   3    1.60    1.60
  -4  21  -3    5.80    2.00
   4  21   3    1.30    1.50
  -3  22   3    2.60    1.30
   3  22  -3    3.50    1.90
   2  22  -3    6.90    2.10
  -2  22   3   10.20    2.00
  -1  22   3   26.90    3.10
   1  22  -3   25.60    3.40
   0  22   3    5.50    1.80
   0  22  -3    3.90    1.80
  -1  22  -3   22.10    3.20
   1  22   3   16.60    2.80
   2  22   3    6.70    2.00
  -2  22  -3    5.20    1.80
  -3  22  -3    4.50    1.80
   3  22   3    4.60    2.00
 -11   0   4   -1.40    1.00
 -10   0   4    3.20    1.40
  -9   0   4   -0.20    0.90
  -8   0   4  104.09    4.60
  -7   0   4   -0.30    0.70
  -7   0   4    0.10    0.40
  -6   0   4   14.30    1.20
  -6   0   4   16.60    1.60
  -6   0   4   15.50    1.00
  -5   0   4    0.40    0.30
  -5   0   4    0.90    0.60
  -5   0   4   -0.10    0.40
  -4   0   4  266.67    7.90
  -4   0   4  272.87    8.20
  -3   0   4    0.30    0.30
  -3   0   4    0.20    0.40
   3   0  -4    0.20    0.30
  -2   0   4  323.77    9.20
  -2   0   4  317.07    9.20
   2   0  -4  317.57    8.90
  -1   0   4    0.40    0.30
   1   0  -4    0.00    0.30
  -1   0   4    0.40    0.30
   0   0   4  238.68    7.00
   0   0  -4  228.08    7.00
  -1   0  -4    0.70    0.40
   1   0   4   -0.20    0.30
  -3   0  -4    0.00    0.10
   3   0   4    0.00    0.40
  -4   0  -4   37.10    2.10
   4   0   4   35.70    1.90
  -5   0  -4    0.20    0.70
   5   0   4   -0.20    0.50
   6   0   4   42.10    2.20
  -6   0  -4   30.90    2.40
   7   0   4    0.80    0.60
  -7   0  -4    0.90    0.90
  -8   0  -4  239.28    8.80
  -9   0  -4   -0.90    1.00
 -10   0  -4   30.40    3.30
 -11   0  -4    1.90    1.50
 -11  -1   4   -0.10    1.10
 -11   1   4    0.30    1.00
 -10  -1   4    0.60    1.10
 -10   1   4    0.60    1.00
  -9  -1   4   23.90    2.50
  -9   1   4   29.70    2.40
  -8  -1   4    1.40    1.10
  -8   1   4    0.80    0.90
  -7  -1   4   45.70    2.10
  -7  -1   4   41.60    2.70
  -7   1   4   44.60    2.50
  -7   1   4   45.30    1.70
  -6  -1   4    1.00    0.80
  -6  -1   4    2.50    0.60
  -6   1   4    2.60    0.80
  -6   1   4    1.70    0.40
  -6   1   4    2.60    0.60
  -5  -1   4  156.68    5.40
  -5  -1   4  172.28    5.80
  -5  -1   4  167.68    5.20
  -5   1   4  166.38    5.20
  -5   1   4  169.68    5.50
  -4  -1   4   14.70    1.40
  -4  -1   4   14.70    1.00
  -4  -1   4   13.20    1.10
  -4   1   4   15.80    1.10
  -4   1   4   14.60    0.90
   4   1  -4   15.10    0.60
  -3  -1   4 1567.54   42.70
  -3  -1   4 1535.25   42.40
   3   1  -4 1558.44   42.20
   3   1  -4 1542.15   42.10
  -3   1   4 1586.34   42.20
  -3   1   4 1588.04   42.20
  -2  -1   4   30.40    1.60
  -2  -1   4   32.00    1.50
  -2   1   4   31.20    1.40
  -2   1   4   33.80    1.40
   2   1  -4   31.00    1.40
   2   1  -4   31.80    1.40
  -1  -1   4  859.31   24.20
   1  -1  -4  883.01   23.90
  -1  -1   4  895.41   24.30
  -1   1   4  893.11   24.00
   1   1  -4  843.62   24.10
  -1   1   4  899.01   24.10
   0  -1   4   87.69    3.20
   0  -1  -4   92.69    3.10
   0   1  -4   95.59    3.30
   0   1   4   92.09    3.10
   0   1   4   93.79    3.10
   1  -1   4 1908.01   51.49
  -1  -1  -4 1912.91   51.39
   1   1   4 1882.31   51.29
  -1   1  -4 1888.51   51.39
  -3  -1  -4  180.18    6.20
   3  -1   4  192.18    6.10
  -3   1  -4  190.48    6.10
   3   1   4  189.98    6.10
   4  -1   4   10.40    1.20
   4   1   4    7.50    1.00
  -4   1  -4    9.50    1.20
   5  -1   4  723.93   20.60
  -5  -1  -4  722.73   21.10
   5   1   4  721.83   20.70
  -5   1  -4  741.93   21.00
  -6  -1  -4    2.70    1.00
   6  -1   4    2.10    0.70
   6   1   4    2.20    0.80
  -6   1  -4    3.00    1.00
  -7  -1  -4   27.70    2.60
   7   1   4   32.30    2.10
  -7   1  -4   34.80    2.60
  -8  -1  -4    6.60    1.60
  -8   1  -4    6.50    1.50
  -9  -1  -4   25.00    2.80
  -9   1  -4   23.40    2.70
 -10  -1  -4   22.50    2.90
 -10   1  -4   16.20    2.50
 -11  -1  -4   44.70    3.90
 -11   1  -4   46.20    3.80
 -11  -2   4   -0.50    1.30
 -11   2   4    0.30    1.00
 -10  -2   4    7.60    1.80
 -10   2   4    4.70    1.40
  -9  -2   4    3.00    1.30
  -9   2   4    3.90    1.20
  -8  -2   4  133.39    5.60
  -8   2   4  129.29    5.10
  -7  -2   4    6.30    1.30
  -7  -2   4    5.70    1.00
  -7   2   4    6.40    1.10
  -6  -2   4  277.17    9.30
  -6  -2   4  281.07    8.60
  -6   2   4  291.87    8.30
  -6   2   4  275.97    8.60
  -5  -2   4    9.70    1.30
  -5  -2   4   10.90    1.10
   5   2  -4   11.40    0.70
  -5   2   4   11.60    1.00
  -5   2   4   10.40    0.80
  -4  -2   4  277.17    8.80
  -4  -2   4  283.87    8.30
  -4   2   4  266.87    7.80
  -4   2   4  283.47    7.90
   4   2  -4  277.17    8.00
  -3  -2   4    5.60    0.90
   3   2  -4    5.70    0.70
  -3   2   4    4.30    0.40
  -3   2   4    4.90    0.50
   3   2  -4    4.60    0.70
  -2  -2   4  812.02   23.00
  -2   2   4  828.42   22.30
   2   2  -4  809.62   22.60
   2   2  -4  827.82   22.70
  -2   2   4  827.62   22.30
   1  -2  -4   88.59    2.80
   1  -2  -4   94.49    2.80
  -1   2   4   89.19    3.00
  -1   2   4   91.09    2.90
   1   2  -4   94.49    3.30
   0  -2   4    6.20    0.80
   0  -2  -4    6.80    0.70
   0   2  -4    4.50    0.70
   0   2   4    8.50    0.80
   0   2   4    7.90    0.80
  -1  -2  -4  717.13   19.70
   1  -2   4  713.53   19.90
  -1   2  -4  696.13   19.80
  -3  -2  -4   92.39    3.60
   3  -2   4   88.89    3.40
  -3   2  -4   92.29    3.50
   4  -2   4  220.08    6.70
  -4  -2  -4  181.28    6.80
  -4   2  -4  218.28    6.80
  -5  -2  -4    0.70    0.60
   5  -2   4    0.20    0.50
  -5   2  -4   -0.30    0.60
   5   2   4    0.20    0.20
   6  -2   4  290.57    8.40
  -6   2  -4  291.27    9.10
   6   2   4  236.58    8.50
  -7  -2  -4   20.30    2.30
  -7   2  -4   22.90    2.20
   7   2   4   22.20    1.80
  -8  -2  -4   76.19    4.20
  -8   2  -4   71.89    3.90
  -9  -2  -4    6.00    1.70
  -9   2  -4    6.10    1.50
 -10  -2  -4   51.69    3.90
 -10   2  -4   52.69    3.70
 -11  -2  -4    4.60    1.90
 -11   2  -4    4.80    1.70
 -11  -3   4   12.50    2.40
 -11   3   4   15.20    2.10
 -10  -3   4   15.50    2.40
 -10   3   4   17.10    2.10
  -9  -3   4   20.50    2.60
  -9   3   4   22.20    2.10
  -8  -3   4   11.20    2.00
  -8   3   4   10.90    1.50
  -7  -3   4   81.09    3.50
  -7  -3   4   88.09    4.20
  -7   3   4   77.89    3.30
  -6  -3   4    1.60    0.70
  -6  -3   4    2.10    1.00
  -6   3   4    0.90    0.40
   6   3  -4    1.10    0.40
  -6   3   4    1.30    0.50
  -5  -3   4  295.57    9.90
  -5  -3   4  304.37    9.40
  -5   3   4  302.37    8.50
   5   3  -4  313.87    8.90
  -5   3   4  314.37    8.60
  -4  -3   4    0.10    0.60
  -4  -3   4    0.60    0.50
   4   3  -4    0.40    0.40
  -3  -3   4  259.07    7.80
  -3  -3   4  252.77    8.20
   3   3  -4  259.27    7.80
   3   3  -4  246.28    7.60
  -2  -3   4   29.20    1.80
  -2   3   4   29.70    1.10
   2   3  -4   28.60    1.50
   2   3  -4   26.60    1.60
  -2   3   4   27.80    1.10
   1  -3  -4  147.49    4.10
   1  -3  -4  145.39    4.20
  -1   3   4  145.59    4.40
  -1   3   4  143.49    4.40
   1   3  -4  150.08    4.90
   1   3  -4  141.09    4.80
   0  -3  -4    2.00    0.40
   0  -3   4    1.50    0.50
   0   3  -4    1.30    0.50
   0   3   4    2.20    0.50
   0   3   4    1.90    0.40
   2  -3   4  895.71   25.40
  -2   3  -4  928.21   25.40
   3  -3   4   86.39    3.30
  -3  -3  -4   84.69    3.50
   3   3   4   85.09    3.30
  -3   3  -4   81.09    3.30
  -4  -3  -4   16.40    1.70
   4  -3   4   17.90    1.30
   4   3   4   19.10    1.50
  -4   3  -4   18.20    1.50
   5  -3   4   73.39    2.90
  -5   3  -4   70.79    3.20
   5   3   4   69.99    3.20
   6  -3   4   34.80    1.70
   6   3   4   33.80    2.20
  -6   3  -4   32.20    2.30
  -7  -3  -4  183.58    7.10
  -7   3  -4  182.58    6.70
  -8  -3  -4   15.40    2.30
  -8   3  -4   13.70    1.90
  -9  -3  -4    2.10    1.40
  -9   3  -4    2.10    1.20
 -10  -3  -4   35.00    3.60
 -10   3  -4   34.20    3.30
 -11  -3  -4   16.50    2.80
 -11   3  -4   17.50    2.60
 -11  -4   4    7.20    2.10
 -11   4   4    7.40    1.60
 -10  -4   4   34.10    3.40
 -10   4   4   29.30    2.40
  -9  -4   4   14.50    2.20
  -9   4   4   16.30    1.80
  -8  -4   4  242.98    9.10
  -8   4   4  249.58    7.90
  -7  -4   4    4.00    1.20
  -7  -4   4    4.30    1.00
  -7   4   4    5.20    0.80
  -6  -4   4  153.48    5.60
  -6  -4   4  157.58    6.20
   6   4  -4  156.58    5.00
  -6   4   4  152.78    4.60
  -6   4   4  162.58    4.70
  -5  -4   4    4.50    1.20
  -5  -4   4    7.90    1.10
   5   4  -4    6.10    0.80
  -4  -4   4   63.89    3.20
  -4  -4   4   69.89    3.00
   4   4  -4   67.99    2.70
  -3  -4   4  448.86   13.10
  -3  -4   4  446.76   12.80
   3   4  -4  396.46   12.60
   3   4  -4  437.76   12.60
   2   4  -4   44.70    2.20
  -2   4   4   46.50    1.50
  -2   4   4   46.30    1.60
   2   4  -4   46.60    2.20
  -1   4   4   22.90    1.10
   1   4  -4   19.30    1.40
  -1   4   4   23.80    1.10
   1   4  -4   19.90    1.40
   0  -4  -4 1692.73   46.30
   0  -4   4 1728.83   46.90
   0   4   4 1711.73   46.40
   0   4   4 1724.33   46.40
   2  -4   4 1645.54   44.40
   2   4   4 1599.34   44.20
  -2   4  -4 1621.24   44.30
   3  -4   4   34.40    1.80
  -3  -4  -4   24.70    1.80
   3   4   4   30.60    1.80
  -3   4  -4   32.00    1.80
   4  -4   4  509.75   14.60
  -4  -4  -4  509.35   15.20
   4   4   4  513.95   14.90
  -4   4  -4  500.35   14.80
   5  -4   4   32.30    1.60
  -5  -4  -4   32.40    2.40
   5   4   4   30.40    2.00
  -5   4  -4   37.80    2.20
   6   4   4  620.74   18.20
  -6   4  -4  624.84   18.30
  -7  -4  -4   26.10    2.70
  -7   4  -4   33.10    2.40
   7   4   4   35.10    2.30
  -8  -4  -4   21.10    2.60
  -8   4  -4   26.20    2.50
  -9  -4  -4   38.70    3.40
  -9   4  -4   37.60    2.90
 -10  -4  -4   34.00    3.60
 -10   4  -4   29.80    3.10
 -11  -4  -4   -1.20    1.30
 -11   4  -4   -0.20    1.20
 -11  -5   4   30.80    3.60
 -11  -5   4   29.90    3.60
 -11   5   4   35.10    2.70
 -11   5   4   33.10    2.60
 -10  -5   4   10.10    2.20
 -10   5   4    8.70    1.40
  -9  -5   4   35.80    3.10
  -9   5   4   33.40    2.20
  -8  -5   4   12.50    2.10
  -8   5   4   13.30    1.40
  -7  -5   4   42.90    3.10
  -7  -5   4   50.59    2.80
  -7   5   4   45.90    1.90
  -6  -5   4  114.99    5.00
  -6  -5   4  113.19    4.60
   6   5  -4  113.99    4.10
  -5  -5   4  166.98    6.40
  -5  -5   4  168.78    6.00
   5   5  -4  167.18    5.60
  -4  -5   4  152.08    5.90
  -4  -5   4  159.58    5.60
   4   5  -4  157.28    5.30
   3  -5  -4  236.48    6.70
  -3  -5   4  250.57    7.70
   3   5  -4  234.08    7.70
   3   5  -4  229.78    7.50
  -2  -5   4  836.42   23.20
  -2  -5   4  805.42   23.30
  -2   5   4  804.02   22.10
  -2   5   4  822.12   22.10
  -1  -5   4  110.09    4.20
   0  -5   4  209.38    6.90
   0  -5  -4  204.48    6.20
   0   5   4  210.88    6.40
   0   5   4  216.18    6.40
   1  -5   4 2272.87   61.39
  -1  -5  -4 2245.88   61.09
   2  -5   4    1.20    0.60
   2   5   4    1.80    0.70
  -2   5  -4    3.00    0.80
   3  -5   4  518.65   15.30
  -3  -5  -4  544.95   15.80
   3   5   4  549.85   15.60
  -3   5  -4  534.15   15.50
  -4  -5  -4  302.87    9.70
   4  -5   4  293.67    8.80
   4   5   4  291.47    9.30
  -4   5  -4  294.87    9.20
  -5  -5  -4   79.59    3.90
   5  -5   4   76.79    2.70
   5   5   4   79.79    3.50
  -5   5  -4   80.29    3.40
  -6  -5  -4   39.70    2.90
   6   5   4   37.20    2.40
  -6   5  -4   38.30    2.40
  -7  -5  -4  142.69    6.10
  -7   5  -4  130.09    5.40
   7   5   4  147.19    5.50
  -8  -5  -4   34.10    3.30
  -8   5  -4   28.20    2.40
  -9  -5  -4   44.90    3.70
  -9   5  -4   51.69    3.30
 -10  -5  -4   13.80    2.50
 -10   5  -4   17.40    2.40
 -10  -6   4   10.70    2.20
 -10   6   4   13.20    1.60
  -9  -6   4   11.60    2.20
  -9   6   4   13.00    1.40
  -8  -6   4  246.48    9.30
  -8   6   4  238.68    7.40
  -7  -6   4    0.80    1.10
  -6  -6   4   34.30    2.40
  -6  -6   4   39.00    2.90
   6   6  -4   40.30    2.20
  -5  -6   4   34.50    2.30
   5   6  -4   36.10    2.00
   3  -6  -4    3.50    0.50
  -3  -6   4    3.40    0.90
  -3  -6   4    4.80    1.10
   3   6  -4    2.90    0.70
   3   6  -4    3.20    0.90
  -2  -6   4   24.30    1.90
   2  -6  -4   25.30    1.30
  -2  -6   4   27.90    1.90
  -2   6   4   23.30    1.00
   2   6  -4   24.60    1.80
  -2   6   4   26.10    1.10
   2   6  -4   24.90    1.70
  -1  -6   4   47.40    2.60
  -1   6   4   44.60    1.90
   1   6  -4   46.70    2.40
   1   6  -4   50.89    2.60
  -1   6   4   50.99    1.90
   0  -6   4    0.90    0.60
   0  -6  -4    1.30    0.40
   0   6  -4    2.90    0.80
   0   6  -4    0.80    0.60
   0   6   4    0.90    0.50
   0   6   4    1.60    0.50
  -1  -6  -4   40.70    2.00
   1  -6   4   42.70    2.20
   1   6   4   40.60    2.00
   2  -6   4  812.72   23.20
  -2   6  -4  831.72   23.30
   2   6   4  830.22   23.20
   3  -6   4  165.38    5.50
  -3  -6  -4  170.38    6.00
  -3   6  -4  167.78    5.70
   3   6   4  168.88    5.80
  -4  -6  -4  235.38    8.10
   4  -6   4  232.58    7.10
  -4   6  -4  239.28    7.60
   4   6   4  237.58    7.80
  -5  -6  -4    6.70    1.50
   5   6   4    5.20    1.10
  -5   6  -4    7.30    1.10
  -6  -6  -4  244.28    8.90
   6   6   4  245.48    8.30
  -6   6  -4  247.58    8.10
  -7  -6  -4    8.70    1.80
  -7   6  -4    9.10    1.50
   7   6   4    7.70    1.40
  -8  -6  -4    9.90    2.00
  -8   6  -4   13.40    1.80
  -9  -6  -4    8.40    2.00
  -9   6  -4    7.70    1.60
 -10  -6  -4   14.20    2.60
 -10   6  -4   19.10    2.40
 -10  -7   4    1.50    1.50
  -9  -7   4    2.80    1.50
  -8  -7   4   50.19    3.70
  -8   7   4   51.59    2.10
  -7  -7   4   25.70    2.80
  -5  -7   4   74.49    3.70
   5   7  -4   74.89    3.30
  -4  -7   4  114.39    4.70
  -4  -7   4  113.69    4.90
   4   7  -4  111.79    4.40
   3  -7  -4  755.82   20.80
  -3  -7   4  762.52   22.10
  -3  -7   4  754.12   21.80
   3   7  -4  755.22   21.80
   3   7  -4  735.63   21.50
   2  -7  -4  149.59    4.90
  -2  -7   4  150.58    5.70
  -2  -7   4  151.78    5.60
  -2   7   4  154.38    4.50
  -2   7   4  153.98    4.50
   2   7  -4  143.99    5.50
   2   7  -4  147.49    5.40
  -1  -7   4    1.00    0.70
  -1   7   4    1.00    0.40
   1   7  -4    2.70    0.80
  -1   7   4    1.40    0.50
   1   7  -4    2.00    0.90
   0  -7  -4   14.10    1.00
   0   7  -4   11.90    1.30
   0   7   4   14.00    1.20
   0   7  -4   11.20    1.40
   1  -7   4  845.62   23.20
  -1  -7  -4  818.92   22.80
   1   7   4  816.32   23.00
  -1   7  -4  789.42   23.20
  -1   7  -4  822.12   23.60
  -2  -7  -4   89.99    3.90
   2  -7   4  108.29    3.90
   2   7   4  106.89    4.00
  -2   7  -4  118.99    4.20
  -3  -7  -4  103.79    4.10
   3  -7   4   91.89    3.50
  -3   7  -4   95.79    3.80
   3   7   4   92.99    3.90
   4  -7   4   44.20    1.80
  -4  -7  -4   43.80    2.70
  -4   7  -4   41.60    2.30
   4   7   4   40.80    2.40
  -5  -7  -4   15.50    2.00
  -5   7  -4   12.00    1.40
   5   7   4   18.20    2.00
  -6  -7  -4   58.29    3.60
   6   7   4   58.39    3.20
  -6   7  -4   58.09    3.00
  -7  -7  -4   38.40    3.20
   7   7   4   34.10    2.60
  -7   7  -4   40.70    2.60
  -8  -7  -4   67.99    4.30
   8   7   4   63.89    3.60
  -8   7  -4   64.29    3.50
  -9  -7  -4   89.09    5.10
  -9   7  -4   77.99    4.10
 -10  -7  -4    6.50    2.00
 -10   7  -4    2.50    1.30
 -10  -8   4   37.10    3.80
  -9  -8   4    4.30    1.70
  -8  -8   4   48.00    3.70
  -7  -8   4    1.30    1.30
   7   8  -4    0.00    0.60
  -6  -8   4   16.00    2.20
   6   8  -4   18.90    1.90
  -5  -8   4    1.80    1.00
   5   8  -4    0.20    0.70
  -4  -8   4  116.49    4.90
  -4  -8   4  114.89    5.10
   4   8  -4  118.89    4.70
   3  -8  -4  228.18    7.20
  -3  -8   4  224.98    8.20
  -3  -8   4  235.68    8.10
   3   8  -4  240.88    7.90
   3   8  -4  243.78    8.20
  -2  -8   4 1144.39   31.70
  -2  -8   4 1122.59   31.70
   2  -8  -4 1112.99   30.90
  -2   8   4 1120.69   30.30
   2   8  -4 1098.09   31.40
  -2   8   4 1119.49   30.30
   2   8  -4 1099.99   31.70
  -1  -8   4  425.76   13.20
  -1   8   4  432.16   12.40
   1   8  -4  438.76   13.50
   1   8  -4  434.16   13.20
  -1   8   4  433.96   12.40
   0  -8  -4  438.36   12.70
   0   8  -4  457.05   13.60
   0   8   4  453.25   13.00
   1  -8   4  158.88    5.50
  -1  -8  -4  158.58    5.20
  -1   8  -4  153.08    5.90
   1   8   4  148.39    5.30
  -1   8  -4  146.39    5.50
   2  -8   4  231.38    7.40
  -2  -8  -4  239.18    7.60
  -2   8  -4  235.18    7.70
   2   8   4  234.88    7.60
  -2   8  -4  233.38    8.20
   3  -8   4   54.49    2.30
  -3  -8  -4   63.29    3.10
   3   8   4   52.99    2.80
  -3   8  -4   57.59    2.80
  -4  -8  -4    1.80    1.00
   4  -8   4    2.00    0.40
   4   8   4    1.70    0.90
  -4   8  -4    2.50    0.80
  -5  -8  -4   64.59    3.60
   5   8   4   54.99    3.10
  -5   8  -4   61.69    3.00
  -6  -8  -4  238.68    8.90
   6   8   4  233.38    8.30
  -6   8  -4  242.18    8.00
  -7  -8  -4   51.59    3.70
   7   8   4   53.59    3.20
  -7   8  -4   50.09    2.90
  -8  -8  -4    6.60    2.00
   8   8   4    4.90    1.30
  -8   8  -4    3.80    1.20
  -9  -8  -4    4.90    2.00
  -9   8  -4    1.80    1.10
 -10  -8  -4   46.90    4.60
 -10   8  -4   43.30    3.20
 -10  -9   4    2.80    1.70
 -10  -9   4    3.90    1.90
  -9  -9   4    3.30    1.70
  -8  -9   4    1.20    1.30
  -7  -9   4    5.90    1.70
   7   9  -4    4.50    1.20
  -6  -9   4    4.70    1.50
   6   9  -4    3.20    1.10
  -5  -9   4    2.10    1.10
   5   9  -4    2.00    0.90
  -4  -9   4   34.30    2.60
   4   9  -4   32.20    2.30
   3  -9  -4  402.96   12.10
  -3  -9   4  383.56   13.00
  -3   9   4  414.06   11.30
   3   9  -4  418.26   12.80
   3   9  -4  417.06   13.10
  -3   9   4  424.16   11.40
  -2  -9   4  166.48    6.40
  -2  -9   4  171.98    6.40
   2  -9  -4  163.28    5.70
   2   9  -4  179.08    6.60
  -2   9   4  172.38    5.30
   2   9  -4  164.18    6.20
  -2   9   4  168.08    5.20
  -1  -9   4 1949.10   54.39
   1  -9  -4 1986.60   53.99
  -1   9   4 1968.50   53.49
   1   9  -4 2012.30   54.69
   1   9  -4 1968.20   54.29
  -1   9   4 1950.01   53.59
   0  -9   4   17.10    1.70
  -1  -9  -4  815.32   22.70
   1  -9   4  821.02   23.00
  -1   9  -4  795.92   23.20
  -1   9  -4  802.22   23.70
   1   9   4  808.52   22.90
   2  -9   4   59.59    2.70
  -2  -9  -4   57.49    2.80
  -2   9  -4   69.19    3.50
   2   9   4   61.49    3.00
  -2   9  -4   60.39    3.00
  -3  -9  -4   10.60    1.50
   3  -9   4   11.40    1.00
  -3   9  -4   10.20    1.40
  -3   9  -4   13.60    1.90
   3   9   4   10.50    1.50
  -4  -9  -4    5.70    1.30
  -4   9  -4    5.00    1.10
   4   9   4    3.80    1.00
  -5  -9  -4   14.10    2.00
   5   9   4   13.70    1.80
  -5   9  -4   16.40    1.80
  -6  -9  -4   28.40    2.90
  -6   9  -4   24.80    2.10
   6   9   4   26.70    2.60
  -7  -9  -4   23.60    2.80
   7   9   4   28.40    2.70
  -7   9  -4   25.60    2.40
  -8  -9  -4    1.00    1.50
   8   9   4    1.90    1.20
  -8   9  -4    0.70    0.90
  -9  -9  -4  115.19    6.20
  -9   9  -4  103.99    4.90
 -10  -9  -4    2.10    1.80
 -10   9  -4    0.00    1.00
 -10 -10   4    7.80    2.40
 -10 -10   4    5.90    2.10
  -9 -10   4    0.40    1.40
  -8 -10   4   45.50    3.70
  -7 -10   4   31.30    3.40
   7  10  -4   30.60    2.40
  -6 -10   4    5.60    1.60
   6  10  -4    7.20    1.40
  -5 -10   4   93.29    4.90
   5  10  -4  101.29    4.50
  -4 -10   4   38.80    2.80
   4  10  -4   32.30    2.40
  -3 -10   4    6.70    1.40
   3 -10  -4    5.40    1.00
  -3  10   4    7.20    0.70
   3  10  -4    7.00    1.40
  -3  10   4    5.90    0.70
   3  10  -4    3.90    1.20
   2 -10  -4  267.47    8.80
  -2 -10   4  287.97    9.40
   2  10  -4  273.67    9.20
   2  10  -4  268.77    9.50
  -2  10   4  278.47    8.30
  -2  10   4  275.37    8.20
  -1 -10   4   72.89    3.70
   1 -10  -4   80.89    3.60
  -1  10   4   81.79    3.20
   1  10  -4   80.29    3.80
   1  10  -4   77.99    4.00
   0 -10  -4  583.14   16.00
   0 -10   4  575.94   17.00
   0 -10  -4  600.94   17.20
   0  10   4  611.44   16.70
   0  10  -4  494.25   16.90
   1 -10   4   28.60    1.90
  -1 -10  -4   26.00    1.70
  -1  10  -4   26.60    2.00
  -1  10  -4   29.20    2.30
   1  10   4   23.00    1.80
   2 -10   4  138.39    4.90
  -2 -10  -4  143.89    5.30
  -2  10  -4  137.29    5.90
  -2  10  -4  156.28    5.60
  -3 -10  -4   90.09    4.10
   3 -10   4   94.69    3.30
  -3  10  -4   93.69    4.50
  -3  10  -4   93.29    4.10
   3  10   4   94.89    4.10
  -4 -10  -4    1.40    1.00
  -4  10  -4    1.80    1.10
  -4  10  -4    0.70    0.80
   4  10   4   -0.20    0.80
  -5 -10  -4    1.10    1.10
   5  10   4   -0.10    0.80
  -5  10  -4   -0.20    0.70
  -6 -10  -4   41.50    3.30
   6  10   4   39.70    2.90
  -6  10  -4   43.40    2.70
  -7 -10  -4    0.80    1.30
  -7  10  -4   -0.30    0.80
   7  10   4   -0.30    0.90
  -8 -10  -4   44.90    3.90
   8  10   4   51.79    3.50
  -8  10  -4   46.50    3.00
  -9 -10  -4    0.50    1.40
  -9  10  -4    0.40    1.00
 -10 -10  -4   30.70    3.80
 -10  10  -4   25.10    2.80
  -9 -11   4   20.30    3.00
  -8 -11   4    4.80    1.80
  -7 -11   4    2.00    1.60
   7  11  -4    1.70    1.10
  -6 -11   4   -0.80    1.00
   6  11  -4    1.40    1.00
  -5 -11   4  251.97    9.30
   5  11  -4  241.08    8.70
  -4 -11   4   26.40    2.70
  -4  11   4   30.40    1.30
  -4  11   4   28.10    1.20
   4  11  -4   28.80    2.40
   3 -11  -4  201.38    7.00
  -3 -11   4  208.98    7.80
  -3  11   4  207.28    6.40
  -3  11   4  210.38    6.40
   3  11  -4  210.28    7.60
   3  11  -4  209.58    7.90
   2 -11  -4   12.70    1.50
  -2 -11   4   10.80    1.70
   2  11  -4   16.50    2.10
  -2  11   4   14.10    1.20
  -2  11   4   12.20    1.20
   2  11  -4   14.60    2.00
  -1 -11   4   18.80    2.00
   1 -11  -4   17.80    1.80
   1  11  -4   15.70    1.90
  -1  11   4   18.10    1.50
   1  11  -4   16.20    2.10
   0 -11   4   23.30    1.90
   0 -11  -4   20.90    1.90
   0 -11  -4   22.20    1.30
   0  11   4   22.50    1.70
  -1 -11  -4  114.99    4.20
   1 -11   4  113.69    4.40
  -1  11  -4  114.79    4.80
  -1  11  -4  112.99    5.20
   1  11   4  110.89    4.50
  -2 -11  -4    5.10    1.00
   2 -11   4    2.90    0.80
  -2  11  -4    2.10    0.90
  -2  11  -4    3.70    1.20
   3 -11   4  139.49    4.40
  -3 -11  -4  140.09    5.50
  -3  11  -4  136.59    5.90
  -3  11  -4  137.79    5.40
   3  11   4  132.69    5.40
  -4 -11  -4   28.90    2.50
  -4  11  -4   28.10    2.90
  -4  11  -4   31.40    2.30
   4  11   4   33.80    2.50
  -5 -11  -4  110.19    5.40
  -5  11  -4  128.69    5.80
  -5  11  -4  120.69    5.00
   5  11   4  125.39    5.30
  -6 -11  -4    1.70    1.40
  -6  11  -4    2.10    1.20
   6  11   4    2.10    1.20
  -6  11  -4    1.70    1.00
  -7 -11  -4    8.20    2.00
  -7  11  -4    4.90    1.60
  -7  11  -4    6.40    1.40
   7  11   4    5.70    1.50
  -8 -11  -4   10.90    2.40
  -8  11  -4   13.30    1.90
   8  11   4   13.70    2.10
  -9 -11  -4   39.50    4.20
  -9  11  -4   35.30    2.90
  -9 -12   4    4.90    2.00
  -9 -12   4    2.30    1.80
  -8 -12   4   38.30    3.90
  -7 -12   4   -1.20    1.00
   7  12  -4    0.00    1.00
  -6 -12   4   78.29    4.70
   6  12  -4   75.79    4.10
  -5 -12   4   15.70    2.40
   5  12  -4   12.90    1.90
  -4 -12   4   54.09    3.60
  -4  12   4   51.99    2.10
   4  12  -4   45.40    3.10
   3 -12  -4  184.48    6.60
  -3 -12   4  189.48    7.30
   3  12  -4  197.08    7.20
  -3  12   4  175.48    5.90
   2 -12  -4   87.39    3.90
  -2 -12   4   79.29    4.10
  -2  12   4   82.59    3.40
   2  12  -4   92.39    4.60
   2  12  -4   82.69    4.20
  -2  12   4   81.89    3.30
  -1 -12   4  142.49    5.80
   1 -12  -4  156.68    6.20
  -1  12   4  148.99    5.30
   1  12  -4  145.69    5.90
   0 -12  -4   26.30    1.40
   0 -12   4   31.00    2.10
   0  12   4   24.80    1.90
  -1 -12  -4   11.00    1.30
   1 -12   4   13.20    1.50
  -1  12  -4   12.30    2.00
   1  12   4   10.00    1.40
  -1  12  -4   12.50    1.80
   2 -12   4  112.09    4.00
  -2 -12  -4  117.19    4.50
  -2  12  -4  100.79    4.70
  -2  12  -4  110.79    5.30
  -3 -12  -4   19.70    2.10
   3  12   4   16.50    2.00
  -3  12  -4   22.50    2.30
  -3  12  -4   18.50    2.30
  -4 -12  -4  159.28    6.40
  -4  12  -4  150.28    6.10
  -4  12  -4  162.58    6.80
   4  12   4  159.18    6.30
  -5 -12  -4   18.40    2.40
   5  12   4   13.20    2.00
  -5  12  -4   12.80    2.10
  -5  12  -4   18.90    2.10
  -6 -12  -4  109.49    5.60
  -6  12  -4  114.29    4.90
  -6  12  -4  111.69    5.70
   6  12   4  108.99    5.20
  -7 -12  -4    2.50    1.70
   7  12   4    2.80    1.40
  -7  12  -4    5.40    1.40
  -7  12  -4    1.10    1.20
  -8 -12  -4   23.20    3.20
  -8  12  -4   24.00    3.10
  -8  12  -4   25.60    2.60
   8  12   4   28.20    3.00
  -9 -12  -4    3.00    1.80
  -9  12  -4    1.70    1.10
  -9 -13   4    7.70    2.30
  -9 -13   4   13.20    2.90
  -8 -13   4    2.40    1.60
  -7 -13   4   35.30    3.70
   7  13  -4   38.20    3.00
  -6 -13   4    2.00    1.50
   6  13  -4    0.90    1.10
  -5 -13   4   17.00    2.50
  -5  13   4   15.40    1.10
   5  13  -4   12.30    2.00
  -4 -13   4    3.00    1.30
   4  13  -4    0.80    1.00
  -4  13   4    3.00    0.70
   3 -13  -4  110.29    4.70
  -3 -13   4  120.39    5.40
  -3  13   4  114.69    4.20
   3  13  -4  116.79    5.30
  -2 -13   4    0.50    0.90
   2  13  -4   -0.60    0.80
   2  13  -4   -0.90    0.90
  -2  13   4    0.00    0.60
  -1 -13   4  131.99    5.30
   1  13  -4  123.99    5.40
  -1  13   4  118.29    4.70
   0 -13   4   15.30    1.80
   0 -13  -4   18.10    1.10
   0  13  -4   15.10    2.20
   0  13   4   16.90    1.80
  -1 -13  -4   63.39    2.80
   1 -13   4   57.69    2.90
  -1  13  -4   65.89    3.90
  -1  13  -4   61.79    3.50
   1  13   4   63.59    3.30
  -2 -13  -4  112.69    4.70
   2 -13   4  116.59    4.20
  -2  13  -4  124.59    5.70
  -2  13  -4  113.39    5.00
   2  13   4  119.09    5.00
  -3 -13  -4  256.17    8.80
   3  13   4  251.27    9.00
  -3  13  -4  255.67    9.60
  -3  13  -4  248.48    8.90
  -4 -13  -4   -0.90    1.00
   4  13   4   -1.60    0.90
  -4  13  -4    1.50    1.10
  -4  13  -4    0.10    0.90
  -5 -13  -4   -0.80    1.10
  -5  13  -4    1.80    1.00
   5  13   4    1.40    1.20
  -5  13  -4    2.30    1.30
  -6 -13  -4    3.50    1.60
  -6  13  -4    4.20    1.30
   6  13   4    6.40    1.70
  -6  13  -4    3.60    1.50
  -7 -13  -4   43.10    4.10
   7  13   4   40.10    3.30
  -7  13  -4   38.10    3.30
  -7  13  -4   39.60    2.90
  -8 -13  -4    1.70    1.60
   8  13   4    0.80    1.30
  -8  13  -4    2.20    1.20
  -8  13  -4    2.10    1.40
  -9 -13  -4   13.40    2.80
  -9  13  -4    9.10    1.80
  -8 -14   4   29.90    3.60
  -8 -14   4   36.30    4.10
  -7 -14   4   -0.60    1.30
   7  14  -4    2.00    1.30
  -6 -14   4   85.49    5.10
   6  14  -4   92.99    4.80
  -5 -14   4    0.10    1.10
   5  14  -4    2.10    1.30
  -5  14   4    2.00    0.70
  -4 -14   4    1.80    1.20
  -4  14   4   -0.30    0.50
   4  14  -4    0.00    1.00
  -3 -14   4   50.09    3.40
  -3  14   4   48.50    2.50
   3  14  -4   44.20    3.20
  -2 -14   4  108.09    5.00
   2  14  -4  111.89    5.50
  -2  14   4  104.49    4.30
   2  14  -4  109.39    5.20
  -1 -14   4  125.09    5.20
   1  14  -4  123.39    5.50
   1  14  -4  111.89    5.70
  -1  14   4  122.59    4.80
   0 -14   4    1.10    1.00
   0  14  -4    4.20    1.40
   0  14   4    2.20    1.00
   0  14  -4    1.20    1.10
   1 -14   4  158.48    5.70
  -1 -14  -4  161.88    5.60
  -1  14  -4  160.88    7.00
   1  14   4  163.78    6.30
  -1  14  -4  168.78    6.70
  -2 -14  -4  239.78    8.30
  -2  14  -4  251.67    9.60
   2  14   4  249.38    8.80
  -2  14  -4  256.97    9.00
  -3 -14  -4    4.00    1.30
  -3  14  -4    4.20    1.50
  -3  14  -4    3.10    1.30
   3  14   4    5.40    1.40
  -4 -14  -4   47.50    3.30
  -4  14  -4   55.09    3.30
  -4  14  -4   51.59    3.80
   4  14   4   47.20    3.30
  -5 -14  -4    1.20    1.30
   5  14   4    0.60    1.20
  -5  14  -4    1.30    1.30
  -5  14  -4    0.10    0.90
  -6 -14  -4   89.69    5.10
   6  14   4   89.39    4.80
  -6  14  -4   82.39    4.90
  -6  14  -4   87.99    4.50
  -7 -14  -4   29.70    3.40
  -7  14  -4   24.50    3.10
   7  14   4   23.70    2.80
  -7  14  -4   27.70    2.80
  -8 -14  -4    0.00    1.50
   8  14   4    0.50    1.30
  -8  14  -4    2.40    1.10
  -8 -15   4    7.70    2.20
  -8 -15   4    7.20    2.20
  -7 -15   4   51.59    4.30
  -7 -15   4   53.99    4.30
   7  15  -4   54.89    3.80
  -6 -15   4    0.50    1.30
   6  15  -4    1.00    1.20
  -5 -15   4   15.30    2.40
   5  15  -4   17.90    2.50
  -5  15   4   18.00    1.50
  -4 -15   4    1.90    1.30
   4  15  -4    0.40    1.10
  -4  15   4    0.60    0.70
  -3 -15   4   99.19    4.90
   3  15  -4  101.09    5.00
  -3  15   4   90.69    3.90
  -2 -15   4    0.10    1.00
  -2  15   4    0.70    0.80
   2  15  -4    0.00    1.10
   2  15  -4    1.10    1.20
  -1 -15   4    5.00    1.30
  -1  15   4    3.80    1.10
   1  15  -4    5.40    1.60
   1  15  -4    6.60    1.70
   0 -15   4   12.80    1.70
   0  15  -4    9.00    1.80
   0  15   4   10.20    1.60
   0  15  -4   14.50    2.30
   1 -15   4  126.19    5.10
  -1  15  -4  124.69    5.70
   1  15   4  129.79    5.40
  -1  15  -4  124.49    6.10
  -2 -15  -4   19.60    2.00
  -2  15  -4   18.40    2.30
   2  15   4   16.90    2.10
  -2  15  -4   17.60    2.40
  -3 -15  -4   27.30    2.60
  -3  15  -4   25.80    3.10
  -3  15  -4   29.30    2.60
   3  15   4   30.20    2.90
  -4 -15  -4    3.00    1.40
  -4  15  -4    2.40    1.60
  -4  15  -4    1.20    1.10
   4  15   4    2.30    1.40
  -5 -15  -4   40.80    3.40
  -5  15  -4   46.20    3.20
   5  15   4   45.10    3.40
  -5  15  -4   39.30    3.50
  -6 -15  -4    1.40    1.50
  -6  15  -4    0.50    1.30
  -6  15  -4    0.30    1.00
   6  15   4    0.20    1.20
  -7 -15  -4   49.60    4.20
  -7  15  -4   52.29    3.50
   7  15   4   53.89    3.90
  -7  15  -4   51.39    4.00
  -8 -15  -4    3.00    1.90
  -8  15  -4    7.40    1.70
   8  15   4    7.60    2.00
  -8 -16   4   19.70    3.30
  -8 -16   4   19.00    3.20
  -7 -16   4    0.40    1.50
  -7 -16   4    1.70    1.70
   7  16  -4   -0.40    1.20
  -6 -16   4   56.19    4.30
  -6 -16   4   49.99    4.10
   6  16  -4   57.29    3.90
  -5 -16   4    0.60    1.40
  -5 -16   4    1.00    1.40
  -5  16   4   -0.20    0.60
   5  16  -4    0.30    1.20
  -4 -16   4    4.00    1.60
   4  16  -4    2.30    1.40
  -4  16   4    4.40    1.10
  -3 -16   4    2.70    1.40
   3  16  -4    4.90    1.60
  -3  16   4    3.70    1.10
  -2 -16   4  109.59    5.10
   2  16  -4  112.79    5.50
  -2  16   4  100.99    4.50
  -1 -16   4    6.90    1.40
  -1 -16   4   10.60    1.70
  -1  16   4    7.40    1.40
   1  16  -4    8.90    1.90
   1  16  -4    7.10    1.80
   0 -16   4    4.90    1.20
   0 -16   4    3.50    1.20
   0  16  -4    3.90    1.70
   0  16   4    5.40    1.30
   0  16  -4    4.20    1.40
   1  16   4   69.69    3.80
  -1  16  -4   72.59    4.20
  -1  16  -4   61.39    4.20
  -2  16  -4   76.69    4.30
   2  16   4   62.79    3.90
  -2  16  -4   66.99    4.40
  -3 -16  -4   11.60    1.90
   3  16   4   12.20    2.00
  -3  16  -4   11.70    2.30
  -3  16  -4   10.70    1.90
  -4 -16  -4   69.39    4.10
  -4  16  -4   62.49    4.00
  -4  16  -4   74.19    4.70
   4  16   4   74.59    4.40
  -5 -16  -4   -0.40    1.10
  -5  16  -4    0.40    1.20
  -5  16  -4    0.40    1.10
   5  16   4    0.00    1.20
  -6 -16  -4   28.10    3.30
  -6  16  -4   23.70    3.10
   6  16   4   28.80    3.20
  -6  16  -4   24.40    2.80
  -7 -16  -4    4.70    2.00
   7  16   4    7.40    2.10
  -7  16  -4    4.00    1.50
  -7  16  -4    5.30    1.80
  -7 -17   4   53.69    4.60
  -7 -17   4   47.20    4.70
   7  17  -4   50.39    4.00
  -6 -17   4    3.00    1.90
  -6 -17   4    1.20    1.60
   6  17  -4    2.40    1.60
  -5 -17   4   -0.50    1.30
  -5 -17   4   -0.20    1.40
  -5  17   4    0.40    0.70
   5  17  -4    0.30    1.30
  -4 -17   4    0.70    1.30
  -4 -17   4    1.30    1.40
  -4  17   4    1.50    0.90
   4  17  -4    2.50    1.50
  -3 -17   4   84.99    4.70
  -3 -17   4   89.69    4.80
  -3  17   4   79.79    3.90
   3  17  -4   79.89    4.80
  -2 -17   4    2.60    1.30
  -2 -17   4    1.30    1.20
  -2  17   4    0.70    0.90
   2  17  -4    0.40    1.20
  -1 -17   4  148.89    6.10
  -1 -17   4  150.28    6.10
   1  17  -4  151.98    6.80
  -1  17   4  153.38    6.10
   1  17  -4  151.38    7.30
   0  17   4   27.50    2.70
   0  17  -4   23.70    3.20
   0  17  -4   28.10    3.00
  -1  17  -4  122.89    5.80
  -1  17  -4  110.39    6.10
   1  17   4  113.69    5.30
   2  17   4   -0.20    1.00
  -2  17  -4    1.10    1.30
  -2  17  -4    1.40    1.40
  -3  17  -4    8.00    1.80
   3  17   4    7.40    1.80
  -3  17  -4    5.30    1.90
  -4 -17  -4   42.20    3.20
  -4  17  -4   37.70    3.20
  -4  17  -4   35.50    3.80
   4  17   4   43.80    3.50
  -5 -17  -4   15.40    2.50
  -5  17  -4   13.40    2.20
   5  17   4   20.50    2.80
  -5  17  -4   14.60    2.60
  -6 -17  -4   13.60    2.40
   6  17   4   12.40    2.40
  -6  17  -4   17.10    2.40
  -6  17  -4    9.90    2.30
  -7 -17  -4    8.20    2.30
   7  17   4    9.10    2.10
  -7  17  -4   11.50    2.00
  -6 -18   4   19.20    3.00
  -6 -18   4   18.00    3.00
   6  18  -4   14.70    2.60
  -5 -18   4   -0.20    1.30
  -5 -18   4   -0.30    1.40
  -5  18   4   -0.80    0.80
   5  18  -4    0.00    1.40
  -4 -18   4   46.00    3.70
  -4 -18   4   43.50    3.60
   4  18  -4   49.40    3.90
  -4  18   4   44.00    2.80
  -3 -18   4    9.20    2.00
  -3 -18   4   14.10    2.30
  -3  18   4   12.60    1.80
   3  18  -4   12.40    2.30
  -2 -18   4    5.60    1.60
  -2 -18   4    7.90    1.70
  -2  18   4    5.20    1.40
   2  18  -4    2.40    1.50
   1  18  -4   17.30    2.80
  -1  18   4   17.90    2.30
   1  18  -4   17.90    2.60
   0  18   4   45.20    3.30
   0  18  -4   42.50    4.30
   0  18  -4   50.09    3.70
  -1  18  -4   11.90    2.50
  -1  18  -4   13.40    2.30
   1  18   4   11.80    2.00
   2  18   4   54.59    3.70
  -2  18  -4   53.59    4.20
  -2  18  -4   49.10    3.70
  -3  18  -4   12.70    2.20
   3  18   4   13.10    2.30
  -3  18  -4   14.30    2.70
  -4  18  -4    5.50    1.90
  -4  18  -4    4.30    1.60
   4  18   4    5.80    1.80
  -5  18  -4    3.70    1.60
  -5  18  -4    2.60    1.70
   5  18   4    0.00    1.40
  -6 -18  -4   20.60    3.00
  -6  18  -4   15.10    2.50
  -6  18  -4   17.30    2.90
   6  18   4   19.30    2.90
  -6 -19   4    2.80    2.00
   6  19  -4    0.30    1.40
  -5 -19   4   14.70    2.70
  -5 -19   4   19.10    3.00
  -5  19   4   15.90    1.90
   5  19  -4   19.10    3.00
  -4 -19   4    0.10    1.30
  -4 -19   4    0.30    1.30
  -4  19   4   -0.20    0.90
   4  19  -4   -0.30    1.40
  -3 -19   4   47.40    3.60
  -3 -19   4   40.30    3.40
   3  19  -4   40.90    4.10
  -3  19   4   36.90    2.80
   2  19  -4    0.50    1.30
  -2  19   4    1.00    1.00
  -1  19   4   31.70    3.00
   1  19  -4   37.20    3.70
   0  19  -4    0.30    1.40
   0  19  -4   -0.40    1.30
   0  19   4   -0.20    1.10
  -1  19  -4    1.20    1.30
  -1  19  -4    1.40    1.30
   1  19   4    0.00    1.10
   2  19   4   15.80    2.50
  -2  19  -4   11.10    2.20
  -2  19  -4   17.10    2.80
   3  19   4    8.80    2.10
  -3  19  -4   10.20    2.40
  -3  19  -4   11.40    2.20
  -4  19  -4    6.50    1.90
  -4  19  -4    3.30    1.80
   4  19   4    6.80    2.00
   5  19   4   44.40    3.90
  -5  19  -4   44.50    3.60
  -5  19  -4   43.60    4.50
  -6  19  -4    7.00    1.90
   6  19   4   10.90    2.50
  -5 -20   4    0.10    1.60
   5  20  -4    0.90    1.60
  -5  20   4    0.70    1.00
   4  20  -4   56.39    4.50
  -4  20   4   57.09    3.50
  -3  20   4   12.60    2.00
   3  20  -4   12.90    2.60
   2  20  -4    1.80    1.60
  -2  20   4    1.40    1.20
   1  20  -4    4.10    1.70
  -1  20   4    3.30    1.40
   0  20   4    6.50    1.70
   0  20  -4    6.70    2.30
   0  20  -4    7.20    2.00
  -1  20  -4   20.10    2.90
  -1  20  -4   12.40    2.50
   1  20   4   21.70    2.80
  -2  20  -4   23.60    3.00
   2  20   4   25.80    3.10
  -2  20  -4   27.00    3.60
   3  20   4    7.80    2.10
  -3  20  -4   14.10    2.50
   4  20   4   39.70    4.00
  -4  20  -4   32.00    3.60
  -5  20  -4    5.10    1.80
   5  20   4    9.60    2.40
   4  21  -4    1.10    1.70
  -4  21   4    0.10    1.10
   3  21  -4   19.30    3.00
  -3  21   4   17.90    2.40
   2  21  -4   -0.90    1.40
  -2  21   4    1.20    1.20
   1  21  -4   13.00    2.60
  -1  21   4   12.20    2.20
   0  21  -4    0.10    1.30
   0  21   4    0.00    1.30
  -1  21  -4   12.60    2.40
   1  21   4   19.00    2.80
   2  21   4    2.90    1.60
  -2  21  -4    2.70    1.70
   3  21   4   20.80    3.00
  -3  21  -4   20.20    3.00
   4  21   4   14.00    2.70
  -4  21  -4   17.60    2.80
   2  22  -4    6.70    2.20
  -2  22   4    6.20    1.80
   1  22  -4   17.10    2.90
  -1  22   4   23.50    3.00
   0  22  -4   39.50    4.10
   0  22   4   48.40    3.90
   1  22   4    1.60    1.50
  -1  22  -4    0.10    1.60
   2  22   4    3.40    1.80
  -2  22  -4    5.40    2.00
 -11   0   5   12.30    2.10
 -10   0   5   -0.30    1.00
  -9   0   5    7.50    1.60
  -8   0   5   -0.10    0.90
  -7   0   5  113.99    4.70
  -6   0   5   -0.20    0.70
  -6   0   5    0.10    0.50
  -5   0   5  409.76   12.20
  -5   0   5  433.76   12.70
  -4   0   5    1.00    0.50
  -4   0   5    0.60    0.60
   3   0  -5 1869.51   50.29
  -3   0   5 1827.52   50.59
   3   0  -5 1867.21   49.90
  -3   0   5 1900.51   50.79
  -2   0   5    0.00    0.30
   2   0  -5   -0.10    0.30
  -2   0   5   -0.30    0.40
  -1   0   5  282.57    8.30
   1   0  -5  272.07    8.20
   0   0  -5    0.80    0.40
   0   0   5    0.10    0.10
  -2   0  -5    0.30    0.50
   2   0   5    0.00    0.20
  -4   0  -5    0.00    0.20
   4   0   5   -0.10    0.20
   5   0   5  109.89    4.30
  -6   0  -5    0.20    0.80
   6   0   5    1.40    0.70
  -7   0  -5  686.23   20.80
   7   0   5  702.53   20.20
  -8   0  -5   -0.20    1.00
  -9   0  -5   87.19    4.80
 -10   0  -5    0.20    1.20
 -11   0  -5   28.90    3.40
 -11  -1   5   -0.80    1.20
 -11   1   5   -2.00    0.90
 -10  -1   5   23.70    2.80
 -10   1   5   19.50    2.40
  -9  -1   5    2.10    1.20
  -9   1   5    0.80    1.00
  -8  -1   5  134.49    5.70
  -8   1   5  129.29    5.30
  -7  -1   5    0.40    0.90
  -7  -1   5   -0.10    0.40
  -7   1   5    1.20    0.80
  -6  -1   5  149.29    5.70
  -6   1   5  155.98    5.40
  -6   1   5  146.39    5.00
  -5  -1   5    5.70    1.10
  -5   1   5    6.10    0.80
  -5   1   5    6.80    1.00
  -4  -1   5  616.14   17.50
  -4  -1   5  588.14   17.50
  -4   1   5  610.04   17.10
   4   1  -5  609.34   16.40
   3  -1  -5    0.60    0.30
  -3  -1   5   -0.30    0.40
  -3  -1   5    0.50    0.60
  -3   1   5    0.10    0.40
   3   1  -5    0.00    0.30
   3   1  -5    0.60    0.40
  -3   1   5    0.90    0.50
  -2  -1   5  155.38    5.20
   2  -1  -5  153.58    4.50
  -2   1   5  156.98    4.90
   2   1  -5  152.08    4.90
  -2   1   5  154.98    4.90
   1  -1  -5    3.70    0.60
  -1  -1   5    2.80    0.70
   1   1  -5    2.80    0.60
  -1   1   5    2.40    0.50
  -1   1   5    2.00    0.50
   0   1   5  258.77    7.80
  -2  -1  -5    7.40    1.00
   2   1   5    7.00    0.90
  -2   1  -5    5.70    0.90
  -3  -1  -5   11.30    1.30
   3  -1   5   13.10    1.40
   3   1   5   14.00    1.40
  -4  -1  -5  969.30   27.90
   4  -1   5 1002.80   27.80
  -4   1  -5  996.40   27.90
   4   1   5  990.60   27.80
   5  -1   5   39.60    2.30
  -5   1  -5   40.70    2.40
   6  -1   5  145.09    5.30
  -6   1  -5  147.19    5.70
  -7  -1  -5   95.79    4.60
  -7   1  -5   96.19    4.50
   7   1   5   89.19    4.00
  -8  -1  -5   39.30    3.10
  -8   1  -5   41.60    3.10
  -9  -1  -5   16.60    2.40
  -9   1  -5   16.60    2.40
 -10  -1  -5    0.40    1.30
 -10   1  -5    2.30    1.40
 -11  -1  -5    4.00    1.80
 -11   1  -5    2.90    1.80
 -11  -2   5    7.30    1.80
 -11   2   5    6.20    1.60
 -10  -2   5   17.80    2.60
 -10   2   5   18.50    2.30
  -9  -2   5   37.10    3.10
  -9   2   5   36.50    2.60
  -8  -2   5    0.20    1.00
  -8   2   5   -0.10    0.80
  -7  -2   5  218.88    7.00
  -7  -2   5  222.08    8.00
  -7   2   5  220.68    7.30
  -6  -2   5    2.40    1.00
  -6  -2   5    4.30    0.80
  -6   2   5    3.70    0.70
  -6   2   5    3.70    0.80
  -5  -2   5  344.77   10.60
  -5   2   5  331.57    9.80
  -5   2   5  317.87    9.50
   5   2  -5  335.07    9.20
  -4  -2   5  224.68    7.50
   4   2  -5  220.68    6.60
  -4   2   5  228.18    6.70
  -4   2   5  228.78    6.70
   3  -2  -5  442.66   12.20
  -3  -2   5  448.06   13.40
   3   2  -5  434.36   12.70
  -3   2   5  447.16   12.60
  -3   2   5  453.95   12.60
   3   2  -5  460.45   12.90
  -2  -2   5  769.42   21.70
   2   2  -5  763.92   21.40
  -2   2   5  745.63   21.10
  -2   2   5  785.62   21.00
   2   2  -5  755.32   21.30
   1  -2  -5  425.76   11.80
  -1   2   5  414.86   12.00
  -1   2   5  414.76   11.90
   1   2  -5  425.56   12.20
   0  -2  -5   10.80    0.90
   0   2  -5   11.10    1.10
   0   2   5   11.00    0.90
   2  -2   5  140.39    5.00
  -2  -2  -5  148.49    5.00
   2   2   5  141.49    4.90
  -2   2  -5  146.39    5.00
  -3  -2  -5  499.45   15.00
   3  -2   5  523.75   15.00
   3   2   5  507.05   14.90
   4  -2   5    1.10    0.70
  -4  -2  -5    1.80    0.80
  -4   2  -5    1.30    0.70
   4   2   5    1.10    0.70
   5  -2   5    1.50    0.70
  -5   2  -5    1.40    0.80
   5   2   5    1.50    0.70
  -6  -2  -5   -0.10    0.30
   6  -2   5   -0.20    0.60
  -6   2  -5   -0.60    0.70
   6   2   5   -0.30    0.70
  -7  -2  -5   66.29    3.80
  -7   2  -5   66.89    3.70
  -8  -2  -5   10.50    1.90
  -8   2  -5   10.30    1.80
  -9  -2  -5   65.49    4.20
  -9   2  -5   64.99    4.00
 -10  -2  -5   61.99    4.40
 -10   2  -5   70.19    4.30
 -11  -3   5   11.70    2.30
 -11   3   5    9.20    1.80
 -10  -3   5    3.00    1.50
 -10   3   5    3.60    1.30
  -9  -3   5    0.00    1.10
  -9   3   5    0.80    0.90
  -8  -3   5  279.97   10.10
  -8   3   5  289.07    9.20
  -7  -3   5   47.80    2.40
  -7  -3   5   42.50    3.00
  -7   3   5   47.00    2.40
  -6  -3   5    1.20    0.90
  -6  -3   5   -0.20    0.50
  -6   3   5    0.10    0.30
   6   3  -5    0.30    0.30
  -6   3   5    0.30    0.50
  -5  -3   5  392.86   11.60
  -5  -3   5  392.46   12.30
  -5   3   5  397.16   11.00
  -5   3   5  366.66   10.90
   5   3  -5  395.26   11.10
  -4  -3   5  102.99    4.30
  -4   3   5  100.49    3.20
   4   3  -5  102.49    3.60
  -4   3   5  105.19    3.20
  -3  -3   5   25.40    1.90
  -3   3   5   27.00    1.20
  -3   3   5   24.70    1.20
   3   3  -5   29.40    1.70
   3   3  -5   26.50    1.50
  -2  -3   5    2.20    0.80
  -2   3   5    2.20    0.50
   2   3  -5    3.00    0.70
  -2   3   5    2.60    0.50
   2   3  -5    2.60    0.70
   1  -3  -5   10.40    0.70
  -1   3   5   10.20    0.80
  -1   3   5   11.00    0.90
   1   3  -5   11.00    1.20
   0  -3  -5  669.63   18.80
   0   3   5  684.03   18.90
  -1  -3  -5   25.00    1.50
  -1   3  -5   27.70    1.60
   2  -3   5 2293.37   62.19
  -2  -3  -5 2269.97   61.99
   2   3   5 2292.27   61.99
  -3  -3  -5  615.14   18.20
   3  -3   5  638.94   18.20
   3   3   5  634.74   18.10
  -3   3  -5  634.04   18.20
   4  -3   5  201.38    6.80
  -4  -3  -5  209.58    7.10
  -4   3  -5  198.58    6.80
   4   3   5  206.78    6.80
  -5  -3  -5   -0.50    0.70
   5  -3   5    0.30    0.60
  -5   3  -5    0.60    0.70
   5   3   5    0.00    0.60
   6  -3   5  135.49    4.80
  -6   3  -5  133.29    5.30
   6   3   5  136.69    5.20
  -7  -3  -5   94.79    4.70
   7   3   5   91.89    4.10
  -7   3  -5   92.39    4.30
  -8  -3  -5   29.80    3.00
  -8   3  -5   30.60    2.60
  -9  -3  -5    8.80    2.00
  -9   3  -5    9.40    1.80
 -10  -3  -5    2.40    1.50
 -10   3  -5   -1.10    1.10
 -11  -4   5    3.30    1.70
 -11   4   5    4.60    1.40
 -10  -4   5   19.10    2.70
 -10   4   5   13.80    1.90
  -9  -4   5   42.20    3.40
  -9   4   5   41.60    2.60
  -8  -4   5   11.20    2.00
  -8   4   5    8.50    1.20
  -7  -4   5   20.00    1.90
  -7  -4   5   18.50    2.30
  -7   4   5   21.10    1.50
  -6  -4   5    6.80    1.40
  -6  -4   5    6.30    1.10
  -6   4   5    5.80    0.70
   6   4  -5    6.10    0.80
  -6   4   5    6.70    0.70
  -5  -4   5    2.90    0.80
  -5  -4   5    0.50    0.90
   5   4  -5    3.70    0.70
  -5   4   5    2.60    0.40
  -5   4   5    1.90    0.30
  -4  -4   5   17.60    1.40
  -4  -4   5   16.50    1.80
   4   4  -5   17.40    1.30
  -4   4   5   15.20    0.70
  -4   4   5   17.80    0.70
  -3  -4   5  179.18    6.40
   3  -4  -5  179.48    5.10
   3   4  -5  173.48    5.80
  -3   4   5  180.88    5.20
  -3   4   5  182.68    5.20
   2   4  -5   41.70    2.20
  -2   4   5   44.00    1.70
  -2   4   5   43.00    1.70
   1  -4  -5   14.50    0.80
  -1  -4   5   15.50    1.60
  -1   4   5   16.80    1.10
  -1   4   5   14.40    1.00
   0  -4  -5   22.00    1.30
   0  -4   5   16.20    1.50
   0   4  -5   26.00    1.60
   0   4   5   26.20    1.40
  -1  -4  -5  406.16   11.90
  -1   4  -5  414.26   12.30
   2  -4   5  411.76   12.30
  -2  -4  -5  417.06   12.10
   2   4   5  396.56   12.00
   3  -4   5  258.57    8.50
  -3  -4  -5  275.27    8.70
  -3   4  -5  276.57    8.60
   3   4   5  274.47    8.60
   4  -4   5  637.94   18.20
  -4  -4  -5  627.04   18.60
   4   4   5  626.14   18.30
  -4   4  -5  629.04   18.30
   5  -4   5  380.46   11.10
  -5  -4  -5  372.86   11.90
   5   4   5  371.56   11.50
  -5   4  -5  354.36   11.40
   6  -4   5    7.10    1.00
  -6  -4  -5    8.70    1.70
  -6   4  -5    5.50    1.20
   6   4   5    6.70    1.30
  -7  -4  -5  100.09    5.00
   7   4   5  105.79    4.60
  -7   4  -5  109.69    4.70
  -8  -4  -5    3.60    1.50
  -8   4  -5    2.40    1.20
  -9  -4  -5   -1.70    1.10
  -9   4  -5    1.10    1.10
 -10  -4  -5   19.20    2.90
 -10   4  -5   26.90    3.00
 -10  -5   5   15.00    2.50
 -10   5   5   15.60    1.90
  -9  -5   5    3.90    1.60
  -9   5   5    5.20    1.10
  -8  -5   5  226.78    8.80
  -8   5   5  234.58    7.40
  -7  -5   5   28.70    2.20
  -7  -5   5   33.20    2.80
  -7   5   5   33.20    1.60
  -6  -5   5    3.90    1.00
  -6  -5   5    1.80    1.10
  -6   5   5    4.40    0.50
   6   5  -5    2.90    0.70
  -5  -5   5   15.80    1.60
  -5  -5   5   14.40    1.90
   5   5  -5   15.00    1.40
  -4  -5   5  115.69    4.80
  -4  -5   5  110.79    4.40
   4   5  -5  108.79    4.10
   3  -5  -5   21.00    1.00
   3   5  -5   21.30    1.60
  -3   5   5   18.70    0.90
  -3   5   5   19.60    0.90
  -2  -5   5   69.39    3.30
  -2   5   5   69.19    2.40
   2   5  -5   69.19    3.20
  -2   5   5   66.79    2.40
   1  -5  -5 1785.92   48.40
  -1  -5   5 1824.52   49.80
  -1   5   5 1882.11   48.90
  -1   5   5 1851.31   48.90
   1   5  -5 1789.72   49.50
   1   5  -5 1707.13   49.60
   0  -5  -5  778.92   21.40
   0  -5   5  748.33   22.10
   0   5  -5  782.62   22.00
   0   5   5  777.12   21.50
  -1  -5  -5   85.99    3.20
   1   5   5   71.39    3.00
  -1   5  -5   88.19    3.50
   2  -5   5  621.64   18.10
  -2  -5  -5  626.54   18.00
  -2   5  -5  606.04   18.10
   2   5   5  649.83   18.00
   3  -5   5    5.60    1.00
  -3  -5  -5    4.80    1.10
  -3   5  -5    5.90    1.10
   3   5   5    3.00    0.80
   4  -5   5   30.50    1.90
  -4  -5  -5   29.00    2.20
  -4   5  -5   29.50    2.00
   4   5   5   25.50    2.00
  -5  -5  -5    6.30    1.40
   5  -5   5    6.60    0.90
   5   5   5    6.30    1.10
  -5   5  -5    6.30    1.20
  -6  -5  -5   10.30    1.80
  -6   5  -5    8.40    1.40
   6   5   5   11.60    1.60
  -7  -5  -5   57.69    3.70
   7   5   5   59.49    3.20
  -7   5  -5   53.69    3.20
  -8  -5  -5   42.50    3.40
  -8   5  -5   38.30    2.90
  -9  -5  -5    0.20    1.30
  -9   5  -5    1.20    1.10
 -10  -5  -5    8.60    2.20
 -10   5  -5    9.00    1.90
 -10  -6   5   13.20    2.50
  -9  -6   5    4.70    1.70
  -9   6   5    6.30    1.10
  -8  -6   5   56.39    3.90
  -8   6   5   55.59    2.50
  -7  -6   5  108.39    5.20
  -7  -6   5  106.49    4.70
  -7   6   5  105.59    3.40
  -6  -6   5    4.70    1.10
  -6  -6   5    3.80    1.30
   6   6  -5    7.70    1.10
  -5  -6   5   70.19    3.40
   5   6  -5   73.59    3.20
  -3  -6   5  454.45   14.40
  -3  -6   5  474.55   14.10
   3  -6  -5  458.65   13.00
   3   6  -5  470.15   14.10
   3   6  -5  466.45   13.90
  -3   6   5  453.95   12.70
  -3   6   5  478.65   12.70
  -2  -6   5   92.19    4.10
  -2   6   5   93.49    3.10
   2   6  -5   95.09    3.90
   2   6  -5  108.19    4.20
  -2   6   5   93.59    3.10
  -1  -6   5    2.00    0.80
  -1   6   5    1.60    0.50
   1   6  -5    3.10    0.90
  -1   6   5    1.30    0.40
   1   6  -5    1.60    0.80
   0  -6  -5   -0.30    0.40
   0  -6   5    0.00    0.60
   0   6   5    0.20    0.40
   0   6  -5    0.20    0.60
   0   6  -5    0.60    0.80
  -1  -6  -5    3.30    0.70
   1   6   5    3.50    0.80
  -1   6  -5    4.10    0.90
  -2  -6  -5  189.78    6.40
   2  -6   5  190.68    6.50
   2   6   5  186.38    6.30
  -2   6  -5  194.28    6.50
   3  -6   5   34.30    2.00
  -3  -6  -5   35.50    2.30
   3   6   5   35.60    2.10
  -3   6  -5   37.00    2.20
  -4  -6  -5   14.30    1.80
   4  -6   5   12.20    1.30
   4   6   5   15.20    1.70
  -4   6  -5   12.00    1.40
  -5  -6  -5   68.59    3.60
   5  -6   5   57.99    2.50
   5   6   5   57.69    3.10
  -5   6  -5   61.79    3.10
  -6  -6  -5  101.39    4.90
   6   6   5  108.49    4.60
  -6   6  -5  100.89    4.40
  -7  -6  -5  223.08    8.70
  -7   6  -5  230.78    8.00
   7   6   5  222.78    8.00
  -8  -6  -5  178.58    7.70
  -8   6  -5  186.48    7.10
  -9  -6  -5    5.50    1.80
  -9   6  -5    6.10    1.60
 -10  -6  -5    1.50    1.60
 -10   6  -5    1.90    1.30
 -10  -7   5    3.30    1.70
  -9  -7   5    9.10    2.20
  -8  -7   5   94.79    5.20
  -7  -7   5    4.90    1.60
  -6  -7   5   14.10    2.00
  -5  -7   5   22.20    2.10
   5   7  -5   21.40    1.80
  -4  -7   5  545.85   16.30
   4   7  -5  535.15   16.00
  -3  -7   5  287.87    9.70
  -3  -7   5  281.97    9.90
   3  -7  -5  298.17    8.70
   3   7  -5  307.17    9.60
  -3   7   5  296.17    8.30
  -3   7   5  299.07    8.30
   3   7  -5  313.27    9.90
  -2  -7   5  421.86   12.90
   2   7  -5  400.86   12.50
  -2   7   5  399.96   11.50
   2   7  -5  411.96   12.70
  -2   7   5  410.36   11.60
  -1  -7   5  176.98    6.60
  -1   7   5  177.98    5.70
  -1   7   5  185.68    5.70
   1   7  -5  188.18    6.70
   1   7  -5  181.68    6.40
   0  -7  -5   68.39    2.60
   0  -7   5   65.99    3.30
   0   7  -5   75.59    3.50
   0   7   5   69.69    2.80
   0   7  -5   72.79    3.30
  -1   7  -5   64.59    3.00
   2  -7   5  396.56   12.20
  -2  -7  -5  402.06   12.10
   2   7   5  407.96   12.10
  -2   7  -5  397.86   12.30
  -3  -7  -5  145.89    5.50
   3  -7   5  142.09    5.10
   3   7   5  149.49    5.40
  -3   7  -5  140.99    5.30
  -4  -7  -5  344.17   11.10
   4  -7   5  347.57   10.30
   4   7   5  333.77   10.90
  -4   7  -5  347.07   10.80
   5  -7   5    6.90    0.80
  -5  -7  -5    5.40    1.40
  -5   7  -5    5.90    1.20
   5   7   5    9.50    1.50
  -6  -7  -5   -0.20    1.00
  -6   7  -5    1.90    0.90
   6   7   5   -0.40    0.80
  -7  -7  -5   17.40    2.40
   7   7   5   13.80    1.90
  -7   7  -5   13.80    1.80
  -8  -7  -5   81.79    4.90
  -8   7  -5   77.09    4.10
   8   7   5   77.79    4.10
  -9  -7  -5    2.20    1.60
  -9   7  -5    3.30    1.30
 -10  -7  -5   27.60    3.50
 -10   7  -5   20.70    2.60
 -10  -8   5    5.60    1.90
  -9  -8   5    2.10    1.50
  -8  -8   5   12.40    2.20
  -7  -8   5    2.00    1.40
  -6  -8   5   46.90    3.30
   6   8  -5   40.20    2.50
  -5  -8   5  565.14   18.10
   5   8  -5  596.44   17.30
  -4  -8   5  194.58    7.40
   4   8  -5  191.28    6.80
  -3  -8   5  210.78    7.60
  -3  -8   5  211.08    7.80
   3  -8  -5  208.58    6.60
   3   8  -5  220.18    7.70
  -3   8   5  211.58    6.20
  -3   8   5  215.88    6.20
   3   8  -5  215.68    7.40
   2  -8  -5  635.24   18.30
  -2  -8   5  648.54   19.30
   2   8  -5  645.54   19.20
  -2   8   5  639.04   17.80
   2   8  -5  638.94   18.90
  -2   8   5  645.44   17.80
  -1  -8   5  537.05   16.20
  -1   8   5  530.25   15.30
   1   8  -5  527.75   16.30
   1   8  -5  535.65   16.00
  -1   8   5  541.95   15.20
   0  -8  -5    7.40    0.80
   0  -8   5    7.70    1.30
   0   8  -5    5.80    1.10
   0   8  -5    5.80    1.20
   0   8   5    6.50    1.00
   2  -8   5   18.50    1.60
  -2  -8  -5   16.10    1.60
  -2   8  -5   17.20    1.80
   2   8   5   19.80    1.60
   3  -8   5   99.09    3.90
  -3  -8  -5  106.89    4.40
  -3   8  -5   98.79    4.20
   3   8   5  104.89    4.30
  -4  -8  -5   52.49    3.00
   4  -8   5   47.60    2.20
  -4   8  -5   44.70    2.70
   4   8   5   47.60    2.80
  -5  -8  -5   50.99    3.30
   5   8   5   52.39    3.10
  -5   8  -5   56.99    3.00
  -6  -8  -5  112.29    5.50
  -6   8  -5  121.79    5.00
   6   8   5  119.69    5.10
  -7  -8  -5  247.18    9.30
   7   8   5  235.88    8.50
  -7   8  -5  232.38    8.40
  -8  -8  -5   20.60    2.90
   8   8   5   20.20    2.40
  -8   8  -5   16.00    2.10
  -9  -8  -5    3.00    1.70
  -9   8  -5    4.30    1.40
 -10  -8  -5    2.00    1.70
 -10   8  -5    2.20    1.30
 -10  -9   5   26.10    3.50
  -9  -9   5    3.10    1.50
  -8  -9   5   65.79    4.40
  -7  -9   5    4.80    1.70
  -6  -9   5    1.30    1.30
   6   9  -5    0.80    0.80
  -5  -9   5   -0.10    1.10
   5   9  -5    1.00    0.80
  -4  -9   5  402.56   13.10
   4   9  -5  391.26   12.50
  -3  -9   5   24.10    2.50
   3  -9  -5   29.30    1.70
  -3   9   5   29.40    1.30
  -3   9   5   30.20    1.30
   3   9  -5   27.40    2.20
   3   9  -5   22.30    2.30
  -2  -9   5  680.03   20.30
   2  -9  -5  673.13   19.40
   2   9  -5  693.53   20.40
  -2   9   5  690.83   19.00
   2   9  -5  660.53   20.00
  -2   9   5  679.73   19.00
  -1  -9   5   13.70    1.80
   1   9  -5    8.90    1.40
  -1   9   5   11.80    1.30
   1   9  -5    5.50    1.30
  -1   9   5   11.00    1.20
   0  -9  -5   40.30    1.80
   0  -9   5   41.80    2.60
   0   9  -5   46.30    2.60
   0   9  -5   34.90    2.60
   0   9   5   40.80    2.20
   1  -9   5    0.10    0.30
  -1  -9  -5    1.00    0.60
  -1   9  -5   -0.10    0.20
  -1   9  -5    0.60    0.80
   1   9   5    1.50    0.70
   2  -9   5   11.80    1.40
  -2  -9  -5    9.10    1.30
  -2   9  -5   11.10    1.50
   2   9   5    5.80    1.00
  -2   9  -5   14.00    2.00
  -3  -9  -5   84.99    3.70
   3  -9   5   74.59    3.20
  -3   9  -5   65.79    3.50
   3   9   5   82.09    3.70
  -4  -9  -5  480.05   14.80
   4  -9   5  465.65   13.40
  -4   9  -5  472.25   14.50
   4   9   5  471.95   14.60
  -5  -9  -5  131.59    5.70
   5   9   5  120.59    5.30
  -5   9  -5  131.59    5.20
  -6  -9  -5   69.79    4.20
  -6   9  -5   69.69    3.70
   6   9   5   72.39    3.90
  -7  -9  -5    4.00    1.50
   7   9   5    3.50    1.30
  -7   9  -5    3.70    1.20
  -8  -9  -5  151.28    7.00
   8   9   5  145.99    6.20
  -8   9  -5  134.79    5.90
  -9  -9  -5    1.80    1.70
  -9   9  -5    2.40    1.30
 -10  -9  -5   46.90    4.60
 -10   9  -5   43.80    3.40
 -10 -10   5    2.50    1.80
  -9 -10   5    0.30    1.30
  -8 -10   5   -0.30    1.30
  -7 -10   5   89.39    5.10
  -6 -10   5   30.30    3.20
   6  10  -5   32.40    2.50
  -5 -10   5  336.87   11.80
   5  10  -5  335.97   11.10
  -4 -10   5    0.60    1.10
  -4  10   5    0.90    0.30
  -4  10   5    1.20    0.40
   4  10  -5    0.30    0.80
  -3 -10   5   45.30    3.10
   3 -10  -5   46.90    2.40
   3  10  -5   46.00    2.90
  -3  10   5   46.30    1.90
  -3  10   5   46.50    1.90
   3  10  -5   51.59    3.20
   2 -10  -5   32.80    2.10
  -2 -10   5   31.50    2.60
   2  10  -5   32.60    2.40
   2  10  -5   29.40    2.50
  -2  10   5   30.70    1.70
  -2  10   5   34.20    1.80
  -1 -10   5  967.70   27.60
   1 -10  -5  977.00   27.20
  -1  10   5  938.11   26.60
   1  10  -5  931.41   27.80
   1  10  -5  957.10   27.50
   0 -10  -5    2.80    0.60
   0 -10   5    3.20    1.00
   0  10  -5    1.50    0.70
   0  10   5    3.30    0.90
   0  10  -5    4.40    1.00
  -2 -10  -5   27.40    1.90
   2 -10   5   27.60    1.90
  -2  10  -5   29.20    2.20
  -2  10  -5   29.60    2.90
  -3 -10  -5   14.30    1.80
   3 -10   5   15.70    1.30
   3  10   5   15.10    1.80
  -3  10  -5   14.10    1.80
  -3  10  -5   16.20    2.20
  -4 -10  -5    1.30    1.00
  -4  10  -5    1.70    1.00
   4  10   5    3.40    1.20
  -5 -10  -5   12.90    2.10
  -5  10  -5   12.90    1.80
   5  10   5   13.40    2.00
  -6 -10  -5   29.90    3.10
  -6  10  -5   28.30    2.70
   6  10   5   29.70    2.60
  -7 -10  -5  399.56   14.00
   7  10   5  411.16   13.40
  -7  10  -5  406.46   13.20
  -8 -10  -5    5.30    1.90
   8  10   5    4.20    1.50
  -8  10  -5    6.80    1.60
  -9 -10  -5   29.60    3.60
  -9  10  -5   28.80    3.00
  -9 -11   5    2.20    1.60
  -8 -11   5    0.00    1.40
  -7 -11   5    4.60    1.80
  -6 -11   5   37.70    3.70
   6  11  -5   41.20    2.90
  -5 -11   5   34.50    3.40
   5  11  -5   38.30    2.70
  -4 -11   5  216.28    8.30
  -4  11   5  207.88    6.30
   4  11  -5  221.58    7.90
  -3 -11   5  153.78    6.60
   3 -11  -5  157.48    5.80
  -3  11   5  160.48    5.20
   3  11  -5  168.58    6.80
  -3  11   5  164.78    5.20
   3  11  -5  164.78    6.40
   2 -11  -5  625.04   18.10
  -2 -11   5  600.94   18.70
   2  11  -5  593.84   18.60
   2  11  -5  609.94   19.00
  -2  11   5  624.14   17.50
  -2  11   5  629.44   17.60
  -1 -11   5  243.58    8.80
   1 -11  -5  259.27    8.60
   1  11  -5  264.07    9.30
   1  11  -5  246.38    8.80
  -1  11   5  249.68    8.00
   0 -11   5   13.50    1.70
   0 -11  -5   13.90    1.00
   0  11  -5    9.90    1.50
   0  11   5   14.90    1.60
   2 -11   5   90.29    3.70
  -2 -11  -5   95.09    3.90
  -2  11  -5   91.79    4.70
  -2  11  -5   79.39    4.10
   3 -11   5   15.10    1.40
  -3 -11  -5   14.40    1.80
  -3  11  -5   10.60    1.60
   3  11   5   14.10    1.90
  -3  11  -5   13.30    2.00
  -4 -11  -5  416.16   13.40
  -4  11  -5  419.46   13.30
   4  11   5  428.26   13.40
  -4  11  -5  407.06   14.00
  -5 -11  -5   19.80    2.40
  -5  11  -5   18.30    2.20
   5  11   5   18.80    2.20
  -5  11  -5   25.70    3.00
  -6 -11  -5   45.90    3.50
   6  11   5   39.40    3.00
  -6  11  -5   39.60    2.90
  -7 -11  -5    7.50    1.90
  -7  11  -5    2.00    1.20
   7  11   5    3.60    1.50
  -8 -11  -5   10.90    2.50
   8  11   5   11.00    2.00
  -8  11  -5   11.80    2.00
  -9 -11  -5   -0.10    1.60
  -9  11  -5    0.70    1.20
  -9 -12   5   17.70    3.10
  -8 -12   5    1.30    1.50
  -7 -12   5   20.70    2.80
  -6 -12   5    2.90    1.50
   6  12  -5    5.50    1.50
  -5 -12   5  148.29    6.90
  -5  12   5  156.78    4.70
   5  12  -5  160.08    6.40
  -4 -12   5    0.20    1.10
   4  12  -5    0.90    1.00
  -4  12   5    0.70    0.50
   3 -12  -5    0.60    0.80
  -3 -12   5    2.20    1.20
   3  12  -5    1.60    1.20
  -3  12   5    0.80    0.60
   3  12  -5    1.50    1.20
   2 -12  -5    4.20    1.10
  -2 -12   5    5.00    1.30
  -2  12   5    3.10    0.80
   2  12  -5    4.60    1.40
   2  12  -5    1.90    1.10
  -1 -12   5  722.23   21.40
  -1  12   5  707.03   20.50
   1  12  -5  727.33   22.00
   1  12  -5  708.93   21.40
   0 -12  -5   86.49    3.10
   0 -12   5   88.49    4.10
   0  12   5   92.99    3.90
  -1 -12  -5   75.99    3.30
  -1  12  -5   89.59    4.60
   1  12   5   92.79    4.00
  -2 -12  -5   37.80    2.40
   2 -12   5   40.90    2.30
   2  12   5   32.70    2.40
  -2  12  -5   33.60    2.60
  -2  12  -5   39.90    3.10
  -3 -12  -5  104.19    4.60
  -3  12  -5  103.29    4.70
   3  12   5   95.99    4.60
  -3  12  -5   95.89    5.10
  -4 -12  -5   31.30    2.70
   4  12   5   32.60    2.70
  -4  12  -5   31.60    3.30
  -4  12  -5   35.30    2.70
  -5 -12  -5   -1.70    0.90
  -5  12  -5   -0.40    0.90
  -5  12  -5    0.60    1.10
   5  12   5    1.70    1.20
  -6 -12  -5   10.90    2.10
  -6  12  -5    6.00    1.50
  -6  12  -5    6.90    1.90
   6  12   5    7.70    1.80
  -7 -12  -5   95.29    5.40
   7  12   5   83.79    4.60
  -7  12  -5   87.39    4.50
  -7  12  -5   83.19    5.00
  -8 -12  -5   32.30    3.70
  -8  12  -5   34.40    3.20
   8  12   5   32.30    3.20
  -8  12  -5   34.40    3.70
  -9 -12  -5   16.20    3.00
  -9  12  -5   22.40    2.70
  -9 -13   5   -0.10    1.50
  -8 -13   5   20.20    3.00
  -7 -13   5    2.60    1.60
  -6 -13   5   24.70    3.10
   6  13  -5   23.40    2.60
  -5 -13   5   26.00    3.00
  -5  13   5   25.50    1.40
   5  13  -5   23.70    2.60
  -4 -13   5    1.60    1.30
   4  13  -5   -0.50    0.80
  -4  13   5    1.30    0.60
  -3 -13   5   11.30    1.90
   3 -13  -5   14.30    1.70
  -3  13   5   13.20    1.30
   3  13  -5   12.30    2.10
   3  13  -5   14.00    2.00
  -2 -13   5   13.00    1.90
   2  13  -5   12.90    2.00
   2  13  -5   13.30    2.00
  -2  13   5   12.90    1.40
  -1 -13   5  229.38    8.20
   1  13  -5  217.78    8.30
  -1  13   5  226.98    7.60
   1  13  -5  227.18    8.80
   0 -13   5  392.36   12.20
   0  13   5  369.46   11.80
   0  13  -5  365.06   12.50
   0  13  -5  390.86   13.10
  -1 -13  -5  101.29    3.90
   1  13   5  104.29    4.50
  -1  13  -5  103.49    5.30
  -1  13  -5   91.09    4.70
   2 -13   5   90.19    3.70
  -2 -13  -5   92.09    4.00
  -2  13  -5   90.19    4.50
   2  13   5   87.99    4.30
  -2  13  -5   89.29    4.90
  -3 -13  -5    2.50    1.10
   3  13   5    4.60    1.30
  -3  13  -5    3.90    1.30
  -3  13  -5    2.50    1.30
  -4 -13  -5  122.29    5.30
   4  13   5  108.19    5.20
  -4  13  -5  111.79    5.20
  -4  13  -5  117.69    5.80
  -5 -13  -5   25.30    2.80
  -5  13  -5   28.80    2.90
  -5  13  -5   26.50    3.10
   5  13   5   31.30    3.10
  -6 -13  -5    3.60    1.70
   6  13   5    4.70    1.50
  -6  13  -5    3.00    1.30
  -6  13  -5    5.20    1.80
  -7 -13  -5    0.10    1.30
  -7  13  -5    0.30    1.10
  -7  13  -5    1.00    1.30
   7  13   5   -2.20    1.00
  -8 -13  -5   33.00    3.80
  -8  13  -5   43.70    3.70
   8  13   5   46.90    3.60
  -8  13  -5   39.60    3.20
  -8 -14   5    1.30    1.70
  -7 -14   5    8.20    2.20
  -6 -14   5   44.70    3.80
   6  14  -5   43.60    3.40
  -5 -14   5   13.10    2.30
  -5  14   5   15.60    1.30
   5  14  -5   13.20    2.10
  -4 -14   5    6.90    1.80
  -4  14   5    5.70    1.00
   4  14  -5    5.50    1.60
  -3 -14   5    1.80    1.20
  -3  14   5    0.20    0.60
   3  14  -5    1.20    1.20
  -2 -14   5   67.99    3.90
  -2  14   5   71.59    3.30
   2  14  -5   65.79    4.20
   2  14  -5   63.19    3.90
  -1 -14   5  152.08    6.30
   1  14  -5  154.08    6.90
  -1  14   5  155.78    5.80
   1  14  -5  156.78    6.60
   0 -14   5    2.80    1.10
   0  14   5    4.00    1.20
   0  14  -5    2.50    1.20
   0  14  -5    2.70    1.40
  -1 -14  -5   21.80    1.70
   1  14   5   21.10    2.20
  -1  14  -5   21.00    2.70
  -1  14  -5   25.10    2.80
  -2 -14  -5   74.29    3.60
  -2  14  -5   77.59    4.20
  -2  14  -5   75.69    4.70
   2  14   5   80.99    4.10
  -3 -14  -5   79.39    4.00
  -3  14  -5   82.29    4.30
   3  14   5   86.79    4.40
  -3  14  -5   74.29    4.70
  -4 -14  -5   69.79    3.90
   4  14   5   64.49    3.90
  -4  14  -5   61.89    3.80
  -4  14  -5   66.59    4.30
  -5 -14  -5  100.09    5.10
   5  14   5   88.19    4.80
  -5  14  -5   92.69    4.70
  -5  14  -5   93.69    5.30
  -6 -14  -5   55.89    4.10
  -6  14  -5   58.09    3.70
  -6  14  -5   60.49    4.30
   6  14   5   62.59    4.10
  -7 -14  -5   -0.20    1.40
  -7  14  -5    0.30    1.10
   7  14   5   -0.60    1.20
  -7  14  -5    0.60    1.00
  -8 -14  -5   -1.20    1.40
  -8  14  -5   -0.10    1.30
   8  14   5    0.40    1.40
  -8  14  -5    1.60    1.30
  -8 -15   5    9.20    2.50
  -8 -15   5   10.00    2.50
  -7 -15   5    9.80    2.40
  -6 -15   5   13.40    2.40
   6  15  -5   22.20    2.80
  -5 -15   5    2.40    1.50
   5  15  -5    0.60    1.20
  -5  15   5    0.70    0.60
  -4 -15   5  114.09    5.90
  -4  15   5  121.69    4.60
   4  15  -5  135.49    6.10
  -3 -15   5   43.60    3.40
   3  15  -5   46.10    3.40
  -3  15   5   42.10    2.50
  -2 -15   5  108.89    5.30
  -2  15   5  111.99    4.60
   2  15  -5  119.79    5.60
   2  15  -5  108.49    5.70
  -1 -15   5   57.09    3.50
  -1  15   5   59.29    3.20
   1  15  -5   57.19    4.00
   1  15  -5   47.30    3.50
   0 -15   5  250.47    8.70
   0  15  -5  249.68    9.80
   0  15  -5  249.18    9.30
   0  15   5  242.18    8.60
   1  15   5   62.29    3.60
  -1  15  -5   70.79    4.10
  -1  15  -5   64.19    4.40
  -2 -15  -5    2.10    1.00
  -2  15  -5    0.10    1.10
   2  15   5    0.90    1.00
  -2  15  -5    1.00    1.30
  -3 -15  -5   33.00    2.60
   3  15   5   35.10    2.90
  -3  15  -5   36.70    3.00
  -3  15  -5   28.50    3.30
  -4 -15  -5   96.89    4.80
  -4  15  -5   88.29    5.30
  -4  15  -5   91.09    4.80
   4  15   5   95.69    4.90
  -5 -15  -5    2.10    1.40
  -5  15  -5    6.00    1.60
  -5  15  -5    4.20    1.70
   5  15   5    3.00    1.50
  -6 -15  -5   38.20    3.70
  -6  15  -5   37.70    3.90
   6  15   5   34.40    3.40
  -6  15  -5   40.90    3.20
  -7 -15  -5    0.10    1.50
  -7  15  -5    0.20    1.20
  -7  15  -5    0.10    1.10
   7  15   5   -1.30    1.10
  -8 -15  -5    7.90    2.40
  -8  15  -5   11.10    2.10
   8  15   5   13.90    2.50
  -7 -16   5    4.20    1.90
  -6 -16   5   -0.70    1.40
   6  16  -5    0.60    1.20
  -5 -16   5   50.59    3.90
  -5  16   5   49.60    2.50
   5  16  -5   48.30    3.70
  -4 -16   5   25.30    3.00
   4  16  -5   26.60    3.00
  -4  16   5   27.80    2.00
  -3 -16   5  152.88    6.70
   3  16  -5  143.69    6.70
  -3  16   5  148.19    5.60
  -2 -16   5   39.20    3.00
   2  16  -5   27.80    3.40
   2  16  -5   34.00    3.40
  -2  16   5   29.60    2.40
  -1 -16   5    0.30    1.00
   1  16  -5    0.50    1.30
   1  16  -5    0.00    1.10
  -1  16   5    0.10    0.80
   0 -16   5    7.30    1.50
   0  16   5    5.40    1.40
   0  16  -5    5.60    1.80
   0  16  -5    2.20    1.30
  -1  16  -5   53.39    3.70
   1  16   5   55.79    3.50
  -1  16  -5   61.89    4.20
  -2  16  -5    0.80    1.50
  -2  16  -5    1.20    1.20
   2  16   5    0.20    1.10
  -3 -16  -5  133.99    5.90
   3  16   5  116.79    5.80
  -3  16  -5  131.79    6.00
  -3  16  -5  130.99    6.60
  -4 -16  -5    1.60    1.20
   4  16   5    2.70    1.40
  -4  16  -5    1.80    1.30
  -4  16  -5    2.20    1.50
  -5 -16  -5   62.69    4.10
  -5  16  -5   60.79    4.60
  -5  16  -5   62.29    4.00
   5  16   5   70.19    4.40
  -6 -16  -5    4.20    1.80
   6  16   5    4.60    1.70
  -6  16  -5    5.30    1.80
  -6  16  -5    3.60    1.50
  -7 -16  -5   -0.20    1.40
  -7  16  -5   -1.10    1.00
   7  16   5   -0.20    1.30
  -7  16  -5   -1.80    1.20
  -7 -17   5   14.20    2.90
  -7 -17   5    7.20    2.30
  -6 -17   5   61.99    4.60
  -6 -17   5   56.49    4.50
   6  17  -5   49.90    4.00
  -5 -17   5    4.50    1.80
  -5  17   5    1.00    0.80
   5  17  -5    3.10    1.60
  -4 -17   5    3.10    1.50
   4  17  -5    0.70    1.30
  -4  17   5    3.20    1.00
  -3 -17   5   -0.90    1.10
   3  17  -5   -0.90    1.20
  -3  17   5    0.80    0.90
  -2 -17   5    0.80    1.10
  -2  17   5    1.40    1.00
   2  17  -5    0.10    1.30
   2  17  -5    0.20    1.20
  -1 -17   5   80.09    4.20
   1  17  -5   82.89    4.80
  -1  17   5   80.49    4.10
   1  17  -5   73.09    4.90
   0  17  -5  217.98    8.80
   0  17  -5  215.88    9.30
   0  17   5  224.88    8.20
   1  17   5    7.90    1.80
  -1  17  -5    6.70    1.80
  -1  17  -5    8.80    2.00
  -2  17  -5    7.60    2.00
   2  17   5    3.40    1.40
  -2  17  -5    2.70    1.40
   3  17   5   28.30    3.00
  -3  17  -5   43.10    4.20
  -3  17  -5   29.50    3.20
  -4  17  -5    7.80    1.90
   4  17   5   10.60    2.10
  -4  17  -5    9.50    2.20
  -5 -17  -5   50.39    3.60
  -5  17  -5   45.60    4.10
   5  17   5   52.39    3.90
  -5  17  -5   44.80    3.60
  -6 -17  -5    4.90    1.90
  -6  17  -5    7.30    2.10
  -6  17  -5   11.30    2.30
   6  17   5   10.70    2.20
  -7 -17  -5    0.80    1.60
  -7  17  -5    1.30    1.20
   7  17   5   -1.20    1.30
  -6 -18   5    0.70    1.80
  -6 -18   5    2.30    1.80
   6  18  -5    2.70    1.50
  -5 -18   5   55.49    4.40
  -5 -18   5   52.29    4.30
  -5  18   5   46.00    2.90
   5  18  -5   54.29    4.20
  -4 -18   5   27.80    3.30
  -4 -18   5   24.10    3.00
   4  18  -5   20.30    3.00
  -4  18   5   25.10    2.20
  -3 -18   5   66.09    4.20
  -3 -18   5   58.19    4.00
   3  18  -5   58.19    4.30
  -3  18   5   61.29    3.40
  -2 -18   5    5.70    1.60
  -2 -18   5    5.00    1.50
   2  18  -5    4.20    1.70
  -2  18   5    3.90    1.20
   1  18  -5   17.30    2.90
   1  18  -5   15.70    2.60
  -1  18   5   13.30    2.00
   0  18  -5    8.50    2.20
   0  18  -5   14.40    2.50
   0  18   5   16.60    2.30
   1  18   5   14.10    2.20
  -1  18  -5    7.20    2.10
  -1  18  -5    9.60    2.10
   2  18   5    0.10    1.10
  -2  18  -5    1.00    1.40
  -2  18  -5    2.60    1.70
   3  18   5   48.40    3.60
  -3  18  -5   45.70    4.60
  -3  18  -5   36.30    3.70
  -4  18  -5   14.90    2.80
   4  18   5   11.20    2.20
  -4  18  -5   10.90    2.20
  -5  18  -5   14.10    2.70
   5  18   5   19.50    2.80
  -5  18  -5   16.00    2.60
   6  18   5   -0.60    1.40
  -6  18  -5    2.50    1.40
  -5 -19   5    2.20    1.80
  -5 -19   5    3.40    1.90
  -5  19   5    2.00    1.10
   5  19  -5    7.20    2.20
  -4 -19   5   28.00    3.50
  -4 -19   5   30.10    3.50
  -4  19   5   28.10    2.50
   4  19  -5   33.80    3.80
  -3 -19   5    0.90    1.40
  -3 -19   5   -0.30    1.30
  -3  19   5    0.00    1.00
   3  19  -5    1.90    1.50
   2  19  -5   11.20    2.40
  -2  19   5    9.60    1.70
   1  19  -5   11.20    2.30
  -1  19   5   16.70    2.30
   1  19  -5   10.50    2.40
   0  19  -5   60.49    4.20
   0  19  -5   52.29    4.30
   0  19   5   52.49    3.70
  -1  19  -5    2.50    1.50
  -1  19  -5    0.30    1.50
   1  19   5    1.60    1.40
  -2  19  -5   14.90    2.70
   2  19   5   18.40    2.60
  -2  19  -5   20.20    2.90
  -3  19  -5   35.00    4.10
  -3  19  -5   28.50    3.50
   3  19   5   24.00    3.10
   4  19   5   42.50    4.10
  -4  19  -5   33.70    3.70
   5  19   5   52.49    4.30
  -5  19  -5   48.70    3.90
  -5 -20   5   45.10    4.40
  -5  20   5   40.70    2.90
   5  20  -5   35.90    4.00
  -4  20   5    6.80    1.50
   4  20  -5    8.40    2.20
   3  20  -5    6.10    2.10
  -3  20   5   10.90    1.90
   2  20  -5   27.70    3.60
  -2  20   5   28.10    2.90
   1  20  -5   22.40    3.10
  -1  20   5   30.20    3.10
   0  20  -5    4.30    1.80
   0  20   5    2.80    1.50
  -1  20  -5   21.80    3.00
   1  20   5   26.10    3.10
   2  20   5   17.10    2.60
  -2  20  -5   10.80    2.40
  -3  20  -5   33.40    3.70
   3  20   5   24.70    3.20
   4  20   5    0.10    1.50
  -4  20  -5   -0.60    1.30
  -3  21   5   -1.50    1.10
   3  21  -5   -0.70    1.50
   2  21  -5   26.30    3.50
  -2  21   5   18.20    2.50
  -1  21   5    0.40    1.20
   1  21  -5    0.30    1.50
   0  21  -5   54.59    4.40
   0  21   5   51.69    3.80
   1  21   5    8.10    2.10
  -1  21  -5    9.40    2.40
   2  21   5   15.90    2.60
  -2  21  -5   18.40    3.00
   3  21   5   -0.30    1.40
  -3  21  -5   -1.60    1.30
  -2  22   5   -0.80    1.10
  -1  22   5   27.70    3.20
   1  22  -5   29.30    3.70
   0  22  -5   12.50    2.70
   0  22   5   14.40    2.50
  -1  22  -5   52.59    4.50
   1  22   5   47.60    4.00
 -11   0   6    0.70    1.30
 -10   0   6   17.10    2.40
  -9   0   6   -0.50    0.90
  -8   0   6  424.06   13.60
  -7   0   6   -0.10    0.80
  -6   0   6  115.79    4.70
  -5   0   6    1.80    0.80
  -5   0   6    0.30    0.50
  -4   0   6    2.70    0.70
  -4   0   6    3.80    0.90
   4   0  -6    3.10    0.50
   3   0  -6   -0.10    0.40
   3   0  -6   -0.30    0.20
  -3   0   6   -0.40    0.40
  -3   0   6   -0.30    0.50
   2   0  -6 1101.39   29.90
  -2   0   6 1082.39   30.30
   1   0  -6    0.80    0.50
  -1   0   6   -0.80    0.40
   0   0  -6  452.35   13.20
   1   0   6   -0.60    0.40
  -1   0  -6    0.10    0.40
   2   0   6  536.95   15.70
  -2   0  -6  538.25   15.70
  -3   0  -6    0.20    0.60
   3   0   6   -0.40    0.50
   4   0   6   74.49    3.50
  -4   0  -6   80.79    3.60
   5   0   6   -1.00    0.60
  -5   0  -6    0.00    0.30
  -6   0  -6   14.20    1.90
  -7   0  -6   -0.60    0.90
   7   0   6   -0.30    0.80
  -8   0  -6   44.50    3.30
  -9   0  -6   -0.80    1.10
 -10   0  -6   19.30    2.80
 -11  -1   6   42.70    3.60
 -11   1   6   43.70    3.40
 -10  -1   6   -0.60    1.10
 -10   1   6    1.20    1.20
  -9  -1   6   40.80    3.10
  -9   1   6   37.30    2.90
  -8  -1   6   14.50    2.10
  -8   1   6   15.20    1.90
  -7  -1   6   58.79    3.40
  -7   1   6   64.09    3.30
  -6  -1   6    7.30    1.40
  -6   1   6    8.10    1.30
  -5  -1   6  650.93   19.10
  -5   1   6  628.24   18.30
  -5   1   6  666.23   18.70
  -4  -1   6   19.00    1.80
   4   1  -6   15.70    1.10
  -4   1   6   18.60    1.40
   4   1  -6   17.10    0.80
  -4   1   6   18.50    1.30
   3  -1  -6   89.49    3.00
  -3  -1   6   84.89    3.60
   3   1  -6   86.89    3.00
   3   1  -6   89.19    3.20
  -3   1   6   87.49    3.30
  -3   1   6   86.19    3.20
   2  -1  -6  735.23   19.90
  -2  -1   6  716.63   20.70
   2   1  -6  748.43   20.30
  -2   1   6  720.13   20.30
  -2   1   6  707.43   20.30
  -1  -1   6  126.19    4.60
   1  -1  -6  122.79    4.20
   1   1  -6  130.39    4.40
  -1   1   6  125.69    4.40
   0  -1  -6   53.49    2.40
   0  -1   6   57.19    2.60
   0   1  -6   51.29    2.40
   1  -1   6  393.96   11.80
   1   1   6  374.86   11.60
  -1   1  -6  399.06   11.70
   2  -1   6   23.00    1.70
  -2  -1  -6   23.90    1.70
  -2   1  -6   22.70    1.70
   2   1   6   25.50    1.70
   3  -1   6   46.90    2.60
  -3  -1  -6   49.30    2.60
  -3   1  -6   49.10    2.60
   3   1   6   49.60    2.60
   4  -1   6   43.30    2.50
  -4  -1  -6   49.99    2.70
   4   1   6   44.60    2.50
   6  -1   6    1.60    0.80
  -6  -1  -6    1.30    1.00
   6   1   6   -0.60    0.70
  -6   1  -6    1.90    1.00
  -7  -1  -6  101.79    4.80
  -7   1  -6   94.69    4.70
  -8  -1  -6    2.70    1.30
  -8   1  -6    2.90    1.30
  -9  -1  -6   29.00    3.20
  -9   1  -6   27.60    3.10
 -10  -1  -6    2.20    1.60
 -10   1  -6    3.00    1.60
 -10  -2   6   58.59    4.10
 -10   2   6   55.79    3.50
  -9  -2   6    3.20    1.30
  -9   2   6    3.80    1.20
  -8  -2   6   43.50    3.20
  -8   2   6   46.70    2.80
  -7  -2   6    4.30    1.30
  -7   2   6    5.60    1.10
  -6  -2   6  143.19    5.70
  -6   2   6  137.09    5.00
  -5  -2   6  529.45   15.60
  -5   2   6  516.95   14.70
   5   2  -6  497.95   13.90
  -5   2   6  496.75   14.50
  -4  -2   6  123.69    4.80
  -4   2   6  114.49    4.10
  -4   2   6  120.29    4.00
   4   2  -6  120.89    4.20
   4   2  -6  117.19    3.90
  -3  -2   6   40.20    2.40
   3   2  -6   45.60    2.00
   3   2  -6   48.00    2.20
  -3   2   6   43.10    2.00
  -3   2   6   44.20    2.00
   2  -2  -6 1112.39   28.40
  -2  -2   6 1047.60   29.60
   2   2  -6 1020.30   29.10
  -2   2   6 1029.80   28.90
  -2   2   6 1054.49   29.00
   1  -2  -6   99.69    3.40
  -1   2   6   95.19    3.50
   1   2  -6   98.39    3.70
   0  -2  -6  424.76   12.10
   0  -2   6  412.46   12.50
   0   2   6  409.86   12.10
   1  -2   6  251.37    8.00
  -1   2  -6  254.97    8.00
   1   2   6  237.68    7.70
  -2  -2  -6  747.33   21.10
   2  -2   6  760.12   21.30
   2   2   6  722.43   21.00
  -2   2  -6  729.03   21.20
   3  -2   6  146.09    5.30
  -3  -2  -6  142.79    5.30
   3   2   6  141.89    5.20
  -3   2  -6  146.49    5.30
  -4  -2  -6  696.63   20.60
   4   2   6  715.43   20.40
   5  -2   6  101.99    4.20
  -5  -2  -6  101.29    4.50
   5   2   6   98.59    4.30
   6  -2   6   19.70    1.90
  -6  -2  -6   13.40    1.90
   6   2   6   20.10    2.00
  -6   2  -6   17.60    2.00
  -7  -2  -6   58.69    3.60
  -7   2  -6   48.00    3.20
   7   2   6   52.99    3.10
  -8  -2  -6   17.50    2.30
  -8   2  -6   24.10    2.60
  -9  -2  -6    1.50    1.30
  -9   2  -6   -0.70    1.10
 -10  -2  -6   30.70    3.50
 -10   2  -6   24.30    3.00
 -10  -3   6   10.70    2.10
 -10   3   6    9.10    1.70
  -9  -3   6    4.20    1.50
  -9   3   6    7.00    1.40
  -8  -3   6   41.00    3.20
  -8   3   6   35.30    2.40
  -7  -3   6  136.09    6.00
  -7   3   6  145.29    5.20
  -6  -3   6    3.70    1.10
  -6   3   6    3.50    0.80
  -5  -3   6  223.78    8.00
  -5   3   6  220.88    6.70
   5   3  -6  230.48    6.70
  -5   3   6  220.18    6.90
  -4  -3   6   37.20    2.50
  -4   3   6   34.00    1.60
  -4   3   6   34.30    1.60
   4   3  -6   37.60    1.80
  -3  -3   6  121.49    4.90
  -3   3   6  122.09    4.10
  -3   3   6  123.59    4.00
   3   3  -6  122.79    4.30
  -2  -3   6   39.90    2.40
   2   3  -6   39.70    2.10
  -2   3   6   38.20    1.80
  -2   3   6   36.40    1.80
   1  -3  -6    0.90    0.40
  -1  -3   6    0.40    0.60
   1   3  -6   -0.10    0.30
  -1   3   6    1.50    0.60
   0  -3  -6  614.44   18.00
   0  -3   6  643.64   18.70
   0   3   6  652.33   18.20
   0   3  -6  655.13   18.50
  -1  -3  -6  838.82   24.10
   1  -3   6  866.41   24.50
  -1   3  -6  888.41   24.40
   1   3   6  853.51   24.10
  -2  -3  -6   15.90    1.60
   2  -3   6   14.20    1.60
   2   3   6   13.90    1.40
  -2   3  -6   15.90    1.60
  -3  -3  -6  141.69    5.30
   3   3   6  144.49    5.20
  -4  -3  -6   11.50    1.60
   4  -3   6   12.10    1.50
   4   3   6   10.70    1.50
  -4   3  -6   10.90    1.40
  -5  -3  -6  146.19    5.80
   5  -3   6  143.89    5.40
  -5   3  -6  147.99    5.60
   5   3   6  140.89    5.50
  -6  -3  -6  174.48    6.90
   6  -3   6  176.18    6.20
   6   3   6  176.28    6.50
  -6   3  -6  176.78    6.60
  -7  -3  -6   92.79    4.80
   7   3   6  100.19    4.40
  -7   3  -6   90.79    4.50
  -8  -3  -6   23.80    2.80
  -8   3  -6   21.00    2.40
  -9  -3  -6   23.10    2.90
  -9   3  -6   18.40    2.40
 -10  -3  -6    4.00    1.80
 -10   3  -6    2.50    1.50
 -10  -4   6   93.89    5.40
 -10   4   6   94.19    4.50
  -9  -4   6   63.89    4.20
  -9   4   6   62.69    3.30
  -8  -4   6    0.70    1.20
  -8   4   6    1.00    0.80
  -7  -4   6  157.98    6.50
  -7   4   6  142.49    5.10
  -6  -4   6    0.40    0.90
  -6   4   6    0.10    0.50
  -5  -4   6   50.99    3.20
   5   4  -6   53.09    2.30
  -5   4   6   44.60    1.90
  -5   4   6   50.89    2.00
  -4  -4   6   75.79    3.70
  -4   4   6   78.49    2.60
  -4   4   6   71.39    2.60
   4   4  -6   77.09    3.30
   4   4  -6   73.59    3.00
  -3  -4   6   15.10    1.80
  -3   4   6   16.20    1.00
  -3   4   6   16.10    1.00
   3   4  -6   15.40    1.30
   3   4  -6   14.70    1.50
  -2   4   6 1451.35   39.60
  -2   4   6 1485.55   39.50
   2   4  -6 1421.16   40.20
   1  -4  -6   15.80    1.00
  -1  -4   6   17.60    1.80
   1   4  -6   20.20    1.50
  -1   4   6   19.00    1.20
  -1   4   6   17.40    1.20
   0  -4   6   79.99    3.60
   0  -4  -6   80.99    3.10
   0   4   6   84.39    3.20
   0   4  -6   85.09    3.50
   1  -4   6  101.39    4.20
  -1  -4  -6   99.39    3.80
  -1   4  -6  102.09    4.10
  -2  -4  -6  624.44   17.90
   2  -4   6  569.84   18.00
   2   4   6  630.44   17.90
  -2   4  -6  656.23   18.20
  -3  -4  -6   12.60    1.50
   3   4   6   13.20    1.50
  -4  -4  -6  103.99    4.50
   4  -4   6  107.69    4.30
   4   4   6  114.09    4.40
  -4   4  -6  103.49    4.40
   5  -4   6  139.49    5.20
  -5  -4  -6  132.79    5.60
  -5   4  -6  141.89    5.40
   5   4   6  136.89    5.30
  -6  -4  -6    2.60    1.20
   6  -4   6    1.90    0.80
   6   4   6    2.30    1.00
  -6   4  -6    4.00    1.20
  -7  -4  -6    2.60    1.30
  -7   4  -6    5.70    1.40
   7   4   6    2.40    1.10
  -8  -4  -6   25.70    2.90
  -8   4  -6   22.80    2.50
  -9  -4  -6   -2.40    0.90
  -9   4  -6    0.20    1.20
 -10  -4  -6   35.00    3.80
 -10   4  -6   30.70    3.30
 -10  -5   6    0.50    1.40
 -10   5   6    1.80    1.00
  -9  -5   6    1.30    1.30
  -9   5   6   -0.70    0.70
  -8  -5   6   15.30    2.30
  -8   5   6   16.50    1.60
  -7  -5   6  176.58    7.20
  -7   5   6  166.58    5.50
  -6  -5   6   32.50    2.20
  -6  -5   6   37.10    2.90
   6   5  -6   36.10    1.90
  -6   5   6   35.20    1.60
  -5  -5   6   43.90    3.00
  -5   5   6   42.60    1.60
   5   5  -6   43.60    2.20
  -5   5   6   46.50    1.70
  -4  -5   6   85.29    4.30
   4   5  -6  100.19    3.80
  -4   5   6   97.59    3.10
   4   5  -6   98.59    4.00
  -4   5   6   98.19    3.10
  -3   5   6   11.40    0.80
  -3   5   6   11.00    0.90
   3   5  -6   12.40    1.50
  -2  -5   6    7.80    1.40
  -2   5   6    5.80    0.80
   2   5  -6    5.30    1.00
   2   5  -6    6.30    1.10
  -2   5   6    7.00    0.80
   1  -5  -6  109.59    3.40
  -1  -5   6  107.39    4.60
   1   5  -6  123.89    4.60
  -1   5   6  110.59    3.90
  -1   5   6  109.49    3.80
   1   5  -6  105.49    4.30
   0  -5   6   27.20    2.00
   0  -5  -6   24.40    1.40
   0   5  -6   25.30    1.80
   0   5   6   25.10    1.60
   1  -5   6  772.92   22.30
  -1  -5  -6  751.32   21.70
  -1   5  -6  793.52   22.30
  -2  -5  -6  181.28    6.20
   2   5   6  178.28    6.10
  -2   5  -6  183.78    6.40
   3  -5   6    8.90    1.30
  -3  -5  -6    8.30    1.30
  -3   5  -6   11.30    1.50
   3   5   6    7.50    1.20
  -4  -5  -6   92.89    4.20
   4  -5   6   92.59    4.00
  -4   5  -6   93.79    4.10
   4   5   6  104.09    4.20
  -5  -5  -6  251.27    8.90
   5  -5   6  251.67    8.30
  -5   5  -6  259.17    8.70
   5   5   6  256.47    8.60
  -6  -5  -6   67.09    3.90
   6   5   6   67.09    3.50
  -6   5  -6   65.79    3.50
  -7  -5  -6   24.80    2.70
   7   5   6   21.10    2.30
  -7   5  -6   26.20    2.60
  -8  -5  -6    0.70    1.20
  -8   5  -6    2.10    1.20
  -9  -5  -6   78.89    4.80
  -9   5  -6   80.79    4.50
 -10  -5  -6    2.00    1.60
 -10   5  -6   -0.80    1.20
 -10  -6   6   32.40    3.60
  -9  -6   6   13.00    2.40
  -9   6   6   10.20    1.40
  -8  -6   6    0.10    1.20
  -8   6   6    0.60    0.60
  -7  -6   6   39.50    3.30
  -7   6   6   43.90    1.90
  -6  -6   6    2.70    0.90
  -6  -6   6    1.10    1.10
   6   6  -6    2.20    0.80
  -6   6   6    1.80    0.40
  -5  -6   6   44.10    3.10
  -5  -6   6   44.80    2.70
  -5   6   6   45.70    1.50
   5   6  -6   41.60    2.30
  -5   6   6   45.90    1.60
  -4   6   6  143.99    4.60
  -4   6   6  156.88    4.50
   4   6  -6  162.98    5.80
  -3  -6   6  274.37    9.50
   3  -6  -6  268.57    8.00
   3   6  -6  278.87    8.90
  -3   6   6  281.77    8.00
  -3   6   6  280.67    8.10
   3   6  -6  275.27    9.10
  -2  -6   6  526.95   16.30
  -2   6   6  536.95   15.10
  -2   6   6  530.75   15.10
   2   6  -6  528.35   15.90
   2   6  -6  556.54   16.20
  -1  -6   6   28.80    2.20
   1  -6  -6   29.30    1.10
   1   6  -6   33.70    2.30
  -1   6   6   27.80    1.60
  -1   6   6   31.40    1.60
   1   6  -6   26.10    2.00
   0  -6  -6   50.09    2.20
   0  -6   6   52.29    2.90
   0   6   6   53.49    2.40
   0   6  -6   55.59    2.80
  -1  -6  -6  359.36   10.90
   1  -6   6  355.56   11.50
  -1   6  -6  378.26   11.50
   1   6   6  367.96   11.10
  -2  -6  -6  546.55   16.20
   2   6   6  565.24   16.30
   3  -6   6  126.79    4.80
  -3  -6  -6  113.49    4.70
  -3   6  -6  113.79    4.70
   3   6   6  124.79    4.70
   4  -6   6  193.98    6.50
  -4  -6  -6  191.48    6.90
  -4   6  -6  190.08    6.80
   4   6   6  174.08    6.60
  -5  -6  -6   26.70    2.70
   5  -6   6   27.30    1.80
  -5   6  -6   24.50    2.20
   5   6   6   24.90    2.10
  -6  -6  -6  100.99    4.90
  -6   6  -6   99.69    4.50
   6   6   6   95.89    4.50
  -7  -6  -6   14.90    2.30
   7   6   6   12.30    1.90
  -7   6  -6   10.20    1.70
  -8  -6  -6   34.50    3.40
  -8   6  -6   37.00    2.90
  -9  -6  -6    7.90    2.10
  -9   6  -6    6.50    1.70
 -10  -6  -6    9.20    2.20
 -10   6  -6    9.70    2.10
 -10  -7   6   -0.30    1.40
  -9  -7   6    3.80    1.70
  -8  -7   6   12.30    2.30
  -7  -7   6  443.96   14.90
  -6  -7   6    9.10    1.80
   6   7  -6    7.80    1.20
  -5  -7   6    2.20    1.20
  -5  -7   6    4.10    1.10
   5   7  -6    4.40    1.00
  -4  -7   6   -0.30    0.20
  -4   7   6   -0.20    0.30
  -4   7   6   -0.50    0.30
   4   7  -6   -0.20    0.60
   4   7  -6    1.30    0.90
   3  -7  -6  367.86   10.60
  -3  -7   6  374.16   12.10
   3   7  -6  364.06   11.50
   3   7  -6  369.46   11.70
  -3   7   6  362.16   10.40
  -3   7   6  361.56   10.40
  -2  -7   6  231.78    8.30
  -2   7   6  230.38    7.10
   2   7  -6  235.48    7.90
   2   7  -6  233.98    8.20
  -2   7   6  235.68    7.10
  -1  -7   6   21.30    2.10
   1   7  -6   26.90    2.00
   1   7  -6   25.20    2.10
  -1   7   6   27.10    1.60
   0  -7   6    4.90    1.20
   0  -7  -6    6.40    0.80
   0   7  -6    6.50    1.20
   0   7   6    5.80    0.90
   0   7  -6    6.40    1.20
  -1  -7  -6    0.60    0.50
   1  -7   6    1.60    0.80
  -1   7  -6    0.30    0.60
   1   7   6    1.30    0.70
  -2  -7  -6    3.30    0.90
   2   7   6    3.10    0.90
  -3  -7  -6  294.47    9.70
   3  -7   6  299.47    9.60
  -3   7  -6  308.17    9.90
   3   7   6  295.07    9.70
  -4  -7  -6   39.10    2.70
   4  -7   6   39.80    2.30
   4   7   6   42.50    2.60
  -4   7  -6   39.40    2.60
   5  -7   6   76.29    3.20
  -5  -7  -6   80.69    4.10
   5   7   6   76.29    3.80
  -5   7  -6   82.69    3.90
  -6  -7  -6  267.37    9.60
   6   7   6  266.27    9.30
  -6   7  -6  264.77    9.20
  -7  -7  -6  144.19    6.40
  -7   7  -6  134.49    5.80
   7   7   6  140.69    5.90
  -8  -7  -6    0.00    1.20
  -8   7  -6    1.10    1.10
   8   7   6   -0.30    0.90
  -9  -7  -6    2.90    1.70
  -9   7  -6    3.80    1.50
 -10  -7  -6    2.50    1.70
 -10   7  -6    1.30    1.40
 -10  -8   6   19.00    3.10
  -9  -8   6    4.80    1.90
  -8  -8   6    0.50    1.40
  -7  -8   6    7.50    1.90
  -6  -8   6  247.98    9.60
   6   8  -6  256.77    8.50
  -5  -8   6   40.70    3.10
   5   8  -6   38.00    2.50
   4  -8  -6   54.29    2.10
  -4  -8   6   58.49    3.60
  -4   8   6   51.79    1.90
  -4   8   6   54.29    1.90
   4   8  -6   53.89    3.00
   4   8  -6   51.89    3.10
  -3  -8   6    3.70    1.20
   3  -8  -6    4.80    0.80
   3   8  -6    3.30    1.00
  -3   8   6    3.70    0.60
   3   8  -6    1.90    0.90
  -3   8   6    3.70    0.60
  -2  -8   6  218.38    8.10
   2   8  -6  218.38    7.70
   2   8  -6  231.08    8.10
  -2   8   6  220.58    6.80
  -2   8   6  220.18    6.80
  -1  -8   6   85.09    4.10
   1   8  -6   81.69    3.80
  -1   8   6   81.89    3.20
   1   8  -6   80.19    4.00
   0  -8   6    8.20    1.50
   0  -8  -6    6.40    0.80
   0   8  -6    7.10    1.30
   0   8  -6    4.70    1.20
   0   8   6    6.20    1.00
  -1  -8  -6    2.90    0.70
   1  -8   6    0.80    0.80
   1   8   6    2.90    0.80
  -1   8  -6    2.50    1.00
  -2  -8  -6  778.22   21.20
   2   8   6  695.93   21.20
  -3  -8  -6   34.20    2.30
   3  -8   6   36.80    2.30
  -3   8  -6   34.00    2.40
   3   8   6   39.30    2.50
   4  -8   6   88.39    3.60
  -4  -8  -6   86.19    4.20
  -4   8  -6   87.09    4.10
   4   8   6   82.19    4.00
  -5  -8  -6    5.10    1.40
   5   8   6    3.10    1.10
  -5   8  -6    4.30    1.20
  -6  -8  -6  290.67   10.40
  -6   8  -6  277.97    9.90
   6   8   6  300.87   10.10
  -7  -8  -6    0.60    1.20
  -7   8  -6    1.40    1.10
   7   8   6    1.00    1.10
  -8  -8  -6   17.80    2.80
   8   8   6   19.10    2.40
  -8   8  -6   23.10    2.60
  -9  -8  -6    3.60    1.80
  -9   8  -6    3.20    1.40
 -10  -8  -6   10.40    2.50
 -10   8  -6   12.10    2.20
 -10  -9   6    3.90    1.90
  -9  -9   6    4.20    1.70
  -8  -9   6   13.20    2.50
  -7  -9   6  294.67   11.00
  -6  -9   6   21.40    2.70
   6   9  -6   17.90    1.90
  -5  -9   6   23.00    2.70
   5   9  -6   31.60    2.30
   4  -9  -6    1.50    0.50
  -4  -9   6    0.50    1.10
  -4   9   6    1.90    0.40
   4   9  -6    1.30    0.90
   4   9  -6    2.30    1.00
  -4   9   6    1.60    0.40
   3  -9  -6 1168.08   32.70
  -3  -9   6 1172.68   34.20
  -3   9   6 1204.88   32.30
   3   9  -6 1201.98   34.00
   3   9  -6 1183.28   33.60
  -3   9   6 1173.48   32.30
   2  -9  -6   14.80    1.50
  -2  -9   6   12.10    1.80
   2   9  -6   14.00    1.80
   2   9  -6   16.50    2.00
  -2   9   6   13.70    1.20
  -2   9   6   14.30    1.20
  -1  -9   6  218.08    7.80
   1   9  -6  209.38    7.80
   1   9  -6  201.88    7.50
  -1   9   6  214.18    6.80
   0  -9  -6   96.09    3.40
   0  -9   6  100.59    4.50
   0   9   6  102.19    3.90
   0   9  -6   98.19    4.40
   0   9  -6   95.39    4.60
   1  -9   6   41.00    2.60
  -1  -9  -6   40.90    2.10
   1   9   6   37.10    2.30
  -2  -9  -6    8.10    1.20
  -3  -9  -6  119.99    4.90
   3  -9   6  125.19    4.80
   3   9   6  120.69    5.00
  -3   9  -6  121.69    5.20
   4  -9   6   29.20    1.90
  -4  -9  -6   29.90    2.70
   4   9   6   26.90    2.30
  -4   9  -6   26.60    2.30
  -5  -9  -6   97.39    4.70
   5   9   6   89.49    4.40
  -5   9  -6   92.09    4.40
  -6  -9  -6   11.40    2.10
   6   9   6   11.90    1.90
  -6   9  -6   12.00    1.90
  -7  -9  -6  147.09    6.80
  -7   9  -6  145.19    6.20
   7   9   6  149.59    6.30
  -8  -9  -6    3.20    1.60
  -8   9  -6    4.40    1.50
   8   9   6    2.60    1.30
  -9  -9  -6   10.80    2.40
  -9   9  -6   12.40    2.10
  -9 -10   6    2.40    1.70
  -8 -10   6    9.90    2.30
  -7 -10   6    2.20    1.50
  -6 -10   6  256.57   10.00
   6  10  -6  270.57    9.20
  -5 -10   6    7.90    1.80
   5  10  -6    7.30    1.50
   4 -10  -6   40.50    2.10
  -4 -10   6   39.00    3.20
  -4  10   6   44.60    1.80
   4  10  -6   47.60    3.10
   4  10  -6   45.40    2.90
  -3 -10   6   -0.40    1.00
   3 -10  -6    0.30    0.60
   3  10  -6    1.70    1.10
  -3  10   6    0.50    0.50
  -3  10   6    0.60    0.50
   3  10  -6    1.60    1.00
  -2 -10   6  408.86   13.50
   2 -10  -6  418.46   12.60
  -2  10   6  419.76   12.20
   2  10  -6  399.96   13.20
   2  10  -6  421.06   13.60
  -2  10   6  422.56   12.30
  -1 -10   6    8.50    1.60
   1  10  -6    9.30    1.70
  -1  10   6    8.20    1.10
   1  10  -6   11.20    1.80
   0 -10  -6   52.09    2.20
   0 -10   6   60.69    3.30
   0  10   6   51.49    2.70
   0  10  -6   52.09    3.40
   0  10  -6   55.99    3.20
   3 -10   6    9.20    1.30
  -3 -10  -6   10.60    1.50
   3  10   6   11.10    1.60
  -3  10  -6    7.30    1.50
  -4 -10  -6  223.48    8.30
  -4  10  -6  225.38    8.20
   4  10   6  238.98    8.30
  -5 -10  -6    7.20    1.60
   5  10   6    7.40    1.60
  -5  10  -6   10.70    1.80
  -6 -10  -6  199.38    7.90
  -6  10  -6  193.68    7.40
   6  10   6  181.28    7.40
  -7 -10  -6    2.40    1.40
  -7  10  -6    5.20    1.50
   7  10   6    3.50    1.50
  -8 -10  -6   39.60    3.90
   8  10   6   39.20    3.20
  -8  10  -6   41.60    3.20
  -9 -10  -6    3.30    1.80
  -9  10  -6    2.10    1.40
  -9 -11   6    1.20    1.70
  -8 -11   6   -0.10    1.30
  -7 -11   6  102.39    5.70
  -6 -11   6   88.59    5.10
   6  11  -6   88.59    4.40
  -5 -11   6    7.00    1.80
   5  11  -6    9.00    1.60
  -5  11   6    7.60    0.70
  -4 -11   6   87.59    4.70
   4 -11  -6   78.89    3.40
  -4  11   6   77.59    2.90
   4  11  -6   78.29    4.40
   4  11  -6   87.39    4.20
  -3 -11   6 1001.80   29.30
   3 -11  -6  978.50   27.90
  -3  11   6  956.20   27.30
   3  11  -6 1015.60   29.30
   3  11  -6  998.40   28.80
  -2 -11   6  114.29    5.40
   2 -11  -6  110.49    4.60
   2  11  -6  114.89    5.40
   2  11  -6  118.09    5.20
  -2  11   6  112.59    4.20
  -1 -11   6    8.70    1.60
   1 -11  -6    9.00    1.50
   1  11  -6   10.10    1.70
   1  11  -6   10.20    1.80
  -1  11   6    9.80    1.30
   0 -11   6    0.80    0.90
   0 -11  -6   -0.10    0.40
   0  11  -6    0.00    0.60
   0  11   6   -0.20    0.70
   0  11  -6   -0.10    0.80
   1 -11   6   27.20    2.20
  -1 -11  -6   24.30    1.70
   1  11   6   17.80    1.90
  -2 -11  -6  167.88    5.80
   2 -11   6  126.39    5.60
  -2  11  -6  168.98    6.50
  -2  11  -6  169.18    6.90
   3 -11   6   -0.10    0.60
  -3 -11  -6   -0.70    0.80
  -3  11  -6   -0.70    1.10
  -3  11  -6    1.30    1.00
   3  11   6    0.40    0.80
  -4 -11  -6   67.99    3.70
   4  11   6   63.19    3.60
  -4  11  -6   68.69    3.80
  -4  11  -6   54.69    3.90
  -5 -11  -6  141.89    6.20
  -5  11  -6  138.79    5.90
   5  11   6  138.19    6.00
  -6 -11  -6   -0.10    1.10
   6  11   6    0.20    1.10
  -6  11  -6    1.00    1.10
  -7 -11  -6   35.90    3.60
   7  11   6   40.20    3.20
  -7  11  -6   39.50    3.10
  -8 -11  -6    3.10    1.80
  -8  11  -6    3.00    1.40
   8  11   6    6.40    1.80
  -9 -11  -6    9.30    2.40
  -9  11  -6   11.70    2.20
  -9 -12   6    1.40    1.60
  -8 -12   6    4.50    1.90
  -7 -12   6   15.90    2.70
  -6 -12   6   58.99    4.30
   6  12  -6   59.59    3.70
  -5 -12   6   46.70    3.80
   5  12  -6   52.49    3.40
  -5  12   6   53.29    2.10
  -4 -12   6   50.39    3.60
  -4  12   6   45.50    2.10
   4  12  -6   42.80    3.10
  -3 -12   6   63.79    4.00
   3 -12  -6   60.49    3.10
  -3  12   6   62.89    2.70
   3  12  -6   69.09    3.90
   3  12  -6   61.39    3.90
  -2 -12   6  224.08    8.30
   2 -12  -6  211.88    7.50
   2  12  -6  221.28    8.50
  -2  12   6  208.78    7.00
   2  12  -6  205.48    8.00
  -1 -12   6    4.30    1.30
   1  12  -6    3.30    1.20
  -1  12   6    2.40    0.90
   1  12  -6    2.00    1.30
   0 -12   6   34.50    2.60
   0 -12  -6   30.90    1.60
   0  12   6   36.50    2.30
   0  12  -6   34.10    2.90
   0  12  -6   37.60    2.80
   1 -12   6   17.00    1.90
  -1 -12  -6   16.80    1.60
   1  12   6   16.30    1.90
  -1  12  -6   14.60    2.00
  -1  12  -6   14.90    2.30
   2 -12   6  498.15   15.30
  -2 -12  -6  510.75   15.30
  -2  12  -6  522.85   16.10
   2  12   6  500.65   15.60
  -2  12  -6  514.95   16.70
  -3 -12  -6  165.78    6.20
   3  12   6  157.88    6.40
  -3  12  -6  166.98    7.20
  -3  12  -6  151.28    6.50
  -4 -12  -6    1.60    1.10
   4  12   6    1.40    1.10
  -4  12  -6    1.10    1.00
  -4  12  -6   -0.10    1.10
  -5 -12  -6   33.20    3.20
  -5  12  -6   31.30    3.40
  -5  12  -6   33.80    2.90
   5  12   6   35.70    2.90
  -6 -12  -6   40.50    3.40
  -6  12  -6   41.90    3.60
  -6  12  -6   41.80    3.10
   6  12   6   39.80    3.20
  -7 -12  -6   41.60    4.00
  -7  12  -6   27.10    3.30
  -7  12  -6   28.00    3.00
   7  12   6   39.30    3.20
  -8 -12  -6   14.20    2.60
  -8  12  -6   19.50    2.60
   8  12   6   15.80    2.50
  -9  12  -6    8.40    2.00
  -8 -13   6    1.70    1.70
  -7 -13   6   23.10    3.30
  -6 -13   6   25.50    3.20
   6  13  -6   25.90    2.80
  -5 -13   6   17.90    2.70
   5  13  -6   20.40    2.50
  -5  13   6   16.80    1.30
  -4 -13   6  180.88    7.80
  -4  13   6  191.68    6.10
   4  13  -6  190.38    7.50
  -3 -13   6  163.88    6.80
   3 -13  -6  143.49    5.70
  -3  13   6  144.39    5.20
   3  13  -6  146.09    6.70
   3  13  -6  159.68    6.50
  -2 -13   6   69.19    4.10
  -2  13   6   73.59    3.30
   2  13  -6   73.59    4.40
   2  13  -6   76.39    4.20
  -1 -13   6   37.50    2.90
  -1  13   6   31.30    2.30
   1  13  -6   34.90    2.90
   1  13  -6   36.00    3.50
   0 -13   6  122.99    5.40
   0  13  -6  125.09    6.00
   0  13  -6  135.59    5.80
   0  13   6  118.09    5.00
   1 -13   6  108.29    4.70
  -1 -13  -6  108.89    4.10
  -1  13  -6  110.09    5.10
  -1  13  -6  108.69    5.60
   1  13   6  100.49    4.60
   2 -13   6  189.38    6.50
  -2 -13  -6  176.08    6.40
   2  13   6  163.28    6.80
  -2  13  -6  186.78    7.90
  -2  13  -6  188.08    7.30
  -3 -13  -6   20.80    2.20
  -3  13  -6   17.60    2.30
   3  13   6   22.80    2.40
  -3  13  -6   13.70    2.30
  -4 -13  -6   74.59    4.00
  -4  13  -6   73.89    4.10
  -4  13  -6   69.79    4.40
   4  13   6   62.69    3.90
  -5 -13  -6   95.59    5.00
   5  13   6   95.69    4.90
  -5  13  -6   93.59    4.90
  -5  13  -6   90.09    5.40
  -6 -13  -6    1.30    1.40
   6  13   6    3.40    1.40
  -6  13  -6    3.60    1.40
  -6  13  -6    1.90    1.50
  -7 -13  -6   48.70    3.90
   7  13   6   42.20    3.50
  -7  13  -6   45.70    4.00
  -7  13  -6   42.50    3.40
  -8 -13  -6   14.20    2.60
  -8  13  -6   17.50    2.50
   8  13   6   17.60    2.70
  -8  13  -6   13.20    2.70
  -8 -14   6    4.40    2.00
  -7 -14   6    3.00    1.70
  -6 -14   6   13.40    2.50
   6  14  -6   12.10    2.10
  -5 -14   6    9.80    2.10
  -5  14   6    6.40    0.90
   5  14  -6    7.50    1.70
  -4 -14   6    1.50    1.30
  -4  14   6    1.80    0.70
   4  14  -6    3.00    1.30
  -3 -14   6    0.30    1.20
   3  14  -6    0.30    1.10
  -3  14   6    1.80    0.80
   3  14  -6    0.20    1.00
  -2 -14   6  133.79    5.90
   2  14  -6  134.49    6.30
   2  14  -6  128.19    5.90
  -2  14   6  114.99    4.80
  -1 -14   6   22.00    2.60
   1  14  -6   15.10    2.20
   1  14  -6   12.90    2.30
  -1  14   6   17.10    1.90
   0 -14   6   19.60    2.30
   0  14  -6   23.80    3.00
   0  14  -6   19.60    2.50
   0  14   6   20.80    2.20
   1 -14   6    6.50    1.30
  -1  14  -6    7.20    1.60
  -1  14  -6    3.70    1.60
   1  14   6    8.30    1.60
  -2 -14  -6   84.69    3.90
  -2  14  -6   96.39    5.40
   2  14   6   91.89    4.50
  -2  14  -6   93.69    4.80
  -3 -14  -6   79.29    3.90
   3  14   6   73.19    4.10
  -3  14  -6   72.19    4.70
  -3  14  -6   69.49    4.20
  -4 -14  -6   84.59    4.40
  -4  14  -6   90.99    5.30
   4  14   6   85.89    4.60
  -4  14  -6   77.89    4.50
  -5 -14  -6   46.20    3.50
   5  14   6   41.00    3.30
  -5  14  -6   42.80    3.30
  -5  14  -6   34.90    3.70
  -6 -14  -6   13.80    2.40
  -6  14  -6    9.80    2.20
   6  14   6   14.70    2.30
  -6  14  -6   15.00    2.30
  -7 -14  -6    1.00    1.50
   7  14   6    3.00    1.60
  -7  14  -6    2.40    1.40
  -7  14  -6    0.80    1.40
  -8 -14  -6    3.00    1.90
  -8  14  -6    2.40    1.60
   8  14   6    2.30    1.60
  -8  14  -6    3.70    1.50
  -8 -15   6    0.50    1.70
  -7 -15   6   17.20    2.90
  -6 -15   6    1.70    1.60
   6  15  -6    0.30    1.20
  -5 -15   6  145.39    7.10
   5  15  -6  150.98    6.70
  -5  15   6  150.68    5.20
  -4 -15   6   24.90    3.00
  -4  15   6   27.80    1.90
   4  15  -6   25.10    3.00
  -3 -15   6    4.70    1.70
  -3  15   6    5.90    1.10
   3  15  -6    2.90    1.50
   3  15  -6    3.30    1.40
  -2 -15   6   -0.70    1.00
   2  15  -6    1.50    1.40
  -2  15   6    0.10    0.80
   2  15  -6    1.00    1.20
  -1 -15   6    2.50    1.30
   1  15  -6    1.10    1.20
   1  15  -6    1.40    1.30
  -1  15   6    0.60    0.90
   0 -15   6  211.18    7.80
   0  15  -6  205.88    8.30
   0  15  -6  209.58    8.80
   0  15   6  202.68    7.60
   1 -15   6  140.29    5.70
  -1  15  -6  150.58    7.00
   1  15   6  137.79    5.90
  -1  15  -6  144.29    6.50
   2  15   6   -0.60    0.90
  -2  15  -6    1.60    1.20
  -2  15  -6    3.10    1.60
  -3 -15  -6   33.80    2.70
  -3  15  -6   43.30    3.80
  -3  15  -6   40.60    3.30
   3  15   6   43.60    3.20
  -4 -15  -6    0.30    1.10
   4  15   6    2.70    1.50
  -4  15  -6    0.00    1.20
  -4  15  -6    1.30    1.40
  -5 -15  -6   43.40    3.50
  -5  15  -6   50.59    4.10
   5  15   6   50.09    3.70
  -5  15  -6   52.99    3.70
  -6 -15  -6   13.10    2.30
   6  15   6   14.20    2.30
  -6  15  -6   17.90    2.60
  -6  15  -6   18.20    2.90
  -7 -15  -6   26.70    3.30
   7  15   6   30.70    3.30
  -7  15  -6   34.20    3.50
  -7  15  -6   34.50    3.90
  -7 -16   6    3.80    2.00
  -6 -16   6   -0.30    1.40
   6  16  -6    0.70    1.20
  -5 -16   6   17.40    2.80
  -5  16   6   14.90    1.60
   5  16  -6   17.10    2.50
  -4 -16   6   18.80    2.80
   4  16  -6   17.00    2.50
  -4  16   6   14.30    1.60
  -3 -16   6   28.30    3.20
  -3  16   6   28.90    2.20
   3  16  -6   25.80    3.00
  -2 -16   6   37.80    3.10
   2  16  -6   43.10    3.50
  -2  16   6   36.20    2.60
   2  16  -6   34.90    3.70
  -1 -16   6    0.20    1.10
   1  16  -6   -1.40    1.10
   1  16  -6    0.60    1.20
  -1  16   6   -0.40    0.90
   0 -16   6   25.20    2.60
   0  16   6   29.30    2.50
   0  16  -6   30.80    3.70
   0  16  -6   27.30    3.10
   1  16   6   14.80    2.10
  -1  16  -6    9.90    2.40
  -1  16  -6    9.70    2.10
  -2  16  -6    7.00    1.80
   2  16   6    9.90    2.00
  -2  16  -6    7.50    2.10
   3  16   6    1.20    1.30
  -3  16  -6    1.20    1.30
  -3  16  -6    0.10    1.30
  -4 -16  -6  233.58    8.80
  -4  16  -6  231.78    9.10
  -4  16  -6  220.58    9.70
   4  16   6  221.78    8.90
  -5 -16  -6    1.50    1.30
   5  16   6    4.10    1.60
  -5  16  -6    4.10    1.60
  -5  16  -6    3.80    1.80
  -6 -16  -6   14.40    2.50
  -6  16  -6    8.60    2.00
  -6  16  -6    8.80    2.20
   6  16   6   11.40    2.30
  -7 -16  -6    7.10    2.10
   7  16   6    7.80    2.00
  -7  16  -6    5.70    1.80
  -6 -17   6   10.90    2.50
   6  17  -6   13.00    2.40
  -5 -17   6   53.49    4.20
  -5  17   6   49.00    2.70
   5  17  -6   52.29    4.00
  -4 -17   6    5.20    1.80
  -4  17   6    1.60    0.90
   4  17  -6    7.20    2.00
  -3 -17   6   21.10    2.90
  -3  17   6   22.60    2.20
   3  17  -6   24.90    3.10
  -2 -17   6    0.20    1.20
   2  17  -6    1.40    1.40
  -2  17   6    0.10    0.90
   2  17  -6    1.50    1.60
  -1 -17   6   25.20    2.80
  -1  17   6   31.10    2.60
   1  17  -6   30.40    3.40
   1  17  -6   28.00    3.40
   0  17  -6    1.80    1.40
   0  17   6   -0.60    1.00
   0  17  -6    3.20    1.50
  -1  17  -6  150.38    6.80
  -1  17  -6  134.59    7.00
   1  17   6  137.39    6.10
  -2  17  -6    6.80    2.00
   2  17   6    6.80    1.70
  -2  17  -6    6.30    1.90
  -3  17  -6   11.60    2.20
   3  17   6   12.50    2.20
  -3  17  -6   16.20    2.90
  -4  17  -6    8.20    2.30
  -4  17  -6    7.30    1.90
   4  17   6    5.10    1.70
   5  17   6   18.20    2.70
  -5  17  -6   21.90    2.90
  -5  17  -6   17.40    3.00
  -6 -17  -6    3.70    1.70
  -6  17  -6    4.70    1.70
   6  17   6    1.80    1.60
  -6 -18   6    0.30    1.60
   6  18  -6    1.20    1.60
  -5 -18   6    5.00    2.00
  -5  18   6    0.20    0.80
   5  18  -6    1.00    1.60
  -4 -18   6    3.00    1.60
  -4  18   6    2.70    1.10
   4  18  -6    5.50    1.80
  -3 -18   6    1.90    1.40
   3  18  -6    2.60    1.70
  -3  18   6    1.50    1.10
  -2 -18   6   57.59    3.90
   2  18  -6   51.39    4.40
   2  18  -6   54.19    4.10
  -2  18   6   52.89    3.30
   1  18  -6    0.00    1.30
   1  18  -6   -0.40    1.50
  -1  18   6   -0.20    1.00
   0  18  -6  115.19    6.00
   0  18   6  111.39    5.30
   0  18  -6  108.79    6.30
   1  18   6    4.80    1.50
  -1  18  -6    4.10    1.70
  -1  18  -6    0.30    1.50
  -2  18  -6    1.00    1.40
   2  18   6    0.30    1.20
  -2  18  -6   -0.30    1.20
  -3  18  -6   58.79    4.60
   3  18   6   57.19    4.10
  -3  18  -6   58.89    4.20
   4  18   6   22.10    2.90
  -4  18  -6   16.30    3.00
  -4  18  -6   23.60    3.10
  -5  18  -6    9.50    2.20
   5  18   6   11.80    2.40
   6  18   6    7.90    2.20
  -6  18  -6    5.50    1.80
  -5 -19   6   53.39    5.00
  -5 -19   6   51.59    4.30
   5  19  -6   46.40    4.10
  -5  19   6   49.70    3.10
  -4 -19   6   26.30    3.30
  -4  19   6   26.40    2.60
   4  19  -6   25.60    3.40
  -3 -19   6   46.30    3.80
  -3  19   6   44.10    3.10
   3  19  -6   50.39    4.20
   2  19  -6   18.40    2.80
  -2  19   6   17.80    2.30
   1  19  -6    0.30    1.40
  -1  19   6    2.50    1.40
   0  19   6    8.30    1.90
   0  19  -6    2.60    1.60
  -1  19  -6   56.39    4.30
   1  19   6   51.19    3.70
  -2  19  -6    0.30    1.30
   2  19   6    0.10    1.10
   3  19   6   18.50    2.70
  -3  19  -6   18.80    2.90
   4  19   6    4.30    1.70
  -4  19  -6    1.10    1.50
   5  19   6    4.40    1.90
  -5  19  -6    5.20    1.80
   4  20  -6   -0.80    1.50
  -4  20   6    3.30    1.30
  -3  20   6    8.60    1.70
   3  20  -6   10.10    2.40
  -2  20   6   46.60    3.40
   2  20  -6   44.40    4.30
   1  20  -6    2.70    1.70
  -1  20   6    4.30    1.60
   0  20   6   19.20    2.60
   0  20  -6   23.10    3.20
  -1  20  -6   -0.60    1.20
   1  20   6   -0.20    1.20
   2  20   6   16.70    2.70
  -2  20  -6   16.30    2.90
   3  20   6   29.90    3.40
  -3  20  -6   35.60    3.90
  -4  20  -6   11.10    2.40
   4  20   6   11.90    2.40
  -3  21   6   28.80    3.00
   3  21  -6   24.80    3.50
   2  21  -6    5.60    2.10
  -2  21   6    6.70    1.70
  -1  21   6   21.70    2.80
   1  21  -6   28.50    3.70
   0  21   6    2.10    1.50
   0  21  -6    3.60    1.80
   1  21   6    7.50    1.90
  -1  21  -6    6.90    2.20
  -2  21  -6    4.50    2.00
   2  21   6    6.60    1.90
 -10   0   7    1.30    1.30
  -9   0   7   29.90    2.90
  -8   0   7   -0.30    0.90
  -7   0   7  202.08    7.50
  -6   0   7    1.30    0.80
  -5   0   7   40.20    2.50
  -4   0   7   -0.40    0.60
   4   0  -7    0.30    0.40
   3   0  -7   92.69    3.10
  -3   0   7   94.49    3.80
   3   0  -7   92.49    3.40
   2   0  -7    0.10    0.40
  -2   0   7   -0.10    0.60
  -1   0   7  322.27   10.20
   1   0  -7  339.67   10.00
   0   0  -7    0.10    0.30
   0   0   7    0.30    0.50
  -1   0  -7  501.15   15.00
   1   0   7  516.95   15.10
  -2   0  -7    0.20    0.60
   2   0   7   -0.10    0.60
  -3   0  -7  194.58    6.90
   3   0   7  198.38    6.90
  -4   0  -7   -0.40    0.60
   4   0   7   -0.80    0.60
  -5   0  -7    1.00    0.80
   5   0   7    1.10    0.90
   6   0   7    0.80    0.90
  -6   0  -7    1.00    0.90
   7   0   7   27.00    2.80
  -7   0  -7   24.90    2.70
  -8   0  -7   -0.30    1.00
  -9   0  -7   -1.30    1.00
 -10   0  -7    0.10    1.30
 -10  -1   7   55.89    3.90
 -10   1   7   53.89    3.70
  -9  -1   7    3.20    1.40
  -9   1   7    2.70    1.20
  -8  -1   7   10.50    1.80
  -8   1   7    8.50    1.60
  -7  -1   7  115.09    5.20
  -7   1   7  115.79    4.90
  -6  -1   7   32.60    2.50
  -6   1   7   30.30    2.20
  -5  -1   7   39.50    2.60
  -5   1   7   39.50    2.40
  -5   1   7   36.80    2.10
   4  -1  -7  571.44   15.90
  -4  -1   7  554.04   17.00
  -4   1   7  584.64   16.90
  -4   1   7  595.04   16.80
   4   1  -7  582.54   16.30
   4   1  -7  559.04   15.80
   3  -1  -7   24.80    0.90
  -3  -1   7   28.00    1.90
   3   1  -7   21.30    1.50
   3   1  -7   23.40    1.30
  -3   1   7   25.50    1.70
   2  -1  -7  628.64   17.40
  -2  -1   7  626.94   18.20
   2   1  -7  630.94   17.70
  -2   1   7  603.34   17.80
   1  -1  -7 1032.40   29.30
  -1  -1   7 1057.69   29.90
  -1   1   7 1072.39   29.60
   1   1  -7 1084.39   29.60
   0   1  -7   93.69    3.70
   1  -1   7  164.78    6.00
  -1  -1  -7  168.88    5.80
  -1   1  -7  165.08    5.90
   1   1   7  170.28    5.90
   2  -1   7  657.93   19.70
  -2  -1  -7  675.63   19.60
  -2   1  -7  683.23   19.70
   2   1   7  689.83   19.60
  -3  -1  -7   58.59    3.00
   3  -1   7   60.09    3.10
  -3   1  -7   53.69    2.90
   3   1   7   59.49    3.00
  -4  -1  -7    0.20    0.80
   4  -1   7   -0.80    0.60
  -4   1  -7    1.10    0.80
   4   1   7    0.50    0.80
   5  -1   7   92.29    4.20
  -5  -1  -7   91.69    4.30
   5   1   7   94.89    4.20
  -6  -1  -7    7.00    1.50
   6  -1   7    7.20    1.40
  -6   1  -7    6.20    1.40
   6   1   7    8.40    1.50
  -7  -1  -7   -0.40    0.90
   7   1   7    0.70    1.00
  -7   1  -7   -0.60    0.90
  -8  -1  -7   27.30    2.90
  -8   1  -7   31.30    3.00
  -9  -1  -7    2.50    1.40
  -9   1  -7    0.80    1.30
 -10  -1  -7   71.69    4.70
 -10   1  -7   69.19    4.60
 -10  -2   7    0.80    1.30
 -10   2   7    0.30    1.10
  -9  -2   7   20.50    2.60
  -9   2   7   21.90    2.40
  -8  -2   7    1.30    1.10
  -8   2   7    1.90    1.10
  -7  -2   7  234.48    8.70
  -7   2   7  235.18    8.10
  -6  -2   7  163.18    6.50
  -6   2   7  161.88    5.80
  -5  -2   7   54.59    3.20
  -5   2   7   52.49    2.40
  -5   2   7   53.39    2.70
   5   2  -7   54.69    1.80
  -4  -2   7    1.90    0.90
   4  -2  -7    0.30    0.30
   4   2  -7    0.40    0.60
  -4   2   7    0.70    0.50
   4   2  -7    1.60    0.50
  -4   2   7    0.20    0.50
  -3  -2   7   74.29    3.50
   3   2  -7   71.69    2.90
  -3   2   7   71.79    3.00
  -3   2   7   76.19    3.00
  -2  -2   7  246.58    8.30
   2  -2  -7  249.97    7.20
   2   2  -7  250.67    7.80
  -2   2   7  237.28    7.70
   1  -2  -7  511.75   14.40
  -1   2   7  496.35   14.60
   0  -2   7  109.09    4.40
   0  -2  -7  110.99    4.10
   0   2   7  106.99    4.10
   0   2  -7  107.09    4.20
   1  -2   7    2.10    0.80
  -1  -2  -7    3.20    0.80
  -1   2  -7    4.30    1.00
   1   2   7    3.00    0.80
   2  -2   7  261.17    8.70
  -2  -2  -7  257.07    8.50
   2   2   7  269.07    8.50
  -2   2  -7  263.77    8.70
  -3  -2  -7  260.07    8.70
   3  -2   7  263.97    8.80
  -3   2  -7  259.47    8.70
   3   2   7  267.77    8.70
  -4  -2  -7    0.50    0.70
   4  -2   7    0.40    0.70
   4   2   7    0.80    0.70
  -4   2  -7   -0.10    0.30
   5  -2   7  139.29    5.50
  -5  -2  -7  133.99    5.60
   5   2   7  141.09    5.50
  -6  -2  -7   53.39    3.40
  -6   2  -7   57.19    3.40
   6   2   7   60.09    3.30
  -7  -2  -7   92.39    4.70
  -7   2  -7   94.69    4.70
   7   2   7   85.79    4.30
  -8  -2  -7    1.20    1.30
  -8   2  -7    0.00    1.10
  -9  -2  -7    7.80    1.90
  -9   2  -7   14.00    2.30
 -10  -2  -7    1.40    1.60
 -10   2  -7   -0.30    1.30
 -10  -3   7    3.30    1.60
 -10   3   7    3.00    1.30
  -9  -3   7   81.59    4.70
  -9   3   7   71.09    3.80
  -8  -3   7   78.79    4.60
  -8   3   7   86.59    3.90
  -7  -3   7   49.60    3.40
  -7   3   7   45.80    2.70
  -6  -3   7   -0.60    0.90
  -6   3   7    0.00    0.60
  -5  -3   7   14.40    1.90
  -5   3   7    9.70    1.10
   5   3  -7   11.50    1.00
  -5   3   7   10.30    1.20
  -4  -3   7  498.55   15.50
   4   3  -7  500.75   14.40
  -4   3   7  494.05   14.40
  -4   3   7  511.65   14.40
  -3  -3   7   19.90    2.00
  -3   3   7   22.00    1.40
   3   3  -7   23.70    1.60
   3   3  -7   26.10    1.70
  -3   3   7   25.60    1.50
   2  -3  -7   10.00    0.60
  -2  -3   7    9.60    1.50
  -2   3   7   10.60    1.10
   2   3  -7   10.20    1.30
   2   3  -7   13.90    1.50
   1  -3  -7   60.99    2.50
  -1  -3   7   57.89    3.10
  -1   3   7   61.09    2.70
   1   3  -7   61.29    2.90
   0  -3   7  455.45   13.70
   0  -3  -7  450.35   13.10
   0   3   7  445.26   13.10
   0   3  -7  430.46   13.40
   1  -3   7  115.09    4.80
  -1   3  -7  123.69    4.80
   1   3   7  131.29    4.70
  -2  -3  -7   83.89    3.70
   2  -3   7   86.49    3.90
  -2   3  -7   90.29    3.90
   2   3   7   95.09    3.80
   3  -3   7   10.10    1.50
  -3  -3  -7    7.10    1.20
  -3   3  -7    9.60    1.40
   3   3   7   11.50    1.50
  -4  -3  -7  199.78    7.20
   4  -3   7  210.38    7.30
   4   3   7  196.98    7.10
  -5  -3  -7   95.39    4.40
   5   3   7   91.99    4.20
  -6  -3  -7   18.60    2.30
   6  -3   7   20.70    2.10
   6   3   7   19.70    2.10
  -6   3  -7   19.80    2.20
  -7  -3  -7    0.40    1.10
  -7   3  -7    1.90    1.20
   7   3   7    1.50    1.10
  -8  -3  -7   87.69    5.00
  -8   3  -7   96.59    4.90
  -9  -3  -7    1.50    1.40
  -9   3  -7    1.30    1.30
 -10  -3  -7   10.30    2.40
 -10   3  -7    7.70    2.00
 -10  -4   7    1.90    1.50
 -10   4   7    1.90    1.10
  -9  -4   7   54.79    4.00
  -9   4   7   50.09    3.10
  -8  -4   7    1.30    1.20
  -8   4   7    1.80    0.90
  -7  -4   7  158.78    6.90
  -7   4   7  162.58    5.70
  -6  -4   7   16.50    2.20
  -6   4   7   19.30    1.50
  -5  -4   7   24.20    2.50
  -5   4   7   31.50    1.70
   5   4  -7   31.10    1.70
  -5   4   7   30.20    1.60
  -4  -4   7   35.50    2.70
   4   4  -7   37.10    2.20
  -4   4   7   37.90    1.80
  -4   4   7   36.30    1.80
   4   4  -7   39.40    2.10
  -3  -4   7   22.10    2.30
   3   4  -7   28.20    1.90
  -3   4   7   27.90    1.60
   3   4  -7   28.30    1.80
  -3   4   7   28.10    1.50
  -2  -4   7   21.70    1.90
  -2   4   7   26.60    1.60
  -2   4   7   29.10    1.60
   2   4  -7   25.30    1.90
   2   4  -7   18.40    1.60
   1  -4  -7  416.16   11.60
  -1  -4   7  397.86   12.70
   1   4  -7  386.36   12.30
  -1   4   7  411.56   11.90
   0  -4   7   58.79    3.10
   0  -4  -7   54.69    2.50
   0   4  -7   57.39    2.90
   0   4   7   53.59    2.60
   1  -4   7  222.98    7.80
  -1   4  -7  225.08    7.70
   2  -4   7   11.30    1.60
  -2  -4  -7    9.10    1.20
  -2   4  -7    5.60    1.20
   2   4   7    8.80    1.20
  -3  -4  -7  650.23   19.10
   3  -4   7  632.94   19.20
  -3   4  -7  650.63   19.20
   3   4   7  664.73   19.10
  -4  -4  -7    5.10    1.20
   4  -4   7    4.30    1.10
   4   4   7    4.60    1.10
   5  -4   7   99.39    4.50
  -5  -4  -7  117.09    5.10
   5   4   7  116.69    4.90
  -5   4  -7  118.19    4.90
   6  -4   7    6.10    1.30
  -6  -4  -7    7.50    1.60
   6   4   7    8.20    1.50
  -6   4  -7   10.00    1.70
  -7  -4  -7  149.49    6.60
   7   4   7  149.49    6.20
  -7   4  -7  156.28    6.40
  -8  -4  -7    0.60    1.20
  -8   4  -7    1.60    1.30
  -9  -4  -7   11.70    2.30
  -9   4  -7   12.50    2.20
 -10  -4  -7    0.50    1.50
 -10   4  -7    0.90    1.40
 -10  -5   7    0.20    1.40
  -9  -5   7   37.70    3.70
  -9   5   7   34.60    2.50
  -8  -5   7   41.40    3.50
  -8   5   7   41.00    2.40
  -7  -5   7   15.70    2.40
  -7   5   7   14.40    1.40
  -6  -5   7  222.18    8.40
  -6   5   7  209.58    6.60
  -5  -5   7    7.10    1.60
  -5   5   7    9.20    0.90
   5   5  -7    9.50    1.20
  -5   5   7    8.90    0.90
  -4  -5   7    0.10    0.40
   4   5  -7    2.30    0.70
  -4   5   7    2.10    0.50
   4   5  -7    1.40    0.80
  -4   5   7    2.70    0.60
  -3  -5   7    0.00    0.20
   3   5  -7    1.50    0.70
   3   5  -7    1.00    0.70
  -3   5   7    1.00    0.50
  -3   5   7    1.70    0.50
  -2  -5   7 1033.70   29.70
   2   5  -7 1026.50   29.10
  -2   5   7 1036.50   28.40
   2   5  -7 1011.10   29.30
  -2   5   7 1045.10   28.50
  -1  -5   7    8.70    1.50
   1  -5  -7    7.10    0.80
  -1   5   7    7.20    1.00
   1   5  -7    4.70    1.10
   0  -5   7  352.76   11.40
   0  -5  -7  358.16   10.50
   0   5   7  340.17   10.60
   0   5  -7  352.66   11.10
   1  -5   7    3.80    1.10
  -1   5  -7    3.00    0.90
  -2  -5  -7  311.37   10.00
   2  -5   7  322.47   10.40
   2   5   7  315.17   10.00
  -2   5  -7  319.27   10.30
   3  -5   7   18.50    2.00
  -3  -5  -7   24.00    1.90
   3   5   7   22.80    1.90
  -5  -5  -7   34.40    2.60
   5  -5   7   34.10    2.40
   5   5   7   34.00    2.50
  -5   5  -7   38.60    2.70
  -6  -5  -7   47.30    3.30
   6   5   7   50.39    3.10
  -6   5  -7   50.29    3.20
  -7  -5  -7   12.70    2.20
  -7   5  -7    8.80    1.70
   7   5   7    8.90    1.60
  -8  -5  -7  171.48    7.40
  -8   5  -7  159.48    6.90
  -9  -5  -7    7.20    2.00
  -9   5  -7    8.20    1.80
 -10  -5  -7   -2.30    1.20
 -10   5  -7   -1.70    1.10
 -10  -6   7    0.50    1.50
  -9  -6   7   41.10    4.10
  -8  -6   7    1.40    1.30
  -8   6   7   -0.30    0.60
  -7  -6   7   38.10    3.30
  -7   6   7   40.80    2.00
  -6  -6   7   17.70    2.50
  -6   6   7   17.90    1.20
  -5  -6   7   73.09    4.30
  -5   6   7   80.19    2.80
   5   6  -7   83.89    3.50
  -4  -6   7    0.00    0.30
  -4   6   7    1.00    0.40
   4   6  -7    1.20    0.70
   4   6  -7   -0.80    0.60
  -4   6   7    0.50    0.40
   3   6  -7   83.69    3.80
  -3   6   7   86.39    3.10
   3   6  -7   84.29    3.90
  -3   6   7   84.69    3.10
  -2  -6   7   81.59    4.00
  -2   6   7   77.39    3.00
   2   6  -7   79.29    3.80
   2   6  -7   73.29    3.50
  -2   6   7   75.49    3.00
  -1  -6   7  659.73   19.60
   1  -6  -7  646.74   17.90
   1   6  -7  646.64   19.40
  -1   6   7  644.44   18.50
   1   6  -7  661.83   19.20
   0  -6  -7  502.85   14.40
   0  -6   7  493.05   15.50
   0   6   7  502.75   14.70
   0   6  -7  509.65   15.30
   1  -6   7    1.30    0.90
  -1  -6  -7    1.20    0.60
  -1   6  -7    2.20    0.90
   1   6   7    1.00    0.70
  -2  -6  -7   31.40    2.00
   2  -6   7   28.30    2.20
   2   6   7   26.80    2.00
  -2   6  -7   28.20    2.20
   3  -6   7  573.14   17.10
  -3  -6  -7  556.84   16.90
   3   6   7  571.14   16.90
   4  -6   7   28.50    2.10
  -4  -6  -7   36.40    2.50
   4   6   7   34.60    2.40
   5  -6   7  132.69    5.00
  -5  -6  -7  119.29    5.40
  -5   6  -7  116.79    5.20
   5   6   7  129.19    5.30
  -6  -6  -7   56.99    3.60
   6   6   7   48.10    3.20
  -6   6  -7   46.90    3.20
  -7  -6  -7  170.68    7.30
  -7   6  -7  168.48    6.90
   7   6   7  170.08    6.80
  -8  -6  -7    9.80    2.10
  -8   6  -7   10.80    2.00
  -9  -6  -7    5.80    1.90
  -9   6  -7    5.60    1.70
 -10  -6  -7    3.70    1.80
 -10   6  -7    5.20    1.80
 -10  -7   7    0.70    1.50
  -9  -7   7    0.40    1.40
  -8  -7   7   56.79    4.20
  -7  -7   7   72.49    4.60
  -7   7   7   71.79    2.70
  -6  -7   7   87.49    4.90
  -6   7   7   82.89    2.80
  -5  -7   7    1.10    1.10
   5   7  -7    0.50    0.70
  -5   7   7    0.00    0.40
   4  -7  -7  206.28    5.90
   4   7  -7  210.08    7.20
  -4   7   7  197.78    6.20
   4   7  -7  203.28    7.40
  -4   7   7  195.58    6.10
  -3  -7   7    1.40    1.10
  -3   7   7    0.80    0.50
   3   7  -7    2.20    0.90
  -3   7   7    1.20    0.50
   3   7  -7    0.00    0.70
  -2  -7   7   83.49    4.20
   2   7  -7   84.49    3.90
  -2   7   7   80.69    3.20
  -2   7   7   83.19    3.20
   2   7  -7   84.39    4.10
  -1  -7   7   22.20    2.40
   1  -7  -7   18.80    0.90
   1   7  -7   23.50    2.30
  -1   7   7   17.60    1.40
   1   7  -7   22.10    2.30
   0  -7  -7    3.20    0.70
   0  -7   7    2.30    0.90
   0   7   7    1.40    0.70
   0   7  -7    1.90    0.90
   0   7  -7    3.30    1.10
  -1  -7  -7   35.30    2.00
   1  -7   7   30.90    2.40
  -1   7  -7   36.50    2.50
   1   7   7   30.60    2.00
   2  -7   7  411.16   13.40
  -2  -7  -7  422.56   13.00
   2   7   7  448.16   13.10
   3  -7   7   47.40    2.80
   4  -7   7  123.89    4.90
  -4  -7  -7  115.79    5.10
  -4   7  -7  124.99    5.20
   4   7   7  117.89    5.10
  -5  -7  -7   -0.20    1.00
   5  -7   7    0.10    0.70
   5   7   7    0.00    0.90
  -5   7  -7   -0.40    0.80
  -6  -7  -7   34.60    3.10
   6   7   7   46.50    3.10
  -6   7  -7   44.90    3.10
  -7  -7  -7    7.90    1.90
  -7   7  -7    9.70    1.80
   7   7   7    7.90    1.60
  -8  -7  -7   76.99    4.80
   8   7   7   75.79    4.50
  -8   7  -7   76.19    4.40
  -9  -7  -7    0.00    1.40
  -9   7  -7    1.30    1.30
 -10  -8   7   -0.60    1.50
  -9  -8   7   15.20    2.70
  -8  -8   7   -0.80    1.20
  -7  -8   7   33.40    3.60
  -7   8   7   34.90    1.60
  -6  -8   7   14.30    2.30
   6   8  -7   16.40    1.90
  -6   8   7   18.10    1.00
  -5  -8   7  277.17   10.30
  -5   8   7  278.37    8.00
   5   8  -7  277.27    9.30
   4  -8  -7    1.00    0.40
  -4  -8   7    1.50    1.20
  -4   8   7    2.00    0.60
   4   8  -7    1.00    0.90
   4   8  -7    2.60    1.10
  -4   8   7    2.00    0.50
   3  -8  -7   15.10    1.20
  -3  -8   7   13.90    2.10
  -3   8   7   13.10    1.20
   3   8  -7   17.20    2.00
   3   8  -7   14.60    1.90
  -3   8   7   14.10    1.20
  -2  -8   7   15.90    2.20
  -2   8   7   11.00    1.20
   2   8  -7   11.60    1.60
  -2   8   7   18.70    1.30
   2   8  -7   17.70    2.20
  -1  -8   7  136.49    5.80
  -1   8   7  139.59    4.80
   1   8  -7  131.49    5.70
   1   8  -7  131.79    5.40
   0  -8   7    0.50    0.90
   0  -8  -7    1.20    0.50
   0   8  -7   -0.50    0.70
   0   8  -7    1.40    0.90
   0   8   7    1.00    0.70
  -1  -8  -7   20.50    1.60
   1  -8   7   24.60    2.40
  -1   8  -7   17.30    1.90
   1   8   7   12.90    1.50
   4  -8   7    9.40    1.40
  -4  -8  -7   12.90    1.80
   4   8   7   11.10    1.70
  -4   8  -7   11.40    1.80
  -5  -8  -7   65.59    3.80
   5   8   7   59.99    3.50
  -5   8  -7   61.29    3.60
  -6  -8  -7   15.90    2.30
  -6   8  -7   16.70    2.30
   6   8   7   18.00    2.30
  -7  -8  -7   19.30    2.60
  -7   8  -7   17.00    2.30
   7   8   7   18.30    2.40
  -8  -8  -7    6.00    1.90
  -8   8  -7    6.10    1.60
   8   8   7    5.30    1.50
  -9  -8  -7   27.60    3.50
  -9   8  -7   29.40    3.20
  -9  -9   7   -1.70    1.30
  -8  -9   7   37.50    3.80
  -7  -9   7   48.90    3.90
  -6  -9   7   -1.30    1.10
  -6   9   7    0.30    0.30
   6   9  -7   -0.90    0.80
  -5  -9   7  178.88    7.70
  -5   9   7  182.88    5.50
   5   9  -7  184.58    6.80
   4  -9  -7  248.38    7.60
  -4  -9   7  247.98    9.50
   4   9  -7  260.87    9.20
  -4   9   7  258.57    7.60
   4   9  -7  259.37    8.90
  -3  -9   7   98.79    5.00
   3  -9  -7   93.89    3.60
   3   9  -7   96.39    4.70
  -3   9   7   95.49    3.50
   3   9  -7   87.39    4.30
  -2  -9   7  289.87   10.20
  -2   9   7  281.47    8.70
   2   9  -7  290.87    9.80
  -2   9   7  272.37    8.80
   2   9  -7  302.17   10.20
  -1  -9   7    2.20    1.10
   1   9  -7    3.50    1.30
  -1   9   7    0.90    0.70
   1   9  -7    2.50    1.10
   0  -9   7  305.17   10.50
   0  -9  -7  310.27    9.10
   0   9   7  311.47    9.70
   0   9  -7  291.97   10.50
   0   9  -7  306.57   10.30
  -1  -9  -7   34.20    2.00
   1  -9   7   38.50    2.70
  -1   9  -7   38.10    2.70
   1   9   7   36.50    2.30
  -2  -9  -7   -0.30    0.60
   2  -9   7    0.10    0.80
   2   9   7   -0.10    0.20
  -2   9  -7   -0.20    0.20
  -3  -9  -7    6.40    1.30
  -3   9  -7    6.20    1.50
   3   9   7    5.00    1.30
  -4  -9  -7    0.00    1.00
   4  -9   7    0.50    0.70
  -4   9  -7    0.60    0.90
   4   9   7    0.60    0.90
  -5  -9  -7   11.00    1.90
   5   9   7   15.60    2.00
  -5   9  -7   15.80    2.10
  -6  -9  -7    7.40    1.80
  -6   9  -7    8.40    1.80
   6   9   7    8.00    1.70
  -7  -9  -7   28.90    3.30
  -7   9  -7   22.60    2.70
   7   9   7   24.10    2.70
  -8  -9  -7   43.60    4.20
  -8   9  -7   46.90    3.50
   8   9   7   37.60    3.20
  -9  -9  -7    5.60    2.00
  -9   9  -7    4.50    1.60
  -9 -10   7    6.60    2.20
  -8 -10   7   -1.10    1.30
  -7 -10   7   23.00    3.10
  -6 -10   7   10.80    2.20
   6  10  -7   15.00    2.00
  -6  10   7   12.40    0.80
  -5 -10   7  184.08    8.10
  -5  10   7  195.18    5.90
   5  10  -7  203.08    7.40
  -4 -10   7   72.49    4.50
   4  10  -7   79.29    4.00
   4  10  -7   85.49    4.50
  -4  10   7   78.89    3.00
  -3 -10   7  123.19    5.90
   3 -10  -7  122.89    4.60
   3  10  -7  124.79    5.40
  -3  10   7  127.39    4.40
   3  10  -7  126.89    5.70
  -2 -10   7   51.19    3.50
   2 -10  -7   52.39    2.80
   2  10  -7   49.80    3.20
  -2  10   7   51.09    2.50
   2  10  -7   50.29    3.40
  -1 -10   7    6.00    1.60
   1  10  -7    5.40    1.40
   1  10  -7    6.50    1.40
  -1  10   7    4.90    1.00
   0 -10   7   39.20    2.90
   0 -10  -7   37.50    1.90
   0  10   7   41.40    2.40
   0  10  -7   41.90    3.10
   0  10  -7   42.20    2.90
  -1 -10  -7   25.70    1.80
   1 -10   7   24.60    2.50
   1  10   7   28.10    2.10
  -1  10  -7   30.70    2.50
  -2 -10  -7   42.40    2.40
   2 -10   7   38.80    2.60
   2  10   7   33.10    2.40
  -2  10  -7   41.20    3.10
  -2  10  -7   34.00    2.60
  -3 -10  -7    1.60    0.90
   3 -10   7    1.20    0.80
  -3  10  -7   -0.50    0.80
   3  10   7    1.20    1.00
  -4 -10  -7    2.10    1.10
   4  10   7    2.90    1.20
  -4  10  -7    1.00    1.00
  -5 -10  -7  129.59    5.90
   5  10   7  127.49    5.70
  -5  10  -7  136.79    5.90
  -6 -10  -7    3.50    1.50
  -6  10  -7    5.30    1.50
   6  10   7    6.50    1.70
  -7 -10  -7   15.00    2.60
  -7  10  -7   18.30    2.40
   7  10   7   17.60    2.40
  -8 -10  -7   -2.00    1.30
  -8  10  -7    0.40    1.20
   8  10   7   -1.70    1.10
  -9 -10  -7   20.20    3.10
  -9  10  -7   18.00    2.70
  -9 -11   7   -0.50    1.40
  -8 -11   7   24.90    3.40
  -7 -11   7    4.10    1.80
  -6 -11   7   21.30    3.00
   6  11  -7   18.40    2.30
  -5 -11   7   19.00    2.60
   5  11  -7   19.20    2.40
  -5  11   7   18.20    1.20
  -4 -11   7  212.58    8.60
   4  11  -7  220.28    8.10
   4  11  -7  206.58    8.30
  -4  11   7  210.58    6.60
  -3 -11   7  137.19    6.40
   3 -11  -7  140.69    5.20
   3  11  -7  143.39    6.00
   3  11  -7  140.39    6.30
  -3  11   7  139.59    4.90
   2 -11  -7   26.70    2.10
  -2 -11   7   26.90    2.80
  -2  11   7   27.30    1.90
   2  11  -7   29.80    2.50
   2  11  -7   24.40    2.80
  -1 -11   7    9.40    1.70
  -1  11   7    8.60    1.30
   1  11  -7    7.90    1.70
   1  11  -7    9.80    1.80
   0 -11   7   17.40    2.20
   0 -11  -7   15.70    1.20
   0  11  -7   20.20    2.40
   0  11   7   20.00    2.00
   0  11  -7   19.30    2.50
  -1 -11  -7   -0.10    0.60
   1 -11   7    0.50    0.90
  -1  11  -7   -0.20    0.80
  -1  11  -7   -0.20    0.80
   1  11   7   -0.70    0.80
   2 -11   7    4.30    1.20
  -2 -11  -7    1.40    0.90
   2  11   7    3.10    1.10
  -2  11  -7    2.10    1.10
  -2  11  -7    2.40    1.30
   3 -11   7    4.60    1.10
  -3 -11  -7    6.60    1.40
  -3  11  -7    4.10    1.60
   3  11   7    6.20    1.40
  -3  11  -7    4.90    1.40
  -4 -11  -7  129.59    5.60
  -4  11  -7  126.09    5.80
   4  11   7  135.49    5.70
  -5 -11  -7    1.00    1.20
   5  11   7    2.60    1.30
  -5  11  -7    0.50    1.10
  -6 -11  -7   33.80    3.30
   6  11   7   40.30    3.30
  -6  11  -7   37.60    3.10
  -7 -11  -7    0.40    1.50
  -7  11  -7   -0.70    1.10
   7  11   7   -1.10    1.10
  -8 -11  -7   27.10    3.40
   8  11   7   19.60    2.70
  -8  11  -7   21.50    2.80
  -8 -12   7    4.50    2.00
  -7 -12   7   45.70    4.50
  -6 -12   7   18.90    2.90
   6  12  -7   17.00    2.30
  -5 -12   7  156.08    7.20
   5  12  -7  163.68    6.60
  -5  12   7  147.39    4.90
  -4 -12   7    6.00    1.80
   4  12  -7    4.20    1.40
  -4  12   7    4.10    0.80
   4  12  -7    4.90    1.70
  -3 -12   7    8.00    1.80
   3 -12  -7    7.80    1.30
   3  12  -7    4.50    1.70
  -3  12   7    8.30    1.20
   3  12  -7    5.20    1.50
   2 -12  -7   59.29    3.20
  -2 -12   7   62.09    4.00
  -2  12   7   63.09    3.00
   2  12  -7   62.09    3.90
   2  12  -7   63.19    3.80
  -1 -12   7    3.10    1.30
  -1  12   7    2.40    0.90
   1  12  -7    2.50    1.20
   1  12  -7    5.60    1.60
   0 -12   7  129.29    5.60
   0  12  -7  125.79    5.70
   0  12   7  119.49    5.00
   0  12  -7  126.79    6.10
  -1 -12  -7   43.80    2.40
   1 -12   7   44.60    3.00
  -1  12  -7   46.90    3.30
  -1  12  -7   46.30    3.50
   1  12   7   48.10    2.90
  -2 -12  -7   17.70    1.90
   2 -12   7   15.80    2.00
  -2  12  -7   22.50    2.60
   2  12   7   17.60    2.10
  -2  12  -7   21.20    2.80
  -3 -12  -7   39.30    2.70
  -3  12  -7   40.50    3.40
   3  12   7   38.60    2.90
  -3  12  -7   37.20    3.10
  -4 -12  -7   -0.30    0.90
   4  12   7    1.80    1.20
  -4  12  -7    0.20    1.10
  -4  12  -7    1.20    1.20
  -5 -12  -7  137.39    6.20
  -5  12  -7  136.89    6.20
   5  12   7  134.39    6.10
  -5  12  -7  134.49    6.80
  -6 -12  -7    6.10    1.80
  -6  12  -7    5.80    1.60
   6  12   7    8.00    1.80
  -7 -12  -7   27.30    3.20
   7  12   7   30.60    3.20
  -7  12  -7   29.50    3.20
  -8 -12  -7    3.70    1.80
   8  12   7    3.00    1.60
  -8  12  -7    3.30    1.50
  -8 -13   7   32.70    4.00
  -7 -13   7    7.10    2.20
  -6 -13   7    3.10    1.70
   6  13  -7    1.10    1.10
  -5 -13   7    4.10    1.70
   5  13  -7    5.20    1.50
  -5  13   7    7.40    1.00
  -4 -13   7   85.29    5.10
   4  13  -7   98.09    5.20
   4  13  -7   95.69    4.90
  -4  13   7   94.59    3.70
  -3 -13   7   -0.10    1.20
  -3  13   7    0.30    0.70
   3  13  -7    0.60    1.10
   3  13  -7    1.70    1.40
  -2 -13   7   63.89    4.10
   2  13  -7   62.79    4.20
  -2  13   7   69.49    3.20
   2  13  -7   66.29    4.00
  -1 -13   7   19.10    2.40
   1  13  -7   18.70    2.50
   1  13  -7   24.20    3.00
  -1  13   7   16.20    1.90
   0 -13   7  450.75   14.80
   0  13  -7  476.55   15.70
   0  13  -7  464.85   15.10
   0  13   7  450.95   14.20
   1 -13   7   19.60    2.20
  -1  13  -7   21.70    2.70
   1  13   7   16.10    2.00
  -1  13  -7   15.40    2.40
   2 -13   7   26.90    2.20
  -2 -13  -7   25.70    2.10
  -2  13  -7   23.20    2.90
  -2  13  -7   24.10    2.80
   2  13   7   23.50    2.60
  -3 -13  -7   -0.60    0.80
   3  13   7   -0.10    0.90
  -3  13  -7    1.30    1.20
  -3  13  -7   -0.20    1.20
  -4 -13  -7   53.89    3.50
  -4  13  -7   56.59    3.70
   4  13   7   50.39    3.50
  -4  13  -7   49.50    4.00
  -5 -13  -7    0.50    1.20
   5  13   7    0.20    1.20
  -5  13  -7    0.40    1.20
  -5  13  -7    1.30    1.20
  -6 -13  -7   35.10    3.40
   6  13   7   35.10    3.40
  -6  13  -7   37.80    3.30
  -6  13  -7   34.00    3.80
  -7 -13  -7   13.80    2.50
   7  13   7   16.20    2.60
  -7  13  -7   13.10    2.30
  -7  13  -7   16.70    2.70
  -8 -13  -7   11.80    2.60
  -8  13  -7   16.00    2.50
   8  13   7   13.80    2.50
  -8 -14   7    4.00    2.10
  -7 -14   7    4.10    1.80
  -6 -14   7    0.60    1.40
   6  14  -7   -0.10    1.10
  -5 -14   7   31.90    3.70
   5  14  -7   31.20    3.20
  -5  14   7   30.80    1.90
  -4 -14   7    1.70    1.50
  -4  14   7    2.70    0.80
   4  14  -7    1.50    1.20
  -3 -14   7   23.70    2.90
   3  14  -7   19.00    2.70
   3  14  -7   18.00    2.50
  -3  14   7   22.80    1.90
  -2 -14   7  161.78    6.80
   2  14  -7  150.48    6.70
  -2  14   7  143.49    5.60
   2  14  -7  142.39    6.90
  -1 -14   7  115.69    5.50
   1  14  -7  112.09    5.60
  -1  14   7  120.29    4.90
   1  14  -7  114.99    6.00
   0 -14   7    7.90    1.60
   0  14   7    5.60    1.40
   0  14  -7    4.40    1.60
   0  14  -7    5.50    1.70
   1 -14   7   73.99    3.90
   1  14   7   76.59    4.00
  -1  14  -7   74.79    4.40
  -1  14  -7   66.19    4.60
   2  14   7    9.50    1.70
  -2  14  -7   13.20    2.20
  -2  14  -7    9.40    2.20
  -3 -14  -7   80.69    4.00
   3  14   7   78.49    4.30
  -3  14  -7   83.79    4.70
  -3  14  -7   80.09    5.00
  -4 -14  -7    2.60    1.30
  -4  14  -7    6.70    1.80
  -4  14  -7    1.50    1.40
   4  14   7    5.00    1.50
  -5 -14  -7   52.89    3.70
   5  14   7   49.30    3.60
  -5  14  -7   51.79    4.20
  -5  14  -7   52.99    3.80
  -6 -14  -7    1.80    1.40
   6  14   7    0.10    1.20
  -6  14  -7    1.60    1.30
  -6  14  -7    2.10    1.50
  -7 -14  -7   25.50    3.30
   7  14   7   22.60    3.00
  -7  14  -7   22.00    3.00
  -7  14  -7   22.10    3.30
  -7 -15   7    3.00    1.90
  -6 -15   7   16.60    2.90
   6  15  -7   22.10    2.80
  -5 -15   7    4.90    1.80
   5  15  -7    3.50    1.40
  -5  15   7    5.20    1.00
  -4 -15   7   47.40    3.90
  -4  15   7   38.90    2.40
   4  15  -7   41.70    3.40
  -3 -15   7   19.60    2.80
  -3  15   7   24.40    2.00
   3  15  -7   22.60    3.00
   3  15  -7   24.10    2.90
  -2 -15   7    0.00    1.30
  -2  15   7    1.30    1.00
   2  15  -7    0.70    1.30
   2  15  -7    1.50    1.40
  -1 -15   7  119.19    5.70
   1  15  -7  123.69    5.90
  -1  15   7  113.49    5.00
   1  15  -7  112.39    6.20
   0 -15   7  181.28    7.20
   0  15  -7  186.48    7.80
   0  15   7  176.18    6.90
   0  15  -7  182.08    8.20
   1 -15   7   -0.50    1.10
  -1  15  -7    0.10    1.20
  -1  15  -7   -0.80    1.10
   1  15   7   -0.70    0.90
   2  15   7   90.69    4.60
  -2  15  -7   83.99    4.90
  -2  15  -7   87.59    5.50
  -3  15  -7    1.10    1.40
   3  15   7    1.70    1.30
  -3  15  -7    0.20    1.20
  -4 -15  -7  122.39    5.60
  -4  15  -7  129.89    6.70
   4  15   7  118.59    5.80
  -4  15  -7  118.19    6.00
  -5 -15  -7   27.50    3.10
   5  15   7   28.10    3.20
  -5  15  -7   29.30    3.70
  -5  15  -7   31.40    3.50
  -6 -15  -7   15.10    2.50
  -6  15  -7   14.40    2.50
  -6  15  -7   15.30    2.80
   6  15   7   14.70    2.60
  -7 -15  -7    1.90    1.70
  -7  15  -7    4.30    1.70
   7  15   7    3.50    1.80
  -7 -16   7   -1.10    1.50
  -6 -16   7    0.70    1.50
   6  16  -7   -1.00    1.10
  -5 -16   7   38.30    4.10
   5  16  -7   41.60    3.50
  -5  16   7   43.00    2.50
  -4 -16   7    1.00    1.50
  -4  16   7    1.80    0.90
   4  16  -7    2.50    1.50
  -3 -16   7    3.50    1.70
   3  16  -7    1.50    1.40
  -3  16   7    2.70    1.00
   3  16  -7    2.00    1.50
  -2 -16   7  151.08    6.80
   2  16  -7  144.19    6.90
   2  16  -7  153.28    7.40
  -2  16   7  144.79    5.80
  -1 -16   7   72.39    4.30
   1  16  -7   76.19    5.00
  -1  16   7   70.99    3.80
   1  16  -7   74.69    4.60
   0 -16   7   47.10    3.40
   0  16  -7   43.60    3.70
   0  16  -7   54.99    4.30
   0  16   7   56.19    3.50
  -1  16  -7   57.39    4.30
   1  16   7   53.99    3.50
  -1  16  -7   52.79    3.90
   2  16   7   13.10    2.10
  -2  16  -7   10.60    2.40
  -2  16  -7   10.60    2.20
  -3  16  -7  150.68    7.00
   3  16   7  147.19    6.60
  -3  16  -7  151.38    7.60
   4  16   7   -0.10    1.20
  -4  16  -7   -0.40    1.10
  -4  16  -7    0.90    1.30
   5  16   7   20.70    2.90
  -5  16  -7   24.00    3.10
  -5  16  -7   22.90    3.40
  -6 -16  -7    6.00    1.90
   6  16   7    4.60    1.80
  -6  16  -7    6.90    1.90
  -6 -17   7   24.10    3.30
   6  17  -7   23.90    3.10
  -5 -17   7    3.80    1.90
   5  17  -7    2.40    1.50
  -5  17   7    3.10    1.00
  -4 -17   7   20.70    3.00
   4  17  -7   19.70    2.90
  -4  17   7   20.50    2.10
  -3 -17   7   -0.10    1.20
   3  17  -7   -0.70    1.20
  -3  17   7    0.50    0.90
   3  17  -7    0.70    1.50
  -2 -17   7   57.19    3.90
   2  17  -7   47.70    4.10
  -2  17   7   57.69    3.40
   2  17  -7   51.49    4.00
  -1 -17   7    0.20    1.20
   1  17  -7    2.40    1.60
  -1  17   7   -1.10    0.90
   1  17  -7   -0.30    1.20
   0  17  -7  101.39    5.70
   0  17   7  106.89    5.10
   0  17  -7  116.09    6.30
  -1  17  -7    0.20    1.30
   1  17   7    1.20    1.20
  -1  17  -7   -0.40    1.30
   2  17   7   45.20    3.40
  -2  17  -7   41.70    4.30
  -2  17  -7   46.30    3.90
  -3  17  -7   -0.50    1.30
   3  17   7    1.40    1.30
  -3  17  -7    0.70    1.40
  -4  17  -7   16.00    2.60
   4  17   7   18.70    2.70
  -4  17  -7   19.50    3.20
  -5  17  -7    2.30    1.50
   5  17   7    1.80    1.60
  -6  17  -7    0.80    1.30
   6  17   7   -1.20    1.20
  -5 -18   7   10.20    2.40
  -5  18   7    6.10    1.30
   5  18  -7    5.60    1.80
  -4 -18   7   52.89    4.30
   4  18  -7   49.70    4.20
  -4  18   7   51.49    3.10
  -3 -18   7   14.50    2.60
  -3  18   7   12.80    1.90
   3  18  -7   12.00    2.50
  -2 -18   7   -0.40    1.30
   2  18  -7    0.50    1.50
  -2  18   7    1.50    1.10
   2  18  -7    0.40    1.40
   1  18  -7   84.99    5.20
  -1  18   7   89.09    4.50
   1  18  -7   84.09    5.60
   0  18  -7    0.60    1.40
   0  18  -7    1.80    1.50
   0  18   7    1.30    1.30
  -1  18  -7   17.30    2.70
   1  18   7   22.30    2.70
  -1  18  -7   23.30    3.50
  -2  18  -7   -0.30    1.20
   2  18   7   -0.70    1.10
  -3  18  -7    5.90    1.90
   3  18   7    8.90    2.00
   4  18   7    1.40    1.40
  -4  18  -7   -0.30    1.30
   5  18   7    5.00    1.90
  -5  18  -7    9.20    2.20
  -4 -19   7   82.19    5.20
   4  19  -7   75.49    5.20
  -4  19   7   73.99    4.00
  -3 -19   7   12.10    2.40
   3  19  -7    7.70    2.20
  -3  19   7   10.00    1.80
   2  19  -7    0.10    1.40
  -2  19   7    1.10    1.20
   1  19  -7   11.50    2.50
  -1  19   7    9.60    1.90
   0  19  -7   20.80    3.10
   0  19   7   18.10    2.50
  -1  19  -7   -0.10    1.30
   1  19   7   -1.30    1.10
   2  19   7    7.40    2.00
  -2  19  -7    8.90    2.30
  -3  19  -7    1.70    1.60
   3  19   7    2.70    1.50
  -4  19  -7    8.20    2.30
   4  19   7   12.40    2.40
  -3  20   7   10.90    1.90
   3  20  -7   11.50    2.60
   2  20  -7   -0.50    1.40
  -2  20   7    0.10    1.20
   1  20  -7    8.00    2.30
  -1  20   7    5.80    1.70
   0  20  -7    4.50    1.90
   0  20   7    3.70    1.60
  -1  20  -7   17.60    2.90
   1  20   7   16.90    2.60
  -2  20  -7    0.00    1.40
   2  20   7   -1.80    1.10
   3  20   7   -1.10    1.10
  -3  20  -7    0.50    1.40
  -2  21   7   33.80    3.40
   2  21  -7   35.60    4.10
   1  21  -7    0.50    1.50
  -1  21   7    0.60    1.30
   0  21  -7   23.70    3.50
   0  21   7   25.30    3.20
  -1  21  -7    9.30    2.50
   1  21   7   10.70    2.30
 -10   0   8    5.60    1.70
  -9   0   8    0.10    1.10
  -8   0   8    3.00    1.30
  -7   0   8    0.40    1.00
  -6   0   8   25.00    2.50
  -5   0   8   -0.70    0.70
   4   0  -8  547.65   15.50
  -4   0   8  541.35   16.40
  -3   0   8   -0.30    0.60
   3   0  -8    0.00    0.30
  -2   0   8  579.64   16.90
   2   0  -8  555.84   16.20
   1   0  -8    1.90    0.70
  -1   0   8    1.20    0.80
   0   0  -8  138.09    5.10
   0   0   8  135.99    5.20
  -1   0  -8    0.10    0.60
   1   0   8    0.70    0.70
   2   0   8  105.79    4.50
  -2   0  -8  109.69    4.50
   3   0   8    0.40    0.70
  -3   0  -8    0.20    0.70
   4   0   8   25.50    2.20
  -4   0  -8   25.80    2.20
   5   0   8    0.50    0.90
  -5   0  -8    0.40    0.90
  -6   0  -8   36.00    2.90
   6   0   8   31.60    2.60
  -7   0  -8   -0.20    1.00
  -8   0  -8  242.98    9.40
  -9   0  -8    1.20    1.30
 -10   0  -8   28.80    3.50
 -10  -1   8    0.30    1.30
 -10   1   8    0.80    1.20
  -9  -1   8    8.10    1.90
  -9   1   8    6.00    1.60
  -8  -1   8    7.80    1.80
  -8   1   8    5.70    1.50
  -7  -1   8   66.99    3.90
  -7   1   8   72.09    3.80
  -6  -1   8   20.40    2.30
  -6   1   8   22.40    2.20
  -5  -1   8    5.10    1.30
  -5   1   8    6.70    1.30
  -4  -1   8   37.80    2.60
   4  -1  -8   36.40    1.80
   4   1  -8   38.40    2.00
  -4   1   8   41.00    2.50
   4   1  -8   37.90    1.60
   3  -1  -8   10.50    0.70
  -3  -1   8   10.60    1.50
  -3   1   8   12.40    1.50
   3   1  -8   11.30    1.10
  -2  -1   8    5.00    1.10
   2  -1  -8    5.40    0.80
   2   1  -8    5.70    0.90
  -2   1   8    3.30    0.90
   1  -1  -8 1099.39   30.50
  -1   1   8 1093.99   30.80
  -1  -1  -8   21.60    1.80
   1  -1   8   24.40    2.00
   1   1   8   25.30    1.90
  -1   1  -8   23.70    1.90
  -2  -1  -8   73.19    3.50
   2  -1   8   75.69    3.70
  -2   1  -8   80.09    3.70
   2   1   8   78.09    3.60
  -3  -1  -8   18.80    1.90
   3  -1   8   17.80    2.00
   3   1   8   17.50    2.00
  -3   1  -8   21.00    2.20
  -4  -1  -8   40.40    2.70
   4  -1   8   42.60    2.80
  -4   1  -8   41.40    2.70
   4   1   8   42.90    2.70
  -5  -1  -8   40.00    2.90
   5  -1   8   41.60    2.90
  -5   1  -8   39.50    2.80
   5   1   8   43.30    2.90
   6  -1   8   13.70    1.90
  -6  -1  -8   17.00    2.30
   6   1   8   14.20    2.00
  -6   1  -8   14.20    2.00
  -7  -1  -8    9.80    1.80
  -7   1  -8   13.60    2.10
   7   1   8   12.60    1.90
  -8  -1  -8    1.60    1.30
  -8   1  -8    1.80    1.30
  -9  -1  -8   43.20    3.50
  -9   1  -8   30.90    3.40
 -10  -1  -8    4.00    1.90
 -10   1  -8    5.40    1.90
 -10  -2   8   25.90    3.10
 -10   2   8   26.30    2.90
  -9  -2   8   -0.10    1.20
  -9   2   8    3.40    1.30
  -8  -2   8    4.60    1.60
  -8   2   8    4.90    1.30
  -7  -2   8   -0.40    1.00
  -7   2   8   -0.10    0.80
  -6  -2   8  245.78    9.00
  -6   2   8  247.38    8.30
  -5  -2   8   19.50    2.20
  -5   2   8   23.30    1.90
   5   2  -8   23.80    1.50
   4  -2  -8   25.90    1.30
  -4  -2   8   26.50    2.50
   4   2  -8   26.70    1.50
  -4   2   8   27.60    1.90
  -3  -2   8  113.89    4.90
   3   2  -8  117.09    4.30
  -3   2   8  117.39    4.50
   3   2  -8  121.89    4.50
  -2  -2   8  705.03   21.30
   2  -2  -8  733.93   20.20
   2   2  -8  744.93   20.80
  -2   2   8  720.83   20.80
   1  -2  -8   16.80    1.40
  -1  -2   8   16.60    1.90
  -1   2   8   20.30    1.70
   1   2  -8   16.70    1.70
   0  -2  -8    3.10    0.80
   0  -2   8    2.30    0.90
   0   2  -8    3.50    0.90
   0   2   8    3.30    0.90
   1  -2   8    2.40    0.90
  -1  -2  -8    1.50    0.70
   1   2   8    1.20    0.70
  -1   2  -8    1.70    0.80
  -2  -2  -8    4.40    1.10
   2  -2   8    2.30    1.00
   2   2   8    3.50    1.00
  -2   2  -8    4.00    1.00
   3  -2   8    3.80    1.10
  -3  -2  -8    2.70    0.90
   3   2   8    3.10    1.00
  -3   2  -8    3.80    1.10
  -4  -2  -8   34.40    2.50
   4  -2   8   40.40    2.70
  -4   2  -8   39.30    2.70
   4   2   8   35.60    2.50
   5  -2   8   16.50    2.00
  -5  -2  -8   13.50    1.90
  -5   2  -8   16.90    2.10
   5   2   8   16.60    2.00
  -6  -2  -8    5.50    1.40
   6  -2   8    2.60    1.10
   6   2   8    4.40    1.30
  -6   2  -8    5.00    1.40
  -7  -2  -8   25.70    2.80
   7   2   8   38.30    2.90
  -7   2  -8   34.60    2.90
  -8  -2  -8  162.88    7.00
  -8   2  -8  143.99    6.70
  -9  -2  -8    0.40    1.30
  -9   2  -8    0.00    1.20
 -10  -2  -8    4.90    1.90
 -10   2  -8    7.60    2.10
 -10  -3   8   12.00    2.40
 -10   3   8    9.20    1.80
  -9  -3   8   12.80    2.40
  -9   3   8   18.00    2.20
  -8  -3   8    6.60    1.80
  -8   3   8    5.80    1.30
  -7  -3   8  108.29    5.40
  -7   3   8  107.69    4.60
  -6  -3   8    1.90    1.10
  -6   3   8    4.10    1.00
  -5  -3   8   17.70    2.20
  -5   3   8   17.20    1.70
   5   3  -8   16.80    1.40
   4  -3  -8    1.00    0.40
  -4  -3   8    1.50    1.00
  -4   3   8    1.10    0.60
   4   3  -8    0.30    0.50
  -4   3   8    0.60    0.60
   4   3  -8    0.60    0.60
  -3  -3   8   83.39    4.20
   3   3  -8   85.89    3.70
   3   3  -8   84.29    3.50
  -3   3   8   84.29    3.40
   2  -3  -8  154.38    4.70
  -2   3   8  157.08    5.40
  -1  -3   8  348.67   11.50
   1  -3  -8  359.26   10.60
   1   3  -8  353.56   11.20
  -1   3   8  366.66   10.90
   0  -3   8   51.79    3.00
   0  -3  -8   55.39    2.60
   0   3  -8   50.59    2.80
   0   3   8   56.79    2.70
  -1  -3  -8  252.57    8.10
   1  -3   8  253.17    8.60
   1   3   8  250.57    8.20
  -1   3  -8  234.18    8.30
  -2  -3  -8    8.20    1.30
   2  -3   8    9.00    1.50
  -2   3  -8    8.50    1.40
   2   3   8    9.60    1.40
  -3  -3  -8  554.64   16.70
   3  -3   8  551.44   16.90
  -3   3  -8  560.84   16.90
   3   3   8  556.24   16.70
  -4  -3  -8    5.20    1.20
   4  -3   8    4.70    1.30
  -4   3  -8    4.70    1.30
   4   3   8    3.90    1.10
   5  -3   8  105.09    4.80
  -5  -3  -8  110.89    5.10
  -5   3  -8  114.79    5.10
   5   3   8  114.39    5.00
  -6  -3  -8    3.80    1.30
   6  -3   8    4.90    1.30
   6   3   8    4.80    1.40
  -6   3  -8    5.00    1.40
  -7  -3  -8   46.10    3.50
  -7   3  -8   47.40    3.40
   7   3   8   51.59    3.30
  -8  -3  -8    2.90    1.50
  -8   3  -8    4.00    1.60
  -9  -3  -8    1.60    1.50
  -9   3  -8    0.10    1.30
 -10  -3  -8    7.00    2.10
 -10   3  -8    8.30    2.10
 -10  -4   8   62.39    4.50
 -10   4   8   54.29    3.60
  -9  -4   8    2.60    1.60
  -9   4   8    5.50    1.40
  -8  -4   8   10.80    2.20
  -8   4   8    9.00    1.50
  -7  -4   8   11.80    2.20
  -7   4   8   17.90    1.80
  -6  -4   8  140.79    6.30
  -6   4   8  135.99    5.00
  -5  -4   8  101.79    5.00
   5   4  -8  100.89    3.80
  -5   4   8  102.49    3.90
   5   4  -8   99.59    4.10
  -4  -4   8  127.59    5.70
   4   4  -8  134.19    5.10
   4   4  -8  130.59    4.70
  -4   4   8  132.49    4.60
  -4   4   8  126.59    4.60
  -3   4   8    9.50    1.10
   3   4  -8    9.50    1.40
  -2   4   8  245.68    7.70
   2   4  -8  233.78    8.20
   2   4  -8  249.88    8.20
   1  -4  -8    0.60    0.50
  -1  -4   8    0.60    0.90
  -1   4   8    1.10    0.70
   1   4  -8    1.60    0.80
   0  -4   8  280.87    9.80
   0  -4  -8  297.27    9.10
   0   4   8  300.17    9.20
   0   4  -8  283.87    9.50
  -1  -4  -8   18.20    1.60
   1  -4   8   18.80    2.10
   1   4   8   12.30    1.50
  -1   4  -8   14.40    1.70
   2  -4   8 1069.29   30.80
  -2  -4  -8 1086.19   30.40
  -2   4  -8 1074.39   30.70
   2   4   8 1062.19   30.40
   3  -4   8   79.39    4.00
  -3  -4  -8   76.79    3.70
  -3   4  -8   75.49    3.90
   3   4   8   77.89    3.70
  -4  -4  -8  195.38    7.10
   4  -4   8  192.68    7.10
   4   4   8  180.58    6.80
  -4   4  -8  177.58    7.00
   5  -4   8   10.60    1.70
  -5  -4  -8   11.40    1.90
   5   4   8   11.40    1.80
  -5   4  -8   11.20    1.70
  -6  -4  -8   10.60    1.90
  -6   4  -8   12.80    2.00
   6   4   8   13.90    2.00
  -7  -4  -8   -0.70    1.10
   7   4   8    2.00    1.10
  -7   4  -8    1.80    1.20
  -8  -4  -8   71.49    4.50
  -8   4  -8   69.99    4.30
  -9  -4  -8    1.00    1.40
  -9   4  -8    0.20    1.20
 -10  -5   8    1.40    1.60
  -9  -5   8    5.40    1.80
  -9   5   8    6.60    1.40
  -8  -5   8    0.90    1.30
  -8   5   8    2.20    0.90
  -7  -5   8  204.78    8.60
  -7   5   8  214.78    7.10
  -6  -5   8   20.40    2.70
  -6   5   8   20.90    1.60
  -5  -5   8    2.60    1.20
   5   5  -8    3.80    0.90
   5   5  -8    3.60    1.00
  -5   5   8    3.90    0.80
  -4  -5   8   88.39    4.80
  -4   5   8  109.49    4.10
   4   5  -8  108.99    4.50
  -4   5   8  108.19    3.90
  -3   5   8   34.50    1.90
   3   5  -8   35.80    2.40
  -3   5   8   36.00    1.90
   3   5  -8   35.80    2.30
  -2  -5   8    6.10    1.40
   2   5  -8    8.50    1.40
   2   5  -8    6.70    1.30
  -2   5   8   10.60    1.20
  -1  -5   8  298.37   10.40
   1  -5  -8  314.07    9.10
   1   5  -8  310.17   10.10
  -1   5   8  308.47    9.60
   0  -5  -8    6.20    1.00
   0  -5   8    6.20    1.40
   0   5  -8    4.90    1.10
   0   5   8    4.60    1.00
  -1  -5  -8   38.10    2.20
   2  -5   8   19.70    2.20
  -2  -5  -8   19.10    1.90
  -2   5  -8   20.20    2.20
   2   5   8   18.60    1.90
   3  -5   8  889.61   26.20
  -3  -5  -8  891.81   25.90
   3   5   8  888.11   25.90
  -3   5  -8  929.51   26.30
  -4  -5  -8    7.40    1.50
   4  -5   8    8.50    1.50
  -4   5  -8    7.20    1.40
   4   5   8    6.60    1.40
  -5  -5  -8   92.99    4.50
   5  -5   8   82.99    4.10
  -5   5  -8   88.79    4.50
   5   5   8   92.19    4.40
  -6  -5  -8   -1.40    1.00
  -6   5  -8    1.40    1.10
   6   5   8   -0.60    0.90
  -7  -5  -8   29.30    3.20
   7   5   8   29.00    2.90
  -7   5  -8   31.40    3.10
  -8  -5  -8   -0.30    1.20
  -8   5  -8    0.90    1.20
  -9  -5  -8    6.00    1.90
  -9   5  -8    2.00    1.50
 -10  -6   8   42.80    4.30
  -9  -6   8    3.80    1.70
  -8  -6   8   13.50    2.40
  -8   6   8   16.10    1.70
  -7  -6   8    1.00    1.30
  -7   6   8    0.70    0.70
  -6  -6   8  166.28    7.20
  -6   6   8  161.48    5.40
  -5  -6   8   98.69    5.10
  -5   6   8   92.09    3.40
   5   6  -8   94.59    4.30
   5   6  -8   94.39    3.90
  -4  -6   8   94.79    4.90
   4  -6  -8   99.29    3.10
   4   6  -8   98.29    4.40
  -4   6   8  104.89    3.70
   4   6  -8   96.69    4.20
   3   6  -8  185.68    6.70
  -3   6   8  183.38    6.10
   3   6  -8  180.38    6.90
  -3   6   8  185.48    6.00
  -2  -6   8   82.59    4.30
  -2   6   8   82.09    3.30
   2   6  -8   82.89    3.90
   2   6  -8   85.09    4.10
   1  -6  -8  119.69    3.90
  -1  -6   8  114.79    5.30
   1   6  -8  117.59    5.20
  -1   6   8  121.69    4.40
   1   6  -8  122.19    5.00
   0  -6  -8  260.57    8.00
   0  -6   8  241.28    8.90
   0   6   8  262.67    8.30
   0   6  -8  244.68    8.70
   2  -6   8  139.69    5.80
  -2  -6  -8  144.89    5.40
   2   6   8  135.99    5.30
  -2   6  -8  135.39    5.70
   3  -6   8  151.78    5.90
  -3  -6  -8  138.49    5.60
  -3   6  -8  131.39    5.70
   3   6   8  148.19    5.70
  -4  -6  -8  210.38    7.40
   4  -6   8  196.58    7.30
  -4   6  -8  190.78    7.40
   4   6   8  189.68    7.20
  -5  -6  -8   32.60    2.70
  -5   6  -8   38.00    2.90
   5   6   8   34.80    2.70
  -6  -6  -8   83.49    4.60
  -6   6  -8   83.39    4.50
   6   6   8   88.39    4.50
  -7  -6  -8    0.90    1.30
  -7   6  -8   -0.60    1.00
   7   6   8   -0.40    0.90
  -8  -6  -8   27.60    3.20
  -8   6  -8   28.30    3.10
  -9  -6  -8   -0.50    1.30
  -9   6  -8   -0.30    1.20
  -9  -7   8    4.40    1.90
  -8  -7   8    2.30    1.50
  -8   7   8    2.10    0.90
  -7  -7   8  131.19    6.50
  -7   7   8  128.29    4.50
  -6  -7   8   18.80    2.70
  -6   7   8   17.00    1.30
  -5  -7   8   37.10    3.20
   5   7  -8   38.50    2.70
   5   7  -8   36.50    2.40
  -5   7   8   36.90    1.80
   4  -7  -8    3.00    0.50
  -4  -7   8    2.10    1.30
   4   7  -8    2.60    0.90
  -4   7   8    2.70    0.70
   4   7  -8    1.70    1.00
  -3  -7   8  338.67   11.70
   3   7  -8  336.07   11.20
   3   7  -8  344.47   10.90
  -3   7   8  321.67   10.20
  -3   7   8  336.27   10.00
  -2  -7   8   29.50    2.90
   2   7  -8   27.70    2.20
  -2   7   8   26.60    1.70
   2   7  -8   24.90    2.50
   1  -7  -8   40.50    1.60
  -1  -7   8   41.50    3.00
   1   7  -8   39.10    2.70
  -1   7   8   37.90    2.20
   1   7  -8   41.50    2.90
   0  -7  -8   40.80    2.10
   0  -7   8   41.70    3.00
   0   7  -8   40.80    2.70
   0   7   8   40.10    2.30
   1  -7   8  167.08    6.70
  -1   7  -8  166.78    6.50
  -2  -7  -8    0.50    0.70
   2  -7   8   -1.00    0.80
   2   7   8   -0.30    0.70
  -2   7  -8   -1.90    0.60
  -3  -7  -8  180.58    6.70
   3  -7   8  187.28    7.00
   3   7   8  173.38    6.70
  -3   7  -8  185.28    7.10
  -4  -7  -8    8.20    1.60
   4  -7   8    9.50    1.60
  -4   7  -8   12.30    1.90
   4   7   8    6.80    1.50
  -5  -7  -8  110.79    5.20
   5   7   8  111.69    5.10
  -5   7  -8  106.99    5.10
  -6  -7  -8   17.50    2.40
   6   7   8   17.80    2.30
  -6   7  -8   16.20    2.20
  -7  -7  -8   74.49    4.60
   7   7   8   79.09    4.30
  -7   7  -8   78.39    4.50
  -8  -7  -8   19.00    2.80
  -8   7  -8   18.50    2.60
  -9  -7  -8   10.50    2.40
  -9   7  -8   14.20    2.40
  -9  -8   8    5.60    1.90
  -8  -8   8    0.20    1.30
  -7  -8   8    0.80    1.30
  -7   8   8    0.10    0.50
  -6  -8   8  224.98    9.00
  -6   8   8  211.08    6.60
  -5  -8   8    4.70    1.60
  -5   8   8    8.10    0.90
   5   8  -8    7.10    1.40
   5   8  -8    9.10    1.60
   4  -8  -8   21.60    1.30
  -4  -8   8   27.90    3.00
   4   8  -8   21.10    2.10
  -4   8   8   23.90    1.50
   4   8  -8   23.40    2.50
  -3  -8   8   77.59    4.40
  -3   8   8   77.59    3.10
   3   8  -8   71.99    3.80
   3   8  -8   75.19    4.00
  -2  -8   8  656.93   20.50
  -2   8   8  664.03   19.00
   2   8  -8  652.53   20.20
   2   8  -8  676.63   19.90
  -1  -8   8  219.78    8.20
  -1   8   8  217.18    7.10
   1   8  -8  205.68    8.00
   1   8  -8  214.18    7.90
   0  -8  -8   17.60    1.30
   0  -8   8   16.60    2.10
   0   8   8   18.40    1.80
   0   8  -8   16.20    2.00
   0   8  -8   17.40    2.30
  -1  -8  -8   22.20    1.70
   1  -8   8   22.20    2.50
  -1   8  -8   21.00    2.30
  -2  -8  -8   25.70    2.00
   2  -8   8   22.40    2.30
   2   8   8   23.20    2.00
  -2   8  -8   29.40    2.50
   3  -8   8   33.90    2.60
  -3  -8  -8   31.60    2.40
  -3   8  -8   36.70    2.80
   3   8   8   32.80    2.50
  -4  -8  -8   29.30    2.70
  -4   8  -8   26.40    2.70
   4   8   8   32.30    2.60
  -5  -8  -8    9.60    1.90
   5   8   8   10.90    1.90
  -5   8  -8   11.80    1.90
  -6  -8  -8   29.60    3.10
   6   8   8   34.60    3.00
  -6   8  -8   29.10    3.00
  -7  -8  -8    1.60    1.40
  -7   8  -8    0.60    1.20
   7   8   8    1.90    1.30
  -8  -8  -8   43.00    4.20
  -8   8  -8   41.70    3.50
   8   8   8   44.50    3.50
  -9  -8  -8    0.70    1.50
  -9   8  -8   -1.10    1.10
  -9  -9   8   17.70    3.00
  -8  -9   8    8.70    2.20
  -7  -9   8   32.80    3.70
  -6  -9   8    1.90    1.40
  -6   9   8    2.70    0.60
  -5  -9   8   58.09    4.10
  -5   9   8   59.89    2.40
   5   9  -8   57.19    3.30
  -4  -9   8    8.00    2.00
   4   9  -8    7.50    1.60
   4   9  -8    9.60    1.60
  -4   9   8    6.70    0.90
   3  -9  -8    7.80    1.10
  -3  -9   8    4.50    1.50
   3   9  -8    4.60    1.30
   3   9  -8    4.10    1.40
  -3   9   8    6.60    1.00
  -2  -9   8   26.80    2.80
   2   9  -8   21.20    2.50
  -2   9   8   23.90    1.80
   2   9  -8   28.00    2.70
  -1  -9   8   89.79    4.70
  -1   9   8   92.19    3.80
   1   9  -8   93.99    4.50
   1   9  -8   87.89    4.60
   0  -9  -8   37.10    1.90
   0  -9   8   42.10    3.00
   0   9  -8   41.30    3.10
   0   9  -8   39.10    2.80
   0   9   8   41.90    2.50
  -1  -9  -8   84.09    3.40
   1  -9   8   76.79    4.10
  -1   9  -8   83.09    4.50
   1   9   8   72.19    3.60
  -1   9  -8   69.29    4.00
   2  -9   8   11.60    1.80
  -2  -9  -8    8.60    1.40
  -2   9  -8   11.80    1.80
   2   9   8    8.50    1.40
   3  -9   8   24.90    2.50
  -3  -9  -8   25.10    2.20
  -3   9  -8   24.70    2.60
   3   9   8   27.80    2.40
  -4  -9  -8   56.49    3.40
  -4   9  -8   60.99    3.70
   4   9   8   53.99    3.40
  -5  -9  -8   18.10    2.40
  -5   9  -8   28.90    2.90
   5   9   8   27.60    2.80
  -6  -9  -8   41.30    3.40
  -6   9  -8   45.70    3.50
   6   9   8   53.69    3.50
  -7  -9  -8   56.59    4.00
  -7   9  -8   51.99    3.80
   7   9   8   52.99    3.70
  -8  -9  -8    0.80    1.50
  -8   9  -8    2.00    1.50
   8   9   8    0.00    1.10
  -9  -9  -8   23.00    3.30
  -9   9  -8   17.60    2.80
  -9 -10   8    1.40    1.70
  -8 -10   8   12.70    2.60
  -7 -10   8    2.80    1.70
  -6 -10   8   55.29    4.20
  -6  10   8   56.99    2.30
  -5 -10   8    0.80    1.30
  -5  10   8   -0.10    0.50
   5  10  -8   -0.10    0.90
  -4 -10   8  113.79    5.90
   4  10  -8  119.49    5.60
   4  10  -8  112.59    5.20
  -4  10   8  116.79    4.10
  -3 -10   8    0.70    1.20
   3 -10  -8    0.80    0.70
   3  10  -8    0.80    1.10
   3  10  -8    0.90    0.90
  -3  10   8    0.30    0.60
  -2 -10   8   21.90    2.60
   2  10  -8   19.60    2.50
  -2  10   8   23.00    1.70
   2  10  -8   15.30    2.00
  -1 -10   8   23.80    2.60
   1  10  -8   27.50    2.70
   1  10  -8   29.00    3.00
  -1  10   8   30.60    2.00
   0 -10   8   33.60    2.90
   0 -10  -8   40.00    1.90
   0  10   8   39.90    2.50
   0  10  -8   37.60    3.00
   0  10  -8   38.40    2.90
   1 -10   8  103.09    4.90
  -1 -10  -8   96.89    4.00
   1  10   8   97.89    4.40
  -1  10  -8   98.69    4.90
  -1  10  -8  104.39    5.30
   2 -10   8   19.00    2.20
  -2 -10  -8   13.20    1.70
  -2  10  -8   16.40    2.40
  -2  10  -8   17.90    2.30
   2  10   8   18.40    2.10
   3 -10   8   20.70    2.30
  -3 -10  -8   20.30    2.20
  -3  10  -8   19.40    2.30
   3  10   8   19.10    2.20
  -4 -10  -8   96.29    4.60
   4  10   8   91.69    4.60
  -4  10  -8   98.59    5.00
  -5 -10  -8   27.00    3.00
   5  10   8   28.40    2.90
  -5  10  -8   28.80    3.00
  -6 -10  -8   58.79    4.10
  -6  10  -8   63.79    4.10
   6  10   8   67.09    4.10
  -7 -10  -8    0.60    1.30
  -7  10  -8    1.30    1.30
   7  10   8    1.90    1.40
  -8 -10  -8   47.30    4.00
   8  10   8   43.50    3.60
  -8  10  -8   43.50    3.70
  -8 -11   8   -1.60    1.30
  -7 -11   8   62.59    4.60
  -6 -11   8   15.70    2.70
  -6  11   8   12.50    1.10
  -5 -11   8   19.00    2.90
  -5  11   8   15.70    1.30
   5  11  -8   15.70    2.10
  -4 -11   8    3.30    1.50
  -4  11   8    5.60    1.00
   4  11  -8    7.10    1.50
   4  11  -8    7.80    1.80
  -3 -11   8   58.99    4.10
  -3  11   8   58.39    2.80
   3  11  -8   64.89    4.00
   3  11  -8   69.09    3.90
   2 -11  -8    2.30    1.00
  -2 -11   8    6.30    1.70
   2  11  -8    6.00    1.60
  -2  11   8    4.00    1.00
   2  11  -8    4.30    1.40
  -1 -11   8   -0.40    1.00
   1  11  -8    0.00    1.00
  -1  11   8   -0.60    0.70
   1  11  -8    0.30    1.10
   0 -11   8    2.30    1.20
   0  11  -8   -0.10    0.90
   0  11   8    2.20    0.90
   0  11  -8    3.30    1.30
  -1 -11  -8   23.60    1.80
   1 -11   8   26.30    2.70
  -1  11  -8   26.40    3.00
  -1  11  -8   25.20    2.70
   1  11   8   26.80    2.20
  -2 -11  -8   35.70    2.40
   2 -11   8   37.50    2.80
  -2  11  -8   36.20    3.00
   2  11   8   31.20    2.50
  -2  11  -8   34.80    3.10
  -3 -11  -8  145.49    5.90
   3 -11   8  147.59    5.90
   3  11   8  142.69    6.00
  -3  11  -8  150.88    6.50
  -3  11  -8  141.09    6.80
  -4 -11  -8   21.80    2.40
  -4  11  -8   18.90    2.60
   4  11   8   18.70    2.30
  -5 -11  -8   60.89    3.80
   5  11   8   59.29    3.80
  -5  11  -8   54.69    3.80
  -6 -11  -8    5.40    1.70
  -6  11  -8    3.50    1.50
   6  11   8    3.20    1.50
  -7 -11  -8   11.60    2.30
  -7  11  -8   12.90    2.30
   7  11   8   11.00    2.20
  -8 -11  -8   -1.50    1.30
   8  11   8    1.00    1.30
  -8  11  -8    0.90    1.30
  -8 -12   8   21.20    3.20
  -7 -12   8   11.60    2.50
  -6 -12   8   34.40    3.90
  -5 -12   8   16.80    2.80
  -5  12   8   13.70    1.30
   5  12  -8   12.60    2.00
  -4 -12   8  227.28    9.10
  -4  12   8  209.98    6.80
   4  12  -8  200.88    8.10
   4  12  -8  202.58    8.50
  -3 -12   8   20.10    2.70
   3  12  -8   19.70    2.50
  -3  12   8   20.50    1.70
   3  12  -8   20.90    2.80
  -2 -12   8    0.50    1.20
   2  12  -8   -0.10    1.00
  -2  12   8    1.70    0.80
   2  12  -8   -1.50    0.90
  -1 -12   8    4.40    1.50
   1  12  -8    3.50    1.50
   1  12  -8    3.90    1.40
  -1  12   8    3.80    1.00
   0 -12   8   38.70    3.10
   0  12  -8   39.70    3.20
   0  12  -8   38.90    3.40
   0  12   8   36.50    2.60
   1 -12   8    6.70    1.60
  -1  12  -8    6.50    1.70
   1  12   8    7.60    1.50
  -1  12  -8    9.30    1.80
  -2 -12  -8   40.30    2.50
   2 -12   8   35.80    2.80
   2  12   8   36.50    2.80
  -2  12  -8   39.00    3.90
  -2  12  -8   37.50    3.20
  -3 -12  -8   66.89    3.70
  -3  12  -8   77.09    4.40
   3  12   8   66.49    3.90
  -3  12  -8   75.49    4.80
  -4 -12  -8   62.99    3.70
  -4  12  -8   73.19    4.40
   4  12   8   71.59    4.10
  -4  12  -8   62.79    4.60
  -5 -12  -8   34.00    3.30
   5  12   8   39.40    3.60
  -5  12  -8   34.10    3.40
  -6 -12  -8   17.20    2.50
  -6  12  -8   14.00    2.40
   6  12   8   16.10    2.40
  -7 -12  -8    1.50    1.50
   7  12   8   -0.30    1.20
  -7  12  -8   -0.10    1.20
  -8 -12  -8   20.20    3.00
   8  12   8   22.50    3.00
  -8  12  -8   24.00    3.10
  -8 -13   8    3.40    2.00
  -7 -13   8   20.60    3.20
  -6 -13   8    6.10    2.00
  -5 -13   8    2.90    1.70
   5  13  -8    4.00    1.40
  -5  13   8    5.60    1.00
  -4 -13   8   63.19    4.50
  -4  13   8   67.39    3.10
   4  13  -8   74.19    4.60
   4  13  -8   71.09    4.20
  -3 -13   8   13.40    2.40
  -3  13   8   15.20    1.60
   3  13  -8    8.80    1.90
   3  13  -8   13.20    2.10
  -2 -13   8   12.80    2.30
   2  13  -8   16.00    2.50
   2  13  -8   18.30    2.50
  -2  13   8   10.80    1.50
  -1 -13   8   18.10    2.50
   1  13  -8   18.60    2.70
  -1  13   8   20.70    2.10
   1  13  -8   28.30    3.10
   0 -13   8    4.10    1.50
   0  13  -8    8.30    1.90
   0  13  -8    2.20    1.30
   0  13   8    2.60    1.20
   1 -13   8  161.58    6.80
  -1  13  -8  165.48    7.60
   1  13   8  169.98    6.60
  -1  13  -8  165.98    7.20
   2 -13   8   42.30    3.00
  -2  13  -8   41.10    3.60
  -2  13  -8   39.00    3.30
   2  13   8   43.10    3.00
  -3 -13  -8  101.79    4.70
  -3  13  -8  100.69    5.80
   3  13   8  105.69    5.10
  -3  13  -8  101.09    5.40
  -4 -13  -8    5.30    1.40
  -4  13  -8    9.20    2.00
   4  13   8    9.80    1.90
  -4  13  -8    5.90    1.80
  -5 -13  -8   71.19    4.20
  -5  13  -8   68.09    4.50
  -5  13  -8   72.99    5.00
   5  13   8   75.49    4.40
  -6 -13  -8    1.80    1.40
  -6  13  -8    1.00    1.40
   6  13   8    3.00    1.50
  -6  13  -8   -0.10    1.20
  -7 -13  -8    6.40    1.90
  -7  13  -8    5.80    1.80
   7  13   8    3.90    1.70
  -7 -14   8    0.30    1.60
  -6 -14   8   22.20    3.20
  -5 -14   8   13.40    2.60
   5  14  -8   14.80    2.30
  -5  14   8   17.00    1.60
  -4 -14   8    5.50    1.90
   4  14  -8    7.70    1.90
  -4  14   8    6.90    1.20
   4  14  -8    4.40    1.50
  -3 -14   8    0.40    1.30
  -3  14   8   -0.20    0.80
   3  14  -8    0.60    1.40
   3  14  -8   -0.90    1.10
  -2 -14   8  174.68    7.50
   2  14  -8  172.38    7.80
  -2  14   8  167.68    6.30
   2  14  -8  161.98    7.20
  -1 -14   8   25.60    3.00
   1  14  -8   23.20    2.80
  -1  14   8   22.40    2.30
   1  14  -8   20.20    2.90
   0 -14   8    1.60    1.30
   0  14   8    2.80    1.10
   0  14  -8    1.50    1.30
   0  14  -8    0.70    1.20
   1 -14   8    8.00    1.70
  -1  14  -8    6.40    1.80
   1  14   8    9.40    1.70
  -1  14  -8    8.80    2.10
  -2  14  -8  296.47   11.70
   2  14   8  298.37   10.50
  -2  14  -8  304.07   11.10
   3  14   8   56.79    3.70
  -3  14  -8   44.90    3.60
  -3  14  -8   45.00    4.00
  -4 -14  -8    2.60    1.30
  -4  14  -8    2.00    1.50
   4  14   8    2.20    1.40
  -4  14  -8    5.00    1.70
  -5 -14  -8    2.60    1.40
   5  14   8    2.30    1.50
  -5  14  -8    1.00    1.40
  -5  14  -8    4.10    1.60
  -6 -14  -8   46.60    3.70
   6  14   8   52.89    3.90
  -6  14  -8   49.20    4.90
  -6  14  -8   45.70    3.80
  -7 -14  -8   -1.40    1.20
  -7  14  -8    1.60    1.40
   7  14   8   -1.50    1.40
  -7 -15   8   29.50    3.80
  -6 -15   8    1.60    1.50
  -5 -15   8    6.70    2.10
  -5  15   8    8.10    1.30
   5  15  -8    8.40    1.90
  -4 -15   8    0.00    1.50
   4  15  -8    0.40    1.40
  -4  15   8    1.60    0.90
   4  15  -8    1.80    1.40
  -3 -15   8   79.59    4.90
   3  15  -8   71.69    4.60
  -3  15   8   78.99    3.70
   3  15  -8   82.19    5.10
  -2 -15   8   15.00    2.40
   2  15  -8   13.00    2.30
   2  15  -8   18.40    2.90
  -2  15   8   20.40    2.20
  -1 -15   8   38.10    3.20
  -1  15   8   30.40    2.50
   1  15  -8   34.90    3.70
   1  15  -8   27.20    3.50
   0 -15   8    0.50    1.10
   0  15  -8    2.70    1.50
   0  15  -8    0.20    1.20
   0  15   8   -0.30    1.00
  -1  15  -8  133.99    7.10
   1  15   8  146.69    6.10
  -1  15  -8  135.09    6.60
  -2  15  -8   15.40    2.70
   2  15   8   23.30    2.70
  -2  15  -8   20.20    2.80
   3  15   8   59.49    3.90
  -3  15  -8   50.59    3.90
  -3  15  -8   59.09    4.60
  -4  15  -8    0.50    1.30
   4  15   8    1.90    1.40
  -4  15  -8    1.30    1.40
  -5 -15  -8   26.40    3.00
   5  15   8   25.50    3.10
  -5  15  -8   23.20    3.00
  -5  15  -8   22.60    3.20
  -6 -15  -8    3.90    1.70
  -6  15  -8    3.80    1.70
   6  15   8    2.80    1.60
  -6 -16   8    6.90    2.30
  -5 -16   8   -0.30    1.50
  -5  16   8   -0.80    0.70
   5  16  -8    0.30    1.20
  -4 -16   8   38.30    4.00
  -4  16   8   36.70    2.50
   4  16  -8   24.10    3.10
  -3 -16   8   23.70    3.20
  -3  16   8   21.40    2.20
   3  16  -8   17.30    2.90
   3  16  -8   19.30    2.80
  -2 -16   8  112.89    5.90
   2  16  -8  120.09    6.10
   2  16  -8  104.89    6.30
  -2  16   8  124.29    5.20
  -1 -16   8    3.30    1.50
   1  16  -8    2.80    1.50
  -1  16   8    1.90    1.10
   1  16  -8    1.70    1.60
   0 -16   8   19.80    2.50
   0  16  -8   22.60    3.30
   0  16  -8   28.60    3.30
   0  16   8   18.10    2.30
   1  16   8    3.30    1.30
  -1  16  -8    1.60    1.40
  -1  16  -8    1.50    1.60
   2  16   8   91.39    4.90
  -2  16  -8  104.49    6.20
  -2  16  -8   99.19    5.50
  -3  16  -8    4.30    1.90
  -3  16  -8    1.50    1.40
   3  16   8    2.90    1.50
   4  16   8   -1.40    1.10
  -4  16  -8   -0.40    1.20
  -4  16  -8    1.30    1.50
   5  16   8    0.40    1.30
  -5  16  -8   -1.60    1.10
  -6  16  -8   38.30    4.10
   6  16   8   47.50    3.90
  -6 -17   8    5.30    2.10
  -5 -17   8    6.40    2.10
   5  17  -8    6.60    1.80
  -5  17   8    6.90    1.40
  -4 -17   8    9.70    2.30
  -4  17   8   13.50    1.90
   4  17  -8   13.40    2.60
  -3 -17   8   45.40    4.30
   3  17  -8   41.60    4.40
  -3  17   8   40.20    2.90
   3  17  -8   44.40    3.80
  -2 -17   8    4.00    1.70
  -2  17   8    2.60    1.20
   2  17  -8    3.60    1.80
   2  17  -8    4.30    1.90
  -1 -17   8   67.69    4.40
  -1  17   8   79.19    4.20
   1  17  -8   71.39    4.80
   1  17  -8   82.99    5.30
   0  17  -8    4.90    1.90
   0  17   8    3.70    1.50
   0  17  -8    1.70    1.70
   1  17   8   49.30    3.50
  -1  17  -8   46.40    4.00
  -1  17  -8   55.19    4.50
  -2  17  -8    2.60    1.80
   2  17   8    0.50    1.20
  -2  17  -8    2.60    1.50
  -3  17  -8    0.50    1.40
   3  17   8    0.20    1.20
   4  17   8    2.20    1.40
  -4  17  -8    1.90    1.60
   5  17   8    8.40    2.10
  -5  17  -8    7.30    2.10
  -5 -18   8   -1.60    1.40
   5  18  -8    1.90    1.60
  -5  18   8   -0.10    0.90
  -4 -18   8    9.40    2.30
   4  18  -8   12.60    2.60
  -4  18   8   10.00    1.70
  -3 -18   8    5.50    2.00
   3  18  -8    4.70    1.90
  -3  18   8    6.40    1.60
  -2 -18   8  131.09    6.60
   2  18  -8  146.39    7.10
  -2  18   8  129.89    5.90
  -1  18   8   21.70    2.60
   1  18  -8   24.20    3.20
   0  18   8   14.10    2.20
   0  18  -8   20.50    3.10
  -1  18  -8    2.00    1.60
   1  18   8   -1.40    1.00
  -2  18  -8    8.60    2.10
   2  18   8   10.30    2.10
   3  18   8   -0.20    1.20
  -3  18  -8    0.40    1.40
  -4  18  -8   -0.60    1.30
   4  18   8    1.70    1.50
  -4 -19   8   -1.70    1.50
   4  19  -8    1.40    1.70
  -4  19   8   -0.20    1.00
  -3 -19   8    1.80    1.70
  -3  19   8    1.40    1.20
   3  19  -8    4.00    1.90
  -2  19   8    0.70    1.20
   2  19  -8   -0.40    1.40
   1  19  -8   13.40    2.70
  -1  19   8   14.40    2.30
   0  19   8    2.80    1.50
   0  19  -8    4.10    1.80
   1  19   8   23.10    2.90
  -1  19  -8   21.90    3.10
   2  19   8   -0.60    1.20
  -2  19  -8   -0.20    1.30
   3  19   8   15.80    2.50
  -3  19  -8   10.90    2.50
   2  20  -8    7.20    2.20
  -2  20   8    8.40    1.90
  -1  20   8    0.40    1.30
   1  20  -8    1.30    1.60
   0  20  -8    1.10    1.60
   0  20   8    2.30    1.50
   1  20   8   -0.60    1.20
  -1  20  -8    3.00    1.80
   2  20   8    1.30    1.40
  -2  20  -8    0.80    1.50
 -10   0   9    0.00    1.20
  -9   0   9   12.20    2.10
  -8   0   9   -0.80    1.00
  -7   0   9  107.19    5.20
  -6   0   9    0.60    1.10
   5   0  -9    1.50    0.60
  -5   0   9    0.80    0.90
   4   0  -9    0.30    0.50
  -4   0   9   -0.50    0.80
   3   0  -9  756.32   20.90
  -3   0   9  737.63   22.00
   2   0  -9    0.60    0.60
  -2   0   9   -0.70    0.70
   1   0  -9   92.19    3.80
   0   0   9    0.60    0.70
   0   0  -9    1.10    0.70
   1   0   9    7.60    1.40
  -1   0  -9   11.60    1.60
   2   0   9    0.30    0.90
  -2   0  -9   -0.90    0.70
  -3   0  -9   36.90    2.60
   3   0   9   37.70    2.70
  -4   0  -9    0.30    0.80
   4   0   9   -0.20    0.80
   5   0   9   -0.40    0.90
  -5   0  -9    1.00    0.90
   6   0   9    0.50    1.10
  -6   0  -9    0.00    1.00
  -7   0  -9  113.19    5.60
  -8   0  -9    3.00    1.40
  -9   0  -9   91.99    5.40
 -10  -1   9    2.10    1.50
 -10   1   9    2.10    1.30
  -9  -1   9    3.90    1.60
  -9   1   9    3.10    1.40
  -8  -1   9    0.50    1.20
  -8   1   9   -1.20    1.00
  -7  -1   9    2.40    1.30
  -7   1   9    1.30    1.10
  -6  -1   9  366.06   12.40
  -6   1   9  366.16   12.00
   5  -1  -9    4.60    0.60
  -5  -1   9    1.70    1.10
  -5   1   9    3.50    1.10
   5   1  -9    3.90    0.80
   4  -1  -9  164.08    5.30
  -4  -1   9  155.98    6.30
  -4   1   9  160.88    6.10
   4   1  -9  155.78    4.90
   3  -1  -9   12.50    0.90
  -3  -1   9   11.00    1.70
   3   1  -9   13.40    1.30
  -3   1   9   13.30    1.70
   2  -1  -9  436.46   12.60
  -2  -1   9  420.56   13.50
  -2   1   9  433.86   13.30
   2   1  -9  426.16   12.90
   1  -1  -9   23.70    1.70
   1   1  -9   20.70    1.70
  -1   1   9   16.30    1.80
   0  -1   9   54.59    3.10
   0  -1  -9   57.69    2.90
   0   1  -9   50.59    2.80
   1  -1   9    1.90    0.90
  -1  -1  -9    0.80    0.80
  -1   1  -9    3.60    1.10
   1   1   9    1.00    0.80
   2  -1   9  158.28    6.30
  -2  -1  -9  159.48    6.10
  -2   1  -9  160.58    6.20
   2   1   9  160.18    6.20
   3  -1   9   -0.50    0.80
  -3  -1  -9   -1.00    0.70
  -3   1  -9    0.60    0.80
   3   1   9    0.50    0.80
  -4  -1  -9    7.70    1.50
   4  -1   9    8.00    1.50
   4   1   9    7.80    1.50
  -4   1  -9    8.10    1.60
   5  -1   9   28.70    2.80
  -5  -1  -9   29.20    2.80
   5   1   9   19.10    2.30
  -5   1  -9   20.90    2.40
   6  -1   9  240.58    8.70
  -6  -1  -9  231.48    8.80
   6   1   9  233.38    8.70
  -6   1  -9  226.08    8.70
  -7  -1  -9    3.10    1.50
  -7   1  -9    4.50    1.60
   7   1   9    6.30    1.70
  -8  -1  -9   87.19    5.00
  -8   1  -9   94.09    5.20
  -9  -1  -9    0.90    1.40
  -9   1  -9    0.30    1.40
 -10  -2   9    0.70    1.40
 -10   2   9    1.00    1.30
  -9  -2   9   -0.30    1.20
  -9   2   9    1.50    1.20
  -8  -2   9    4.10    1.60
  -8   2   9    4.80    1.40
  -7  -2   9   56.39    3.90
  -7   2   9   57.09    3.40
  -6  -2   9    1.30    1.20
  -6   2   9    0.50    0.90
  -5  -2   9    5.30    1.40
  -5   2   9    3.60    1.10
   4  -2  -9   73.79    2.80
  -4  -2   9   71.49    4.00
  -4   2   9   73.79    3.50
   4   2  -9   71.89    2.90
   4   2  -9   78.19    3.40
  -3  -2   9  528.95   16.60
  -3   2   9  530.45   16.00
   3   2  -9  529.35   15.90
   3   2  -9  554.94   15.70
   2   2  -9   13.20    1.40
   1  -2  -9  297.57    9.40
  -1   2   9  306.37    9.80
   1   2  -9  310.97    9.80
   1  -2   9   82.69    4.10
  -1  -2  -9   81.09    3.70
  -1   2  -9   84.49    4.00
   1   2   9   84.89    3.90
   2  -2   9  103.29    4.60
  -2  -2  -9   92.49    4.20
  -2   2  -9   90.89    4.30
   2   2   9   88.99    4.20
   3  -2   9  197.08    7.30
  -3  -2  -9  186.78    7.10
   3   2   9  193.78    7.10
  -3   2  -9  188.18    7.20
   4  -2   9   12.30    1.80
  -4  -2  -9   13.30    1.90
   4   2   9    9.40    1.60
  -4   2  -9   12.90    2.00
   5  -2   9  197.68    7.50
  -5  -2  -9  194.28    7.50
  -5   2  -9  186.88    7.50
   5   2   9  190.98    7.40
   6  -2   9   48.30    3.30
  -6  -2  -9   48.90    3.50
   6   2   9   44.60    3.30
  -6   2  -9   44.90    3.30
  -7  -2  -9   29.70    3.20
   7   2   9   25.90    2.80
  -7   2  -9   27.60    3.00
  -8  -2  -9    5.60    1.70
  -8   2  -9    5.00    1.70
  -9  -2  -9   35.40    3.80
  -9   2  -9   30.20    3.40
 -10  -3   9    5.00    1.80
 -10   3   9    8.80    1.80
  -9  -3   9    0.70    1.40
  -9   3   9    1.70    1.10
  -8  -3   9   44.90    3.60
  -8   3   9   43.90    3.10
  -7  -3   9   60.89    4.20
  -7   3   9   68.99    3.60
  -6  -3   9   38.60    3.20
  -6   3   9   40.00    2.60
  -5  -3   9    1.40    1.20
  -5   3   9    1.40    0.90
   5   3  -9    1.20    0.70
  -4  -3   9  175.48    7.20
   4   3  -9  183.58    6.10
   4   3  -9  180.88    6.40
  -4   3   9  189.38    6.50
  -3  -3   9   90.29    4.50
   3   3  -9   92.99    3.80
   3   3  -9   92.69    4.00
  -3   3   9   90.29    3.90
   2  -3  -9   66.09    2.50
   2   3  -9   65.99    3.20
  -2   3   9   73.39    3.30
   1  -3  -9    3.30    0.80
  -1  -3   9    3.40    1.10
   1   3  -9    4.90    1.10
  -1   3   9    2.10    0.90
   0  -3  -9  106.29    4.20
  -1  -3  -9   48.10    2.70
   1  -3   9   52.09    3.20
  -1   3  -9   47.70    2.90
   1   3   9   46.40    2.70
   2  -3   9  186.78    7.20
  -2  -3  -9  184.98    6.90
  -2   3  -9  197.18    7.20
   2   3   9  193.18    7.00
  -3  -3  -9   60.29    3.30
   3  -3   9   58.59    3.50
  -3   3  -9   56.89    3.40
   3   3   9   60.39    3.40
  -4  -3  -9   23.00    2.40
   4  -3   9   26.20    2.70
   4   3   9   23.70    2.50
  -4   3  -9   23.70    2.50
  -5  -3  -9    0.70    0.90
   5  -3   9    0.40    1.00
  -5   3  -9    0.20    1.00
   5   3   9    0.40    1.00
  -6  -3  -9   55.59    3.70
   6  -3   9   61.09    3.60
   6   3   9   54.59    3.60
  -6   3  -9   55.99    3.80
  -7  -3  -9   12.50    2.20
   7   3   9   12.60    2.00
  -7   3  -9   15.30    2.40
  -8  -3  -9   30.60    3.30
  -8   3  -9   24.10    2.90
  -9  -3  -9    1.40    1.50
  -9   3  -9    0.10    1.30
  -9  -4   9   55.39    4.20
  -9   4   9   50.49    3.30
  -8  -4   9    3.00    1.50
  -8   4   9    1.30    1.00
  -7  -4   9   51.59    3.90
  -7   4   9   50.99    3.00
  -6  -4   9   -0.40    1.10
  -6   4   9    0.00    0.70
  -5  -4   9    6.80    1.60
  -5   4   9    7.30    1.20
   5   4  -9    9.70    1.40
  -4  -4   9   34.00    2.90
  -4   4   9   34.90    2.20
   4   4  -9   33.00    2.10
   4   4  -9   29.10    2.20
   3   4  -9    3.10    1.00
   3   4  -9    0.70    0.50
  -3   4   9    3.20    0.90
   2  -4  -9    7.90    0.70
   2   4  -9    7.90    1.40
   2   4  -9    7.40    1.40
  -2   4   9    5.80    1.10
   1  -4  -9  697.43   19.50
  -1  -4   9  685.83   20.90
   1   4  -9  675.73   20.30
  -1   4   9  700.33   20.00
   0  -4   9   11.10    1.90
   0  -4  -9   11.50    1.40
   0   4  -9   10.40    1.60
  -1  -4  -9  357.36   11.30
   1  -4   9  368.86   12.00
  -1   4  -9  358.86   11.80
  -2  -4  -9    8.90    1.50
   2  -4   9    7.90    1.60
  -2   4  -9   10.50    1.60
   2   4   9    8.10    1.40
   3  -4   9   51.59    3.30
  -3  -4  -9   54.99    3.20
  -3   4  -9   49.99    3.30
   3   4   9   56.59    3.20
  -4  -4  -9   16.10    2.10
   4  -4   9   13.30    1.90
  -4   4  -9   16.90    2.30
   4   4   9   16.90    2.10
   5  -4   9   25.20    2.60
  -5  -4  -9   31.50    2.70
   5   4   9   32.60    2.70
  -5   4  -9   27.20    2.80
  -6  -4  -9   61.39    3.80
  -6   4  -9   59.59    3.80
   6   4   9   59.29    3.70
  -7  -4  -9   -0.30    1.10
  -7   4  -9   -1.50    1.00
   7   4   9   -1.60    0.80
  -8  -4  -9    2.50    1.50
  -8   4  -9    0.70    1.30
  -9  -4  -9   12.50    2.60
  -9   4  -9   10.80    2.30
  -9  -5   9    5.20    2.00
  -9   5   9    4.60    1.30
  -8  -5   9   22.00    3.00
  -8   5   9   23.40    2.30
  -7  -5   9    8.10    2.10
  -7   5   9    8.10    1.40
  -6  -5   9   25.50    3.10
  -6   5   9   21.00    1.90
  -5  -5   9   25.20    2.80
  -5   5   9   28.40    1.90
   5   5  -9   25.50    2.10
  -4  -5   9   47.30    3.40
   4   5  -9   45.10    2.80
  -4   5   9   45.90    2.40
  -3   5   9  118.89    4.40
   3   5  -9  112.09    4.70
   3   5  -9  114.49    4.90
  -2  -5   9  166.68    6.90
   2   5  -9  168.58    6.50
   2   5  -9  165.48    6.30
  -2   5   9  162.38    5.80
  -1  -5   9   74.79    4.10
   1  -5  -9   69.29    2.80
   1   5  -9   71.19    3.60
  -1   5   9   70.59    3.30
   0  -5   9  262.97    9.60
   0  -5  -9  279.97    8.70
   0   5   9  270.47    8.90
   0   5  -9  273.47    9.40
  -1  -5  -9   -0.40    0.60
   1  -5   9    0.30    0.90
   1   5   9    0.20    0.20
  -1   5  -9    0.10    0.80
  -2  -5  -9  230.88    8.00
   2  -5   9  230.68    8.50
   2   5   9  235.48    8.20
  -2   5  -9  236.58    8.50
   3  -5   9   54.79    3.50
  -3  -5  -9   58.59    3.30
  -3   5  -9   57.79    3.50
   3   5   9   57.39    3.30
  -4  -5  -9   58.89    3.40
   4  -5   9   56.99    3.50
   4   5   9   63.59    3.50
  -4   5  -9   49.80    3.40
  -5  -5  -9    2.10    1.30
   5  -5   9    1.60    1.10
  -5   5  -9    1.60    1.20
   5   5   9    1.90    1.20
  -6  -5  -9   42.10    3.30
   6   5   9   41.40    3.10
  -6   5  -9   39.20    3.20
  -7  -5  -9   35.00    3.40
  -7   5  -9   40.30    3.40
   7   5   9   33.60    2.90
  -8  -5  -9   26.70    3.20
  -8   5  -9   22.00    2.90
  -9  -5  -9    2.20    1.60
  -9   5  -9    2.00    1.60
  -9  -6   9   39.10    4.20
  -8  -6   9    3.40    1.80
  -8   6   9    5.10    1.20
  -7  -6   9    5.40    1.80
  -7   6   9    5.50    1.10
  -6  -6   9    1.20    1.40
  -6   6   9    0.20    0.60
  -5  -6   9  129.79    6.10
   5   6  -9   99.89    4.80
   5   6  -9  136.29    5.30
  -5   6   9  127.29    4.60
  -4  -6   9   35.20    3.00
  -4   6   9   32.20    2.00
   4   6  -9   30.40    2.40
   4   6  -9   31.80    2.30
  -3  -6   9   11.50    1.90
   3   6  -9    9.70    1.40
  -3   6   9   11.80    1.30
   3   6  -9   11.70    1.70
  -2  -6   9   25.00    2.70
   2   6  -9   28.10    2.30
  -2   6   9   25.20    1.80
   2   6  -9   26.10    2.30
  -1  -6   9  282.97   10.20
   1  -6  -9  281.17    8.50
   1   6  -9  277.57    9.70
  -1   6   9  289.57    9.20
   1   6  -9  299.57   10.10
   0  -6  -9   10.20    1.20
   0  -6   9    8.20    1.60
   0   6   9    6.50    1.20
   0   6  -9   10.90    1.80
   1  -6   9  161.38    6.60
  -1  -6  -9  161.18    5.80
  -1   6  -9  157.48    6.40
  -2  -6  -9   57.59    3.00
   2  -6   9   49.00    3.30
   2   6   9   45.80    2.90
  -2   6  -9   54.79    3.40
  -3  -6  -9  123.69    5.10
   3  -6   9  116.39    5.30
  -3   6  -9  113.29    5.30
   3   6   9  115.89    5.10
   4  -6   9   24.70    2.60
  -4  -6  -9   23.80    2.40
  -4   6  -9   25.40    2.80
   4   6   9   25.60    2.60
   5  -6   9  332.57   11.20
  -5  -6  -9  353.56   11.60
   5   6   9  318.87   11.20
  -5   6  -9  317.57   11.50
  -6  -6  -9   -0.20    1.00
   6   6   9    0.30    1.10
  -6   6  -9    0.60    1.10
  -7  -6  -9   15.30    2.50
  -7   6  -9   18.70    2.60
   7   6   9   13.90    2.20
  -8  -6  -9   -1.20    1.30
  -8   6  -9    1.20    1.30
  -9  -6  -9   13.30    2.70
  -9   6  -9   12.60    2.40
  -9  -7   9    8.40    2.20
  -8  -7   9   34.60    3.90
  -8   7   9   37.40    2.40
  -7  -7   9    0.00    1.30
  -7   7   9    1.00    0.70
  -6  -7   9  106.19    5.80
  -6   7   9  109.89    4.10
  -5  -7   9   54.39    4.00
  -5   7   9   53.59    2.50
   5   7  -9   52.09    3.20
   5   7  -9   51.19    2.90
  -4  -7   9  144.29    6.80
  -4   7   9  147.39    5.20
   4   7  -9  140.09    6.10
   4   7  -9  165.78    6.00
  -3  -7   9   95.29    5.00
   3   7  -9   96.69    4.40
  -3   7   9   86.69    3.70
   3   7  -9  100.99    4.70
  -2  -7   9    4.60    1.40
   2   7  -9    5.20    1.40
  -2   7   9    4.90    1.00
   2   7  -9    8.40    1.60
   1  -7  -9    6.40    0.70
  -1  -7   9    7.60    1.60
   1   7  -9    4.30    1.40
   1   7  -9    6.40    1.50
  -1   7   9    6.00    1.10
   0  -7   9   75.69    4.20
   0  -7  -9   80.79    3.30
   0   7  -9   80.49    4.10
   0   7   9   72.49    3.60
   1  -7   9   82.69    4.40
  -1   7  -9   88.49    4.40
   2  -7   9   52.89    3.40
  -2  -7  -9   54.39    3.00
  -2   7  -9   51.99    3.30
   2   7   9   48.10    3.00
   3  -7   9   37.50    2.90
  -3  -7  -9   29.70    2.40
  -3   7  -9   27.10    2.80
   3   7   9   27.70    2.60
   4  -7   9  100.09    4.80
  -4  -7  -9   89.79    4.50
   4   7   9   95.89    4.60
  -4   7  -9   94.39    4.80
  -5  -7  -9   21.60    2.50
  -5   7  -9   25.00    2.90
   5   7   9   18.20    2.30
  -6  -7  -9   19.90    2.60
  -6   7  -9   17.70    2.50
   6   7   9   17.50    2.30
  -7  -7  -9   24.90    3.00
   7   7   9   24.80    2.70
  -7   7  -9   26.00    3.10
  -8  -7  -9   43.00    3.80
  -8   7  -9   43.00    4.10
  -9  -7  -9   -0.70    1.40
  -9   7  -9    0.50    1.40
  -9  -8   9   30.50    3.80
  -8  -8   9    2.80    1.80
  -7  -8   9   24.90    3.30
  -7   8   9   32.90    2.00
  -6  -8   9    3.10    1.60
  -6   8   9    2.60    0.80
  -5  -8   9  109.59    5.90
   5   8  -9  117.59    5.20
   5   8  -9  112.99    4.80
  -5   8   9  105.89    4.10
  -4  -8   9   47.70    3.70
   4   8  -9   39.90    2.80
   4   8  -9   42.60    3.10
  -4   8   9   40.00    2.20
  -3  -8   9   10.40    2.10
  -3   8   9    9.40    1.20
   3   8  -9    8.80    1.80
   3   8  -9   11.10    1.70
  -2  -8   9   28.90    3.10
   2   8  -9   15.30    2.10
   2   8  -9   21.10    2.40
  -2   8   9   20.30    1.70
  -1  -8   9   67.69    4.00
   1   8  -9   62.69    3.80
  -1   8   9   62.49    3.10
   1   8  -9   52.89    3.40
   0  -8  -9   20.20    1.50
   0  -8   9   17.70    2.30
   0   8   9   21.80    2.10
   0   8  -9   18.20    2.30
   0   8  -9   21.80    2.40
   1  -8   9  120.89    5.50
  -1   8  -9  110.29    5.30
   1   8   9  122.69    5.00
   2  -8   9   15.90    2.30
  -2  -8  -9   13.00    1.70
  -2   8  -9   15.20    2.10
   2   8   9   16.20    2.00
  -3  -8  -9   80.19    4.00
   3  -8   9   88.09    4.50
  -3   8  -9   86.59    4.60
   3   8   9   89.99    4.30
   4  -8   9    6.80    1.60
  -4  -8  -9    5.40    1.40
   4   8   9    9.50    1.80
  -4   8  -9    3.70    1.40
  -5  -8  -9  142.39    6.10
   5   8   9  127.89    5.90
  -5   8  -9  129.09    6.10
  -6  -8  -9    3.50    1.50
  -6   8  -9    4.00    1.60
   6   8   9    3.50    1.50
  -7  -8  -9    4.10    1.60
  -7   8  -9    1.70    1.40
   7   8   9    0.80    1.20
  -8  -8  -9    0.80    1.50
  -8   8  -9    0.80    1.40
  -9  -9   9    0.20    1.60
  -8  -9   9   18.90    3.00
  -7  -9   9    0.50    1.40
  -6  -9   9  128.79    6.60
  -6   9   9  115.89    4.20
  -5  -9   9   14.30    2.50
   5   9  -9   10.80    1.90
   5   9  -9   12.10    1.80
  -5   9   9    9.70    1.20
  -4  -9   9  173.58    7.90
   4   9  -9  188.18    7.10
  -4   9   9  181.78    6.10
   4   9  -9  189.98    7.50
  -3  -9   9    1.70    1.30
  -3   9   9    0.20    0.60
   3   9  -9    0.30    1.00
   3   9  -9    0.20    0.90
  -2  -9   9    3.60    1.50
  -2   9   9    4.30    1.00
   2   9  -9    2.20    1.10
   2   9  -9    3.30    1.30
  -1  -9   9    8.20    1.80
   1   9  -9    5.10    1.50
   1   9  -9    3.00    1.20
  -1   9   9    5.00    1.10
   0  -9  -9   86.29    3.50
   0  -9   9   93.69    4.90
   0   9   9   89.99    4.10
   0   9  -9   95.59    5.00
   0   9  -9   97.39    4.80
   1  -9   9   23.30    2.70
  -1  -9  -9   24.30    1.80
  -1   9  -9   23.90    2.60
   1   9   9   21.70    2.20
   2  -9   9    3.50    1.30
  -2  -9  -9    3.60    1.10
  -2   9  -9    4.20    1.40
   2   9   9    3.10    1.10
   4  -9   9  354.46   11.70
  -4  -9  -9  342.97   11.70
  -4   9  -9  342.77   12.20
   4   9   9  358.26   11.90
  -5  -9  -9    4.40    1.40
   5   9   9    2.80    1.40
  -5   9  -9    4.40    1.50
  -6  -9  -9   53.19    3.80
   6   9   9   47.00    3.60
  -6   9  -9   52.29    3.80
  -7  -9  -9   12.70    2.40
  -7   9  -9   11.60    2.30
   7   9   9   13.40    2.30
  -8  -9  -9   56.29    4.30
  -8   9  -9   55.09    4.20
   8   9   9   55.89    4.20
  -8 -10   9   -0.40    1.50
  -7 -10   9    1.20    1.50
  -6 -10   9   16.30    2.80
  -6  10   9   17.20    1.40
  -5 -10   9  214.58    9.20
   5  10  -9  225.68    8.70
  -5  10   9  228.98    7.10
   5  10  -9  211.48    8.10
  -4 -10   9   42.40    3.70
   4  10  -9   51.19    3.30
   4  10  -9   46.30    3.50
  -4  10   9   46.90    2.40
  -3 -10   9    7.40    2.00
   3  10  -9    5.60    1.40
   3  10  -9    6.50    1.70
  -3  10   9    7.80    1.20
  -2 -10   9   68.19    4.40
   2  10  -9   67.29    3.90
   2  10  -9   71.89    4.30
  -2  10   9   67.69    3.30
  -1 -10   9  123.59    6.00
   1  10  -9  121.19    5.70
   1  10  -9  132.59    6.10
  -1  10   9  132.59    5.10
   0 -10   9   22.40    2.70
   0  10  -9   16.80    2.30
   0  10   9   19.30    2.00
   0  10  -9   16.20    2.30
  -1 -10  -9    8.30    1.20
   1 -10   9    8.00    1.70
   1  10   9    6.50    1.40
  -1  10  -9    9.90    1.90
  -1  10  -9    7.00    1.70
  -2 -10  -9   47.80    2.80
   2 -10   9   46.60    3.40
   2  10   9   50.19    3.20
  -2  10  -9   47.90    3.40
   3 -10   9  130.19    5.80
  -3 -10  -9  135.79    5.50
  -3  10  -9  119.59    5.90
   3  10   9  131.79    5.70
  -4 -10  -9    3.50    1.30
  -4  10  -9    3.50    1.40
   4  10   9    4.20    1.60
  -5 -10  -9   63.59    3.90
   5  10   9   54.69    3.80
  -5  10  -9   59.19    4.00
  -6 -10  -9    6.90    1.80
   6  10   9    6.30    1.80
  -6  10  -9    7.10    1.90
  -7 -10  -9   10.10    2.20
  -7  10  -9    3.70    1.60
   7  10   9    6.40    1.80
  -8 -10  -9    1.50    1.70
  -8  10  -9    3.60    1.70
   8  10   9    3.30    1.60
  -8 -11   9   29.20    3.80
  -7 -11   9    0.40    1.40
  -6 -11   9  119.49    6.60
  -6  11   9  119.09    4.20
  -5 -11   9    1.70    1.60
  -5  11   9    5.60    1.00
   5  11  -9    7.60    1.80
   5  11  -9    3.70    1.30
  -4 -11   9    1.90    1.50
   4  11  -9    0.40    1.00
   4  11  -9   -0.10    1.10
  -4  11   9    1.50    0.80
  -3 -11   9    4.30    1.70
  -3  11   9    4.10    1.00
   3  11  -9    6.00    1.60
   3  11  -9    6.70    1.80
  -2 -11   9   98.89    5.40
  -2  11   9   99.39    4.20
   2  11  -9  101.59    5.00
   2  11  -9   92.49    5.20
  -1 -11   9    0.20    1.10
  -1  11   9    1.20    0.90
   1  11  -9    1.90    1.20
   1  11  -9    0.60    1.10
   0 -11   9    4.50    1.50
   0  11   9    2.40    1.10
   0  11  -9    4.10    1.40
   0  11  -9    3.40    1.30
   1 -11   9    5.90    1.60
  -1  11  -9    8.50    1.90
   1  11   9    9.10    1.60
  -1  11  -9    9.60    1.90
   2 -11   9   73.69    4.10
  -2 -11  -9   68.39    3.50
  -2  11  -9   69.49    4.50
   2  11   9   59.39    3.70
  -2  11  -9   63.09    4.10
   3 -11   9   72.79    4.10
  -3 -11  -9   71.99    3.80
   3  11   9   73.49    4.10
  -3  11  -9   73.79    4.40
  -4 -11  -9   90.29    4.50
   4  11   9   80.59    4.50
  -4  11  -9   86.79    4.90
  -5 -11  -9    6.80    1.80
   5  11   9   11.30    2.10
  -5  11  -9   10.80    2.20
  -6 -11  -9   38.30    3.40
  -6  11  -9   39.60    4.00
   6  11   9   39.20    3.80
  -7 -11  -9   -0.10    1.30
   7  11   9   -0.20    1.20
  -7  11  -9   -0.40    1.30
  -8 -11  -9   15.80    2.80
  -8  11  -9   18.00    3.00
   8  11   9   18.30    2.70
  -8 -12   9   -0.30    1.50
  -7 -12   9    4.50    2.00
  -6 -12   9    1.20    1.50
  -6  12   9    0.60    0.60
  -5 -12   9   31.50    3.80
   5  12  -9   26.90    2.80
  -5  12   9   28.30    1.90
  -4 -12   9   12.80    2.40
  -4  12   9   11.90    1.40
   4  12  -9    8.70    2.00
   4  12  -9    7.80    1.70
  -3 -12   9    0.90    1.40
   3  12  -9    3.70    1.40
   3  12  -9    4.20    1.60
  -3  12   9    3.40    0.90
  -2 -12   9   29.40    3.40
  -2  12   9   30.80    2.30
   2  12  -9   31.40    3.20
   2  12  -9   31.30    3.40
  -1 -12   9  258.67    9.80
   1  12  -9  235.78    9.50
   1  12  -9  260.07   10.10
  -1  12   9  255.37    8.70
   0 -12   9    9.10    2.00
   0  12  -9    6.90    2.00
   0  12   9   10.10    1.60
   0  12  -9   10.30    2.00
   1 -12   9  164.78    6.90
  -1  12  -9  150.58    6.90
   1  12   9  154.48    6.30
  -1  12  -9  153.98    7.20
   2 -12   9   14.70    2.20
   2  12   9   13.20    2.00
  -2  12  -9   11.10    2.10
  -2  12  -9   15.60    2.60
  -3 -12  -9  119.39    5.20
  -3  12  -9  116.39    6.40
  -3  12  -9  118.19    5.90
   3  12   9  112.69    5.40
  -4 -12  -9   30.40    2.90
  -4  12  -9   29.90    3.50
  -4  12  -9   27.70    3.20
   4  12   9   23.10    2.80
  -5 -12  -9    3.00    1.40
   5  12   9   -0.90    1.10
  -5  12  -9    2.70    1.50
  -6 -12  -9   -0.10    1.30
   6  12   9    0.60    1.40
  -6  12  -9    0.70    1.40
  -7 -12  -9   11.30    2.40
   7  12   9   17.60    2.70
  -7  12  -9   11.00    2.30
  -7 -13   9    0.60    1.60
  -6 -13   9    3.20    1.80
  -5 -13   9   -0.40    1.30
   5  13  -9    0.60    1.10
  -5  13   9    0.50    0.70
  -4 -13   9   20.30    3.10
  -4  13   9   20.80    1.90
   4  13  -9   19.20    2.80
   4  13  -9   20.90    2.70
  -3 -13   9   19.30    2.80
   3  13  -9   16.90    2.50
   3  13  -9   22.10    2.90
  -3  13   9   20.40    2.00
  -2 -13   9   43.80    3.70
   2  13  -9   36.10    3.70
   2  13  -9   34.80    3.50
  -2  13   9   38.10    2.60
  -1 -13   9   78.59    4.70
   1  13  -9   68.19    4.60
  -1  13   9   73.09    3.80
   1  13  -9   74.19    4.50
   0 -13   9  160.58    7.00
   0  13  -9  155.08    7.40
   0  13   9  152.18    6.20
   0  13  -9  147.29    6.90
   1 -13   9   -1.40    1.00
  -1  13  -9    1.60    1.20
   1  13   9   -0.90    1.00
  -1  13  -9   -1.10    1.10
   2 -13   9   27.30    2.80
  -2  13  -9   20.00    2.80
   2  13   9   22.90    2.70
  -2  13  -9   19.90    2.90
  -3  13  -9   37.60    4.10
  -3  13  -9   29.60    3.20
   3  13   9   28.80    3.00
  -4 -13  -9   88.79    4.50
   4  13   9   85.69    4.80
  -4  13  -9   84.19    5.40
  -4  13  -9   80.79    5.00
  -5 -13  -9   43.70    3.40
   5  13   9   46.50    3.60
  -5  13  -9   44.60    4.50
  -5  13  -9   45.90    3.80
  -6 -13  -9   19.00    2.70
   6  13   9   21.00    2.90
  -6  13  -9   19.50    2.90
  -7 -13  -9    3.80    1.70
  -7  13  -9    2.90    1.70
   7  13   9    1.20    1.50
  -7 -14   9   17.80    3.20
  -6 -14   9   14.10    2.80
  -5 -14   9    0.70    1.50
  -5  14   9   -0.30    0.70
   5  14  -9    0.00    1.10
  -4 -14   9    3.90    1.80
  -4  14   9    2.80    1.00
   4  14  -9    5.20    1.60
   4  14  -9    2.50    1.50
  -3 -14   9   68.59    4.70
   3  14  -9   61.29    4.30
   3  14  -9   66.79    4.70
  -3  14   9   68.59    3.40
  -2 -14   9   44.20    3.80
   2  14  -9   41.00    3.50
  -2  14   9   36.10    2.70
   2  14  -9   42.40    4.20
  -1 -14   9   36.80    3.60
   1  14  -9   45.70    4.40
   1  14  -9   36.70    3.80
  -1  14   9   34.70    2.70
   0 -14   9   23.80    2.80
   0  14   9   15.60    2.10
   0  14  -9   16.30    2.70
   0  14  -9   16.50    2.50
   1 -14   9  132.89    6.20
   1  14   9  137.39    5.90
  -1  14  -9  132.09    6.50
  -1  14  -9  127.09    6.80
   2  14   9   -0.70    1.10
  -2  14  -9   -1.50    1.00
  -2  14  -9    0.30    1.20
   3  14   9    6.20    1.70
  -3  14  -9    6.90    2.00
  -3  14  -9    7.70    2.20
  -4  14  -9    5.10    1.90
  -4  14  -9    8.20    2.10
   4  14   9    5.50    1.70
  -5 -14  -9   31.40    3.20
   5  14   9   38.10    3.70
  -5  14  -9   38.40    3.90
  -6 -14  -9   -0.50    1.20
  -6  14  -9    1.40    1.50
   6  14   9    1.30    1.50
  -6 -15   9    7.00    2.20
  -5 -15   9    4.20    2.10
   5  15  -9    2.90    1.50
  -5  15   9    2.40    0.90
  -4 -15   9   59.59    4.60
  -4  15   9   60.69    3.10
   4  15  -9   58.79    4.20
   4  15  -9   57.29    4.40
  -3 -15   9   12.00    2.40
   3  15  -9   18.50    2.70
  -3  15   9   17.40    2.00
   3  15  -9   18.30    2.90
  -2 -15   9   15.30    2.60
   2  15  -9   13.70    2.40
   2  15  -9   14.20    2.70
  -2  15   9   10.10    1.70
  -1 -15   9   18.90    2.70
   1  15  -9   21.50    3.10
  -1  15   9   22.10    2.40
   1  15  -9   20.20    2.80
   0 -15   9   15.20    2.30
   0  15   9   17.40    2.20
   0  15  -9   14.00    2.60
   0  15  -9   10.20    2.20
  -1  15  -9    8.90    2.30
  -1  15  -9    6.90    1.90
   1  15   9    4.90    1.50
   2  15   9   48.90    3.60
  -2  15  -9   47.20    4.70
  -2  15  -9   48.80    3.90
  -3  15  -9    4.00    1.70
   3  15   9    8.40    2.00
  -3  15  -9    5.60    1.80
  -4  15  -9   13.80    2.60
   4  15   9   11.30    2.30
  -5  15  -9   10.20    2.30
   5  15   9    9.70    2.20
   6  15   9   11.10    2.40
  -6  15  -9    7.60    2.20
  -6 -16   9   -1.50    1.40
  -5 -16   9    9.50    2.40
  -5  16   9   11.50    1.60
   5  16  -9   13.50    2.50
  -4 -16   9   10.30    2.50
   4  16  -9    9.00    2.30
   4  16  -9   10.40    2.30
  -4  16   9   10.70    1.60
  -3 -16   9   66.79    4.70
  -3  16   9   70.69    3.70
   3  16  -9   68.79    4.60
   3  16  -9   69.69    5.00
  -2 -16   9    7.60    2.00
   2  16  -9    4.80    1.90
   2  16  -9    6.20    1.90
  -2  16   9    5.40    1.40
  -1 -16   9    1.60    1.30
   1  16  -9   -0.30    1.40
   1  16  -9    0.90    1.40
  -1  16   9    0.40    1.00
   0 -16   9    3.40    1.60
   0  16  -9    3.90    1.90
   0  16   9    2.10    1.20
   0  16  -9    2.80    1.60
  -1  16  -9   99.19    5.80
   1  16   9  115.29    5.40
  -1  16  -9  103.79    6.30
   2  16   9    1.60    1.30
  -2  16  -9    2.00    1.70
  -2  16  -9    2.90    1.70
  -3  16  -9    1.90    1.60
   3  16   9    1.50    1.30
  -4  16  -9    8.20    2.20
   4  16   9    6.80    1.90
  -5  16  -9   45.00    4.50
   5  16   9   57.09    4.30
  -5 -17   9   -1.60    1.40
   5  17  -9    0.10    1.30
  -5  17   9    0.70    0.90
  -4 -17   9   37.10    4.10
  -4  17   9   38.20    2.80
   4  17  -9   44.90    4.30
  -3 -17   9   11.80    2.50
   3  17  -9    7.10    2.10
  -3  17   9   11.60    1.80
  -2 -17   9   39.90    4.00
   2  17  -9   35.60    3.90
  -2  17   9   40.50    3.00
  -1 -17   9    1.20    1.30
   1  17  -9    0.10    1.30
  -1  17   9   -0.50    1.00
   0  17   9    4.40    1.60
   0  17  -9    6.40    2.00
  -1  17  -9    0.70    1.40
   1  17   9    2.20    1.30
   2  17   9   14.90    2.30
  -2  17  -9   17.50    2.90
  -3  17  -9    7.60    2.20
   3  17   9    8.50    2.10
  -4  17  -9    1.70    1.60
   4  17   9    2.40    1.50
   5  17   9    0.20    1.50
  -5  17  -9   -0.20    1.40
  -4 -18   9    2.00    1.80
   4  18  -9   -1.20    1.40
  -4  18   9   -0.20    1.10
  -3 -18   9   92.19    5.70
  -3  18   9   98.39    4.80
   3  18  -9   96.09    5.80
  -2 -18   9   17.80    2.80
   2  18  -9   14.40    2.80
  -2  18   9   16.00    2.20
  -1  18   9    4.30    1.50
   1  18  -9    5.00    1.90
   0  18   9    2.40    1.30
   0  18  -9   -1.40    1.30
   1  18   9   18.60    2.60
  -1  18  -9   16.70    3.00
  -2  18  -9    0.10    1.50
   2  18   9    0.70    1.30
   3  18   9    3.20    1.60
  -3  18  -9    3.30    1.70
   4  18   9    0.10    1.20
  -4  18  -9    1.10    1.70
   3  19  -9    0.40    1.70
  -3  19   9   -0.50    1.10
  -2  19   9    5.00    1.50
   2  19  -9    5.40    2.10
   1  19  -9   -1.10    1.30
  -1  19   9   -0.50    1.10
   0  19  -9   14.60    2.90
   0  19   9   14.40    2.40
  -1  19  -9    7.40    2.30
   1  19   9    7.80    2.00
   2  19   9    5.10    1.80
  -2  19  -9    7.60    2.30
  -9   0  10   -0.10    1.20
  -8   0  10   73.49    4.50
  -7   0  10    0.70    1.20
  -6   0  10  191.18    7.60
   5   0 -10   -0.10    0.50
  -5   0  10   -0.10    0.90
   3   0 -10    0.50    0.50
  -3   0  10    1.30    1.10
  -2   0  10   55.19    3.40
   2   0 -10   68.39    3.00
   1   0 -10   -0.10    0.40
  -1   0  10    0.30    0.30
   0   0 -10  956.60   27.10
   0   0  10  928.71   27.40
   1   0  10   -0.10    0.80
  -1   0 -10   -0.60    0.70
  -2   0 -10   91.79    4.40
   2   0  10   92.49    4.50
  -3   0 -10    0.70    1.00
   3   0  10    1.10    1.00
  -4   0 -10  102.69    5.00
   4   0  10   98.29    4.90
   5   0  10    1.10    1.20
  -5   0 -10   -0.20    1.00
  -6   0 -10   63.99    4.10
   6   0  10   72.49    4.30
  -7   0 -10   -0.90    1.10
  -8   0 -10  188.18    8.20
  -9   0 -10    0.60    1.40
  -9  -1  10   14.30    2.50
  -9   1  10   12.30    2.20
  -8  -1  10    0.00    1.10
  -8   1  10    0.90    1.20
  -7  -1  10   89.09    4.90
  -7   1  10   78.99    4.50
  -6  -1  10    3.30    1.50
  -6   1  10    1.70    1.20
  -5  -1  10   44.70    3.30
  -5   1  10   42.00    3.00
   4  -1 -10    2.60    0.60
  -4  -1  10    7.10    1.60
   4   1 -10    3.70    0.90
  -4   1  10    4.50    1.30
  -3  -1  10  483.55   15.60
   3  -1 -10  487.65   14.20
   3   1 -10  498.75   14.50
  -3   1  10  508.85   15.40
   2  -1 -10   42.80    2.30
  -2  -1  10   43.20    3.00
   2   1 -10   43.20    2.50
  -2   1  10   38.90    2.70
   1  -1 -10  365.66   11.40
   1   1 -10  373.96   11.70
   0  -1 -10   -0.10    0.80
   0  -1  10    0.00    1.00
   0   1 -10   -0.10    0.80
   0   1  10    0.20    0.30
  -1  -1 -10   44.90    2.90
   1  -1  10   46.70    3.10
   1   1  10   47.70    3.00
  -1   1 -10   44.40    2.90
   2  -1  10   24.50    2.50
  -2  -1 -10   25.20    2.40
  -2   1 -10   28.60    2.70
   2   1  10   27.50    2.40
   3  -1  10  213.18    8.00
  -3  -1 -10  204.98    7.70
  -3   1 -10  199.08    7.80
   3   1  10  209.08    7.90
  -4  -1 -10   26.60    2.70
   4  -1  10   26.50    2.80
   4   1  10   21.20    2.50
  -4   1 -10   29.50    2.90
   5  -1  10  165.98    6.90
  -5  -1 -10  155.58    6.80
   5   1  10  161.68    6.80
  -5   1 -10  164.18    6.90
   6  -1  10    6.20    1.70
  -6  -1 -10    8.00    1.80
   6   1  10   10.50    2.00
  -6   1 -10    8.80    1.90
  -7  -1 -10   46.90    3.60
  -7   1 -10   40.90    3.50
  -8  -1 -10   -0.60    1.30
  -8   1 -10    1.70    1.40
  -9  -1 -10   34.90    3.90
  -9   1 -10   45.10    4.30
  -9  -2  10   -0.10    1.40
  -9   2  10    0.00    1.10
  -8  -2  10   10.70    2.20
  -8   2  10    4.60    1.50
  -7  -2  10    3.70    1.50
  -7   2  10    1.70    1.20
  -6  -2  10  301.37   10.90
  -6   2  10  293.97   10.20
  -5  -2  10   12.10    2.10
   5   2 -10   13.20    1.50
  -5   2  10   14.10    1.90
  -4  -2  10  135.09    5.90
   4  -2 -10  125.59    4.50
  -4   2  10  129.49    5.40
   4   2 -10  131.79    5.00
  -3  -2  10   26.00    2.70
   3   2 -10   23.90    2.00
  -3   2  10   23.10    2.30
   3   2 -10   23.50    1.80
   2  -2 -10   78.09    3.20
  -2   2  10   82.59    3.90
  -1  -2  10    0.70    0.70
   1  -2 -10    0.70    0.70
  -1   2  10    0.40    0.90
   1   2 -10    1.20    0.90
   0  -2  10  117.39    5.20
   0  -2 -10  111.49    4.60
   0   2 -10  105.39    4.70
  -1  -2 -10  290.27    9.70
   1  -2  10  294.17   10.20
  -1   2 -10  298.37   10.00
   1   2  10  285.67    9.90
   2  -2  10   43.70    3.10
  -2  -2 -10   45.80    2.90
   2   2  10   41.50    2.90
  -2   2 -10   42.00    3.00
  -3  -2 -10  465.55   14.90
   3  -2  10  470.15   15.20
  -3   2 -10  481.25   15.10
   3   2  10  463.65   14.90
   4  -2  10   50.19    3.40
  -4  -2 -10   46.80    3.30
  -4   2 -10   52.49    3.50
   4   2  10   56.69    3.50
   5  -2  10   28.10    3.00
  -5  -2 -10   32.90    3.20
  -5   2 -10   35.90    3.00
   5   2  10   38.60    3.00
  -6  -2 -10  181.18    7.60
   6  -2  10  172.38    7.40
  -6   2 -10  183.28    7.70
   6   2  10  195.08    7.70
  -7  -2 -10    6.60    1.90
  -7   2 -10    5.50    1.70
   7   2  10    4.80    1.60
  -8  -2 -10   53.89    4.10
  -8   2 -10   53.79    4.10
  -9  -2 -10    0.40    1.30
  -9   2 -10    3.50    1.70
  -9  -3  10    6.60    2.00
  -9   3  10    6.30    1.60
  -8  -3  10   10.70    2.30
  -8   3  10   10.30    1.80
  -7  -3  10    1.60    1.30
  -7   3  10    0.50    1.00
  -6  -3  10    2.20    1.40
  -6   3  10    3.40    1.20
  -5  -3  10  182.98    7.70
   5   3 -10  186.98    6.50
  -5   3  10  184.08    6.90
  -4  -3  10   82.39    4.60
   4   3 -10   82.99    3.70
  -4   3  10   78.69    3.80
   4   3 -10   79.39    3.80
  -3  -3  10   44.00    3.30
   3   3 -10   45.20    2.80
   3   3 -10   39.30    2.40
  -3   3  10   44.80    2.70
   2  -3 -10  132.89    4.60
   2   3 -10  132.19    5.30
  -2   3  10  149.49    5.60
  -1  -3  10  528.15   17.00
   1  -3 -10  556.14   15.80
  -1   3  10  549.05   16.40
   1   3 -10  525.75   16.40
   0  -3  10   20.00    2.40
   0   3 -10   25.90    2.50
  -1  -3 -10   16.60    1.90
   1  -3  10   16.10    2.20
   1   3  10   14.80    1.90
  -1   3 -10   15.70    2.00
   2  -3  10   74.79    4.20
  -2  -3 -10   93.59    4.20
  -2   3 -10   77.29    4.20
   2   3  10   74.99    4.00
  -3  -3 -10  402.36   13.00
   3  -3  10  390.96   13.20
  -3   3 -10  401.76   13.20
   3   3  10  398.56   13.00
  -4  -3 -10   20.10    2.40
   4  -3  10   17.40    2.30
  -4   3 -10   14.30    2.10
   4   3  10   16.70    2.20
  -5  -3 -10    9.60    1.90
   5  -3  10    9.60    1.90
   5   3  10    5.30    1.50
  -5   3 -10    7.60    1.80
  -6  -3 -10   71.99    4.40
   6  -3  10   77.29    4.60
   6   3  10   77.69    4.40
  -6   3 -10   75.49    4.50
  -7  -3 -10   10.80    2.10
   7   3  10   10.20    2.00
  -7   3 -10   13.20    2.40
  -8  -3 -10    2.80    1.60
  -8   3 -10    3.20    1.70
  -9  -3 -10   64.69    4.80
  -9   3 -10   68.69    4.80
  -9  -4  10    3.90    1.80
  -9   4  10    7.10    1.70
  -8  -4  10    1.80    1.50
  -8   4  10    2.20    1.20
  -7  -4  10    0.80    1.30
  -7   4  10    0.60    1.00
  -6  -4  10   50.49    3.80
  -6   4  10   50.09    3.10
  -5  -4  10   -0.50    1.10
  -5   4  10    0.20    0.90
   5   4 -10    1.20    0.80
  -4  -4  10   47.40    3.60
  -4   4  10   45.10    2.80
   4   4 -10   45.10    2.80
   4   4 -10   50.49    2.60
  -3  -4  10    3.30    1.30
   3   4 -10    5.00    1.10
  -3   4  10    2.90    1.00
   3   4 -10    4.60    1.20
  -2  -4  10   24.30    2.80
   2   4 -10   23.70    2.30
  -2   4  10   27.40    2.10
   1  -4 -10   45.60    2.30
  -1  -4  10   43.90    3.20
  -1   4  10   42.80    2.70
   1   4 -10   49.20    3.00
   0  -4 -10   71.79    3.40
   0   4  10   90.69    3.90
   1  -4  10   -1.60    0.80
  -1  -4 -10    0.40    0.70
   1   4  10   -0.10    0.80
  -1   4 -10   -0.20    0.80
   2  -4  10   26.60    2.70
  -2  -4 -10   30.80    2.40
   2   4  10   27.30    2.30
  -2   4 -10   25.20    2.60
   3  -4  10   16.40    2.20
  -3  -4 -10   15.70    2.10
  -3   4 -10   16.60    2.30
   3   4  10   23.70    2.50
   4  -4  10   94.29    4.80
  -4  -4 -10   83.39    4.50
  -4   4 -10   89.99    4.70
   4   4  10   86.99    4.50
  -5  -4 -10   11.80    2.00
   5  -4  10   10.90    2.00
  -5   4 -10   16.80    2.40
   5   4  10   10.50    2.00
  -6  -4 -10   28.60    3.10
  -6   4 -10   32.90    3.30
   6   4  10   29.30    3.00
  -7  -4 -10    1.30    1.30
   7   4  10    2.20    1.40
  -7   4 -10    1.40    1.30
  -8  -4 -10   23.20    3.20
  -8   4 -10   15.10    2.60
  -9  -4 -10    0.50    1.60
  -9   4 -10    0.80    1.50
  -9  -5  10   11.10    2.50
  -9   5  10    8.90    1.70
  -8  -5  10    5.00    1.90
  -8   5  10    4.90    1.30
  -7  -5  10    0.30    1.40
  -7   5  10    1.70    1.00
  -6  -5  10    2.20    1.50
  -6   5  10    3.20    1.10
  -5  -5  10  111.89    5.80
   5   5 -10  108.69    4.80
  -5   5  10  117.19    4.70
  -4  -5  10   69.29    4.30
   4   5 -10   57.29    3.30
  -4   5  10   60.49    3.10
  -3  -5  10   26.90    3.00
  -3   5  10   23.80    1.90
   3   5 -10   21.10    2.10
   3   5 -10   21.50    2.20
  -2  -5  10   87.79    4.70
   2   5 -10   79.59    4.00
  -2   5  10   84.19    3.80
   2   5 -10   79.79    4.20
  -1  -5  10  309.47   10.80
   1  -5 -10  299.37    9.10
   1   5 -10  297.47   10.20
  -1   5  10  294.57    9.80
   0  -5 -10    6.40    1.10
   0  -5  10    4.60    1.50
   0   5  10    5.00    1.30
   0   5 -10    5.00    1.40
  -1  -5 -10  167.08    6.20
   1  -5  10  165.58    6.90
   1   5  10  161.68    6.30
  -1   5 -10  166.98    6.70
  -2  -5 -10   -0.30    0.80
   2  -5  10   -1.70    0.90
   2   5  10    0.70    1.00
  -2   5 -10    0.00    0.90
  -3  -5 -10   78.09    4.00
   3  -5  10   80.19    4.40
  -3   5 -10   80.19    4.30
   3   5  10   69.99    4.00
  -4  -5 -10    3.80    1.30
   4  -5  10    3.00    1.30
   4   5  10    3.00    1.30
  -4   5 -10    2.90    1.40
   5  -5  10   20.20    2.50
  -5  -5 -10   18.80    2.40
   5   5  10   20.70    2.50
  -5   5 -10   20.00    2.60
  -6  -5 -10    2.80    1.40
  -6   5 -10    2.40    1.40
   6   5  10    1.60    1.30
  -7  -5 -10    0.10    1.20
   7   5  10    0.60    1.10
  -7   5 -10    0.90    1.40
  -8  -5 -10    6.90    2.10
  -8   5 -10    7.00    2.00
  -9  -6  10    2.50    1.80
  -8  -6  10   12.20    2.40
  -8   6  10   10.20    1.60
  -7  -6  10    0.70    1.50
  -7   6  10    1.80    0.90
  -6  -6  10   25.80    3.30
  -6   6  10   27.80    2.10
  -5  -6  10   -0.40    1.20
  -5   6  10    1.10    0.80
   5   6 -10    0.70    1.00
  -4  -6  10  109.19    5.70
   4   6 -10  112.59    4.70
  -4   6  10  114.89    4.50
   4   6 -10  106.89    5.00
  -3  -6  10    0.00    1.10
   3   6 -10    1.80    1.10
  -3   6  10    0.40    0.70
   3   6 -10    1.40    0.90
  -2  -6  10   11.20    2.10
  -2   6  10    6.30    1.20
   2   6 -10    7.80    1.60
   2   6 -10    3.90    1.30
   1  -6 -10   82.69    3.10
  -1  -6  10   70.99    4.40
  -1   6  10   78.09    3.70
   1   6 -10   79.99    4.10
   0  -6  10  209.58    8.10
   0  -6 -10  195.78    6.80
   0   6  10  198.38    7.20
   0   6 -10  196.68    7.60
   1  -6  10  181.88    7.40
  -1  -6 -10  171.38    6.40
   1   6  10  184.98    6.80
  -1   6 -10  171.58    7.10
  -2  -6 -10   69.09    3.50
   2  -6  10   67.39    4.00
  -2   6 -10   60.69    3.80
   2   6  10   61.99    3.60
   3  -6  10   18.30    2.40
  -3  -6 -10   17.70    2.20
   3   6  10   18.60    2.30
  -3   6 -10   18.30    2.50
  -4  -6 -10  500.65   16.30
   4  -6  10  512.75   16.60
  -4   6 -10  532.95   16.80
   4   6  10  519.35   16.40
  -5  -6 -10  135.09    6.10
   5  -6  10  132.19    6.00
  -5   6 -10  127.99    6.20
   5   6  10  140.89    6.10
  -6  -6 -10    2.90    1.40
  -6   6 -10    4.80    1.70
   6   6  10    2.70    1.40
  -7  -6 -10    0.00    1.30
   7   6  10    0.20    1.10
  -7   6 -10    0.20    1.20
  -8  -6 -10    5.10    1.80
  -8   6 -10    3.60    1.70
  -9  -7  10   18.50    3.20
  -8  -7  10    0.50    1.50
  -8   7  10    0.90    0.90
  -7  -7  10    5.80    1.90
  -7   7  10    9.90    1.40
  -6  -7  10   27.60    3.40
  -6   7  10   26.10    2.00
  -5  -7  10   63.09    4.50
   5   7 -10   65.39    3.70
  -5   7  10   61.69    3.10
  -4  -7  10   19.60    2.70
   4   7 -10   19.20    2.10
  -4   7  10   21.90    1.80
   4   7 -10   18.70    2.30
  -3  -7  10    3.00    1.40
  -3   7  10    4.10    1.00
   3   7 -10    6.10    1.40
   3   7 -10    4.50    1.30
  -2  -7  10    5.90    1.70
   2   7 -10    6.30    1.50
  -2   7  10    3.60    1.00
   2   7 -10    5.90    1.50
  -1  -7  10  174.98    7.50
   1   7 -10  179.08    7.10
   1   7 -10  182.88    7.40
  -1   7  10  177.68    6.50
   0  -7 -10   69.59    3.20
   0  -7  10   65.19    4.20
   0   7 -10   77.89    4.20
   0   7  10   79.49    3.70
  -1  -7 -10  185.78    6.70
   1  -7  10  189.88    7.70
  -1   7 -10  187.78    7.50
   1   7  10  187.78    7.00
   2  -7  10    0.10    1.10
  -2  -7 -10    1.00    0.90
   2   7  10    0.00    0.90
  -2   7 -10   -0.30    1.00
   3  -7  10  157.88    6.90
  -3  -7 -10  173.48    6.60
   3   7  10  164.28    6.60
  -3   7 -10  159.88    7.00
  -4  -7 -10   23.00    2.60
   4  -7  10   23.30    2.70
   4   7  10   23.70    2.70
  -4   7 -10   21.50    2.80
  -5  -7 -10    9.00    1.90
  -5   7 -10   12.40    2.30
   5   7  10    9.60    2.00
  -6  -7 -10    0.10    1.10
  -6   7 -10    0.10    1.20
   6   7  10    1.80    1.30
  -7  -7 -10   21.60    2.90
   7   7  10   24.30    3.00
  -7   7 -10   28.50    3.30
  -8  -7 -10   14.40    2.60
  -8   7 -10   15.90    2.70
  -8  -8  10   65.99    5.00
  -7  -8  10   -0.10    1.40
  -7   8  10   -0.10    0.70
  -6  -8  10   32.00    3.70
  -6   8  10   26.70    2.00
  -5  -8  10    1.60    1.50
   5   8 -10    1.50    1.10
  -5   8  10    0.70    0.70
  -4  -8  10    9.90    2.20
  -4   8  10   11.80    1.50
   4   8 -10    9.00    1.80
   4   8 -10   12.70    1.90
  -3  -8  10   -0.20    1.20
   3   8 -10    2.00    1.10
  -3   8  10    2.40    0.90
   3   8 -10   -1.60    0.80
  -2  -8  10    6.40    1.70
   2   8 -10    8.80    1.70
  -2   8  10    5.40    1.20
   2   8 -10    7.30    1.60
  -1  -8  10   32.30    3.40
  -1   8  10   31.00    2.30
   1   8 -10   34.10    3.00
   1   8 -10   29.60    3.00
   0  -8  10   50.99    3.70
   0   8  10   51.59    3.00
   0   8 -10   53.79    3.80
   0   8 -10   52.29    3.50
   1  -8  10   -0.20    1.10
  -1  -8 -10    0.20    0.30
  -1   8 -10    0.10    0.90
   1   8  10    2.90    1.10
   2  -8  10  222.28    8.50
  -2  -8 -10  209.78    7.60
   2   8  10  210.08    7.90
  -2   8 -10  207.98    8.30
  -3  -8 -10  101.79    4.70
   3  -8  10   96.79    5.10
  -3   8 -10   94.69    5.10
   3   8  10   99.99    4.80
   4  -8  10  159.58    6.90
  -4  -8 -10  167.18    6.80
  -4   8 -10  164.68    7.20
   4   8  10  168.38    6.90
  -5  -8 -10    1.40    1.30
   5   8  10    4.70    1.50
  -5   8 -10    4.30    1.60
  -6  -8 -10    1.30    1.30
  -6   8 -10    0.80    1.20
   6   8  10    0.30    1.20
  -7  -8 -10    5.40    1.80
   7   8  10    2.70    1.40
  -7   8 -10    4.20    1.80
  -8  -8 -10   30.50    3.60
  -8   8 -10   38.30    3.90
  -8  -9  10    0.00    1.60
  -7  -9  10   39.70    4.30
  -7   9  10   45.10    2.50
  -6  -9  10    0.60    1.50
  -6   9  10    0.40    0.70
  -5  -9  10   48.40    4.10
   5   9 -10   44.10    3.30
  -5   9  10   46.70    2.50
  -4  -9  10   22.80    3.10
   4   9 -10   22.40    2.50
   4   9 -10   25.90    2.80
  -4   9  10   23.10    1.90
  -3  -9  10    2.40    1.50
   3   9 -10    7.30    1.70
  -3   9  10    7.40    1.20
   3   9 -10    8.10    1.70
  -2  -9  10    2.10    1.40
  -2   9  10    4.00    1.10
   2   9 -10    4.80    1.60
   2   9 -10    4.60    1.40
  -1  -9  10  440.76   14.80
   1   9 -10  430.06   14.30
   1   9 -10  426.66   14.60
  -1   9  10  436.46   13.50
   0  -9  10   79.29    4.70
   0   9  10   83.89    4.00
   0   9 -10   86.19    4.60
   0   9 -10   82.99    4.80
   1  -9  10   28.90    3.00
   1   9  10   32.20    2.60
  -1   9 -10   42.00    3.20
  -2  -9 -10   18.30    2.10
   2  -9  10   13.90    2.20
  -2   9 -10   12.20    2.20
   2   9  10   14.00    2.00
   3  -9  10   11.00    2.00
  -3  -9 -10   11.30    1.80
  -3   9 -10   10.60    2.10
   3   9  10    9.30    1.80
  -4  -9 -10    1.60    1.20
   4   9  10    3.50    1.40
  -4   9 -10    3.20    1.50
  -5  -9 -10   43.00    3.30
  -5   9 -10   30.00    3.30
   5   9  10   36.50    3.20
  -6  -9 -10   -0.40    1.20
  -6   9 -10    2.40    1.50
   6   9  10   -0.50    1.20
  -7  -9 -10   91.89    5.40
   7   9  10  102.29    5.40
  -7   9 -10   91.99    5.50
  -8  -9 -10   13.60    2.70
  -8   9 -10    4.80    1.90
  -8 -10  10   44.80    4.60
  -7 -10  10    1.10    1.60
  -6 -10  10   54.49    4.40
  -6  10  10   50.79    2.60
  -5 -10  10   -1.00    1.30
   5  10 -10   -0.30    1.10
  -5  10  10    0.90    0.70
  -4 -10  10   86.39    5.20
   4  10 -10   78.39    4.30
   4  10 -10   70.69    4.40
  -4  10  10   74.19    3.40
  -3 -10  10   -0.10    1.20
   3  10 -10   -0.50    1.00
   3  10 -10    0.20    1.10
  -3  10  10    0.20    0.70
  -2 -10  10   56.49    4.10
  -2  10  10   51.19    3.00
   2  10 -10   54.39    3.70
   2  10 -10   56.89    3.90
  -1 -10  10   -0.70    1.10
  -1  10  10    0.60    0.90
   1  10 -10   -1.10    1.00
   1  10 -10    0.50    1.00
   0 -10  10   52.19    3.80
   0  10 -10   51.89    3.80
   0  10 -10   54.29    3.70
   0  10  10   44.40    3.00
   1 -10  10    5.90    1.70
  -1  10 -10    6.40    1.70
  -1  10 -10    9.10    2.10
   1  10  10    6.80    1.50
   2 -10  10  158.58    6.70
  -2 -10 -10  136.69    5.70
   2  10  10  136.89    6.00
  -2  10 -10  145.69    6.60
  -3 -10 -10   18.50    2.20
   3 -10  10   20.90    2.60
   3  10  10   16.40    2.30
  -3  10 -10   19.30    2.60
  -4 -10 -10  105.09    5.00
  -4  10 -10   93.19    5.30
   4  10  10  103.49    5.20
  -5 -10 -10   26.40    2.90
   5  10  10   30.80    3.20
  -5  10 -10   35.10    3.70
  -6 -10 -10    4.30    1.60
  -6  10 -10    8.00    2.00
   6  10  10    7.60    1.90
  -7 -10 -10    0.20    1.40
  -7  10 -10    0.80    1.50
   7  10  10    1.90    1.40
  -7 -11  10   49.40    4.90
  -6 -11  10    3.20    1.90
  -6  11  10    2.80    0.80
  -5 -11  10   13.70    2.70
   5  11 -10   14.50    2.40
  -5  11  10   12.10    1.50
  -4 -11  10   10.90    2.40
   4  11 -10   17.10    2.60
   4  11 -10   11.60    2.00
  -4  11  10   12.70    1.60
  -3 -11  10  147.09    7.20
   3  11 -10  147.19    6.50
   3  11 -10  141.29    6.80
  -3  11  10  145.99    5.50
  -2 -11  10   25.50    3.10
   2  11 -10   32.70    3.30
   2  11 -10   25.80    3.10
  -2  11  10   29.90    2.30
  -1 -11  10   87.19    5.00
   1  11 -10   70.69    4.60
   1  11 -10   79.49    4.60
  -1  11  10   67.79    3.70
   0 -11  10   18.40    2.70
   0  11 -10   13.10    2.50
   0  11  10   15.70    2.00
   0  11 -10   15.60    2.40
   1 -11  10   69.99    4.30
  -1  11 -10   61.09    4.10
  -1  11 -10   68.49    4.60
   1  11  10   59.29    3.60
   2 -11  10   21.30    2.70
  -2  11 -10   21.40    2.80
   2  11  10   23.80    2.70
  -2  11 -10   20.80    3.10
   3 -11  10   97.39    5.50
  -3 -11 -10  102.89    4.80
  -3  11 -10   91.19    5.30
   3  11  10  100.99    5.00
  -4 -11 -10    2.30    1.20
   4  11  10    3.10    1.40
  -4  11 -10    3.20    1.50
  -5 -11 -10   27.00    3.00
  -5  11 -10   29.30    3.50
   5  11  10   33.70    3.50
  -6 -11 -10   31.10    3.30
   6  11  10   27.50    3.20
  -6  11 -10   23.20    3.10
  -7 -11 -10  109.19    6.00
   7  11  10  118.89    6.20
  -7  11 -10  111.49    6.30
  -7 -12  10    0.90    1.70
  -6 -12  10   14.80    2.90
  -6  12  10   20.20    1.70
  -5 -12  10    0.20    1.50
   5  12 -10    1.10    1.30
  -5  12  10    0.40    0.80
  -4 -12  10   33.20    3.90
   4  12 -10   26.30    3.20
  -4  12  10   35.40    2.30
   4  12 -10   29.70    3.10
  -3 -12  10   28.20    3.50
   3  12 -10   33.30    3.40
   3  12 -10   34.20    3.60
  -3  12  10   28.00    2.20
  -2 -12  10   43.30    3.80
  -2  12  10   44.50    2.80
   2  12 -10   43.30    3.50
   2  12 -10   44.20    3.70
  -1 -12  10    1.10    1.40
   1  12 -10   -0.10    1.20
   1  12 -10    1.50    1.30
  -1  12  10    1.50    1.00
   0 -12  10   33.20    3.50
   0  12 -10   23.70    3.00
   0  12  10   28.50    2.50
   0  12 -10   27.90    3.10
   1 -12  10  116.99    5.90
  -1  12 -10  108.09    5.80
  -1  12 -10  122.29    6.40
   1  12  10  128.29    5.50
   2 -12  10  216.98    8.50
  -2  12 -10  220.78    9.00
   2  12  10  206.58    8.20
  -2  12 -10  216.38    9.40
   3  12  10   13.80    2.20
  -3  12 -10   19.80    2.90
  -3  12 -10   13.30    2.50
  -4 -12 -10   18.10    2.30
   4  12  10   16.90    2.50
  -4  12 -10   20.00    2.90
  -5 -12 -10   52.39    3.70
   5  12  10   60.99    4.20
  -5  12 -10   53.89    4.30
  -6 -12 -10    6.60    1.80
  -6  12 -10    8.70    2.30
   6  12  10   13.70    2.50
  -7 -12 -10    8.20    2.20
  -7  12 -10    8.90    2.30
   7  12  10    7.30    2.00
  -7 -13  10    3.90    2.10
  -6 -13  10   -0.90    1.50
  -5 -13  10   65.89    5.00
  -5  13  10   63.19    3.10
   5  13 -10   62.49    4.40
   5  13 -10   65.59    4.50
  -4 -13  10    3.80    1.80
   4  13 -10    4.40    1.60
  -4  13  10    3.20    1.00
   4  13 -10    1.20    1.40
  -3 -13  10   24.10    3.30
   3  13 -10   31.00    3.30
   3  13 -10   24.60    3.20
  -3  13  10   22.10    2.20
  -2 -13  10   51.89    4.20
  -2  13  10   56.79    3.30
   2  13 -10   56.99    4.20
   2  13 -10   50.69    3.80
  -1 -13  10  142.59    6.90
   1  13 -10  150.78    6.80
  -1  13  10  133.79    5.70
   1  13 -10  132.09    6.90
   0 -13  10    1.10    1.40
   0  13 -10    0.00    1.20
   0  13  10   -1.80    0.80
   0  13 -10    0.90    1.40
   1 -13  10   13.10    2.30
  -1  13 -10   16.30    2.60
   1  13  10   13.70    2.10
  -1  13 -10   15.00    2.70
   2  13  10   18.00    2.40
  -2  13 -10   13.30    2.50
  -2  13 -10   13.70    2.60
   3  13  10   36.80    3.10
  -3  13 -10   27.20    3.60
  -3  13 -10   34.10    3.70
   4  13  10    0.40    1.20
  -4  13 -10    2.20    1.50
  -4  13 -10    1.40    1.60
  -5 -13 -10    1.20    1.30
  -5  13 -10    4.80    1.80
   5  13  10    0.50    1.40
  -6 -13 -10    6.20    1.90
   6  13  10    4.50    1.80
  -6  13 -10    3.60    1.90
  -6 -14  10    9.10    2.60
  -5 -14  10    5.60    2.20
   5  14 -10    2.80    1.70
  -5  14  10    3.50    1.00
  -4 -14  10   10.60    2.50
  -4  14  10   13.10    1.70
   4  14 -10    8.40    2.00
   4  14 -10   11.50    2.40
  -3 -14  10   20.60    3.10
   3  14 -10   16.70    2.80
  -3  14  10   16.30    2.00
   3  14 -10   15.80    2.60
  -2 -14  10   72.49    4.90
  -2  14  10   66.89    3.70
   2  14 -10   69.99    4.60
   2  14 -10   75.59    5.10
  -1 -14  10   -0.60    1.30
   1  14 -10    2.40    1.40
  -1  14  10    0.90    1.10
   1  14 -10   -0.50    1.20
   0 -14  10    3.50    1.60
   0  14 -10    2.50    1.70
   0  14  10    4.00    1.30
   0  14 -10    0.20    1.30
   1 -14  10   16.60    2.50
  -1  14 -10   10.70    2.20
  -1  14 -10   12.30    2.40
   1  14  10    9.10    2.00
  -2  14 -10   59.39    4.40
  -2  14 -10   65.89    4.80
   2  14  10   64.99    4.10
  -3  14 -10    0.20    1.30
  -3  14 -10    1.10    1.40
   3  14  10    1.30    1.30
   4  14  10   20.30    2.70
  -4  14 -10   18.70    3.00
  -5  14 -10   24.80    3.40
   5  14  10   24.10    3.10
  -6  14 -10   15.40    2.90
   6  14  10   27.00    3.30
  -6 -15  10   -0.10    1.60
  -5 -15  10    1.90    1.70
  -5  15  10    3.50    1.10
  -4 -15  10   -1.50    1.40
  -4  15  10    0.10    0.80
   4  15 -10   -0.30    1.20
   4  15 -10    0.80    1.40
  -3 -15  10    7.90    2.20
  -3  15  10    7.20    1.50
   3  15 -10    7.30    2.00
   3  15 -10    5.40    1.90
  -2 -15  10    1.60    1.60
  -2  15  10    0.20    1.00
   2  15 -10   -0.50    1.40
   2  15 -10    1.00    1.40
  -1 -15  10   39.50    3.90
   1  15 -10   35.00    3.70
   1  15 -10   31.20    3.90
  -1  15  10   35.90    2.90
   0 -15  10    3.40    1.70
   0  15  10    1.50    1.10
   0  15 -10   -1.00    1.40
   0  15 -10    0.50    1.30
  -1  15 -10   15.30    2.90
   1  15  10   12.30    2.10
  -1  15 -10   16.20    2.70
   2  15  10   -0.80    1.10
  -2  15 -10    4.50    1.80
  -2  15 -10    1.40    1.60
  -3  15 -10  102.99    5.90
   3  15  10  100.79    5.50
  -4  15 -10    7.70    2.10
   4  15  10    8.60    2.10
   5  15  10    2.00    1.60
  -5  15 -10    0.80    1.50
  -5 -16  10    4.90    2.30
  -5  16  10    4.70    1.20
  -4 -16  10   18.80    3.20
   4  16 -10   19.60    2.90
  -4  16  10   20.40    2.20
  -3 -16  10   11.60    2.60
  -3  16  10   10.20    1.70
   3  16 -10   11.40    2.40
  -2 -16  10   -0.90    1.30
   2  16 -10    0.50    1.40
  -2  16  10   -0.10    1.00
  -1 -16  10    7.30    2.10
  -1  16  10    5.40    1.50
   1  16 -10    6.10    2.00
   0  16  10   46.40    3.40
   0  16 -10   43.40    4.40
   1  16  10    0.00    1.10
  -1  16 -10    0.30    1.40
  -2  16 -10    2.00    1.50
   2  16  10    1.70    1.40
  -3  16 -10   14.20    2.70
   3  16  10   10.50    2.20
   4  16  10   33.10    3.50
  -4  16 -10   37.20    4.30
   5  16  10    2.30    1.70
  -5  16 -10    5.20    2.10
  -4 -17  10   54.29    4.60
   4  17 -10   52.39    4.40
  -4  17  10   51.29    3.30
  -3 -17  10   11.60    2.60
   3  17 -10   18.50    3.00
  -3  17  10   17.90    2.20
  -2 -17  10   22.80    3.20
   2  17 -10   19.30    3.00
  -2  17  10   22.60    2.60
   1  17 -10   23.90    3.20
  -1  17  10   22.20    2.60
   0  17 -10   -1.50    1.20
   0  17  10    0.60    1.10
  -1  17 -10   10.70    2.50
   1  17  10   10.30    2.10
   2  17  10   -1.20    1.10
  -2  17 -10   -1.80    1.20
  -3  17 -10   11.10    2.50
   3  17  10    9.50    2.20
  -4  17 -10   -0.50    1.40
   4  17  10   -0.20    1.30
  -3 -18  10    2.10    1.80
   3  18 -10    3.80    2.00
  -3  18  10    3.60    1.40
  -2  18  10   14.90    2.10
   2  18 -10   11.60    2.60
  -1  18  10   13.00    2.20
   1  18 -10   17.20    3.00
   0  18 -10    1.60    1.70
   0  18  10    2.70    1.40
   1  18  10    4.70    1.70
  -1  18 -10    3.10    1.80
   2  18  10    4.80    1.80
  -2  18 -10    5.40    2.20
  -3  18 -10    4.10    2.00
   3  18  10    6.10    1.90
   1  19 -10   25.70    3.60
  -1  19  10   28.30    3.20
   0  19 -10    2.20    1.80
   0  19  10   -0.70    1.10
  -9   0  11   11.40    2.30
  -8   0  11    1.50    1.30
  -7   0  11   14.60    2.40
  -6   0  11   -0.40    1.00
  -5   0  11  454.95   14.90
  -4   0  11   -0.80    0.90
   4   0 -11   -0.20    0.60
  -3   0  11  119.69    5.50
   2   0 -11    1.60    0.80
  -2   0  11   -0.50    0.90
  -1   0  11    8.40    1.70
   1   0 -11    8.80    1.40
   0   0 -11    0.60    0.90
   0   0  11   -0.10    0.90
   1   0  11  482.65   15.90
  -1   0 -11  520.25   15.80
  -2   0 -11   -1.20    0.80
   2   0  11   -1.20    0.80
   3   0  11    5.80    1.60
  -3   0 -11    8.90    1.70
  -4   0 -11    0.60    1.20
   4   0  11    0.70    1.20
   5   0  11    4.90    1.60
  -5   0 -11    9.40    1.90
[truncated: 87,193 more chars]
