# Supplementary material for: Single Crystal Structure Analysis of Three Novel Iron(II) Coordination Polymers with Bridging 1,3,5-Tris(1H-1,2,4-triazol-1-yl)methyl)benzene
Source: Preprints.org preprint supplement (doi:10.20944/preprints202309.1826.v1), 2023-09-27
Supplement: Supplementary file 4 [file supplementary › Fe(1-tbbt)ClO4 H2O.cif]

data_fe(1-tbbt)clo4h2o
_publcif_datablock.id '{beabe5d7-1389-4f2c-8d45-dd68da88113f}'
loop_
_publcif_info_datablock.id
_publcif_info_datablock.publ_exptl
_publcif_info_datablock.publ_geom
_publcif_info_datablock.structure
'{beabe5d7-1389-4f2c-8d45-dd68da88113f}' y y y

_audit_update_record
;
2023-05-29 # Formatted by publCIF

;

# publcif _publ_body_element loop start
loop_
_publ_body_element
_publ_body_title
_publ_body_contents

 section 
;
Introduction
; 
;

;
 section 
;
Experimental
; 
;

;
 subsection 
;
Synthesis and crystallization
; 
;

;
 subsection 
;
Refinement
;
;
Crystal data, data collection and structure refinement details are summarized
in Table 1.
;

 section 
;
Results and discussion
; 
;

;
# publcif _publ_body_element loop end
_audit_creation_date               2022-12-15
_audit_creation_method
;
Olex2 1.5
(compiled 2022.04.07 svn.rca3783a0 for OlexSys, GUI svn.r6498)
;
_shelx_SHELXL_version_number       '2017/1'
_audit_contact_author_address      ?
_audit_contact_author_email        ?
_audit_contact_author_name         ''
_audit_contact_author_phone        ?
_publ_contact_author_id_orcid      ?
_publ_section_references
;
Dolomanov, O. V., Bourhis, L. J., Gildea, R. J., Howard, J. A. K. & Puschmann,
H. (2009). <i>J. Appl. Cryst.</i> <b>42</b>, 339--341.

Sheldrick, G. M. (2008). <i>Acta Cryst.</i> A<b>64</b>, 112--122.
;
_chemical_name_common              ?
_chemical_name_systematic          ?
_chemical_formula_moiety           'C30 H34 Fe N18 O2, 2(Cl O4), 4(H2 O)'
_chemical_formula_sum              'C30 H42 Cl2 Fe N18 O14'
_chemical_formula_weight           1005.56
_chemical_melting_point            ?
_chemical_oxdiff_formula           FeC15H15ClO4N9
loop_
  _atom_type_symbol
  _atom_type_description
  _atom_type_scat_dispersion_real
  _atom_type_scat_dispersion_imag
  _atom_type_scat_source
 'C' 'C' 0.0181 0.0091 'International Tables Vol C Tables 4.2.6.8 and 6.1.1.4'
 'H' 'H' 0.0000 0.0000 'International Tables Vol C Tables 4.2.6.8 and 6.1.1.4'
 'Cl' 'Cl' 0.3639 0.7018 'International Tables Vol C Tables 4.2.6.8 and 6.1.1.4'
 'Fe' 'Fe' -1.1336 3.1974
 'International Tables Vol C Tables 4.2.6.8 and 6.1.1.4'
 'N' 'N' 0.0311 0.0180 'International Tables Vol C Tables 4.2.6.8 and 6.1.1.4'
 'O' 'O' 0.0492 0.0322 'International Tables Vol C Tables 4.2.6.8 and 6.1.1.4'

_shelx_space_group_comment
;
The symmetry employed for this shelxl refinement is uniquely defined
by the following loop, which should always be used as a source of
symmetry information in preference to the above space-group names.
They are only intended as comments.
;
_space_group_crystal_system        monoclinic
_space_group_IT_number             14
_space_group_name_H-M_alt          'P 1 21/n 1'
_space_group_name_Hall             '-P 2yn'
loop_
  _space_group_symop_operation_xyz
 'x, y, z'
 '-x+1/2, y+1/2, -z+1/2'
 '-x, -y, -z'
 'x-1/2, -y-1/2, z-1/2'

_cell_length_a                     8.99180(10)
_cell_length_b                     18.0165(2)
_cell_length_c                     13.4614(2)
_cell_angle_alpha                  90
_cell_angle_beta                   91.5650(10)
_cell_angle_gamma                  90
_cell_volume                       2179.94(5)
_cell_formula_units_Z              2
_cell_measurement_reflns_used      10035
_cell_measurement_temperature      293.5(4)
_cell_measurement_theta_max        77.6610
_cell_measurement_theta_min        4.1030
_shelx_estimated_absorpt_T_max     0.708
_shelx_estimated_absorpt_T_min     0.279
_exptl_absorpt_coefficient_mu      4.640
_exptl_absorpt_correction_T_max    0.64218
_exptl_absorpt_correction_T_min    0.61974
_exptl_absorpt_correction_type     sphere
_exptl_absorpt_process_details
;
CrysAlisPro 1.171.41.90a (Rigaku Oxford Diffraction, 2020)
Spherical absorption correction
using equivalent radius and absorption coefficient.
Empirical absorption correction using spherical harmonics,
implemented in SCALE3 ABSPACK scaling algorithm.
;
_exptl_absorpt_special_details     ?
_exptl_crystal_colour              'clear yellowish white'
_exptl_crystal_colour_lustre       clear
_exptl_crystal_colour_modifier     yellowish
_exptl_crystal_colour_primary      white
_exptl_crystal_density_diffrn      1.532
_exptl_crystal_density_meas        ?
_exptl_crystal_density_method      'not measured'
_exptl_crystal_description         sphere
_exptl_crystal_F_000               1040
loop_
  _exptl_crystal_face_index_h
  _exptl_crystal_face_index_k
  _exptl_crystal_face_index_l
  _exptl_crystal_face_perp_dist
 1 -12 0 0.0280
 4 0 7 0.1828
 -4 0 -7 0.1452
 4 -9 0 0.0409
 -3 1 8 0.2126
 2 1 -8 0.1014
 -4 9 0 0.1186
 6 0 0 0.0363
 0 10 -4 0.0896
 4 9 0 0.0190
 -1 12 0 0.0520
 -2 -6 7 0.1724
 -6 0 2 0.1470
 -5 5 -2 0.1257
 -3 -10 1 0.0975
 -1 -11 0 0.0510
 -5 0 -5 0.1374

_exptl_crystal_size_max            0.37
_exptl_crystal_size_mid            0.19
_exptl_crystal_size_min            0.08
_exptl_crystal_size_rad            0.091
loop_
  _exptl_oxdiff_crystal_face_indexfrac_h
  _exptl_oxdiff_crystal_face_indexfrac_k
  _exptl_oxdiff_crystal_face_indexfrac_l
  _exptl_oxdiff_crystal_face_x
  _exptl_oxdiff_crystal_face_y
  _exptl_oxdiff_crystal_face_z
 0.8433 -11.5716 -0.0266 -0.1406 -0.5757 0.8054
 3.5704 0.0110 6.7650 0.1715 0.7305 0.6610
 -3.5702 -0.0156 -6.7653 -0.1716 -0.7308 -0.6607
 3.9969 -8.5233 -0.1286 0.3895 -0.3024 0.8700
 -2.8567 0.7512 7.7131 -0.7882 0.6023 0.1268
 2.3107 0.6961 -8.0992 0.7619 -0.5814 -0.2853
 -4.0001 8.5175 0.1464 -0.3910 0.3035 -0.8689
 5.8294 0.0418 0.1965 0.8329 0.2460 0.4958
 -0.0041 10.0710 -4.4427 0.4551 0.1392 -0.8795
 3.9698 8.5325 0.4385 0.7455 0.6397 -0.1871
 -0.8461 11.5702 0.1131 0.1358 0.5831 -0.8010
 -2.1725 -6.0684 6.8121 -0.7989 0.1929 0.5697
 -5.7502 -0.0579 1.7311 -0.9200 -0.0753 -0.3847
 -4.9867 5.2808 -2.0473 -0.4956 -0.0961 -0.8632
 -3.0436 -9.8186 1.4490 -0.7372 -0.5061 0.4477
 -1.2502 -11.4075 0.4839 -0.4652 -0.6039 0.6472
 -4.8263 -0.0905 -4.7153 -0.4591 -0.6044 -0.6511

_exptl_transmission_factor_max     ?
_exptl_transmission_factor_min     ?
_diffrn_reflns_av_R_equivalents    0.0398
_diffrn_reflns_av_unetI/netI       0.0329
_diffrn_reflns_Laue_measured_fraction_full  0.999
_diffrn_reflns_Laue_measured_fraction_max  0.999
_diffrn_reflns_limit_h_max         10
_diffrn_reflns_limit_h_min         -10
_diffrn_reflns_limit_k_max         21
_diffrn_reflns_limit_k_min         -21
_diffrn_reflns_limit_l_max         16
_diffrn_reflns_limit_l_min         -16
_diffrn_reflns_number              16794
_diffrn_reflns_point_group_measured_fraction_full  0.999
_diffrn_reflns_point_group_measured_fraction_max  0.999
_diffrn_reflns_theta_full          67.079
_diffrn_reflns_theta_max           67.079
_diffrn_reflns_theta_min           4.101
_diffrn_ambient_environment        air
_diffrn_ambient_temperature        293.5(4)
_diffrn_detector                   'Hybrid Pixel Array Detector'
_diffrn_detector_area_resol_mean   10.0000
_diffrn_detector_type              HyPix
_diffrn_measured_fraction_theta_full  0.999
_diffrn_measured_fraction_theta_max  0.999
_diffrn_measurement_details
;
List of Runs (angles in degrees, time in seconds):

  # Type    Start    End  Width  t~exp~   \w     \q     \k     \f   Frames
--------------------------------------------------------------------------
  1  \w     43.00 100.00   0.50    0.37    --  109.38 -77.00  30.00  114
  2  \w     37.00  88.00   0.50    0.37    --  109.38 -77.00-120.00  102
  3  \w    -21.00   4.00   0.50    0.09    --   49.31 -19.00 -90.00   50
  4  \w    -20.00  28.00   0.50    0.09    --   49.31 -56.00  -5.00   96
  5  \w    -12.00  20.00   0.50    0.09    --   49.31 -19.00 120.00   64
  6  \w     54.00  79.00   0.50    0.09    --   49.31  56.00 136.00   50
  7  \w     98.00 172.00   0.50    0.37    --  109.38  56.00 136.00  148
  8  \w    145.00 170.00   0.50    0.37    --  109.38  38.00  60.00   50
  9  \w     99.00 131.00   0.50    0.37    --  109.38  38.00  60.00   64
 10  \w    102.00 177.00   0.50    0.37    --  109.38  38.00-150.00  150
 11  \w    -45.00 -20.00   0.50    0.37    --  -90.00  38.00 -90.00   50
 12  \w    -71.00 -46.00   0.50    0.37    --  -90.00  57.00-150.00   50
 13  \w    -48.00 -19.00   0.50    0.37    --  -90.00  38.00 -30.00   58
 14  \w    -43.00 -18.00   0.50    0.37    --  -90.00  38.00-120.00   50
 15  \w    -50.00 -24.00   0.50    0.37    --  -90.00  57.00  90.00   52
 16  \w    -44.00 -18.00   0.50    0.37    --  -90.00  38.00 120.00   52
 17  \w    -57.00 -22.00   0.50    0.37    --  -90.00  56.00 136.00   70
 18  \w    -62.00  23.00   0.50    0.09    --  -49.31  56.00 136.00  170
 19  \w    -48.00 -18.00   0.50    0.37    --  -90.00  38.00  60.00   60
 20  \w    -47.00 -18.00   0.50    0.37    --  -90.00  38.00 -60.00   58
 21  \w    -48.00 -20.00   0.50    0.37    --  -90.00  38.00-150.00   56
 22  \w    -69.00 -43.00   0.50    0.37    --  -90.00 125.00-120.00   52
 23  \w   -140.00 -79.00   0.50    0.37    --  -90.00 -57.00-120.00  122
 24  \w   -101.00 -70.00   0.50    0.37    --  -90.00 -77.00 -30.00   62
 25  \w   -101.00 -76.00   0.50    0.37    --  -90.00 -56.00  -5.00   50
 26  \w   -161.00-125.00   0.50    0.37    --  -90.00 -77.00 -30.00   72
 27  \w   -158.00-133.00   0.50    0.37    --  -90.00 -56.00  -5.00   50
 28  \w   -120.00 -62.00   0.50    0.09    --  -49.31 -56.00  -5.00  116
 29  \w   -115.00 -79.00   0.50    0.09    --  -49.31-125.00 150.00   72
;
_diffrn_measurement_device         'four-circle diffractometer'
_diffrn_measurement_device_type    'XtaLAB Synergy, Dualflex, HyPix'
_diffrn_measurement_method         '\w scans'
_diffrn_orient_matrix_type        
 'CrysAlisPro convention (1999,Acta A55,543-557)'
_diffrn_orient_matrix_UB_11        0.1444297000
_diffrn_orient_matrix_UB_12        0.0227950000
_diffrn_orient_matrix_UB_13        -0.0509103000
_diffrn_orient_matrix_UB_21        0.0388783000
_diffrn_orient_matrix_UB_22        0.0523871000
_diffrn_orient_matrix_UB_23        0.0873812000
_diffrn_orient_matrix_UB_31        0.0836967000
_diffrn_orient_matrix_UB_32        -0.0636296000
_diffrn_orient_matrix_UB_33        0.0536389000
_diffrn_radiation_monochromator    mirror
_diffrn_radiation_probe            x-ray
_diffrn_radiation_type             'Cu K\a'
_diffrn_radiation_wavelength       1.54184
_diffrn_source                     'micro-focus sealed X-ray tube'
_diffrn_source_type                'PhotonJet (Cu) X-ray Source'
_reflns_Friedel_coverage           0.000
_reflns_Friedel_fraction_full      .
_reflns_Friedel_fraction_max       .
_reflns_number_gt                  3565
_reflns_number_total               3890
_reflns_special_details
;
 Reflections were merged by SHELXL according to the crystal
 class for the calculation of statistics and refinement.
 
 _reflns_Friedel_fraction is defined as the number of unique
 Friedel pairs measured divided by the number that would be
 possible theoretically, ignoring centric projections and
 systematic absences.
;
_reflns_threshold_expression       'I > 2\s(I)'
_computing_cell_refinement         'CrysAlisPro 1.171.41.90a (Rigaku OD, 2020)'
_computing_data_collection         'CrysAlisPro 1.171.41.90a (Rigaku OD, 2020)'
_computing_data_reduction          'CrysAlisPro 1.171.41.90a (Rigaku OD, 2020)'
_computing_molecular_graphics      'Olex2 1.5 (Dolomanov et al., 2009)'
_computing_publication_material    'Olex2 1.5 (Dolomanov et al., 2009)'
_computing_structure_refinement    'XL  (Sheldrick, 2008)'
_computing_structure_solution      'SHELXT 2014/5 (Sheldrick, 2014)'
_refine_diff_density_max           0.506
_refine_diff_density_min           -0.483
_refine_diff_density_rms           0.066
_refine_ls_extinction_coef         .
_refine_ls_extinction_method       none
_refine_ls_goodness_of_fit_ref     1.061
_refine_ls_hydrogen_treatment      mixed
_refine_ls_matrix_type             full
_refine_ls_number_parameters       327
_refine_ls_number_reflns           3890
_refine_ls_number_restraints       3
_refine_ls_R_factor_all            0.0491
_refine_ls_R_factor_gt             0.0454
_refine_ls_restrained_S_all        1.061
_refine_ls_shift/su_max            0.000
_refine_ls_shift/su_mean           0.000
_refine_ls_structure_factor_coef   Fsqd
_refine_ls_weighting_details      
 'w=1/[\s^2^(Fo^2^)+(0.0733P)^2^+1.3604P] where P=(Fo^2^+2Fc^2^)/3'
_refine_ls_weighting_scheme        calc
_refine_ls_wR_factor_gt            0.1243
_refine_ls_wR_factor_ref           0.1271
_refine_special_details
;
Refinement of F^2^ against ALL reflections. The weighted R-factor wR and
 goodness of fit S are based on F^2^, conventional R-factors R are based
 on F, with F set to zero for negative F^2^. The threshold expression of
 F^2^ > 2sigma(F^2^) is used only for calculating R-factors(gt) etc. and is
 not relevant to the choice of reflections for refinement.  R-factors based
 on F^2^ are statistically about twice as large as those based on F, and R-
 factors based on ALL data will be even larger.
;
_olex2_refinement_description
;
1. Fixed Uiso
 At 1.2 times of:
  All C(H) groups, All C(H,H) groups
2. Restrained distances
 O3-H3C
 0.95 with sigma of 0.02
 H2B-O3
 1.89 with sigma of 0.02
 H2B-H3D
 2.1 with sigma of 0.02
3.a Secondary CH2 refined with riding coordinates:
 C3(H3A,H3B), C10(H10A,H10B), C13(H13A,H13B)
3.b Aromatic/amide H refined with riding coordinates:
 C1(H1), C2(H2), C5(H5), C7(H7), C9(H9), C14(H14), C15(H15)
;
_atom_sites_solution_hydrogens     mixed
_atom_sites_solution_primary       ?
_atom_sites_solution_secondary     ?
loop_
  _atom_site_label
  _atom_site_type_symbol
  _atom_site_fract_x
  _atom_site_fract_y
  _atom_site_fract_z
  _atom_site_U_iso_or_equiv
  _atom_site_adp_type
  _atom_site_occupancy
  _atom_site_site_symmetry_order
  _atom_site_calc_flag
  _atom_site_refinement_flags_posn
  _atom_site_refinement_flags_adp
  _atom_site_refinement_flags_occupancy
  _atom_site_disorder_assembly
  _atom_site_disorder_group
 Fe1 Fe 0.500000 0.500000 0.000000 0.02459(16) Uani 1 2 d S . P . .
 O1 O 0.4260(2) 0.60500(11) -0.04084(15) 0.0392(4) Uani 1 1 d . . . . .
 N1 N 0.5906(2) 0.55245(11) 0.13638(14) 0.0303(4) Uani 1 1 d . . . . .
 N2 N 0.5877(2) 0.62142(12) 0.27472(15) 0.0356(5) Uani 1 1 d . . . . .
 N3 N 0.7261(2) 0.59369(11) 0.26008(14) 0.0303(4) Uani 1 1 d . . . . .
 N4 N 0.8985(3) 0.22775(13) 0.4922(2) 0.0537(7) Uani 1 1 d . . . . .
 N5 N 0.7963(3) 0.31544(13) 0.39429(16) 0.0441(6) Uani 1 1 d . . . . .
 N6 N 0.7455(3) 0.32147(11) 0.48810(16) 0.0381(5) Uani 1 1 d . . . . .
 N7 N 0.7055(2) 0.52109(12) 0.91572(15) 0.0321(4) Uani 1 1 d . . . . .
 N8 N 0.9200(3) 0.50114(14) 0.8390(2) 0.0489(6) Uani 1 1 d . . . . .
 N9 N 0.8412(2) 0.55651(12) 0.79393(14) 0.0335(5) Uani 1 1 d . . . . .
 C1 C 0.7258(3) 0.55303(14) 0.17816(17) 0.0313(5) Uani 1 1 d . . . . .
 H1 H 0.808053 0.528529 0.153605 0.038 Uiso 1 1 calc R U . . .
 C2 C 0.5108(3) 0.59560(14) 0.19811(17) 0.0325(5) Uani 1 1 d . . . . .
 H2 H 0.410409 0.605931 0.187031 0.039 Uiso 1 1 calc R U . . .
 C3 C 0.8453(3) 0.60393(15) 0.33474(18) 0.0367(6) Uani 1 1 d . . . . .
 H3A H 0.856000 0.656409 0.349334 0.044 Uiso 1 1 calc R U . . .
 H3B H 0.938267 0.586543 0.308202 0.044 Uiso 1 1 calc R U . . .
 C4 C 0.8149(3) 0.56240(13) 0.42993(17) 0.0300(5) Uani 1 1 d . . . . .
 C5 C 0.7427(3) 0.49416(13) 0.4285(2) 0.0349(6) Uani 1 1 d . . . . .
 H5 H 0.709507 0.474086 0.368190 0.042 Uiso 1 1 calc R U . . .
 C6 C 0.7198(3) 0.45571(13) 0.51600(19) 0.0335(5) Uani 1 1 d . . . . .
 C7 C 0.7693(3) 0.48638(14) 0.60586(19) 0.0338(5) Uani 1 1 d . . . . .
 H7 H 0.755137 0.460577 0.664687 0.041 Uiso 1 1 calc R U . . .
 C8 C 0.8392(3) 0.55467(14) 0.60880(17) 0.0309(5) Uani 1 1 d . . . . .
 C9 C 0.8609(3) 0.59246(13) 0.51978(17) 0.0307(5) Uani 1 1 d . . . . .
 H9 H 0.907177 0.638628 0.521134 0.037 Uiso 1 1 calc R U . . .
 C10 C 0.6432(3) 0.38112(15) 0.5136(2) 0.0434(6) Uani 1 1 d . . . . .
 H10A H 0.602209 0.371105 0.578109 0.052 Uiso 1 1 calc R U . . .
 H10B H 0.561434 0.382411 0.465053 0.052 Uiso 1 1 calc R U . . .
 C11 C 0.8868(4) 0.25863(16) 0.4013(2) 0.0483(7) Uani 1 1 d . . . . .
 H11 H 0.943(4) 0.241(2) 0.347(3) 0.060(10) Uiso 1 1 d . . . . .
 C12 C 0.8078(4) 0.26923(17) 0.5443(2) 0.0511(8) Uani 1 1 d . . . . .
 H12 H 0.785(5) 0.264(2) 0.606(3) 0.078(13) Uiso 1 1 d . . . . .
 C13 C 0.8940(3) 0.59185(16) 0.70372(17) 0.0397(6) Uani 1 1 d . . . . .
 H13A H 1.001951 0.591499 0.705653 0.048 Uiso 1 1 calc R U . . .
 H13B H 0.861929 0.643247 0.702865 0.048 Uiso 1 1 calc R U . . .
 C14 C 0.8336(3) 0.48179(17) 0.9115(2) 0.0424(6) Uani 1 1 d . . . . .
 H14 H 0.858220 0.444190 0.956363 0.051 Uiso 1 1 calc R U . . .
 C15 C 0.7151(3) 0.56726(14) 0.83958(18) 0.0345(5) Uani 1 1 d . . . . .
 H15 H 0.643318 0.602146 0.821021 0.041 Uiso 1 1 calc R U . . .
 Cl1 Cl 0.60558(10) 0.76883(5) 0.66260(6) 0.0607(2) Uani 1 1 d . . . . .
 O4 O 0.6764(10) 0.7423(4) 0.5845(4) 0.240(4) Uani 1 1 d . . . . .
 O5 O 0.4899(5) 0.8119(2) 0.6212(4) 0.1377(17) Uani 1 1 d . . . . .
 O6 O 0.7001(6) 0.8129(3) 0.7194(3) 0.167(3) Uani 1 1 d . . . . .
 O7 O 0.5528(6) 0.7123(3) 0.7189(4) 0.177(3) Uani 1 1 d . . . . .
 O2 O 0.2395(3) 0.62889(14) -0.19263(18) 0.0625(6) Uani 1 1 d . . . . .
 O3 O 0.0421(4) 0.73145(19) -0.1230(2) 0.0910(10) Uani 1 1 d D . . . .
 H1A H 0.374(5) 0.614(2) -0.083(3) 0.078(14) Uiso 1 1 d . . . . .
 H1B H 0.470(5) 0.647(2) -0.033(3) 0.068(12) Uiso 1 1 d . . . . .
 H2A H 0.309(7) 0.655(3) -0.241(5) 0.14(2) Uiso 1 1 d . . . . .
 H2B H 0.187(5) 0.662(2) -0.156(4) 0.110(18) Uiso 1 1 d D . . . .
 H3C H 0.088(10) 0.778(3) -0.137(7) 0.23(5) Uiso 1 1 d D . . . .
 H3D H 0.024(9) 0.700(6) -0.060(6) 0.25(4) Uiso 1 1 d D . . . .

loop_
  _atom_site_aniso_label
  _atom_site_aniso_U_11
  _atom_site_aniso_U_22
  _atom_site_aniso_U_33
  _atom_site_aniso_U_23
  _atom_site_aniso_U_13
  _atom_site_aniso_U_12
 Fe1 0.0259(3) 0.0277(3) 0.0200(3) -0.00062(18) -0.00193(18) -0.00008(19)
 O1 0.0451(11) 0.0315(10) 0.0401(10) 0.0016(8) -0.0135(9) 0.0019(8)
 N1 0.0314(10) 0.0348(11) 0.0244(9) -0.0026(8) -0.0032(8) -0.0001(8)
 N2 0.0412(12) 0.0363(11) 0.0293(10) -0.0036(8) 0.0003(9) 0.0024(9)
 N3 0.0332(10) 0.0337(10) 0.0238(9) -0.0010(8) -0.0040(8) -0.0027(8)
 N4 0.0654(17) 0.0347(13) 0.0606(16) 0.0035(11) -0.0060(13) 0.0037(11)
 N5 0.0632(15) 0.0368(12) 0.0323(12) -0.0037(9) 0.0004(10) -0.0004(11)
 N6 0.0515(13) 0.0278(10) 0.0349(11) -0.0010(9) 0.0012(9) -0.0065(9)
 N7 0.0313(11) 0.0379(11) 0.0270(10) 0.0008(8) 0.0005(8) -0.0030(8)
 N8 0.0347(13) 0.0668(18) 0.0454(14) 0.0144(11) 0.0064(11) 0.0098(10)
 N9 0.0330(11) 0.0445(12) 0.0231(10) 0.0028(8) -0.0006(8) -0.0054(9)
 C1 0.0298(12) 0.0394(13) 0.0246(11) -0.0022(10) -0.0012(9) 0.0013(10)
 C2 0.0318(12) 0.0361(13) 0.0296(12) -0.0025(10) -0.0019(9) 0.0031(10)
 C3 0.0400(13) 0.0437(14) 0.0258(12) 0.0031(10) -0.0094(10) -0.0137(11)
 C4 0.0306(12) 0.0315(12) 0.0276(11) 0.0009(9) -0.0020(9) -0.0019(9)
 C5 0.0389(14) 0.0347(13) 0.0308(13) -0.0053(10) -0.0028(11) -0.0043(10)
 C6 0.0345(13) 0.0288(12) 0.0373(13) -0.0012(10) 0.0039(10) -0.0013(10)
 C7 0.0366(13) 0.0347(13) 0.0304(13) 0.0046(10) 0.0045(10) -0.0019(10)
 C8 0.0303(12) 0.0368(13) 0.0255(11) -0.0001(10) -0.0002(9) -0.0031(10)
 C9 0.0322(12) 0.0316(12) 0.0283(12) 0.0007(9) -0.0023(9) -0.0061(10)
 C10 0.0470(15) 0.0327(14) 0.0510(16) -0.0040(12) 0.0094(12) -0.0073(12)
 C11 0.0624(18) 0.0344(14) 0.0482(17) -0.0081(13) 0.0010(14) -0.0003(13)
 C12 0.074(2) 0.0394(15) 0.0401(16) 0.0074(13) -0.0025(15) -0.0027(14)
 C13 0.0447(15) 0.0508(16) 0.0236(12) 0.0002(11) 0.0021(10) -0.0156(12)
 C14 0.0354(14) 0.0535(16) 0.0383(15) 0.0146(12) 0.0009(11) 0.0039(12)
 C15 0.0339(13) 0.0395(14) 0.0300(12) 0.0003(10) 0.0009(10) 0.0002(10)
 Cl1 0.0673(5) 0.0613(5) 0.0531(5) -0.0036(4) -0.0079(4) -0.0006(4)
 O4 0.328(10) 0.267(8) 0.128(4) -0.035(5) 0.060(5) 0.166(8)
 O5 0.106(3) 0.102(3) 0.202(5) 0.037(3) -0.052(3) 0.004(2)
 O6 0.174(4) 0.222(5) 0.101(3) 0.046(3) -0.054(3) -0.137(4)
 O7 0.160(4) 0.158(4) 0.209(5) 0.119(4) -0.088(4) -0.089(3)
 O2 0.0736(16) 0.0613(15) 0.0515(14) 0.0065(11) -0.0191(12) 0.0111(12)
 O3 0.118(3) 0.079(2) 0.077(2) 0.0119(16) 0.0228(18) 0.0291(19)

_geom_special_details
;
 All esds (except the esd in the dihedral angle between two l.s. planes)
 are estimated using the full covariance matrix.  The cell esds are taken
 into account individually in the estimation of esds in distances, angles
 and torsion angles; correlations between esds in cell parameters are only
 used when they are defined by crystal symmetry.  An approximate (isotropic)
 treatment of cell esds is used for estimating esds involving l.s. planes.
;
loop_
  _geom_bond_atom_site_label_1
  _geom_bond_atom_site_label_2
  _geom_bond_distance
  _geom_bond_site_symmetry_2
  _geom_bond_publ_flag
 Fe1 O1 2.0745(19) . ?
 Fe1 O1 2.0746(19) 3_665 ?
 Fe1 N1 2.2014(19) . ?
 Fe1 N1 2.2014(19) 3_665 ?
 Fe1 N7 2.227(2) 3_666 ?
 Fe1 N7 2.227(2) 1_554 ?
 O1 H1A 0.75(5) . ?
 O1 H1B 0.86(5) . ?
 N1 C1 1.325(3) . ?
 N1 C2 1.357(3) . ?
 N2 N3 1.361(3) . ?
 N2 C2 1.311(3) . ?
 N3 C1 1.324(3) . ?
 N3 C3 1.461(3) . ?
 N4 C11 1.346(4) . ?
 N4 C12 1.321(5) . ?
 N5 N6 1.359(3) . ?
 N5 C11 1.309(4) . ?
 N6 C10 1.462(4) . ?
 N6 C12 1.322(4) . ?
 N7 C14 1.354(4) . ?
 N7 C15 1.325(3) . ?
 N8 N9 1.357(3) . ?
 N8 C14 1.311(4) . ?
 N9 C13 1.462(3) . ?
 N9 C15 1.319(3) . ?
 C1 H1 0.9300 . ?
 C2 H2 0.9300 . ?
 C3 H3A 0.9700 . ?
 C3 H3B 0.9700 . ?
 C3 C4 1.515(3) . ?
 C4 C5 1.390(3) . ?
 C4 C9 1.378(3) . ?
 C5 H5 0.9300 . ?
 C5 C6 1.387(4) . ?
 C6 C7 1.392(4) . ?
 C6 C10 1.510(3) . ?
 C7 H7 0.9300 . ?
 C7 C8 1.382(4) . ?
 C8 C9 1.397(3) . ?
 C8 C13 1.513(3) . ?
 C9 H9 0.9300 . ?
 C10 H10A 0.9700 . ?
 C10 H10B 0.9700 . ?
 C11 H11 0.96(4) . ?
 C12 H12 0.87(4) . ?
 C13 H13A 0.9700 . ?
 C13 H13B 0.9700 . ?
 C14 H14 0.9300 . ?
 C15 H15 0.9300 . ?
 Cl1 O4 1.332(5) . ?
 Cl1 O5 1.401(4) . ?
 Cl1 O6 1.379(4) . ?
 Cl1 O7 1.363(4) . ?
 O2 H2A 1.03(7) . ?
 O2 H2B 0.91(3) . ?
 O3 H3C 0.95(2) . ?
 O3 H3D 1.03(10) . ?

loop_
  _geom_angle_atom_site_label_1
  _geom_angle_atom_site_label_2
  _geom_angle_atom_site_label_3
  _geom_angle
  _geom_angle_site_symmetry_1
  _geom_angle_site_symmetry_3
  _geom_angle_publ_flag
 O1 Fe1 O1 180.00(4) . 3_665 ?
 O1 Fe1 N1 93.54(8) 3_665 . ?
 O1 Fe1 N1 86.46(8) 3_665 3_665 ?
 O1 Fe1 N1 86.46(8) . . ?
 O1 Fe1 N1 93.54(8) . 3_665 ?
 O1 Fe1 N7 88.52(8) 3_665 3_666 ?
 O1 Fe1 N7 91.48(8) 3_665 1_554 ?
 O1 Fe1 N7 88.52(8) . 1_554 ?
 O1 Fe1 N7 91.48(8) . 3_666 ?
 N1 Fe1 N1 180.0 . 3_665 ?
 N1 Fe1 N7 93.34(7) 3_665 3_666 ?
 N1 Fe1 N7 86.66(7) . 3_666 ?
 N1 Fe1 N7 86.66(7) 3_665 1_554 ?
 N1 Fe1 N7 93.34(7) . 1_554 ?
 N7 Fe1 N7 180.00(11) 3_666 1_554 ?
 Fe1 O1 H1A 126(3) . . ?
 Fe1 O1 H1B 129(3) . . ?
 H1A O1 H1B 100(4) . . ?
 C1 N1 Fe1 132.19(16) . . ?
 C1 N1 C2 103.28(19) . . ?
 C2 N1 Fe1 124.51(16) . . ?
 C2 N2 N3 102.73(19) . . ?
 N2 N3 C3 120.7(2) . . ?
 C1 N3 N2 110.02(19) . . ?
 C1 N3 C3 128.9(2) . . ?
 C12 N4 C11 102.4(3) . . ?
 C11 N5 N6 102.7(2) . . ?
 N5 N6 C10 120.4(2) . . ?
 C12 N6 N5 109.1(2) . . ?
 C12 N6 C10 130.4(3) . . ?
 C14 N7 Fe1 130.56(18) . 1_556 ?
 C15 N7 Fe1 124.99(17) . 1_556 ?
 C15 N7 C14 102.9(2) . . ?
 C14 N8 N9 102.5(2) . . ?
 N8 N9 C13 121.0(2) . . ?
 C15 N9 N8 110.1(2) . . ?
 C15 N9 C13 128.8(2) . . ?
 N1 C1 H1 125.1 . . ?
 N3 C1 N1 109.8(2) . . ?
 N3 C1 H1 125.1 . . ?
 N1 C2 H2 122.9 . . ?
 N2 C2 N1 114.1(2) . . ?
 N2 C2 H2 122.9 . . ?
 N3 C3 H3A 109.2 . . ?
 N3 C3 H3B 109.2 . . ?
 N3 C3 C4 111.9(2) . . ?
 H3A C3 H3B 107.9 . . ?
 C4 C3 H3A 109.2 . . ?
 C4 C3 H3B 109.2 . . ?
 C5 C4 C3 121.3(2) . . ?
 C9 C4 C3 119.4(2) . . ?
 C9 C4 C5 119.3(2) . . ?
 C4 C5 H5 119.7 . . ?
 C6 C5 C4 120.6(2) . . ?
 C6 C5 H5 119.7 . . ?
 C5 C6 C7 119.2(2) . . ?
 C5 C6 C10 120.3(2) . . ?
 C7 C6 C10 120.5(2) . . ?
 C6 C7 H7 119.6 . . ?
 C8 C7 C6 120.9(2) . . ?
 C8 C7 H7 119.6 . . ?
 C7 C8 C9 118.9(2) . . ?
 C7 C8 C13 123.8(2) . . ?
 C9 C8 C13 117.3(2) . . ?
 C4 C9 C8 121.0(2) . . ?
 C4 C9 H9 119.5 . . ?
 C8 C9 H9 119.5 . . ?
 N6 C10 C6 111.7(2) . . ?
 N6 C10 H10A 109.3 . . ?
 N6 C10 H10B 109.3 . . ?
 C6 C10 H10A 109.3 . . ?
 C6 C10 H10B 109.3 . . ?
 H10A C10 H10B 107.9 . . ?
 N4 C11 H11 122(2) . . ?
 N5 C11 N4 114.9(3) . . ?
 N5 C11 H11 123(2) . . ?
 N4 C12 N6 110.9(3) . . ?
 N4 C12 H12 128(3) . . ?
 N6 C12 H12 122(3) . . ?
 N9 C13 C8 113.8(2) . . ?
 N9 C13 H13A 108.8 . . ?
 N9 C13 H13B 108.8 . . ?
 C8 C13 H13A 108.8 . . ?
 C8 C13 H13B 108.8 . . ?
 H13A C13 H13B 107.7 . . ?
 N7 C14 H14 122.8 . . ?
 N8 C14 N7 114.4(2) . . ?
 N8 C14 H14 122.8 . . ?
 N7 C15 H15 125.0 . . ?
 N9 C15 N7 110.1(2) . . ?
 N9 C15 H15 125.0 . . ?
 O4 Cl1 O5 104.5(4) . . ?
 O4 Cl1 O6 110.1(5) . . ?
 O4 Cl1 O7 110.6(5) . . ?
 O6 Cl1 O5 110.0(3) . . ?
 O7 Cl1 O5 111.7(3) . . ?
 O7 Cl1 O6 109.9(3) . . ?
 H2A O2 H2B 112(5) . . ?
 H3C O3 H3D 136(8) . . ?

loop_
  _geom_hbond_atom_site_label_D
  _geom_hbond_atom_site_label_H
  _geom_hbond_atom_site_label_A
  _geom_hbond_distance_DH
  _geom_hbond_distance_HA
  _geom_hbond_distance_DA
  _geom_hbond_angle_DHA
  _geom_hbond_site_symmetry_A
  _geom_hbond_publ_flag
 C1 H1 N8 0.93 2.50 3.346(3) 150.9 3_766 yes
 C2 H2 O6 0.93 2.44 3.264(4) 147.7 4_575 yes
 C10 H10A N2 0.97 2.65 3.572(4) 158.0 3_666 yes
 C12 H12 O6 0.87(4) 2.51(4) 3.279(5) 148(4) 2_646 yes
 C13 H13A O2 0.97 2.59 3.436(4) 145.2 1_656 yes
 C15 H15 O7 0.93 2.54 3.386(5) 152.2 . yes

loop_
  _geom_torsion_atom_site_label_1
  _geom_torsion_atom_site_label_2
  _geom_torsion_atom_site_label_3
  _geom_torsion_atom_site_label_4
  _geom_torsion
  _geom_torsion_site_symmetry_1
  _geom_torsion_site_symmetry_2
  _geom_torsion_site_symmetry_3
  _geom_torsion_site_symmetry_4
  _geom_torsion_publ_flag
 Fe1 N1 C1 N3 179.08(16) . . . . ?
 Fe1 N1 C2 N2 -179.63(16) . . . . ?
 Fe1 N7 C14 N8 166.4(2) 1_556 . . . ?
 Fe1 N7 C15 N9 -167.59(16) 1_556 . . . ?
 N2 N3 C1 N1 0.2(3) . . . . ?
 N2 N3 C3 C4 66.4(3) . . . . ?
 N3 N2 C2 N1 0.8(3) . . . . ?
 N3 C3 C4 C5 35.0(3) . . . . ?
 N3 C3 C4 C9 -145.6(2) . . . . ?
 N5 N6 C10 C6 -71.0(3) . . . . ?
 N5 N6 C12 N4 -0.3(4) . . . . ?
 N6 N5 C11 N4 -0.1(3) . . . . ?
 N8 N9 C13 C8 89.9(3) . . . . ?
 N8 N9 C15 N7 0.6(3) . . . . ?
 N9 N8 C14 N7 -0.1(3) . . . . ?
 C1 N1 C2 N2 -0.8(3) . . . . ?
 C1 N3 C3 C4 -106.1(3) . . . . ?
 C2 N1 C1 N3 0.3(3) . . . . ?
 C2 N2 N3 C1 -0.6(3) . . . . ?
 C2 N2 N3 C3 -174.4(2) . . . . ?
 C3 N3 C1 N1 173.3(2) . . . . ?
 C3 C4 C5 C6 178.0(2) . . . . ?
 C3 C4 C9 C8 -177.9(2) . . . . ?
 C4 C5 C6 C7 0.3(4) . . . . ?
 C4 C5 C6 C10 -179.1(2) . . . . ?
 C5 C4 C9 C8 1.5(4) . . . . ?
 C5 C6 C7 C8 0.7(4) . . . . ?
 C5 C6 C10 N6 80.8(3) . . . . ?
 C6 C7 C8 C9 -0.6(4) . . . . ?
 C6 C7 C8 C13 179.2(2) . . . . ?
 C7 C6 C10 N6 -98.6(3) . . . . ?
 C7 C8 C9 C4 -0.5(4) . . . . ?
 C7 C8 C13 N9 -11.4(4) . . . . ?
 C9 C4 C5 C6 -1.4(4) . . . . ?
 C9 C8 C13 N9 168.3(2) . . . . ?
 C10 N6 C12 N4 -177.6(3) . . . . ?
 C10 C6 C7 C8 -179.9(2) . . . . ?
 C11 N4 C12 N6 0.2(4) . . . . ?
 C11 N5 N6 C10 177.9(2) . . . . ?
 C11 N5 N6 C12 0.2(3) . . . . ?
 C12 N4 C11 N5 0.0(4) . . . . ?
 C12 N6 C10 C6 106.0(3) . . . . ?
 C13 N9 C15 N7 176.3(2) . . . . ?
 C13 C8 C9 C4 179.7(2) . . . . ?
 C14 N7 C15 N9 -0.6(3) . . . . ?
 C14 N8 N9 C13 -176.4(2) . . . . ?
 C14 N8 N9 C15 -0.3(3) . . . . ?
 C15 N7 C14 N8 0.4(3) . . . . ?
 C15 N9 C13 C8 -85.3(3) . . . . ?

_shelx_res_file
;
TITL fe(1-tbbt)clo4dmf_a.res in P2(1)/n
    fe(1-tbbt)clo4h2o.res
    created by SHELXL-2017/1 at 11:33:39 on 15-Dec-2022
REM Old TITL Fe(1-tbbt)ClO4 DMF in P2(1)/n
REM SHELXT solution in P2(1)/n
REM R1 0.180, Rweak 0.067, Alpha 0.036, Orientation as input
REM Formula found by SHELXT: C40 N14 O4 Cl2 Fe1
CELL 1.54184 8.9918 18.0165 13.4614 90 91.565 90
ZERR 2 0.0001 0.0002 0.0002 0 0.001 0
LATT 1
SYMM 0.5-X,0.5+Y,0.5-Z
SFAC C H Cl Fe N O
UNIT 60 84 4 2 36 28
EQIV $1 1-X,1-Y,1-Z
EQIV $2 2-X,1-Y,1-Z
EQIV $3 -0.5+X,1.5-Y,-0.5+Z
EQIV $4 1.5-X,-0.5+Y,1.5-Z
EQIV $5 1+X,+Y,1+Z
DFIX 0.95 O3 H3c
DFIX 1.89 H2b O3
DFIX 2.1 H2b H3d

L.S. 50
PLAN  10
SIZE 0.08 0.19 0.37
TEMP 20.4(4)
CONF
HTAB C1 N8_$2
HTAB C2 O6_$3
HTAB C10 N2_$1
HTAB C12 O6_$4
HTAB C13 O2_$5
HTAB C15 O7
BOND $H
LIST 6
MORE -1
fmap 2 53
acta
REM <olex2.extras>
REM <HklSrc "%.\\Fe(1-tbbt)ClO4%20H2O.hkl">
REM </olex2.extras>

WGHT    0.073300    1.360400
FVAR       0.51789
FE1   4    0.500000    0.500000    0.000000    10.50000    0.02591    0.02770 =
         0.02001   -0.00062   -0.00193   -0.00008
O1    6    0.425994    0.604998   -0.040835    11.00000    0.04506    0.03146 =
         0.04014    0.00162   -0.01349    0.00187
N1    5    0.590630    0.552452    0.136383    11.00000    0.03136    0.03476 =
         0.02443   -0.00256   -0.00322   -0.00010
N2    5    0.587662    0.621422    0.274719    11.00000    0.04117    0.03628 =
         0.02930   -0.00364    0.00026    0.00242
N3    5    0.726128    0.593695    0.260076    11.00000    0.03323    0.03374 =
         0.02382   -0.00104   -0.00397   -0.00275
N4    5    0.898463    0.227750    0.492171    11.00000    0.06539    0.03466 =
         0.06060    0.00355   -0.00596    0.00372
N5    5    0.796297    0.315438    0.394295    11.00000    0.06321    0.03680 =
         0.03225   -0.00369    0.00038   -0.00045
N6    5    0.745546    0.321467    0.488097    11.00000    0.05151    0.02779 =
         0.03490   -0.00103    0.00123   -0.00650
N7    5    0.705529    0.521086    0.915716    11.00000    0.03131    0.03792 =
         0.02700    0.00085    0.00051   -0.00296
N8    5    0.919970    0.501137    0.839025    11.00000    0.03467    0.06684 =
         0.04538    0.01439    0.00643    0.00984
N9    5    0.841222    0.556506    0.793932    11.00000    0.03300    0.04446 =
         0.02308    0.00285   -0.00064   -0.00541
C1    1    0.725765    0.553028    0.178157    11.00000    0.02978    0.03939 =
         0.02456   -0.00215   -0.00118    0.00127
AFIX  43
H1    2    0.808053    0.528529    0.153605    11.00000   -1.20000
AFIX   0
C2    1    0.510828    0.595595    0.198114    11.00000    0.03183    0.03607 =
         0.02956   -0.00247   -0.00187    0.00305
AFIX  43
H2    2    0.410409    0.605931    0.187031    11.00000   -1.20000
AFIX   0
C3    1    0.845295    0.603926    0.334741    11.00000    0.04001    0.04371 =
         0.02576    0.00306   -0.00944   -0.01372
AFIX  23
H3A   2    0.856000    0.656409    0.349334    11.00000   -1.20000
H3B   2    0.938267    0.586543    0.308202    11.00000   -1.20000
AFIX   0
C4    1    0.814901    0.562400    0.429935    11.00000    0.03060    0.03153 =
         0.02759    0.00089   -0.00196   -0.00194
C5    1    0.742728    0.494159    0.428455    11.00000    0.03891    0.03466 =
         0.03082   -0.00528   -0.00280   -0.00426
AFIX  43
H5    2    0.709507    0.474086    0.368190    11.00000   -1.20000
AFIX   0
C6    1    0.719774    0.455705    0.516003    11.00000    0.03453    0.02876 =
         0.03733   -0.00123    0.00389   -0.00130
C7    1    0.769289    0.486381    0.605861    11.00000    0.03662    0.03466 =
         0.03043    0.00457    0.00454   -0.00186
AFIX  43
H7    2    0.755137    0.460577    0.664687    11.00000   -1.20000
AFIX   0
C8    1    0.839195    0.554675    0.608795    11.00000    0.03033    0.03676 =
         0.02546   -0.00007   -0.00020   -0.00305
C9    1    0.860922    0.592456    0.519775    11.00000    0.03215    0.03163 =
         0.02829    0.00072   -0.00226   -0.00614
AFIX  43
H9    2    0.907177    0.638628    0.521134    11.00000   -1.20000
AFIX   0
C10   1    0.643179    0.381122    0.513556    11.00000    0.04703    0.03272 =
         0.05100   -0.00402    0.00939   -0.00734
AFIX  23
H10A  2    0.602209    0.371105    0.578109    11.00000   -1.20000
H10B  2    0.561434    0.382411    0.465053    11.00000   -1.20000
AFIX   0
C11   1    0.886767    0.258627    0.401261    11.00000    0.06236    0.03438 =
         0.04819   -0.00814    0.00100   -0.00031
H11   2    0.943465    0.240972    0.347141    11.00000    0.06006
C12   1    0.807818    0.269229    0.544291    11.00000    0.07356    0.03939 =
         0.04012    0.00739   -0.00247   -0.00266
H12   2    0.785185    0.263764    0.606216    11.00000    0.07761
C13   1    0.894037    0.591847    0.703725    11.00000    0.04470    0.05084 =
         0.02356    0.00022    0.00210   -0.01556
AFIX  23
H13A  2    1.001951    0.591499    0.705653    11.00000   -1.20000
H13B  2    0.861929    0.643247    0.702865    11.00000   -1.20000
AFIX   0
C14   1    0.833593    0.481788    0.911525    11.00000    0.03544    0.05352 =
         0.03828    0.01459    0.00085    0.00393
AFIX  43
H14   2    0.858220    0.444190    0.956363    11.00000   -1.20000
AFIX   0
C15   1    0.715065    0.567257    0.839578    11.00000    0.03388    0.03952 =
         0.03001    0.00032    0.00091    0.00025
AFIX  43
H15   2    0.643318    0.602146    0.821021    11.00000   -1.20000
AFIX   0

CL1   3    0.605582    0.768828    0.662596    11.00000    0.06728    0.06128 =
         0.05305   -0.00361   -0.00785   -0.00063
O4    6    0.676363    0.742308    0.584491    11.00000    0.32752    0.26745 =
         0.12751   -0.03516    0.06039    0.16558
O5    6    0.489869    0.811877    0.621169    11.00000    0.10608    0.10165 =
         0.20229    0.03714   -0.05211    0.00448
O6    6    0.700080    0.812867    0.719428    11.00000    0.17441    0.22249 =
         0.10056    0.04555   -0.05431   -0.13738
O7    6    0.552821    0.712255    0.718890    11.00000    0.15952    0.15774 =
         0.20864    0.11890   -0.08781   -0.08895
O2    6    0.239464    0.628894   -0.192633    11.00000    0.07361    0.06134 =
         0.05153    0.00650   -0.01905    0.01112
O3    6    0.042112    0.731445   -0.122984    11.00000    0.11841    0.07855 =
         0.07705    0.01187    0.02279    0.02907
H1A   2    0.374087    0.613966   -0.083359    11.00000    0.07846
H1B   2    0.469717    0.646970   -0.033047    11.00000    0.06828
H2A   2    0.308582    0.655102   -0.241011    11.00000    0.14372
H2B   2    0.187298    0.661718   -0.155703    11.00000    0.11032
H3C   2    0.088234    0.777927   -0.136786    11.00000    0.23500
H3D   2    0.024016    0.700229   -0.060026    11.00000    0.24561
HKLF 4


REM  fe(1-tbbt)clo4dmf_a.res in P2(1)/n
REM R1 =  0.0454 for    3565 Fo > 4sig(Fo)  and  0.0491 for all    3890 data
REM    327 parameters refined using      3 restraints

END

WGHT      0.0734      1.3543

REM Highest difference peak  0.506,  deepest hole -0.483,  1-sigma level  0.066
Q1    1   0.6108  0.6964  0.6198  11.00000  0.05    0.51
Q2    1   0.7649  0.7552  0.7205  11.00000  0.05    0.43
Q3    1   0.7743  0.7601  0.6310  11.00000  0.05    0.41
Q4    1   0.5388  0.7784  0.5751  11.00000  0.05    0.37
Q5    1   0.4925  0.7642  0.7366  11.00000  0.05    0.34
Q6    1   0.6382  0.8164  0.7353  11.00000  0.05    0.31
Q7    1   0.7003  0.8371  0.7328  11.00000  0.05    0.28
Q8    1   0.2364  0.6423 -0.2602  11.00000  0.05    0.28
Q9    1   0.6339  0.7141  0.7236  11.00000  0.05    0.27
Q10   1   0.5650  0.7007  0.7428  11.00000  0.05    0.26
;
_shelx_res_checksum                65052
_shelx_hkl_file
;
   0   0   1    0.19    0.24
   0   0   2  186.95    8.82
   0   0   3    2.55    1.06
   0   0   4    9.39    1.80
   0   0   5    0.52    1.61
   0   0   6 1374.32   61.07
   0   0   7    0.63    0.92
   0   0   7   -0.20    1.08
   0   0   7   -0.40    2.66
   0   0   7    0.94    0.96
   0   0   8  125.62    6.02
   0   0   8  112.87    8.86
   0   0   8  110.61    6.16
   0   0  -8  122.25    9.91
   0   0   9   -1.27    1.71
   0   0  -9   -0.77    3.86
   0   0  -9    0.43    2.28
   0   0   9    2.07    1.52
   0   0   9   -1.13    3.12
   0   0 -10  645.68   33.91
   0   0  10  572.34   26.83
   0   0  10  638.84   26.83
   0   0  10  561.58   30.91
   0   0 -10  573.12   29.56
   0   0 -11   -2.07    5.40
   0   0  11    0.93    1.86
   0   0  11    1.62    2.27
   0   0  11   -1.43    4.09
   0   0  11    0.27    2.02
   0   0 -12  473.85   28.43
   0   0  12  394.55   24.55
   0   0  12  436.15   19.74
   0   0  13   -2.95    4.69
   0   0 -13    1.16    5.15
   0   0  13   -0.28    2.15
   0   0  14   34.61    3.49
   0   0  14   30.60    3.00
   0   0  15   -0.13    1.99
   0   0  15    1.19    1.54
   0   0  16    4.30    1.53
   0   0  16    3.22    1.14
   0  -1   0    0.24    0.31
   0   1  -1  210.07    9.05
   0   1   2 2120.48   90.08
   0   1   3 1565.90   67.30
   0   1   4  322.25   15.51
   0   1   5  667.78   30.63
   0   1   6  165.72    9.92
   0   1  -7  264.90   13.51
   0   1   7  251.83   14.32
   0  -1   7  257.99   11.59
   0   1   7  260.27   11.54
   0   1   7  243.86   11.70
   0   1  -8   14.04    2.79
   0   1  -8   24.49    5.02
   0   1   8   20.49    4.19
   0   1   8   21.65    1.88
   0  -1   8   14.50    1.79
   0   1   8   17.13    2.02
   0  -1  -9  125.18    8.94
   0   1  -9  114.01    8.26
   0   1  -9  127.15   10.75
   0   1   9  114.05    6.46
   0   1   9  121.50    9.71
   0  -1   9  123.60    6.25
   0  -1   9  118.26    6.44
   0  -1 -10   18.40    3.81
   0   1 -10   22.27    5.93
   0   1  10   10.91    4.39
   0  -1  10   24.37    2.52
   0   1  10   20.95    2.42
   0  -1  10   21.15    2.58
   0  -1  10   16.23    2.30
   0   1  10   15.44    2.59
   0  -1  11  123.87    6.73
   0   1  11  113.25    6.78
   0   1  11  123.53    7.10
   0  -1  11  126.56    7.02
   0   1  11  141.64    6.90
   0   1  11  135.41   11.00
   0   1 -11  131.57   12.67
   0  -1  12   55.21    4.09
   0   1  12   59.71    4.29
   0   1  12   47.60    7.56
   0   1 -12   69.15    9.89
   0  -1  13   26.25    2.92
   0   1  13   29.84    3.13
   0   1  13   29.29    5.94
   0   1 -13   26.13    7.23
   0   1  14   36.60    3.53
   0   1  14   39.49    3.34
   0  -1  14   38.63    3.13
   0   1  15   81.49    4.81
   0   1  15   75.47    4.49
   0  -1  15   78.04    4.34
   0   1  16    3.69    1.25
   0   1  16    2.15    1.55
   0  -2   0  551.54   24.29
   0  -2   1  300.87   12.91
   0  -2   1  292.94   12.82
   0   2   1  296.06   12.92
   0   2   2  502.58   21.73
   0  -2   2  486.48   21.68
   0   2  -2  493.31   21.18
   0   2   3  525.52   23.88
   0  -2   3  523.09   23.86
   0   2  -3  545.21   23.28
   0   2   4  207.00   10.79
   0  -2   4  211.65   10.83
   0   2  -4  215.35   10.13
   0   2   5   31.11    3.36
   0  -2   5   27.76    3.18
   0   2  -5   37.02    2.80
   0  -2   6   28.58    3.72
   0   2   6   29.61    3.80
   0   2  -6   31.51    3.00
   0  -2   7   99.31    5.21
   0  -2   7  109.62    5.32
   0   2   7  121.56    8.02
   0  -2   7  105.30    7.70
   0   2   7   97.60    5.30
   0  -2   7  101.18    5.34
   0   2  -7  105.66    6.61
   0   2  -8   19.24    2.92
   0  -2   8   21.65    1.98
   0   2  -8   11.72    3.96
   0  -2  -8   26.33    4.89
   0  -2   8   18.04    2.08
   0   2   8   18.87    2.08
   0  -2   8   20.58    4.13
   0   2   8   18.37    3.98
   0  -2   9   69.89    4.33
   0  -2   9   58.91    3.98
   0   2  -9   69.67    8.33
   0  -2  -9   70.42    8.21
   0   2   9   61.78    7.08
   0  -2   9   70.29    7.17
   0  -2   9   66.61    3.90
   0  -2   9   65.89    4.29
   0   2   9   65.86    4.24
   0  -2 -10  233.63   15.49
   0  -2  10  268.06   12.68
   0  -2  10  257.76   12.38
   0  -2  10  260.96   12.61
   0   2  10  260.30   12.62
   0  -2  10  261.34   12.20
   0   2  10  261.65   16.54
   0  -2  10  277.70   16.68
   0   2 -10  278.38   18.47
   0  -2 -10  263.58   18.41
   0  -2 -11  344.03   22.21
   0   2 -11  342.32   21.87
   0   2  11  314.22   19.30
   0  -2  11  288.92   18.91
   0   2  11  318.24   14.99
   0  -2  11  319.33   15.01
   0  -2  11  311.31   14.44
   0  -2 -11  289.01   18.14
   0  -2  11  306.77   14.88
   0  -2  12   82.74    8.88
   0   2  12   75.24    8.72
   0  -2  12   75.95    4.81
   0   2 -12   88.01   10.72
   0  -2 -12   79.98   10.73
   0   2  13   -3.54    4.21
   0  -2  13    2.78    4.32
   0   2  13    1.42    2.43
   0  -2  13    0.36    1.88
   0   2  14  127.81    7.13
   0  -2  14  135.25    7.11
   0   2  14  130.31    6.98
   0  -2  14  120.63    6.49
   0  -2  15    0.81    1.31
   0   2  15    0.34    1.66
   0   2  15   -0.50    1.95
   0  -2  15   -1.34    1.81
   0   2  16   44.49    2.94
   0  -2  16   41.55    2.89
   0   2  16   41.96    2.74
   0  -3   0    1.08    0.94
   0   3   1 1113.50   47.37
   0  -3   1 1120.23   47.34
   0   3   2 2724.52  118.87
   0  -3   2 2858.40  118.83
   0  -3   2 2825.78  118.57
   0   3   3  347.68   16.08
   0  -3   3  350.42   16.04
   0  -3   4  155.91    8.46
   0   3   4  154.28    8.46
   0   3  -4  162.29    7.66
   0   3   5  617.37   28.67
   0  -3   5  624.22   28.70
   0   3  -5  625.23   27.60
   0   3   6  603.20   26.42
   0   3   6  597.80   28.62
   0  -3   6  601.65   28.58
   0   3  -6  629.70   27.48
   0  -3   7  334.07   17.61
   0   3   7  332.85   17.50
   0  -3   7  337.34   14.92
   0   3  -7  349.86   16.30
   0  -3   7  312.93   14.85
   0  -3   7  331.09   14.92
   0  -3   7  342.28   14.68
   0   3   7  323.18   14.90
   0  -3  -8    8.62    4.12
   0   3  -8    9.64    3.84
   0  -3   8    9.98    1.50
   0  -3   8    7.77    1.57
   0   3   8    9.62    1.78
   0  -3   8    9.36    1.74
   0  -3   8    9.13    3.43
   0   3   8   11.52    3.54
   0  -3   8    7.85    1.65
   0  -3   9  328.69   14.63
   0  -3   9  338.08   14.83
   0  -3   9  310.40   14.50
   0  -3   9  310.71   18.01
   0   3   9  318.65   18.13
   0   3   9  292.61   14.54
   0  -3   9  305.48   14.22
   0  -3   9  315.08   14.60
   0  -3  -9  326.56   19.86
   0   3  -9  316.44   19.55
   0  -3 -10   94.12    8.74
   0  -3  10  102.47    5.86
   0  -3  10   94.38    5.61
   0  -3  10  106.80    9.07
   0   3  10   91.47    8.61
   0   3  10   94.14    5.68
   0  -3  10   97.71    5.28
   0  -3  10   90.64    5.70
   0   3 -10   95.20   10.17
   0  -3 -10  115.43   10.73
   0  -3  11  154.18    9.99
   0  -3  11  159.10    8.51
   0  -3 -11  166.50   12.38
   0   3 -11  153.08   13.94
   0  -3 -11  167.09   14.54
   0   3  11  166.27    8.65
   0  -3  11  161.06    8.15
   0  -3  11  160.57    8.62
   0  -3  11  169.80    8.81
   0  -3  11  152.00   12.09
   0   3  11  169.64   12.63
   0   3  12   55.69    7.78
   0  -3  12   50.53    7.11
   0  -3 -12   62.12    9.51
   0   3 -12   56.01    9.03
   0  -3  12   65.50    4.03
   0  -3 -12   55.98    7.27
   0  -3  13  159.79   12.64
   0   3  13  185.09   13.21
   0  -3  13  174.24    8.52
   0  -3  14  282.23   12.89
   0  -3  14  283.73   13.38
   0   3  14  282.01   13.41
   0  -3  15   11.87    2.16
   0   3  15   12.24    2.17
   0   3  15    9.47    2.04
   0  -4   0 5177.51  219.49
   0  -4   1   11.42    0.79
   0   4   1    9.12    0.78
   0   4  -1   10.02    0.86
   0  -4  -1   10.31    0.93
   0  -4   2 3004.53  125.96
   0   4   2 2924.53  125.99
   0  -4   2 3001.39  125.90
   0  -4   3   44.04    3.01
   0   4   3   45.00    3.06
   0  -4   3   43.04    2.73
   0   4   4 2959.13  126.62
   0  -4   4 2990.32  126.57
   0  -4   4 2958.45  125.90
   0   4   5    1.23    1.66
   0  -4   5    3.15    1.90
   0   4   6   19.24    1.74
   0  -4   6   12.14    2.72
   0   4   6   17.22    2.87
   0  -4   6   19.80    1.69
   0   4   7  131.44    6.72
   0  -4   7  134.88    6.76
   0  -4   7  138.55    6.51
   0   4  -7  138.50    9.73
   0  -4  -7  142.79    9.93
   0  -4   7  135.45    8.95
   0   4   7  145.04    9.18
   0  -4   7  141.51    6.83
   0  -4   8  262.09   11.59
   0  -4   8  242.33   11.83
   0   4   8  251.37   11.84
   0  -4  -8  267.78   16.21
   0   4  -8  253.80   15.88
   0  -4   8  261.95   11.95
   0   4   8  248.77   14.67
   0  -4   8  257.57   14.70
   0  -4   8  252.10   11.91
   0  -4   9    3.00    1.78
   0   4   9    4.79    1.77
   0  -4   9    7.02    1.86
   0   4  -9    2.80    3.54
   0  -4   9    3.21    2.21
   0  -4  -9    6.51    4.15
   0  -4   9    4.93    1.90
   0  -4   9    7.68    1.64
   0  -4   9    9.76    3.65
   0   4   9    3.11    3.09
   0  -4   9   13.75    1.99
   0  -4  10   84.40    7.96
   0   4  10   80.72    7.99
   0   4  10   78.91    4.93
   0  -4  10   79.36    4.87
   0  -4  10   80.42    4.51
   0  -4  10   77.31    5.07
   0   4 -10   84.27    9.11
   0  -4  10   77.90    4.93
   0  -4 -10   73.72    8.83
   0  -4  10   68.75    6.00
   0  -4 -10   75.00    5.00
   0  -4  11   -3.72    4.06
   0   4  11   -1.26    4.37
   0  -4  11    4.09    2.20
   0  -4  11   -0.23    1.72
   0  -4  11   -1.37    2.75
   0   4 -11   -0.91    4.43
   0  -4 -11    6.72    5.15
   0  -4  11    1.41    2.20
   0  -4 -11   -1.65    1.79
   0  -4 -11    6.04    3.94
   0   4  12  490.48   26.65
   0  -4  12  471.02   26.31
   0   4 -12  507.02   29.20
   0  -4 -12  477.71   29.39
   0  -4  12  513.36   21.96
   0   4  12  479.94   22.58
   0  -4 -12  464.46   27.26
   0   4  13   22.06    3.06
   0  -4  13   23.92    2.95
   0   4  13   25.85    3.28
   0  -4  13   24.84    2.40
   0  -4  14   50.39    3.19
   0   4  14   56.35    3.87
   0  -4  14   49.21    3.66
   0  -4  15   10.67    1.85
   0   4  15   11.00    1.91
   0  -5   0    0.22    1.33
   0  -5   1 1026.99   43.73
   0   5   1 1048.55   43.79
   0  -5  -1 1041.94   45.89
   0  -5   2  731.49   31.70
   0   5   2  734.54   31.77
   0  -5  -2  745.92   32.10
   0   5  -2  764.87   32.07
   0  -5  -2  690.84   32.96
   0   5   3   19.94    1.94
   0  -5   3   19.65    1.86
   0  -5   3   18.72    1.73
   0  -5   4  700.10   31.09
   0   5   4  687.45   31.11
   0  -5   4  703.01   30.58
   0   5   5  929.40   40.99
   0  -5   5  971.14   41.00
   0  -5   5  880.77   40.03
   0  -5   6   34.17    2.50
   0   5   6   34.61    3.96
   0  -5   6   43.12    4.05
   0  -5   6   39.41    3.20
   0   5  -6   46.79    4.73
   0  -5  -6   38.70    4.39
   0   5   6   37.11    2.58
   0  -5   7  591.65   25.83
   0  -5   7  611.23   25.60
   0   5   7  569.25   25.80
   0  -5   7  608.84   28.50
   0   5   7  590.06   28.39
   0  -5   7  581.62   26.92
   0   5  -7  604.08   29.56
   0  -5  -7  595.95   29.49
   0  -5   7  591.15   25.99
   0   5   8   48.68    3.26
   0  -5   8   49.94    3.24
   0  -5   8   48.34    2.99
   0  -5   8   46.96    3.44
   0   5   8   51.90    5.51
   0  -5   8   44.39    5.35
   0  -5  -8   52.54    6.19
   0   5  -8   49.62    6.24
   0  -5   8   44.04    4.16
   0  -5   8   52.35    3.44
   0  -5   9  150.97    7.59
   0  -5   9  157.86    7.31
   0   5   9  148.21    7.58
   0   5   9  147.07   10.47
   0  -5   9  147.76   10.41
   0  -5   9  153.58    7.87
   0  -5   9  150.70    7.78
   0  -5   9  138.04    8.67
   0  -5  -9  121.19   11.08
   0   5  -9  119.16   10.84
   0   5  10   60.01    4.21
   0  -5  10   68.21    3.91
   0  -5  10   63.38    4.26
   0  -5 -10   52.47    7.68
   0  -5  10   53.93    5.19
   0   5 -10   58.60    7.53
   0  -5  10   60.10    4.42
   0  -5  10   73.15    4.71
   0   5  10   56.32    6.80
   0  -5  10   55.18    6.62
   0  -5 -10   70.74    4.80
   0  -5  11   74.70    8.24
   0   5  11   88.51    8.53
   0  -5  11   98.25    5.75
   0  -5  11   88.22    4.91
   0  -5 -11   89.21    9.74
   0  -5 -11   82.52    9.81
   0   5 -11   72.31    9.20
   0  -5 -11   85.79    5.68
   0  -5  11   84.11    5.57
   0  -5  12    4.17    1.86
   0   5  12    5.31    2.75
   0   5  12    4.75    3.77
   0  -5  12   -2.31    4.03
   0  -5 -12    3.84    5.00
   0   5 -12    3.56    4.42
   0  -5 -12    2.44    3.77
   0  -5  12    3.92    2.26
   0  -5 -12    1.88    1.99
   0   5  13  491.11   24.00
   0  -5  13  550.87   23.36
   0  -5  13  529.30   23.70
   0   5  13  542.27   23.78
   0   5  14    1.62    2.25
   0   5  14    6.18    2.03
   0  -5  14    6.04    1.90
   0   5  15    2.74    1.67
   0   5  15    4.87    1.51
   0  -5  15    4.25    1.47
   0  -6   0 1991.13   86.10
   0  -6  -1   13.01    2.27
   0  -6  -2 1217.81   55.23
   0   6  -2 1252.27   53.50
   0  -6  -2 1188.63   53.53
   0   6   2 1259.14   53.23
   0  -6   2 1289.63   53.18
   0  -6   3  309.80   14.31
   0   6   3  315.42   14.41
   0   6  -3  319.14   14.84
   0  -6  -3  316.67   14.91
   0   6   4   16.64    2.05
   0  -6   4   15.62    1.99
   0  -6   4   17.83    1.97
   0  -6  -4   18.60    2.41
   0   6  -4   16.24    2.35
   0   6   5   52.76    4.20
   0  -6   5   51.77    4.06
   0   6  -5   56.57    4.78
   0  -6   5   50.61    3.63
   0  -6  -5   59.52    4.84
   0   6   6   31.00    2.30
   0  -6   6   32.31    2.05
   0   6   6   27.21    1.99
   0  -6   6   28.81    2.78
   0   6  -6   23.04    3.63
   0  -6  -6   31.75    4.05
   0   6   6   34.71    3.67
   0  -6   6   26.93    3.29
   0  -6   6   28.49    2.23
   0  -6   7  924.97   38.89
   0   6   7  880.48   38.85
   0  -6   7  923.20   38.60
   0  -6   7  861.45   39.07
   0  -6   7  910.60   40.00
   0   6  -7  883.77   42.42
   0  -6  -7  874.17   42.45
   0  -6   7  929.86   41.41
   0   6   7  932.63   41.52
   0  -6   8  330.48   15.02
   0   6   8  337.25   15.04
   0  -6   8  338.28   14.72
   0   6  -8  320.90   18.94
   0  -6  -8  319.59   18.89
   0  -6   8  320.20   16.13
   0  -6   8  320.80   15.23
   0   6   8  339.85   15.44
   0  -6   8  325.83   17.65
   0   6   8  332.85   17.83
   0  -6   9   25.34    2.48
   0   6   9   30.75    2.50
   0  -6   9   32.34    2.31
   0  -6  -9   19.86    4.74
   0  -6   9   17.59    3.05
   0   6  -9   23.27    4.95
   0  -6   9   20.07    4.44
   0   6   9   31.81    4.87
   0  -6   9   28.36    2.82
   0  -6 -10  321.12   21.11
   0   6 -10  324.65   21.01
   0  -6 -10  356.66   17.12
   0  -6  10  357.48   16.64
   0  -6  10  365.07   19.76
   0   6  10  347.13   19.58
   0  -6  10  357.30   15.86
   0   6  11   14.82    4.56
   0  -6  11   17.76    4.42
   0  -6 -11   28.64    2.87
   0  -6  11   25.44    3.11
   0  -6  11   23.97    2.35
   0  -6 -11   26.33    3.23
   0  -6 -11   20.01    5.44
   0   6 -11   20.31    5.65
   0  -6 -11   14.74    5.37
   0  -6  12  119.41    6.60
   0   6  12  129.84    6.67
   0  -6  12  115.88    7.07
   0  -6  12   98.37    9.21
   0   6  12  124.85    9.90
   0   6  12  124.24    7.18
   0  -6  12  132.87    6.27
   0  -6 -12  118.53   11.59
   0  -6 -12  111.16    7.04
   0  -6 -13   -0.34    1.81
   0  -6  13    0.23    1.84
   0   6  13   -1.18    1.86
   0   6  13    0.49    2.35
   0   6  14   76.42    4.89
   0  -6  14   80.25    4.46
   0   6  14   80.60    4.49
   0   6  15    2.83    1.27
   0   6  15    1.67    1.53
   0  -7   0   -0.80    1.56
   0  -7  -1  101.35    6.75
   0  -7  -2  338.26   18.13
   0  -7   2  363.23   15.61
   0   7   2  366.85   15.69
   0  -7  -3 1241.26   52.87
   0   7   3 1187.29   50.28
   0  -7   3 1196.70   50.19
   0  -7  -3 1104.85   50.75
   0   7  -3 1147.67   50.69
   0   7   4   19.08    2.14
   0  -7   4   21.22    2.17
   0  -7  -4   20.91    3.31
   0  -7  -4   16.31    2.37
   0   7  -4   17.22    2.35
   0  -7   5   32.82    3.05
   0   7   5   28.67    3.08
   0  -7   5   33.01    2.81
   0   7  -5   21.78    3.17
   0  -7  -5   30.87    3.62
   0   7   5   30.75    2.25
   0  -7   5   33.83    2.39
   0   7   6    7.84    1.46
   0   7   6    7.99    2.26
   0  -7   6    6.36    2.14
   0   7  -6    8.06    2.50
   0  -7   6    4.57    1.78
   0  -7  -6    5.41    2.57
   0  -7   6    9.44    1.17
   0  -7   6    6.16    1.40
   0  -7   7   22.89    3.66
   0   7   7   33.99    4.24
   0   7   7   37.25    2.38
   0  -7   7   36.48    2.42
   0   7  -7   31.08    4.51
   0  -7   7   34.42    3.30
   0  -7  -7   24.59    4.21
   0  -7   7   30.25    2.61
   0  -7   8    0.67    1.48
   0   7  -8    1.69    3.14
   0  -7  -8    2.27    2.95
   0  -7   8    3.21    2.05
   0   7   8    3.99    1.77
   0  -7   8    0.60    1.71
   0  -7   8    1.75    1.73
   0  -7   8    2.71    2.63
   0   7   8    1.58    2.64
   0  -7   8    3.01    1.36
   0   7   8    4.98    1.45
   0  -7   9  207.49   10.49
   0  -7   9  227.09    9.88
   0  -7   9  210.41   10.70
   0  -7   9  204.78   10.55
   0   7  -9  201.36   14.09
   0  -7  -9  207.55   14.45
   0   7   9  210.19   12.98
   0  -7   9  214.31   13.04
   0  -7  10  205.16    9.15
   0  -7 -10  194.01   10.61
   0   7 -10  175.24   13.75
   0  -7 -10  165.44   13.75
   0  -7 -10  195.67    9.91
   0  -7  10  180.87   12.22
   0   7  10  182.59   12.30
   0  -7  11  140.51    7.00
   0   7  11  114.67    9.52
   0  -7  11  135.19    9.89
   0  -7 -11  145.52    8.18
   0  -7 -11  128.42   12.28
   0  -7 -11  144.06    7.47
   0   7  12    6.35    2.57
   0  -7 -12    2.38    2.17
   0  -7  12   10.40    3.72
   0  -7  12    8.56    2.03
   0   7  12    7.07    2.10
   0  -7 -12   12.27    5.15
   0   7  13   15.97    2.71
   0  -7 -13   12.49    2.41
   0  -7  13   15.83    2.09
   0   7  13   13.65    2.09
   0   7  14    0.88    1.87
   0   7  14    1.04    1.41
   0   7  15   22.44    2.04
   0   7 -15   15.61    1.64
   0  -8   0 1319.43   58.33
   0  -8  -1  172.61   10.03
   0  -8  -2  521.23   25.34
   0  -8   3  125.28    6.04
   0  -8  -3  120.22    8.73
   0  -8  -3  133.53    6.39
   0  -8  -4  277.33   15.88
   0   8   4  287.92   13.09
   0  -8   4  281.51   12.93
   0  -8   4  301.20   13.16
   0   8  -4  265.05   13.56
   0  -8  -4  241.43   13.54
   0  -8   5   29.30    2.36
   0  -8  -5   25.46    4.48
   0   8   5   29.40    2.17
   0  -8  -5   22.30    3.11
   0   8  -5   30.10    3.35
   0   8   5   26.78    2.95
   0  -8   5   25.48    2.71
   0  -8   5   25.16    2.03
   0   8  -6  101.82    7.43
   0  -8  -6   94.86    7.31
   0   8   6  104.23    5.46
   0   8   6  119.05    6.87
   0  -8   6  107.77    6.57
   0  -8   6   95.74    5.34
   0  -8   7   51.27    3.30
   0  -8  -7   41.70    5.10
   0   8  -7   37.08    4.95
   0  -8   7   44.12    3.20
   0  -8   7   45.69    4.49
   0   8   7   44.16    4.52
   0  -8   8    6.36    1.71
   0   8  -8    4.45    3.00
   0  -8  -8   11.08    3.81
   0   8   8    8.39    2.04
   0  -8   8    5.03    2.84
   0   8   8   10.06    3.00
   0  -8   8   10.32    2.09
   0  -8  -9    8.33    3.87
   0   8  -9    5.74    3.68
   0  -8   9    8.95    2.34
   0  -8  -9   10.12    2.29
   0  -8   9    8.21    2.02
   0  -8   9   12.35    2.37
   0   8   9    9.21    3.29
   0  -8   9    9.42    3.34
   0  -8  10   21.13    4.13
   0   8  10   19.76    4.27
   0  -8  10   20.36    2.29
   0  -8  10   20.94    3.06
   0  -8 -10   25.06    2.93
   0  -8 -10   21.98    3.47
   0  -8 -11  111.07   11.19
   0  -8 -11  138.42    8.02
   0   8  11  131.82    6.68
   0  -8  11  132.67    6.67
   0  -8 -11  131.16   12.49
   0  -8 -11  123.09    7.14
   0  -8  11  124.20    7.42
   0  -8  12  192.05    9.22
   0   8  12  188.74    9.23
   0  -8 -12  201.57   10.43
   0   8  12  200.99    9.90
   0   8  13    8.32    2.26
   0   8  13    6.47    1.63
   0  -8 -13   10.43    2.39
   0   8  14   14.37    2.13
   0  -9   0    1.40    1.07
   0  -9   0    1.20    1.06
   0  -9  -1 1096.49   46.77
   0  -9   1 1115.56   46.92
   0  -9  -1 1019.89   48.90
   0  -9   1 1079.72   46.65
   0  -9   2  106.72    5.64
   0  -9  -2  103.37    7.55
   0  -9   2  102.07    5.38
   0  -9  -3  534.79   27.34
   0  -9  -3  568.77   24.32
   0  -9   3  534.43   24.53
   0  -9  -4    1.55    1.28
   0  -9  -4   -0.53    3.28
   0  -9   4    1.94    1.23
   0   9   4    1.19    1.00
   0  -9   4    2.04    1.48
   0  -9   5   84.44    4.78
   0  -9  -5   96.02    5.27
   0  -9   5   95.95    5.19
   0   9   5   91.65    4.84
   0  -9  -6  109.99    6.04
   0  -9   6  103.79    6.44
   0  -9  -6  117.05    9.78
   0  -9   6  105.47    5.60
   0  -9   7  601.15   28.05
   0  -9  -7  607.10   27.09
   0  -9   7  634.55   26.80
   0  -9  -7  517.49   29.11
   0  -9  -7  643.36   32.44
   0  -9   7  604.16   26.69
   0  -9  -8  114.28    6.48
   0   9   8  115.02    6.21
   0  -9  -8   99.90   10.13
   0  -9   8  102.45    5.93
   0  -9   8  114.64    6.13
   0  -9   8   95.88    7.25
   0  -9   9   10.22    2.52
   0  -9  -9   13.07    2.64
   0  -9  -9   16.08    3.17
   0  -9   9   10.68    2.16
   0  -9  10  134.49    8.00
   0  -9  10  145.97    7.09
   0  -9 -10  144.98    8.69
   0  -9 -10  147.29    7.96
   0  -9  11  283.11   12.43
   0  -9 -11  278.81   13.98
   0  -9 -11  242.32   18.32
   0  -9 -11  257.92   18.66
   0  -9  11  262.37   13.29
   0  -9 -11  264.46   13.16
   0  -9 -12   97.20    5.65
   0  -9  12  102.76    6.13
   0   9  12   99.08    5.76
   0  -9 -12   94.94    6.33
   0   9  13   35.69    2.98
   0  -9 -13   33.12    3.27
   0   9  14   13.17    1.81
   0 -10   0  589.60   25.55
   0 -10   0  565.45   25.39
   0 -10   0  577.62   25.22
   0 -10  -1   64.98    5.63
   0 -10   1   73.54    4.26
   0 -10  -1   66.58    4.05
   0 -10   1   67.81    3.92
   0 -10  -2  133.43    9.33
   0 -10   2  132.15    7.04
   0 -10   2  140.71    7.38
   0 -10   2  159.57    7.49
   0 -10  -3    8.05    3.18
   0 -10   3   11.25    1.93
   0 -10  -4  773.95   34.61
   0 -10   4  820.60   34.58
   0 -10  -4  781.64   38.64
   0 -10   4  777.74   34.98
   0 -10   5   77.86    4.34
   0  10   5   80.71    4.39
   0 -10  -5   93.94    8.97
   0 -10  -5   85.13    4.96
   0 -10   5   77.48    4.76
   0 -10   6   15.61    1.88
   0 -10  -6   18.12    2.41
   0 -10  -6   13.95    5.11
   0 -10   6   14.03    2.00
   0 -10   7  185.32    9.15
   0 -10   7  188.15    9.06
   0 -10  -7  184.85    9.59
   0 -10  -7  189.13   14.39
   0 -10   8   57.30    3.75
   0 -10   8   55.52    4.12
   0 -10  -8   53.07    4.26
   0 -10  -8   42.05    7.47
   0 -10   9   55.50    4.41
   0 -10  -9   55.96    4.94
   0 -10   9   58.88    3.96
   0 -10  -9   59.85    4.44
   0 -10 -10   74.20    9.56
   0 -10 -10   76.85    5.23
   0 -10  10   72.12    5.20
   0 -10 -10   89.95    6.14
   0 -10 -11   10.44    2.82
   0 -10 -11   10.60    5.56
   0  10  11    6.85    2.29
   0 -10  11    9.79    2.52
   0 -10 -11    6.41    2.20
   0 -10 -12   51.99    4.42
   0  10  12   55.07    3.74
   0 -10  12   44.47    3.84
   0 -10 -12   51.49    3.61
   0 -10 -13   56.35    4.20
   0  10  13   65.01    3.80
   0  10  14   21.43    1.82
   0 -11   0   17.06    1.77
   0 -11   0   26.24    2.10
   0 -11   1   11.63    1.69
   0 -11   1   14.58    2.02
   0 -11  -1   11.59    1.86
   0 -11  -1   13.31    1.90
   0 -11   2   98.63    5.42
   0 -11  -2   85.41    7.38
   0 -11  -2  103.52    5.62
   0 -11   2   98.13    5.73
   0 -11   2   98.31    5.67
   0 -11   3 1026.11   44.73
   0 -11   3 1103.32   45.33
   0 -11   4   10.84    1.78
   0 -11  -4   10.00    3.93
   0 -11  -4    7.51    1.89
   0 -11   4    4.68    2.02
   0 -11  -5    4.81    3.85
   0 -11  -5    7.85    2.07
   0 -11   5    6.94    1.84
   0 -11  -6    2.42    2.02
   0 -11   6    0.63    1.27
   0 -11  -6    1.54    4.37
   0 -11  -7    7.76    2.47
   0 -11   7    6.75    1.61
   0 -11  -7    2.50    4.96
   0 -11   8   11.06    1.85
   0 -11  -8   12.19    5.71
   0 -11  -8   11.41    3.02
   0 -11  -8   12.42    2.72
   0 -11   8    8.40    2.30
   0 -11   9   60.45    4.62
   0 -11  -9   68.82    4.90
   0 -11  -9   74.26    5.50
   0 -11 -10   18.06    2.84
   0 -11  10   15.39    2.83
   0 -11 -10   16.25    3.27
   0  11  11    3.62    1.90
   0 -11  11    3.39    2.13
   0 -11 -11    5.06    2.24
   0 -11 -11    4.74    2.69
   0  11  12    7.29    1.81
   0 -11  12    6.43    2.00
   0 -11 -12    8.29    1.83
   0 -11 -12   10.29    2.57
   0  11  13    7.37    1.47
   0 -12   0  265.95   12.43
   0 -12   0  269.99   12.86
   0 -12   1   12.31    1.82
   0 -12  -1   10.26    1.81
   0 -12  -1   15.46    2.14
   0 -12   1   15.86    2.31
   0 -12  -1   12.96    2.08
   0 -12   2  229.16   10.70
   0 -12  -2  207.05   10.45
   0 -12   2  216.90   10.65
   0 -12   3  386.39   17.59
   0 -12   3  421.26   18.27
   0 -12  -4   27.03    5.22
   0 -12   4   28.61    2.60
   0 -12   4   32.81    3.34
   0 -12  -4   26.03    2.87
   0 -12  -5   25.45    5.69
   0 -12  -5   25.50    2.91
   0 -12   5   19.22    2.53
   0 -12   5   24.12    2.54
   0 -12  -6   27.58    3.05
   0 -12  -6   32.25    3.40
   0 -12  -6   31.49    6.65
   0 -12  -7  336.75   16.00
   0 -12  -7  315.36   20.82
   0 -12   8   51.97    3.97
   0 -12  -8   48.20    4.22
   0 -12  -8   46.58    4.52
   0 -12  -8   53.96    8.14
   0 -12   9   30.29    3.14
   0 -12  -9   31.63    3.49
   0 -12  -9   29.28    6.73
   0 -12  -9   28.84    3.78
   0  12  10   31.88    2.72
   0 -12 -10   28.35    3.70
   0 -12  10   30.34    3.13
   0 -12 -10   28.22    3.32
   0  12  11   21.21    2.21
   0 -12 -11   26.31    3.20
   0 -12 -11   20.01    2.59
   0 -12  11   23.71    2.59
   0  12  12   94.53    4.88
   0 -12 -12   97.69    5.80
   0 -13   0    0.75    1.50
   0 -13   0    1.02    1.80
   0 -13   1  342.74   16.65
   0 -13  -1  358.76   16.62
   0 -13   1  356.68   17.09
   0 -13  -1  393.24   17.24
   0 -13   1  389.45   17.10
   0 -13  -2    8.77    2.14
   0 -13  -2    9.06    2.01
   0 -13   2   11.51    2.31
   0 -13  -2   10.55    2.37
   0 -13   2    9.16    2.28
   0 -13   3    5.82    1.62
   0 -13   3    7.79    2.21
   0 -13  -3   10.74    3.62
   0 -13   4   14.22    2.06
   0 -13  -4   10.97    4.42
   0 -13   5  505.82   22.00
   0 -13  -5  447.91   26.02
   0 -13  -5  455.55   21.99
   0 -13   5  477.91   21.42
   0 -13  -6  168.30    9.23
   0 -13  -6  151.22    8.82
   0 -13  -6  170.56    9.01
   0 -13  -6  148.94   12.51
   0 -13  -7  677.71   30.75
   0 -13  -7  672.02   30.38
   0 -13  -7  663.80   35.38
   0 -13  -7  675.64   30.31
   0 -13  -8   12.41    5.09
   0 -13  -8   15.08    2.92
   0 -13   8    7.85    2.26
   0 -13  -9   66.65    5.31
   0 -13  -9   68.95    4.90
   0 -13   9   63.59    4.27
   0 -13 -10    2.61    2.60
   0 -13 -10   -0.35    1.93
   0 -13  10    1.16    1.81
   0 -13 -11  105.92    6.21
   0 -13 -11   91.96    5.53
   0 -13  11   99.91    5.34
   0 -13 -12   16.04    2.31
   0 -14   0   13.82    2.25
   0 -14   0   14.56    2.66
   0 -14   1   76.59    4.89
   0 -14  -1   68.26    4.45
   0 -14   1   73.38    4.64
   0 -14   1   75.05    4.94
   0 -14  -1   72.11    5.09
   0 -14   2    7.93    1.68
   0 -14   2    9.23    2.25
   0 -14  -2   10.70    2.07
   0 -14  -2    6.67    2.32
   0 -14  -2    9.47    2.09
   0 -14   3   48.41    3.94
   0 -14  -3   39.26    3.97
   0 -14  -3   44.30    3.79
   0 -14  -3   51.88    4.29
   0 -14  -3   53.44    3.82
   0 -14  -4    7.31    2.36
   0 -14   4   11.01    2.50
   0 -14  -4    7.32    4.19
   0 -14  -5   59.74    4.72
   0 -14  -5   55.60    4.68
   0 -14   5   62.81    4.41
   0 -14  -5   59.64    4.71
   0 -14  -5   45.23    6.89
   0 -14  -6   33.07    3.71
   0 -14  -6   38.56    3.99
   0 -14  -6   43.89    3.91
   0 -14  -7    2.76    2.35
   0 -14  -7    2.61    2.02
   0 -14  -7    3.58    3.95
   0 -14   7    6.47    1.98
   0 -14  -7    3.50    2.39
   0 -14  -8    6.17    2.61
   0 -14  -8    1.41    3.93
   0 -14  -8    2.00    2.35
   0 -14   8    4.78    1.98
   0 -14   9   13.76    2.11
   0 -14  -9   18.75    2.89
   0 -14  10    2.61    1.55
   0 -14 -10    3.31    1.99
   0 -14 -10    6.85    2.49
   0 -14 -11    2.93    1.96
   0 -14 -12   51.00    3.43
   0 -15   0    1.45    1.87
   0 -15   0    0.89    1.94
   0 -15   0   -2.18    2.34
   0 -15   1   11.95    2.43
   0 -15  -1   18.22    2.36
   0 -15  -1   13.52    2.67
   0 -15   1   12.62    2.61
   0 -15   2   46.38    3.81
   0 -15  -2   41.85    3.50
   0 -15  -2   45.53    3.54
   0 -15  -2   47.36    4.09
   0 -15   3   80.85    5.63
   0 -15  -3   72.69    5.14
   0 -15   3   82.37    5.24
   0 -15  -3   84.46    5.75
   0 -15  -3   77.43    4.91
   0 -15  -4   17.39    3.29
   0 -15  -4   14.65    2.77
   0 -15  -4   17.13    3.11
   0 -15   4   17.44    2.86
   0 -15  -4   17.49    2.75
   0 -15  -5  212.14   10.99
   0 -15  -5  234.38   11.42
   0 -15  -5  216.60   11.22
   0 -15   5  207.59   10.74
   0 -15  -5  190.12   10.89
   0 -15  -6  293.86   14.19
   0 -15  -6  286.32   14.11
   0 -15  -6  264.83   17.30
   0 -15  -6  239.02   17.07
   0 -15  -6  296.45   14.18
   0 -15  -7   98.54    6.33
   0 -15  -7  101.69    6.20
   0 -15   7   94.40    5.26
   0 -15  -7   88.10    8.87
   0 -15  -7   91.88    5.92
   0 -15  -8   11.56    2.74
   0 -15  -8    6.98    2.53
   0 -15   8    5.80    1.78
   0 -15  -9   70.31    4.85
   0 -15   9   56.14    3.58
   0 -15 -10    0.51    2.11
   0 -15 -10    2.17    2.10
   0 -15 -11   24.49    2.51
   0 -15 -11   26.75    2.53
   0 -16   0  280.07   13.33
   0 -16   0  278.50   13.57
   0 -16   0  262.27   12.95
   0 -16   1   92.05    5.57
   0 -16  -1   97.23    6.00
   0 -16  -1   78.46    5.25
   0 -16  -2   88.86    5.46
   0 -16  -2   90.87    6.14
   0 -16   2   93.46    6.33
   0 -16   2   92.13    5.65
   0 -16  -3   24.36    2.85
   0 -16  -3   18.70    2.67
   0 -16   3   17.47    3.07
   0 -16  -3   21.89    3.40
   0 -16  -3   21.30    3.21
   0 -16  -4    9.88    2.43
   0 -16  -4    4.38    2.27
   0 -16  -4   13.83    2.96
   0 -16   4    8.66    2.49
   0 -16  -4   11.14    2.99
   0 -16  -5   39.17    3.49
   0 -16  -5   40.22    3.84
   0 -16   5   42.15    3.61
   0 -16  -5   40.60    4.08
   0 -16  -5   44.59    4.14
   0 -16  -6   13.54    2.79
   0 -16  -6   19.42    3.00
   0 -16  -6   16.14    2.54
   0 -16  -7  143.58    8.10
   0 -16  -7  136.39    8.24
   0 -16  -8   39.91    3.80
   0 -16  -8   36.55    3.62
   0  16   9    6.25    1.67
   0 -16  -9    8.61    1.89
   0 -16  -9    7.00    2.25
   0 -16  -9    6.81    2.21
   0 -16 -10   71.88    4.46
   0 -16 -10   68.04    3.91
   0 -17   0    2.23    2.07
   0 -17   0    0.60    2.22
   0 -17   1   24.55    2.86
   0 -17  -1   21.89    2.95
   0 -17  -1   20.63    2.78
   0 -17  -1   25.36    3.27
   0 -17  -1   23.71    3.64
   0 -17   1   31.22    3.78
   0 -17  -2    8.03    2.25
   0 -17   2   10.73    2.99
   0 -17  -2    9.65    2.93
   0 -17   2    5.97    2.20
   0 -17  -2    8.06    2.63
   0 -17  -3   53.02    3.96
   0 -17  -3   54.30    4.53
   0 -17  -3   50.92    4.56
   0 -17   3   50.93    4.42
   0 -17  -4   75.31    4.66
   0 -17  -4   71.63    5.41
   0 -17   4   67.74    4.99
   0 -17  -4   75.72    5.49
   0 -17  -4   73.35    4.85
   0 -17  -5  276.80   13.25
   0 -17  -5  284.65   13.97
   0 -17  -5  299.85   14.15
   0 -17  -5  272.13   13.62
   0 -17  -6    3.41    1.86
   0 -17  -6    4.65    2.46
   0 -17  -6    3.86    2.13
   0 -17  -6    5.18    2.42
   0 -17  -7  152.36    7.77
   0 -17  -7  163.44    8.36
   0 -17  -7  152.46    8.15
   0 -17  -8   -1.23    1.97
   0 -17  -8    2.83    1.52
   0 -17  -9    1.25    1.23
   0 -17  -9    1.74    1.64
   0  17   9    2.35    1.25
   0 -17  -9    4.74    1.88
   0 -18   0  471.34   21.39
   0 -18   1    5.71    2.01
   0 -18  -1    4.72    2.09
   0 -18   1    4.61    2.62
   0 -18  -1    1.64    2.44
   0 -18  -1    0.79    2.32
   0 -18  -2   68.38    5.02
   0 -18  -2   66.00    4.64
   0 -18  -2   66.77    5.27
   0 -18   2   78.68    5.29
   0 -18  -2   62.11    4.30
   0 -18  -3   -2.39    2.38
   0 -18  -3    1.69    2.10
   0 -18  -3    2.22    2.51
   0 -18   3    0.81    2.26
   0 -18  -3   -1.45    1.94
   0 -18  -4   35.62    3.68
   0 -18  -4   35.23    2.94
   0 -18   4   30.80    3.26
   0 -18  -4   29.90    3.65
   0 -18  -5   13.81    2.60
   0 -18  -5   10.12    2.60
   0 -18  -5    7.76    1.89
   0 -18  -6  175.56    8.53
   0 -18  -6  153.89    7.73
   0 -18  -6  154.52    8.30
   0 -18  -6  149.46    8.00
   0 -18  -7    7.39    1.55
   0 -18  -7    6.44    2.01
   0 -18  -7    5.95    1.61
   0 -18  -7    4.79    1.77
   0 -18  -8   14.15    1.63
   0  18   8   17.65    1.83
   0  19   0    3.63    1.79
   0 -19   0   -0.86    2.45
   0  19  -1   40.12    2.94
   0 -19   1   40.46    3.93
   0 -19  -1   39.75    3.98
   0 -19  -2   21.58    3.25
   0 -19   2   25.24    3.17
   0 -19  -3   81.15    5.06
   0 -19  -3   70.00    5.23
   0 -19   3   72.16    5.00
   0 -19  -4    2.00    2.00
   0 -19  -4    0.41    1.50
   0 -19  -4    0.54    1.74
   0 -19  -4    1.87    2.16
   0 -19  -5   50.10    3.27
   0 -19  -5   54.27    4.08
   0 -19  -5   61.66    4.10
   0 -19  -6    8.88    1.93
   0 -19  -6    7.15    1.42
   0 -19  -7   14.47    1.56
   0  19   7   14.56    1.76
   0 -19  -7   19.26    2.16
   0 -20   0   33.39    3.49
   0  20   0   33.52    2.63
   0  20   1    1.00    1.68
   0 -20   1    0.36    2.17
   0  20   2    7.75    1.93
   0 -20  -2    8.98    2.31
   0 -20   2    7.55    2.28
   0  20   3   16.09    2.15
   0 -20  -3   13.22    2.49
   0  20   4   15.26    2.03
   0 -20  -4   14.19    2.31
   0 -20  -5    0.13    1.53
   0  20   5    1.19    1.45
   0 -20  -5   -0.36    1.53
   0 -21   0    0.60    1.79
   0 -21   1    1.85    1.78
   0  21   1    6.86    1.43
   0 -21   2   11.46    1.94
   0 -21  -2    7.84    1.94
   0  21   2   11.71    1.66
   0 -21  -3    2.38    1.67
   0  21   3    1.34    1.32
  -1   0  16   -1.10    1.64
   1   0 -16   -0.94    2.10
  -1   0  15    8.70    2.28
  -1   0  15   13.64    1.90
  -1   0  14   -1.21    2.05
  -1   0  13   54.26    4.40
  -1   0  13   55.39    4.02
  -1   0  13   49.61    7.83
  -1   0  12    0.70    2.10
  -1   0  12    2.39    4.46
  -1   0  12    0.60    2.47
   1   0 -11   43.78    5.64
   1   0 -11   36.45    7.74
  -1   0  11   46.20    7.27
  -1   0  11   43.35    3.98
   1   0 -10   -1.03    2.64
   1   0 -10    3.78    5.14
  -1   0  10   -0.69    3.98
  -1   0  10    2.27    1.53
  -1   0  10    1.35    1.90
  -1   0   9  353.58   21.60
   1   0  -9  382.00   20.78
  -1   0   9  373.03   18.02
  -1   0   9  433.38   18.02
   1   0  -9  416.26   23.99
  -1   0   9  400.79   17.89
  -1   0   9  385.54   17.69
  -1   0   8    0.55    1.14
  -1   0   8    2.48    1.32
  -1   0   8    0.52    2.98
   1   0  -8   -0.41    2.04
   1   0  -8    7.32    3.82
  -1   0   7   23.50    1.86
  -1   0   7   23.81    1.97
  -1   0   7   20.62    3.82
   1   0  -7   24.51    3.29
   1   0  -7   20.15    4.04
  -1   0   6    0.36    2.09
   1   0  -6    0.89    2.24
   1   0  -6    2.93    1.62
   1   0  -5  584.89   26.84
   1   0  -5  558.52   25.70
  -1   0   5  522.99   26.00
   1   0  -4    1.18    1.18
   1   0  -4    0.86    1.30
  -1   0   4    0.24    1.29
   1   0  -3 2321.65   97.01
  -1   0   3 2209.53   97.32
   1   0  -2    0.70    0.69
  -1   0   2    0.31    0.85
  -1   0   1  270.71   12.76
  -1   0   0    0.03    0.28
   1   0   1 1933.34   81.99
   1   0   2   -0.11    0.71
   1   0   3 5376.22  227.40
   1   0   4    0.98    1.26
   1   0   5  211.35   11.30
   1   0   6    2.84    2.17
   1   0   7  359.61   19.54
   1   0   7  373.19   17.04
   1   0   7  395.32   16.94
   1   0   8    1.31    1.45
   1   0   8    0.47    2.68
   1   0   9  125.43    9.79
   1   0   9  117.12    6.46
   1   0   9  120.22    6.29
   1   0   9  118.61    6.50
  -1   0 -10   -1.36    2.47
   1   0  10    0.47    1.89
   1   0  10   -0.62    4.09
  -1   0 -10    2.72    4.93
   1   0  10   -0.13    1.77
   1   0  11  333.38   16.19
   1   0  11  320.64   20.29
  -1   0 -11  378.16   23.75
   1   0  11  359.38   16.10
   1   0  12   -1.02    2.37
   1   0  12   -3.27    2.90
   1   0  12   -0.96    2.02
   1   0  12   -0.71    4.15
  -1   0 -12    1.13    5.50
   1   0  13    6.40    2.25
   1   0  13    6.57    2.66
   1   0  13    3.52    3.94
   1   0  14    2.10    1.96
   1   0  14   -2.44    2.38
   1   0  15  322.47   15.03
   1   0  15  330.73   15.33
   1   0  15  341.21   14.81
  -1   1  16   35.12    2.67
  -1   1  16   34.13    2.32
  -1   1  15    1.77    1.90
  -1  -1  15    2.50    1.37
  -1   1  15    2.08    1.60
  -1  -1  14    4.30    1.82
  -1   1  14    1.98    2.00
  -1   1  13    3.90    4.53
  -1   1  13    1.36    2.46
  -1  -1  13    1.63    2.06
  -1   1  13   -0.44    2.20
  -1   1  12  452.33   25.84
  -1   1  12  445.61   20.74
  -1  -1  12  441.68   20.04
   1  -1 -11  126.57   10.41
  -1   1  11  134.86   11.74
  -1  -1  11  146.59    7.47
  -1   1  11  139.22    7.94
   1   1 -10  486.16   26.79
  -1   1  10  410.93   23.70
   1   1 -10  397.66   21.88
   1  -1 -10  409.03   22.62
  -1  -1  10  425.93   19.00
  -1   1  10  419.51   19.42
  -1  -1   9  195.29    8.97
  -1   1   9  170.76   12.36
   1  -1  -9  157.21   11.37
   1   1  -9  177.34   11.17
  -1  -1   9  174.44    8.63
  -1   1   9  181.52    8.60
   1   1  -9  188.80   14.03
  -1  -1   9  175.35    8.79
  -1   1   9  167.31    8.96
   1   1  -8 1115.88   50.58
   1  -1  -8 1152.37   51.27
   1   1  -8 1174.91   53.56
  -1   1   8 1135.37   47.76
  -1  -1   8 1091.85   47.80
  -1   1   8 1003.73   51.52
  -1  -1   8 1110.12   47.93
  -1   1   8 1124.23   47.88
  -1  -1   7 1209.05   51.53
  -1   1   7 1193.95   51.45
   1   1  -7 1225.82   56.08
  -1   1   7 1199.88   51.53
   1  -1  -7 1215.43   54.40
   1   1  -7 1201.44   53.81
  -1   1   7 1124.43   54.63
  -1   1   7 1223.35   51.38
  -1  -1   7 1203.26   51.43
   1   1  -6  116.80    8.40
  -1   1   6  106.55    7.73
   1   1  -6  102.64    6.86
   1  -1  -6  120.21    7.54
   1   1  -5  247.43   12.66
   1   1  -5  274.93   14.14
  -1   1   5  238.30   13.15
   1   1  -4 1078.78   47.38
   1   1  -4 1121.93   48.53
  -1   1   4 1063.35   47.94
   1   1  -3 3156.47  127.49
  -1   1   3 2887.09  127.00
   1   1  -3 2937.54  126.49
   1   1  -2  219.11   11.12
  -1   1   2  232.87   11.03
  -1   1   1  484.61   21.35
   1  -1  -1  469.62   20.75
   1   1   0  262.80   12.21
  -1  -1   0  266.24   11.66
   1   1   1   21.85    1.61
   1   1   1   20.51    1.53
   1   1   2 2239.04   95.15
   1   1   3 2433.01  103.73
   1   1   4 1964.31   84.51
   1   1   5   80.01    5.60
   1   1   6  342.66   17.40
   1  -1   7    4.50    1.18
   1  -1   7    5.35    1.26
   1   1   7    4.63    2.72
   1   1   7    4.52    1.24
   1  -1   8   25.00    2.09
   1   1   8   17.70    4.04
   1   1   8   20.40    2.18
   1  -1   8   21.16    2.13
   1   1   9   41.42    5.85
  -1   1  -9   42.29    4.54
   1   1   9   46.32    3.32
   1  -1   9   43.93    3.40
   1  -1   9   43.77    3.20
   1   1   9   46.60    3.45
   1   1  10   77.61    4.71
   1  -1  10   66.51    4.77
   1   1  10   75.19    8.07
   1  -1  10   72.77    4.56
  -1   1 -11  495.28   29.02
   1   1  11  482.24   21.51
   1  -1  11  467.79   21.68
   1   1  11  481.19   26.22
   1  -1  11  467.29   21.33
   1  -1  12  139.05    7.41
   1   1  12  134.60    7.81
   1   1  12  140.23    7.42
   1  -1  12  138.69    7.65
   1   1  12  160.33   12.24
  -1   1 -12  125.11   13.27
   1   1  13   52.25    4.21
   1   1  13   50.22    7.00
   1   1  13   53.04    4.08
   1  -1  13   48.79    3.81
   1   1  14  255.08   12.40
   1   1  14  253.57   12.17
   1  -1  14  257.86   12.00
   1   1  15   10.91    2.25
   1  -1  15   15.05    1.88
   1   1  15   12.20    1.96
  -1  -2  15    3.12    1.84
  -1   2  15    4.61    2.09
  -1   2  15    5.54    1.86
  -1   2  14   68.17    4.40
  -1  -2  14   56.82    3.70
  -1  -2  13   -0.73    4.45
  -1   2  13    7.49    5.04
  -1   2  13    5.70    2.54
  -1  -2  13    7.18    2.04
  -1   2  12   16.69    2.89
  -1  -2  12   20.33    3.11
   1  -2 -12   11.58    4.21
  -1  -2  12   12.56    2.32
  -1  -2  12   14.95    5.54
  -1   2  12   12.29    5.43
  -1  -2  12   13.00    3.86
  -1   2  11  206.07   10.29
  -1  -2  11  177.23   10.09
  -1  -2  11  202.14    9.63
  -1  -2  11  200.87    9.85
   1   2 -11  211.38   16.60
   1  -2 -11  187.50   15.99
  -1   2  11  213.17   14.67
  -1  -2  11  203.44   14.35
   1  -2 -11  181.59   13.36
   1  -2 -10    4.24    3.25
  -1   2  10    2.13    2.26
  -1  -2  10    1.14    2.09
  -1  -2  10    5.13    2.02
  -1  -2  10    3.43    1.79
   1  -2 -10    2.78    4.76
   1   2 -10    4.55    4.74
  -1  -2  10    3.93    3.66
  -1   2  10   -1.33    4.09
  -1   2   9  134.32   10.70
  -1  -2   9  129.60   10.36
   1  -2  -9  129.68   10.03
  -1  -2   9  137.49    7.27
  -1   2   9  132.46    7.21
  -1  -2   9  140.99    7.16
   1  -2  -9  137.05   11.85
   1   2  -9  132.10   11.66
  -1  -2   9  132.71    6.97
  -1  -2   9  146.34    7.30
   1  -2  -8    5.26    4.18
   1   2  -8    4.56    3.70
  -1  -2   8    8.64    1.51
  -1   2   8    7.29    1.38
   1   2  -8   10.17    2.59
   1  -2  -8    6.27    3.17
  -1  -2   8    5.10    1.39
  -1   2   8    4.08    3.22
  -1  -2   8    6.52    3.38
   1   2  -7 1367.11   62.12
   1  -2  -7 1267.73   61.77
  -1   2   7 1396.78   57.57
  -1   2   7 1319.22   60.93
  -1  -2   7 1298.47   60.79
  -1  -2   7 1296.27   57.74
  -1   2   7 1386.48   57.68
   1   2  -7 1330.47   59.82
  -1  -2   6   26.94    3.64
  -1   2   6   30.48    3.93
   1  -2  -6   27.82    4.36
   1   2  -6   32.84    4.42
   1   2  -6   29.50    3.21
  -1  -2   6   30.31    2.11
  -1   2   5  256.38   13.01
  -1  -2   5  235.82   12.85
   1   2  -5  235.81   12.15
   1   2  -5  251.28   13.58
   1  -2  -5  244.03   13.54
  -1  -2   4   92.69    5.90
  -1   2   4   84.17    5.75
   1   2  -4   86.21    5.25
   1   2  -4   93.30    6.28
   1  -2  -4  105.74    6.57
   1   2  -3 2680.20  112.66
   1  -2  -3 2583.21  112.68
  -1  -2   3 2627.78  112.24
  -1   2   3 2615.45  112.25
   1   2  -2  898.72   39.25
   1  -2  -2  864.09   39.26
  -1   2   2  906.28   39.05
  -1  -2   2  899.67   39.00
   1  -2  -1 3265.38  140.44
  -1  -2   1 3325.09  140.32
  -1   2   1 3337.15  140.37
   1  -2   0   93.50    4.75
   1   2   0   90.41    4.72
  -1  -2   0   92.40    4.45
   1  -2   0   86.74    4.46
   1  -2   1 1693.88   72.89
   1   2   1 1757.18   72.90
   1   2   1 1713.39   73.00
   1  -2   1 1702.69   72.99
   1   2   2 2307.48   99.38
   1  -2   2 2374.24   99.40
   1   2   3    5.98    1.37
   1  -2   3    4.50    1.25
   1   2   4  690.67   31.08
   1  -2   4  696.31   31.07
   1  -2   5   74.16    5.36
   1   2   5   85.05    5.66
   1  -2   6  348.25   17.42
   1   2   6  340.17   17.43
   1   2   7   11.82    1.54
   1  -2   7    8.00    1.47
   1   2   7    7.65    2.69
   1  -2   7   10.27    2.87
   1  -2   7    8.77    1.39
   1  -2   8    6.95    1.52
   1  -2   8    5.52    1.43
   1  -2   8    5.16    1.56
   1   2   8    5.12    1.54
   1   2   8    8.24    3.17
   1  -2   8    6.41    3.25
  -1   2  -8    3.41    1.91
   1   2   9    5.18    1.84
   1  -2   9    5.78    1.91
   1  -2   9    9.56    1.86
   1   2   9    6.84    1.96
   1   2   9    6.98    3.72
   1  -2   9    3.75    3.71
   1  -2   9    2.90    1.57
   1  -2   9    3.83    1.86
   1   2  10  280.59   13.84
   1  -2  10  304.80   13.74
   1   2  10  288.96   17.75
   1  -2  10  287.22   17.73
   1  -2  10  301.97   14.19
   1   2  10  292.57   13.78
  -1  -2 -10  318.20   20.31
  -1   2 -10  302.91   19.71
   1   2  11  647.12   29.17
   1  -2  11  654.99   29.61
   1  -2  11  685.06   29.21
   1   2  11  635.68   33.91
   1  -2  11  670.63   34.06
  -1  -2 -11  628.75   33.30
  -1  -2 -11  716.94   37.48
  -1   2 -11  672.58   36.77
   1   2  12    4.32    2.76
   1  -2  12    2.48    2.56
   1  -2  12    3.01    2.16
   1   2  12    4.03    1.89
  -1  -2 -12   15.32    6.51
  -1   2 -12    2.13    5.30
   1   2  12    7.60    4.61
   1  -2  12    6.18    4.58
   1  -2  12    4.72    2.23
   1   2  13  278.97   13.06
   1  -2  13  262.56   12.96
   1   2  13  260.65   17.10
   1  -2  13  287.92   17.56
   1  -2  13  260.47   12.56
   1   2  14    9.99    2.60
   1  -2  14   12.11    2.58
   1  -2  14   10.01    2.00
   1   2  15  114.52    5.96
   1  -2  15  107.74    5.89
   1  -2  15  108.51    5.47
   1   2  15  100.01    5.70
  -1  -3  15    3.46    1.90
  -1   3  15    2.20    1.88
  -1   3  15    1.44    1.87
  -1  -3  14   88.73    4.73
  -1   3  14   90.08    5.47
  -1   3  13   33.72    6.22
  -1  -3  13   30.43    6.00
  -1  -3  13   38.52    2.89
  -1   3  13   30.31    3.60
  -1  -3  12  217.86   10.39
  -1  -3  12  180.87   14.16
  -1   3  12  184.94   14.32
  -1  -3  12  199.20   12.36
   1  -3 -12  180.05   13.97
  -1  -3  12  196.66   10.48
  -1   3  12  218.85   10.63
  -1  -3  12  207.28    9.87
  -1  -3  11    2.05    1.78
  -1   3  11    4.91    4.22
  -1  -3  11    2.05    3.92
   1  -3 -11    2.82    3.83
   1  -3 -11   -4.09    5.72
   1   3 -11   -1.97    5.14
  -1  -3  11    0.42    3.22
  -1  -3  11    3.09    2.04
  -1   3  11    1.91    2.14
  -1  -3  11    3.61    2.37
   1  -3 -10  476.62   26.32
  -1   3  10  507.56   26.51
  -1  -3  10  485.34   26.12
   1  -3 -10  503.96   28.56
   1   3 -10  496.29   28.22
  -1  -3  10  492.00   21.89
  -1  -3  10  472.25   21.98
  -1  -3  10  488.98   21.51
  -1   3  10  478.00   22.04
  -1  -3   9   83.79    4.89
  -1  -3   9   82.09    4.67
   1  -3  -9   79.41    8.74
   1   3  -9   79.55    8.75
  -1  -3   9   74.21    4.74
  -1   3   9   74.11    4.69
   1  -3  -9   62.92    7.41
  -1  -3   9   74.06    7.40
  -1   3   9   82.76    8.00
  -1  -3   8  429.13   19.92
  -1   3   8  479.86   23.75
  -1  -3   8  443.43   23.40
  -1  -3   8  454.59   20.06
  -1   3   8  438.57   20.02
   1  -3  -8  464.57   23.90
   1  -3  -8  492.10   25.08
   1   3  -8  477.21   24.96
  -1  -3   7   42.23    4.85
  -1   3   7   47.08    5.18
   1  -3  -7   43.86    5.57
  -1   3   7   40.89    2.91
   1   3  -7   50.83    5.62
   1   3  -6   13.02    3.21
   1  -3  -6   12.75    3.02
  -1   3   6   10.39    1.40
  -1  -3   6   13.46    2.72
  -1   3   6   16.47    2.90
  -1  -3   5   68.21    5.27
  -1   3   5   66.35    5.25
   1  -3  -5   77.43    6.04
   1   3  -5   74.95    5.89
  -1   3   4  489.05   23.16
  -1  -3   4  493.57   23.14
   1  -3  -4  501.37   23.82
   1   3  -4  514.10   23.76
  -1  -3   3   11.74    1.79
  -1   3   3   13.12    1.82
   1  -3  -3   14.76    2.20
   1   3  -3   17.13    2.24
  -1  -3   3   13.30    1.62
  -1   3   2  278.90   13.19
  -1  -3   2  282.56   13.15
  -1  -3   1 3617.46  153.62
  -1   3   1 3645.17  153.71
   1  -3   0  257.54   11.76
   1   3   0  261.84   11.67
   1  -3   0  244.93   11.63
  -1  -3   0  283.70   12.28
   1   3   1 1865.97   77.46
   1  -3   1 1878.99   77.50
   1  -3   1 1729.87   77.51
   1   3   1 1825.25   77.57
   1   3   2  646.55   28.21
   1  -3   2  659.41   28.24
   1  -3   2  644.78   27.44
   1  -3   3 4514.28  194.41
   1   3   3 4674.34  194.45
   1   3   4   99.05    5.96
   1  -3   4  104.16    6.04
   1  -3   5   17.40    2.49
   1   3   5   13.49    2.41
  -1   3  -6 1294.24   52.93
   1  -3   6 1225.96   52.03
   1   3   6 1189.83   52.01
   1  -3   6 1206.11   52.01
   1   3   6 1228.52   54.33
   1  -3   6 1217.94   54.28
   1  -3   7  547.07   23.65
   1  -3   7  534.67   23.83
   1   3   7  544.60   23.84
   1  -3   7  547.43   26.46
   1   3   7  562.79   26.61
   1   3   8  209.81   10.01
   1  -3   8  213.89   10.03
   1  -3   8  208.89    9.78
   1  -3   8  196.67   12.75
   1   3   8  211.97   12.86
   1   3   9  167.13    8.54
   1   3   9  151.33   11.21
   1  -3   9  154.67   11.20
   1  -3   9  167.16    8.02
   1  -3   9  162.90    8.49
   1  -3  10   48.06    3.99
   1   3  10   49.77    3.86
   1  -3  10   55.15    3.53
   1   3  10   33.73    5.79
   1  -3  10   50.21    6.26
   1  -3  10   45.87    3.71
  -1  -3 -10   48.07    7.42
  -1   3 -10   48.54    7.60
   1  -3  11   44.77    3.80
   1  -3  11   39.62    3.19
   1   3  11   33.76    3.54
  -1   3 -11   33.89    7.21
  -1  -3 -11   32.49    7.63
   1   3  11   37.36    6.38
   1  -3  11   24.88    5.74
  -1  -3 -11   43.30    6.46
   1   3  12   16.54    2.92
   1  -3  12   24.56    3.08
  -1  -3 -12   11.56    6.65
  -1   3 -12   12.09    5.76
   1  -3  12   18.46    2.47
   1   3  12   14.88    2.92
   1  -3  12   20.79    3.06
   1   3  12   16.50    5.24
   1  -3  12   14.38    4.98
   1  -3  13    7.96    2.46
   1   3  13   12.06    2.67
   1  -3  13    6.76    1.96
   1   3  13    4.48    2.43
   1   3  14   15.26    2.48
   1  -3  14   14.55    2.38
   1  -3  14   15.64    2.07
   1  -3  15   32.02    2.78
   1   3  15   30.76    2.77
  -1   4  15   68.92    4.09
  -1  -4  15   76.09    4.14
  -1   4  15   61.22    4.22
  -1  -4  14    1.00    2.00
  -1   4  14    0.39    2.14
  -1  -4  13   10.12    1.82
  -1  -4  12   70.04    4.68
   1  -4 -12   48.62    7.32
  -1  -4  12   67.58    6.14
  -1  -4  12   62.36    7.44
  -1   4  12   49.17    7.10
  -1  -4  12   66.34    4.63
  -1  -4  12   63.48    3.95
  -1   4  12   61.90    4.52
  -1  -4  11  181.54   13.50
  -1   4  11  180.09   13.69
   1   4 -11  177.97   14.96
   1  -4 -11  196.70   15.78
  -1  -4  11  194.60   10.01
  -1  -4  11  205.07   10.01
  -1   4  11  202.61   10.03
  -1  -4  11  202.68    9.42
   1  -4 -11  181.54    9.90
  -1  -4  11  205.02   12.02
   1  -4 -11  194.14   14.31
   1  -4 -10   44.73    6.86
  -1  -4  10   60.09    4.19
  -1  -4  10   58.39    3.57
  -1   4  10   56.49    4.12
  -1  -4  10   48.78    4.04
   1  -4 -10   58.81    4.15
   1  -4 -10   49.06    8.02
   1   4 -10   55.26    8.21
  -1  -4  10   60.64    5.78
  -1   4  10   60.28    6.96
  -1  -4  10   54.24    6.75
  -1  -4   9 1036.31   45.28
  -1  -4   9 1123.70   45.41
   1  -4  -9 1039.53   45.51
  -1   4   9 1021.01   49.01
  -1  -4   9 1040.21   49.01
   1  -4  -9 1055.57   50.17
  -1  -4   9 1008.90   45.18
   1   4  -9 1060.43   50.86
   1  -4  -9 1014.63   50.70
  -1  -4   9 1082.26   44.75
  -1   4   9 1012.80   45.14
  -1  -4   9 1012.24   45.11
  -1  -4   9  985.39   47.00
  -1   4   8   23.29    2.30
  -1   4   8   21.10    4.44
  -1  -4   8   19.60    4.22
  -1  -4   8   17.09    2.11
  -1   4   8   18.85    2.12
  -1  -4   8   19.51    2.10
   1  -4  -8   15.34    4.33
  -1  -4   8   19.42    3.28
   1   4  -8   19.55    4.65
   1   4  -7   70.67    6.55
   1  -4  -7   73.09    6.75
  -1   4   7   59.34    3.79
  -1  -4   7   58.64    3.72
  -1  -4   7   64.95    5.97
  -1   4   7   58.24    5.72
  -1  -4   7   53.87    4.70
   1  -4  -6  135.17    9.64
   1   4  -6  151.19    9.87
  -1  -4   6  150.56    8.25
  -1  -4   6  151.17    9.16
  -1   4   6  145.36    9.22
  -1   4   6  144.13    7.17
  -1  -4   5   44.16    3.63
   1   4  -5   52.19    4.74
   1  -4  -5   51.68    4.91
  -1  -4   5   51.89    4.44
  -1   4   5   55.54    4.53
   1  -4  -4   65.21    5.07
   1   4  -4   60.07    4.87
  -1  -4   4   72.64    4.32
  -1  -4   4   60.60    4.48
  -1   4   4   62.14    4.53
   1  -4  -3 2860.01  121.96
   1   4  -3 2831.74  121.82
  -1  -4   3 2845.20  121.35
  -1   4   3 2840.29  121.37
  -1  -4   3 2858.19  121.01
  -1  -4   2 2069.51   89.15
  -1   4   2 2111.89   89.20
  -1  -4   2 2092.75   89.00
  -1   4   1 3984.78  169.67
  -1  -4   1 4041.01  169.60
   1   4   0 7065.49  301.09
   1  -4   0 6881.69  301.06
   1   4   1 2886.64  121.33
   1  -4   1 2853.67  121.35
   1   4   2  135.21    6.70
   1  -4   2  140.44    6.77
   1  -4   3 3904.81  163.92
   1  -4   3 3886.32  164.79
   1   4   3 3850.52  164.79
   1  -4   4  822.92   35.89
   1  -4   4  853.02   37.01
   1   4   4  849.24   36.99
   1   4   5   61.63    4.61
   1  -4   5   61.06    4.66
   1  -4   6   70.25    3.88
   1   4   6   76.90    3.94
   1  -4   6   76.13    3.97
   1   4   6   68.68    5.48
   1  -4   6   74.30    5.71
   1  -4   6   74.78    4.00
   1   4   7  173.83    8.24
   1  -4   7  166.83    8.22
   1  -4   7  178.76    8.07
   1  -4   7  171.42    8.28
   1  -4   7  173.62    8.26
   1   4   7  170.23   10.46
   1  -4   7  166.06   10.44
   1  -4   8    6.62    1.85
   1   4   8    6.62    1.82
   1  -4   8    5.71    1.69
   1   4   8    2.18    3.20
   1  -4   8    7.83    3.02
   1  -4   8    9.09    1.58
   1  -4   9  738.33   31.52
   1   4   9  749.80   32.18
   1  -4   9  667.31   32.60
   1  -4   9  732.52   35.33
   1   4   9  700.95   35.17
   1  -4   9  727.98   32.06
   1  -4  10   13.54    4.35
   1   4  10    6.82    4.17
   1  -4  10   18.68    2.76
  -1  -4 -10   11.84    5.12
  -1   4 -10   11.21    4.80
   1  -4  10   16.44    2.20
   1  -4  11   11.57    2.11
   1   4  11   10.25    2.68
   1  -4  11   12.29    2.60
   1  -4  11    8.48    4.65
   1   4  11   10.42    4.40
   1   4  11   10.47    2.63
   1  -4  11   12.59    2.57
  -1  -4 -11   12.31    6.21
  -1   4 -11   10.71    5.33
   1  -4  12    0.12    1.85
   1   4  12    0.17    2.55
   1  -4  12    1.26    2.34
  -1  -4 -12    0.76    3.92
   1   4  12    1.24    3.98
   1  -4  12   -4.29    3.85
   1   4  12    0.60    2.27
   1  -4  12   -0.15    2.09
  -1   4 -12   -1.89    4.83
  -1  -4 -12    2.00    4.88
   1  -4  13  235.59   11.01
   1   4  13  210.67   11.49
   1  -4  13  242.58   11.40
   1   4  13  243.59   11.41
   1  -4  14    8.63    2.21
   1   4  14    2.70    1.96
   1   4  14    3.51    2.19
   1   4  15   46.38    3.16
   1  -4  15   52.33    3.22
  -1   5  15    5.84    1.55
  -1  -5  15    5.78    1.49
   1   5 -15    4.54    1.88
   1  -5 -15    5.54    2.15
  -1   5  14   51.56    3.58
  -1  -5  14   50.12    3.48
  -1   5  13    2.48    2.51
  -1  -5  12    8.78    2.52
  -1  -5  12    5.56    2.15
  -1   5  12    5.79    2.27
  -1  -5  12    6.31    1.66
  -1  -5  12    5.32    4.13
  -1   5  12    5.56    4.62
   1  -5 -12    3.24    3.90
  -1  -5  11  173.09   11.45
   1  -5 -11  200.02   14.93
   1  -5 -11  194.49   10.26
  -1  -5  11  203.81   13.52
  -1   5  11  178.01   13.23
  -1  -5  11  194.32   10.18
  -1  -5  11  204.39    9.37
  -1   5  11  197.78    9.91
  -1  -5  11  201.92    9.88
  -1  -5  10  487.70   22.39
  -1   5  10  499.86   22.09
  -1  -5  10  499.22   22.09
  -1  -5  10  511.02   21.63
   1   5 -10  481.59   27.74
   1  -5 -10  427.07   27.30
   1  -5 -10  497.61   27.74
  -1   5  10  488.66   25.92
  -1  -5  10  476.58   25.66
  -1  -5  10  488.50   24.08
  -1  -5  10  469.79   22.28
   1  -5 -10  474.22   22.60
   1  -5  -9   18.11    2.68
  -1   5   9   23.48    4.53
  -1  -5   9   19.79    4.43
  -1  -5   9   24.74    2.74
  -1  -5   9   21.18    2.67
  -1  -5   9   20.71    2.31
  -1   5   9   18.25    2.29
  -1  -5   9   23.53    2.04
   1  -5  -9   14.98    4.83
  -1  -5   9   20.21    3.70
   1   5  -9   28.13    5.54
   1  -5  -9   26.44    5.76
   1   5  -8  197.10   13.42
   1  -5  -8  195.11   13.35
  -1   5   8  192.22    9.44
  -1  -5   8  210.22    9.10
  -1  -5   8  196.43    9.43
  -1   5   8  181.13    9.68
  -1  -5   8  181.52   10.88
  -1  -5   8  203.53    9.69
  -1   5   8  216.95   12.57
  -1  -5   8  190.48   12.14
  -1  -5   8  194.35    9.70
  -1  -5   7   25.06    3.14
   1   5  -7   30.72    4.69
   1  -5  -7   31.10    4.79
  -1   5   7   25.37    2.14
  -1  -5   7   27.31    2.23
  -1  -5   7   27.22    1.85
  -1  -5   7   23.33    2.40
  -1   5   7   33.41    4.30
  -1  -5   7   24.19    3.78
  -1   5   7   26.40    2.44
  -1  -5   6   31.21    3.13
   1  -5  -6   25.41    4.00
   1   5  -6   31.81    4.28
  -1  -5   6   27.00    3.55
  -1   5   6   32.33    3.73
  -1  -5   6   29.24    2.38
  -1   5   6   27.95    2.31
   1   5  -5 1232.47   54.85
   1  -5  -5 1180.22   54.84
  -1  -5   5 1205.48   53.32
  -1   5   5 1215.25   54.06
  -1  -5   5 1276.83   54.08
  -1  -5   4  484.79   22.57
  -1  -5   4  521.58   22.31
  -1   5   4  469.77   22.49
   1  -5  -4  481.28   23.34
   1   5  -4  477.80   23.17
  -1  -5   3  914.72   38.36
  -1   5   3  863.30   38.46
  -1  -5   3  850.98   38.42
  -1  -5   2   26.60    2.31
  -1   5   2   27.28    2.18
  -1  -5   2   31.48    2.23
  -1   5   1   26.08    1.91
  -1  -5   1   30.32    1.96
   1   5   0  628.21   25.98
   1  -5   0  564.01   25.90
   1  -5   0  607.52   27.58
   1  -5   1  152.37    7.37
  -1  -5  -1  152.46    8.48
   1   5   1  170.61    7.45
   1   5   2 2225.78   96.94
   1  -5   2 2349.32   97.00
   1   5   3   41.23    2.93
   1  -5   3   42.42    2.93
   1   5   4 2453.65  104.92
   1  -5   4 2432.67  104.87
   1  -5   4 2463.69  103.88
   1   5   5  270.93   13.73
   1  -5   5  289.24   13.75
   1  -5   5  268.45   12.47
   1  -5   6  474.47   22.13
   1   5   6  489.38   23.74
   1  -5   6  497.66   23.70
   1  -5   6  510.55   21.56
   1  -5   6  494.61   21.85
   1  -5   6  502.18   21.76
   1  -5   7  162.18    8.71
   1  -5   7  178.19    8.08
   1   5   7  177.29   10.52
   1  -5   7  181.53   10.63
   1  -5   7  175.67    8.31
   1  -5   7  167.94    8.38
  -1  -5  -8  142.54    7.88
   1   5   8  138.95    9.84
   1  -5   8  139.55   10.01
   1   5   8  152.71    7.93
   1  -5   8  163.25    7.35
   1  -5   8  143.81    8.07
   1  -5   8  153.94    7.73
  -1  -5  -8  154.51    7.66
  -1   5  -9    8.04    4.01
  -1  -5  -9   11.34    4.96
   1  -5   9   12.69    2.32
   1  -5   9    9.65    1.79
   1  -5   9    8.07    2.04
   1  -5   9   16.42    4.18
   1   5   9    6.30    3.70
   1   5   9   15.07    2.40
   1  -5  10  214.74    9.84
  -1   5 -10  212.07   14.97
  -1  -5 -10  227.06   15.65
   1   5  10  197.73   13.27
   1  -5  10  177.20   12.88
   1  -5  10  195.66   10.40
   1   5  11  141.36    7.24
   1  -5  11  138.67    7.20
   1  -5  11  138.28    6.92
   1   5  11  113.47    7.28
  -1   5 -11  127.86   11.92
  -1  -5 -11  123.86   12.07
   1   5  11  132.47   10.45
   1  -5  11  136.01   10.46
   1  -5  11  135.00    7.65
  -1  -5 -11  136.37    7.82
   1   5  12  258.38   12.03
   1  -5  12  244.64   11.94
   1  -5  12  265.50   11.73
   1   5  12  236.76   12.24
   1  -5  12  258.69   12.46
  -1  -5 -12  246.52   12.39
  -1   5 -12  211.46   16.94
  -1  -5 -12  240.46   18.02
   1   5  12  236.76   15.39
   1  -5  12  231.34   15.38
  -1  -5 -12  227.52   16.95
   1   5  13   49.14    4.15
   1  -5  13   62.83    3.72
   1   5  13   57.59    4.04
   1  -5  13   56.00    3.93
   1   5  14  109.36    6.45
   1  -5  14  120.51    6.25
   1   5  14  127.06    6.35
   1  -5  15    0.58    1.41
   1   5  15    1.30    1.42
   1   5  15   -0.21    1.52
   1   6 -15   34.62    2.80
  -1   6  15   41.17    2.48
  -1   6  15   34.02    2.80
  -1   6  14   33.33    2.65
  -1  -6  14   31.36    2.53
  -1   6  14   29.00    3.10
  -1  -6  13   85.66    4.88
  -1   6  13   79.31    5.39
   1  -6 -12    0.76    4.15
  -1  -6  12    6.21    2.52
  -1   6  12   -0.56    3.75
  -1  -6  12   -0.53    3.68
   1  -6 -12    4.25    4.15
   1  -6 -12    1.79    2.14
  -1  -6  11  183.51    9.61
  -1   6  11  185.75    9.14
  -1  -6  11  188.52    9.14
  -1   6  11  153.48   12.04
  -1  -6  11  177.53   12.28
   1  -6 -11  172.05    9.66
   1  -6 -11  177.16   14.27
  -1  -6  10   99.96    6.10
   1  -6 -10   91.49    9.96
  -1  -6  10   97.69    6.22
  -1  -6  10   93.44    5.63
  -1   6  10  105.09    5.71
  -1   6  10   97.66    8.55
  -1  -6  10  102.95    8.54
  -1  -6  10   95.47    7.27
   1  -6 -10  103.61    6.42
   1  -6  -9  170.59    8.83
  -1  -6   9  159.89   10.74
  -1   6   9  152.95   10.91
   1   6  -9  147.17   12.02
   1  -6  -9  168.55   12.53
  -1  -6   9  152.96    8.39
  -1   6   9  152.97    7.90
  -1  -6   9  162.90    7.97
   1  -6  -9  149.09   12.44
  -1  -6   9  153.81    8.29
  -1  -6   9  155.49    9.53
  -1  -6   8   67.12    6.20
  -1   6   8   78.89    6.62
  -1  -6   8   57.10    5.13
  -1   6   8   65.61    4.41
  -1  -6   8   69.32    4.06
  -1   6   8   69.42    4.02
   1  -6  -8   74.39    7.42
   1   6  -8   65.79    7.19
   1  -6  -8   78.95    4.94
  -1  -6   8   59.56    4.33
  -1  -6   7 1187.93   51.24
  -1  -6   7 1218.21   52.53
  -1   6   7 1163.31   51.21
  -1   6   7 1181.45   50.83
  -1  -6   7 1214.24   50.86
   1   6  -7 1148.80   54.75
   1  -6  -7 1144.55   54.77
  -1  -6   7 1219.02   53.59
  -1   6   7 1157.17   53.57
  -1  -6   6  180.65    8.48
  -1  -6   6  159.56    9.13
  -1   6   6  169.48    8.25
  -1  -6   6  164.34    7.84
  -1  -6   6  167.59    9.85
  -1   6   6  176.52   10.06
   1  -6  -6  151.59   10.47
   1   6  -6  174.67   10.81
   1  -6  -5   18.66    3.21
   1   6  -5   12.10    2.66
  -1  -6   5   15.32    2.33
  -1  -6   5   21.60    1.98
  -1   6   5   18.28    1.77
  -1   6   5   20.87    2.79
  -1  -6   5   17.07    2.76
  -1   6   4  110.72    6.69
  -1  -6   4  124.11    6.78
  -1  -6   4  115.64    6.60
  -1  -6   3  643.91   29.13
  -1  -6   3  677.84   29.41
  -1   6   2   25.69    1.97
  -1  -6   2   24.08    1.93
  -1   6   1   87.83    4.13
  -1  -6   1   89.49    4.05
   1  -6  -1   81.32    5.77
   1   6  -1   77.28    4.00
   1  -6  -1   74.43    3.98
  -1  -6   0    4.18    0.56
   1  -6   0    4.50    1.72
  -1   6   0    3.77    0.66
  -1  -6   0    1.80    1.50
  -1  -6  -1   37.80    3.72
   1  -6   1   48.90    2.77
   1   6   2    3.70    0.88
  -1  -6  -2    4.67    1.69
   1  -6   2    2.76    0.87
   1  -6   3  181.28    8.70
   1   6   3  173.94    8.64
   1   6   4   -0.17    1.27
   1  -6   4    0.50    1.18
   1   6   5  150.41    8.17
   1  -6   5  143.53    8.02
  -1  -6  -5  143.94    7.02
   1  -6   5  141.81    6.99
   1  -6   6  323.15   15.21
  -1  -6  -6  349.02   15.34
   1  -6   6  325.29   15.36
   1  -6   6  354.08   14.90
   1   6   6  342.97   16.93
   1  -6   6  354.70   16.97
   1  -6   6  328.37   15.07
   1   6   7   13.03    3.10
   1  -6   7   14.42    3.21
   1  -6   7   14.46    1.90
  -1  -6  -7   13.92    1.84
   1  -6   7   12.45    1.77
   1  -6   7   14.10    1.72
   1  -6   7   12.78    1.53
   1   6   8  178.16   11.22
   1  -6   8  196.81   11.48
   1  -6   8  176.95    9.12
   1  -6   8  196.59    8.70
  -1  -6  -8  183.11    9.15
  -1  -6  -8  178.06    9.42
   1  -6   8  179.32    9.24
  -1  -6  -8  195.63   12.77
  -1   6  -8  183.01   12.39
   1   6   8  182.46    9.32
   1   6   9   48.56    3.97
   1  -6   9   53.50    3.58
  -1  -6  -9   56.20    3.78
   1  -6   9   54.17    3.39
   1   6   9   47.85    5.77
   1  -6   9   51.06    6.08
  -1  -6  -9   56.25    7.13
  -1   6  -9   42.85    6.34
   1  -6   9   49.49    3.83
   1   6  10  376.34   20.74
   1  -6  10  360.75   20.66
   1  -6  10  378.23   17.48
   1   6  10  387.03   17.48
   1  -6  10  383.89   17.87
   1  -6  10  410.02   17.37
   1  -6  10  388.31   18.02
  -1  -6 -10  355.59   22.63
  -1   6 -10  357.63   22.36
   1   6  10  378.35   18.10
   1   6  11   15.05    4.41
   1  -6  11   14.36    4.52
   1  -6  11   15.69    2.52
   1   6  11   16.99    2.52
   1  -6  11   19.20    2.87
   1  -6  11   19.99    2.33
   1   6  11   14.23    2.86
  -1  -6 -11   13.06    2.83
   1  -6  11   16.26    2.86
  -1  -6 -11    9.44    4.78
  -1   6 -11   17.40    5.12
   1  -6  12   53.36    4.26
   1   6  12   44.11    3.93
  -1  -6 -12   26.41    6.60
  -1   6 -12   34.56    6.34
   1   6  12   48.60    3.68
   1  -6  12   51.48    3.69
  -1  -6 -12   56.09    8.16
   1  -6  12   50.19    6.13
   1   6  12   54.55    6.56
  -1  -6 -12   51.29    4.15
   1   6  13  122.95    7.16
   1  -6  13  130.13    6.78
   1   6  13  137.32    6.86
   1   6  14    1.13    1.87
   1  -6  14    1.95    1.58
   1   6  14    3.52    1.70
   1   6  15    4.53    1.59
   1   6  15    2.36    1.38
  -1   7  15    1.72    1.42
   1   7 -15    0.16    1.01
   1   7 -14   29.07    2.77
  -1   7  14   34.43    2.42
  -1   7  14   30.55    2.92
  -1  -7  13    5.84    2.30
  -1   7  13    3.06    1.78
  -1  -7  13    4.38    1.70
  -1   7  13    5.65    2.44
   1  -7 -12   34.58    6.72
   1  -7 -12   41.11    3.78
  -1  -7  12   38.36    3.80
   1  -7 -12   37.70    3.28
   1  -7 -11  143.51   12.94
   1  -7 -11  135.63   11.92
   1  -7 -11  147.61    8.48
  -1   7  11  148.82   10.68
  -1  -7  11  143.54   10.48
  -1  -7  11  145.25    8.30
  -1  -7  11  145.56    8.11
  -1  -7  10   57.53    4.54
  -1   7  10   63.55    4.05
  -1  -7  10   64.77    4.08
   1  -7 -10   60.35    8.65
   1  -7 -10   58.34    7.56
  -1  -7  10   57.13    6.26
  -1   7  10   58.42    6.64
   1  -7 -10   65.43    5.09
  -1  -7  10   66.89    5.66
  -1  -7  10   64.66    4.93
  -1  -7   9   53.15    5.74
  -1   7   9   44.68    5.51
  -1   7   9   47.13    3.35
  -1  -7   9   50.46    3.34
   1  -7  -9   53.04    7.59
  -1  -7   9   39.19    3.70
   1  -7  -9   51.55    4.23
  -1  -7   9   49.26    4.88
  -1  -7   8   90.98    6.35
  -1   7   8   85.17    5.34
  -1   7   8   84.77    4.79
  -1  -7   8   90.67    4.83
  -1   7   8   86.67    7.03
  -1  -7   8   88.67    7.13
  -1  -7   8   83.41    5.28
   1  -7  -8   98.76    5.95
  -1  -7   7   66.87    4.94
  -1  -7   7   64.10    3.79
  -1   7   7   57.11    3.37
  -1  -7   7   50.13    3.26
  -1   7   7   57.98    3.84
  -1   7   7   45.41    5.04
  -1  -7   7   65.61    5.48
   1  -7  -7   58.26    4.26
  -1  -7   7   55.53    3.81
  -1   7   6  127.62    6.26
  -1  -7   6  127.43    6.26
  -1  -7   6  140.40    7.81
  -1  -7   6  137.12    7.01
  -1   7   6  130.48    6.74
  -1  -7   6  141.69    8.25
  -1   7   6  128.54    8.14
  -1  -7   5  569.98   25.01
  -1  -7   5  549.72   24.16
  -1   7   5  531.58   23.80
  -1  -7   5  539.26   25.05
  -1   7   5  529.40   25.15
  -1   7   4  165.66    8.87
  -1  -7   4  167.05    8.76
  -1  -7   4  180.30    8.55
  -1  -7   4  163.24    8.28
  -1   7   3  787.32   34.56
  -1  -7   3  790.12   34.39
  -1   7   2  434.73   18.71
  -1  -7   2  423.76   18.48
   1  -7  -2  380.59   20.63
  -1   7   1 2026.63   86.57
   1  -7  -1 2280.66   89.47
  -1  -7   0 1008.19   44.84
  -1  -7  -1  761.76   34.40
   1  -7   1  747.38   32.62
  -1  -7  -2  307.94   16.02
   1  -7   2  325.05   13.92
   1   7   2  302.05   13.80
  -1  -7  -3  192.90   10.85
   1   7   3  182.76    8.81
   1  -7   3  181.96    8.87
   1  -7   4 1002.96   42.21
   1   7   4  975.72   42.19
  -1  -7  -4  938.67   41.55
   1   7   5   76.66    4.98
   1  -7   5   70.44    4.82
  -1  -7  -5   71.00    4.09
   1  -7   6   78.05    3.86
  -1  -7  -6   74.60    4.38
   1  -7   6   72.31    4.04
   1   7   6   75.72    5.49
   1  -7   6   74.47    5.33
   1  -7   7  240.99   11.35
  -1  -7  -7  238.73   11.91
   1   7   7  246.65   13.36
   1  -7   7  232.05   13.15
   1  -7   7  237.68   11.09
   1  -7   7  249.68   11.63
   1  -7   7  261.35   11.12
   1  -7   7  235.96   11.54
  -1   7  -7  236.32   14.26
  -1  -7  -7  245.51   14.43
  -1  -7  -7  252.10   11.69
   1   7   8   76.97    6.53
   1  -7   8   79.35    6.50
   1   7   8   80.33    4.46
   1  -7   8   80.57    4.47
   1  -7   8   85.01    4.98
   1  -7   8   84.74    4.37
   1  -7   8   76.89    4.89
  -1  -7  -8   86.74    5.05
  -1   7  -8   75.81    7.34
  -1  -7  -8   78.11    7.65
   1   7   8   78.77    5.04
   1  -7   9   56.39    6.08
   1   7   9   54.45    6.05
   1  -7   9   66.55    3.97
   1   7   9   61.47    3.94
   1  -7   9   68.48    4.50
   1  -7   9   67.54    4.46
  -1  -7  -9   58.39    7.04
  -1   7  -9   54.46    6.91
   1   7   9   58.80    4.41
   1  -7   9   67.34    3.83
  -1  -7  -9   68.41    4.45
   1   7  10  180.86    8.56
   1  -7  10  177.28    8.53
  -1   7 -10  151.53   12.46
  -1  -7 -10  164.62   13.04
   1  -7  10  163.03    8.97
  -1  -7 -10  179.07    9.00
   1   7  10  162.41   11.37
   1  -7  10  185.91   11.72
   1   7  10  158.59    9.06
   1  -7  11   31.65    2.93
   1   7  11   31.56    2.94
   1  -7  11   28.38    3.23
  -1  -7 -11   25.13    5.78
  -1   7 -11   23.86    5.71
  -1  -7 -11   38.44    3.93
   1   7  11   24.27    4.62
   1  -7  11   32.43    5.23
   1   7  11   26.88    3.25
  -1  -7 -12   58.53    4.76
   1  -7  12   61.62    3.95
   1   7  12   61.33    3.92
   1   7  12   54.68    4.33
  -1  -7 -13   14.35    2.48
   1   7  13   10.70    2.02
   1  -7  13   16.28    2.13
   1   7  13   10.08    2.51
   1   7  14   37.57    2.90
   1   7  14   31.45    2.49
   1   7  15   33.56    2.24
   1   7  15   33.84    2.25
  -1   8  14    3.68    1.79
  -1   8  13   19.45    2.71
  -1   8  13   18.14    1.94
  -1  -8  13   14.32    2.69
   1   8 -13   18.80    2.41
  -1  -8  12    2.89    2.56
   1  -8 -12    2.51    1.90
   1  -8 -12    3.00    2.37
  -1  -8  12    1.27    1.65
  -1   8  12    1.72    1.72
   1  -8 -11  154.69    9.15
   1  -8 -11  158.25   13.80
   1  -8 -11  168.91    8.71
   1  -8 -11  159.68   13.53
  -1   8  10   48.43    5.69
  -1  -8  10   33.35    4.96
  -1  -8  10   34.27    3.36
   1  -8 -10   27.58    6.27
   1  -8 -10   42.31    7.21
   1  -8 -10   28.27    3.61
   1  -8  -9  117.05    7.11
   1  -8  -9  108.78   10.45
  -1   8   9  114.83    5.85
  -1  -8   9  113.63    5.85
  -1   8   9  110.52    8.38
  -1  -8   9   96.75    8.00
  -1  -8   9  107.58    6.39
   1  -8  -9  108.23   10.80
  -1  -8   9  105.43    7.49
  -1   8   8  449.36   22.35
  -1  -8   8  458.18   22.30
  -1   8   8  432.10   19.63
  -1  -8   8  443.11   19.65
  -1   8   8  437.91   20.26
   1  -8  -8  435.04   25.00
   1  -8  -8  474.46   21.05
  -1  -8   8  449.22   21.53
  -1  -8   8  439.30   20.24
  -1   8   7   47.16    4.91
  -1  -8   7   52.43    4.94
   1  -8  -7   52.61    7.08
  -1  -8   7   53.62    3.16
  -1   8   7   56.08    3.75
  -1  -8   7   50.89    4.60
  -1  -8   7   53.52    3.70
   1  -8  -7   54.54    4.24
  -1   8   6    4.67    1.50
  -1  -8   6    6.52    1.78
  -1   8   6    4.85    2.22
  -1  -8   6    2.70    2.00
  -1   8   5  501.78   22.40
  -1  -8   5  460.04   22.03
  -1   8   5  480.76   21.17
  -1  -8   5  472.07   21.58
  -1   8   4  340.16   15.83
  -1  -8   4  328.02   15.59
  -1  -8   4  320.28   15.67
  -1   8   4  354.67   15.09
  -1  -8   4  329.30   15.49
  -1  -8   3   32.27    2.19
  -1   8   3   32.14    2.36
  -1  -8   3   25.05    2.39
   1  -8  -2    3.83    2.43
   1  -8  -1  253.09   13.64
  -1  -8   0  156.53    9.05
   1  -8   1   20.90    1.89
  -1  -8  -1   23.15    3.05
  -1  -8  -2   30.62    2.12
   1  -8   2   21.22    1.91
  -1  -8  -2   31.78    3.66
  -1  -8  -3 3118.51  136.16
  -1  -8  -3 3110.99  133.10
   1  -8   3 3335.19  133.14
  -1  -8  -3 2946.83  133.45
   1   8   4  578.23   25.21
   1  -8   4  566.77   25.19
  -1  -8  -4  547.86   24.86
  -1  -8  -4  589.51   28.20
   1  -8   5  143.32    7.71
   1   8   5  152.32    7.86
  -1  -8  -5  131.61    7.06
  -1  -8  -5  138.37    8.48
  -1  -8  -6    9.73    1.74
   1  -8   6    6.58    1.31
  -1  -8  -6    9.51    1.89
  -1   8  -6    8.29    2.62
  -1  -8  -6    8.97    2.71
   1   8   6    4.07    2.02
   1  -8   6    7.07    2.06
   1   8   7   15.24    2.99
   1  -8   7   20.64    3.09
   1  -8   7   15.01    1.59
  -1  -8  -7   17.50    2.25
   1  -8   7   11.00    1.98
   1  -8   7   15.02    1.79
  -1  -8  -7   12.80    2.31
   1  -8   7   14.85    2.12
  -1  -8  -7   12.84    3.33
  -1   8  -7   12.86    3.33
   1   8   7   11.38    2.18
   1   8   8   -0.49    1.85
   1  -8   8    2.69    1.78
   1  -8   8   -0.30    1.86
  -1  -8  -8    0.48    1.84
   1   8   8    2.51    1.42
   1  -8   8   -0.52    1.34
  -1   8  -8   -0.54    2.83
  -1  -8  -8   -1.65    2.86
   1   8   8    2.19    2.55
   1  -8   8    2.13    2.61
   1   8   9  255.85   14.66
   1  -8   9  264.63   14.78
   1   8   9  268.44   12.09
   1  -8   9  276.70   12.11
   1  -8   9  257.94   12.68
  -1  -8  -9  274.04   12.79
   1  -8   9  250.78   12.64
   1   8   9  246.80   12.78
  -1  -8  -9  230.18   15.96
  -1   8  -9  246.89   16.16
   1   8  10   43.32    3.10
   1  -8  10   41.52    3.02
   1   8  10   38.24    3.80
   1  -8  10   36.93    4.97
  -1  -8 -10   35.03    6.03
   1  -8  10   35.86    3.58
  -1  -8 -10   39.36    3.51
   1   8  10   36.94    3.47
   1  -8  10   41.50    3.63
   1  -8  11   35.47    2.79
   1   8  11   30.05    2.78
  -1  -8 -11   28.91    3.75
   1  -8  11   26.10    3.30
   1   8  11   35.29    3.42
  -1  -8 -11   23.17    5.66
   1   8  12   34.97    2.85
   1  -8  12   39.07    2.93
  -1  -8 -12   42.74    4.03
   1   8  12   38.81    3.46
   1   8  13   42.24    2.92
  -1  -8 -13   38.90    3.56
   1   8  13   47.08    3.41
   1   8  14    4.68    1.58
  -1   9  14    4.38    1.60
  -1   9  13    7.02    2.13
   1  -9 -12   30.05    3.05
   1  -9 -12   42.87    3.96
   1  -9 -11    6.53    2.29
   1  -9 -11    1.81    4.71
   1  -9 -11    3.12    2.58
   1  -9 -11    5.08    4.80
   1  -9 -10  764.90   32.71
   1  -9 -10  673.23   38.04
   1  -9 -10  684.34   38.55
   1  -9 -10  726.22   33.25
  -1  -9  10  725.89   32.43
   1  -9  -9    3.32    4.99
   1  -9  -9    3.49    4.54
  -1  -9   9   -0.17    2.01
   1  -9  -9    2.23    2.65
  -1  -9   8   53.38    3.93
   1  -9  -8   55.58    4.58
   1  -9  -8   50.99    7.53
  -1  -9   7    0.29    2.09
  -1   9   7    0.14    1.68
  -1  -9   7    2.03    1.71
   1  -9  -7    0.22    1.90
   1  -9  -7    2.20    4.45
  -1  -9   6   84.12    5.76
  -1   9   6   91.56    5.03
  -1  -9   6   85.40    5.43
  -1  -9   5    0.83    1.56
  -1   9   5   -0.11    1.33
  -1   9   4 3090.96  122.79
  -1  -9   4 2954.09  123.34
  -1   9   3   48.10    2.74
   1  -9  -3   55.54    5.46
   1  -9  -2  205.19    9.15
  -1  -9   2  176.14    9.34
  -1  -9   2  191.60    9.48
   1  -9  -2  186.94   11.33
   1  -9  -1   73.73    4.08
  -1  -9   1   69.17    4.29
  -1  -9   0  382.93   17.57
   1  -9   0  394.16   17.35
   1  -9   1  141.91    7.01
  -1  -9  -1  137.71    8.76
   1  -9   1  142.31    7.15
  -1  -9  -2  890.40   37.19
  -1  -9  -2  884.55   39.85
   1  -9   2  815.60   37.08
  -1  -9  -3  306.33   13.91
  -1  -9  -3  284.18   16.69
  -1  -9  -4  898.36   39.39
  -1  -9  -4  946.62   43.47
   1  -9   5    0.69    1.40
  -1  -9  -5   -2.93    3.53
  -1  -9  -5    0.94    1.51
  -1  -9  -5    0.28    1.55
  -1  -9  -6  289.46   14.33
   1  -9   6  318.50   14.93
  -1  -9  -6  314.90   18.54
  -1  -9  -6  303.63   14.24
  -1  -9  -6  269.60   15.68
   1  -9   6  312.77   13.91
   1  -9   7  144.25    8.47
  -1  -9  -7  153.06    7.62
   1  -9   7  136.44    7.28
  -1  -9  -7  117.72    9.10
   1  -9   7  143.13    6.95
  -1  -9  -7  133.81    7.67
   1  -9   7  140.17    7.27
   1   9   7  138.47    7.36
  -1  -9  -7  142.86   11.64
  -1  -9  -8  158.92   12.00
   1  -9   8  207.18    9.76
   1  -9   8  187.65    9.75
  -1  -9  -8  195.55    9.97
   1  -9   8  193.82   11.16
  -1  -9  -8  184.60   14.09
   1   9   8  204.15    9.96
   1  -9   9   53.91    3.34
  -1  -9  -9   47.81    7.56
   1   9   9   50.24    4.06
   1  -9   9   58.33    4.14
  -1  -9  -9   57.95    4.18
   1  -9   9   47.35    3.93
  -1  -9 -10   41.82    7.55
   1  -9  10   44.52    3.93
  -1  -9 -10   51.31    4.03
   1  -9  10   55.39    4.20
   1   9  10   53.74    3.87
   1  -9  10   57.88    3.46
  -1  -9 -11    6.22    4.99
   1   9  11   12.17    2.57
  -1  -9 -11   12.96    3.17
   1  -9  11   11.12    1.92
   1  -9  11   12.01    2.48
  -1  -9 -12   23.77    3.25
   1   9  12   19.92    2.61
  -1  -9 -13   -0.52    1.92
   1   9  13    2.52    1.75
   1   9  14  139.38    6.70
  -1  10  14   49.45    2.98
  -1  10  13    9.17    1.94
  -1 -10  12    2.16    2.24
   1 -10 -12    1.45    1.75
   1 -10 -12    1.83    2.43
   1 -10 -11   51.48    4.02
   1 -10 -11   48.86    4.51
  -1 -10  11   44.02    4.12
   1 -10 -10   -0.75    2.65
  -1 -10  10    2.32    2.02
   1 -10 -10   -3.41    4.89
   1 -10 -10   -2.69    5.02
  -1 -10  10   -0.20    2.47
   1 -10 -10    2.48    2.43
  -1 -10   9  115.00    6.41
   1 -10  -9  116.17    6.91
   1 -10  -9  110.73    7.25
   1 -10  -9   98.54   10.75
   1 -10  -8  109.79   11.03
  -1 -10   8  120.07    6.65
   1 -10  -8  139.76   11.54
   1 -10  -8  113.70    7.43
   1 -10  -8  123.59    7.13
  -1 -10   7   35.06    3.07
  -1  10   7   41.60    3.21
   1 -10  -7   35.99    3.71
  -1  10   6    8.60    1.83
  -1 -10   6    5.73    2.03
  -1 -10   5 1144.47   50.24
   1 -10  -5 1172.10   50.45
  -1  10   5 1149.99   49.59
  -1 -10   4   30.33    2.75
  -1  10   4   26.28    2.16
   1 -10  -3  271.68   12.39
  -1  10   3  269.15   11.91
  -1 -10   3  249.56   12.74
   1 -10  -3  233.10   14.89
  -1 -10   2   98.17    5.67
   1 -10  -2  101.05    7.50
   1 -10  -2  100.14    5.33
  -1 -10   2   92.25    5.62
  -1 -10   1  334.63   15.28
  -1 -10   1  313.89   14.65
   1 -10  -1  343.04   14.95
  -1 -10   0  719.71   31.22
   1 -10   0  735.98   30.99
   1 -10   0  701.69   32.07
   1 -10   0  713.56   30.87
  -1 -10   0  697.20   30.63
   1 -10   0  690.42   30.83
  -1 -10  -1   84.18    6.52
   1 -10   1   88.44    4.92
   1 -10   1   93.08    4.92
   1 -10   1   86.66    4.76
  -1 -10  -2    2.41    2.56
   1 -10   2    0.51    1.17
  -1 -10  -2    1.95    1.49
  -1 -10  -3  315.27   18.51
  -1 -10  -3  323.32   15.65
   1 -10   3  366.24   15.72
  -1 -10  -4  238.82   14.84
  -1 -10  -4  223.04   10.92
  -1 -10  -5  326.08   18.90
  -1 -10  -5  300.02   14.21
  -1 -10  -5  298.57   14.27
   1  10   6  172.42    8.27
  -1 -10  -6  151.50   12.48
  -1 -10  -6  159.29    8.46
   1 -10   6  159.38    8.02
   1  10   7   33.28    2.98
  -1 -10  -7   30.94    6.25
  -1 -10  -7   27.75    3.13
   1 -10   7   26.54    2.74
   1 -10   7   36.80    2.87
   1  10   8   54.68    3.99
   1 -10   8   49.10    3.86
  -1 -10  -8   51.51    4.09
   1 -10   8   55.91    3.94
   1 -10   9    3.56    2.21
   1  10   9    7.18    2.36
  -1 -10  -9    3.46    4.84
  -1 -10  -9    5.23    2.16
   1 -10   9    4.48    2.12
   1  10   9    4.05    2.08
  -1 -10 -10   88.71   10.52
  -1 -10 -10   88.98    5.64
   1 -10  10   90.17    5.52
   1  10  10   90.31    5.22
   1  10  11   98.13    5.62
   1 -10  11   98.20    5.95
  -1 -10 -11  100.72    5.87
  -1 -10 -11  108.37    6.78
   1  10  12    2.17    1.82
  -1 -10 -12    5.09    2.45
   1  10  13    4.68    1.53
  -1 -10 -13    3.93    1.90
   1  10  14    3.44    1.19
  -1  11  13    2.56    1.38
  -1  11  12    6.75    1.86
  -1 -11  12    6.37    2.05
   1 -11 -12    6.80    1.87
  -1 -11  11   28.43    3.27
   1 -11 -11   29.49    3.13
   1 -11 -11   33.94    3.60
   1 -11 -10   16.36    3.22
  -1 -11  10   18.19    3.01
   1 -11 -10   17.55    2.79
  -1 -11  10   15.11    2.26
   1 -11  -9    3.00    2.56
   1 -11  -9   -1.67    4.48
   1 -11  -9   -0.86    4.41
  -1 -11   9    1.12    2.47
   1 -11  -9    1.40    2.36
  -1 -11   9    3.26    1.94
   1 -11  -8    9.55    2.81
   1 -11  -8    5.82    4.95
   1 -11  -8    9.88    5.07
  -1 -11   8    8.51    2.04
   1 -11  -8    8.44    2.48
  -1 -11   7   18.86    2.36
   1 -11  -7   18.29    2.81
   1 -11  -6   60.02    4.34
  -1 -11   6   57.28    4.34
   1 -11  -6   52.67    4.26
  -1  11   6   63.88    3.91
  -1 -11   6   59.85    3.85
   1 -11  -6   58.26    4.57
   1 -11  -5  210.08   15.19
   1 -11  -5  243.81   11.98
  -1 -11   5  250.04   11.91
   1 -11  -5  234.73   11.69
  -1  11   5  232.72   11.13
   1 -11  -5  246.10   12.07
  -1 -11   4   15.59    2.19
  -1  11   4    8.87    1.50
   1 -11  -4   11.41    2.16
   1 -11  -4   13.25    2.22
   1 -11  -4   17.39    4.31
  -1 -11   4    8.86    2.42
   1 -11  -3  455.77   24.46
   1 -11  -3  479.23   21.38
  -1 -11   3  475.26   21.88
  -1 -11   2   15.43    2.38
   1 -11  -2   19.82    2.16
  -1 -11   2   20.91    2.43
   1 -11  -2   12.84    3.36
  -1 -11   1   84.47    5.22
   1 -11  -1   84.93    4.88
  -1 -11   1   83.69    4.61
   1 -11  -1   88.04    4.83
   1 -11   0  125.49    6.39
  -1 -11   0  123.90    6.65
   1 -11   0  117.82    6.24
   1 -11   0  104.41    6.92
  -1 -11   0  118.87    6.00
   1 -11   0  124.95    6.27
  -1 -11  -1    0.85    1.20
   1 -11   1    1.99    1.51
  -1 -11  -1    0.37    2.24
   1 -11   1    1.57    1.40
  -1 -11  -1    3.38    1.68
   1 -11   2  479.37   21.78
  -1 -11  -2  430.63   21.72
   1 -11   2  492.50   21.84
  -1 -11  -2  458.04   24.24
   1 -11   3    2.27    1.38
  -1 -11  -3    0.45    1.55
  -1 -11  -3    5.57    3.38
  -1 -11  -4  102.03    5.82
  -1 -11  -4  103.89    5.97
  -1 -11  -4  100.80    8.87
  -1 -11  -5  222.78   10.98
  -1 -11  -5  220.83   15.27
  -1 -11  -5  218.61   10.97
  -1 -11  -6  165.42   13.50
  -1 -11  -6  169.89    9.23
   1 -11   6  183.37    8.68
   1  11   7    4.84    1.94
  -1 -11  -7    0.83    4.76
   1 -11   7    4.89    1.91
  -1 -11  -7   10.01    2.53
   1 -11   7    9.07    1.99
   1  11   8    3.24    2.09
  -1 -11  -8    6.05    5.02
   1 -11   8    6.54    2.19
   1 -11   8    4.92    2.14
  -1 -11  -8    1.93    2.43
  -1 -11  -9    7.08    5.45
   1  11   9    8.40    1.96
   1  11   9   10.82    2.39
  -1 -11  -9    8.60    2.48
   1 -11   9    8.98    2.23
  -1 -11 -10   45.93    7.70
  -1 -11 -10   51.28    4.10
   1 -11  10   55.57    3.92
   1  11  10   51.76    3.61
   1  11  10   47.04    3.56
  -1 -11 -10   60.26    4.99
  -1 -11 -11   -0.89    2.36
   1  11  11   -0.94    1.69
  -1 -11 -12   60.91    4.44
   1  11  12   56.00    3.46
   1  11  13    0.13    1.12
  -1 -11 -13   -0.14    1.60
  -1 -11 -13    0.11    1.36
   1  11  13    0.07    1.25
  -1  12  13   34.41    2.22
   1 -12 -12   -0.86    1.54
  -1 -12  12    1.55    1.71
  -1  12  12    1.19    1.40
   1 -12 -11   72.87    5.29
   1 -12 -11   71.76    4.79
  -1 -12  11   74.11    4.69
   1 -12 -10    3.25    2.63
  -1 -12  10   -0.82    2.19
   1 -12 -10    0.75    2.24
   1 -12  -9  283.66   13.54
  -1 -12   9  259.05   12.62
   1 -12  -9  274.38   13.89
   1 -12  -9  242.68   17.83
   1 -12  -9  271.71   18.17
  -1 -12   9  280.42   13.22
   1 -12  -8   48.91    4.47
   1 -12  -8   52.39    7.62
  -1 -12   8   52.51    3.58
   1 -12  -7   30.49    6.00
  -1 -12   7   24.50    2.49
   1 -12  -7   24.42    3.38
  -1 -12   6   72.51    4.46
   1 -12  -6   83.98    5.35
  -1  12   6   78.41    4.48
  -1 -12   6   78.37    5.16
   1 -12  -6   75.60    5.15
   1 -12  -6   68.56    5.34
   1 -12  -5  806.13   36.83
   1 -12  -5  870.70   36.99
   1 -12  -5  745.47   40.59
  -1 -12   5  883.34   36.69
  -1  12   5  802.29   35.82
  -1 -12   4  262.24   13.10
   1 -12  -4  220.96   15.41
   1 -12  -4  249.72   12.67
   1 -12  -4  269.24   12.93
  -1 -12   4  260.75   12.51
   1 -12  -3  354.71   16.90
   1 -12  -3  321.46   19.37
  -1 -12   3  388.69   17.32
   1 -12  -3  360.92   16.78
   1 -12  -2   48.46    3.57
  -1 -12   2   42.47    3.85
   1 -12  -1  111.18    6.01
  -1 -12   1  110.83    5.80
   1 -12  -1  117.41    6.23
  -1 -12   1  114.63    6.55
   1 -12  -1  106.23    6.06
   1 -12  -1  108.01    7.47
  -1 -12   0  107.40    5.74
   1 -12   0  115.11    6.10
  -1 -12   0  121.31    6.56
   1 -12   0  114.42    6.17
   1 -12   0  105.19    6.03
  -1 -12  -1  409.43   18.57
   1 -12   1  405.43   18.90
  -1 -12  -1  420.95   19.31
   1 -12   1  416.09   19.00
   1 -12   1  437.09   18.92
   1 -12   2  266.17   11.61
   1 -12   2  237.09   11.64
   1 -12   2  245.47   11.67
  -1 -12  -2  221.39   11.34
  -1 -12  -2  224.44   13.94
  -1 -12  -3   69.86    6.88
  -1 -12  -3   71.09    4.56
  -1 -12  -3   66.87    4.82
   1 -12   3   83.75    4.76
   1 -12   3   79.93    5.15
  -1 -12  -4  159.03   11.90
  -1 -12  -4  156.50    8.54
   1 -12   4  167.38    8.69
  -1 -12  -5   83.48    8.92
  -1 -12  -5   85.75    5.63
   1 -12   5   91.16    5.53
  -1 -12  -6    2.33    4.78
   1 -12   6    2.89    1.77
  -1 -12  -6    3.21    2.23
  -1 -12  -7   56.93    8.22
  -1 -12  -7   56.41    4.49
   1 -12   7   54.26    3.81
   1 -12   8   -0.14    1.90
  -1 -12  -8    1.98    2.32
  -1 -12  -8   -2.54    5.47
   1  12   8    1.42    1.93
  -1 -12  -9  128.95   12.44
  -1 -12  -9  149.71    8.12
   1 -12   9  145.41    7.59
   1 -12  10  282.82   13.26
  -1 -12 -10  288.46   13.63
   1  12  10  279.71   12.87
  -1 -12 -10  306.64   14.41
   1  12  10  269.96   13.14
  -1 -12 -11   27.33    3.33
  -1 -12 -12    3.46    1.85
   1  12  12    5.13    1.47
  -1 -12 -12    5.45    2.06
   1  12  13    7.12    1.15
  -1 -12 -13    8.25    1.67
  -1  13  12   42.92    2.64
  -1 -13  12   48.65    3.05
   1 -13 -12   44.61    3.03
  -1  13  11    7.65    1.58
   1 -13 -11    8.66    2.16
  -1 -13  11    9.42    1.91
   1 -13 -11    9.59    2.30
   1 -13 -10  288.29   13.68
  -1 -13  10  274.23   13.23
   1 -13 -10  278.12   13.98
  -1 -13   9   72.78    4.21
   1 -13  -9   78.27    5.57
  -1 -13   9   70.60    4.82
   1 -13  -9   79.31    5.37
  -1 -13   8    9.53    1.78
   1 -13  -8   12.39    2.92
   1 -13  -7   19.33    3.22
   1 -13  -7   20.01    3.14
  -1 -13   7   22.77    2.27
   1 -13  -7   19.34    5.43
   1 -13  -7   23.16    3.00
   1 -13  -6    2.13    4.08
   1 -13  -6    3.12    2.29
   1 -13  -6    7.85    2.55
  -1 -13   6    3.74    1.55
  -1 -13   6    7.14    2.39
   1 -13  -6    8.37    3.86
   1 -13  -6    7.63    2.68
   1 -13  -5  241.15   16.72
   1 -13  -5  273.17   16.98
   1 -13  -5  279.28   13.85
  -1 -13   5  294.86   13.38
   1 -13  -5  258.84   13.62
  -1 -13   4  377.30   17.38
  -1 -13   4  405.85   18.13
   1 -13  -4  357.52   17.50
   1 -13  -4  371.36   17.67
   1 -13  -4  356.34   20.58
   1 -13  -4  378.71   17.93
   1 -13  -4  335.06   20.69
   1 -13  -3   92.87    5.66
  -1 -13   3  101.85    6.14
   1 -13  -3   92.32    5.98
   1 -13  -3   87.63    7.62
   1 -13  -3   83.58    5.53
   1 -13  -2   29.03    2.80
   1 -13  -2   26.17    2.93
  -1 -13   2   29.82    3.16
   1 -13  -2   25.99    2.79
   1 -13  -2   27.92    4.04
   1 -13  -1   51.10    3.70
  -1 -13   1   49.48    4.03
   1 -13  -1   49.35    3.67
  -1 -13   1   54.03    3.95
   1 -13  -1   41.46    3.36
  -1 -13   1   42.84    3.21
   1 -13   0   88.40    5.33
  -1 -13   0   95.69    5.88
  -1 -13   0   88.91    4.97
   1 -13   0   89.77    5.26
   1 -13   1    1.89    1.59
  -1 -13  -1    3.74    2.02
   1 -13   1    2.94    1.49
   1 -13   1    1.16    1.82
  -1 -13  -1    4.38    1.58
   1 -13   2  477.13   22.45
  -1 -13  -2  479.90   22.03
   1 -13   2  524.28   22.41
   1 -13   2  515.75   23.13
  -1 -13  -3   -1.08    2.04
   1 -13   3    0.84    1.96
  -1 -13  -3    4.26    3.71
  -1 -13  -4   62.67    7.48
  -1 -13  -4   67.75    4.92
   1 -13   4   79.12    5.16
  -1 -13  -4   80.49    5.40
  -1 -13  -5  165.99    8.88
   1 -13   5  161.57    8.76
  -1 -13  -5  156.81   12.28
  -1 -13  -6   19.77    3.10
   1 -13   6   15.01    2.11
  -1 -13  -6   14.84    5.30
  -1 -13  -7   23.66    3.28
   1 -13   7   24.77    2.51
  -1 -13  -7   29.13    3.05
  -1 -13  -7   20.82    5.48
  -1 -13  -8  285.19   13.78
   1 -13   8  274.75   12.96
  -1 -13  -8  268.07   18.15
   1  13   9    1.86    1.95
  -1 -13  -9   -0.92    2.16
   1 -13   9    2.42    1.76
  -1 -13  -9   -1.42    2.51
   1 -13  10   25.24    2.46
  -1 -13 -10   30.94    3.66
   1  13  11   33.81    2.38
  -1 -13 -11   31.96    3.43
  -1 -13 -11   36.42    3.38
  -1 -13 -12   13.90    2.15
  -1 -13 -12   15.26    2.06
   1 -14 -11   22.01    2.41
  -1 -14  11   23.92    2.15
   1 -14 -10   -0.16    1.99
  -1 -14  10    2.70    1.70
   1 -14 -10    0.19    2.25
  -1 -14   9   42.43    3.38
   1 -14  -9   43.56    3.87
   1 -14  -8   80.21    5.53
   1 -14  -8   73.81    5.52
   1 -14  -7   90.78    6.12
   1 -14  -7   93.34    6.28
   1 -14  -7   75.06    8.62
   1 -14  -7   98.88    6.07
   1 -14  -6    4.05    3.52
   1 -14  -6    4.76    4.49
   1 -14  -6    2.50    2.35
   1 -14  -6    5.75    2.61
   1 -14  -6    2.01    2.56
  -1 -14   6    3.98    1.94
  -1 -14   5  191.26    9.52
   1 -14  -5  184.25    9.92
   1 -14  -5  193.98   13.23
   1 -14  -5  191.14   10.26
   1 -14  -5  157.15   12.72
   1 -14  -4  124.87    7.58
  -1 -14   4  152.40    8.23
  -1 -14   4  137.75    7.38
   1 -14  -4  115.23    9.83
   1 -14  -4  139.81    8.06
   1 -14  -4  134.66    7.68
   1 -14  -3  165.98    9.13
  -1 -14   3  190.66    9.57
  -1 -14   3  164.02    8.72
   1 -14  -3  176.56    8.91
   1 -14  -3  154.43   11.11
   1 -14  -3  183.07    9.68
   1 -14  -3  161.80    8.96
   1 -14  -2  102.74    6.24
   1 -14  -2  105.74    6.25
  -1 -14   2  121.44    6.87
   1 -14  -2  109.41    6.58
   1 -14  -2  120.40    6.69
   1 -14  -2  119.79    7.19
   1 -14  -1   13.10    2.31
   1 -14  -1   13.06    2.35
  -1 -14   1   16.28    2.54
   1 -14  -1   14.78    2.92
  -1 -14   1   14.27    2.87
   1 -14  -1   15.19    2.61
  -1 -14   0   77.95    5.55
   1 -14   0   86.62    5.37
  -1 -14   0   83.12    4.84
   1 -14   0   84.56    5.16
   1 -14   1  154.01    8.45
  -1 -14  -1  161.54    8.16
   1 -14   1  172.08    8.42
   1 -14   1  185.51    9.48
  -1 -14  -1  156.90    8.93
   1 -14   1  160.70    8.55
  -1 -14  -2    0.37    1.64
   1 -14   2    2.73    2.16
   1 -14   2    2.08    1.62
  -1 -14  -2    5.36    2.60
   1 -14   3  223.66   11.37
  -1 -14  -3  211.09   10.38
   1 -14   4  443.36   20.38
  -1 -14  -4  405.74   23.28
  -1 -14  -5   14.39    4.57
   1 -14   5    8.10    2.32
  -1 -14  -5    6.94    2.98
  -1 -14  -6    3.40    2.84
  -1 -14  -6    1.21    2.52
   1 -14   6    2.29    1.57
  -1 -14  -6    2.76    4.29
  -1 -14  -7   70.26    8.21
  -1 -14  -7   76.06    5.00
  -1 -14  -7   68.18    5.16
   1 -14   7   70.09    4.20
   1 -14   8    3.78    1.57
   1  14   9  160.00    8.25
   1 -14   9  155.53    7.88
  -1 -14 -10   60.96    4.71
  -1 -14 -10   62.89    4.60
  -1 -14 -11   36.32    3.35
  -1 -14 -11   40.98    3.24
  -1 -14 -12    5.92    1.59
  -1 -14 -12    7.98    1.53
   1 -15 -11    7.20    1.84
  -1 -15  11    3.69    1.11
  -1 -15  10   10.36    1.63
   1 -15 -10    6.45    1.95
  -1 -15   9   17.37    2.11
   1 -15  -9   18.38    2.67
   1 -15  -8   42.36    3.91
   1 -15  -8   44.39    4.01
  -1 -15   8   46.54    3.38
   1 -15  -7  133.49   10.87
   1 -15  -7  131.53    8.00
   1 -15  -7  151.68    8.24
   1 -15  -7  146.98    8.05
   1 -15  -6   20.37    2.95
   1 -15  -6   20.95    4.67
   1 -15  -6   16.71    3.00
  -1 -15   5  106.28    6.28
   1 -15  -5  115.09    7.27
  -1 -15   5  129.83    6.88
   1 -15  -5  112.37    6.86
   1 -15  -4   61.64    4.74
  -1 -15   4   63.93    4.29
   1 -15  -4   67.70    5.14
   1 -15  -4   61.64    4.51
   1 -15  -4   60.17    4.68
   1 -15  -4   63.53    5.04
  -1 -15   3    0.64    2.42
   1 -15  -3    0.58    2.38
  -1 -15   3    1.67    1.81
   1 -15  -3    0.48    2.04
   1 -15  -3    1.43    2.41
   1 -15  -3    2.18    2.63
   1 -15  -3    0.18    1.87
   1 -15  -2   24.03    2.74
   1 -15  -2   26.49    3.00
   1 -15  -2   30.64    3.20
  -1 -15   2   31.47    3.37
   1 -15  -2   23.64    2.96
   1 -15  -2   26.52    3.60
   1 -15  -1   -0.93    2.15
  -1 -15   1    0.40    2.25
   1 -15  -1    3.90    2.42
   1 -15  -1    0.18    1.98
  -1 -15   0  136.74    7.39
   1 -15   0  139.06    7.72
  -1 -15   0  153.92    8.48
   1 -15   0  139.36    7.91
   1 -15   0  151.69    7.69
  -1 -15   0  160.65    8.37
  -1 -15  -1  123.12    6.69
  -1 -15  -1  136.42    7.73
   1 -15   1  115.86    7.01
   1 -15   1  135.70    7.94
   1 -15   1  136.92    6.96
   1 -15   2    2.86    2.41
  -1 -15  -2    5.95    2.68
  -1 -15  -2    6.10    1.83
  -1 -15  -3   17.05    2.27
   1 -15   3   12.74    2.89
   1 -15   4  115.07    7.10
  -1 -15  -4  122.02    6.50
  -1 -15  -5   73.14    4.61
  -1 -15  -5   66.46    7.59
   1 -15   5   63.93    4.87
  -1 -15  -5   76.40    5.60
  -1 -15  -6  340.66   16.01
  -1 -15  -6  325.82   15.95
  -1 -15  -6  330.37   15.83
  -1 -15  -7    2.17    2.71
  -1 -15  -7    2.22    2.49
  -1 -15  -7    2.77    2.01
  -1 -15  -8   99.33    6.30
  -1 -15  -8   95.63    6.32
  -1 -15  -9    9.30    2.48
   1  15   9    6.06    1.86
  -1 -15 -10   18.37    2.73
  -1 -15 -10   16.47    2.42
  -1 -15 -11    6.82    1.86
  -1 -15 -11    7.55    1.78
   1 -16 -10    7.66    1.64
   1 -16  -9    4.49    1.75
  -1 -16   9    3.99    1.34
   1 -16  -8    1.82    2.10
   1 -16  -8    2.86    2.03
   1 -16  -8    1.97    2.05
  -1 -16   8    0.71    1.49
   1 -16  -8    1.36    2.19
   1 -16  -7   83.34    5.68
   1 -16  -7   97.38    5.98
   1 -16  -7   93.35    5.59
   1 -16  -7   78.74    5.51
   1 -16  -7  102.17    5.94
  -1 -16   7   86.19    4.97
   1 -16  -6   11.29    2.84
   1 -16  -6    7.56    2.59
   1 -16  -6    8.19    2.53
   1 -16  -6   12.02    2.50
   1 -16  -5    2.94    2.61
   1 -16  -5    1.93    2.22
   1 -16  -5    2.93    2.71
  -1 -16   5    5.44    2.03
   1 -16  -5    6.51    2.73
   1 -16  -5    4.20    2.34
  -1 -16   5    4.05    1.64
   1 -16  -4   28.96    3.21
   1 -16  -4   31.77    3.43
   1 -16  -4   32.10    3.60
   1 -16  -4   38.09    4.02
   1 -16  -4   34.85    3.49
  -1 -16   4   31.55    2.83
   1 -16  -3  182.85    9.98
  -1 -16   3  206.63   10.57
   1 -16  -3  195.64   10.86
   1 -16  -3  204.06   10.15
  -1 -16   3  190.40    9.77
   1 -16  -2   38.55    3.97
   1  16  -2   31.26    2.77
   1 -16  -2   31.16    3.46
   1 -16  -2   31.25    3.34
  -1 -16   2   30.48    2.85
  -1 -16   2   31.53    3.53
   1 -16  -1   59.35    4.46
  -1 -16   1   54.95    4.53
   1 -16  -1   58.97    4.11
   1 -16  -1   56.65    4.95
   1 -16  -1   60.45    4.40
   1 -16   0   28.29    3.22
   1 -16   0   30.73    2.88
  -1 -16   0   34.02    3.50
  -1 -16   0   29.57    3.70
   1 -16   0   33.85    3.30
  -1 -16  -1    4.26    2.75
   1 -16   1    4.23    2.82
  -1 -16  -1    2.99    1.74
  -1 -16  -2   85.54    5.85
   1 -16   2   76.10    5.69
  -1 -16  -2   76.39    4.65
  -1 -16  -2   73.64    4.83
  -1 -16  -3    7.01    2.83
   1 -16   3    8.31    2.73
  -1 -16  -3    9.65    2.27
  -1 -16  -3    8.99    2.04
   1 -16   4   20.16    3.10
  -1 -16  -4   27.47    3.11
  -1 -16  -4   21.67    2.48
  -1 -16  -5   57.77    4.46
  -1 -16  -5   55.37    4.55
   1 -16   5   49.07    4.06
  -1 -16  -5   53.18    3.69
  -1 -16  -6   36.09    3.73
  -1 -16  -6   39.26    3.64
  -1 -16  -6   33.64    2.96
  -1 -16  -6   36.91    4.00
  -1 -16  -7   73.87    5.02
  -1 -16  -7   73.72    5.03
  -1 -16  -7   57.79    4.39
  -1 -16  -7   61.10    4.02
  -1 -16  -8   16.06    2.74
  -1 -16  -8   15.86    2.83
  -1 -16  -8   17.39    2.07
   1  16   8   17.67    2.35
  -1 -16  -9   88.46    5.31
  -1 -16  -9   80.96    5.27
   1  16   9   80.63    4.57
  -1 -16  -9   82.66    4.49
  -1 -16 -10    6.96    1.83
   1 -17  -9    5.08    1.50
   1 -17  -9    3.31    1.71
   1 -17  -8   71.86    4.26
   1 -17  -8   73.28    4.73
   1 -17  -7    3.94    2.23
   1 -17  -7   -0.81    1.69
   1 -17  -7    1.26    1.82
   1 -17  -7    1.78    1.94
   1 -17  -6   14.73    2.74
   1 -17  -6   14.77    2.70
   1 -17  -6   13.07    2.44
   1 -17  -6   13.42    2.44
   1 -17  -5   67.58    4.86
   1 -17  -5   60.33    4.95
   1 -17  -5   59.59    4.43
   1 -17  -5   66.34    4.40
   1 -17  -4  314.58   14.45
   1 -17  -4  293.54   14.73
  -1 -17   4  299.75   14.29
   1 -17  -4  311.02   13.99
   1 -17  -4  256.37   13.81
   1 -17  -3   18.26    2.98
   1 -17  -3   12.60    2.52
   1 -17  -3   17.03    3.20
  -1 -17   3   20.74    3.09
  -1 -17   2   55.14    4.43
   1 -17  -2   55.46    3.98
   1  17  -2   52.67    3.64
   1 -17  -2   59.68    4.52
   1 -17  -2   58.35    4.39
   1 -17  -2   61.42    4.92
  -1 -17   1   25.99    2.55
   1 -17  -1   24.92    3.03
   1 -17  -1   23.52    2.94
  -1 -17   1   23.06    3.01
   1 -17  -1   19.53    2.54
   1  17  -1   26.47    2.64
   1 -17  -1   21.37    3.54
  -1 -17   0   13.97    2.79
  -1 -17  -1   20.53    3.07
  -1 -17  -1   21.12    3.32
   1 -17   1   16.82    3.34
  -1 -17  -2  235.74   11.64
   1 -17   2  247.11   12.82
  -1 -17  -2  270.58   12.87
  -1 -17  -3   11.32    2.92
  -1 -17  -3   12.27    2.05
   1 -17   3   14.16    2.89
  -1 -17  -4  141.30    7.85
  -1 -17  -4  146.60    8.44
  -1 -17  -4  142.69    7.33
  -1 -17  -4  147.17    8.47
   1 -17   4  148.90    8.17
  -1 -17  -5   20.31    2.80
  -1 -17  -5   20.39    2.34
  -1 -17  -5   25.82    3.32
  -1 -17  -6   86.94    5.35
  -1 -17  -6   80.51    5.51
  -1 -17  -6   87.82    5.42
  -1 -17  -6   72.45    4.48
  -1 -17  -7    2.38    1.48
   1  17   7    2.43    1.87
  -1 -17  -7    3.61    2.23
  -1 -17  -7    2.22    1.88
  -1 -17  -7    5.59    2.23
  -1 -17  -8   81.70    5.04
   1  17   8   73.91    4.49
  -1 -17  -8   84.29    5.03
  -1 -17  -9    3.12    1.63
   1  17   9    1.87    1.20
  -1 -17  -9    1.06    1.64
   1 -18  -8   10.30    1.61
   1 -18  -8   13.44    1.91
   1 -18  -7   64.70    3.87
   1 -18  -7   58.55    3.92
   1 -18  -7   69.21    4.29
   1 -18  -6    2.38    1.96
   1 -18  -6    4.73    1.97
   1 -18  -6    2.83    1.70
   1 -18  -5   18.01    2.76
   1 -18  -5   16.49    2.76
   1 -18  -5   22.67    2.52
   1 -18  -4   29.55    3.26
   1 -18  -4   27.34    2.93
   1 -18  -4   27.04    3.51
  -1 -18   4   24.69    2.97
   1 -18  -3  167.79    8.86
  -1 -18   3  175.11    9.01
   1 -18  -3  158.90    9.25
   1 -18  -3  157.54    8.39
   1 -18  -2   36.38    3.25
  -1 -18   2   37.34    3.44
   1 -18  -2   37.86    3.55
   1 -18  -2   32.82    3.87
  -1 -18   2   34.15    3.81
  -1 -18   1   42.55    4.23
  -1 -18   1   48.35    3.88
   1 -18  -1   40.79    3.60
   1  18  -1   40.14    3.13
  -1 -18   0  170.18    9.00
   1  18   0  173.79    8.58
   1 -18   0  155.28    9.40
  -1 -18  -1   70.97    5.02
   1  18   1   71.35    4.71
   1 -18   1   70.63    5.53
  -1 -18  -1   75.45    5.57
  -1 -18  -2   22.29    3.11
  -1 -18  -2   14.36    3.01
   1 -18   2   19.32    3.22
  -1 -18  -2   20.69    3.44
  -1 -18  -3   46.77    4.00
  -1 -18  -3   48.06    4.26
   1 -18   3   38.58    3.96
  -1 -18  -3   49.44    4.36
  -1 -18  -4   63.91    4.74
   1 -18   4   57.02    4.31
  -1 -18  -4   58.89    4.60
   1  18   5    3.06    2.16
  -1 -18  -5    5.04    2.23
  -1 -18  -6    4.31    1.99
  -1 -18  -6    0.14    1.70
   1  18   7   18.38    2.14
  -1 -18  -7   21.42    2.53
  -1 -18  -7   15.47    2.00
  -1 -18  -7   16.91    2.22
  -1 -18  -8    0.58    1.49
   1  18   8    0.95    1.25
  -1 -18  -8    0.13    1.63
   1 -19  -7   10.19    1.41
   1 -19  -7    6.19    1.23
   1 -19  -7   11.27    1.75
   1 -19  -6    7.41    1.79
   1 -19  -6    6.64    1.57
   1 -19  -6    6.14    1.80
   1 -19  -5    5.15    2.10
   1 -19  -5    4.27    1.58
   1 -19  -5    5.24    1.88
   1 -19  -4   18.19    2.70
   1 -19  -4   13.96    2.15
   1 -19  -4   17.17    2.47
   1 -19  -3   18.63    2.58
   1 -19  -3   21.35    3.05
  -1 -19   3   23.53    2.89
   1 -19  -2  125.79    7.91
  -1 -19   2  151.06    7.97
   1  19  -1   57.62    3.67
  -1 -19   1   56.13    4.14
  -1 -19   1   65.69    4.82
   1  19   0  136.65    7.26
   1 -19   0  136.20    8.18
  -1 -19   0  151.87    7.74
   1  19   1    2.08    1.88
  -1 -19  -1    5.85    2.52
   1 -19   1    1.28    2.39
  -1 -19  -1    4.71    2.15
   1  19   2    6.32    2.20
  -1 -19  -2    4.26    2.50
   1 -19   2   -1.60    2.33
  -1 -19  -2    2.43    2.02
   1  19   3    1.34    1.97
  -1 -19  -3    4.64    2.30
   1 -19   3    0.71    2.04
  -1 -19  -3   -0.73    2.27
  -1 -19  -3    0.32    1.96
  -1 -19  -4    7.01    2.15
   1  19   4    2.70    1.93
  -1 -19  -4    2.92    2.01
  -1 -19  -4    4.52    2.05
  -1 -19  -5    5.42    2.00
  -1 -19  -5    8.55    2.23
  -1 -19  -5    9.02    2.02
   1  19   5    8.80    1.91
  -1 -19  -6   85.05    4.90
   1  19   7   -0.52    1.23
   1 -20  -5   21.47    2.28
   1 -20  -5   14.08    1.90
   1 -20  -4    4.76    1.89
   1 -20  -3   12.67    2.38
   1 -20  -2    9.87    2.44
  -1 -20   2    9.21    2.29
  -1 -20   1  179.81    9.37
  -1 -20   0   32.16    3.49
   1 -20   0   32.20    3.45
  -1  20   0   40.21    2.73
   1  20   0   36.89    2.73
  -1 -20  -1   35.05    3.51
   1 -20   1   34.94    3.44
   1  20   1   38.35    2.90
  -1 -20  -2    3.98    2.11
   1 -20   2    5.47    2.01
   1  20   2    2.61    1.73
   1  20   3   11.34    1.94
  -1 -20  -3    9.95    1.88
  -1 -20  -3   10.62    2.40
  -1 -20  -4   33.61    2.68
  -1 -20  -4   32.31    3.01
   1  20   4   35.57    2.71
  -1 -20  -5   44.18    2.95
  -1 -20  -5   44.90    3.21
   1  20   5   45.61    3.07
   1 -21  -3   37.72    3.06
  -1  21   3   44.13    2.81
   1 -21  -2   31.68    2.86
  -1 -21   2   31.83    2.74
  -1  21   2   39.91    2.58
  -1 -21   1   14.27    2.12
  -1  21   1   12.49    1.60
  -1 -21   0    2.00    1.78
   1 -21   0    1.03    1.55
   1 -21   1    5.48    1.83
   1  21   1    3.65    1.31
   1 -21   2   12.73    1.88
  -1 -21  -2    8.86    1.92
   1  21   2   10.58    1.55
   1  21   3   67.21    3.80
  -1 -21  -3   67.85    4.20
  -2   0  15    0.58    1.33
   2   0 -15    0.70    2.49
  -2   0  14  237.16   11.16
  -2   0  13   -0.13    2.03
  -2   0  13   -3.29    2.39
  -2   0  13    0.83    4.54
  -2   0  12   46.76    4.39
  -2   0  12   54.03    8.26
  -2   0  11    1.66    4.98
  -2   0  11    1.63    1.85
  -2   0  11   -1.42    2.59
  -2   0  10  234.65   10.95
  -2   0  10  223.08   15.75
  -2   0  10  230.21   10.63
  -2   0  10  198.60   11.12
  -2   0   9   -1.36    3.60
  -2   0   9    0.63    1.41
  -2   0   9    0.25    1.55
   2   0  -9    1.56    2.79
  -2   0   8 1208.10   61.32
  -2   0   8 1336.72   56.98
   2   0  -8 1302.17   60.50
  -2   0   8 1349.65   57.16
   2   0  -8 1353.49   63.31
  -2   0   8 1343.01   57.11
  -2   0   7   -0.71    1.00
  -2   0   7    0.65    1.11
   2   0  -7   -0.63    3.52
  -2   0   7    1.45    1.13
  -2   0   7   -0.50    2.57
   2   0  -7    2.01    2.28
  -2   0   6  943.23   47.69
  -2   0   6 1041.22   44.51
   2   0  -6 1121.28   47.35
   2   0  -6 1041.71   48.84
   2   0  -5   -0.91    2.15
  -2   0   5    1.14    1.89
   2   0  -5    0.30    1.54
  -2   0   4    6.05    2.01
   2   0  -4    3.24    1.51
  -2   0   3   -0.31    1.63
   2   0  -3   -0.42    1.18
  -2   0   2 3245.47  149.56
   2   0  -2 3562.55  147.56
  -2   0   1    0.86    0.69
  -2   0   0 2408.20  101.90
   2   0   1    0.14    1.01
   2   0   2 3245.73  137.92
   2   0   3    0.18    1.28
   2   0   4  581.63   26.68
   2   0   5    1.08    1.69
   2   0   6  805.86   38.99
   2   0   6  865.65   36.66
   2   0   7    2.37    2.94
   2   0   7    0.80    1.23
   2   0   8    5.18    3.58
   2   0   9   -0.63    1.75
   2   0   9    0.53    1.81
   2   0   9    1.89    1.89
   2   0   9    2.19    3.33
   2   0  10  129.64    7.57
   2   0  10  150.06   11.44
   2   0  10  149.51    7.72
   2   0  11   -0.17    2.05
   2   0  11    2.04    4.44
   2   0  11    0.33    2.67
   2   0  12   11.90    4.85
   2   0  12   12.33    2.72
   2   0  12    8.03    2.26
  -2   0 -12    6.94    5.36
   2   0  13    1.53    2.14
   2   0  13   -2.93    2.72
   2   0  13    1.77    2.02
   2   0  14   15.48    2.14
   2   0  14   13.62    2.66
   2   0  14   15.87    2.36
   2   0  15    0.12    1.88
  -2   1  15   52.75    3.36
   2   1 -15   52.10    4.58
  -2   1  14    3.61    1.90
  -2  -1  14    1.21    1.65
  -2  -1  13   16.58    2.29
  -2   1  13   10.53    2.91
  -2   1  13   12.48    2.51
  -2   1  13    8.25    4.70
  -2  -1  13   14.64    5.35
  -2   1  12  114.69    6.88
  -2  -1  12  107.56    5.99
  -2   1  12  108.88   10.86
  -2  -1  12  102.06    8.79
  -2   1  11  191.90   15.29
  -2  -1  11  224.38   10.60
  -2   1  11  217.23   11.31
  -2   1  10    5.65    2.36
  -2  -1  10   11.10    2.21
  -2   1  10   10.61    4.77
   2  -1 -10    3.62    3.47
  -2  -1  10    6.33    1.85
  -2   1  10    7.05    1.66
  -2  -1   9  492.23   21.76
  -2   1   9  486.92   21.65
  -2  -1   9  482.77   21.54
  -2   1   9  499.67   21.45
  -2   1   9  405.88   25.89
   2  -1  -9  455.18   25.17
   2  -1  -8    0.98    2.86
  -2   1   8    1.86    1.21
  -2  -1   8    2.84    1.29
  -2  -1   8    3.11    1.46
  -2   1   8    2.82    1.35
   2   1  -8   -0.74    4.20
  -2   1   8    1.78    3.69
  -2   1   8    1.50    1.37
   2   1  -7  722.20   35.32
   2  -1  -7  732.44   35.80
  -2   1   7  734.33   36.39
  -2   1   7  754.34   32.63
  -2  -1   7  743.41   32.72
  -2  -1   7  765.92   32.58
  -2   1   7  743.73   32.73
  -2   1   7  777.32   32.51
   2   1  -7  747.46   37.56
  -2   1   6  159.22   10.72
  -2   1   6  174.37    7.99
  -2  -1   6  172.34    8.07
  -2   1   6  171.27    8.08
   2  -1  -6  159.51   10.26
   2   1  -6  167.11   10.08
   2   1  -6  184.93   11.95
   2  -1  -5   95.24    6.80
  -2   1   5  102.58    7.31
  -2   1   4    2.00    1.71
   2  -1  -4    1.86    1.46
  -2   1   3 1379.22   60.05
   2  -1  -3 1338.23   59.14
  -2   1   2 1012.34   45.05
   2  -1  -2  997.89   43.43
  -2  -1   1 9254.43  389.78
  -2  -1   0 3768.39  157.35
  -2   1   0 3684.42  157.03
   2   1   0 3762.50  158.64
   2   1   1  341.67   15.39
   2   1   1  320.05   15.51
   2   1   2   86.19    5.09
   2   1   2   89.93    5.37
   2   1   3 2101.49   90.15
   2   1   4 1837.47   79.43
   2   1   5   14.80    2.61
   2   1   6   80.48    6.39
   2   1   6   88.47    4.48
   2   1   7  667.36   32.89
   2   1   7  696.96   30.01
   2   1   8   87.20    7.73
   2   1   8   94.53    5.14
   2  -1   9  150.71    7.87
   2   1   9  156.29    8.00
   2   1   9  156.36   11.40
   2  -1   9  156.32    8.30
   2   1   9  158.70    8.17
   2   1   9  154.59    8.08
   2   1   9  171.49    8.34
   2   1  10  138.92    7.60
   2   1  10  141.06   11.11
   2  -1  10  133.21    7.62
   2   1  10  128.53    7.46
   2  -1  10  158.21    7.54
   2   1  10  138.95    7.53
   2   1  11   32.40    3.60
   2  -1  11   46.75    3.53
   2  -1  11   40.30    3.62
   2   1  11   34.51    3.42
   2   1  11   35.02    6.46
   2   1  12   37.46    6.56
   2  -1  12   28.26    3.24
   2   1  12   32.30    3.11
   2  -1  12   34.67    3.34
   2   1  12   34.78    3.65
  -2   1 -12   30.84    7.94
   2   1  13  121.62    7.07
   2  -1  13  132.35    6.80
   2   1  13  125.16    6.64
   2  -1  13  113.02    6.78
   2  -1  14    6.13    1.89
   2  -1  14    4.15    1.62
   2   1  14    4.92    2.48
   2   1  15   36.00    2.76
   2   1  15   33.33    2.52
   2   1  15   37.20    3.13
   2   2 -15    1.70    2.21
  -2  -2  15   -1.84    2.03
  -2   2  15    0.73    1.59
  -2   2  14    2.45    2.08
  -2  -2  14    3.59    1.52
  -2   2  13   26.15    3.38
  -2  -2  13   27.24    3.39
  -2  -2  13   24.22    2.46
  -2  -2  12   41.49    5.48
  -2  -2  12   43.42    3.47
  -2  -2  12   39.24    3.18
  -2   2  12   44.34    4.13
  -2  -2  12   37.54    4.01
  -2   2  12   47.53    7.56
  -2  -2  12   37.31    6.78
  -2   2  11    6.35    5.49
  -2  -2  11    3.87    4.55
   2  -2 -11    0.68    3.53
  -2  -2  11    1.86    3.58
  -2  -2  11    5.56    2.65
  -2   2  11    3.30    2.45
  -2  -2  11    3.67    1.93
  -2  -2  11    6.03    2.32
   2  -2 -10  174.58   12.94
  -2   2  10  181.15    9.56
  -2  -2  10  176.30    9.55
  -2  -2  10  191.05    9.47
  -2   2  10  163.18   13.23
  -2  -2  10  190.18   13.91
  -2  -2  10  189.77    9.15
  -2  -2   9   19.94    5.34
  -2   2   9   23.21    5.53
  -2  -2   9   22.51    2.54
   2  -2  -9   27.22    4.96
  -2   2   9   24.95    2.16
  -2  -2   9   22.51    2.30
  -2   2   8  301.94   14.44
   2   2  -8  317.14   19.46
   2  -2  -8  288.93   19.00
   2  -2  -8  306.72   17.81
  -2   2   8  297.48   18.19
  -2  -2   8  300.58   18.12
  -2   2   8  321.74   14.08
  -2   2   8  317.96   14.26
  -2  -2   8  319.87   14.48
   2  -2  -7  298.52   16.78
  -2  -2   7  295.83   13.77
  -2   2   7  303.16   13.57
  -2   2   7  319.80   13.46
  -2  -2   7  291.35   16.88
  -2   2   7  289.38   17.00
   2   2  -7  307.23   18.21
   2  -2  -7  270.54   17.74
  -2   2   7  289.64   13.78
  -2  -2   6  971.62   45.58
  -2   2   6  964.02   45.72
   2  -2  -6  996.73   46.72
   2   2  -6 1043.53   46.99
  -2   2   6  984.54   42.60
   2  -2  -6 1015.57   45.57
   2  -2  -5 1088.28   49.21
  -2   2   5 1115.77   49.56
  -2  -2   5 1070.23   49.33
   2  -2  -4 1988.49   87.08
  -2   2   4 1972.78   87.44
  -2  -2   4 2054.35   87.44
  -2  -2   3  101.62    5.88
   2  -2  -3  101.18    6.48
  -2   2   3  113.45    7.06
  -2  -2   3  115.05    7.01
   2  -2  -2    6.03    1.51
  -2   2   2    5.71    1.81
  -2  -2   2    6.12    1.84
  -2  -2   2    5.94    1.27
   2  -2  -1  427.68   18.96
  -2  -2   1  415.81   18.73
   2   2   0 1540.07   67.07
   2  -2   0 1560.01   67.13
   2   2   1 2438.04   98.08
   2  -2   1 2363.43   98.05
   2  -2   1 2203.09   98.12
   2   2   1 2183.19   98.07
   2   2   2 1340.44   57.12
   2  -2   2 1331.08   57.15
   2   2   2 1304.38   57.39
   2  -2   2 1312.46   57.43
   2   2   3   23.72    2.50
   2  -2   3   27.40    2.59
   2   2   4 1015.84   45.27
   2  -2   4 1034.87   45.26
   2   2   5  134.79    8.09
   2  -2   5  134.28    8.06
   2   2   6  466.08   22.64
   2  -2   6  466.77   22.61
   2  -2   6  471.18   20.29
   2   2   6  466.58   20.28
   2  -2   6  461.33   20.20
   2  -2   6  452.95   20.26
   2   2   7  346.02   18.11
   2  -2   7  339.51   18.07
   2  -2   7  352.08   15.35
   2   2   7  342.41   15.45
   2  -2   7  337.23   15.42
   2   2   8  111.66    6.00
   2  -2   8  109.12    5.93
   2   2   8  113.13    8.84
   2  -2   8  105.26    8.61
   2   2   8  114.71    5.95
   2  -2   8  112.36    5.81
   2  -2   8  114.07    6.18
   2   2   9  182.54    9.48
   2  -2   9  187.44    9.51
   2   2   9  188.17    9.51
   2  -2   9  203.14    9.88
   2  -2   9  204.73    9.39
   2   2   9  194.56    9.49
   2   2   9  176.77   12.51
   2  -2   9  196.02   12.96
   2   2  10   17.15    2.73
   2  -2  10   18.53    2.83
   2  -2  10   19.63    2.51
   2   2  10   21.87    2.84
   2  -2  10   17.40    2.91
   2   2  10   17.37    2.46
   2   2  10   21.21    4.88
   2  -2  10   17.02    4.77
   2   2  11  286.21   17.93
   2  -2  11  286.17   17.99
   2  -2  11  301.92   14.04
   2   2  11  304.55   14.02
   2  -2  11  271.49   14.11
   2   2  11  274.23   13.68
   2  -2  11  299.01   13.77
   2   2  11  288.11   13.97
  -2   2 -11  323.67   21.29
  -2  -2 -11  345.48   21.82
   2   2  12    5.39    4.33
   2  -2  12    6.74    4.24
   2  -2  12    8.74    2.59
   2   2  12    5.23    1.88
   2  -2  12   10.27    2.35
   2   2  12    5.85    2.58
   2  -2  12    5.21    2.55
   2   2  12    7.16    2.86
  -2  -2 -12    8.82    5.66
  -2   2 -12    3.30    5.90
   2   2  13    4.36    2.62
   2  -2  13    4.97    2.64
   2  -2  13    6.04    1.75
   2  -2  13    7.72    2.31
   2   2  13    5.19    2.34
   2  -2  13    3.62    2.12
   2   2  13    5.45    1.75
   2  -2  14  205.42   10.18
   2  -2  14  219.39   10.59
   2   2  14  223.29   10.62
   2  -2  15   23.53    2.55
   2   2  15   18.69    2.05
   2   2  15   23.95    2.60
   2   3 -15   34.42    3.55
   2  -3 -15   42.06    3.77
  -2   3  15   31.11    2.82
  -2   3  15   40.13    3.02
  -2  -3  15   38.88    2.94
  -2   3  14    4.23    2.19
  -2  -3  13   62.81    3.96
  -2   3  13   76.41    5.02
  -2  -3  13   73.02    4.96
  -2  -3  12    5.87    3.49
  -2  -3  12    6.49    1.76
  -2   3  12    7.84    2.69
  -2  -3  12    2.94    2.47
  -2   3  12    5.37    4.72
  -2  -3  12   11.82    5.02
  -2  -3  12    7.51    2.34
   2  -3 -11   66.41    8.20
  -2  -3  11   86.64    5.26
  -2  -3  11   71.13    7.15
  -2  -3  11   81.13    5.50
  -2  -3  11   81.42    4.73
  -2   3  11   84.47    5.54
  -2  -3  11   84.01    8.91
  -2   3  11   86.04    9.36
  -2  -3  11   92.67    5.59
   2  -3 -10   66.76    7.75
  -2  -3  10   65.57    6.39
  -2   3  10   62.71    4.63
  -2  -3  10   62.88    4.48
  -2  -3  10   69.03    4.74
  -2   3  10   61.77    8.07
  -2  -3  10   70.55    7.93
  -2  -3  10   67.63    4.43
   2  -3  -9   50.97    6.36
  -2  -3   9   47.23    5.35
  -2  -3   9   46.88    3.63
  -2   3   9   49.98    3.76
   2  -3  -9   43.49    3.37
  -2   3   9   45.66    6.52
  -2  -3   9   42.16    6.05
  -2  -3   9   46.35    3.37
  -2  -3   8  281.66   13.28
  -2   3   8  269.11   16.81
  -2  -3   8  293.26   16.79
   2  -3  -8  286.95   16.95
  -2  -3   7   19.41    2.10
  -2   3   7   21.41    1.88
   2  -3  -7   23.76    4.16
  -2   3   6  395.04   21.63
  -2  -3   6  426.99   21.77
  -2  -3   6  443.47   19.14
   2  -3  -6  413.73   21.98
  -2   3   5   12.91    2.70
  -2  -3   5   13.31    2.70
   2  -3  -5   12.39    2.60
  -2  -3   5   13.41    2.41
  -2   3   4  136.48    8.37
  -2  -3   4  143.20    8.43
   2  -3  -4  125.98    8.30
   2  -3  -3  681.08   31.10
  -2  -3   3  679.70   31.49
  -2   3   3  708.16   31.63
   2  -3  -2 2985.87  128.85
  -2   3   2 3149.65  129.31
   2  -3  -2 3008.67  128.85
  -2  -3   2 3087.78  129.16
  -2  -3   2 2927.66  128.01
   2  -3  -1  305.09   14.32
   2  -3  -1  313.47   14.31
  -2  -3   1  285.59   13.75
  -2  -3   0 9999.00  401.08
   2  -3   0 8909.38  401.72
   2   3   0 9343.93  401.75
   2   3   1   91.07    5.01
   2  -3   1   88.30    4.97
   2  -3   1   77.58    4.91
   2   3   1   87.23    5.00
   2   3   2   35.50    2.73
   2  -3   2   39.47    2.85
   2  -3   2   29.76    2.75
   2   3   2   34.56    2.88
   2   3   3  122.07    6.61
   2  -3   3  112.95    6.55
   2   3   4  353.69   17.13
   2  -3   4  362.06   17.16
   2   3   5 2167.67   92.48
   2  -3   5 2108.39   92.46
   2  -3   6  329.68   14.14
   2   3   6  322.81   16.34
   2  -3   6  322.62   16.39
   2  -3   6  329.85   14.03
   2   3   6  305.51   14.10
   2   3   6  312.29   14.08
   2  -3   6  299.89   14.05
   2  -3   7  151.13    7.12
   2   3   7  141.36    9.50
   2  -3   7  138.15    9.33
   2   3   7  142.81    7.10
   2  -3   7  147.14    6.98
   2  -3   7  141.75    7.06
   2   3   7  141.29    7.06
   2  -3   8   14.99    1.90
   2   3   8   10.35    1.82
   2   3   8   13.61    3.79
   2  -3   8   14.47    3.75
   2  -3   8   15.48    2.24
   2   3   8   12.98    2.07
   2   3   8   11.65    1.93
   2  -3   8   14.19    2.06
   2  -3   9  204.53   10.07
   2   3   9  210.57   10.13
   2   3   9  212.19   10.46
   2   3   9  206.15   13.41
   2  -3   9  199.33   13.27
   2  -3   9  208.09   10.47
   2   3   9  203.26   10.15
   2  -3   9  207.02    9.90
   2   3  10   19.58    2.81
   2   3  10   13.94    2.58
   2  -3  10   15.57    2.67
   2   3  10   17.73    5.02
   2  -3  10   17.15    4.72
   2  -3  10   15.51    2.89
   2  -3  10   17.19    2.46
   2   3  10   16.64    2.65
   2   3  11    3.06    2.56
   2  -3  11    7.47    2.25
   2  -3  11    6.02    2.39
   2   3  11    7.57    2.50
   2   3  11    7.00    4.52
   2  -3  11    5.10    4.14
   2  -3  11    7.75    2.65
  -2  -3 -11    7.99    5.59
  -2   3 -11    8.76    5.80
   2   3  12    6.27    2.62
   2  -3  12    7.15    2.19
   2  -3  12    6.26    2.64
   2  -3  12    7.62    2.73
   2   3  12    6.70    2.79
  -2   3 -12    3.09    5.62
  -2  -3 -12    8.37    5.62
   2   3  12    7.76    4.74
   2  -3  12    6.44    4.22
   2  -3  13   38.40    3.17
   2   3  13   32.95    3.45
   2  -3  13   35.41    2.65
   2   3  13   38.47    3.53
   2  -3  13   46.87    3.74
   2  -3  13   45.23    3.79
   2   3  14    6.16    2.18
   2  -3  14    8.79    2.17
   2   3  14    7.60    2.05
   2   3  15  104.93    5.57
   2   3  15  125.62    6.03
   2  -3  15  124.06    5.99
   2   3  15   92.66    5.65
  -2   4  15   -0.68    1.61
  -2  -4  15    0.46    1.49
  -2   4  15    0.46    1.64
   2  -4 -15    0.18    2.02
   2   4 -15   -1.16    1.90
  -2   4  14  131.57    7.17
   2   4 -14  128.54    7.70
  -2   4  13   53.75    4.04
  -2  -4  13   49.74    3.98
  -2  -4  12  101.13    5.88
  -2   4  12   95.21    5.88
  -2  -4  12   91.38    4.98
  -2  -4  12   76.43    8.80
  -2   4  12   82.46    9.01
  -2  -4  12   99.27    5.79
  -2  -4  12   84.43    7.53
   2  -4 -12   77.64    8.54
  -2  -4  11   19.43    2.78
  -2   4  11   15.54    2.79
  -2  -4  11   20.54    2.78
  -2  -4  11   25.99    4.79
  -2  -4  11   19.62    2.12
  -2   4  11   16.87    5.43
  -2  -4  11    9.39    4.74
   2  -4 -11   22.67    5.36
  -2   4  10    5.28    4.16
  -2  -4  10    5.71    4.27
  -2  -4  10    7.83    2.31
  -2   4  10    3.84    2.18
  -2  -4  10    7.74    1.66
   2  -4 -10    3.66    1.88
  -2  -4  10    1.75    2.07
  -2  -4  10    5.92    3.33
   2  -4 -10    6.75    4.25
  -2  -4   9   69.10    6.07
   2  -4  -9   79.06    8.02
   2  -4  -9   66.76    4.48
  -2  -4   9   64.01    6.97
  -2  -4   8  528.49   26.11
   2  -4  -8  555.33   28.61
  -2   4   8  567.64   27.96
  -2  -4   8  524.84   27.47
  -2  -4   7    9.32    2.81
  -2   4   7    9.01    1.77
   2  -4  -7   12.85    3.66
  -2   4   7   12.03    3.25
  -2  -4   7    8.45    3.51
  -2   4   6 1676.12   74.41
  -2  -4   6 1679.83   74.35
   2  -4  -6 1695.42   75.24
  -2  -4   6 1700.22   73.25
  -2   4   6 1604.68   71.70
  -2  -4   6 1745.88   71.78
  -2  -4   5  173.53   10.13
  -2   4   5  169.96   10.16
   2  -4  -5  168.71   10.68
  -2   4   5  165.04    8.26
  -2  -4   5  177.89    9.54
  -2  -4   5  176.21    8.29
  -2   4   4   79.18    5.63
  -2  -4   4   72.66    5.36
   2  -4  -4   73.23    5.43
  -2  -4   4   71.83    4.97
  -2   4   3   79.36    5.31
  -2  -4   3   73.21    5.08
   2  -4  -3   71.89    5.35
   2  -4  -3   67.79    5.29
   2  -4  -2  164.16    9.51
  -2  -4   2  176.31    9.24
  -2   4   2  181.41    9.45
   2  -4  -2  166.19    9.38
   2  -4  -1  838.55   37.64
  -2  -4   1  874.39   37.73
   2  -4  -1  829.85   37.50
  -2  -4   0   91.47    5.13
   2  -4   0   92.19    5.20
   2   4   0   87.82    5.13
   2   4   1  777.84   33.99
   2  -4   1  771.36   33.99
   2  -4   2 1545.94   64.92
   2   4   2 1472.15   64.77
   2   4   3  465.15   21.72
   2  -4   3  490.61   21.85
   2   4   4 2437.55  106.40
   2  -4   4 2528.06  106.44
   2   4   5  645.59   27.62
   2  -4   5  640.54   27.58
   2  -4   5  574.67   25.29
   2   4   6 1033.24   43.64
   2  -4   6 1007.11   43.61
   2  -4   6 1051.89   43.59
   2   4   6 1021.91   43.72
   2  -4   6 1075.62   43.75
   2   4   6 1060.28   46.04
   2  -4   6 1045.48   45.94
   2  -4   6  925.42   43.59
   2  -4   7    6.25    1.37
   2   4   7    1.50    2.50
   2  -4   7   -1.49    2.46
   2  -4   7    1.49    1.18
   2   4   7   -0.41    1.27
   2   4   7    0.55    1.27
   2  -4   7    0.55    1.24
   2   4   8  634.09   27.29
   2  -4   8  595.41   26.77
   2   4   8  607.47   26.80
   2  -4   8  634.79   26.70
   2   4   8  604.69   26.89
   2   4   8  615.11   29.95
   2  -4   8  626.40   29.99
  -2  -4  -8  567.07   27.16
   2  -4   8  630.87   27.23
   2  -4   8  607.87   26.88
   2   4   9    1.21    2.06
   2   4   9    2.88    1.87
   2  -4   9    0.44    1.66
  -2  -4  -9   -0.70    1.76
   2   4   9    4.58    3.63
   2  -4   9    0.51    3.63
   2   4   9    0.87    1.73
   2  -4   9    3.98    2.01
   2  -4   9    0.50    1.99
   2   4  10   76.70    5.21
   2  -4  10   80.47    4.83
   2   4  10   72.04    4.79
   2   4  10   75.78    7.70
   2  -4  10   75.31    7.76
   2  -4  10   72.40    5.12
   2  -4  10   75.62    4.62
   2   4  10   66.16    4.88
   2  -4  11   21.25    5.38
   2   4  11   24.30    5.18
   2  -4  11   25.42    2.65
  -2   4 -11   20.93    6.24
  -2  -4 -11   21.84    6.51
   2   4  11   20.45    2.85
   2  -4  11   24.88    3.07
   2   4  11   15.76    2.93
   2  -4  11   17.40    3.19
   2   4  12  207.96   10.54
   2  -4  12  207.41   10.06
  -2   4 -12  203.53   16.21
  -2  -4 -12  169.01   15.51
   2   4  12  193.41   13.94
   2  -4  12  213.18   14.22
   2  -4  12  211.87   10.38
   2  -4  12  202.26    9.55
   2   4  12  217.10   10.39
   2  -4  12  210.34   10.70
   2   4  13  126.99    6.77
   2  -4  13  124.75    6.78
   2  -4  13  127.73    7.03
   2   4  13  110.76    6.79
   2  -4  14   13.89    2.38
   2   4  14   12.56    2.36
   2   4  14   11.91    2.25
   2   4  15    4.96    1.71
   2  -4  15    6.25    1.66
   2   4  15    4.55    1.57
   2   4  15    5.63    1.67
   2   5 -15   37.46    3.05
   2  -5 -15   37.73    3.23
  -2  -5  15   38.66    2.60
  -2   5  15   43.57    2.71
  -2   5  15   36.38    2.88
   2  -5 -14   61.60    4.62
   2   5 -14   46.63    4.10
  -2   5  13  131.08    6.98
  -2  -5  13  129.93    6.97
  -2  -5  13  126.74    7.13
   2  -5 -12  130.91   12.23
  -2   5  12  157.85   11.99
  -2  -5  12  145.88   11.48
   2  -5 -12  143.63   12.10
  -2   5  12  158.91    8.20
  -2  -5  12  155.85    8.11
  -2  -5  12  144.64   10.03
  -2  -5  12  160.05    8.37
   2  -5 -11    6.63    4.53
  -2   5  11    6.46    4.24
  -2  -5  11    8.02    4.31
   2  -5 -11    6.13    4.16
  -2  -5  11   11.97    2.86
  -2  -5  11    8.89    3.66
  -2   5  11    8.19    2.42
  -2  -5  11    9.07    2.33
  -2   5  10  168.28   12.69
  -2  -5  10  181.47   12.56
  -2  -5  10  190.38    9.54
   2  -5 -10  184.37    9.63
  -2  -5  10  169.34   11.24
  -2   5  10  177.09    9.22
  -2  -5  10  186.44    9.26
   2  -5 -10  174.10   13.78
  -2   5   9  186.53    9.47
  -2  -5   9  193.78    9.48
  -2  -5   9  191.03   11.61
   2  -5  -9  214.95   14.61
   2  -5  -9  204.30   10.11
  -2   5   9  184.57    9.97
  -2  -5   9  179.13   12.70
  -2   5   9  200.79   13.10
  -2   5   8    2.28    1.95
   2  -5  -8    1.32    3.45
  -2   5   8    0.51    3.23
  -2  -5   8   -0.97    3.02
   2  -5  -8    1.45    1.73
  -2  -5   8    1.02    2.51
  -2  -5   7 1589.28   68.02
   2  -5  -7 1629.95   71.06
  -2   5   7 1502.32   66.33
  -2   5   7 1561.22   69.34
  -2  -5   7 1539.31   69.05
   2  -5  -6   42.79    5.22
  -2  -5   6   44.98    4.57
  -2   5   6   41.82    4.43
  -2  -5   6   47.02    4.21
  -2   5   6   35.33    2.94
  -2   5   5  326.29   16.65
  -2  -5   5  325.03   16.65
   2  -5  -5  340.49   17.31
  -2  -5   5  336.83   16.12
  -2   5   5  318.21   14.84
   2  -5  -4 1048.99   46.77
  -2  -5   4 1020.27   45.93
  -2   5   4 1068.80   46.11
   2  -5  -4  915.05   46.57
  -2  -5   4 1078.64   45.59
  -2  -5   3  134.76    7.76
  -2   5   3  142.69    7.88
   2  -5  -3  136.44    8.53
   2  -5  -3  130.16    8.43
  -2  -5   3  138.82    7.58
   2  -5  -2  171.60    9.80
  -2   5   2  173.65    9.16
  -2  -5   2  164.51    9.00
   2  -5  -2  183.20    9.82
   2  -5  -1 1730.26   74.93
  -2   5   1 1787.70   74.48
  -2  -5   1 1779.42   74.36
   2  -5  -1 1807.17   74.77
   2   5  -1 1680.97   74.25
   2  -5  -1 1604.71   74.16
  -2  -5   0 1710.76   68.81
   2  -5   0 1612.04   68.66
   2  -5   0 1577.07   68.25
   2   5   0 1514.74   68.21
  -2  -5  -1 1774.19   78.71
   2  -5   1 1833.94   78.30
   2   5   1 1871.49   78.35
   2   5   2  643.93   28.55
   2  -5   2  646.11   28.63
   2   5   3   25.50    2.42
   2  -5   3   24.20    2.56
   2   5   4  102.75    6.36
   2  -5   4  111.90    6.51
   2   5   5 1021.61   46.31
   2  -5   5 1046.60   46.32
   2  -5   5 1048.59   44.51
   2   5   6  759.74   33.80
   2  -5   6  713.35   33.64
  -2  -5  -6  734.09   31.75
   2  -5   6  728.61   31.63
   2   5   6  736.84   31.50
   2  -5   6  709.31   31.46
   2  -5   6  745.03   31.48
   2   5   7  222.73   10.82
   2  -5   7  250.27   10.74
   2  -5   7  237.35   10.89
   2   5   7  237.01   13.17
   2  -5   7  225.09   13.06
   2   5   7  229.19   10.63
   2  -5   7  225.46   10.69
   2   5   7  233.01   10.74
   2  -5   8   25.43    2.47
   2   5   8   15.41    3.77
   2  -5   8   26.86    4.36
   2  -5   8   23.09    2.35
   2   5   8   19.99    2.32
   2   5   8   23.54    2.70
  -2  -5  -8   23.85    2.70
   2   5   8   25.65    2.53
   2  -5   8   24.71    2.26
  -2  -5  -9  152.43    8.50
   2   5   9  171.56   11.10
   2  -5   9  159.02   10.88
   2  -5   9  160.21    8.28
   2  -5   9  162.31    8.54
   2   5   9  161.85    8.65
   2   5   9  159.33    8.03
   2  -5   9  162.70    8.05
   2   5   9  154.13    8.20
   2  -5   9  165.94    8.01
   2  -5  10   20.96    2.77
   2   5  10   18.82    2.68
   2   5  10   17.23    2.70
   2  -5  10   17.78    2.47
   2  -5  10   18.58    4.84
   2   5  10   17.97    4.49
   2  -5  10   21.63    3.08
   2   5  10   17.61    2.95
   2  -5  11  761.03   33.34
   2   5  11  746.43   32.80
   2  -5  11  764.20   32.85
   2   5  11  730.73   36.71
   2  -5  11  730.31   36.80
   2   5  11  698.62   32.96
   2  -5  11  771.65   32.71
  -2   5 -11  728.73   39.00
  -2  -5 -11  740.05   39.48
   2  -5  12   41.52    3.71
   2   5  12   29.51    3.39
   2   5  12   29.30    5.55
   2  -5  12   29.25    5.68
   2  -5  12   34.21    3.29
   2   5  12   38.02    3.37
   2  -5  13    4.77    2.47
   2   5  13    6.84    2.16
   2  -5  13    6.06    2.17
   2   5  13    5.77    2.21
   2   5  14   17.04    2.36
   2  -5  14   16.58    2.28
   2   5  14   13.45    2.27
   2  -5  15   34.30    2.37
   2   5  15   32.39    2.43
   2   5  15   33.43    2.36
   2   5  15   27.85    2.44
   2   6 -15   19.99    1.99
  -2   6  15   23.30    1.76
   2  -6 -14    7.71    2.42
   2   6 -14    8.10    2.16
  -2  -6  14   11.10    1.79
  -2   6  14   10.12    1.81
   2   6 -13   23.72    3.16
  -2  -6  13   31.81    3.16
  -2  -6  12  140.08    8.13
  -2   6  12  131.72   10.74
  -2  -6  12  116.56   10.15
  -2   6  12  160.10    7.76
  -2  -6  12  153.63    7.70
   2  -6 -12  141.36   11.96
   2  -6 -11   -0.73    3.76
  -2  -6  11    0.70    1.99
  -2   6  11    3.59    2.09
  -2  -6  11    3.64    3.15
  -2  -6  11    0.39    2.51
  -2   6  11    3.55    4.12
  -2  -6  11    2.81    3.57
  -2  -6  11    3.12    2.48
   2  -6 -11    2.61    4.09
  -2  -6  10   34.47    3.67
  -2  -6  10   35.12    3.70
   2  -6 -10   39.30    3.77
   2  -6 -10   42.88    6.24
  -2  -6  10   41.18    3.20
  -2   6  10   36.78    3.20
  -2   6  10   37.31    5.67
  -2  -6  10   33.97    5.57
  -2  -6  10   30.04    4.75
   2  -6 -10   34.89    6.77
   2  -6  -9  119.51    7.09
  -2   6   9  140.12    9.89
  -2  -6   9  128.60    9.48
   2  -6  -9  101.96    9.76
  -2  -6   9  128.90    6.46
  -2   6   9  126.08    6.50
  -2   6   9   96.66    6.76
   2  -6  -9  112.16   10.78
  -2  -6   9  120.51    7.04
  -2  -6   9  124.91    8.55
  -2   6   8   13.47    3.63
  -2  -6   8   11.52    3.43
   2  -6  -8    6.35    3.57
  -2   6   8   21.48    2.57
   2  -6  -8   16.44    2.50
  -2  -6   8   15.06    2.52
   2  -6  -8   14.92    4.73
  -2  -6   8   19.00    3.36
   2  -6  -7  166.01   12.00
  -2   6   7  153.78    8.36
  -2  -6   7  165.23    9.76
  -2  -6   7  163.38   10.48
  -2   6   7  167.50   10.68
   2  -6  -7  170.31    8.68
   2  -6  -7  162.11   11.35
  -2   6   6  430.64   19.40
   2  -6  -6  411.33   22.33
  -2   6   6  435.90   21.51
  -2  -6   6  428.26   21.33
  -2  -6   6  432.01   20.78
  -2  -6   5   20.32    3.04
  -2  -6   5   24.66    3.24
  -2   6   5   20.64    2.97
   2  -6  -5   17.51    3.82
  -2   6   5   19.05    2.01
  -2  -6   4  272.40   13.04
   2  -6  -4  276.17   14.64
  -2   6   4  244.84   12.98
  -2  -6   4  239.71   12.89
   2  -6  -4  247.49   14.21
  -2  -6   3  632.59   27.67
   2  -6  -3  651.04   29.07
   2  -6  -3  588.05   28.72
  -2   6   3  592.56   27.54
  -2  -6   3  581.41   27.45
   2  -6  -2   55.47    4.63
  -2  -6   2   53.05    3.75
   2  -6  -2   49.66    4.57
  -2   6   2   58.61    3.94
   2  -6  -1  817.45   37.86
   2   6  -1  860.87   37.94
   2  -6  -1  905.27   39.06
  -2   6   1  887.63   38.21
   2  -6  -1  867.11   39.23
  -2  -6   1  901.48   38.15
   2   6   0   51.52    3.26
   2  -6   0   48.34    3.20
   2  -6   0   51.90    3.71
  -2  -6   0   58.97    4.01
   2   6   1   42.70    2.93
  -2  -6  -1   38.04    3.51
   2   6   2  256.19   12.59
   2  -6   2  284.73   12.84
   2  -6   3  152.98    7.68
   2   6   3  132.35    7.40
   2   6   4  421.52   20.03
   2  -6   4  442.19   20.18
   2   6   5  151.57    8.08
   2  -6   5  139.64    7.94
   2  -6   5  133.29    6.45
  -2  -6  -5  126.93    6.65
   2   6   6  373.05   17.84
   2  -6   6  340.69   17.60
   2  -6   6  346.62   15.85
  -2  -6  -6  362.65   16.07
   2  -6   6  350.14   15.62
   2   6   6  357.57   15.65
   2   6   7    0.30    1.62
   2  -6   7   -0.35    2.48
   2   6   7   -2.14    2.26
   2  -6   7    0.95    1.32
   2   6   7    0.44    1.24
   2   6   7    0.42    1.36
  -2  -6  -7    5.13    1.53
   2  -6   7    0.89    1.30
  -2  -6  -7    0.95    1.73
   2  -6   7    1.82    1.34
   2  -6   7    0.80    1.53
   2   6   8  389.75   19.11
   2  -6   8  414.27   18.77
   2   6   8  403.63   21.27
   2  -6   8  429.60   21.50
   2  -6   8  416.12   18.52
   2   6   8  433.27   18.56
   2  -6   8  437.07   18.56
   2   6   8  410.11   18.73
   2  -6   8  418.49   19.05
  -2  -6  -8  423.55   19.31
   2   6   8  394.95   18.42
  -2  -6  -9    9.84    2.35
   2  -6   9   12.71    4.15
   2   6   9   12.75    3.96
   2  -6   9   15.05    2.12
   2   6   9    9.22    2.13
   2  -6   9   11.83    2.16
   2  -6   9   13.00    2.22
   2   6   9   13.37    2.20
   2   6   9   10.73    2.50
  -2   6 -10  146.35   12.08
  -2  -6 -10  128.06   12.10
   2   6  10  144.90    8.52
   2   6  10  154.84   10.82
   2  -6  10  157.43   10.98
   2   6  10  159.03    7.89
   2  -6  10  162.00    7.91
   2   6  10  151.16    8.10
   2  -6  11   64.57    4.52
   2   6  11   50.53    4.15
   2   6  11   52.34    6.28
   2  -6  11   52.72    6.25
  -2  -6 -11   41.56    7.15
   2   6  11   58.94    3.93
   2  -6  11   56.17    3.83
  -2  -6 -12   59.14    4.62
   2   6  12   50.28    4.16
   2  -6  12   56.24    4.44
   2  -6  12   53.34    3.94
   2   6  12   55.61    3.94
   2   6  13   52.31    3.95
   2  -6  13   56.33    4.24
   2  -6  13   58.81    3.85
   2   6  13   49.28    3.66
   2   6  14   30.50    2.86
   2  -6  14   36.94    2.74
   2   6  14   35.89    2.74
   2   6  15    1.30    1.31
  -2   7  14    1.64    1.29
  -2   7  14   -0.66    1.91
   2   7 -14    0.64    1.53
   2  -7 -13   49.58    3.53
   2  -7 -13   52.49    4.15
   2   7 -13   45.75    3.86
  -2  -7  13   49.62    3.91
  -2   7  12    8.38    1.96
  -2  -7  12    6.06    2.51
   2   7 -12    5.87    2.34
   2  -7 -11   34.00    6.79
   2  -7 -11   31.32    6.20
  -2   7  11   39.15    3.05
  -2  -7  11   35.78    3.03
  -2   7  11   34.21    5.39
  -2  -7  11   32.61    5.07
  -2  -7  11   33.31    3.59
  -2  -7  11   30.81    3.62
  -2  -7  11   23.29    4.40
   2  -7 -10    1.64    2.26
  -2   7  10    4.24    3.63
  -2  -7  10    0.51    3.32
   2  -7 -10   -3.55    4.62
   2  -7 -10    1.50    4.51
  -2   7  10    3.35    1.86
  -2  -7  10    0.38    1.66
  -2  -7  10    1.23    2.35
  -2  -7  10   -0.39    2.99
  -2  -7  10   -1.85    2.79
  -2   7   9    8.52    3.64
  -2  -7   9   15.32    3.89
   2  -7  -9    3.32    4.06
   2  -7  -9    4.25    4.27
  -2   7   9    5.32    2.48
  -2  -7   9    5.59    3.23
   2  -7  -9    6.85    2.40
  -2  -7   9    2.95    2.28
  -2  -7   9    5.77    1.78
  -2   7   9    5.34    1.74
  -2   7   8    4.10    2.78
  -2  -7   8    5.69    2.92
   2  -7  -8    0.75    3.54
  -2   7   8    3.16    1.45
  -2  -7   8    3.79    1.44
  -2   7   8    4.46    2.12
  -2  -7   8    3.44    2.99
  -2  -7   8    1.09    1.99
   2  -7  -8    3.94    3.63
   2  -7  -8    2.99    1.94
   2  -7  -7    7.30    4.21
  -2   7   7    5.99    2.05
   2  -7  -7    6.66    2.09
  -2   7   7    9.28    3.18
  -2  -7   7    5.43    2.87
  -2  -7   7    7.54    2.13
  -2  -7   7    7.60    2.77
  -2  -7   6  130.25    7.07
  -2  -7   6  135.12    8.25
  -2   7   6  104.68    7.97
  -2  -7   6  130.83    8.25
   2  -7  -6  122.85    9.71
  -2   7   6  130.85    6.77
   2  -7  -5  630.16   30.88
  -2  -7   5  650.40   28.81
  -2   7   5  614.11   27.19
  -2  -7   5  590.10   27.53
   2  -7  -5  603.43   30.76
  -2  -7   5  645.40   28.78
  -2  -7   4  160.61    8.89
   2  -7  -4  148.00   10.03
   2  -7  -4  136.98    9.87
  -2  -7   4  144.57    8.42
  -2   7   4  158.02    8.58
   2  -7  -3  120.54    8.17
  -2   7   3  117.65    6.68
  -2  -7   3  118.44    6.70
   2  -7  -3  108.28    7.98
   2  -7  -2  130.70    7.36
   2   7  -2  135.34    7.44
   2  -7  -2  138.87    8.74
  -2   7   2  148.02    7.50
  -2  -7   2  145.75    7.42
   2  -7  -2  140.87    8.69
   2  -7  -1   14.41    2.66
   2  -7  -1    8.38    1.30
   2   7  -1    9.07    1.32
   2  -7  -1   12.43    2.35
  -2   7   1   11.96    1.62
  -2  -7   1   12.59    1.57
  -2  -7   0    1.71    0.89
  -2  -7   0    3.08    1.43
  -2   7   0    1.44    0.97
   2   7   0    3.55    0.99
   2  -7   0    0.41    1.16
   2  -7   0    5.48    1.06
  -2  -7  -1  105.24    6.84
  -2  -7  -2  156.89    9.35
  -2  -7  -3  112.42    6.02
   2   7   3  120.47    6.48
   2  -7   3  128.04    6.66
  -2  -7  -4  460.98   21.54
   2  -7   4  525.98   22.59
   2   7   4  499.65   22.41
  -2  -7  -5  146.25    7.56
   2  -7   5  149.27    7.26
   2   7   5  162.08    8.72
   2  -7   5  163.61    8.74
   2   7   6   58.71    4.77
   2  -7   6   52.57    4.62
   2   7   6   52.73    3.07
   2  -7   6   53.35    3.03
  -2  -7  -6   55.34    3.62
   2  -7   6   52.43    3.31
   2   7   6   48.90    3.18
   2   7   7  611.35   29.41
   2   7   7  666.30   31.28
   2  -7   7  669.67   31.20
   2   7   7  660.15   28.79
   2  -7   7  686.18   28.79
   2   7   7  657.94   28.99
   2  -7   7  695.53   29.39
  -2  -7  -7  646.31   29.60
  -2  -7  -7  686.35   29.39
   2  -7   7  656.62   29.10
   2   7   8    0.88    1.97
   2   7   8    1.47    1.66
   2  -7   8    2.13    1.54
   2   7   8    2.26    1.63
   2   7   8   -0.11    1.42
  -2  -7  -8    2.15    1.69
   2  -7   8    1.34    1.63
   2   7   8    3.60    2.74
   2  -7   8    2.36    2.94
   2  -7   8    1.97    1.98
  -2  -7  -8    1.51    1.95
  -2  -7  -9  124.78    7.31
   2   7   9  130.42    9.15
   2  -7   9  124.37    9.05
   2  -7   9  131.55    6.53
   2   7   9  141.80    6.58
   2  -7   9  115.58    6.78
   2  -7   9  121.69    7.09
   2   7   9  121.37    6.74
  -2  -7  -9  121.70   10.56
  -2   7  -9  108.38    9.84
   2   7   9  112.34    7.18
   2   7  10   15.07    2.33
   2  -7  10   17.76    2.36
   2   7  10   11.22    2.46
   2   7  10   13.44    2.75
   2  -7  10   13.54    3.87
   2   7  10   13.50    4.02
  -2  -7 -10    7.60    4.17
  -2   7 -10    9.76    4.09
  -2  -7 -11  136.01   12.65
   2   7  11  172.70    8.81
   2   7  11  173.20    8.53
   2  -7  11  182.73    8.61
   2   7  11  166.37   11.56
   2  -7  11  169.18   11.56
  -2   7 -11  135.76   12.28
   2  -7  12   49.75    4.14
   2  -7  12   53.18    3.67
   2   7  12   48.88    3.56
   2   7  12   42.92    3.62
  -2  -7 -12   50.89    4.47
   2  -7  13   67.24    4.02
   2   7  13   64.26    4.02
  -2  -7 -13   61.38    4.49
   2   7  13   60.40    4.11
   2   7  14    0.54    1.64
   2   7  14    1.64    1.39
   2   7  14    1.16    1.53
  -2   8  14   91.18    5.14
  -2   8  13    0.08    1.39
   2  -8 -13    1.03    1.60
  -2  -8  13   -2.65    2.01
   2   8 -13    0.29    1.63
   2  -8 -12  159.60    8.95
   2   8 -12  165.11    8.89
  -2  -8  12  159.13    8.99
   2  -8 -12  186.16    8.84
   2  -8 -11    0.62    2.21
   2   8 -11    1.42    2.09
   2  -8 -11    0.77    4.51
  -2  -8  11    1.69    2.53
  -2   8  11    4.24    1.71
  -2  -8  11    4.34    1.73
  -2  -8  11   -1.39    2.42
   2  -8 -11    3.60    4.32
  -2  -8  10    6.86    2.48
  -2  -8  10    7.41    3.34
   2  -8 -10    8.16    5.46
   2  -8 -10   -0.78    4.31
  -2  -8  10   -0.86    3.00
  -2  -8  10    5.61    1.81
  -2   8  10    7.18    1.86
  -2  -8  10    5.78    2.99
   2  -8 -10    2.93    2.49
   2  -8  -9    2.17    2.34
  -2   8   9   -0.93    3.10
  -2  -8   9    0.89    2.89
   2  -8  -9    0.86    4.35
  -2  -8   9   -0.99    2.31
  -2  -8   9    0.38    2.99
  -2   8   9    0.93    2.37
   2  -8  -9   -0.76    4.09
  -2  -8   9    2.14    1.59
  -2   8   9    0.57    1.54
  -2   8   8  920.63   40.14
  -2  -8   8  944.36   40.14
   2  -8  -8  944.56   41.45
  -2  -8   8  947.35   42.67
   2  -8  -8  904.26   45.84
  -2  -8   8  867.78   40.88
  -2   8   8  947.25   40.89
  -2   8   8  936.93   43.22
  -2  -8   8  978.55   43.19
  -2  -8   7   51.43    3.07
  -2  -8   7   43.79    3.92
  -2  -8   7   45.72    4.99
   2  -8  -7   48.33    4.01
   2  -8  -7   40.95    6.33
  -2   8   7   47.60    5.05
  -2  -8   7   47.10    4.97
  -2   8   7   50.67    3.69
   2  -8  -6  303.77   17.58
  -2  -8   6  264.40   13.55
  -2  -8   6  281.47   14.72
   2  -8  -6  260.63   16.94
  -2   8   6  279.48   14.71
  -2  -8   6  273.09   14.53
   2  -8  -6  301.81   13.72
  -2   8   6  269.11   13.07
  -2  -8   5  950.34   46.13
  -2   8   5 1073.31   47.24
   2  -8  -5 1050.25   49.70
  -2  -8   5 1093.02   47.11
   2  -8  -5 1112.31   50.10
  -2   8   5 1108.20   45.77
   2  -8  -4  769.27   35.51
  -2  -8   4  795.57   32.96
   2  -8  -4  836.32   35.87
   2  -8  -3   54.78    5.54
  -2   8   3   60.68    4.08
  -2  -8   3   62.77    4.08
   2  -8  -3   60.90    5.55
  -2   8   2  348.38   15.11
   2  -8  -2  304.55   16.76
  -2  -8   2  356.48   15.04
   2  -8  -2  282.81   14.73
   2   8  -2  316.10   14.86
   2  -8  -2  372.43   17.26
  -2  -8   1  169.97    7.45
   2  -8  -1  167.89    9.20
  -2  -8   1  133.05    7.55
   2  -8  -1  145.84    7.21
   2  -8   0  953.22   42.83
   2  -8   0  999.07   41.72
  -2  -8   0  981.37   41.60
  -2  -8   0  907.65   42.95
  -2  -8   0  952.93   41.91
   2  -8   1   94.01    5.18
  -2  -8  -1   98.73    5.30
  -2  -8  -1  101.74    6.69
  -2  -8  -2  107.14    5.44
  -2  -8  -2  116.92    7.47
  -2  -8  -3  153.59    7.89
  -2  -8  -3  180.03   10.54
   2   8   4  478.79   21.60
   2  -8   4  505.67   21.82
  -2  -8  -4  443.04   20.96
  -2  -8  -4  474.44   23.99
   2   8   5   41.55    3.80
   2  -8   5   46.05    3.94
  -2  -8  -5   42.45    3.20
   2  -8   5   46.40    2.83
   2   8   6  998.40   46.49
   2   8   6 1067.39   46.01
   2   8   6 1068.57   47.83
   2  -8   6 1053.25   47.73
  -2  -8  -6 1070.36   46.74
   2  -8   6 1142.83   45.87
   2  -8   6 1121.62   46.41
   2  -8   6 1036.76   46.15
  -2  -8  -6 1041.31   46.53
   2   8   7  452.48   21.79
  -2  -8  -7  465.93   22.00
   2   8   7  492.71   23.40
   2  -8   7  490.24   23.33
   2  -8   7  504.94   21.10
   2   8   7  475.12   21.28
  -2  -8  -7  470.57   21.74
   2  -8   7  471.40   21.42
   2  -8   7  498.47   21.69
   2   8   8    1.98    1.96
  -2  -8  -8    2.89    3.37
   2   8   8    4.66    1.81
  -2  -8  -8    2.37    2.03
   2   8   8    6.84    3.18
   2  -8   8    4.09    2.82
   2   8   8    4.66    1.56
   2  -8   8    6.67    1.70
  -2  -8  -8    3.81    1.80
   2  -8   8    4.66    1.89
   2   8   8    5.29    1.84
   2  -8   8    4.41    2.09
   2   8   9   91.37    7.68
   2  -8   9   94.37    7.84
   2   8   9  107.23    5.48
   2  -8   9  105.54    5.52
   2   8   9  101.92    5.70
   2   8   9   92.47    5.46
  -2  -8  -9   84.10    8.72
   2  -8   9  105.49    6.16
  -2  -8  -9  102.89    6.04
   2  -8   9   97.53    5.83
   2   8   9  104.06    6.30
   2   8  10  239.90   12.85
  -2  -8 -10  244.88   16.87
   2  -8  10  231.61   14.70
   2   8  10  272.90   12.14
   2  -8  10  284.53   12.21
   2   8  10  249.98   12.35
   2  -8  10  248.48   12.66
   2  -8  11   63.71    4.05
   2   8  11   62.94    3.99
   2   8  11   63.03    4.35
   2  -8  11   54.67    4.64
  -2  -8 -12   34.48    3.91
   2   8  12   42.45    3.12
   2  -8  12   45.12    3.23
   2   8  12   38.49    3.33
  -2  -8 -13   31.10    3.19
   2   8  13   28.75    2.62
   2   8  14   12.40    1.65
   2   8  14   10.70    1.72
  -2   9  14    2.73    1.44
  -2  -9  13   50.36    3.80
   2  -9 -13   49.01    3.39
   2  -9 -12   19.70    2.65
  -2  -9  12   20.42    2.99
   2  -9 -11    2.95    4.07
  -2  -9  11    7.85    2.43
  -2  -9  11    8.14    2.71
   2  -9 -10    1.74    2.70
   2  -9 -10   -2.06    1.98
  -2  -9  10    0.83    1.49
   2  -9 -10   -0.78    4.40
   2  -9 -10   -2.72    4.72
  -2  -9  10   -1.51    2.73
  -2  -9  10    2.68    2.31
  -2   9   9   10.93    2.76
   2  -9  -9   12.44    3.03
   2  -9  -9    6.27    4.62
  -2  -9   9    8.07    2.52
  -2  -9   9    8.31    1.70
   2  -9  -8   43.16    7.31
  -2  -9   8   55.71    4.29
  -2   9   8   52.64    4.27
   2  -9  -8   60.16    4.79
   2  -9  -7  630.41   31.87
  -2  -9   7  597.61   27.85
   2  -9  -7  581.79   31.26
  -2  -9   7  523.71   26.72
  -2   9   7  612.42   26.30
   2  -9  -7  605.08   27.02
  -2  -9   6   -0.28    1.95
  -2  -9   6   -1.05    1.83
   2  -9  -6   -1.29    3.70
  -2   9   6   -0.14    1.63
   2  -9  -6   -4.59    3.66
   2  -9  -5  502.83   25.13
  -2  -9   5  410.68   21.27
  -2  -9   5  475.81   21.72
   2  -9  -5  491.50   24.98
  -2   9   5  482.27   20.80
   2  -9  -5  463.04   21.37
   2  -9  -4  198.09   12.95
  -2   9   4  242.31   10.17
   2  -9  -4  251.56   13.91
   2   9  -3   40.10    2.64
  -2  -9   3   36.88    3.20
   2  -9  -3   49.80    5.10
   2  -9  -3   42.21    5.03
   2   9  -2   19.96    1.79
   2  -9  -2   18.00    3.19
   2  -9  -1  630.27   28.97
   2  -9  -1  612.23   26.87
   2  -9   0  668.54   31.29
  -2  -9   0  669.09   30.53
   2  -9   0  694.67   30.03
   2  -9   0  724.26   30.28
  -2  -9  -1  249.56   11.91
   2  -9   1  254.35   11.77
  -2  -9  -1  241.40   13.30
  -2  -9  -2   39.38    3.15
  -2  -9  -2   36.42    4.38
   2  -9   2   48.85    3.28
  -2  -9  -3   26.31    2.41
  -2  -9  -3   24.50    4.08
   2  -9   4    9.67    1.24
  -2  -9  -4    8.87    1.74
  -2  -9  -4    6.37    3.25
   2  -9   5  153.31    8.38
  -2  -9  -5  163.62   11.36
  -2  -9  -5  150.18    7.77
   2  -9   5  145.52    7.20
   2  -9   6    7.28    2.33
   2  -9   6    5.95    1.84
   2   9   6    6.72    1.87
  -2  -9  -6    4.79    1.98
  -2  -9  -6    5.54    3.88
  -2  -9  -6   10.47    1.93
   2  -9   6   10.90    1.69
   2   9   6    8.17    1.51
   2  -9   7   17.03    2.47
   2  -9   7   20.83    3.31
   2   9   7   18.44    2.07
   2   9   7   20.66    2.59
  -2  -9  -7   14.60    2.60
  -2  -9  -7   19.53    3.82
  -2  -9  -7   16.53    2.49
   2  -9   7   17.54    2.21
  -2  -9  -8    8.43    2.48
   2  -9   8    8.34    2.19
   2   9   8    6.93    1.92
  -2  -9  -8    7.60    3.32
   2   9   8    7.01    1.98
  -2  -9  -8    7.07    2.17
   2  -9   8    7.33    2.13
   2   9   8   11.18    2.54
   2  -9   9   67.50    3.88
   2   9   9   53.07    3.93
   2  -9   9   58.96    4.21
  -2  -9  -9   57.55    4.31
   2   9   9   60.38    4.52
   2   9   9   57.79    4.00
   2  -9   9   63.09    4.40
   2   9  10    3.23    2.14
   2  -9  10    4.57    1.88
   2  -9  10    4.49    2.27
  -2  -9 -10    4.16    5.01
   2   9  10    4.37    2.43
   2  -9  11  219.30   10.54
   2   9  11  199.25   10.04
  -2  -9 -12   97.72    6.07
   2   9  12   86.10    5.02
  -2  -9 -13    2.62    1.96
   2   9  13    5.45    1.76
   2   9  13    7.42    1.65
   2   9  14    2.46    1.29
   2   9  14    1.75    1.11
  -2  10  14   25.59    2.02
  -2  10  13   33.85    2.76
  -2 -10  13   32.45    2.91
   2 -10 -13   31.27    2.56
   2 -10 -12   19.86    2.44
  -2 -10  12   12.82    2.60
   2 -10 -11  265.92   12.72
  -2 -10  11  249.42   12.45
   2 -10 -10   71.06    5.56
  -2 -10  10   69.17    4.93
   2 -10 -10   71.17    8.27
   2 -10 -10   77.02    5.24
  -2 -10   9   18.86    2.91
   2 -10  -9   20.60    3.41
   2 -10  -9   16.54    5.47
   2 -10  -9   19.95    5.75
  -2 -10   8   14.41    2.54
  -2  10   8   10.94    2.42
   2 -10  -8    9.53    2.80
   2 -10  -8   14.05    5.05
   2 -10  -8    1.52    4.27
   2 -10  -7  106.79   10.26
   2 -10  -7  106.37    7.03
  -2 -10   7  111.24    7.03
   2 -10  -7  124.54   10.83
  -2  10   7  118.75    6.40
  -2  10   6  353.78   16.61
  -2 -10   6  360.18   17.38
   2 -10  -6  369.56   21.14
   2 -10  -6  360.08   21.08
   2 -10  -6  369.39   17.16
   2 -10  -5    2.43    3.70
  -2 -10   5    3.73    1.88
   2 -10  -5    4.67    3.52
   2 -10  -5    3.92    1.86
  -2  10   5    2.57    1.55
   2 -10  -5    4.29    1.80
   2 -10  -4  441.27   23.94
   2 -10  -4  506.35   24.61
   2 -10  -4  469.85   21.16
   2 -10  -4  470.21   21.08
  -2  10   4  472.74   20.40
   2 -10  -3  100.39    7.63
   2  10  -3   95.80    4.90
   2 -10  -3   78.95    7.24
  -2 -10   3   85.78    5.64
   2  10  -2   43.22    3.06
   2 -10  -2   53.68    3.34
  -2 -10   2   51.29    3.77
   2 -10  -2   54.81    5.19
   2 -10  -1  130.86    8.56
   2 -10  -1  144.74    7.08
  -2 -10   0  535.52   24.39
   2 -10   0  536.37   23.80
   2 -10   0  554.93   24.03
   2 -10   1   56.27    3.29
  -2 -10  -1   54.98    3.80
   2 -10   1   48.16    3.09
   2 -10   1   56.15    3.66
  -2 -10  -1   43.48    4.50
  -2 -10  -2  208.94   10.04
   2 -10   2  193.39    9.86
  -2 -10  -2  191.97   11.77
  -2 -10  -3  365.89   16.61
  -2 -10  -3  324.48   19.09
  -2 -10  -4   75.05    4.86
  -2 -10  -4   79.69    4.83
  -2 -10  -4   89.64    8.14
   2 -10   5   53.47    3.26
  -2 -10  -5   42.48    3.55
   2 -10   5   43.32    2.94
   2  10   5   52.75    3.54
  -2 -10  -5   46.60    3.65
  -2 -10  -5   40.12    6.40
  -2 -10  -6  700.85   31.70
   2 -10   6  686.65   31.09
  -2 -10  -6  725.34   36.77
   2  10   6  716.64   31.54
   2 -10   6  751.45   31.31
   2 -10   7  209.28    9.74
   2  10   7  205.91    9.97
  -2 -10  -7  180.48    9.96
   2 -10   7  191.90    9.50
  -2 -10  -7  210.04   14.62
  -2 -10  -7  183.02   10.19
  -2 -10  -8   21.47    3.15
   2 -10   8   25.81    2.63
  -2 -10  -8   23.45    2.92
   2  10   8   25.28    3.10
  -2 -10  -8   20.75    5.84
   2  10   8   23.63    2.80
   2  10   8   25.55    2.44
   2 -10   8   34.92    3.04
  -2 -10  -9  156.02    8.39
   2 -10   9  155.12    8.01
   2  10   9  152.54    8.42
  -2 -10  -9  162.08   13.34
   2  10   9  159.19    7.77
   2  10   9  145.35    7.96
   2 -10   9  157.76    8.22
   2 -10  10  153.36    8.20
   2  10  10  158.93    7.86
   2  10  10  159.62    8.53
  -2 -10 -10  147.08   13.22
   2 -10  11    4.08    2.27
   2  10  11    3.94    1.85
  -2 -10 -11    5.56    2.55
  -2 -10 -12    5.79    2.06
   2  10  12    6.24    1.58
  -2 -10 -12    3.71    2.34
   2  10  12    3.32    1.85
   2  10  13    1.52    1.23
   2  10  13    1.44    1.41
  -2 -10 -13    1.60    1.82
   2 -11 -13   27.12    2.25
  -2  11  13   24.57    2.14
   2 -11 -12   39.77    3.25
  -2 -11  11  212.30   10.42
   2 -11 -11  216.88   10.84
   2 -11 -10   41.82    6.72
   2 -11 -10   48.68    4.17
   2 -11 -10   50.17    4.59
  -2 -11  10   43.86    3.62
   2 -11  -9   91.63    5.90
   2 -11  -9   86.89    6.10
   2 -11  -9   68.19    8.47
   2 -11  -9   81.35    9.42
  -2 -11   9   82.40    5.28
   2 -11  -8    9.33    2.88
  -2  11   8   10.06    2.42
   2 -11  -8    2.94    4.18
  -2 -11   8    9.26    2.28
   2 -11  -8    2.46    4.22
   2 -11  -7    1.53    4.04
   2 -11  -7    2.15    4.00
  -2  11   7    7.37    2.07
  -2 -11   7    6.81    2.14
  -2 -11   7    2.29    2.46
  -2 -11   6  153.58    8.20
   2 -11  -6  134.33   11.15
   2 -11  -6  130.55    7.80
  -2  11   6  141.12    7.19
   2 -11  -6  130.08    7.96
   2 -11  -6  120.04   10.64
  -2 -11   5 1107.61   45.52
   2 -11  -5 1002.37   45.29
   2 -11  -5 1001.98   49.07
   2 -11  -5 1018.71   45.37
  -2  11   5 1035.25   44.47
   2 -11  -5  931.96   48.55
   2 -11  -4   18.42    2.46
   2 -11  -4   14.81    2.50
   2 -11  -4   18.16    2.31
   2 -11  -4   17.00    3.94
   2 -11  -4   14.51    3.78
  -2 -11   4   13.88    2.87
  -2  11   4   14.00    1.97
   2 -11  -3   13.67    3.27
   2 -11  -3   14.55    2.36
   2 -11  -3   13.94    2.15
  -2  11   3   13.35    1.79
  -2 -11   3   14.07    2.51
   2  11  -3   10.53    1.71
   2 -11  -3   13.44    2.16
  -2 -11   2  100.44    6.10
   2  11  -2   98.93    5.33
   2 -11  -2   93.99    5.48
   2 -11  -2  103.94    7.66
   2 -11  -2  103.09    6.11
   2 -11  -1  100.26    5.70
   2 -11  -1  103.37    7.13
   2 -11  -1  118.94    6.51
   2 -11  -1  104.53    5.70
   2 -11   0   18.29    1.95
   2 -11   0   19.25    2.56
   2 -11   0   17.31    1.91
   2 -11   0   17.46    2.16
   2 -11   1  873.49   37.38
  -2 -11  -1  889.61   37.99
   2 -11   1  858.47   37.64
   2 -11   1  807.62   37.22
   2 -11   1  921.15   38.29
  -2 -11  -2   54.69    4.07
   2 -11   2   49.15    3.92
  -2 -11  -2   57.43    5.65
   2 -11   2   56.40    4.14
   2 -11   3   24.10    2.67
  -2 -11  -3   17.83    2.55
  -2 -11  -3   18.17    2.23
  -2 -11  -3   15.44    4.02
   2 -11   4   -1.56    1.82
  -2 -11  -4   -0.32    1.80
  -2 -11  -4   -0.60    3.77
   2  11   4    0.37    1.57
  -2 -11  -5    6.57    2.03
   2 -11   5    6.18    1.61
  -2 -11  -5    5.27    2.19
   2  11   5    1.80    1.67
   2 -11   6  310.64   13.90
  -2 -11  -6  312.57   19.37
  -2 -11  -6  296.45   14.43
   2 -11   6  296.48   13.73
   2  11   6  294.48   14.17
  -2 -11  -7   23.46    3.05
   2 -11   7   25.04    2.48
   2  11   7   27.65    3.01
   2 -11   7   28.43    2.78
  -2 -11  -7   19.13    3.16
  -2 -11  -7   26.51    6.19
   2  11   8   54.55    4.15
   2  11   8   52.24    4.05
   2 -11   8   51.28    3.67
   2 -11   8   57.82    3.93
   2  11   9  145.05    8.05
  -2 -11  -9  126.08   12.31
   2 -11   9  149.66    7.67
   2  11   9  144.95    7.79
   2 -11   9  156.69    7.88
   2 -11  10   41.92    3.55
   2  11  10   41.11    3.68
   2  11  10   40.94    2.95
   2  11  11   42.36    3.08
  -2 -11 -11   47.12    3.80
  -2 -11 -11   41.78    3.95
   2  11  11   37.73    2.77
  -2 -11 -12   16.25    2.64
  -2 -11 -12   20.17    2.30
   2  11  12   18.96    2.01
   2  11  13   16.52    1.66
  -2 -11 -13   19.06    2.17
  -2  12  13    0.86    0.99
   2 -12 -12    2.87    1.69
  -2 -12  12    6.55    1.84
  -2 -12  11    1.82    2.13
   2 -12 -11    3.21    2.14
  -2 -12  10   45.34    3.89
  -2 -12  10   38.09    3.22
   2 -12 -10   38.87    4.13
   2 -12 -10   46.62    4.00
   2 -12  -9   92.16    8.93
  -2 -12   9   82.38    5.10
   2 -12  -9   84.01    5.93
   2 -12  -9   93.70    5.86
   2 -12  -8   11.95    4.75
   2 -12  -8   11.92    4.75
   2 -12  -8   10.89    2.92
  -2 -12   8   12.54    2.31
   2 -12  -7  103.46    6.90
  -2  12   7  116.04    6.17
   2 -12  -7  109.94    6.74
   2 -12  -7  107.67   10.40
  -2 -12   7  112.70    7.01
   2 -12  -7  113.64    6.84
  -2 -12   7  109.05    6.29
   2 -12  -7  107.33    9.98
  -2 -12   6  268.03   12.87
   2 -12  -6  260.00   12.93
   2 -12  -6  244.02   12.79
   2 -12  -6  237.83   16.22
  -2  12   6  244.96   11.89
   2 -12  -6  242.88   16.05
   2 -12  -5   10.78    2.38
   2 -12  -5   20.36    2.97
  -2 -12   5   11.47    2.72
   2 -12  -5   10.42    4.15
   2 -12  -5    8.50    2.45
   2 -12  -5   12.77    4.20
  -2  12   5    8.23    1.85
  -2  12   4   54.94    3.57
  -2 -12   4   59.79    4.40
   2 -12  -4   55.00    4.07
   2 -12  -4   48.42    4.10
  -2 -12   4   60.62    4.90
   2 -12  -4   54.98    4.53
   2 -12  -4   57.82    6.61
   2 -12  -3    5.49    2.80
   2 -12  -3    3.64    1.91
   2 -12  -3    3.53    2.09
   2  12  -3    4.61    1.60
   2 -12  -3    4.54    2.01
  -2 -12   3    6.43    2.49
  -2  12   3    4.20    1.50
   2 -12  -2   64.40    4.24
   2  12  -2   62.44    3.95
  -2 -12   2   72.65    4.87
   2 -12  -2   66.99    4.25
   2 -12  -2   58.85    5.65
   2 -12  -2   64.94    4.79
   2 -12  -2   61.63    4.26
   2 -12  -1   94.65    5.51
  -2 -12   1   93.70    6.16
   2 -12  -1  106.93    6.37
   2 -12  -1  101.22    5.59
   2 -12   0   98.96    5.60
   2 -12   0  102.53    5.48
   2 -12   0  100.26    6.28
   2 -12   0   95.57    5.42
  -2 -12  -1  126.69    7.33
   2 -12   1  128.65    6.76
   2 -12   1  130.29    7.07
   2 -12   1  139.95    7.70
  -2 -12  -1  130.61    6.77
  -2 -12  -2   29.40    3.12
   2 -12   2   24.09    2.84
   2 -12   2   31.52    3.30
  -2 -12  -2   23.65    2.44
  -2 -12  -2   22.11    4.13
   2  12   3  291.57   13.67
  -2 -12  -3  293.95   14.08
  -2 -12  -3  312.06   14.58
   2 -12   3  311.32   14.74
  -2 -12  -3  277.62   16.84
   2  12   4  137.81    7.01
  -2 -12  -4  126.18    7.36
  -2 -12  -4  136.87    7.78
   2 -12   4  138.01    7.76
  -2 -12  -4  138.89   10.49
   2  12   5   47.22    3.52
  -2 -12  -5   49.57    4.04
  -2 -12  -5   53.45    4.30
   2 -12   5   42.89    3.78
  -2 -12  -5   49.67    6.83
  -2 -12  -6  587.98   27.82
  -2 -12  -6  585.92   32.57
   2 -12   6  623.63   27.04
   2  12   6  631.82   27.42
   2 -12   7  155.49    7.71
   2  12   7  143.97    7.95
  -2 -12  -7  127.12   11.97
   2  12   7  154.37    7.39
   2 -12   7  149.39    7.46
   2  12   8   38.08    3.36
   2 -12   8   32.72    2.85
   2  12   8   34.25    3.37
   2 -12   8   43.81    3.33
  -2 -12  -8   25.82    6.47
   2  12   9    0.60    1.96
   2  12   9   -0.30    2.10
   2  12   9    2.54    1.82
  -2 -12  -9    4.01    4.55
   2  12  10  269.53   12.41
  -2 -12 -10  275.87   13.45
  -2 -12 -11   25.18    3.25
   2  12  11   30.15    2.42
  -2 -12 -11   32.71    3.07
  -2 -12 -12   36.36    3.16
   2  12  12   32.56    2.32
  -2 -12 -12   35.77    2.71
  -2  13  12    0.58    1.06
   2 -13 -12    2.59    1.44
  -2 -13  12    2.67    1.35
   2 -13 -11    3.06    1.90
  -2 -13  11    3.74    1.74
  -2 -13  10   71.36    4.23
   2 -13 -10   76.23    5.03
  -2 -13  10   75.88    4.78
   2 -13  -9   42.75    3.84
   2 -13  -9   37.17    3.88
  -2 -13   9   36.38    2.94
   2 -13  -8   30.84    5.82
   2 -13  -8   33.85    3.72
  -2 -13   8   24.30    2.58
   2 -13  -8   24.30    5.18
   2 -13  -7  149.65    8.94
  -2  13   7  166.73    8.11
   2 -13  -7  123.27   11.60
   2 -13  -7  149.40    8.74
  -2 -13   7  177.67    8.97
   2 -13  -7  164.10    8.91
  -2 -13   7  164.61    8.14
   2 -13  -7  136.09   11.66
  -2 -13   6   97.15    5.99
   2 -13  -6   93.00    6.08
   2 -13  -6   85.45    5.99
  -2  13   6   89.42    5.10
   2 -13  -6   96.60    9.00
   2 -13  -5    2.55    3.37
   2 -13  -5    3.88    2.46
  -2 -13   5    4.23    2.18
   2 -13  -5    4.92    3.83
   2 -13  -5    5.06    2.52
   2 -13  -5    5.18    2.29
  -2  13   5    3.75    1.69
   2 -13  -4   -0.20    1.91
   2 -13  -4    1.08    2.09
  -2 -13   4    2.12    2.15
  -2 -13   4   -1.25    2.83
   2 -13  -4    1.20    2.34
   2 -13  -4   -1.15    3.08
   2  13  -3   32.61    2.79
   2 -13  -3   36.38    3.32
  -2 -13   3   44.07    4.05
   2 -13  -3   35.75    3.34
   2 -13  -3   28.22    4.46
   2 -13  -3   33.75    3.77
   2 -13  -2    9.06    2.18
  -2 -13   2   11.77    2.67
   2 -13  -2   12.64    2.53
   2 -13  -2    9.53    2.20
   2  13  -2   12.60    2.01
   2 -13  -2    8.09    1.88
   2 -13  -1  274.81   13.49
  -2 -13   1  302.86   14.17
   2 -13  -1  273.52   13.44
   2 -13  -1  292.34   13.53
  -2 -13   1  286.69   14.19
   2 -13  -1  285.23   14.33
   2 -13   0    1.67    1.50
   2 -13   0    2.64    1.65
   2 -13   0    2.08    2.00
   2 -13   1   14.07    2.09
   2 -13   1   21.11    2.74
   2 -13   1   21.14    3.05
  -2 -13  -1   15.58    2.07
  -2 -13  -2    1.23    2.19
   2 -13   2   -0.23    2.15
  -2 -13  -2   -1.06    1.58
  -2 -13  -3   10.52    2.27
   2 -13   3    5.77    2.39
  -2 -13  -3   13.02    2.66
  -2 -13  -3   13.56    3.58
  -2 -13  -4  126.59    7.63
   2 -13   4  139.67    7.77
  -2 -13  -4  124.44    7.21
  -2 -13  -4  121.22    9.84
  -2 -13  -5  278.22   17.30
   2  13   5  281.71   13.04
  -2 -13  -5  253.46   13.42
  -2 -13  -5  285.01   13.87
   2 -13   5  281.87   13.72
  -2 -13  -6  269.94   17.88
  -2 -13  -6  293.84   14.41
   2  13   6  287.64   13.56
   2  13   7   89.45    5.71
  -2 -13  -7   99.08    6.33
   2  13   7   98.45    5.57
  -2 -13  -8   46.49    6.87
  -2 -13  -8   43.55    4.29
   2  13   8   50.95    3.70
   2  13   8   44.55    3.73
   2  13   9    8.49    1.79
   2  13   9    5.03    2.02
  -2 -13  -9    8.55    2.70
   2  13   9    7.99    2.13
   2  13  10   29.33    2.35
  -2 -13 -10   26.93    3.16
  -2 -13 -10   28.42    3.51
   2  13  11   64.88    3.56
  -2 -13 -11   69.07    4.70
  -2 -13 -11   66.72    4.30
  -2 -13 -12   12.16    1.96
   2 -14 -11   37.26    2.97
  -2 -14  11   33.62    2.62
   2 -14 -10   76.80    4.72
  -2 -14  10   61.51    4.19
  -2 -14   9   14.19    2.45
   2 -14  -9   17.04    2.72
  -2 -14   8  147.72    7.55
   2 -14  -8  154.18    8.64
   2 -14  -8  163.58    8.61
  -2 -14   7  125.62    6.42
   2 -14  -7  107.96    9.92
   2 -14  -7  115.29    7.39
   2 -14  -7  131.17   10.82
   2 -14  -7  126.32    7.34
   2 -14  -6  147.10    8.34
  -2 -14   6  150.71    7.90
   2 -14  -6  137.07    8.11
  -2 -14   6  137.73    7.15
   2 -14  -5  127.59    7.48
   2 -14  -5  131.42    7.67
   2 -14  -5  113.00   10.03
   2 -14  -5  128.87    7.99
  -2 -14   5  140.65    7.62
  -2 -14   4  117.95    7.32
   2 -14  -4  109.36    6.67
  -2 -14   4  114.03    6.64
   2 -14  -4  114.73    7.28
   2 -14  -4  101.77    6.59
   2 -14  -3   88.34    5.63
  -2 -14   3   98.18    6.24
   2 -14  -3   83.48    5.45
   2  14  -3   81.74    4.93
   2 -14  -3   85.11    5.49
   2 -14  -3   85.77    6.11
   2 -14  -2   74.56    5.06
  -2 -14   2   73.64    5.63
   2 -14  -2   75.70    5.69
   2  14  -2   76.85    4.67
   2 -14  -2   80.96    5.08
   2 -14  -2   77.80    5.09
   2 -14  -1  122.59    6.97
  -2 -14   1  137.08    7.76
   2 -14  -1  127.77    6.94
   2 -14  -1  116.05    6.89
   2  14  -1  126.50    6.90
   2 -14  -1  140.15    7.94
   2 -14   0   99.47    5.78
  -2 -14   0   94.96    6.56
   2 -14   0  110.85    6.17
   2 -14   1   16.86    2.19
   2 -14   1   16.62    2.99
   2 -14   1   14.50    2.73
  -2 -14  -2  198.87   10.72
   2 -14   2  203.40   10.93
  -2 -14  -3   68.28    5.33
   2 -14   3   74.49    5.43
  -2 -14  -4  296.24   14.55
   2 -14   4  282.76   14.51
  -2 -14  -4  301.34   17.29
  -2 -14  -5  123.71    7.35
   2 -14   5  114.70    7.01
  -2 -14  -5  116.33    9.81
  -2 -14  -6   94.12    9.19
  -2 -14  -6  112.28    6.99
  -2 -14  -7   61.98    7.70
   2  14   7   75.59    4.98
  -2 -14  -7   76.88    5.56
   2  14   8  300.59   13.92
   2  14   8  303.19   14.30
  -2 -14  -8  302.95   14.82
  -2 -14  -9   17.00    3.10
   2  14   9   14.48    2.26
  -2 -14  -9   17.92    2.96
  -2 -14 -10   82.93    5.29
  -2 -14 -10   71.87    4.92
  -2 -14 -11   -1.32    1.80
  -2 -14 -11    0.48    1.57
   2 -15 -11   53.42    3.43
  -2 -15  11   51.20    3.06
   2 -15 -11   59.96    3.40
  -2 -15  10   -0.48    1.34
   2 -15 -10    1.40    1.82
  -2 -15   9   10.11    1.90
   2 -15  -9   10.43    2.41
   2 -15  -8   15.12    2.81
   2 -15  -7   35.55    3.77
   2 -15  -7   37.77    3.54
   2 -15  -6    0.58    2.39
   2 -15  -6    3.31    2.33
   2 -15  -6    0.47    2.44
  -2 -15   6   -0.50    2.06
   2 -15  -5   93.94    5.95
   2 -15  -5   81.55    6.10
   2 -15  -5   84.18    5.73
   2 -15  -5   93.87    5.89
  -2 -15   5   87.72    5.56
  -2 -15   4    5.46    2.06
   2 -15  -4    1.35    2.37
   2 -15  -4    7.66    2.59
   2 -15  -4   -0.20    2.13
   2 -15  -4    3.06    2.73
   2 -15  -4    5.81    2.52
   2 -15  -3  119.08    7.64
  -2 -15   3  126.49    6.96
   2 -15  -3  122.75    7.12
  -2 -15   3  122.76    7.60
   2 -15  -3  115.35    6.95
   2 -15  -3  122.74    7.11
   2 -15  -2    3.11    2.17
  -2 -15   2   11.95    3.14
   2  15  -2    7.26    1.96
   2 -15  -2    5.75    2.35
   2 -15  -2    4.39    2.26
   2 -15  -2    5.41    2.82
   2 -15  -1    5.09    2.26
  -2 -15   1    8.37    2.83
   2 -15  -1    2.29    1.91
   2 -15  -1    6.74    2.92
   2  15  -1    5.03    2.11
   2  15   0   18.80    2.71
  -2 -15   0   19.12    3.20
   2 -15   0   17.95    2.41
   2 -15   0   16.85    2.87
  -2 -15   0   16.66    3.19
   2 -15   1   29.58    3.94
   2 -15   2  105.95    6.98
   2 -15   3  184.28   10.23
  -2 -15  -3  183.92   10.13
   2 -15   4    8.31    2.54
  -2 -15  -4    8.62    2.87
   2 -15   5   12.97    2.48
  -2 -15  -5    9.17    3.04
  -2 -15  -6    0.22    2.57
   2  15   6    3.65    2.49
  -2 -15  -6   -1.13    3.12
  -2 -15  -7  140.06    8.31
  -2 -15  -7  149.60    7.94
   2  15   7  147.92    7.86
   2  15   8   36.09    3.16
  -2 -15  -8   37.87    3.83
  -2 -15  -8   35.92    3.68
   2  15   9   89.69    5.00
  -2 -15  -9   87.01    5.55
  -2 -15 -10    5.49    2.06
  -2 -15 -10    4.02    1.87
  -2 -15 -11   24.17    2.34
   2 -16 -10    5.95    1.50
   2 -16 -10    2.69    1.53
  -2 -16  10    3.81    1.17
   2 -16  -9    3.10    1.67
   2 -16  -9    3.09    2.02
  -2 -16   9    1.28    1.35
   2 -16  -9    0.71    1.71
   2 -16  -8  102.13    5.41
   2 -16  -8   99.19    5.66
   2 -16  -8   82.75    5.47
  -2 -16   8   79.61    4.84
   2 -16  -7  262.09   11.98
   2 -16  -7  245.22   11.56
   2 -16  -6   34.43    3.45
   2 -16  -6   39.88    3.79
   2 -16  -6   39.84    3.74
   2 -16  -6   29.75    3.36
   2 -16  -5   60.01    4.78
  -2 -16   5   61.79    4.29
   2 -16  -5   64.58    4.69
   2 -16  -5   77.82    5.04
   2 -16  -5   66.19    5.25
   2 -16  -4  135.50    7.79
  -2 -16   4  143.06    7.46
   2 -16  -4  129.03    7.61
   2 -16  -4  141.54    7.86
   2 -16  -4  138.57    8.35
   2 -16  -3   24.34    3.54
  -2 -16   3   22.83    2.80
   2 -16  -3   13.71    2.84
   2 -16  -3   21.95    3.13
  -2 -16   3   25.38    3.64
   2 -16  -3   22.78    3.05
   2  16  -2   75.06    4.81
  -2 -16   2   86.25    5.95
   2 -16  -2   84.57    5.32
   2 -16  -2   86.46    6.23
   2 -16  -2   84.23    5.35
   2  16  -1   13.81    2.40
  -2 -16   1   16.70    3.14
   2 -16  -1   16.81    2.81
   2 -16  -1   14.34    3.26
   2 -16  -1   12.20    2.36
   2 -16   0    4.90    2.52
  -2 -16   0    7.71    2.75
   2 -16   0    6.47    1.97
   2  16   0    9.38    2.29
  -2 -16  -1    6.88    2.83
   2  16   1    4.13    2.20
  -2 -16  -1    5.17    2.79
   2 -16   1    4.94    2.89
   2 -16   2   11.41    3.12
   2  16   2   14.77    2.74
   2  16   3   87.00    5.68
  -2 -16  -3   86.19    6.17
   2 -16   3   90.61    6.20
   2  16   4   39.21    3.78
  -2 -16  -4   43.92    4.29
   2 -16   4   42.36    3.93
  -2 -16  -5   -1.53    2.50
   2  16   6    4.68    2.41
  -2 -16  -6    3.55    2.48
   2  16   7   34.28    3.23
  -2 -16  -7   36.81    3.18
  -2 -16  -7   34.74    3.68
  -2 -16  -7   34.69    3.63
  -2 -16  -8  162.27    8.60
  -2 -16  -8  166.86    8.59
   2  16   8  151.24    7.93
  -2 -16  -9    0.79    1.92
   2  16   9    0.47    1.40
  -2 -16  -9    3.69    1.86
  -2 -16 -10    5.21    1.60
   2 -17  -9   36.37    2.56
   2 -17  -9   32.00    2.67
   2 -17  -8    3.87    1.73
   2 -17  -8    0.82    1.64
  -2 -17   8    2.32    1.25
   2 -17  -7  120.62    5.98
   2 -17  -7  106.82    6.08
  -2 -17   7  102.76    5.46
   2 -17  -7  112.57    6.12
   2 -17  -6    2.95    2.05
   2 -17  -6    4.66    2.21
   2 -17  -6    3.91    2.13
   2 -17  -6    2.62    2.23
   2 -17  -5   19.02    2.87
   2 -17  -5   21.35    3.27
   2 -17  -5   27.99    2.96
   2 -17  -5   23.32    2.88
  -2 -17   5   19.02    2.33
   2 -17  -4   -1.41    2.52
   2 -17  -4    0.53    2.09
   2 -17  -4    2.87    2.34
  -2 -17   4    0.55    1.73
   2 -17  -3   78.32    5.08
  -2 -17   3   73.07    4.66
   2 -17  -3   71.65    4.91
   2 -17  -3   67.74    5.51
   2 -17  -2   -0.50    2.78
  -2 -17   2    1.84    1.97
   2 -17  -2    2.81    2.41
  -2 -17   2    3.38    2.65
   2  17  -2    2.17    1.69
   2 -17  -2    0.17    1.96
   2  17  -1  515.42   23.39
   2 -17  -1  514.55   23.53
   2 -17  -1  529.72   23.73
   2 -17  -1  474.66   24.46
  -2 -17   0   25.60    3.50
   2  17   0   25.54    2.92
   2 -17   0   19.96    3.62
  -2 -17  -1  103.15    6.46
   2  17   1   89.10    5.63
   2 -17   1   86.63    6.41
   2  17   2   22.00    2.90
  -2 -17  -2   22.01    3.40
   2 -17   2   17.55    3.36
   2  17   3  172.10    9.07
   2 -17   3  175.08    9.56
   2  17   4    0.16    2.23
   2 -17   4    0.20    2.01
  -2 -17  -4    0.43    2.51
  -2 -17  -4    1.38    1.98
  -2 -17  -5   31.92    3.60
  -2 -17  -5   25.28    3.05
   2  17   6   21.70    2.78
  -2 -17  -6   22.55    3.11
  -2 -17  -6   22.97    2.82
  -2 -17  -6   24.73    2.91
  -2 -17  -7   40.02    3.40
  -2 -17  -7   34.22    2.93
  -2 -17  -7   39.28    3.59
   2  17   7   34.37    3.05
   2  17   8    1.81    1.43
  -2 -17  -8    3.96    1.93
  -2 -17  -8    2.85    1.94
  -2 -17  -9   12.90    1.91
  -2 -17  -9   14.20    1.96
   2 -18  -8  182.84    8.66
   2 -18  -8  176.97    8.48
   2 -18  -7    0.25    1.51
   2 -18  -7    0.36    1.43
   2 -18  -7    1.89    1.60
   2 -18  -6   65.26    4.17
   2 -18  -6   57.04    4.21
   2 -18  -6   67.25    4.11
   2 -18  -5    2.55    1.89
   2 -18  -5    1.73    2.05
   2 -18  -5    1.93    1.97
   2 -18  -4    3.46    2.17
   2 -18  -4    2.98    2.41
  -2 -18   4    6.07    2.17
   2 -18  -4    4.16    1.97
   2 -18  -3    6.50    2.34
   2 -18  -3    2.45    1.85
   2 -18  -3    4.30    2.70
  -2 -18   2  130.44    7.04
   2 -18  -2  114.58    6.53
  -2 -18   2  114.47    6.21
   2 -18  -2  103.76    7.14
  -2 -18   1   11.19    2.76
  -2 -18   1    8.05    2.01
   2  18  -1    9.15    2.02
   2  18   0   34.68    3.12
   2 -18   0   29.70    3.76
  -2 -18  -1   48.51    4.21
   2 -18   1   41.45    4.23
   2  18   1   46.12    3.68
  -2 -18  -2    5.93    2.57
   2 -18   2    2.68    2.53
   2  18   2    0.74    2.10
   2 -18   3    2.44    2.14
   2  18   3    0.15    1.99
  -2 -18  -3    0.19    2.40
   2  18   4   77.15    4.88
  -2 -18  -4   72.94    5.23
   2  18   5    2.69    2.10
  -2 -18  -5    4.22    2.14
  -2 -18  -5    3.82    2.10
   2  18   6    2.41    1.84
  -2 -18  -6    3.17    1.84
  -2 -18  -6    6.62    2.19
   2  18   7   13.66    1.80
  -2 -18  -7   11.78    1.89
  -2 -18  -7    9.23    1.55
  -2 -18  -7   16.18    2.35
  -2 -18  -8    4.29    1.45
   2  18   8    6.17    1.30
  -2 -18  -8    3.88    1.56
   2 -19  -7    5.79    1.27
   2 -19  -6   33.36    2.78
   2 -19  -6   38.97    2.71
   2 -19  -5   16.56    2.34
   2 -19  -5   17.54    2.18
   2 -19  -4    0.18    2.00
   2 -19  -4    1.21    1.63
   2 -19  -3   84.56    5.69
  -2 -19   3   91.31    5.49
  -2 -19   2   11.01    2.63
   2 -19  -2    7.86    2.61
  -2 -19   1   88.24    5.54
  -2 -19   1   84.62    5.31
   2  19  -1   71.60    4.37
   2 -19   0   38.28    3.91
   2  19   0   45.60    3.28
  -2 -19   0   48.73    3.82
  -2 -19  -1   26.27    3.06
  -2 -19  -1   32.71    3.39
   2 -19   1   25.26    3.19
   2  19   1   24.17    2.67
  -2 -19  -2    1.87    2.12
  -2 -19  -2    3.10    2.38
   2 -19   2    0.97    2.01
   2  19   2    1.16    1.88
  -2 -19  -3    1.63    2.19
  -2 -19  -3    6.97    2.50
   2 -19   3    3.76    1.89
   2  19   3    6.02    1.93
  -2 -19  -4    5.82    2.12
  -2 -19  -4    9.04    2.28
   2  19   4    6.37    1.92
  -2 -19  -5   10.74    2.07
  -2 -19  -5    9.84    2.16
   2  19   5    8.76    1.89
  -2 -19  -6    3.08    1.65
  -2 -19  -6   -0.44    1.31
   2 -20  -5   51.82    3.41
   2 -20  -4    8.35    1.86
   2 -20  -3    7.27    1.99
  -2 -20   2   83.71    4.97
   2 -20  -2   73.48    5.06
  -2 -20   1    2.89    2.00
   2 -20   0   42.29    3.71
  -2 -20   0   50.65    3.46
   2  20   0   39.18    2.88
  -2 -20  -1   -0.42    1.74
   2  20   1    2.13    1.54
   2 -20   1   -0.17    1.82
  -2 -20  -1    2.30    2.18
   2 -20   2   25.95    2.78
  -2 -20  -2   28.37    3.01
  -2 -20  -2   34.97    2.90
   2  20   2   32.80    2.66
  -2 -20  -3    3.43    1.76
   2  20   3    3.44    1.59
  -2 -20  -3    3.73    1.78
  -2 -20  -4   22.68    2.44
   2  20   4   19.90    2.12
  -2 -20  -4   26.48    2.37
  -2 -20  -5   18.98    2.01
   2  20   5   21.87    1.93
  -2 -20  -5   19.90    2.03
  -2 -21   1  160.94    8.03
   2 -21   0   37.46    3.03
  -2 -21   0   38.71    3.03
   2 -21   1   41.82    3.13
   3   0 -15  121.01    7.22
  -3   0  14   -0.18    1.95
  -3   0  14   -0.88    1.54
   3   0 -14    1.35    2.72
  -3   0  13    7.78    2.72
  -3   0  13   10.13    2.09
  -3   0  12   -2.75    5.19
  -3   0  12   -1.54    3.67
  -3   0  12   -0.89    2.64
  -3   0  11  236.57   13.67
  -3   0  11  266.14   19.03
  -3   0  10   -1.75    4.49
  -3   0  10    1.16    1.79
  -3   0  10    1.24    1.53
  -3   0   9  456.76   20.47
  -3   0   9  469.74   20.21
  -3   0   9  450.86   20.43
  -3   0   8    1.41    3.07
  -3   0   8   -0.35    1.31
  -3   0   8    2.06    1.30
  -3   0   8   -1.03    1.28
  -3   0   7  325.02   14.61
  -3   0   7  326.60   14.61
  -3   0   7  282.84   18.52
  -3   0   6    3.82    1.21
  -3   0   6   -2.32    3.12
  -3   0   5 3206.44  136.33
  -3   0   5 3237.16  140.44
   3   0  -4    1.38    1.12
  -3   0   4   -0.50    2.19
   3   0  -3 3358.84  139.21
  -3   0   3 2943.28  142.71
  -3   0   2   -0.15    1.13
  -3   0   2   -0.93    2.26
  -3   0   1  937.11   40.65
  -3   0   0    0.12    0.97
   3   0   0   -0.31    1.60
   3   0   1  190.57   10.60
   3   0   2    0.45    1.48
   3   0   2    0.28    1.49
   3   0   3   54.28    4.40
   3   0   4   -0.55    1.74
   3   0   5 1338.67   61.83
   3   0   5 1434.89   59.40
   3   0   5 1367.89   59.46
   3   0   6   -0.74    2.37
   3   0   6    1.11    1.20
   3   0   7  536.66   27.05
   3   0   7  554.87   23.87
   3   0   7  532.55   23.93
   3   0   8   -0.13    1.59
   3   0   8    4.55    3.97
   3   0   8    1.13    1.54
   3   0   8   -0.93    1.76
   3   0   8   -0.50    1.81
   3   0   9    9.54    2.18
   3   0   9    7.49    2.13
   3   0   9    8.84    2.19
   3   0   9    9.15    2.29
   3   0   9   16.16    4.84
   3   0  10   -0.31    2.36
   3   0  10   -0.71    2.09
   3   0  10    2.57    3.91
   3   0  10    2.61    2.19
   3   0  11   20.48    5.49
   3   0  11   18.26    2.82
   3   0  11   21.15    3.15
   3   0  12   -1.37    4.60
   3   0  12    1.19    2.75
   3   0  12    0.37    2.18
  -3   0 -12    1.24    5.86
   3   0  12    0.35    2.17
   3   0  13  288.62   12.93
   3   0  13  263.30   12.11
   3   0  14    1.20    2.30
   3   0  14    0.68    1.51
   3   0  15   90.35    5.04
   3   1 -15   30.70    3.37
  -3   1  14   21.15    2.92
  -3   1  14   25.10    2.45
   3   1 -14   21.01    3.66
  -3  -1  13    0.54    1.63
   3   1 -13    2.76    3.22
  -3   1  13    2.89    2.53
  -3  -1  12   21.53    4.89
  -3   1  12   20.85    6.12
  -3   1  12   26.18    3.68
  -3   1  11  121.93    7.83
  -3  -1  11  138.13    7.32
  -3   1  11  109.53   11.76
  -3  -1  11  125.48    9.92
  -3  -1  11  134.79    6.87
  -3   1  10  554.95   24.00
  -3  -1  10  541.66   24.13
  -3   1  10  478.43   29.95
  -3   1  10  541.53   24.33
  -3  -1  10  549.69   24.51
  -3   1   9   93.33    5.47
  -3  -1   9   94.64    5.47
  -3   1   9   92.74    5.31
  -3  -1   9   94.47    5.16
  -3   1   9   96.59    5.05
  -3   1   9   89.05    9.65
  -3   1   8   14.69    3.98
  -3  -1   8    8.73    1.56
  -3   1   8    9.52    1.82
  -3   1   8    9.84    1.49
  -3   1   8    8.34    1.69
  -3  -1   8    8.15    1.90
  -3   1   7  289.12   18.59
  -3   1   7  318.33   14.61
  -3  -1   7  305.00   14.32
  -3   1   7  332.22   14.24
  -3   1   7  326.17   14.47
  -3  -1   7  319.15   14.57
  -3   1   6  113.59    5.66
  -3   1   6  116.22    5.89
  -3  -1   6  115.75    5.63
  -3   1   6   97.51    8.72
  -3  -1   5    1.66    0.96
  -3   1   5    1.20    1.19
   3  -1  -4 1958.79   82.52
  -3   1   4 1807.43   85.04
  -3  -1   3  132.30    7.35
   3  -1  -3  141.27    7.05
  -3  -1   2  427.27   19.53
  -3   1   2  427.79   22.14
  -3  -1   1 1151.63   49.54
  -3   1   1 1141.84   49.37
   3   1   0 2485.18  103.36
  -3   1   0 2349.62  101.18
   3   1   1  455.76   21.88
   3   1   2   11.21    2.24
   3   1   2    8.77    1.97
   3   1   3  313.30   15.61
   3   1   4  320.48   16.16
   3   1   5  284.94   15.29
   3   1   5  299.76   13.13
   3   1   5  287.17   13.01
   3  -1   5  292.90   13.02
   3   1   6   64.63    5.84
   3   1   6   62.19    3.49
   3  -1   6   59.55    3.44
   3   1   6   59.92    3.60
   3   1   7   20.85    4.11
   3  -1   7   16.52    1.94
   3   1   7   17.32    2.10
   3   1   7   15.12    1.89
   3   1   8   25.26    2.52
   3  -1   8   24.58    2.76
   3   1   8   22.13    2.58
   3   1   8   28.04    2.75
   3  -1   8   28.33    2.63
   3   1   9   75.99    4.75
   3   1   9   73.47    7.60
   3   1   9   65.89    4.77
   3  -1   9   77.07    5.00
   3   1   9   79.59    4.97
   3  -1   9   80.58    4.85
   3   1   9   76.38    4.80
   3   1  10  181.45    9.19
   3   1  10  203.52   13.42
   3  -1  10  172.66    9.53
   3   1  10  160.78    9.24
   3   1  10  199.67    9.63
   3   1  10  181.73    9.28
   3   1  11   86.65    8.98
   3   1  11   82.79    5.42
   3  -1  11   71.62    5.33
   3   1  11   75.63    5.17
   3   1  11   82.58    5.25
   3   1  12   56.93    7.51
   3   1  12   63.42    4.61
   3   1  12   64.14    4.92
   3  -1  12   71.84    4.23
   3   1  12   61.10    4.41
   3  -1  12   58.80    4.61
   3  -1  13   27.40    2.94
   3   1  13   25.17    2.96
   3  -1  13   21.83    2.87
   3   1  13   23.69    2.64
   3   1  13   28.47    3.42
   3   1  13   24.44    2.66
   3  -1  13   23.53    2.44
   3   1  14   51.89    3.78
   3   1  14   46.12    3.08
   3   1  15   49.95    3.20
   3   1  15   39.92    2.57
   3   2 -15  118.26    6.77
  -3   2  15  113.75    5.80
  -3   2  14    1.34    1.83
  -3   2  14    8.49    2.29
  -3  -2  14    4.88    2.08
   3   2 -14    3.46    2.46
  -3   2  13   40.17    3.97
  -3  -2  13   44.69    4.10
  -3  -2  13   39.83    2.91
   3   2 -13   45.51    4.92
  -3  -2  12  160.24    8.23
  -3  -2  12  165.54    8.02
  -3   2  12  168.78    9.16
  -3  -2  12  162.72    9.08
  -3   2  12  170.63   13.88
  -3  -2  12  138.17   12.90
  -3  -2  12  154.32   11.02
  -3  -2  11   21.05    2.56
  -3  -2  11   15.84    4.33
  -3   2  11   20.82    3.30
  -3  -2  11   16.04    3.12
  -3  -2  11   14.99    2.81
  -3   2  11   14.90    5.89
  -3  -2  11   20.27    5.93
  -3   2  10   33.58    6.99
  -3  -2  10   42.93    7.30
  -3  -2  10   42.52    3.76
  -3  -2  10   42.82    3.35
  -3  -2  10   42.57    5.85
  -3   2   9  794.15   34.33
  -3  -2   9  711.34   36.61
  -3   2   9  737.13   39.55
  -3  -2   9  777.49   39.61
  -3   2   9  801.32   33.94
  -3  -2   9  774.80   34.23
  -3  -2   9  768.99   33.92
  -3  -2   8  117.17    6.23
  -3   2   8  111.29    5.82
  -3   2   8  116.47    6.26
  -3   2   8  100.37    9.52
  -3  -2   8  104.07    9.61
   3  -2  -8  104.87    9.19
  -3   2   7  206.19    9.39
   3  -2  -7  182.14   12.76
  -3  -2   7  197.92    9.24
  -3   2   7  200.27    9.76
  -3  -2   7  194.86   13.37
  -3   2   7  195.94   13.46
  -3   2   6   18.48    1.67
  -3  -2   6   18.27    1.54
  -3   2   6   17.92    2.01
  -3  -2   6   21.02    4.44
  -3   2   6   20.89    4.44
  -3  -2   6   22.50    1.98
   3  -2  -6    9.69    3.12
  -3   2   5   71.74    3.84
  -3  -2   5   49.78    3.49
  -3   2   5   63.31    6.14
  -3  -2   5   45.95    5.51
   3  -2  -5   63.59    4.82
   3  -2  -5   47.31    5.15
  -3  -2   5   54.09    4.67
  -3  -2   5   55.91    3.34
   3  -2  -4   44.03    3.78
  -3  -2   4   40.88    4.83
  -3   2   4   40.71    4.86
  -3  -2   4   40.10    3.72
  -3   2   3  901.43   40.26
   3  -2  -3  842.15   37.65
  -3  -2   3  884.45   40.26
  -3  -2   3  822.79   37.63
  -3   2   2  416.11   21.21
  -3  -2   2  426.35   21.34
  -3  -2   2  401.60   18.83
  -3  -2   1  804.86   36.39
   3   2  -1  864.79   38.52
   3  -2  -1  870.79   38.60
  -3   2   0  775.19   34.22
   3   2   0  833.38   36.31
   3  -2   0  808.25   36.27
   3   2   1  388.56   19.29
   3  -2   1  412.34   19.43
   3  -2   2   88.28    6.11
   3   2   2   95.49    6.22
   3   2   2   92.26    5.95
   3  -2   2   93.54    5.94
   3  -2   3  491.26   23.21
   3   2   3  497.48   23.24
   3   2   4   85.75    5.97
   3  -2   4   83.48    5.92
   3   2   5 1054.25   48.17
   3  -2   5 1025.46   48.06
   3   2   5 1072.66   45.82
   3  -2   5 1081.02   45.58
   3  -2   5 1075.36   45.83
   3   2   5 1066.62   45.74
   3   2   6  146.09    9.31
   3  -2   6  127.53    8.96
   3   2   6  143.05    6.88
   3  -2   6  141.04    6.86
   3   2   6  138.13    6.81
   3   2   7   40.38    5.01
   3  -2   7   34.33    4.69
   3   2   7   37.73    2.74
   3   2   7   33.93    2.74
   3  -2   7   37.81    2.87
   3  -2   8    0.79    1.79
   3   2   8    1.90    1.59
   3   2   8    2.14    1.66
   3   2   8    6.46    3.49
   3  -2   8    6.96    3.77
   3   2   8    1.49    1.86
   3  -2   8    2.91    1.69
   3   2   8    0.98    1.81
   3  -2   8    1.22    1.88
   3   2   9  266.58   12.41
   3   2   9  258.89   15.82
   3  -2   9  256.47   15.65
   3  -2   9  247.34   11.88
   3   2   9  249.09   12.00
   3   2   9  229.95   12.04
   3  -2   9  258.17   12.46
   3   2   9  248.66   12.07
   3  -2   9  261.52   12.10
   3   2  10  641.82   27.72
   3  -2  10  631.99   27.22
   3   2  10  612.07   27.31
   3   2  10  630.18   27.40
   3  -2  10  637.97   27.41
   3   2  10  573.96   31.31
   3  -2  10  613.85   31.66
   3  -2  10  595.24   27.67
   3   2  10  552.23   27.28
   3   2  11   65.23    4.55
   3  -2  11   62.24    4.45
   3   2  11   63.51    4.78
   3  -2  11   61.58    4.62
   3  -2  11   69.49    4.10
   3   2  11   58.07    7.78
   3  -2  11   54.45    7.47
   3   2  11   56.66    4.32
   3  -2  11   58.80    4.73
  -3  -2 -12    7.97    6.28
  -3   2 -12   11.85    6.54
   3  -2  12    3.96    4.31
   3   2  12    1.98    4.02
   3   2  12    2.00    2.36
   3  -2  12    4.47    2.43
   3  -2  12    2.44    2.42
   3   2  12    0.43    1.88
   3  -2  12    1.12    1.79
   3   2  12    1.16    2.58
   3  -2  12    1.82    2.73
   3   2  13   11.26    2.65
   3  -2  13   13.70    2.64
   3   2  13    9.53    1.89
   3   2  13   14.87    3.02
   3  -2  13    9.97    2.79
   3   2  13   11.00    2.34
   3  -2  13   10.98    1.84
   3   2  14   77.21    4.71
   3   2  14   91.31    5.15
   3  -2  14   90.55    5.13
   3   2  14   76.55    4.48
   3  -2  14   66.22    4.58
   3   2  15   36.32    2.76
   3  -2  15   32.94    2.59
   3   2  15   30.45    2.25
  -3   3  15    1.49    1.34
   3   3 -15    1.15    1.88
   3  -3 -15    2.13    2.05
   3   3 -14   37.58    3.93
   3  -3 -14   35.24    4.02
  -3   3  14   32.47    3.12
  -3   3  14   42.69    3.38
  -3  -3  14   39.96    3.34
   3  -3 -13    9.45    3.43
   3   3 -13   10.85    3.26
  -3   3  13   11.84    2.76
  -3  -3  13    7.69    2.57
  -3   3  12   12.81    5.58
  -3  -3  12   23.08    5.89
  -3  -3  12   27.73    2.80
  -3  -3  12   25.26    2.31
  -3   3  12   24.31    3.28
  -3  -3  12   25.42    3.43
  -3  -3  12   27.46    4.72
  -3  -3  11   19.43    4.44
  -3  -3  11   20.80    2.81
  -3   3  11   26.09    6.64
  -3  -3  11   25.06    6.54
  -3  -3  11   26.32    3.22
  -3   3  11   21.97    3.21
  -3  -3  11   22.71    3.31
  -3  -3  10   25.52    3.18
  -3  -3  10   19.14    4.55
   3  -3 -10   13.89    4.17
  -3  -3  10   24.24    2.80
  -3   3  10   22.06    6.00
  -3  -3  10   20.41    5.52
  -3   3   9   16.80    2.68
   3  -3  -9   16.56    5.01
  -3  -3   9   15.91    3.90
  -3   3   9   14.56    5.12
  -3  -3   9   13.26    4.83
  -3  -3   9   18.41    2.66
   3  -3  -8  127.28   10.51
  -3   3   8  141.39    6.94
  -3  -3   8  137.47    7.39
  -3  -3   8  137.50   10.76
  -3   3   8  138.13   10.93
  -3   3   8  132.98    7.48
  -3  -3   8  142.57    9.48
   3  -3  -7  229.53   14.77
  -3   3   7  250.93   10.91
  -3   3   7  219.43   11.37
  -3  -3   7  234.37   10.70
  -3   3   7  226.44   14.83
  -3  -3   7  243.55   14.90
  -3  -3   6   66.30    6.22
  -3   3   6   55.76    6.12
   3  -3  -6   57.00    5.19
  -3   3   6   56.48    3.15
  -3  -3   6   54.52    3.50
  -3   3   6   51.00    3.69
   3  -3  -6   59.49    5.97
  -3  -3   5   24.12    2.11
  -3   3   5   25.79    4.27
  -3  -3   5   28.36    4.33
  -3  -3   5   24.18    2.19
  -3   3   5   30.53    2.35
   3  -3  -5   19.81    3.62
  -3  -3   5   30.44    3.57
   3  -3  -5   29.96    3.71
  -3  -3   4  109.51    6.88
   3  -3  -4  105.29    7.07
  -3   3   4  127.83    8.49
  -3  -3   4  103.67    7.85
  -3  -3   3  577.17   27.11
   3  -3  -3  610.28   27.48
  -3   3   3  612.31   29.16
  -3  -3   3  606.61   29.00
  -3  -3   2  528.72   24.80
   3  -3  -2  523.97   24.77
  -3  -3   2  582.78   26.93
   3  -3  -1    8.58    2.39
   3   3  -1   11.18    2.59
  -3  -3   1    9.36    1.69
  -3   3   0  204.28    9.23
   3   3   0  215.10   11.01
   3  -3   0  208.49   10.95
  -3  -3   0  190.10    9.05
   3  -3   1  398.71   19.14
   3   3   1  398.37   19.16
   3   3   2 1085.51   46.61
   3  -3   2 1077.43   46.68
   3  -3   2 1034.24   46.88
   3   3   2 1019.82   46.78
   3   3   3  546.88   25.87
   3  -3   3  576.48   26.04
   3   3   4  190.10   10.45
   3  -3   4  186.44   10.48
   3   3   5  245.83   11.32
   3  -3   5  239.43   11.29
   3   3   5  254.53   13.59
   3  -3   5  284.02   13.86
   3   3   5  248.15   11.37
   3  -3   5  266.25   11.45
   3   3   6   81.05    4.45
   3  -3   6   85.85    4.46
   3   3   6   91.49    6.89
   3  -3   6   76.77    6.45
   3  -3   6   84.58    4.52
   3   3   6   78.93    4.48
   3  -3   6   85.45    4.23
   3   3   7    2.01    1.51
   3  -3   7    0.67    1.43
   3  -3   7    6.53    1.77
   3   3   7    0.31    1.49
   3  -3   7    1.04    1.56
   3  -3   7    0.86    1.16
   3   3   7   -0.14    1.63
   3   3   7   -0.84    3.08
   3  -3   7    2.53    2.86
   3   3   8  489.54   22.10
   3  -3   8  508.72   22.00
   3   3   8  486.33   25.41
   3  -3   8  486.46   25.33
   3  -3   8  516.32   22.51
   3   3   8  444.31   22.09
  -3  -3  -8  496.13   22.47
   3   3   8  507.26   22.11
   3  -3   8  513.09   22.12
   3  -3   8  498.60   21.68
   3   3   9  290.09   13.58
   3  -3   9  287.99   13.42
   3   3   9  281.66   17.04
   3  -3   9  283.54   17.12
   3   3   9  273.17   13.50
   3  -3   9  291.80   13.96
  -3  -3  -9  287.33   13.87
   3   3   9  285.69   13.55
   3  -3   9  288.82   13.59
   3  -3   9  293.52   13.06
   3  -3  10  551.86   25.92
   3   3  10  539.64   25.42
   3   3  10  564.20   25.55
   3  -3  10  592.14   25.44
   3   3  10  577.10   25.56
   3  -3  10  576.36   25.58
   3  -3  10  591.73   25.00
   3   3  10  553.98   29.52
   3  -3  10  530.01   29.39
   3   3  11  140.45    7.90
   3  -3  11  157.74    8.62
   3  -3  11  153.74    8.12
   3   3  11  146.28    8.18
   3  -3  11  169.41    8.51
   3   3  11  155.12    8.36
   3  -3  11  168.00    7.69
   3   3  11  151.23   11.95
   3  -3  11  144.54   11.72
   3   3  12  249.81   15.73
   3  -3  12  233.63   15.53
   3   3  12  219.29   10.95
   3  -3  12  224.69   11.69
   3  -3  12  230.20   10.70
   3  -3  12  251.89   11.67
   3   3  12  249.93   11.62
   3  -3  12  228.27   10.69
   3   3  12  223.46   11.39
   3   3  13    9.23    2.38
   3   3  13   13.45    2.82
   3  -3  13   10.86    2.80
   3   3  13   11.02    2.43
   3  -3  13   12.99    2.63
   3  -3  14   74.68    4.95
   3   3  14   86.89    5.03
   3   3  14   83.30    4.82
   3  -3  14   89.78    5.18
   3  -3  15    7.86    1.62
   3   3  15    8.19    1.67
   3   3  15    3.98    1.22
   3   3  15    5.08    1.38
  -3   4  15    6.74    1.52
  -3  -4  15   12.56    1.63
   3  -4 -15    6.92    1.96
   3   4 -15    7.74    1.83
  -3   4  14   -2.35    2.14
   3   4 -14    0.60    2.14
   3  -4 -14    2.61    2.45
  -3  -4  13  172.43    8.82
  -3   4  13  187.86    9.19
  -3  -4  13  180.65    9.10
   3   4 -13  163.24    9.78
   3  -4 -13  170.89   10.05
   3   4 -12  117.18    7.86
   3  -4 -12  122.41    7.98
  -3  -4  12  121.14    6.81
  -3  -4  12  128.90    7.28
  -3   4  12  117.54   10.89
  -3  -4  12  109.29   10.31
  -3   4  12  128.46    7.14
  -3  -4  12  126.78    7.13
  -3   4  11  742.68   32.66
  -3  -4  11  727.99   32.58
  -3  -4  11  722.08   32.44
  -3  -4  11  717.14   32.81
  -3   4  11  732.83   37.78
  -3  -4  11  765.05   37.63
  -3  -4  11  764.07   35.53
  -3   4  10   26.07    3.32
  -3  -4  10   21.93    4.47
  -3  -4  10   23.39    2.97
  -3  -4  10   18.79    3.08
   3  -4 -10   26.21    5.16
  -3   4  10   23.38    6.04
  -3  -4  10   22.26    5.55
   3  -4  -9   16.20    4.13
  -3   4   9   12.93    4.82
  -3  -4   9   16.80    4.62
  -3  -4   9   14.07    3.89
  -3  -4   9   16.36    2.80
   3  -4  -9   11.77    4.47
  -3   4   9   13.14    2.73
  -3  -4   8   10.34    2.38
   3  -4  -8   11.68    3.50
   3  -4  -8    9.36    3.95
  -3  -4   8    6.64    3.17
  -3  -4   8   10.53    3.88
   3  -4  -7    5.97    3.30
  -3  -4   7    7.04    2.97
  -3   4   7    5.36    3.16
  -3  -4   7    6.77    3.14
   3  -4  -7    6.95    3.16
  -3  -4   6   99.91    8.07
  -3   4   6   90.35    7.89
   3  -4  -6  112.29    7.93
  -3   4   6  108.60    5.14
   3  -4  -6   86.21    8.02
  -3  -4   6  100.62    5.66
   3  -4  -5  616.45   29.04
  -3   4   5  646.39   29.59
  -3  -4   5  603.10   29.23
  -3   4   5  603.99   26.32
  -3  -4   5  593.26   26.26
  -3  -4   5  586.15   26.43
  -3  -4   4  817.34   39.81
  -3  -4   4  890.17   38.62
   3  -4  -4  927.62   40.90
  -3   4   4  961.94   41.59
  -3  -4   4  927.93   41.38
   3  -4  -3  299.97   16.42
   3  -4  -3  328.25   15.88
  -3  -4   3  314.20   16.49
  -3   4   3  309.04   16.65
  -3  -4   3  313.31   15.30
   3  -4  -2   52.64    3.88
  -3   4   2   47.12    4.62
  -3  -4   2   45.39    4.43
  -3  -4   2   42.67    3.60
   3   4  -1  102.64    6.75
   3  -4  -1  101.31    6.71
  -3  -4   0  369.81   17.14
   3   4   0  405.88   18.67
   3  -4   0  418.38   18.74
  -3   4   0  384.35   16.98
   3  -4   1  160.65    8.87
   3   4   1  157.56    8.81
   3  -4   2   11.29    2.10
   3   4   2    8.35    2.05
   3   4   2    9.61    2.09
   3  -4   2   10.70    2.30
   3   4   3    8.85    2.16
   3  -4   3    6.08    2.06
   3  -4   4   22.18    3.15
   3   4   4   28.72    3.37
   3  -4   5   64.12    3.43
   3   4   5   57.77    3.48
   3  -4   5   67.02    3.62
   3   4   5   67.41    3.64
   3   4   5   68.95    5.39
   3  -4   5   71.35    5.49
   3   4   5   67.63    3.60
   3   4   6    0.18    1.23
   3  -4   6    1.12    1.30
   3   4   6    1.85    1.11
   3  -4   6    0.71    2.28
   3   4   6    0.36    2.50
   3   4   6    1.62    1.27
   3  -4   6    0.63    1.30
   3  -4   6    0.18    0.92
   3   4   7 1252.15   54.82
   3   4   7 1252.06   55.08
   3  -4   7 1310.24   55.02
   3  -4   7 1283.83   55.06
   3   4   7 1306.29   55.08
   3  -4   7 1308.44   54.68
   3   4   7 1262.77   58.10
   3  -4   7 1282.05   58.07
  -3  -4  -8   39.91    3.54
   3   4   8   39.31    5.34
   3  -4   8   38.84    5.37
   3   4   8   41.25    3.26
   3  -4   8   49.88    3.29
   3  -4   8   43.29    3.58
   3  -4   8   45.67    2.83
   3   4   8   45.72    3.33
   3  -4   8   42.17    3.30
  -3  -4  -9   34.58    3.40
   3   4   9   37.47    5.60
   3  -4   9   41.42    5.87
   3   4   9   34.58    3.21
   3  -4   9   43.86    3.24
   3  -4   9   33.17    3.45
   3   4   9   34.36    3.20
   3  -4   9   38.34    3.38
   3  -4   9   35.84    2.58
   3  -4  10    3.25    2.57
  -3  -4 -10    6.09    2.21
   3   4  10    8.57    2.53
   3  -4  10    7.65    2.63
   3  -4  10    8.90    1.75
   3   4  10    6.44    4.48
   3  -4  10    4.13    4.55
   3   4  10    6.19    2.49
   3  -4  10    6.95    2.21
   3  -4  11   40.81    6.70
   3   4  11   42.47    6.30
   3  -4  11   43.68    3.02
   3  -4  11   43.01    2.98
   3   4  11   45.77    3.89
   3  -4  11   45.25    3.93
   3   4  11   42.11    3.70
   3  -4  11   45.27    4.19
   3   4  12    2.41    2.52
   3  -4  12    0.77    2.32
   3   4  12   -0.30    2.34
   3  -4  12   -0.18    2.57
   3   4  13  113.40    6.05
   3   4  13   91.74    5.65
   3  -4  13   96.93    5.83
   3   4  13   96.62    5.77
   3  -4  13  102.05    6.01
   3   4  14   50.37    3.48
   3  -4  14   48.24    3.47
   3   4  14   46.01    3.35
   3   4  14   50.59    3.46
   3  -4  14   48.76    3.60
   3   4  15   28.81    2.16
  -3   5  15    5.60    1.33
  -3  -5  15    4.96    1.25
  -3   5  15    5.87    1.39
   3  -5 -15    8.53    1.69
   3   5 -15    5.77    1.55
   3  -5 -14    5.51    2.35
   3   5 -14    3.58    2.12
  -3   5  14    1.53    1.92
   3  -5 -13    2.38    2.52
   3   5 -13    1.10    2.24
  -3  -5  13    4.19    1.89
  -3  -5  13    1.07    1.90
  -3   5  13    1.77    1.97
  -3  -5  12   96.49    6.00
  -3   5  12  110.38    6.03
  -3  -5  12   99.75    5.88
   3  -5 -12  102.73    6.89
   3   5 -12   94.11    6.61
  -3  -5  12   96.56    6.35
  -3  -5  11    6.97    2.72
  -3  -5  11    3.54    2.26
  -3  -5  11    4.09    3.65
  -3   5  11    6.09    4.07
  -3  -5  11    7.66    4.30
  -3   5  11    6.96    2.31
  -3  -5  11    2.21    2.08
  -3   5  10   28.89    6.07
  -3  -5  10   27.90    5.97
  -3   5  10   36.71    3.29
  -3  -5  10   32.07    3.16
  -3  -5  10   33.18    3.65
  -3  -5  10   35.56    3.41
   3  -5 -10   29.89    6.22
   3  -5 -10   41.05    6.07
  -3  -5  10   23.76    4.54
  -3  -5   9  259.79   14.17
   3  -5  -9  250.64   16.75
  -3  -5   9  217.65   11.89
   3  -5  -9  235.16   15.04
  -3  -5   9  250.26   15.35
  -3   5   9  234.42   15.38
  -3  -5   8    6.26    3.24
  -3  -5   8    4.78    2.28
  -3   5   8    8.64    4.28
  -3  -5   8    7.09    3.71
   3  -5  -8    5.69    3.35
   3  -5  -8    8.54    4.33
   3  -5  -7   33.61    3.04
  -3   5   7   33.04    4.88
  -3  -5   7   34.41    4.70
   3  -5  -7   25.73    4.57
  -3  -5   7   43.57    4.67
  -3   5   7   28.08    3.06
   3  -5  -7   35.73    5.50
  -3  -5   7   30.17    3.01
  -3  -5   6   55.14    5.08
   3  -5  -6   47.80    5.58
  -3  -5   6   49.35    5.38
  -3   5   6   60.13    5.64
  -3  -5   6   52.04    3.65
  -3   5   6   42.01    3.58
  -3  -5   5   43.42    3.21
   3  -5  -5   50.19    5.17
  -3   5   5   39.08    4.71
  -3  -5   5   36.00    4.27
   3  -5  -4  532.97   25.66
  -3   5   4  552.07   25.70
  -3  -5   4  498.31   25.38
   3  -5  -4  528.39   26.36
  -3  -5   3   32.43    3.48
  -3   5   3   34.38    3.78
  -3  -5   3   35.52    3.82
   3  -5  -3   29.30    3.54
  -3  -5   3   32.88    2.50
   3  -5  -3   24.64    3.65
  -3   5   2   31.24    3.71
   3  -5  -2   39.89    3.56
  -3  -5   2   37.71    3.81
   3  -5  -2   35.35    3.91
   3   5  -1  141.93    8.29
   3  -5  -1  148.35    8.39
  -3  -5   0   65.34    3.99
   3  -5   0   80.56    5.04
   3   5   0   68.86    4.77
  -3  -5  -1   19.03    2.15
   3   5   1   13.44    2.17
   3  -5   1   20.12    2.46
   3  -5   2  273.27   13.68
   3   5   2  269.42   13.69
   3   5   3 2272.57   96.17
   3   5   3 2240.71   95.97
   3   5   3 2281.00   97.68
   3  -5   3 2370.52   97.90
   3   5   4  289.15   13.98
   3   5   4  309.57   15.69
   3  -5   4  306.01   15.73
   3   5   4  328.86   13.97
   3  -5   4  323.72   13.96
   3   5   5  151.08    7.15
   3  -5   5  156.99    7.21
   3  -5   5  151.61    6.98
   3   5   5  140.32    7.05
   3   5   5  135.88    8.90
   3  -5   5  149.70    9.12
   3   5   5  154.05    7.26
   3  -5   6   23.14    1.67
   3   5   6   23.52    2.07
   3  -5   6   22.97    2.06
   3   5   6   22.56    1.99
   3  -5   6   14.93    3.26
   3   5   6   21.99    3.67
   3  -5   6   23.45    1.86
   3   5   6   23.77    2.11
   3   5   7    5.80    1.36
   3   5   7    6.34    1.66
   3  -5   7    7.73    1.69
   3  -5   7    7.58    1.23
   3  -5   7    4.14    1.81
   3   5   7    5.72    1.73
  -3  -5  -7    6.10    1.85
   3   5   7    4.45    2.97
   3  -5   7    6.01    3.03
   3  -5   7    6.03    1.38
   3   5   7    8.76    2.04
   3   5   8 1191.33   53.23
  -3  -5  -8 1200.93   53.78
   3   5   8 1248.30   56.62
   3  -5   8 1236.26   56.60
   3  -5   8 1263.11   52.86
   3   5   8 1275.51   53.22
   3  -5   8 1259.47   53.21
   3  -5   8 1223.41   52.69
   3   5   8 1231.77   53.85
   3   5   9  226.34   11.48
  -3  -5  -9  232.10   12.05
   3   5   9  220.73   14.60
   3  -5   9  229.72   14.59
   3  -5   9  234.17   10.95
   3  -5   9  254.69   11.50
   3   5   9  239.65   11.46
   3  -5   9  246.17   10.84
   3   5   9  235.63   12.10
   3   5  10   42.40    4.07
   3   5  10   41.03    3.50
   3  -5  10   36.81    3.42
   3   5  10   38.30    3.48
  -3  -5 -10   29.55    3.61
   3  -5  10   39.76    6.17
   3   5  10   29.02    5.68
   3  -5  10   39.79    3.84
   3  -5  10   39.99    2.75
  -3  -5 -11  327.87   20.86
  -3   5 -11  302.63   20.20
   3   5  11  298.36   17.98
   3  -5  11  276.20   17.79
   3   5  11  284.27   15.02
   3  -5  11  301.89   14.83
   3   5  11  326.00   14.56
   3  -5  11  327.44   14.59
   3   5  11  294.79   14.46
   3  -5  12   91.34    6.09
   3  -5  12  103.10    5.91
   3   5  12  104.48    5.93
   3   5  12   88.59    5.72
   3  -5  13    4.71    2.43
   3   5  13    5.31    2.18
   3   5  13    4.84    2.27
   3  -5  13    3.85    2.15
   3   5  14   23.49    2.40
   3  -5  14   29.12    2.46
   3   5  14   28.38    2.56
   3   6 -14   13.33    2.12
   3  -6 -14   12.66    2.25
   3  -6 -14   14.48    1.83
  -3   6  13   99.78    5.24
  -3  -6  13  100.14    5.23
   3  -6 -13   80.18    5.81
   3   6 -13   85.07    5.70
  -3  -6  13   87.43    5.38
  -3   6  12   44.60    3.41
  -3  -6  12   39.76    3.30
   3   6 -12   40.26    4.03
   3  -6 -12   33.66    3.97
  -3  -6  12   43.14    3.72
   3  -6 -11   22.53    3.33
   3   6 -11   23.06    3.41
   3  -6 -11   21.22    5.20
  -3  -6  11   25.05    3.39
  -3   6  11   23.32    2.78
  -3  -6  11   27.45    2.89
  -3  -6  11   28.53    4.77
  -3   6  11   17.59    4.80
  -3  -6  11   22.90    5.03
  -3   6  10   21.39    5.25
  -3  -6  10   20.14    4.79
   3  -6 -10   16.48    5.45
  -3   6  10   15.14    3.18
  -3   6  10   18.16    2.58
  -3  -6  10   17.02    2.54
   3  -6 -10   16.89    4.96
   3  -6 -10   17.36    3.23
   3   6 -10   21.41    3.31
  -3  -6  10   22.96    4.58
   3  -6  -9   16.49    5.60
  -3  -6   9   24.13    4.37
  -3   6   9   20.51    3.15
  -3   6   9   22.27    4.97
  -3  -6   9   10.52    4.22
   3  -6  -9   22.32    4.87
   3  -6  -8  200.94   13.88
   3  -6  -8  226.18   15.37
  -3  -6   8  226.13   12.65
  -3   6   8  197.20   13.34
   3  -6  -8  211.26   10.88
  -3   6   8  194.98   10.74
  -3  -6   8  218.49   13.30
  -3  -6   7  148.23    7.87
  -3   6   7  130.46    9.64
   3  -6  -7  133.48   10.42
  -3  -6   7  154.33    9.54
   3  -6  -7  138.20    7.75
  -3   6   7  141.26    7.75
   3   6  -7  134.33    7.66
   3  -6  -6  140.85    7.46
  -3   6   6  121.84    7.25
   3  -6  -6  140.42   10.05
  -3   6   6  130.08    9.11
  -3  -6   6  128.61    9.02
  -3  -6   6  141.24    7.48
  -3  -6   6  151.72    9.08
  -3  -6   5  182.89   10.59
  -3   6   5  189.94   11.01
   3  -6  -5  185.55   11.61
  -3  -6   5  162.93   10.56
   3  -6  -5  175.87   11.92
  -3  -6   5  177.25    9.11
  -3  -6   4  125.09    6.77
   3  -6  -4  127.62    8.58
  -3   6   4  129.24    8.29
  -3  -6   4  119.86    7.99
   3  -6  -4  130.34    9.17
  -3   6   4  124.68    6.13
   3  -6  -3   10.19    2.63
  -3   6   3   11.94    2.52
  -3  -6   3   13.74    2.56
  -3  -6   3   11.17    1.68
   3  -6  -3   12.66    2.73
   3  -6  -2  465.75   21.99
  -3  -6   2  410.93   19.65
   3   6  -2  437.68   21.10
   3  -6  -2  421.74   20.99
  -3   6   2  464.04   21.35
  -3  -6   2  482.83   21.32
   3  -6  -2  446.68   21.36
   3   6  -1  517.59   23.54
   3  -6  -1  481.69   23.42
  -3   6   1  506.75   24.01
  -3  -6   1  532.13   24.06
   3  -6   0  111.41    6.22
   3   6   0  109.87    6.21
   3   6   1  667.31   28.37
   3  -6   1  646.29   29.55
   3   6   1  655.12   29.56
  -3  -6  -1  632.07   29.65
   3  -6   2 1598.35   67.43
  -3  -6  -2 1536.20   68.79
  -3  -6  -3 2182.86   93.46
   3   6   3 2197.20   94.54
   3  -6   3 2350.53   94.87
   3   6   3 2148.79   92.92
   3   6   3 2221.75   93.21
   3   6   4  163.66    9.16
   3  -6   4  159.84    9.22
   3  -6   4  162.28    7.36
   3   6   4  151.31    7.36
   3  -6   4  171.00    7.49
   3   6   4  148.33    7.62
   3   6   5  202.70    9.89
   3  -6   5  217.94    9.84
   3  -6   5  214.11   11.97
   3   6   5  202.77   11.82
   3   6   5  209.78   10.19
   3  -6   5  237.57   10.12
   3   6   5  230.05   10.09
   3   6   6  315.02   15.81
   3   6   6  326.69   15.45
   3   6   6  373.93   15.39
   3  -6   6  362.27   15.37
   3   6   6  338.19   15.30
  -3  -6  -6  325.91   15.80
   3   6   6  325.97   17.49
   3  -6   6  335.92   17.67
   3  -6   6  340.88   15.09
   3  -6   6  344.50   15.69
   3   6   7  360.13   17.33
   3   6   7  365.21   16.73
   3   6   7  384.51   16.71
   3  -6   7  390.07   16.73
   3   6   7  356.06   16.68
  -3  -6  -7  358.01   17.27
   3   6   7  378.00   19.37
   3  -6   7  350.94   19.13
   3  -6   7  378.11   16.40
   3  -6   7  372.88   17.13
   3   6   8  279.63   14.48
   3   6   8  284.58   13.63
  -3  -6  -8  286.73   14.46
   3   6   8  291.15   13.83
   3   6   8  293.15   16.60
   3  -6   8  291.16   16.55
   3   6   8  320.04   13.85
   3  -6   8  311.84   13.84
   3  -6   8  309.94   13.44
   3  -6   8  302.53   14.32
   3   6   9  144.96    7.35
   3  -6   9  138.75    7.35
   3   6   9  146.66    7.46
   3   6   9  122.49    7.90
  -3  -6  -9  135.46    7.94
   3   6   9  150.02   10.30
   3  -6   9  141.62   10.13
   3  -6  10    8.48    3.86
   3   6  10    5.26    3.90
   3   6  10    8.52    2.46
   3   6  10    8.13    2.39
   3  -6  10    7.92    2.45
   3   6  10    8.51    2.80
  -3  -6 -10   14.13    2.83
   3   6  11  118.02    7.53
  -3   6 -11   97.98   10.62
  -3  -6 -11  123.25   11.39
   3   6  11  120.23    6.96
   3  -6  11  121.42    7.32
   3   6  11  129.37   10.10
   3  -6  11  106.96    9.50
   3   6  11  143.33    7.14
   3  -6  11  144.64    7.15
   3  -6  12   28.25    3.28
   3   6  12   31.22    3.13
   3  -6  12   31.05    3.05
   3   6  12   23.97    2.98
   3  -6  13   48.72    3.75
   3   6  13   41.70    3.42
   3   6  13   48.61    3.38
   3  -6  13   43.63    3.30
   3   6  13   44.67    3.39
   3   6  14   35.12    2.65
   3  -7 -14   28.34    2.20
  -3   7  14   26.50    1.97
   3   7 -14   22.20    2.11
   3   7 -13    9.02    2.08
  -3  -7  13    6.48    2.05
  -3  -7  12   76.04    5.51
   3  -7 -12   79.26    5.72
   3   7 -12   84.49    5.70
  -3   7  12   98.66    5.12
  -3  -7  12   97.09    5.11
   3   7 -11  111.04    6.98
   3  -7 -11  108.52    7.06
  -3  -7  11  111.74    6.97
  -3   7  11  127.09    6.40
  -3  -7  11  120.80    6.29
  -3  -7  11  128.61    9.01
   3  -7 -11  120.37   10.12
  -3   7  11   97.93    9.00
  -3  -7  11   99.80    8.90
   3   7 -10   22.71    3.19
   3  -7 -10   21.24    3.20
   3  -7 -10   19.62    5.73
  -3   7  10   22.08    3.50
  -3   7  10   23.31    2.57
  -3  -7  10   22.89    2.57
   3  -7 -10   10.85    4.18
  -3   7  10   18.81    4.58
  -3  -7  10   17.82    4.34
  -3  -7  10   24.35    4.50
   3  -7  -9  138.28    8.39
   3   7  -9  141.63    8.37
   3  -7  -9  156.68   13.06
  -3  -7   9  168.22   10.50
  -3   7   9  157.17    7.73
  -3  -7   9  153.31    7.64
  -3   7   9  143.08   10.78
  -3  -7   9  155.76   10.82
   3  -7  -9  134.71   11.38
  -3   7   9  153.52    8.55
  -3   7   8  499.98   22.36
   3  -7  -8  493.03   22.55
  -3  -7   8  528.93   24.49
  -3   7   8  488.50   25.01
  -3  -7   8  515.82   24.97
   3  -7  -8  453.39   25.80
   3  -7  -8  441.96   22.19
   3   7  -8  470.20   22.21
   3  -7  -7   33.08    3.26
  -3  -7   7   31.41    3.49
  -3  -7   7   45.35    5.05
  -3   7   7   23.86    4.30
  -3  -7   7   26.13    4.28
   3  -7  -7   39.93    3.54
  -3   7   7   39.89    3.42
   3  -7  -7   32.64    5.31
   3  -7  -6  200.49   13.71
   3  -7  -6  210.06   13.18
  -3   7   6  211.47   12.04
  -3  -7   6  195.94   11.71
   3  -7  -6  197.71   10.24
  -3  -7   6  217.81   11.91
  -3   7   6  203.12   10.09
  -3  -7   6  177.49   10.15
   3  -7  -5  311.10   16.71
  -3  -7   5  268.71   15.14
  -3   7   5  310.96   15.53
  -3  -7   5  251.92   13.74
  -3  -7   5  348.75   15.93
   3  -7  -5  305.72   17.41
  -3  -7   4  413.19   19.63
   3   7  -4  435.04   18.79
   3  -7  -4  421.49   22.53
  -3   7   4  434.62   20.97
  -3  -7   4  428.02   20.88
   3  -7  -4  414.49   21.80
  -3  -7   3  100.66    6.02
   3   7  -3  108.71    5.47
   3  -7  -3  118.10    7.88
  -3   7   3  115.27    7.12
  -3  -7   3  116.46    7.06
   3  -7  -3  104.95    8.02
   3   7  -2   10.96    1.44
   3  -7  -2    8.68    2.56
   3   7  -2   12.18    2.20
   3  -7  -2   10.35    2.09
  -3  -7   2   13.72    2.33
  -3   7   2   14.16    2.47
  -3  -7   2    9.00    1.64
  -3   7   1    0.50    1.44
  -3  -7   1   -0.48    1.40
  -3  -7   1   -0.96    1.24
   3   7  -1    0.62    1.02
   3   7  -1    0.39    1.28
   3  -7  -1    0.58    1.27
   3  -7   0    6.68    1.32
  -3  -7   0    7.54    1.55
  -3  -7   0    3.97    1.35
   3   7   0    7.19    1.70
   3  -7   0    4.71    1.50
   3   7   0    7.03    1.29
  -3  -7  -1  355.85   16.76
   3  -7   1  351.40   16.58
   3  -7   1  351.22   17.34
   3   7   1  373.85   17.47
  -3  -7  -1  394.39   18.00
   3   7   1  390.06   16.48
  -3  -7  -2  642.99   29.08
   3  -7   2  601.39   27.19
  -3  -7  -2  626.88   27.33
  -3  -7  -3  277.21   13.62
   3   7   3  291.34   13.42
   3   7   3  303.27   13.04
   3   7   4   32.98    3.54
   3  -7   4   33.02    3.66
   3   7   4   37.46    2.72
   3   7   5  436.77   20.15
   3   7   5  444.49   22.14
   3  -7   5  453.52   22.29
   3  -7   5  465.07   20.12
   3   7   5  444.07   20.59
   3   7   5  490.65   20.29
   3  -7   5  481.18   20.27
   3   7   6  258.98   12.57
   3   7   6  307.16   12.46
   3  -7   6  296.79   12.39
   3  -7   6  275.41   12.74
   3   7   6  234.99   12.82
   3  -7   6  264.37   14.43
   3   7   6  263.35   14.45
  -3  -7  -6  252.53   12.87
   3  -7   6  270.41   12.06
   3   7   6  253.53   12.22
   3   7   7   29.11    2.57
   3   7   7   30.10    3.24
   3   7   7   31.44    4.41
   3   7   7   36.05    2.74
   3  -7   7   35.56    2.79
   3  -7   7   24.78    4.07
   3  -7   7   29.24    2.93
  -3  -7  -7   30.71    3.12
   3   7   7   29.40    2.67
  -3  -7  -8  105.17    6.59
   3   7   8  109.00    6.01
   3   7   8  101.30    6.62
   3   7   8  122.07    6.08
   3  -7   8  121.08    6.10
   3   7   8  115.38    8.35
   3  -7   8  116.33    8.52
   3  -7   8  101.67    6.39
   3   7   8  108.08    5.95
   3   7   9  108.79    6.13
   3   7   9   92.33    6.64
   3   7   9  119.11    6.25
   3  -7   9  116.24    6.20
  -3  -7  -9  116.37    6.89
   3   7   9  102.64    8.76
   3  -7   9  101.22    8.58
   3  -7   9  117.41    6.64
   3   7  10  344.54   14.47
   3  -7  10  341.64   14.50
   3   7  10  302.58   14.32
   3  -7  10  290.28   17.26
   3   7  10  297.16   17.38
  -3   7 -10  270.98   18.48
  -3  -7 -10  260.84   18.79
   3   7  10  256.64   14.83
   3  -7  11  206.03   14.20
   3   7  11  232.36   11.60
   3  -7  11  274.27   11.73
   3   7  11  268.68   11.71
   3   7  11  197.36   12.06
  -3  -7 -12   94.84    6.32
   3   7  12   88.85    5.47
   3   7  12   97.40    5.37
   3  -7  12   99.70    5.37
   3   7  12   90.36    5.39
  -3  -7 -13    0.67    1.86
   3  -7  13    3.95    2.10
   3   7  13    0.63    1.69
   3   7  13    1.08    1.57
   3   7  13    3.51    1.83
   3   7  14    7.09    1.59
   3  -8 -14   20.95    1.89
  -3   8  14   23.27    2.22
  -3  -8  13   75.50    4.91
   3   8 -13   78.32    4.65
  -3   8  12   17.28    1.93
   3   8 -12    7.82    2.17
  -3  -8  12   12.43    2.61
  -3  -8  12   15.14    2.75
  -3   8  11  434.55   18.65
  -3  -8  11  446.75   18.66
   3  -8 -11  383.51   19.30
   3   8 -11  407.19   19.34
  -3  -8  11  373.62   19.39
  -3  -8  11  412.33   19.61
   3  -8 -10   19.71    2.98
   3   8 -10   21.95    2.99
   3  -8 -10   26.98    6.59
  -3   8  10   28.05    3.57
  -3  -8  10   24.09    3.51
  -3   8  10   25.16    2.50
  -3  -8  10   22.13    2.43
   3  -8 -10   15.16    4.76
  -3   8   9    3.94    3.17
  -3  -8   9    3.29    3.11
   3  -8  -9    3.96    2.05
   3  -8  -9    9.45    4.75
  -3   8   9    8.13    2.78
  -3  -8   9    5.56    2.78
  -3  -8   9    7.29    3.62
  -3   8   9    7.78    1.88
  -3  -8   9    6.18    1.74
   3  -8  -8  100.77    6.39
   3  -8  -8   98.95    9.61
   3  -8  -8  114.46    6.99
  -3  -8   8  128.17    8.71
  -3  -8   8  107.16    8.43
  -3   8   8  108.34    8.54
  -3   8   8  112.48    6.71
  -3  -8   8  106.55    5.73
   3  -8  -7    2.48    3.81
  -3  -8   7    5.12    3.39
   3  -8  -7    4.62    2.26
  -3   8   7    7.90    2.26
   3  -8  -7    0.75    3.78
  -3   8   7    7.35    3.22
  -3  -8   7   -0.82    2.77
  -3  -8   6   49.65    5.26
  -3   8   6   71.37    5.94
   3  -8  -6   67.97    7.45
   3  -8  -6   66.67    4.72
  -3   8   6   64.62    4.45
   3  -8  -6   64.66    6.71
   3  -8  -5  452.31   22.73
  -3   8   5  403.55   20.82
  -3  -8   5  427.42   20.92
   3  -8  -5  426.40   23.29
  -3   8   4  615.78   28.79
   3  -8  -4  599.63   30.14
  -3  -8   4  652.68   28.87
  -3  -8   4  560.70   27.76
   3   8  -4  636.07   26.91
   3  -8  -4  642.17   31.19
   3  -8  -3  300.41   16.06
   3   8  -3  298.73   12.66
   3  -8  -3  253.49   15.03
  -3   8   3  280.97   14.07
  -3  -8   3  296.36   14.11
  -3  -8   3  242.04   13.14
   3   8  -3  258.51   13.94
   3  -8  -3  269.78   14.00
  -3  -8   2    8.22    1.75
   3   8  -2   12.81    1.59
  -3   8   2   11.45    2.18
  -3  -8   2   14.79    2.14
   3   8  -2    9.45    1.82
   3  -8  -2   10.02    2.81
   3  -8  -2   10.55    1.91
   3  -8  -1  629.64   29.15
   3   8  -1  698.20   29.36
  -3   8   1  661.76   29.69
  -3  -8   1  648.93   29.53
  -3  -8   1  588.35   28.89
   3   8  -1  690.76   28.56
   3  -8   0  314.78   14.89
   3   8   0  316.09   14.95
  -3  -8   0  292.31   14.61
  -3  -8   0  316.56   15.28
  -3   8   0  313.37   15.36
   3  -8   0  321.78   14.38
   3   8   0  320.35   14.26
  -3  -8  -1  892.77   39.62
  -3  -8  -1  903.72   40.70
   3  -8   1  898.10   39.44
   3   8   1  930.91   39.26
   3   8   2    5.89    1.47
  -3  -8  -2    3.59    1.50
   3   8   2    1.95    0.94
  -3  -8  -2    1.71    2.01
   3  -8   2    1.79    1.47
  -3  -8  -3   18.83    3.70
   3   8   3   14.83    1.49
  -3  -8  -3   10.66    1.82
   3   8   4   47.00    2.93
   3   8   4   45.70    3.32
  -3  -8  -4   41.58    5.17
   3   8   5  306.00   15.21
   3   8   5  331.35   16.54
   3  -8   5  335.02   16.60
   3   8   5  342.29   15.18
  -3  -8  -5  330.67   15.37
   3   8   6    6.79    1.42
   3   8   6    1.23    1.64
   3  -8   6    1.76    1.66
   3   8   6    1.35    1.85
  -3  -8  -6    2.22    1.87
   3  -8   6    3.01    1.39
   3   8   6    1.64    2.40
   3  -8   6    2.61    2.28
   3   8   7  828.96   32.93
   3  -8   7  800.77   32.87
   3   8   7  716.16   32.82
   3   8   7  740.39   33.23
   3   8   7  721.18   35.28
   3  -8   7  745.46   35.32
   3   8   7  682.76   33.57
   3  -8   7  768.65   33.42
  -3  -8  -7  747.64   33.75
   3   8   8   17.66    2.26
   3   8   8   13.93    2.15
   3  -8   8   11.46    3.60
   3   8   8   20.99    2.38
   3  -8   8   19.79    2.24
   3   8   8   14.11    3.67
   3   8   8   11.52    2.63
   3  -8   8   14.28    2.72
  -3  -8  -8   12.33    2.80
   3  -8   9   64.63    6.55
   3   8   9   90.28    4.73
   3  -8   9   80.00    4.54
   3   8   9   71.17    4.52
   3   8   9   54.99    4.98
  -3  -8  -9   68.06    5.25
   3  -8   9   74.05    4.93
   3   8   9   68.18    4.35
   3   8  10  200.73    9.94
   3  -8  10  199.65   10.44
   3   8  10  189.03   10.73
   3   8  10  218.17    9.99
   3  -8  10  221.47    9.99
   3   8  11    7.88    2.01
   3  -8  11    5.55    2.02
   3   8  11    4.21    2.31
   3   8  11    2.43    2.69
   3   8  11    5.83    1.98
   3  -8  11    4.92    2.38
   3   8  12    4.47    2.06
   3   8  12    5.00    1.75
  -3  -8 -12    6.24    2.65
   3   8  12    4.79    1.86
  -3  -8 -13   30.79    2.99
   3   8  13   31.59    2.62
   3   8  13   29.08    2.42
   3   8  14    1.30    1.25
  -3   9  14    5.81    1.38
  -3  -9  13   25.54    2.70
   3  -9 -13   38.73    2.76
  -3  -9  12  160.63    8.06
   3  -9 -12  159.62    7.91
  -3  -9  11    3.25    2.53
  -3  -9  11    3.64    2.36
   3  -9 -10    9.96    2.29
  -3  -9  10   12.05    2.90
  -3  -9  10   14.15    1.92
   3  -9 -10   11.30    4.02
  -3   9   9    1.53    2.61
   3  -9  -9    2.60    1.96
   3  -9  -9    0.66    3.66
  -3  -9   9    3.78    1.56
  -3  -9   9    3.65    2.62
   3  -9  -8    7.56    2.55
  -3   9   8    7.16    2.70
  -3  -9   8    6.68    1.58
   3  -9  -8   10.86    5.52
   3  -9  -8   10.46    4.45
   3  -9  -7   91.76    9.45
  -3   9   7   88.01    5.44
   3  -9  -7   78.31    5.72
   3  -9  -7   73.81    8.06
   3  -9  -6 1579.99   71.46
   3  -9  -6 1466.20   66.42
   3  -9  -6 1470.24   69.92
  -3   9   6 1608.18   66.18
  -3   9   5   26.63    2.67
   3  -9  -5   26.81    2.87
   3  -9  -5   18.27    4.62
   3  -9  -5   22.38    4.64
   3  -9  -5   24.59    2.88
  -3  -9   5   23.29    3.25
   3  -9  -4  709.79   34.36
   3  -9  -4  711.69   30.98
   3   9  -4  682.74   29.97
   3  -9  -4  627.42   31.53
   3  -9  -4  711.45   30.89
   3  -9  -4  684.77   33.47
  -3  -9   4  701.74   31.52
   3  -9  -3   82.32    5.63
   3  -9  -3   87.01    7.15
  -3  -9   3   96.65    5.92
   3  -9  -3  111.93    8.22
   3   9  -3  103.23    5.08
  -3  -9   3   76.25    5.52
   3   9  -2   36.75    2.65
   3  -9  -2   29.13    2.77
   3  -9  -2   42.42    4.64
  -3  -9   2   26.53    2.83
   3  -9  -1    5.77    1.59
  -3  -9   1    1.22    1.68
   3   9  -1    3.91    1.37
   3  -9   0  181.38    8.84
  -3  -9   0  176.01    9.24
   3  -9   0  178.80    8.46
   3   9   0  184.40    8.79
   3  -9   1   82.72    5.01
   3   9   1   88.77    4.87
  -3  -9  -1   81.07    5.83
  -3  -9  -1   89.22    5.27
   3   9   2  549.82   24.77
  -3  -9  -2  577.06   25.21
  -3  -9  -2  552.31   26.91
  -3  -9  -3  295.46   14.31
  -3  -9  -3  278.49   16.49
   3   9   3  308.07   13.37
   3   9   4   56.72    3.36
  -3  -9  -4   63.25    6.68
   3   9   4   73.58    4.12
  -3  -9  -4   58.41    4.18
  -3  -9  -4   56.42    3.98
   3   9   4   57.13    3.94
  -3  -9  -5   53.62    6.25
   3   9   5   47.83    3.69
   3  -9   5   55.55    3.56
  -3  -9  -5   48.71    3.89
   3   9   5   53.94    3.80
   3   9   5   50.12    3.19
  -3  -9  -6  104.03    9.58
   3   9   6  117.32    6.83
   3  -9   6  121.94    6.57
   3  -9   6  121.22    7.92
   3   9   6  122.85    6.72
  -3  -9  -6  127.06    7.07
  -3  -9  -7   19.82    4.72
   3   9   7   16.16    2.43
   3  -9   7   12.12    2.34
   3   9   7   14.30    2.74
  -3  -9  -7   12.32    2.75
   3  -9   7   15.97    3.37
   3  -9   8  101.93    5.14
  -3  -9  -8   84.72    9.16
   3   9   8   84.69    5.45
   3  -9   8   98.87    5.78
   3   9   8   91.17    5.12
  -3  -9  -8   93.11    6.18
   3   9   8   94.89    6.07
   3  -9   9    9.01    1.96
  -3  -9  -9    4.59    4.91
   3   9   9    7.03    2.02
   3   9   9    4.52    2.62
  -3  -9  -9    6.27    2.71
   3  -9   9    7.67    2.47
   3   9   9    7.28    1.95
  -3  -9 -10    4.03    4.20
  -3  -9 -10    3.77    2.24
   3   9  10    5.04    2.66
   3   9  10    2.90    2.23
   3  -9  10    9.21    2.53
   3   9  10    7.53    1.94
   3   9  11    6.87    2.76
   3   9  11    9.85    2.00
   3  -9  11    9.78    2.55
   3   9  11   11.65    2.35
   3  -9  12   30.56    2.97
  -3  -9 -12   32.65    3.43
   3   9  12   28.91    2.42
   3   9  12   28.93    2.72
   3   9  13    2.71    1.53
  -3  -9 -13    3.88    1.78
  -3 -10  13   18.30    2.19
   3 -10 -13   19.63    2.03
   3 -10 -12    1.88    1.90
  -3 -10  12    1.91    2.03
   3 -10 -11   35.24    3.48
  -3 -10  11   28.34    3.36
  -3 -10  11   30.18    3.26
  -3 -10  10    5.85    2.51
  -3  10   9    7.97    2.75
  -3 -10   9   12.76    2.80
   3 -10  -9    4.30    4.29
   3 -10  -9    9.49    4.53
   3 -10  -8    0.83    4.27
  -3 -10   8    1.42    2.34
  -3  10   8   -0.17    2.19
   3 -10  -8   -1.28    4.16
   3 -10  -8    1.49    2.52
   3 -10  -7  145.46   12.43
  -3 -10   7  146.14    9.03
   3 -10  -7  150.01   11.63
  -3  10   7  174.13    8.57
  -3  10   6   26.87    3.04
  -3 -10   6   25.75    3.40
   3 -10  -6   30.11    5.63
   3 -10  -6   26.57    3.12
   3 -10  -6   26.44    4.81
   3 -10  -5   16.15    4.44
  -3  10   5   24.46    2.58
   3 -10  -5   17.81    2.75
   3 -10  -5   16.25    4.41
  -3 -10   5   17.84    2.96
   3 -10  -5   18.70    2.85
   3 -10  -4   84.77    5.56
   3 -10  -4   77.70    7.70
   3 -10  -4   91.81    5.82
   3 -10  -4   87.03    7.61
   3  10  -3   82.05    4.86
   3 -10  -3   86.47    7.53
   3 -10  -3   96.79    5.86
   3 -10  -3   92.10    5.52
   3 -10  -2  252.81   12.07
   3 -10  -2  223.82   13.59
   3  10  -2  229.02   11.14
  -3 -10   2  237.53   11.92
   3  10  -1   20.00    2.21
   3 -10  -1   21.89    2.11
  -3 -10   1   20.69    2.71
  -3 -10   0    9.38    2.14
   3 -10   0   12.70    1.64
   3  10   0   12.59    1.94
   3 -10   0   15.52    2.43
   3 -10   1  377.99   17.34
   3  10   1  379.85   16.58
  -3 -10  -1  374.61   17.08
  -3 -10  -2    4.35    2.48
   3 -10   2    1.85    1.66
  -3 -10  -2    2.42    1.47
   3  10   2    1.83    1.42
   3  10   2    2.15    1.56
  -3 -10  -2    3.53    1.86
   3  10   3  230.56   11.41
  -3 -10  -3  254.71   12.09
  -3 -10  -3  247.85   11.71
   3 -10   3  241.22   12.18
  -3 -10  -3  239.84   14.23
  -3 -10  -4  166.46    8.67
   3  10   4  167.27    7.64
  -3 -10  -4  154.72   11.37
   3  10   4  157.20    8.24
  -3 -10  -4  165.74    8.56
   3 -10   4  158.74    8.74
   3  10   4  155.10    8.32
   3  10   5   39.21    2.68
  -3 -10  -5   33.13    5.63
   3  10   5   32.65    3.20
   3 -10   5   32.65    2.84
  -3 -10  -5   35.61    3.47
   3  10   5   41.50    3.36
  -3 -10  -5   36.69    3.44
  -3 -10  -6  129.42   11.01
   3  10   6  130.24    7.31
   3 -10   6  138.44    7.03
  -3 -10  -6  133.51    7.58
   3  10   6  116.98    7.24
   3  10   6  136.99    6.63
   3  10   7   18.10    2.37
  -3 -10  -7   24.26    5.43
   3  10   7   13.53    2.58
   3 -10   7   18.53    2.63
  -3 -10  -7   22.41    2.93
   3  10   7   19.47    2.92
  -3 -10  -7   14.54    2.90
   3  10   8    6.00    1.93
  -3 -10  -8    5.42    4.76
   3  10   8    3.36    1.99
   3 -10   8    4.45    2.26
  -3 -10  -8   10.16    2.67
   3  10   8    6.76    2.56
  -3 -10  -8    4.09    2.65
  -3 -10  -9  141.06   12.70
   3  10   9  162.05    8.75
   3 -10   9  162.45    8.37
  -3 -10  -9  161.60    8.72
   3  10   9  145.35    8.07
   3  10   9  162.70    8.00
  -3 -10 -10   14.10    2.67
   3  10  10    9.02    2.74
   3  10  10   12.28    1.90
   3  10  10   14.32    2.28
   3 -10  10    9.86    2.56
   3  10  11   48.72    3.43
   3  10  11   46.13    3.08
   3 -10  11   49.38    3.73
  -3 -10 -12   20.92    2.78
   3  10  12   14.94    2.03
  -3 -10 -13   15.16    2.07
   3  10  13   17.97    1.72
   3 -11 -13    1.29    1.17
  -3 -11  13    2.16    1.40
  -3  11  13    4.28    1.29
   3 -11 -12   84.63    4.91
  -3 -11  12   78.79    4.90
  -3 -11  11    3.24    2.01
  -3 -11  11    0.34    2.11
   3 -11 -11    1.00    2.15
   3 -11 -10  146.72    8.17
  -3 -11  10  144.67    7.86
   3 -11  -9   -0.82    4.22
  -3  11   9   -0.64    2.12
   3 -11  -9    1.79    3.29
  -3 -11   9    4.65    2.37
  -3  11   8  143.41    7.90
  -3 -11   8  153.94    8.23
   3 -11  -8  137.16   12.23
   3 -11  -8  144.90   11.31
   3 -11  -7  209.96   14.39
  -3 -11   7  226.25   11.86
  -3  11   7  219.72   10.88
   3 -11  -7  227.14   15.75
   3 -11  -7  218.15   11.41
  -3 -11   6  887.31   39.43
   3 -11  -6  800.48   42.04
   3 -11  -6  865.74   39.18
  -3  11   6  892.61   38.43
   3 -11  -6  871.49   43.57
   3 -11  -6  891.75   39.27
  -3 -11   5  189.90   10.20
   3 -11  -5  185.45   10.02
  -3  11   5  196.50    9.32
   3 -11  -5  183.37   13.23
   3 -11  -5  180.41   10.10
   3 -11  -5  160.97   12.05
   3 -11  -4   92.09    5.85
   3 -11  -4   84.34    8.19
   3 -11  -4   88.53    6.11
  -3  11   4   91.63    5.20
   3 -11  -3   36.05    4.81
   3  11  -3   34.48    2.71
   3 -11  -3   26.78    3.23
   3 -11  -2  867.04   38.23
   3  11  -2  845.21   37.23
   3 -11  -2  857.63   37.32
   3  11  -1  155.25    8.43
  -3 -11   1  167.09    9.11
   3 -11  -1  176.88    9.37
   3 -11  -1  177.85    8.41
  -3 -11   0  202.07   10.39
   3  11   0  198.96    9.52
   3  11   0  204.71    9.82
   3 -11   0  196.20    9.47
   3 -11   0  191.17   10.51
   3  11   1   12.26    2.10
   3 -11   1   11.05    2.48
  -3 -11  -1   12.52    2.62
  -3 -11  -1   11.55    1.75
   3  11   1    8.04    1.61
  -3 -11  -2   16.23    3.21
   3  11   2   13.16    2.36
  -3 -11  -2   12.32    2.46
   3 -11   2   14.43    2.61
  -3 -11  -2   13.96    2.01
   3  11   2   15.94    1.99
   3 -11   3    0.90    2.05
  -3 -11  -3    7.26    3.14
  -3 -11  -3    4.75    1.85
   3  11   3    0.77    1.59
  -3 -11  -3    6.52    2.25
  -3 -11  -4  407.26   18.17
  -3 -11  -4  388.74   21.08
   3  11   4  381.93   17.55
   3 -11   4  374.12   18.23
  -3 -11  -4  370.62   17.85
   3  11   5   28.30    2.24
  -3 -11  -5   15.52    5.06
   3 -11   5   28.27    2.49
   3 -11   5   23.66    2.95
  -3 -11  -5   29.47    3.28
   3  11   5   26.27    2.79
   3  11   5   24.13    3.05
  -3 -11  -5   26.06    3.06
  -3 -11  -6    6.43    4.59
   3 -11   6    4.76    1.97
  -3 -11  -6   11.57    2.76
   3  11   6    7.51    2.42
   3  11   6   10.12    2.39
   3  11   6    9.87    1.95
   3  11   7   15.91    2.20
  -3 -11  -7    9.08    4.68
   3 -11   7   11.20    2.33
  -3 -11  -7   17.37    2.99
   3  11   7   10.72    2.59
   3  11   7   11.02    2.58
  -3 -11  -7    9.81    2.83
   3  11   8   66.89    4.08
  -3 -11  -8   60.92    8.16
   3 -11   8   73.30    4.58
  -3 -11  -8   68.21    4.91
   3  11   8   62.69    4.77
   3  11   8   63.64    4.54
  -3 -11  -8   66.18    5.24
  -3 -11  -9   93.33   10.27
   3 -11   9  114.78    6.40
   3  11   9  105.30    6.26
   3  11   9  127.83    6.11
   3  11   9  107.72    6.69
  -3 -11  -9  112.46    6.81
   3 -11  10  204.71    9.91
   3  11  10  196.33    9.55
   3  11  10  195.24   10.15
  -3 -11 -10  207.92   10.29
   3  11  11   23.43    2.36
   3 -11  11   26.76    2.66
   3  11  12    8.54    1.57
  -3 -11 -12   10.81    2.15
   3 -12 -12    6.13    1.58
  -3 -12  12    6.73    1.79
  -3 -12  11   47.86    3.46
   3 -12 -11   59.74    4.04
   3 -12 -10    9.36    2.51
  -3 -12  10    8.76    2.17
   3 -12  -9   10.71    2.78
  -3 -12   9    9.03    2.22
   3 -12  -8   36.34    3.81
  -3  12   8   36.57    3.30
   3 -12  -8   27.79    5.21
  -3 -12   8   43.51    3.66
   3 -12  -8   33.15    6.17
   3 -12  -7    7.50    4.47
  -3  12   7    6.63    2.12
  -3 -12   7    6.42    2.90
   3 -12  -7    6.03    3.80
   3 -12  -7    4.63    2.30
   3 -12  -6   26.64    5.01
   3 -12  -6   22.68    3.00
  -3 -12   6   25.15    3.57
   3 -12  -6   24.88    5.55
   3 -12  -6   18.68    3.12
  -3  12   6   21.91    2.65
   3 -12  -5    3.81    2.71
   3 -12  -5   12.47    4.22
  -3  12   5    8.85    2.02
  -3 -12   5   11.32    2.99
   3 -12  -5    9.47    2.51
   3 -12  -4  391.71   23.39
   3 -12  -4  444.25   21.11
  -3  12   4  417.85   19.79
  -3 -12   4  452.69   21.29
   3 -12  -4  454.29   20.30
  -3 -12   4  473.66   20.85
   3 -12  -3   49.38    3.73
   3 -12  -3   42.43    4.20
   3  12  -3   45.62    3.35
   3 -12  -2  105.84    5.97
   3 -12  -2  104.28    6.83
   3  12  -2  104.43    5.85
   3 -12  -1    6.98    1.71
   3  12  -1    3.87    1.88
   3 -12  -1    5.96    1.54
   3 -12  -1    7.31    2.42
   3  12   0  103.76    5.49
   3  12   0  103.60    5.83
   3 -12   0   94.61    5.41
  -3 -12   0  112.44    6.63
   3 -12   0   89.73    6.46
   3  12   1  123.24    6.78
   3  12   1  117.67    6.31
   3 -12   1  111.68    6.79
  -3 -12  -1  132.65    7.43
   3 -12   1  121.56    7.50
  -3 -12  -1  128.20    6.63
  -3 -12  -2   54.45    3.91
   3  12   2   50.36    4.09
  -3 -12  -2   61.88    4.61
   3 -12   2   53.85    4.65
   3  12   2   55.84    3.66
  -3 -12  -3    8.51    3.08
   3  12   3   12.23    2.46
  -3 -12  -3   14.05    2.73
  -3 -12  -3   10.77    2.17
   3  12   3   14.74    2.20
   3 -12   3    7.02    2.53
   3  12   4   57.61    3.80
  -3 -12  -4   43.54    5.78
  -3 -12  -4   46.51    4.18
   3 -12   4   54.85    4.48
  -3 -12  -4   49.43    4.05
   3  12   5  118.07    6.56
  -3 -12  -5  101.48    9.31
   3  12   5  119.23    6.86
  -3 -12  -5  125.70    7.12
   3 -12   5  104.29    6.91
  -3 -12  -5  110.43    6.82
   3  12   6  431.37   18.98
  -3 -12  -6  399.67   23.76
   3  12   6  424.72   19.76
   3 -12   6  448.12   19.31
  -3 -12  -6  412.45   20.13
   3  12   6  438.28   19.97
  -3 -12  -6  416.43   20.18
  -3 -12  -7   28.49    5.92
   3  12   7   34.50    3.31
   3 -12   7   36.36    3.05
   3  12   7   31.27    3.52
   3  12   7   33.88    2.80
  -3 -12  -7   40.58    3.94
  -3 -12  -8  118.31   11.20
  -3 -12  -8  140.77    8.07
   3  12   8  142.81    7.08
   3  12   8  138.93    7.71
   3  12   8  138.36    7.71
   3 -12   8  150.72    7.43
  -3 -12  -9  140.32    8.12
   3  12   9  156.09    7.35
   3  12   9  142.04    7.70
   3 -12   9  144.94    7.58
   3  12   9  152.12    8.01
  -3 -12 -10    1.81    1.92
   3  12  10    5.36    1.73
   3  12  10    5.94    2.21
   3  12  11   11.00    1.69
  -3 -12 -11   13.02    2.43
  -3 -12 -12   34.08    2.80
   3  12  12   29.46    2.05
  -3  13  12   15.94    1.48
   3 -13 -12   18.02    1.93
   3 -13 -11   29.75    2.85
  -3 -13  10   38.80    3.04
   3 -13 -10   50.15    3.78
   3 -13  -9   28.09    3.19
  -3 -13   9   20.84    2.52
  -3  13   8    3.32    1.83
  -3 -13   8    2.45    1.91
  -3 -13   7    1.31    2.55
   3 -13  -7    1.62    2.18
  -3 -13   7    3.51    2.15
   3 -13  -7    4.23    4.05
  -3  13   7    1.09    1.78
  -3 -13   6  285.87   13.66
   3 -13  -6  279.15   13.32
   3 -13  -6  250.81   16.85
   3 -13  -6  260.60   13.69
  -3  13   6  259.29   12.64
  -3  13   5   13.92    2.21
   3 -13  -5   12.91    2.93
   3 -13  -5   11.31    2.57
   3 -13  -5   10.74    4.01
  -3 -13   5   18.63    3.04
  -3  13   4  194.48    9.99
   3 -13  -4  208.76   10.62
  -3 -13   4  227.33   11.09
   3 -13  -4  210.90   11.47
  -3 -13   4  219.51   11.54
   3  13  -3    6.78    1.83
   3 -13  -3    9.21    2.45
   3 -13  -3    7.37    2.80
  -3  13   3    9.46    1.89
  -3 -13   3   11.25    3.17
   3 -13  -2   34.01    3.16
   3  13  -2   32.33    2.90
   3 -13  -2   31.59    3.29
   3 -13  -2   28.48    3.72
   3 -13  -1  447.13   20.34
   3  13  -1  453.12   20.44
   3  13  -1  440.13   20.09
   3 -13  -1  447.19   20.47
   3 -13  -1  467.86   21.60
   3 -13  -1  450.71   20.20
   3 -13   0  237.51   11.93
   3  13   0  234.59   11.43
   3  13   0  259.09   11.96
  -3 -13   0  253.23   12.62
   3 -13   0  242.14   11.55
  -3 -13  -1   18.36    3.23
   3  13   1   16.72    2.62
   3 -13   1   14.29    2.80
  -3 -13  -1   16.99    2.28
   3  13   1   10.56    1.97
   3 -13   1   18.84    3.21
   3  13   2  445.79   21.25
   3  13   2  496.54   21.81
  -3 -13  -2  504.61   22.41
   3 -13   2  497.50   22.80
  -3 -13  -2  470.06   21.64
   3  13   3   19.13    2.49
   3  13   3   21.91    3.10
  -3 -13  -3   28.07    3.54
  -3 -13  -3   20.54    2.79
   3 -13   3   22.79    3.34
  -3 -13  -4  100.67    8.65
   3  13   4  106.91    6.22
  -3 -13  -4  117.28    7.11
   3 -13   4  121.22    7.19
  -3 -13  -4  115.41    6.78
  -3 -13  -5    7.92    3.56
  -3 -13  -5    3.26    2.62
   3  13   5    4.10    2.11
  -3 -13  -5    3.01    2.36
   3 -13   5    1.15    2.16
   3  13   5    3.58    2.47
  -3 -13  -6   19.11    3.18
  -3 -13  -6   16.90    3.12
   3  13   6   19.41    2.65
   3  13   6   16.95    3.01
  -3 -13  -6   26.22    5.16
  -3 -13  -7    1.68    2.48
   3  13   7    1.24    2.06
   3 -13   7    0.96    1.57
   3  13   7    0.86    2.32
  -3 -13  -7    0.63    3.52
   3  13   8  198.23    9.99
  -3 -13  -8  203.90   10.41
   3  13   8  192.25    9.87
   3  13   9   43.00    2.88
   3  13   9   39.43    3.23
  -3 -13  -9   43.81    3.80
   3  13   9   40.22    3.36
  -3 -13 -10   11.49    2.23
   3  13  10   11.04    1.62
  -3 -13 -11    2.73    1.89
   3 -14 -11   88.13    4.75
  -3 -14  11   76.65    4.39
  -3 -14  10   57.83    3.85
   3 -14 -10   63.45    4.22
  -3 -14   9   61.78    3.86
   3 -14  -9   70.60    4.71
  -3 -14   8    1.57    1.79
  -3  14   7   31.41    2.74
   3 -14  -7   27.17    3.33
   3 -14  -7   25.98    3.24
  -3 -14   7   22.64    2.61
  -3 -14   7   28.00    3.33
   3 -14  -6    5.66    2.48
   3 -14  -6    5.23    2.42
  -3  14   6    7.25    1.94
  -3 -14   6    7.30    2.45
   3 -14  -5    4.89    2.38
   3 -14  -5    6.56    2.93
  -3  14   5    5.86    1.78
   3 -14  -5    5.65    2.74
  -3 -14   5    5.18    2.57
  -3  14   4  123.28    6.74
   3 -14  -4  141.80    7.63
   3 -14  -4  133.80    7.47
  -3 -14   4  138.96    7.84
   3 -14  -4  126.47    8.16
   3 -14  -3    6.17    2.23
   3 -14  -3    5.13    2.45
  -3 -14   3   11.61    3.30
   3  14  -3    5.24    1.94
   3 -14  -3    7.33    2.83
   3 -14  -2    5.44    2.67
   3  14  -2    6.86    2.12
  -3 -14   2    3.85    2.83
   3 -14  -2    8.53    2.38
   3 -14  -2   10.83    2.17
   3 -14  -2    7.44    2.10
   3  14  -2    7.67    1.96
   3  14  -1   10.20    2.34
   3 -14  -1   13.04    2.20
   3 -14  -1    8.87    2.46
   3  14  -1   12.37    1.98
   3  14   0  106.67    5.71
   3 -14   0  101.24    6.28
   3  14   0  104.32    6.21
  -3 -14  -1  153.35    8.71
   3  14   1  137.64    7.40
   3  14   1  160.16    8.14
  -3 -14  -1  143.08    7.67
   3 -14   1  149.70    9.04
  -3 -14  -2  398.22   18.09
   3  14   2  359.75   16.85
   3  14   2  370.20   17.41
  -3 -14  -2  362.77   17.20
   3 -14   2  379.29   18.34
  -3 -14  -3   80.13    5.95
   3  14   3   92.83    5.16
   3  14   3   90.12    5.80
   3 -14   3   80.47    6.11
  -3 -14  -3   87.08    5.51
   3  14   4    4.34    2.07
  -3 -14  -4    2.26    2.75
  -3 -14  -4    3.00    2.37
   3 -14   4    2.96    2.54
  -3 -14  -5   58.99    4.82
   3  14   5   59.99    4.17
   3  14   5   65.11    4.77
  -3 -14  -5   57.79    4.57
   3 -14   5   60.75    4.71
  -3 -14  -6   21.27    3.27
   3  14   6   23.96    3.16
   3  14   6   23.31    2.76
  -3 -14  -7   95.72    6.25
   3  14   7   98.55    5.97
   3  14   7   95.07    5.58
  -3 -14  -8   48.78    4.05
   3  14   8   44.19    3.65
   3  14   8   46.77    3.45
  -3 -14  -9   15.39    2.49
   3  14   9   15.70    2.16
   3  14   9   11.22    1.95
  -3 -14 -10   -0.39    1.55
  -3 -14 -10    1.83    2.04
  -3 -14 -11   15.91    2.13
  -3 -15  10    3.91    1.41
   3 -15 -10    5.17    1.78
  -3 -15   9   31.28    2.68
  -3 -15   7   22.04    2.33
   3 -15  -7   27.06    3.12
   3 -15  -7   25.39    3.05
   3 -15  -7   23.68    3.08
  -3 -15   6   32.54    2.83
   3 -15  -6   33.41    3.59
   3 -15  -6   31.38    3.59
  -3 -15   6   37.90    3.47
   3 -15  -6   35.61    3.46
   3 -15  -5   92.34    5.87
   3 -15  -5   85.53    5.76
  -3 -15   5   93.90    5.89
   3 -15  -5   91.20    6.32
   3 -15  -4   50.61    4.64
   3 -15  -4   45.37    4.11
   3 -15  -4   42.50    3.99
   3 -15  -4   55.50    4.05
  -3 -15   4   49.96    4.19
   3  15  -3    1.59    1.80
   3 -15  -3    0.54    2.76
   3 -15  -3    3.93    2.04
   3 -15  -3    7.13    2.37
   3 -15  -3    3.37    2.44
  -3 -15   3    4.68    3.10
  -3 -15   3    4.99    2.41
   3  15  -3    0.64    1.69
   3  15  -2  186.32    9.49
   3  15  -2  192.74    9.29
  -3 -15   2  210.38   10.77
   3 -15  -2  186.70    9.73
   3 -15  -2  190.36    9.80
   3 -15  -2  184.50    9.47
   3 -15  -2  191.64   10.79
  -3 -15   1  110.35    6.68
   3  15  -1   94.39    5.28
   3 -15  -1   93.17    6.75
   3  15  -1   95.14    5.68
   3 -15  -1   86.57    5.85
   3 -15   0    7.97    2.58
   3  15   0    9.21    2.49
   3  15   0    5.51    1.83
   3 -15   0    6.37    3.20
   3  15   1   44.05    3.32
   3  15   1   47.28    4.02
  -3 -15  -1   45.08    4.62
   3 -15   1   44.74    4.61
   3  15   2   46.99    3.40
   3  15   2   49.17    4.13
  -3 -15  -2   43.61    4.59
   3 -15   2   42.14    4.60
   3  15   3  188.08    9.51
   3  15   3  206.53   10.21
  -3 -15  -3  187.96   10.56
   3 -15   3  201.10   10.80
   3  15   4   89.84    5.25
   3  15   4   99.11    6.03
  -3 -15  -4   85.94    6.19
   3 -15   4   86.13    6.02
  -3 -15  -5   33.56    3.87
   3  15   5   31.07    2.93
   3 -15   5   31.92    3.32
  -3 -15  -6   24.99    3.41
   3  15   6   25.20    3.21
   3  15   6   30.07    2.76
  -3 -15  -7    2.35    2.31
   3  15   7    2.27    2.26
   3  15   7    4.00    1.78
  -3 -15  -8   24.71    3.04
   3  15   8   27.87    2.71
   3  15   8   25.46    2.35
  -3 -15  -9    4.37    1.86
   3  15   9    2.09    1.47
  -3 -15 -10  182.11    8.72
  -3 -15 -10  164.93    8.28
   3 -16  -9   71.69    4.25
   3 -16  -9   80.75    4.51
  -3 -16   9   71.42    4.09
   3 -16  -8   27.45    2.66
   3 -16  -8   29.34    2.74
   3 -16  -8   26.84    2.81
   3 -16  -7    5.15    2.14
   3 -16  -7    0.70    1.82
   3 -16  -7    2.95    1.89
   3 -16  -7    4.91    2.01
   3 -16  -6   16.13    2.60
  -3 -16   6   17.29    2.48
   3 -16  -6   19.68    2.90
   3 -16  -6   15.47    2.64
   3 -16  -6   11.95    2.69
   3 -16  -5  157.78    8.28
   3 -16  -5  149.17    8.73
   3 -16  -5  155.49    8.14
   3 -16  -5  153.83    8.14
  -3 -16   5  143.44    8.06
   3 -16  -4   38.39    3.59
   3 -16  -4   33.53    3.90
   3 -16  -4   40.28    3.74
   3 -16  -4   40.45    3.44
  -3 -16   4   34.91    3.51
  -3 -16   3   28.22    3.31
   3 -16  -3   37.32    3.36
  -3 -16   3   40.32    4.13
   3 -16  -3   30.18    3.49
   3 -16  -3   23.31    3.62
   3 -16  -3   31.49    3.05
   3 -16  -2   19.84    3.10
   3  16  -2   23.21    2.54
   3 -16  -2   21.53    3.74
  -3 -16   1   96.69    6.21
   3 -16  -1   79.66    5.39
   3 -16  -1   77.54    6.22
   3  16  -1   81.93    5.14
  -3 -16   0   21.83    3.52
   3 -16   0   18.48    3.57
   3  16   0   24.08    2.86
   3 -16   1   11.06    3.16
  -3 -16  -1   12.84    3.10
   3  16   1   12.24    2.66
   3  16   2   16.92    2.88
   3 -16   2   17.76    3.42
  -3 -16  -2   16.24    3.28
  -3 -16  -3  368.45   17.48
   3 -16   3  346.16   17.46
   3  16   3  358.21   16.81
   3  16   4   28.87    3.30
  -3 -16  -4   26.06    3.60
   3 -16   4   25.92    3.32
  -3 -16  -5  191.18   10.26
   3  16   6   14.33    2.62
  -3 -16  -6   11.94    2.85
   3  16   7  148.97    7.77
  -3 -16  -7  156.58    8.29
  -3 -16  -7  149.30    7.73
  -3 -16  -8   26.80    2.94
  -3 -16  -8   22.74    2.69
   3  16   8   19.67    2.26
  -3 -16  -9    3.92    1.82
  -3 -16  -9    2.30    1.53
   3 -17  -8   21.48    2.16
   3 -17  -8   23.01    2.21
   3 -17  -8   22.11    2.28
  -3 -17   8   19.90    1.90
   3 -17  -7    5.59    1.88
   3 -17  -7    2.54    1.55
   3 -17  -7    4.95    1.69
   3 -17  -7    4.42    1.82
   3 -17  -6   34.57    3.02
   3 -17  -6   26.06    2.98
   3 -17  -6   31.30    2.83
   3 -17  -6   28.26    2.85
   3 -17  -5    1.23    1.87
   3 -17  -5    0.64    2.09
   3 -17  -5    3.53    1.86
  -3 -17   5    0.41    1.74
   3 -17  -5    0.15    2.05
  -3 -17   4  135.75    7.04
   3 -17  -4  119.50    7.62
   3 -17  -4  126.82    7.12
   3 -17  -3   -0.65    2.30
  -3 -17   3    2.89    2.12
   3 -17  -3    2.94    2.72
   3  17  -2    4.02    1.75
  -3 -17   2    4.80    2.82
   3 -17  -2    4.27    2.46
   3 -17  -2    8.08    2.76
  -3 -17   2    4.83    2.28
   3  17  -1    0.81    1.86
  -3 -17   1    0.66    2.59
  -3 -17   0  104.06    6.45
   3 -17   0   82.25    6.44
   3  17   0   94.14    5.55
  -3 -17  -1    1.53    2.74
   3 -17   1    0.51    2.59
   3  17   1    2.90    2.19
   3 -17   2   58.96    5.04
  -3 -17  -2   68.29    5.09
   3  17   2   64.92    4.62
   3  17   3    2.83    2.34
   3 -17   3    3.36    2.46
   3 -17   4   42.92    3.88
   3  17   4   49.12    3.94
  -3 -17  -4   50.48    4.17
  -3 -17  -5   74.11    5.20
  -3 -17  -6   20.14    2.57
   3  17   6   13.76    2.28
  -3 -17  -6   13.62    2.60
  -3 -17  -6   18.83    2.54
  -3 -17  -7   -0.84    1.27
  -3 -17  -7    1.19    1.87
  -3 -17  -7    1.23    1.97
   3  17   7    1.45    1.61
  -3 -17  -8    2.40    1.64
   3  17   8    2.34    1.29
   3 -18  -7   14.17    1.80
   3 -18  -7    9.96    1.52
   3 -18  -6   -0.68    1.63
   3 -18  -6   -1.33    1.69
   3 -18  -5  108.78    5.83
   3 -18  -5   97.07    6.15
  -3 -18   4   34.33    2.82
   3 -18  -4   37.02    3.28
   3 -18  -4   31.45    3.43
  -3 -18   3   33.27    2.96
   3 -18  -3   31.42    3.16
   3 -18  -3   35.23    3.64
  -3 -18   2    2.43    1.84
   3 -18  -2    2.28    2.44
  -3 -18   1   19.67    2.62
  -3 -18   1   26.94    3.26
   3  18  -1   21.91    2.40
  -3 -18   0   -0.20    2.54
   3  18   0    0.39    1.74
   3 -18   0    1.17    2.52
  -3 -18  -1   44.96    4.09
   3 -18   1   39.21    4.05
   3  18   1   43.13    3.49
  -3 -18  -2   15.46    3.00
   3  18   2   18.73    2.67
   3 -18   2   19.58    3.00
  -3 -18  -3   84.50    5.53
   3  18   3   82.51    5.03
   3 -18   3   82.12    5.43
   3  18   4   29.49    2.88
  -3 -18  -4   28.22    3.30
  -3 -18  -5   28.91    3.02
  -3 -18  -6  110.19    5.88
   3  18   6  110.95    5.86
   3  18   7   14.97    1.78
   3 -19  -6   27.91    2.17
   3 -19  -6   20.90    2.08
   3 -19  -5    2.89    1.46
   3 -19  -5    4.11    1.69
   3 -19  -4   27.08    2.88
  -3 -19   3    3.22    1.80
   3 -19  -3   -0.55    1.88
   3 -19  -2   45.31    3.93
   3  19  -1   18.89    2.01
  -3 -19   1   21.26    2.77
  -3 -19   0   51.96    3.90
   3 -19   0   40.48    3.87
   3  19   0   42.56    3.14
  -3 -19   0   45.86    3.24
   3  19   1    3.09    1.74
   3 -19   1    1.74    2.14
  -3 -19  -1    3.22    2.14
   3  19   2    2.82    1.78
  -3 -19  -2    5.07    2.06
   3 -19   2    1.96    1.89
   3  19   3  102.50    5.87
  -3 -19  -3  119.89    6.40
   3  19   4   24.31    2.44
  -3 -19  -4   28.34    2.85
  -3 -19  -4   26.74    2.73
   3  19   5   25.07    2.32
  -3 -19  -5   24.44    2.52
  -3 -19  -5   27.82    2.58
   3 -20  -4   27.66    2.49
   3 -20  -3   57.60    3.92
   3 -20  -2    6.37    1.98
  -3 -20   2    4.36    1.78
  -3 -20   1   15.73    2.29
   3 -20   0    2.90    1.76
   3  20   0    0.71    1.16
  -3 -20  -1   23.57    2.54
   3 -20   1   23.78    2.67
  -3 -20  -1   27.50    2.72
   3  20   1   24.27    2.14
  -3 -20  -2   70.18    4.25
   3 -20   2   58.86    4.07
  -3 -20  -2   69.80    4.33
   3  20   2   65.90    3.81
   3  20   3    7.92    1.57
  -3 -20  -3   10.65    1.86
  -3 -20  -3    8.46    1.78
   4   0 -15    2.07    1.86
  -4   0  14   30.00    2.96
   4   0 -14   30.19    3.55
  -4   0  13    1.81    2.35
   4   0 -13    1.44    2.92
  -4   0  12   33.69    3.92
   4   0 -12   41.76    5.05
  -4   0  11   -3.98    5.92
   4   0 -11    2.32    3.49
  -4   0  10  106.45    9.15
   4   0 -10  138.49    8.57
  -4   0  10   94.28   11.22
  -4   0  10  122.14    6.66
   4   0  -9    0.31    2.77
  -4   0   9   -0.92    1.42
  -4   0   9   -1.85    4.36
  -4   0   9   -0.48    3.76
  -4   0   9    1.50    1.74
  -4   0   9   -0.14    1.73
   4   0  -8  922.83   40.79
  -4   0   8  909.55   39.21
  -4   0   8  909.28   38.84
  -4   0   8  901.97   39.18
  -4   0   7    0.23    1.42
   4   0  -7    0.52    2.19
  -4   0   7   -0.82    3.58
  -4   0   7    0.12    1.45
  -4   0   6   97.15    4.95
  -4   0   6   75.79    5.34
  -4   0   6   77.78    8.69
  -4   0   5    1.46    3.50
  -4   0   5   -0.37    1.53
   4   0  -5    0.27    1.06
  -4   0   5   -0.30    2.26
  -4   0   4  340.39   16.15
   4   0  -4  335.98   14.20
  -4   0   4  281.80   14.91
  -4   0   4  274.44   18.66
  -4   0   3   -0.23    1.86
  -4   0   3    2.57    2.54
   4   0  -3    0.50    0.87
  -4   0   2  621.44   25.42
  -4   0   2  412.61   27.50
   4   0  -1    0.45    2.46
  -4   0   1    1.96    1.38
   4   0   0  134.51    9.18
   4   0   1   -0.40    2.33
   4   0   2   24.14    1.78
   4   0   2   22.20    3.54
   4   0   3    1.51    1.02
   4   0   3    1.73    2.35
   4   0   3    0.34    2.20
   4   0   4  340.38   18.46
   4   0   4  349.92   15.79
   4   0   4  375.18   16.11
   4   0   5    2.31    1.59
   4   0   5    0.55    1.22
   4   0   5   -0.40    2.86
   4   0   5    2.58    1.33
   4   0   6    5.52    1.97
   4   0   6    6.92    1.54
   4   0   6    6.29    3.34
   4   0   6    5.08    1.54
   4   0   7    1.91    1.67
   4   0   7    0.32    1.85
   4   0   7   -1.01    3.35
   4   0   7    0.67    1.99
   4   0   7   -1.08    1.64
   4   0   7   -0.64    1.56
   4   0   8   99.30    6.29
   4   0   8   90.80    8.82
   4   0   8  111.46    5.98
   4   0   8  112.58    6.31
   4   0   8  105.42    5.78
   4   0   8  112.02    6.08
   4   0   9    2.11    2.08
   4   0   9   -1.17    2.21
   4   0   9    1.25    4.24
   4   0   9    0.33    2.55
   4   0   9    0.24    1.94
   4   0   9    1.25    1.98
   4   0  10  237.03   13.22
   4   0  10  266.61   12.98
   4   0  10  257.97   17.16
   4   0  10  293.18   13.46
   4   0  10  281.91   12.77
   4   0  11    0.40    2.38
   4   0  11   -1.14    3.03
   4   0  11    1.00    2.25
   4   0  11   -2.08    4.57
   4   0  11    3.09    2.55
   4   0  12   70.04    4.36
   4   0  12   78.52    5.32
   4   0  13    0.46    2.19
   4   0  13    1.56    1.90
   4   0  13   -1.53    1.61
   4   0  13    2.02    1.67
   4   0  14    4.87    1.50
   4   1 -15   85.02    5.16
   4   1 -14   38.15    3.89
  -4   1  14   30.86    2.46
  -4   1  14   35.30    3.19
   4   1 -13    8.97    3.18
  -4   1  13    9.43    2.73
  -4   1  12    3.71    4.83
  -4  -1  12    0.91    4.70
   4   1 -12    5.67    3.29
  -4   1  12    5.54    2.59
  -4  -1  11   45.65    3.58
  -4  -1  11   36.87    2.90
   4   1 -11   35.58    4.83
  -4   1  11   38.47    5.76
  -4   1  11   35.39    7.64
  -4  -1  10    7.82    2.26
  -4   1  10   10.90    2.11
   4   1 -10    9.61    3.32
  -4  -1  10    7.90    1.81
  -4   1  10    7.85    5.50
   4   1  -9  184.50   10.92
  -4  -1   9  178.37   12.05
  -4  -1   9  186.09    9.07
  -4  -1   9  184.21    9.14
  -4   1   9  189.28    9.55
  -4  -1   9  194.78    9.51
  -4   1   9  194.22    9.28
  -4   1   9  162.30   14.20
  -4   1   8  139.98   12.65
  -4   1   8  161.66    8.12
  -4  -1   8  146.81    7.66
  -4  -1   8  172.04   10.71
   4   1  -8  159.94    9.39
  -4  -1   8  158.10    7.99
  -4   1   8  153.04    7.76
  -4   1   7  505.32   30.29
  -4   1   7  571.22   25.10
  -4  -1   7  560.08   24.73
  -4  -1   7  515.37   27.22
   4   1  -7  592.48   26.34
  -4   1   7  571.82   24.78
  -4  -1   6   52.26    5.25
  -4   1   6   47.34    7.06
  -4   1   6   51.61    3.49
  -4  -1   6   50.72    3.07
  -4   1   6   43.42    3.82
  -4   1   6   50.09    3.08
  -4  -1   5  583.63   23.60
   4   1  -5  529.93   23.40
   4  -1  -5  523.52   23.40
  -4  -1   5  557.11   25.68
  -4   1   5  494.24   24.16
  -4   1   5  481.56   28.43
  -4  -1   4   97.33    4.54
  -4  -1   4   86.62    6.10
   4   1  -4   83.67    4.39
   4  -1  -4   87.32    4.40
  -4   1   4   65.70    4.95
  -4   1   4   64.08    7.68
   4  -1  -3  375.37   16.61
   4   1  -3  378.66   16.58
   4   1  -3  386.55   16.65
  -4  -1   3  379.84   18.16
  -4   1   3  365.75   18.05
  -4   1   3  333.14   20.89
  -4  -1   2   44.57    3.68
  -4   1   2   40.20    3.46
  -4   1   2   34.57    5.09
   4  -1  -2   45.41    2.58
  -4  -1   1  610.09   28.38
  -4   1   1  628.92   28.25
   4   1  -1  701.00   31.30
   4   1   0  110.30    8.00
   4   1   1   12.43    2.95
   4  -1   2  563.06   24.37
   4   1   2  572.44   24.37
   4   1   2  577.61   27.60
   4   1   2  554.35   24.34
   4   1   3  137.69    9.60
   4   1   3  140.09    9.18
   4  -1   3  148.73    6.83
   4  -1   4   16.24    1.57
   4   1   4   16.13    1.88
   4   1   4   15.27    3.32
   4   1   4   16.98    1.58
   4   1   4   16.83    1.62
   4   1   5 1060.85   44.48
   4   1   5 1027.54   44.58
   4   1   5 1108.96   44.89
   4   1   5  998.93   44.50
   4  -1   5 1028.88   44.45
   4   1   5 1010.84   47.62
   4   1   6  262.60   12.69
   4  -1   6  270.96   12.73
   4   1   6  294.34   16.14
   4   1   6  309.51   13.13
   4   1   6  277.21   12.68
   4  -1   6  276.90   12.56
   4   1   7   18.40    2.30
   4  -1   7   21.82    2.22
   4   1   7   15.05    4.19
   4  -1   7   16.21    2.20
   4   1   7   17.97    2.13
   4  -1   7   16.83    2.41
   4   1   7   17.59    2.45
   4   1   7   16.80    2.47
   4   1   7   18.02    2.19
   4  -1   7   17.64    2.06
   4   1   8    7.58    2.18
   4  -1   8    9.56    2.02
   4   1   8   11.23    4.34
   4   1   8   12.63    2.26
   4  -1   8   10.10    2.09
   4   1   8    7.27    2.16
   4  -1   8    9.69    2.38
   4  -1   8    8.03    1.98
   4   1   8    8.36    2.05
   4   1   8    9.06    2.37
   4  -1   9   16.86    2.53
   4   1   9   15.31    2.57
   4  -1   9   11.03    2.77
   4   1   9   12.20    2.66
   4   1   9   10.56    4.88
   4   1   9   12.14    2.93
   4  -1   9   10.59    2.32
   4   1   9   15.20    2.52
   4  -1   9   14.43    2.57
   4   1   9   16.35    2.56
   4  -1  10   34.31    3.63
   4   1  10   35.79    3.62
   4   1  10   45.60    3.73
   4   1  10   41.96    4.21
   4   1  10   38.77    3.47
   4  -1  10   39.40    3.29
   4   1  10   36.76    6.55
   4  -1  10   35.01    3.79
   4   1  10   35.99    3.62
   4   1  11  364.20   19.48
   4  -1  11  377.28   19.72
   4  -1  11  440.12   19.06
   4   1  11  488.39   20.06
   4   1  11  441.69   19.24
   4   1  11  427.52   24.13
   4   1  11  427.01   19.50
   4  -1  12   26.88    2.61
   4   1  12   29.46    2.98
   4   1  12   22.36    2.99
   4  -1  12   21.12    3.14
   4  -1  12   26.24    2.59
   4   1  13   17.99    2.89
   4  -1  13   18.78    2.05
   4   1  13   16.47    2.20
   4  -1  13   19.26    2.01
   4   1  13   16.95    2.34
   4   1  13   16.28    2.30
   4  -1  13   19.88    2.62
   4   1  14    1.76    1.26
   4   1  14    2.90    1.37
   4  -1  14    2.49    1.50
   4   2 -15   36.40    2.98
   4  -2 -15   34.19    3.08
  -4   2  14   15.62    2.29
  -4  -2  14   14.62    2.30
   4   2 -14   12.28    2.77
  -4   2  14   14.34    1.93
   4   2 -13   10.34    3.18
  -4   2  13    5.88    2.57
  -4  -2  13    7.15    2.49
  -4   2  12  277.83   13.98
  -4  -2  12  271.34   13.93
   4   2 -12  285.94   14.81
  -4  -2  12  283.33   12.95
  -4  -2  11   58.29    6.59
  -4   2  11   46.37    6.27
  -4   2  11   67.12    9.15
  -4  -2  11   51.73    8.42
   4   2 -11   44.74    5.26
   4  -2 -11   54.23    5.54
  -4  -2  11   59.22    4.26
  -4  -2  11   54.45    3.67
  -4  -2  10  105.32    5.98
  -4  -2  10   97.22   10.94
  -4   2  10  114.02   11.64
   4  -2 -10  112.23    7.78
   4   2 -10  110.55    7.70
  -4  -2  10  108.02    6.43
  -4   2  10  118.25    6.67
  -4   2   9   91.15    9.70
   4   2  -9   87.33    6.44
   4  -2  -9   79.73    6.39
  -4   2   9   84.92    5.44
  -4  -2   9   78.91    4.83
  -4  -2   9   84.50    5.29
  -4   2   9   86.49    4.88
  -4   2   8    6.79    2.19
  -4  -2   8    5.91    1.53
  -4   2   8    4.91    4.20
  -4  -2   8    5.65    4.46
  -4  -2   8    2.18    3.28
   4   2  -8    9.82    2.90
   4  -2  -8    4.17    2.67
  -4  -2   8    7.33    1.98
  -4   2   8    6.77    1.66
  -4  -2   7   17.41    1.79
  -4  -2   7   18.27    3.77
  -4   2   7   19.99    1.97
  -4   2   7   15.77    2.51
  -4   2   7   23.00    5.53
  -4  -2   7   13.61    4.86
   4   2  -7   19.27    3.04
   4  -2  -7   16.17    2.93
   4  -2  -6   27.88    3.41
   4   2  -6   30.49    2.47
  -4  -2   6   24.18    4.12
  -4   2   6   41.07    2.44
  -4   2   6   29.58    2.81
  -4   2   6   30.50    2.99
  -4  -2   6   23.78    2.86
  -4  -2   6   26.76    2.12
  -4  -2   6   27.17    2.47
  -4  -2   6   30.03    5.64
  -4   2   6   35.36    5.88
   4   2  -5  327.37   14.50
  -4  -2   5  331.51   14.71
  -4  -2   5  312.13   14.29
  -4   2   5  312.98   15.24
  -4  -2   5  322.33   15.23
   4  -2  -5  325.52   15.65
  -4   2   5  331.79   19.62
  -4  -2   5  346.48   19.69
  -4  -2   5  321.56   16.60
   4   2  -4  229.41   10.38
   4  -2  -4  213.96   10.38
  -4  -2   4  236.04   10.60
   4   2  -4  232.59   10.36
  -4  -2   4  221.33   11.14
  -4   2   4  234.95   11.22
  -4   2   4  229.74   14.90
  -4  -2   4  231.89   14.94
  -4  -2   4  221.50   12.14
  -4  -2   3    0.72    1.66
  -4   2   3    2.95    3.03
  -4  -2   3    1.78    2.74
   4   2  -3    1.58    0.91
   4  -2  -3    0.76    0.90
   4   2  -3    0.77    0.90
  -4  -2   2 1165.77   50.38
  -4   2   2 1091.82   50.08
   4  -2  -2 1173.33   48.95
  -4   2   2 1083.25   53.30
  -4  -2   2 1132.81   53.57
  -4  -2   1  439.97   21.51
   4   2  -1  506.15   23.93
   4  -2  -1  503.00   23.90
  -4   2   1  458.58   21.15
   4   2   0  987.43   45.04
   4  -2   0  972.69   44.90
   4   2   1  337.74   17.77
   4  -2   1  340.41   17.75
   4   2   2   26.65    2.01
   4   2   2   32.65    2.12
   4  -2   2   28.62    4.04
   4   2   2   31.32    4.06
   4   2   3   75.67    4.07
   4  -2   3   77.60    3.98
   4   2   3   79.65    4.12
   4  -2   3   76.52    4.04
   4  -2   3   87.18    6.84
   4   2   3   80.37    6.66
   4   2   3   91.49    6.49
   4  -2   3   75.93    6.13
   4   2   4   30.53    2.15
   4   2   4   28.49    2.11
   4  -2   4   30.64    2.14
   4   2   4   26.25    3.82
   4  -2   4   31.29    2.10
   4   2   4   31.37    2.38
   4  -2   4   29.40    2.41
   4   2   4   26.43    2.17
   4  -2   4   27.63    4.11
   4   2   5    3.87    1.27
   4  -2   5    2.57    1.23
   4   2   5    6.30    1.67
   4  -2   5    4.38    1.55
   4  -2   5    3.20    2.89
   4   2   5    3.58    2.72
   4   2   5    4.58    1.18
   4   2   6 1464.70   64.61
   4   2   6 1487.91   64.43
   4  -2   6 1450.62   64.40
   4   2   6 1663.77   65.03
   4  -2   6 1636.26   65.01
   4   2   6 1479.12   67.99
   4  -2   6 1423.39   67.85
   4   2   7    3.02    1.71
   4  -2   7    4.44    1.94
   4   2   7    2.62    1.78
   4  -2   7    4.92    1.57
   4   2   7    2.27    1.59
   4  -2   7    4.08    1.75
   4  -2   7    4.91    1.63
   4   2   7    2.43    2.01
   4  -2   7    2.16    1.95
   4   2   7    5.96    3.52
   4  -2   7    4.97    3.67
   4   2   8   65.42    7.36
   4  -2   8   67.81    7.53
   4  -2   8   72.15    5.00
   4   2   8   64.81    4.68
   4   2   8   77.42    4.90
   4  -2   8   78.83    4.55
  -4  -2  -8   77.66    4.98
   4   2   8   70.18    4.53
   4   2   8   84.90    5.01
   4  -2   8   74.48    4.91
   4   2   8   66.32    4.47
   4  -2   8   73.94    4.28
   4   2   9    9.62    2.50
   4  -2   9    2.46    3.84
   4   2   9    7.35    4.24
   4   2   9    7.47    2.36
   4  -2   9    5.87    2.60
   4  -2   9    6.33    2.00
   4   2   9    5.87    2.41
   4   2   9    7.44    2.70
   4  -2   9    3.65    2.57
   4   2   9    6.30    2.31
   4  -2  10    2.28    2.61
   4   2  10    4.04    2.18
   4   2  10    5.43    2.60
   4   2  10    3.83    2.56
   4   2  10    4.93    2.88
   4  -2  10    3.01    2.90
   4   2  10    4.27    2.41
   4  -2  10    6.47    2.08
   4   2  10    9.82    4.56
   4  -2  10    0.66    4.15
   4   2  11   40.43    3.60
   4  -2  11   34.54    4.03
   4  -2  11   42.00    3.20
   4  -2  11   40.42    6.75
   4   2  11   50.90    4.34
   4  -2  11   51.91    4.53
   4   2  11   40.98    3.67
   4   2  11   30.70    6.09
   4  -2  11   39.08    3.19
   4   2  11   42.64    3.85
   4   2  12  323.40   16.75
   4  -2  12  344.32   17.27
   4  -2  12  358.67   16.39
   4   2  12  410.09   17.40
   4  -2  12  407.27   17.42
   4   2  12  383.17   16.84
   4  -2  12  364.38   16.47
   4   2  12  370.66   17.06
   4   2  13   13.94    2.30
   4   2  13   14.71    2.03
   4  -2  13   16.06    2.62
   4   2  13   17.88    2.71
   4  -2  13   14.95    2.61
   4   2  14   14.99    1.82
   4   2  14   20.96    1.99
   4  -2  14   16.04    2.06
   4  -3 -14   13.46    2.72
   4   3 -14   14.01    2.58
  -4   3  14   11.94    1.94
  -4   3  14   18.58    2.39
  -4  -3  14   16.79    2.21
   4   3 -13   32.39    3.96
  -4   3  13   34.22    3.36
  -4  -3  13   38.98    3.45
  -4  -3  12   16.92    2.74
  -4  -3  12   19.82    2.26
   4   3 -12   20.30    3.74
   4  -3 -12   13.45    3.47
  -4   3  12   22.68    3.17
  -4  -3  12   17.18    3.02
   4   3 -11   13.14    3.56
   4  -3 -11   11.33    3.54
  -4  -3  11   11.28    4.06
  -4  -3  11   11.09    2.88
  -4  -3  11   17.52    2.78
  -4   3  11   12.94    5.82
  -4  -3  11   13.22    5.78
  -4  -3  11   10.88    2.20
  -4  -3  10  181.62   12.21
   4   3 -10  189.83   10.91
   4  -3 -10  193.13   11.01
  -4  -3  10  182.64    9.82
  -4  -3  10  189.90    9.40
  -4   3  10  206.78   15.36
  -4  -3  10  177.60   14.68
  -4   3  10  187.26    9.98
  -4   3   9  118.09    7.06
  -4  -3   9  117.25    6.88
   4   3  -9  125.73    7.99
   4  -3  -9  117.99    7.90
  -4  -3   9  125.80   11.48
  -4   3   8   20.53    5.17
  -4  -3   8   20.13    5.12
   4   3  -8   16.41    3.34
   4  -3  -8   15.77    3.20
  -4  -3   8   14.56    2.56
  -4   3   8   22.38    2.11
  -4   3   8   16.94    2.77
  -4   3   7  500.26   23.96
  -4  -3   7  524.19   23.11
   4  -3  -7  503.44   24.72
   4   3  -7  524.68   24.66
  -4   3   7  570.18   23.33
  -4  -3   7  543.17   26.31
   4  -3  -7  547.15   26.15
  -4   3   7  530.37   28.87
  -4  -3   7  471.32   28.17
  -4  -3   6   95.05    5.44
   4   3  -6  113.13    5.45
  -4  -3   6   90.38    4.81
  -4   3   6   94.56    5.77
  -4  -3   6  104.75    5.82
  -4  -3   6   98.25    7.37
   4  -3  -6   95.80    6.89
  -4   3   6   84.78    8.72
  -4  -3   6  100.70    8.98
  -4  -3   5  221.86   10.82
  -4  -3   5  241.26   12.82
   4   3  -5  230.50   10.59
  -4   3   5  224.47   11.16
  -4  -3   5  226.23   11.15
   4  -3  -5  229.18   12.08
  -4   3   5  244.66   15.05
  -4  -3   5  240.36   15.00
  -4  -3   4  178.65    8.55
  -4  -3   4  180.91   10.20
   4   3  -4  173.40    8.21
   4  -3  -4  166.70    8.28
   4   3  -4  173.82    8.24
  -4   3   4  195.47    9.02
  -4  -3   4  190.00    8.96
  -4   3   4  182.96   12.39
  -4  -3   4  176.32   12.21
   4  -3  -4  164.36    9.20
  -4  -3   3  649.56   30.03
   4  -3  -3  648.78   28.34
   4   3  -3  658.38   28.34
  -4   3   3  684.28   32.87
  -4  -3   3  660.26   32.80
  -4   3   2    6.69    2.93
  -4  -3   2    7.25    3.09
   4   3  -2    7.48    1.22
   4   3  -2    4.97    2.77
   4  -3  -2    3.14    2.52
  -4   3   2    6.57    1.72
  -4  -3   2    9.60    2.16
   4   3  -1   16.06    1.59
   4   3  -1   22.24    3.58
   4  -3  -1   18.99    3.34
  -4   3   1   18.38    2.14
   4  -3  -1   22.48    1.65
  -4   3   0   38.65    3.01
   4   3   0   38.35    4.27
   4  -3   0   37.69    4.20
   4   3   0   36.95    2.39
   4   3   1   10.51    2.74
   4  -3   1   13.80    2.93
   4   3   1   11.24    1.33
   4  -3   2  296.00   15.73
   4   3   2  293.62   15.63
   4   3   2  282.25   12.99
   4   3   2  282.03   12.88
   4  -3   2  302.12   12.92
   4   3   3 1151.43   51.47
   4  -3   3 1165.20   51.62
   4   3   3 1153.43   49.05
   4   3   3 1124.03   48.94
   4  -3   3 1158.84   48.93
   4  -3   4   98.75    5.21
   4   3   4  100.77    7.55
   4  -3   4   94.65    7.49
   4   3   4  108.57    5.37
   4   3   4  116.89    5.55
   4  -3   4  109.70    5.53
   4   3   4  106.91    5.35
   4  -3   4  105.94    5.12
   4   3   4   99.58    5.23
   4  -3   5  301.58   13.67
   4   3   5  313.52   13.78
   4   3   5  306.39   16.51
   4  -3   5  277.50   16.29
   4  -3   5  292.37   13.51
   4   3   5  322.52   14.00
   4  -3   5  329.06   14.04
   4   3   5  304.79   13.77
   4   3   5  294.14   13.71
   4  -3   6   26.74    2.20
   4   3   6   23.96    2.58
   4  -3   6   24.58    2.05
   4   3   6   25.46    2.69
   4   3   6   23.09    2.35
   4  -3   6   27.31    2.64
   4   3   6   24.50    4.44
   4  -3   6   24.16    4.46
   4   3   6   24.53    2.11
   4   3   6   26.93    2.29
   4   3   7  318.93   19.11
   4  -3   7  321.35   19.09
   4   3   7  328.34   15.92
   4  -3   7  386.87   16.01
   4   3   7  369.65   16.50
  -4  -3  -7  362.98   16.52
   4  -3   7  347.94   16.39
   4   3   7  295.77   16.11
   4  -3   7  340.37   15.64
   4   3   7  383.20   16.34
   4  -3   7  392.27   16.41
   4   3   8  119.77    9.39
   4  -3   8  109.21    9.12
   4   3   8  102.45    5.84
  -4  -3  -8  112.82    6.38
   4  -3   8  104.04    5.45
   4   3   8  114.03    6.20
   4  -3   8  115.20    6.21
   4  -3   8  103.24    6.33
   4   3   8   81.88    5.84
   4   3   8  109.04    6.34
   4   3   9   17.28    3.10
   4  -3   9   15.12    3.05
   4  -3   9   15.31    2.03
   4   3   9   12.57    4.77
   4  -3   9    6.63    4.44
   4  -3   9   13.57    2.18
   4   3   9   13.22    2.93
  -4  -3  -9   16.17    2.80
   4   3   9   16.71    2.49
   4   3   9    7.83    2.26
   4  -3   9   14.67    2.98
   4  -3  10   32.80    2.89
   4  -3  10   29.95    2.74
   4   3  10   39.27    3.93
   4  -3  10   36.65    3.96
   4   3  10   26.71    5.82
   4  -3  10   39.68    6.69
   4  -3  10   34.21    3.94
   4   3  10   26.79    3.11
   4   3  10   39.66    3.84
   4   3  10   41.91    3.52
   4   3  11  215.30   10.80
   4   3  11  217.92   14.88
   4  -3  11  197.98   14.46
   4  -3  11  209.57   10.21
   4   3  11  230.44   11.31
   4   3  11  194.87   10.51
   4  -3  11  207.65   11.14
   4  -3  11  203.29   10.06
   4   3  11  251.26   11.23
   4  -3  11  254.62   11.26
   4   3  11  218.10   10.70
   4   3  12   47.04    3.49
   4  -3  12   43.69    4.25
   4   3  12   62.76    4.41
   4  -3  12   51.56    4.18
   4  -3  12   49.30    3.15
   4   3  12   52.54    3.81
   4  -3  12   49.55    3.25
   4   3  12   53.64    4.07
   4   3  13  108.78    6.10
   4   3  13  122.95    6.48
   4  -3  13  124.50    6.50
   4  -3  13  104.25    6.44
   4  -3  14   31.09    2.75
   4   3  14   36.60    2.59
   4   3  14   35.11    2.55
   4   4 -14  118.42    7.12
   4  -4 -14  122.74    7.33
  -4   4  14  141.76    6.85
  -4  -4  14  144.88    6.89
   4   4 -13   39.60    3.91
   4  -4 -13   44.42    4.23
  -4   4  13   46.01    3.57
  -4  -4  13   43.35    3.54
  -4  -4  12    4.91    1.84
  -4   4  12    4.08    2.49
  -4  -4  12    3.35    2.46
  -4  -4  12    5.52    2.39
   4   4 -12    4.65    2.86
   4  -4 -12    5.13    2.84
   4   4 -11  261.13   14.00
   4  -4 -11  264.19   14.13
  -4   4  11  268.62   13.26
  -4  -4  11  288.62   13.31
  -4  -4  11  263.25   15.59
  -4  -4  11  259.28   13.29
  -4   4  11  309.92   18.77
  -4  -4  11  267.11   17.81
  -4  -4  11  262.12   12.82
  -4  -4  10   73.70    4.84
  -4   4  10   76.30    5.51
  -4  -4  10   75.32    8.60
  -4   4  10   88.78    9.52
  -4  -4  10   75.75    5.32
  -4  -4  10   79.76    7.53
   4  -4 -10   74.85    6.02
   4   4 -10   71.98    5.83
  -4   4   9   30.12    3.63
  -4   4   9   33.76    7.03
  -4  -4   9   34.31    6.29
  -4  -4   9   32.00    3.59
  -4  -4   9   37.87    5.14
   4  -4  -9   35.25    4.13
   4   4  -9   33.01    4.05
  -4   4   8  227.85   12.66
   4   4  -8  254.25   13.25
   4  -4  -8  267.36   13.43
   4  -4  -8  289.68   15.40
  -4   4   8  272.71   16.91
  -4  -4   8  271.33   16.89
  -4   4   7  131.07    8.23
   4   4  -7  161.63    8.91
   4  -4  -7  161.12    8.94
   4  -4  -7  167.81   10.48
  -4   4   7  169.89   12.00
  -4  -4   7  181.75   12.23
  -4  -4   6    2.09    1.67
   4  -4  -6   10.55    2.89
  -4   4   6    4.87    3.75
  -4  -4   6    4.15    3.36
  -4  -4   6    5.89    3.08
   4  -4  -6    4.45    2.15
  -4   4   5   40.19    5.66
  -4  -4   5   43.58    3.39
  -4  -4   5   50.20    4.94
   4  -4  -5   43.83    4.34
  -4  -4   5   81.30    7.26
   4   4  -5   44.12    2.90
  -4   4   5   43.85    3.43
   4   4  -5   53.50    3.17
  -4  -4   4   98.02    5.85
  -4  -4   4  108.11    7.45
   4  -4  -4   96.44    6.64
  -4   4   4  117.13    9.07
  -4  -4   4  112.20    8.91
   4   4  -4  111.53    5.50
  -4  -4   4  113.27    6.01
  -4   4   4  114.23    6.04
   4   4  -4  119.52    5.57
  -4  -4   3    1.89    2.12
  -4   4   3    0.50    2.51
  -4  -4   3    2.46    2.28
   4   4  -3    0.76    1.03
  -4   4   3    1.26    1.27
  -4  -4   3    2.37    1.36
   4  -4  -3    2.58    1.17
   4   4  -2 2000.63   90.64
   4  -4  -2 1926.19   90.41
  -4   4   2 1980.31   91.11
  -4  -4   2 2101.61   91.30
  -4  -4   2 2145.85   87.73
   4   4  -2 2044.31   87.39
   4   4  -1 1919.44   80.74
  -4   4   1 1837.80   81.42
   4   4  -1 1878.45   83.43
   4  -4  -1 1791.90   83.26
   4  -4  -1 1946.34   80.67
   4   4   0  232.81   10.88
   4  -4   0  245.24   10.79
   4   4   0  252.40   13.29
   4  -4   0  222.13   12.92
   4   4   1  140.45    6.71
   4  -4   1  139.59    8.88
   4   4   1  152.52    9.05
   4   4   2  231.66   11.21
   4  -4   2  260.20   11.17
   4   4   2  245.93   11.10
   4  -4   2  259.37   13.74
   4   4   2  237.43   13.44
   4  -4   3  436.91   18.97
   4   4   3  424.50   18.97
   4   4   3  437.56   19.13
   4  -4   4 1142.27   48.82
   4   4   4 1194.85   49.20
   4   4   4 1111.48   49.05
   4   4   4 1121.97   48.97
   4  -4   4 1153.95   49.01
   4   4   4 1134.18   51.69
   4  -4   4 1128.42   51.78
   4   4   4 1183.77   49.22
   4   4   5  468.77   21.02
   4   4   5  499.93   21.18
   4  -4   5  517.32   21.24
   4  -4   5  468.96   20.73
   4   4   5  442.05   20.92
   4   4   5  490.27   21.11
   4   4   5  472.66   23.81
   4  -4   5  466.91   23.84
   4  -4   5  479.37   20.94
   4  -4   6   11.63    2.11
   4   4   6   12.81    1.72
   4   4   6   12.35    1.78
   4   4   6   15.29    2.32
   4  -4   6   12.90    1.53
   4  -4   6   13.29    1.72
   4   4   6   11.32    1.95
   4   4   6   14.06    2.15
   4  -4   6   15.96    2.10
   4   4   6   10.75    3.66
   4  -4   6   15.94    3.81
   4   4   7   17.32    2.59
   4  -4   7   24.41    2.75
   4   4   7   18.21    4.42
   4  -4   7   15.84    4.09
   4   4   7   18.37    2.34
   4   4   7   13.43    2.20
   4   4   7   19.69    1.93
   4   4   7   20.64    2.73
  -4  -4  -7   21.33    2.69
   4  -4   7   17.07    1.87
   4  -4   7   19.13    2.10
   4   4   7   20.42    2.29
   4  -4   8  148.64    7.01
   4   4   8  137.60    7.49
   4   4   8  163.55    7.95
   4  -4   8  156.19    7.89
   4  -4   8  143.26    7.98
   4   4   8  132.22    7.53
   4  -4   8  142.16    7.15
   4   4   8  138.27    8.06
  -4  -4  -8  151.84    8.14
   4   4   8  136.10    7.44
   4   4   8  156.19   10.93
   4  -4   8  130.56   10.34
   4  -4   9   80.77    4.40
   4   4   9   67.25    4.92
   4   4   9   96.33    5.58
   4  -4   9   87.58    5.46
   4   4   9   62.02    7.61
   4   4   9   74.65    4.96
   4  -4   9   72.66    5.30
   4  -4   9   81.26    4.62
   4   4   9   81.50    5.70
  -4  -4  -9   86.82    5.64
   4   4   9   73.06    4.90
   4  -4   9   77.09    7.96
   4   4  10  206.85   10.00
   4  -4  10  210.06   10.06
   4  -4  10  191.67    9.01
   4  -4  10  182.09   10.14
   4   4  10  167.82    9.42
   4  -4  10  196.23    9.22
   4   4  10  195.81   10.31
   4   4  10  180.50    9.60
   4   4  10  180.48   13.24
   4  -4  10  178.96   13.26
  -4  -4 -10  207.13   10.44
   4  -4  11   -1.17    2.69
   4   4  11    0.75    2.29
   4  -4  11    0.39    1.58
   4  -4  11    0.08    1.48
   4   4  11    0.63    2.38
   4  -4  11    0.96    2.45
   4   4  11    5.49    4.53
   4  -4  11    2.47    3.84
   4   4  12   48.90    3.92
   4  -4  12   45.90    3.83
   4   4  12   39.27    3.54
   4  -4  12   46.57    4.16
   4  -4  13   20.34    2.78
   4   4  13   23.50    2.57
   4   4  13   22.76    2.68
   4  -4  14   14.40    2.02
   4   4  14   10.61    1.72
   4   4  14   11.15    1.77
   4  -5 -14   83.01    4.99
   4   5 -14   79.62    4.75
   4   5 -13   66.54    5.10
   4  -5 -13   70.42    5.31
  -4  -5  13   85.37    4.68
  -4   5  13   86.90    4.86
  -4  -5  13   89.14    4.87
  -4  -5  12   16.41    2.81
  -4  -5  12   11.12    2.16
   4   5 -12    9.72    2.84
   4  -5 -12    8.76    2.78
  -4  -5  12    8.93    2.32
  -4   5  12   10.70    2.39
   4   5 -11   15.88    3.29
   4  -5 -11   24.87    3.71
  -4  -5  11   28.58    4.76
  -4   5  11   27.57    3.14
  -4  -5  11   24.00    3.00
  -4   5  11   15.87    5.16
  -4  -5  11   21.63    5.16
  -4  -5  11   18.99    3.02
  -4  -5  11   18.27    2.75
  -4  -5  10   49.47    5.91
  -4  -5  10   45.15    3.85
  -4  -5  10   45.63    4.29
   4  -5 -10   47.90    4.56
   4   5 -10   49.08    4.70
  -4   5  10   46.34    4.32
  -4   5  10   48.00    7.06
  -4  -5  10   39.16    6.65
  -4  -5   9  107.40    9.68
  -4   5   9  104.46    9.95
  -4  -5   9  100.13    8.40
  -4  -5   9   89.02    6.32
   4   5  -9  108.56    6.85
   4  -5  -9  102.27    6.86
   4  -5  -8  244.64   14.11
  -4   5   8  237.44   15.08
  -4  -5   8  210.82   14.42
  -4  -5   8  248.36   13.87
   4   5  -8  206.44   11.68
   4  -5  -8  223.45   11.89
  -4  -5   7    6.68    2.08
   4  -5  -7    5.49    3.23
  -4   5   7   10.76    3.99
  -4  -5   7    4.05    3.33
   4   5  -7    7.16    2.42
   4  -5  -7    5.15    2.25
  -4  -5   6   68.55    4.43
  -4   5   6   66.71    6.97
  -4  -5   6   55.90    6.33
   4  -5  -6   70.56    6.09
   4  -5  -6   61.75    4.68
   4   5  -6   60.98    4.58
  -4  -5   5  356.79   16.78
  -4   5   5  357.40   16.50
  -4  -5   5  369.79   16.49
   4  -5  -5  362.19   18.52
  -4   5   5  350.13   19.85
  -4  -5   5  381.34   19.91
  -4  -5   5  367.48   18.71
   4   5  -5  357.83   16.04
   4   5  -4   13.99    1.61
   4  -5  -4   17.71    2.82
  -4  -5   4   12.51    3.05
  -4   5   4   14.57    1.86
  -4  -5   4   12.39    1.77
   4   5  -4   12.28    1.48
  -4   5   4    9.65    3.17
  -4  -5   4   13.60    3.37
  -4  -5   4   12.12    1.97
  -4   5   3  329.85   15.22
  -4  -5   3  331.01   15.20
  -4  -5   3  354.24   15.59
   4   5  -3  334.79   15.01
  -4   5   3  308.90   18.00
  -4  -5   3  339.05   18.23
  -4  -5   3  336.92   17.01
  -4  -5   2  726.24   34.25
  -4   5   2  715.77   34.16
  -4  -5   2  722.97   31.35
   4  -5  -2  724.90   30.94
   4   5  -2  719.76   30.97
   4   5  -2  671.52   33.56
   4  -5  -2  665.42   33.41
  -4  -5   1  472.44   21.79
   4  -5  -1  511.65   21.45
   4   5  -1  493.76   21.54
   4   5  -1  480.74   23.70
   4  -5  -1  467.42   23.59
  -4   5   1  484.17   22.12
   4  -5   0  424.10   17.94
   4   5   0  395.88   20.00
   4  -5   0  390.87   19.96
   4   5   0  398.20   18.07
   4   5   1    8.48    1.41
   4  -5   1   10.91    1.23
   4  -5   1    9.67    1.38
   4  -5   1    6.82    2.28
   4   5   1    9.25    2.48
   4   5   2  598.67   26.73
   4  -5   2  603.75   28.97
   4   5   2  603.95   28.99
   4   5   2  628.09   26.53
   4  -5   3  410.03   17.34
  -4  -5  -3  383.18   17.62
   4   5   3  392.97   17.30
   4   5   3  377.59   17.49
   4  -5   4  237.67   10.78
   4   5   4  237.10   11.04
   4   5   4  231.58   10.68
   4   5   4  240.03   10.87
   4   5   4  232.06   13.21
   4  -5   4  235.64   13.24
   4   5   5   16.58    1.75
   4   5   5   16.03    1.98
   4  -5   5   14.58    3.59
   4   5   5   20.88    2.06
   4  -5   5   19.64    2.13
   4   5   5   16.78    2.01
   4   5   5   14.61    3.53
   4  -5   5   18.41    1.82
   4  -5   6  321.57   14.18
   4   5   6  306.52   14.24
   4   5   6  308.23   14.37
   4  -5   6  315.98   14.71
   4   5   6  311.24   17.22
   4  -5   6  325.20   17.27
   4  -5   6  301.07   13.91
   4   5   6  319.03   14.37
   4   5   6  330.10   14.49
   4  -5   6  327.29   14.45
   4   5   7  141.00    7.11
   4   5   7  155.91    7.30
   4  -5   7  152.77    7.32
   4  -5   7  134.74    6.55
   4  -5   7  134.93    6.80
   4   5   7  131.17    6.97
   4   5   7  133.87    6.89
   4   5   7  134.61    9.88
   4  -5   7  126.35    9.87
   4  -5   7  126.06    7.40
  -4  -5  -7  134.91    7.57
  -4  -5  -8   14.23    2.68
   4   5   8   10.20    2.17
   4   5   8   10.33    2.51
   4   5   8   20.14    2.78
   4  -5   8   12.43    2.49
   4   5   8   11.89    4.38
   4  -5   8   11.93    4.26
   4  -5   8   11.34    1.65
   4  -5   8   11.36    2.00
   4  -5   9  127.41    6.63
  -4  -5  -9  125.85    7.68
   4   5   9  145.64   10.56
   4  -5   9  105.15    9.78
   4   5   9  127.05    7.12
   4   5   9  142.11    7.37
   4  -5   9  147.70    7.28
   4  -5   9  130.33    6.39
   4   5   9  122.80    6.98
   4  -5  10    7.29    2.94
   4   5  10    6.75    2.40
   4  -5  10    8.97    1.87
   4   5  10    5.59    2.66
   4  -5  10    6.28    2.52
   4   5  10    7.60    2.72
   4   5  10    5.20    4.30
   4  -5  10    6.44    3.98
  -4  -5 -10    6.38    2.81
   4  -5  11    8.89    3.04
   4   5  11   13.00    2.71
   4  -5  11   14.08    2.77
   4   5  11   10.74    2.73
   4   5  11   10.95    2.56
   4  -5  12    7.70    2.70
   4   5  12   10.36    2.45
   4  -5  12    8.37    2.37
   4   5  12    7.79    2.33
   4  -5  13    8.25    2.31
   4  -5  14   46.51    3.11
   4   5  14   39.19    2.81
   4   5  14   45.05    2.86
   4  -6 -14   24.57    2.04
   4   6 -14   20.53    2.07
   4   6 -13   11.43    2.22
   4  -6 -13   14.63    2.46
  -4   6  13   12.46    1.93
  -4  -6  13   14.50    1.96
  -4  -6  13   13.88    1.97
  -4  -6  12   42.04    4.05
   4  -6 -12   54.89    4.55
   4   6 -12   50.28    4.28
  -4   6  12   60.68    3.91
  -4  -6  12   65.57    3.94
  -4  -6  12   57.20    4.01
  -4   6  11  199.90    9.34
  -4  -6  11  195.84    9.23
  -4  -6  11  163.46    9.70
   4  -6 -11  175.57   10.01
   4   6 -11  184.50    9.99
  -4  -6  11  167.50    9.40
  -4   6  11  182.40   13.05
  -4  -6  10   84.51    8.36
  -4   6  10   83.28    8.42
  -4  -6  10   83.63    5.05
  -4  -6  10   86.66    7.65
   4   6 -10   85.03    5.86
   4  -6 -10   77.76    5.88
  -4  -6  10   70.75    5.59
  -4  -6   9   52.27    6.04
  -4   6   9   31.91    6.01
  -4  -6   9   35.53    6.08
   4   6  -9   40.16    4.12
   4  -6  -9   51.77    4.42
  -4  -6   9   34.53    3.98
  -4  -6   8   39.39    5.43
   4   6  -8   38.90    3.75
   4  -6  -8   34.21    3.80
  -4  -6   8   22.38    4.96
   4  -6  -8   36.74    5.13
  -4  -6   7   57.78    4.30
  -4  -6   7   55.89    5.95
   4  -6  -7   52.01    5.86
  -4  -6   7   53.75    6.16
   4  -6  -7   44.07    4.08
   4   6  -7   46.16    4.00
  -4   6   7   44.12    4.12
  -4   6   7   45.57    5.89
  -4   6   6  354.16   18.02
  -4  -6   6  303.34   17.26
   4  -6  -6  331.51   17.02
  -4  -6   6  301.65   14.75
   4  -6  -6  300.20   14.79
   4   6  -6  290.73   14.62
   4  -6  -5   19.05    3.36
  -4  -6   5   17.07    2.55
  -4   6   5   19.82    2.08
  -4   6   5   19.59    3.93
  -4  -6   5   15.21    3.68
   4   6  -4   21.33    1.92
   4  -6  -4   20.38    3.27
  -4   6   4   19.09    3.69
  -4  -6   4   26.14    3.81
  -4   6   4   20.82    2.05
  -4  -6   4   21.93    2.03
  -4  -6   4   22.95    3.71
  -4   6   3    6.65    1.45
  -4  -6   3    3.69    1.21
   4   6  -3    5.64    1.33
   4   6  -3    0.82    2.30
   4  -6  -3    2.83    2.36
  -4   6   3    9.22    2.92
  -4  -6   3    4.06    2.48
  -4  -6   3    6.35    1.76
  -4   6   2 1147.46   51.55
  -4  -6   2 1142.68   51.47
  -4  -6   2 1109.50   49.04
   4   6  -2 1127.10   50.88
   4  -6  -2 1108.74   50.79
   4   6  -2 1150.09   48.60
   4   6  -1    2.10    2.01
   4  -6  -1   -0.30    1.84
  -4  -6   1    1.94    1.35
  -4   6   1    0.40    2.16
  -4  -6   1    1.95    2.00
   4  -6  -1    2.29    1.11
   4  -6  -1    2.48    1.18
   4   6  -1    1.59    1.25
   4  -6   0 2134.11   95.19
   4   6   0 2161.88   95.23
   4  -6   0 2296.74   93.23
   4  -6   0 2119.34   93.42
   4   6   0 2195.90   93.44
   4  -6   1  136.42    8.24
   4   6   1  135.73    8.22
   4   6   1  129.07    6.55
  -4  -6  -1  126.21    6.82
   4  -6   1  134.92    6.26
   4  -6   1  125.27    6.57
  -4  -6  -2 1275.53   59.29
   4   6   2 1376.65   57.73
  -4  -6  -2 1347.77   58.31
   4  -6   2 1363.76   57.62
   4   6   3   94.97    4.83
   4   6   3   95.74    5.12
  -4  -6  -3   86.12    5.18
   4  -6   4   86.66    4.41
  -4  -6  -4   75.39    4.71
   4   6   4   81.15    4.65
   4   6   4   80.00    4.43
   4   6   5  126.62    8.82
   4  -6   5  128.47    8.93
   4   6   5  142.04    6.79
   4  -6   5  149.41    7.13
   4   6   5  116.63    7.18
   4   6   5  135.07    6.57
  -4  -6  -5  124.67    6.94
   4   6   5  133.52    6.92
   4  -6   5  141.20    6.63
   4   6   6  407.94   21.39
   4   6   6  457.93   20.82
   4   6   6  498.81   20.91
   4  -6   6  490.68   20.89
   4  -6   6  470.20   20.66
   4   6   6  491.85   21.05
   4   6   6  475.69   23.70
   4  -6   6  444.10   23.46
  -4  -6  -6  477.76   21.49
   4  -6   6  468.26   21.22
   4   6   6  456.03   20.69
   4   6   7   32.47    3.01
   4   6   7   37.54    3.13
   4  -6   7   39.90    3.06
   4   6   7   37.38    5.16
   4  -6   7   37.64    5.03
   4  -6   7   38.19    2.76
   4   6   7   32.64    2.88
   4  -6   7   38.36    3.43
  -4  -6  -7   35.40    3.36
   4   6   7   38.05    2.92
   4   6   7   33.27    3.67
   4   6   8  216.94   12.36
   4   6   8  250.21   11.70
   4   6   8  266.34   11.78
   4  -6   8  262.08   11.75
   4  -6   8  251.78   11.30
   4   6   8  227.72   11.34
  -4  -6  -8  244.82   12.34
   4   6   8  232.21   14.62
   4  -6   8  240.07   14.68
   4  -6   8  232.83   11.98
   4   6   8  236.28   11.52
   4   6   9   87.98    5.39
   4   6   9   85.91    5.19
   4  -6   9   90.13    5.32
   4   6   9   69.68    5.89
   4  -6   9   87.38    4.70
   4   6   9   76.87    7.67
   4  -6   9   82.23    8.12
  -4  -6  -9   86.47    5.88
   4   6   9   83.66    5.12
   4   6  10  427.31   19.45
   4   6  10  377.68   20.19
   4   6  10  416.68   22.94
   4  -6  10  410.02   22.97
   4   6  10  435.17   19.51
   4   6  10  452.95   19.58
   4  -6  10  448.32   19.59
  -4  -6 -10  421.42   20.28
   4  -6  11   -1.56    2.53
   4   6  11    1.76    2.76
   4   6  11    2.78    2.19
   4   6  11    4.10    2.25
   4  -6  11   -1.88    2.17
   4   6  11    2.79    2.43
   4   6  12  104.15    5.70
   4   6  12   98.94    5.74
   4  -6  12  101.76    6.10
   4  -6  13    5.98    2.13
   4   6  13    5.89    1.84
   4   6  14   64.46    3.63
   4  -7 -14    0.94    1.09
   4   7 -14   -0.31    0.92
  -4  -7  13   62.21    4.07
   4   7 -13   60.26    4.01
  -4  -7  12   47.41    4.24
  -4  -7  12   56.02    4.08
  -4   7  12   65.16    3.81
  -4  -7  12   67.36    3.81
   4   7 -12   54.89    4.15
   4  -7 -12   58.05    4.33
  -4  -7  11   41.40    4.06
   4  -7 -11   42.08    3.95
   4   7 -11   49.08    3.99
  -4  -7  11   43.85    3.95
  -4   7  11   49.36    3.48
  -4  -7  11   49.77    3.44
  -4   7  10   11.99    2.19
  -4  -7  10   11.75    2.16
  -4   7  10    4.92    2.95
  -4  -7  10    9.82    3.83
  -4  -7  10    7.54    2.77
  -4   7  10    9.14    4.13
  -4  -7  10    9.14    3.70
   4   7 -10    7.00    2.44
   4  -7 -10    7.18    2.54
  -4  -7   9   92.40    7.57
  -4   7   9   83.17    5.64
  -4  -7   9   50.58    5.04
   4   7  -9   73.02    5.17
   4  -7  -9   68.75    5.15
  -4   7   9   67.25    7.45
  -4  -7   9   63.85    7.15
  -4  -7   8   24.28    4.63
  -4   7   8   26.39    5.32
  -4  -7   8   30.22    5.00
  -4   7   8   32.92    3.68
   4   7  -8   26.94    3.22
   4  -7  -8   27.39    3.39
   4  -7  -8   27.66    4.57
   4  -7  -7  200.84   13.16
  -4   7   7  210.36   13.28
  -4  -7   7  220.63   13.36
  -4  -7   7  253.38   13.54
  -4   7   7  237.28   11.22
  -4  -7   7  196.71   10.98
   4   7  -7  200.98   10.71
   4  -7  -7  200.51   10.82
   4  -7  -6    6.37    1.98
  -4  -7   6    6.09    2.22
   4  -7  -6   12.01    3.59
  -4   7   6    8.52    3.25
  -4  -7   6    5.51    3.05
  -4  -7   6    7.15    3.59
   4  -7  -6    5.70    1.83
  -4   7   6    9.66    2.40
  -4  -7   5  863.90   39.81
   4  -7  -5  903.81   39.88
  -4   7   5  897.85   40.08
  -4  -7   5  758.41   37.43
   4  -7  -5  886.10   37.59
   4   7  -4  311.49   17.81
   4  -7  -4  297.93   17.67
  -4   7   4  350.75   17.94
  -4  -7   4  328.29   17.70
   4   7  -4  335.70   15.07
  -4   7   4  338.89   15.06
  -4  -7   4  335.06   14.99
  -4  -7   3   38.06    3.41
  -4   7   3   48.58    4.86
  -4  -7   3   39.74    4.41
   4   7  -3   40.85    4.53
   4  -7  -3   43.59    4.60
   4   7  -3   43.72    2.94
  -4   7   3   43.49    2.78
  -4  -7   3   39.02    2.67
  -4   7   2    3.31    1.22
  -4  -7   2    2.93    1.13
   4  -7  -2    4.26    2.14
   4   7  -2    2.78    2.16
  -4  -7   2    3.30    1.61
   4   7  -2    0.87    1.33
  -4   7   2    0.75    2.22
  -4  -7   2    0.36    2.16
   4  -7  -1  285.97   14.92
   4   7  -1  292.52   14.99
  -4   7   1  289.57   15.72
  -4  -7   1  307.70   15.83
   4   7  -1  317.43   13.68
  -4  -7   1  262.43   13.86
   4  -7  -1  308.25   13.64
   4  -7   0   52.97    3.49
   4  -7   0   48.13    4.25
   4   7   0   56.56    4.56
   4   7   0   54.55    3.43
  -4  -7  -1   12.89    2.01
   4  -7   1   13.58    1.45
   4  -7   1   14.87    1.88
   4   7   1   15.44    1.94
   4  -7   1    9.75    2.21
   4   7   1   16.07    2.65
   4   7   2  228.31    9.71
  -4  -7  -2  198.83   10.31
   4  -7   2  202.70    9.52
  -4  -7  -3  578.71   27.66
   4   7   3  640.20   27.56
  -4  -7  -3  603.60   29.49
   4   7   3  648.96   27.13
  -4  -7  -4   18.40    2.23
   4   7   4   16.04    2.38
   4   7   4   23.32    2.10
   4   7   4   15.87    2.20
   4   7   5  395.93   20.07
   4  -7   5  454.17   19.86
   4   7   5  446.92   19.88
  -4  -7  -5  429.33   19.98
   4   7   5  455.46   19.50
  -4  -7  -6   18.87    2.30
   4  -7   6   10.34    2.19
   4   7   6   10.01    3.39
   4  -7   6   11.29    3.40
   4   7   6   10.14    1.99
   4   7   6   12.50    1.75
  -4  -7  -6   10.46    2.28
   4  -7   6    8.30    1.65
   4   7   6   10.17    2.12
   4   7   6    3.47    2.12
   4   7   7  252.08   14.39
   4  -7   7  297.30   13.42
   4   7   7  314.15   16.71
   4  -7   7  280.86   16.35
   4   7   7  298.41   13.77
   4   7   7  330.01   13.80
   4   7   7  299.39   13.57
   4  -7   7  296.98   14.16
   4   7   7  296.73   13.87
  -4  -7  -7  278.13   14.32
  -4  -7  -8    1.45    2.28
   4  -7   8   -0.95    3.17
   4   7   8    0.74    1.99
   4  -7   8    4.42    2.13
   4   7   8    7.58    2.24
   4   7   8   -1.43    3.72
   4   7   8    0.69    1.72
   4  -7   8    1.76    1.54
   4   7   8    0.90    1.61
   4   7   8    1.35    2.44
   4  -7   8   -2.07    2.34
   4  -7   9   42.59    5.89
   4   7   9   57.82    4.01
   4   7   9   51.84    3.87
   4  -7   9   55.56    3.90
   4   7   9   59.77    6.56
  -4  -7  -9   55.25    4.58
   4   7   9   57.42    3.84
   4   7   9   43.88    4.59
   4  -7   9   50.90    4.33
   4  -7  10   40.50    5.54
   4   7  10   48.54    3.87
   4   7  10   48.08    3.64
  -4  -7 -10   41.71    4.20
   4   7  10   34.96    4.18
   4  -7  10   44.26    4.13
   4   7  10   47.40    3.53
   4   7  11    9.47    2.12
   4   7  11    3.22    2.72
   4   7  11    5.40    2.42
   4   7  12   49.72    3.57
   4   7  13   70.14    4.10
   4  -7  13   71.00    4.33
  -4  -8  13   16.32    1.97
   4  -8 -13   20.59    2.17
   4   8 -12    2.86    1.59
  -4  -8  12    3.53    1.74
   4   8 -11    0.50    1.87
  -4   8  11   -1.28    1.57
  -4  -8  11    2.41    1.62
  -4  -8  11   -2.58    2.33
  -4   8  10   24.07    3.44
   4   8 -10   20.29    2.80
   4  -8 -10   15.61    2.63
  -4   8  10   20.00    2.31
  -4  -8  10   20.04    2.29
  -4   8   9   32.32    3.84
   4  -8  -9   23.17    3.06
   4   8  -9   28.75    3.16
  -4   8   9   31.88    2.76
  -4  -8   9   35.27    2.79
  -4   8   8   36.57    5.47
  -4  -8   8   45.28    5.57
   4  -8  -8   33.44    3.51
  -4   8   8   42.44    4.02
   4  -8  -8   39.95    5.49
   4  -8  -7    9.20    3.36
  -4   8   7    9.31    3.57
  -4  -8   7    8.80    3.48
   4  -8  -7    9.67    2.11
  -4   8   7   12.20    2.93
  -4  -8   7    4.57    2.45
  -4  -8   6   12.39    2.67
   4  -8  -6   14.92    2.51
  -4   8   6   15.42    3.52
  -4  -8   6   10.30    3.28
   4  -8  -6    7.72    3.46
   4  -8  -6   10.67    2.06
  -4   8   6   17.46    2.70
   4   8  -5  293.71   16.86
   4  -8  -5  299.16   16.95
  -4  -8   5  249.09   14.52
   4  -8  -5  329.92   14.90
  -4   8   5  358.17   16.93
  -4  -8   5  322.76   16.54
   4  -8  -5  296.13   16.76
  -4   8   4   98.83    7.14
  -4  -8   4   89.18    6.81
  -4  -8   4   73.20    5.56
   4   8  -4   89.90    4.88
   4  -8  -4   89.80    5.62
   4   8  -4   82.27    6.77
   4  -8  -4   88.20    6.87
  -4   8   3    2.53    2.13
  -4  -8   3    3.14    2.03
   4  -8  -3    2.67    1.82
  -4  -8   3    1.59    1.76
   4   8  -3    1.30    1.98
   4  -8  -3   -0.64    2.07
   4   8  -3    0.93    1.48
  -4  -8   3    2.89    1.13
  -4  -8   2  214.96   11.95
   4  -8  -2  262.00   11.64
   4   8  -2  255.53   11.60
   4  -8  -2  216.04   12.61
   4   8  -2  254.30   12.95
  -4   8   2  246.13   13.45
  -4  -8   2  267.90   13.57
  -4   8   1   28.09    3.75
  -4  -8   1   32.33    3.73
  -4  -8   1   25.23    2.76
   4  -8  -1   37.35    2.69
   4  -8  -1   28.30    3.28
   4   8  -1   33.29    3.43
   4   8  -1   28.64    2.54
   4  -8   0   20.26    2.22
  -4   8   0   15.16    3.10
  -4  -8   0   15.64    2.86
   4  -8   0   18.40    2.78
   4   8   0   20.38    2.84
   4   8   0   18.74    2.18
   4  -8   1  125.65    6.59
   4   8   1  128.48    6.52
  -4  -8  -1  109.26    6.66
  -4  -8  -2   18.79    2.53
   4   8   2   22.82    2.37
   4   8   2   22.49    1.87
   4   8   3   22.36    2.52
  -4  -8  -3   19.37    3.54
  -4  -8  -3   26.44    2.77
   4   8   3   26.01    2.64
   4   8   3   25.78    2.08
   4   8   4   34.79    2.65
   4  -8   4   42.68    2.95
   4   8   4   38.30    3.17
  -4  -8  -4   32.83    4.72
  -4  -8  -4   29.94    3.01
   4   8   4   36.20    3.22
   4  -8   4   33.74    3.24
   4   8   5  239.83   10.79
  -4  -8  -5  223.44   11.39
   4   8   5  233.59   11.30
  -4  -8  -5  218.87   13.95
   4  -8   5  249.30   11.23
  -4  -8  -5  226.97   11.52
   4   8   5  209.68   11.42
   4   8   6  205.32   10.40
   4   8   6  187.86   10.69
  -4  -8  -6  216.07   10.84
  -4  -8  -6  202.39   10.55
   4  -8   6  222.44   10.48
   4   8   6  219.40   10.06
   4   8   7   32.35    4.77
   4  -8   7   41.00    5.16
   4   8   7   39.66    3.28
   4   8   7   38.64    2.80
   4   8   7   28.58    3.65
  -4  -8  -7   36.60    3.78
  -4  -8  -7   38.47    3.36
   4  -8   7   39.46    3.53
   4   8   7   34.22    3.29
   4   8   8   21.91    2.57
   4   8   8   23.22    3.41
  -4  -8  -8   24.08    3.34
   4  -8   8   21.09    4.32
   4   8   8   23.80    2.90
   4  -8   8   26.08    3.17
   4   8   8   23.01    2.37
   4   8   9    0.69    2.69
  -4  -8  -9    3.66    2.45
   4  -8   9    2.78    3.37
   4   8   9    5.96    2.46
   4  -8   9    8.22    2.71
   4   8   9    5.16    1.89
   4   8  10  239.80   10.92
  -4  -8 -10  220.55   11.63
   4   8  10  206.30   11.66
   4  -8  10  219.51   11.25
   4   8  10  228.46   10.68
   4   8  11  115.34    5.92
   4   8  11   92.14    6.53
   4   8  11  107.50    5.68
   4  -8  11  105.98    6.20
   4   8  12   32.01    2.86
   4   8  13    0.85    1.46
  -4  -9  13   20.52    2.09
   4  -9 -13   27.67    2.25
  -4  -9  12    7.56    2.23
  -4  -9  12    7.40    1.90
  -4  -9  11   39.94    3.70
  -4  -9  11   34.08    3.43
  -4  -9  10   40.48    4.07
  -4   9  10   42.84    4.13
  -4  -9   9  282.01   14.07
  -4  -9   9  287.41   12.80
   4  -9  -8   30.84    3.10
   4  -9  -8   28.16    4.74
  -4  -9   8   36.62    2.73
  -4   9   8   41.46    3.77
   4  -9  -7  238.80   14.12
  -4   9   7  279.26   11.75
  -4  -9   6    0.24    2.32
  -4   9   6    2.13    2.28
   4  -9  -6    4.49    2.86
   4  -9  -6    3.41    3.24
   4  -9  -6    3.61    1.96
   4  -9  -5  233.49   13.39
  -4  -9   5  255.21   13.25
   4  -9  -5  266.07   12.17
   4  -9  -4    1.59    2.06
  -4  -9   4    2.71    2.08
   4   9  -4    3.38    1.58
   4  -9  -4    0.34    2.04
  -4  -9   4    0.23    2.23
  -4  -9   3   84.97    6.23
  -4  -9   3   73.70    5.49
   4  -9  -3   77.38    5.88
   4  -9  -3   93.51    5.82
   4   9  -3   93.48    5.00
  -4  -9   2   55.36    4.76
  -4  -9   2   45.01    4.05
   4  -9  -2   52.78    4.45
   4   9  -2   57.81    3.81
   4  -9  -2   62.48    4.55
   4  -9  -2   63.91    3.93
  -4  -9   1  452.16   21.86
  -4  -9   1  408.46   20.89
   4  -9  -1  474.33   20.44
   4  -9  -1  469.35   21.33
   4  -9  -1  406.23   21.17
   4   9  -1  491.61   20.54
   4  -9   0   45.36    3.42
  -4  -9   0   45.81    4.32
   4  -9   0   40.23    3.73
   4   9   0   46.02    3.38
  -4  -9  -1   13.31    2.60
   4  -9   1    9.25    2.34
   4   9   1    9.93    2.09
  -4  -9  -1    9.89    2.23
   4  -9   1    8.53    1.98
   4   9   1   10.34    1.87
   4   9   2  551.96   24.45
   4  -9   2  559.89   25.32
  -4  -9  -2  532.48   24.92
   4   9   2  550.99   24.57
   4  -9   3  780.35   35.42
   4   9   3  792.82   34.75
  -4  -9  -3  758.83   35.06
   4   9   3  808.42   34.07
  -4  -9  -4   21.22    2.76
   4   9   4   24.13    2.09
   4  -9   4   26.02    2.48
   4   9   4   20.68    2.70
  -4  -9  -4   25.08    2.82
   4   9   4   19.59    2.63
   4  -9   4   23.63    2.92
  -4  -9  -4   15.73    3.93
   4   9   5  563.92   24.20
   4  -9   5  568.93   24.59
   4   9   5  570.32   24.89
   4  -9   5  524.11   25.12
  -4  -9  -5  550.45   25.00
   4   9   5  534.09   24.99
  -4  -9  -5  496.72   27.90
  -4  -9  -6   65.46    4.75
   4  -9   6   66.82    4.40
   4   9   6   59.37    4.83
   4   9   6   61.61    4.06
  -4  -9  -6   66.87    4.65
  -4  -9  -6   56.56    6.96
   4   9   6   61.93    4.46
  -4  -9  -7   34.06    3.64
   4  -9   7   26.72    3.21
   4   9   7   27.67    3.54
   4   9   7   34.55    2.92
  -4  -9  -7   32.77    3.27
  -4  -9  -7   26.37    5.60
   4   9   7   30.33    3.19
  -4  -9  -8   38.17    4.17
   4  -9   8   48.82    3.91
   4   9   8   48.15    4.31
   4   9   8   55.47    3.74
  -4  -9  -8   44.48    3.88
   4   9   8   44.73    3.60
  -4  -9  -8   41.36    6.50
   4   9   9  503.89   21.16
   4  -9   9  493.73   21.56
  -4  -9  -9  466.81   26.49
   4   9   9  446.88   21.08
   4   9   9  455.83   21.99
  -4  -9  -9  453.47   21.95
   4   9  10    5.69    1.73
   4   9  10    4.41    2.21
   4   9  10    5.56    2.88
   4  -9  10    4.23    2.38
   4   9  11   14.56    2.38
   4   9  11   11.03    2.87
   4  -9  11   16.16    2.51
   4   9  12   53.11    3.39
   4  -9  12   52.32    3.55
  -4  -9 -12   53.07    4.08
  -4  -9 -13    2.62    1.34
   4   9  13    2.20    1.23
   4 -10 -13   -0.37    1.15
  -4 -10  13   -0.45    1.23
   4 -10 -12   21.51    2.36
  -4 -10  12   14.55    2.17
  -4 -10  12   15.53    2.21
  -4 -10  11   15.67    2.54
  -4 -10  11   18.55    2.70
  -4 -10  10   66.69    4.98
  -4  10  10   70.54    4.81
  -4 -10   9   63.51    5.03
  -4  10   9   68.40    4.93
   4 -10  -8   83.12    8.12
  -4  10   8  117.44    6.63
  -4  10   7  208.46   10.43
   4 -10  -7  193.78   10.62
  -4  10   6   71.34    4.86
   4 -10  -6   63.48    5.01
  -4 -10   5    4.37    2.40
   4 -10  -5    2.98    2.20
   4  10  -4   33.54    2.78
   4 -10  -4   36.26    3.78
   4  10  -3   31.61    2.90
  -4 -10   3   25.20    3.53
  -4 -10   2   49.56    4.15
   4  10  -2   47.59    3.52
   4 -10  -2   45.90    4.22
   4 -10  -2   48.26    3.54
  -4 -10   1  308.20   15.19
   4 -10  -1  309.04   14.26
   4  10  -1  310.81   14.61
   4 -10  -1  315.63   14.59
   4 -10  -1  317.20   15.53
   4  10   0  393.70   18.14
   4 -10   0  396.21   18.16
   4 -10   1  216.14   10.59
   4  10   1  209.74   10.21
   4  10   1  205.67   10.45
  -4 -10  -1  198.56   10.86
   4 -10   1  228.07   11.39
   4  10   2   40.50    3.21
   4  10   2   42.52    3.55
  -4 -10  -2   44.60    3.89
   4 -10   2   41.16    3.89
  -4 -10  -3   27.84    3.17
   4 -10   3   19.95    2.96
   4  10   3   25.98    2.87
  -4 -10  -3   26.96    2.96
   4  10   3   21.62    2.03
  -4 -10  -4    8.48    2.31
   4 -10   4    6.65    1.78
   4  10   4   11.99    1.83
   4  10   4    7.17    2.25
   4  10   4    7.60    2.34
   4 -10   4   10.25    2.49
  -4 -10  -4   13.17    2.45
  -4 -10  -5   15.44    2.74
   4 -10   5   17.56    2.37
   4  10   5   17.32    2.93
   4  10   5   12.54    2.64
   4 -10   5   11.65    2.58
   4  10   5   18.76    2.21
   4  10   6  270.93   11.99
   4 -10   6  260.49   12.35
  -4 -10  -6  237.70   16.12
  -4 -10  -6  254.12   12.77
   4  10   6  253.77   12.84
   4  10   6  253.42   12.63
  -4 -10  -6  243.14   12.87
   4  10   7    4.25    2.03
   4 -10   7    4.74    2.15
  -4 -10  -7    4.81    3.95
  -4 -10  -7    4.53    2.30
   4  10   7    3.07    2.53
   4  10   7    3.79    2.37
  -4 -10  -7    3.84    2.83
   4  10   8  107.08    5.94
   4 -10   8  114.80    6.39
  -4 -10  -8   84.89    9.35
  -4 -10  -8  112.52    6.58
  -4 -10  -8   99.70    6.78
   4  10   8  110.05    6.30
   4  10   8  110.14    6.77
   4  10   9   29.80    2.94
  -4 -10  -9   36.30    3.84
   4 -10   9   39.85    3.56
   4  10   9   38.72    3.95
   4  10   9   41.41    3.23
   4 -10  10   73.30    4.79
   4  10  10   79.19    5.41
   4  10  10   78.59    4.56
   4 -10  11    2.07    1.93
   4  10  11    3.56    1.85
   4  10  11    3.43    2.26
   4  10  12   18.58    1.94
   4 -10  12   21.59    2.15
  -4 -10 -12   19.39    2.47
   4 -11 -12    8.88    1.75
  -4 -11  12    8.29    1.81
  -4 -11  11   67.34    4.35
  -4 -11  11   61.05    4.17
   4 -11 -11   66.11    4.45
  -4 -11  10   22.32    2.93
  -4 -11   9   10.96    2.66
  -4  11   9    9.76    2.49
  -4 -11   8   13.87    2.88
  -4  11   8   12.27    2.60
   4 -11  -7  240.59   12.73
  -4  11   7  256.20   12.29
   4 -11  -6   71.20    5.55
  -4  11   6   82.58    5.16
   4 -11  -5  358.09   17.89
  -4  11   5  367.23   16.91
   4  11  -4   72.75    4.53
   4 -11  -4   83.22    5.79
  -4 -11   4   74.83    5.85
   4 -11  -3   76.42    4.94
   4  11  -3   82.35    4.87
   4 -11  -3   79.40    5.78
  -4 -11   3   71.99    5.74
   4 -11  -2  197.91   10.82
   4 -11  -2  187.51    9.71
   4  11  -2  189.25    9.76
   4 -11  -2  208.28    9.70
  -4 -11   2  193.37   10.59
   4 -11  -1  133.75    8.05
   4  11  -1  125.21    7.10
   4 -11  -1  126.00    7.03
   4 -11  -1  134.54    6.76
  -4 -11   1  135.48    7.76
   4  11   0  116.20    6.72
   4  11   0  117.68    6.43
   4 -11   0  121.14    6.77
  -4 -11   0  118.34    6.46
  -4 -11   0  132.74    7.43
   4 -11   1  114.47    7.07
   4  11   1  109.32    6.30
   4  11   1  108.15    5.88
   4 -11   1  100.86    6.31
  -4 -11  -1   99.64    6.62
  -4 -11  -1  107.90    6.01
   4  11   2   19.32    2.88
  -4 -11  -2   17.47    2.53
   4  11   2   19.93    2.55
  -4 -11  -2   22.53    3.13
   4 -11   2   22.26    3.16
  -4 -11  -3    5.15    2.13
   4  11   3    3.14    2.07
   4 -11   3    2.82    2.16
  -4 -11  -3    1.49    2.26
   4 -11   4   35.38    3.83
   4  11   4   38.50    3.70
  -4 -11  -4   34.90    3.60
   4  11   4   39.61    3.57
  -4 -11  -4   40.94    3.91
   4  11   4   39.00    2.69
   4  11   5  431.05   18.55
   4 -11   5  381.08   19.71
   4  11   5  415.74   19.48
  -4 -11  -5  428.41   19.78
  -4 -11  -5  429.01   19.72
   4  11   5  395.69   19.35
   4 -11   5  430.20   18.90
   4  11   6   66.63    4.95
   4  11   6   74.17    4.24
  -4 -11  -6   74.00    5.08
   4 -11   6   70.76    4.49
   4  11   6   63.99    4.99
   4  11   7  247.56   13.31
   4  11   7  271.59   13.22
   4  11   7  269.74   12.51
  -4 -11  -7  266.59   13.43
   4 -11   7  294.42   12.98
  -4 -11  -7  269.29   13.61
   4  11   8   42.30    3.96
   4  11   8   38.89    3.57
   4  11   8   39.52    3.14
  -4 -11  -8   41.63    3.75
   4 -11   8   42.07    3.48
  -4 -11  -8   37.17    4.05
   4 -11   9   61.21    4.10
   4  11   9   57.43    4.53
   4  11   9   64.10    3.84
   4  11   9   48.96    3.78
   4  11  10    3.32    2.36
   4 -11  10    8.08    2.07
   4  11  10    8.44    1.86
   4 -11  11    6.35    1.75
   4  11  11    2.29    1.47
   4  11  12    4.71    1.22
  -4 -11 -12    6.56    1.67
  -4 -12  12   22.19    2.03
   4 -12 -12   22.20    2.11
   4 -12 -12   23.60    1.93
   4 -12 -11   27.76    2.74
  -4 -12  11   24.19    2.50
  -4 -12  11   21.87    2.23
   4 -12 -10   27.41    3.09
  -4 -12  10   30.26    2.80
  -4  12   9    7.42    2.17
  -4 -12   9    7.53    2.22
  -4 -12   8  242.60   11.81
  -4  12   8  232.92   11.55
  -4 -12   7   34.80    4.13
   4 -12  -7   30.59    3.55
  -4  12   7   33.55    3.17
  -4 -12   6   37.06    4.15
  -4  12   6   41.96    3.52
   4 -12  -6   36.51    4.00
  -4  12   5    2.40    2.12
   4 -12  -5    2.18    2.43
   4 -12  -4   52.12    4.16
  -4  12   4   57.83    4.07
   4 -12  -4   55.52    4.30
   4  12  -4   53.92    3.79
   4 -12  -4   60.82    5.00
   4  12  -3   13.07    2.39
  -4 -12   3   22.17    3.74
   4 -12  -3   16.41    2.73
   4 -12  -3   21.74    3.27
   4 -12  -3   19.84    2.50
   4 -12  -2  147.25    9.01
   4  12  -2  150.24    7.94
   4 -12  -2  147.81    7.92
   4 -12  -2  147.48    7.80
  -4 -12   2  158.42    8.87
   4  12  -1  390.84   17.56
   4  12  -1  371.96   17.18
   4 -12  -1  371.09   17.47
  -4 -12   1  405.82   18.36
   4 -12  -1  362.17   17.06
   4 -12  -1  369.57   18.60
   4  12   0  155.23    8.25
   4  12   0  150.84    7.75
   4 -12   0  137.15    8.06
  -4 -12   0  157.51    7.85
  -4 -12   0  158.24    8.79
   4  12   1    1.03    2.25
   4 -12   1    0.18    2.54
   4  12   1    2.00    1.83
  -4 -12  -1    2.64    1.87
   4 -12   1    2.77    2.61
   4  12   2   84.00    5.44
  -4 -12  -2   83.43    5.24
   4  12   2   80.47    4.97
  -4 -12  -2   78.43    5.73
   4 -12   2   76.69    6.06
   4  12   3   13.62    2.84
   4  12   3   12.91    2.42
  -4 -12  -3   12.82    2.60
   4 -12   3   14.56    2.98
  -4 -12  -3   15.02    3.01
  -4 -12  -4  172.30    9.24
   4  12   4  169.86    8.80
  -4 -12  -4  164.47    9.31
   4 -12   4  168.68    9.58
   4  12   5  177.06    9.04
  -4 -12  -5  157.75    9.10
   4  12   5  159.04    8.71
  -4 -12  -5  167.42    9.23
   4 -12   5  161.16    9.17
   4  12   6   14.27    2.03
   4  12   6   16.92    2.93
   4  12   6   12.18    2.83
  -4 -12  -6   14.29    2.90
   4 -12   6   14.36    2.20
  -4 -12  -6   18.89    3.37
   4  12   7    4.37    2.36
   4  12   7    4.94    2.65
  -4 -12  -7    1.01    2.28
   4 -12   7    5.84    1.97
   4  12   7    3.98    1.75
   4  12   8   69.59    5.19
   4  12   8   78.39    5.08
   4  12   8   84.81    4.58
  -4 -12  -8   91.95    5.53
   4 -12   8   80.41    4.80
  -4 -12  -8   82.96    5.60
   4  12   9   82.59    5.04
   4 -12   9   92.66    5.05
  -4 -12  -9   86.46    5.40
   4  12   9   91.75    4.79
   4  12   9   84.87    5.42
   4  12  10   18.45    1.97
   4  12  10   26.50    2.70
   4  12  11    2.43    1.19
  -4 -12 -11    5.00    1.95
  -4 -13  11    3.90    1.24
   4 -13 -11    2.95    1.38
   4 -13 -11    4.00    1.53
  -4 -13  11    3.74    1.44
  -4 -13  10    3.49    1.65
  -4 -13  10    5.28    1.85
   4 -13 -10    5.71    1.96
  -4 -13   9   47.39    3.49
   4 -13  -8   93.62    5.83
  -4  13   8   90.54    5.26
  -4 -13   8   86.98    5.36
  -4  13   7   95.20    5.58
  -4 -13   7   98.11    6.49
   4 -13  -7   98.43    6.07
   4 -13  -7   95.76    6.33
  -4  13   6  217.39   10.85
  -4 -13   6  236.30   11.80
   4 -13  -6  218.58   11.24
   4 -13  -6  216.87   11.85
   4 -13  -6  227.99   11.26
  -4  13   5   34.03    3.09
   4 -13  -5   31.52    3.53
  -4 -13   5   41.25    4.21
   4 -13  -5   35.12    3.46
   4 -13  -5   38.59    4.23
  -4  13   4    2.54    1.97
  -4 -13   4    2.48    2.55
   4 -13  -4    3.15    2.10
   4 -13  -4    5.96    2.90
   4 -13  -4    8.82    2.42
   4 -13  -3  112.79    7.60
   4 -13  -3  111.56    6.67
   4 -13  -3  121.93    6.72
   4  13  -3  116.45    6.45
  -4 -13   3  122.92    7.71
   4 -13  -2   18.27    2.44
   4 -13  -2   16.64    2.86
  -4 -13   2   21.70    3.50
   4 -13  -2   13.87    3.43
   4  13  -2   14.33    2.47
   4 -13  -1   17.54    2.17
   4 -13  -1   16.63    2.81
  -4 -13   1   17.76    3.44
   4  13  -1   19.33    2.47
   4 -13  -1   19.88    3.47
   4  13  -1   13.31    2.60
   4 -13   0  264.30   13.51
  -4 -13   0  289.63   13.26
   4  13   0  296.40   13.68
  -4 -13   0  300.44   14.35
   4  13   0  261.59   13.08
   4 -13   1   21.31    3.58
   4  13   1   26.03    3.36
   4  13   1   24.18    2.71
  -4 -13  -1   25.86    2.82
   4  13   2    1.27    2.57
  -4 -13  -2    4.10    2.10
   4  13   2   -0.84    1.87
  -4 -13  -2    0.24    2.60
   4 -13   2   -0.29    2.55
   4  13   3  416.63   19.28
  -4 -13  -3  413.21   19.65
   4 -13   3  387.57   19.87
   4  13   3  402.68   18.73
  -4 -13  -3  428.47   19.23
  -4 -13  -4   -0.45    2.50
   4 -13   4    0.52    2.40
   4  13   4    1.87    2.16
  -4 -13  -4    1.98    2.42
   4  13   5  164.82    8.66
  -4 -13  -5  148.37    8.74
   4 -13   5  146.51    8.70
  -4 -13  -5  156.28    8.76
   4  13   5  160.52    8.34
   4  13   6   72.89    5.16
  -4 -13  -6   81.88    5.70
  -4 -13  -6   87.51    5.70
   4  13   6   78.98    5.38
   4  13   7   21.73    2.93
  -4 -13  -7   19.62    2.86
   4  13   7   20.10    2.89
   4  13   8   16.10    2.58
  -4 -13  -8   15.40    2.59
   4  13   8   14.56    2.42
   4  13   9  153.88    7.89
  -4 -13  -9  155.89    8.03
   4  13  10    4.11    1.72
  -4 -13 -11   52.52    3.53
  -4 -14  10   13.99    1.61
   4 -14 -10   12.34    1.74
  -4 -14   9    5.61    1.63
   4 -14  -9    6.53    1.92
   4 -14  -8   11.75    2.33
  -4 -14   8   12.60    2.09
   4 -14  -8   12.30    2.47
  -4  14   7   24.18    2.56
   4 -14  -7   27.42    3.04
  -4 -14   7   22.87    2.58
   4 -14  -7   27.08    3.14
  -4 -14   7   20.39    3.13
   4 -14  -7   24.79    3.14
   4 -14  -6    1.48    2.49
   4 -14  -6    2.11    2.30
   4 -14  -6    5.80    2.27
  -4 -14   6    2.86    2.57
  -4  14   6    2.55    1.82
  -4  14   5    1.44    1.77
   4 -14  -5    1.41    2.10
   4 -14  -5    4.45    2.28
   4 -14  -5   -1.34    2.53
  -4 -14   5    4.46    2.66
  -4  14   4    8.14    2.00
   4 -14  -4    6.21    2.33
   4 -14  -4    6.82    2.36
  -4 -14   4   10.34    2.89
   4 -14  -4    9.23    2.81
   4 -14  -3    1.32    2.05
  -4  14   3    2.23    1.84
   4 -14  -3    2.01    2.29
   4 -14  -3   -2.01    2.60
   4  14  -3    1.80    1.81
   4 -14  -2   80.09    5.77
   4 -14  -2   95.65    6.86
   4 -14  -2  103.37    5.67
  -4 -14   2  106.95    6.89
   4  14  -2   93.41    5.69
   4  14  -2   95.92    5.46
  -4 -14   1   31.49    3.85
   4  14  -1   27.01    2.70
   4 -14  -1   26.44    2.60
   4  14  -1   26.26    3.06
   4 -14  -1   31.59    4.02
   4  14   0   80.32    5.25
  -4 -14   0   81.24    6.02
   4  14   0   80.42    4.81
   4 -14   1   25.08    3.84
   4  14   1   20.22    2.68
  -4 -14  -1   27.68    2.78
  -4 -14  -1   18.76    3.42
   4  14   1   22.31    3.16
  -4 -14  -2   13.45    2.48
   4  14   2   15.74    2.97
   4 -14   2   12.26    3.24
   4  14   2   13.86    2.29
   4  14   3   55.72    4.51
  -4 -14  -3   42.67    4.44
   4 -14   3   56.75    4.93
   4  14   3   50.99    3.85
  -4 -14  -3   47.65    4.00
  -4 -14  -4   83.07    6.00
   4 -14   4   83.20    5.98
   4  14   4   92.74    5.35
  -4 -14  -4   78.86    5.58
   4  14   5  179.61    9.52
  -4 -14  -5  191.14    9.85
   4 -14   5  162.95    9.55
  -4 -14  -5  181.80    9.66
   4  14   5  179.61    9.11
   4  14   6   81.02    5.01
  -4 -14  -6   72.63    5.34
  -4 -14  -6   70.76    5.29
   4  14   6   78.29    5.24
   4  14   7   11.71    2.25
  -4 -14  -7    9.28    2.45
   4  14   7    6.95    2.33
   4  14   8    4.48    1.94
  -4 -14  -8    7.26    2.12
   4  14   8    6.10    1.96
   4  14   9    2.10    1.64
  -4 -14 -10   15.43    2.16
  -4 -15  10    0.80    1.09
   4 -15 -10    1.10    1.13
   4 -15  -9   32.94    2.80
  -4 -15   9   37.44    2.69
   4 -15  -9   30.58    2.54
   4 -15  -8    3.85    1.88
  -4 -15   8    0.38    1.34
   4 -15  -8    1.68    1.79
  -4 -15   7   53.09    3.57
   4 -15  -7   61.02    3.98
   4 -15  -7   46.06    3.97
   4 -15  -7   59.98    4.13
  -4  15   7   56.71    3.50
  -4  15   6   49.54    3.33
  -4 -15   6   46.96    4.05
   4 -15  -6   54.08    3.89
   4 -15  -6   47.65    3.84
   4 -15  -6   41.29    4.13
   4 -15  -5  166.03    9.83
  -4  15   5  171.60    8.60
   4 -15  -5  201.02    9.11
   4 -15  -5  167.81    9.10
  -4 -15   5  177.57    9.48
   4 -15  -5  173.77    9.12
   4 -15  -4   -0.50    2.00
  -4  15   4    1.40    1.64
  -4 -15   4    0.60    2.53
   4  15  -4    1.70    2.00
   4 -15  -4    0.80    2.62
   4  15  -3   42.55    3.37
   4  15  -3   48.20    3.53
  -4 -15   3   50.60    4.36
   4 -15  -3   46.39    4.56
   4 -15  -3   49.46    3.69
   4  15  -2   18.99    2.62
   4 -15  -2   22.38    3.72
   4  15  -2   20.80    2.58
   4 -15  -2   20.21    2.51
   4 -15  -1   87.94    6.79
   4  15  -1   91.96    5.31
   4  15  -1   93.36    5.67
  -4 -15   1   96.59    6.63
   4 -15   0   47.23    5.04
   4  15   0   59.14    3.89
   4  15   0   59.36    4.38
  -4 -15   0   58.68    5.13
   4  15   1   99.06    5.87
   4  15   1   90.94    5.26
   4 -15   1   91.11    6.70
  -4 -15  -1   78.48    5.18
  -4 -15  -1  103.05    6.57
  -4 -15  -2   31.72    3.95
   4  15   2   22.29    3.30
   4 -15   2   19.08    3.57
  -4 -15  -2   25.83    2.87
   4  15   2   28.09    2.82
   4  15   3   36.87    3.74
   4  15   3   36.40    3.22
  -4 -15  -3   34.04    3.36
   4 -15   3   32.55    3.98
   4  15   4    6.26    2.17
  -4 -15  -4    4.58    2.42
   4 -15   4    3.30    2.30
  -4 -15  -4    2.98    2.15
  -4 -15  -5   95.08    6.16
   4  15   5   89.72    5.73
   4  15   5   90.50    5.37
  -4 -15  -6    0.19    2.10
   4  15   6    0.78    2.15
   4  15   6    1.62    1.88
  -4 -15  -7  214.78   10.45
   4  15   7  201.41   10.04
   4  15   7  202.71    9.83
  -4 -15  -8    3.52    1.79
   4  15   8    1.96    1.58
   4  15   8    2.31    1.60
   4 -16  -9    9.26    1.48
  -4 -16   9   11.23    1.44
   4 -16  -9   12.59    1.68
   4 -16  -8   29.01    2.53
   4 -16  -8   29.11    2.65
   4  16  -8   35.40    2.35
   4 -16  -7    4.09    1.79
   4 -16  -7   -0.15    1.65
   4  16  -7    0.63    1.45
   4 -16  -7    2.14    1.71
   4  16  -6   37.42    2.81
  -4 -16   6   34.23    3.15
   4 -16  -6   33.50    3.01
   4 -16  -6   34.06    3.44
   4  16  -5   59.78    3.70
  -4 -16   5   50.58    4.05
   4 -16  -5   50.26    4.51
   4 -16  -5   54.54    3.98
   4 -16  -4    3.76    2.11
  -4 -16   4    7.06    2.46
   4  16  -4    7.83    1.99
   4 -16  -4    6.66    2.80
   4  16  -3   35.94    2.88
  -4 -16   3   30.71    3.41
   4 -16  -3   26.67    3.76
   4 -16  -3   25.11    2.75
   4  16  -2   78.28    4.47
   4 -16  -2   70.52    5.58
   4  16  -2   67.88    4.42
   4  16  -1   13.50    2.39
   4  16  -1   14.45    2.18
   4 -16  -1   10.63    3.19
   4 -16   0   92.86    6.45
   4  16   0   84.09    5.33
   4  16   0   86.36    5.01
   4  16   1    1.21    1.83
  -4 -16  -1    1.13    2.65
   4 -16   1    1.35    2.72
   4  16   1    4.50    2.34
   4  16   2  161.38    7.92
  -4 -16  -2  156.24    8.86
   4  16   2  149.07    8.32
   4 -16   2  154.77    9.15
   4  16   3    5.74    1.99
  -4 -16  -3    7.28    2.74
   4  16   3    7.54    2.56
   4 -16   3    4.75    2.47
   4  16   4   61.83    4.59
   4 -16   4   54.36    4.59
   4  16   4   71.11    4.18
   4  16   5    2.32    1.66
   4  16   6  305.30   14.17
   4  16   6  301.86   13.79
   4  16   7    2.76    1.65
   4  16   7    0.99    1.34
   4  16   8    3.48    1.16
  -4 -16  -8    3.56    1.85
   4  16   8    3.07    1.37
   4 -17  -8   21.87    1.91
  -4 -17   8   19.27    1.74
   4 -17  -7   20.03    2.06
   4 -17  -6    1.44    1.73
   4 -17  -6    5.53    1.68
   4 -17  -5    1.54    2.09
  -4 -17   5    3.37    1.81
   4 -17  -5    3.97    1.73
   4  17  -5    2.65    1.50
   4  17  -4    8.62    1.72
  -4 -17   4    8.05    2.20
   4 -17  -4    8.41    2.56
   4 -17  -3   28.74    3.51
   4  17  -3   31.27    2.67
  -4 -17   2    2.53    2.75
   4  17  -2    1.85    1.58
   4  17  -2    3.41    1.69
   4 -17  -2    2.18    2.62
  -4 -17   2    4.36    2.20
   4  17  -1   19.05    2.43
   4  17  -1   23.80    2.37
   4 -17   0   34.61    3.95
   4  17   0   34.32    3.19
   4  17   0   40.75    2.96
   4 -17   1    9.02    2.79
   4  17   1   10.26    1.98
   4  17   1   10.06    2.26
   4  17   2    3.37    2.16
   4 -17   2   -1.15    2.36
   4  17   2   -0.21    1.61
  -4 -17  -2    2.83    2.51
   4  17   3   45.20    3.51
   4 -17   3   36.46    3.67
   4  17   3   36.38    2.93
  -4 -17  -3   44.54    3.87
   4  17   4   56.38    4.06
   4  17   4   56.45    3.52
  -4 -17  -4   61.04    4.52
  -4 -17  -5    6.21    2.30
  -4 -17  -6    9.35    2.17
   4  17   6   10.72    1.87
  -4 -17  -7    6.01    1.72
   4  17   7    4.94    1.42
  -4 -17  -7    4.35    1.69
   4 -18  -5   22.19    2.58
  -4 -18   4   48.35    3.37
   4 -18  -4   49.19    3.91
  -4 -18   3    2.47    1.77
   4 -18  -3    0.79    2.12
  -4 -18   2   92.49    5.41
   4 -18  -2   91.07    5.93
  -4 -18   1  107.67    5.97
   4  18  -1   96.25    5.42
  -4 -18   1  115.69    6.53
   4  18   0    3.09    1.70
   4 -18   0    0.86    2.08
   4  18   1   30.94    2.83
   4 -18   1   27.34    3.31
   4  18   2   26.48    2.54
   4 -18   2   21.39    2.86
   4  18   3   15.28    2.27
   4 -18   3   14.67    2.41
  -4 -18  -4   19.69    2.76
   4  18   4   21.08    2.34
  -4 -18  -5    4.73    1.79
  -4 -18  -6   23.21    2.00
   4  18   6   26.06    2.16
  -4 -18  -6   29.83    2.56
   4 -19  -4    2.10    1.60
  -4 -19   3   39.19    2.68
   4 -19  -3   34.47    3.23
  -4 -19   2   -1.26    1.43
   4 -19  -2   -1.36    1.87
  -4 -19   1   13.38    1.91
  -4 -19   0    2.76    1.96
  -4 -19   0    3.32    1.63
   4  19   0    1.78    1.41
   4 -19   0    0.88    1.91
  -4 -19  -1   37.03    2.88
   4  19   1   35.84    2.77
  -4 -19  -1   47.24    3.52
   4 -19   1   40.01    3.46
   4  19   2   25.50    2.25
   4 -19   2   23.11    2.57
   4  19   3    2.72    1.47
   4  19   4   23.60    2.10
  -4 -19  -4   23.70    2.37
   5   0 -14   -1.19    1.90
  -5   0  14    0.25    1.51
   5   0 -13   81.30    5.59
  -5   0  13   63.60    4.60
   5   0 -12    1.69    2.99
  -5   0  12    0.63    2.27
   5   0 -11  487.58   23.64
  -5   0  10    3.14    3.52
   5   0 -10   -1.61    3.17
  -5   0  10    1.69    1.89
  -5   0  10   -2.09    5.68
   5   0  -9   21.51    3.96
  -5   0   9   20.93    4.69
  -5   0   9   28.51    2.74
  -5   0   9   19.61    6.09
  -5   0   9   28.67    2.80
   5   0  -8    1.23    2.95
  -5   0   8    0.97    1.78
  -5   0   8    3.05    5.05
  -5   0   8   -1.92    3.64
  -5   0   8   -0.13    1.71
  -5   0   7  131.15   13.30
  -5   0   7  170.43    8.34
  -5   0   7  161.87   10.91
   5   0  -7  164.06    9.77
  -5   0   7  163.11    8.21
  -5   0   6    0.41    3.09
   5   0  -6    0.54    2.37
  -5   0   6    2.83    4.20
  -5   0   6    1.17    2.11
  -5   0   6   -0.79    1.67
  -5   0   5  365.00   25.47
  -5   0   5  495.83   22.95
  -5   0   5  370.54   20.93
   5   0  -5  473.76   21.59
   5   0  -5  500.91   20.32
  -5   0   4   -0.42    1.71
  -5   0   4   -0.84    3.66
  -5   0   4    0.98    2.52
   5   0  -4    0.20    1.27
  -5   0   3   82.53    5.93
   5   0  -3   92.86    8.66
   5   0  -3   76.83    4.29
   5   0  -2    1.55    1.16
   5   0  -2    4.07    3.16
  -5   0   2   -1.32    2.03
  -5   0   2   -0.72    3.01
   5   0  -1 1920.63   82.42
   5   0  -1 2052.05   87.03
   5   0   0    0.09    1.20
   5   0   0    8.65    3.42
   5   0   1   60.01    3.52
   5   0   1   58.57    3.47
   5   0   1   69.87    6.69
   5   0   2    2.90    1.28
   5   0   2    1.66    1.13
   5   0   3  265.48   12.52
   5   0   3  278.97   16.80
   5   0   3  276.88   12.51
   5   0   3  284.82   12.58
   5   0   4    0.99    1.42
   5   0   4    2.22    1.39
   5   0   4    0.28    1.22
   5   0   5   81.40    4.17
   5   0   5   67.44    4.24
   5   0   5   70.49    7.38
   5   0   6    0.21    1.63
   5   0   6    1.60    1.58
   5   0   6   -0.34    1.09
   5   0   6   -2.21    3.67
   5   0   6    0.86    2.20
   5   0   7   18.93    2.36
   5   0   7   19.35    3.08
   5   0   7   22.77    3.09
   5   0   7   27.97    5.77
   5   0   7   19.52    2.49
   5   0   8   -1.77    2.06
   5   0   8    2.51    2.45
   5   0   8   -1.34    2.39
   5   0   8    3.22    4.25
   5   0   8    2.28    2.17
   5   0   9   75.99    4.74
   5   0   9   69.64    4.54
   5   0   9   77.27    5.28
   5   0   9   64.04    7.87
   5   0   9   62.21    5.15
   5   0  10    1.63    2.14
   5   0  10   -0.88    2.26
   5   0  10    3.93    3.03
   5   0  10   -1.39    4.50
   5   0  10    0.44    2.59
   5   0  11   21.67    2.68
   5   0  11   23.75    2.74
   5   0  11   25.48    3.50
   5   0  11   16.29    3.07
   5   0  12    1.11    1.81
   5   0  12    2.18    1.84
   5   0  12   -0.68    2.08
   5   0  13  115.00    5.63
   5   0  13  110.72    5.54
   5   0  13  105.21    5.98
   5   0  14    0.34    1.06
  -5   1  14    2.70    1.55
   5   1 -14    3.89    1.97
  -5   1  13   -0.67    1.97
   5   1 -13    2.26    2.42
  -5   1  12  228.78   12.34
   5   1 -12  267.06   13.27
   5   1 -11   52.91    5.29
  -5   1  11   43.06    8.04
  -5  -1  11   48.41    8.25
  -5  -1  11   54.37    3.90
  -5   1  10   17.48    6.52
   5   1 -10   18.12    4.08
  -5   1  10   32.47    3.17
  -5  -1  10   31.30    5.35
  -5   1  10   25.82    5.04
  -5  -1  10   26.76    3.03
  -5   1  10   41.54    3.04
   5   1  -9   19.30    3.83
  -5   1   9   14.43    2.63
  -5  -1   9   13.93    2.08
  -5  -1   9   18.68    4.67
  -5   1   9   19.49    4.62
  -5   1   9    6.07    4.98
  -5   1   9   16.13    2.14
  -5  -1   9   15.26    2.48
   5   1  -8    5.78    3.18
  -5  -1   8    6.20    3.79
  -5   1   8    8.24    3.56
  -5  -1   8    8.27    1.83
  -5   1   8    9.69    2.18
  -5   1   8    7.98    4.80
  -5   1   8    7.22    1.73
  -5  -1   8   11.74    2.06
  -5  -1   7    5.25    1.60
  -5   1   7    2.16    1.80
  -5  -1   7   -0.44    3.34
  -5   1   7   -1.34    3.41
  -5   1   7   -6.76    5.33
  -5   1   7    2.08    1.52
   5   1  -7    2.85    2.84
  -5  -1   6  759.29   36.06
  -5   1   6  753.53   36.00
  -5   1   6  639.81   39.21
   5   1  -6  766.24   34.72
  -5   1   6  782.08   33.15
  -5  -1   6  771.76   33.19
  -5   1   6  655.78   34.06
   5   1  -6  823.58   33.46
  -5  -1   5  179.68    8.27
  -5   1   5  144.51    8.99
  -5  -1   5  172.66   10.46
  -5   1   5  181.13   10.59
   5   1  -5  164.37    9.28
   5   1  -5  173.53    8.24
   5  -1  -5  165.76    8.20
  -5   1   4  108.66   10.77
   5   1  -4  127.97    6.57
   5  -1  -4  133.46    6.61
  -5  -1   4  126.35    8.43
  -5   1   4  137.22    8.51
  -5  -1   4  146.60    6.65
  -5   1   4  110.23    7.24
  -5  -1   3   41.25    4.08
  -5   1   3   38.95    4.00
   5  -1  -3   37.51    2.61
   5   1  -3   37.42    2.61
   5   1  -3   26.50    5.34
  -5  -1   3   37.69    2.53
   5   1  -3   37.89    2.64
   5   1  -2  247.72   11.21
   5  -1  -2  238.97   11.15
  -5  -1   2  247.76   12.89
  -5   1   2  251.77   12.76
   5   1  -2  273.86   15.61
  -5   1   1    2.33    2.05
   5   1  -1    5.74    3.14
   5   1  -1   -0.10    1.22
   5   1   0  242.52   11.23
   5   1   0  264.69   14.98
   5   1   1   55.08    3.23
   5  -1   1   49.38    3.21
   5   1   1   59.01    6.25
   5   1   1   56.78    3.32
   5  -1   1   51.82    3.22
   5   1   2   16.39    1.75
   5  -1   2   14.02    1.62
   5   1   2   14.18    1.70
   5  -1   2   14.21    1.73
   5   1   2   11.86    3.77
   5  -1   3    2.79    1.28
   5   1   3    2.52    1.31
   5   1   3    3.46    3.05
   5   1   3    3.69    1.36
   5  -1   3    3.38    1.41
   5   1   4  836.19   35.90
   5  -1   4  855.32   35.82
   5  -1   4  840.25   35.79
   5   1   4  786.70   35.86
   5   1   5  299.35   13.81
   5   1   5  301.62   17.37
   5   1   5  280.18   13.60
   5  -1   5  304.87   13.60
   5   1   5  310.91   13.60
   5   1   6  302.24   13.92
   5   1   6  322.15   18.31
   5   1   6  315.56   14.19
   5  -1   6  311.06   14.08
   5   1   6  327.60   14.60
   5  -1   6  297.11   14.11
   5  -1   6  309.50   14.18
   5   1   6  306.45   14.37
   5  -1   7  331.86   15.04
   5   1   7  321.75   15.21
   5   1   7  324.13   14.98
   5  -1   7  323.55   14.86
   5   1   7  342.96   15.47
   5   1   7  312.77   19.07
   5  -1   7  318.68   14.96
   5  -1   7  325.68   15.66
   5  -1   8   34.76    3.23
   5   1   8   35.10    3.42
   5  -1   8   41.82    3.38
   5  -1   8   42.83    4.02
   5   1   8   41.68    3.92
   5   1   8   40.63    3.43
   5  -1   8   42.64    3.24
   5   1   8   40.34    3.90
   5   1   8   48.70    6.93
   5  -1   9   11.83    2.42
   5   1   9   14.12    2.67
   5   1   9   14.60    3.20
   5   1   9   12.17    5.30
   5  -1   9   11.96    2.28
   5   1   9   14.63    2.68
   5  -1   9    9.95    2.22
   5  -1   9   11.75    3.13
   5   1   9   10.37    2.81
   5   1  10  181.74    9.00
   5  -1  10  157.13    9.34
   5  -1  10  169.91    8.56
   5   1  10  176.64    8.71
   5  -1  10  168.88    8.47
   5   1  10  186.11    9.28
   5   1  10  181.07   13.34
   5  -1  11   -0.62    2.71
   5   1  11   -1.34    2.30
   5   1  11    3.25    2.67
   5   1  11    1.59    2.16
   5  -1  11   -1.57    2.03
   5   1  11    2.87    2.24
   5  -1  11    0.11    1.90
   5   1  12  112.52    6.71
   5  -1  12  102.45    6.81
   5  -1  12  126.66    6.22
   5   1  12  133.99    6.50
   5  -1  12  125.74    6.30
   5   1  12  122.15    6.44
   5   1  13   47.04    3.31
   5  -1  13   42.77    3.52
   5   1  13   59.60    3.29
   5   1  13   54.36    3.27
   5  -1  13   48.82    3.02
   5  -1  14   67.42    3.76
   5   2 -14   14.80    2.25
  -5   2  14   12.36    1.91
  -5  -2  14   12.86    1.82
   5   2 -13   28.56    3.37
  -5   2  13   23.76    2.83
  -5  -2  13   31.79    3.03
   5   2 -12    1.31    2.73
  -5   2  12    4.01    2.48
  -5  -2  12    2.29    2.33
   5   2 -11  247.28   13.18
  -5  -2  11  247.01   11.83
  -5   2  11  226.01   17.49
  -5  -2  11  218.11   17.26
  -5   2  10   10.75    2.58
  -5   2  10   13.43    4.56
  -5  -2  10   12.64    4.25
   5   2 -10   13.49    3.54
   5  -2 -10    9.98    3.79
  -5  -2  10    9.44    2.28
  -5   2  10    1.95    5.39
  -5  -2  10    4.77    5.62
   5  -2  -9   32.50    4.48
   5   2  -9   25.13    4.00
  -5  -2   9   34.33    2.77
  -5   2   9   30.10    3.34
  -5   2   9   35.81    2.84
  -5  -2   9   32.85    3.30
  -5   2   9   32.50    6.91
  -5  -2   9   32.38    7.04
  -5  -2   9   29.01    5.05
  -5   2   9   36.87    5.60
   5   2  -8   11.81    3.47
   5  -2  -8   19.66    3.64
  -5  -2   8   19.05    4.39
  -5   2   8   17.04    4.36
  -5  -2   8   18.44    2.05
  -5  -2   8   20.50    2.72
  -5   2   8   23.03    2.28
  -5   2   8   17.90    6.15
  -5  -2   8   24.38    6.47
  -5   2   8   20.04    2.94
   5   2  -7    3.60    2.53
   5  -2  -7    3.99    2.74
  -5  -2   7    3.26    1.32
  -5   2   7    2.81    1.39
  -5   2   7    3.65    5.17
  -5  -2   7    1.82    4.59
  -5  -2   7    4.01    3.52
  -5   2   7    4.03    3.17
  -5   2   7    2.47    2.14
  -5   2   6  535.34   32.06
  -5  -2   6  598.05   32.81
  -5  -2   6  607.33   28.91
  -5   2   6  599.29   28.84
  -5   2   6  619.86   25.89
   5   2  -6  615.95   26.28
  -5   2   6  585.09   27.03
  -5  -2   6  587.88   25.81
  -5  -2   6  586.27   27.03
   5   2  -6  547.79   27.26
   5  -2  -6  543.63   27.31
  -5   2   5  232.51   12.45
  -5  -2   5  250.13   12.52
  -5  -2   5  265.70   11.76
   5   2  -5  246.90   12.70
   5  -2  -5  246.93   12.73
  -5  -2   5  261.70   14.13
  -5   2   5  247.39   13.92
  -5   2   5  234.56   16.98
  -5  -2   5  249.08   17.19
   5   2  -5  249.65   11.64
   5  -2  -5  238.07   11.59
   5   2  -4   36.98    2.66
   5  -2  -4   34.77    2.71
  -5   2   4   31.95    4.10
  -5  -2   4   35.24    4.32
  -5   2   4   33.54    3.36
  -5  -2   4   31.62    3.25
  -5   2   4   42.12    6.54
  -5  -2   4   31.38    5.76
  -5  -2   4   43.41    2.82
  -5  -2   3  146.63    8.64
   5   2  -3  132.54   10.63
   5  -2  -3  142.59   10.83
  -5   2   3  127.13    8.16
  -5  -2   3  140.22    6.75
  -5   2   3  129.65   10.95
  -5  -2   3  124.25   10.76
   5   2  -3  133.20    6.66
   5  -2  -3  128.80    6.65
   5   2  -3  131.60    6.61
  -5   2   2  174.43   13.30
  -5  -2   2  169.17   13.16
  -5  -2   2  183.52   10.78
   5   2  -2  218.65   13.29
   5  -2  -2  204.63   12.94
  -5   2   2  207.90   10.63
   5  -2  -2  195.82    9.09
   5   2  -2  185.12    9.07
  -5   2   1  534.56   24.02
   5   2  -1  497.07   26.07
   5  -2  -1  533.90   26.38
   5   2  -1  498.56   22.41
   5  -2   0  245.93   11.37
   5   2   0  246.14   11.35
   5   2   0  249.07   14.86
   5  -2   0  265.22   15.08
   5   2   0  251.19   11.47
   5   2   1  103.72    5.48
   5  -2   1  107.04    5.54
   5  -2   1  119.06    8.88
   5   2   1  109.33    5.59
   5   2   2  106.13    5.70
   5   2   2  118.88    9.08
   5  -2   2  115.19    9.14
   5   2   2  121.30    5.90
   5   2   3  572.35   29.51
   5  -2   3  601.95   29.78
   5   2   3  569.74   25.24
   5   2   3  573.57   25.32
   5   2   3  586.20   25.26
   5  -2   4   26.37    2.39
   5   2   4   32.29    2.54
   5   2   4   29.55    2.38
   5   2   5   43.94    3.27
   5  -2   5   43.32    3.06
   5   2   5   39.22    5.61
   5  -2   5   37.10    5.72
   5  -2   5   47.24    2.97
   5   2   5   44.00    2.98
   5   2   6   97.59    5.23
   5   2   6   93.27    8.73
   5  -2   6   98.10    9.03
   5  -2   6   99.00    5.46
   5  -2   6  101.09    5.28
   5   2   6  103.56    5.81
   5  -2   7   44.09    3.35
   5  -2   7   41.78    3.86
   5  -2   7   38.15    6.26
   5   2   7   39.22    6.13
   5   2   7   42.81    3.68
   5  -2   7   50.04    3.99
   5  -2   7   39.89    3.08
   5  -2   7   45.06    3.24
   5   2   7   41.86    3.61
   5   2   8   42.25    3.78
   5  -2   8   45.85    3.35
   5  -2   8   46.48    4.13
   5   2   8   28.01    3.68
   5  -2   8   44.50    3.42
  -5  -2  -8   45.98    4.05
   5   2   8   44.14    3.61
   5   2   8   46.44    4.07
   5  -2   8   43.49    3.99
   5  -2   8   44.62    3.26
   5   2   8   39.58    6.44
   5  -2   8   29.64    5.83
   5   2   9  492.83   22.65
   5   2   9  530.52   23.16
   5  -2   9  531.38   23.06
   5  -2   9  497.88   22.33
   5   2   9  524.74   23.14
   5  -2   9  470.18   23.25
   5   2   9  431.21   23.02
   5   2   9  459.66   27.07
   5  -2   9  523.19   27.54
   5  -2   9  500.08   22.51
  -5  -2  -9  610.89   23.98
   5  -2  10   49.54    4.68
   5   2  10   42.09    4.13
   5   2  10   63.50    4.49
   5   2  10   43.07    6.93
   5  -2  10   45.53    7.12
   5   2  10   55.29    4.15
   5   2  10   65.66    4.72
   5  -2  10   54.73    4.62
   5  -2  10   57.93    3.79
   5  -2  10   54.12    3.89
   5  -2  11  135.46    6.63
   5   2  11  134.10    7.08
   5  -2  11  124.43    7.73
   5   2  11  118.01    7.24
   5  -2  11  131.20    6.77
   5   2  12   22.93    2.60
   5  -2  12   18.23    2.93
   5   2  12   16.80    2.44
   5  -2  12   20.79    2.17
   5   2  12   22.11    2.63
   5   2  13   71.69    3.95
   5   2  13   61.25    3.73
   5  -2  13   69.51    4.36
   5   2  13   68.99    3.98
  -5   3  14   46.54    3.06
   5   3 -14   38.20    3.21
   5  -3 -14   41.30    3.34
  -5   3  13    9.78    2.10
  -5  -3  13    9.09    2.24
   5   3 -13   12.43    2.56
   5  -3 -13   10.71    2.56
  -5   3  12  187.99    9.68
  -5  -3  12  191.72    9.69
  -5  -3  12  191.97    9.41
   5  -3 -12  173.22   10.23
   5   3 -12  176.37   10.17
  -5  -3  11   16.06    2.03
  -5  -3  11   15.50    2.64
   5  -3 -11   13.53    3.44
   5   3 -11   10.96    3.12
  -5   3  10  209.57   13.86
  -5   3  10  226.84   11.26
  -5  -3  10  226.01   10.55
  -5   3  10  230.67   16.85
  -5  -3  10  242.56   17.00
   5   3 -10  204.72   12.01
   5  -3 -10  196.41   11.99
  -5  -3  10  220.99   11.06
  -5   3   9   -0.88    4.29
  -5  -3   9    1.74    4.47
  -5  -3   9    0.54    2.11
  -5   3   9   -1.57    3.85
  -5  -3   9    0.99    3.70
   5   3  -9    0.88    2.97
   5  -3  -9    0.30    2.84
  -5   3   9    0.20    2.13
  -5   3   8   35.03    3.62
  -5   3   8   32.83    5.47
  -5  -3   8   31.64    5.15
  -5  -3   8   36.29    3.44
  -5   3   8   32.16    6.52
  -5  -3   8   28.43    6.65
   5  -3  -8   35.64    4.20
   5   3  -8   37.88    4.24
  -5   3   7   46.28    4.16
  -5  -3   7   61.85    6.32
  -5   3   7   59.56    8.43
  -5  -3   7   59.04    7.87
   5   3  -7   56.50    4.81
   5  -3  -7   54.10    4.98
  -5   3   6  194.62   14.48
  -5  -3   6  180.53   14.10
   5   3  -6  167.56   10.03
   5  -3  -6  162.25   10.05
   5   3  -6  203.49    9.30
  -5  -3   6  191.76   11.86
  -5   3   6  172.43   11.46
  -5   3   6  186.97    9.88
  -5  -3   6  193.57    9.84
  -5  -3   6  184.57    9.27
  -5   3   5  943.05   45.14
  -5  -3   5  947.93   45.39
  -5   3   5  914.23   39.73
  -5  -3   5  956.80   39.82
   5   3  -5  791.93   39.68
   5  -3  -5  809.25   39.81
  -5  -3   5  931.01   41.77
  -5   3   5  887.58   41.37
   5   3  -5  935.06   38.97
  -5  -3   5  920.97   39.18
   5   3  -4  452.54   19.36
  -5  -3   4  436.76   19.59
   5   3  -4  427.45   19.34
   5  -3  -4  425.32   19.37
  -5  -3   4  456.84   21.86
  -5   3   4  416.49   21.39
  -5   3   4  416.46   20.05
  -5  -3   4  443.44   20.16
  -5   3   4  439.60   24.74
  -5  -3   4  446.17   25.03
  -5  -3   3    4.79    3.93
  -5   3   3    2.04    3.49
   5   3  -3    6.27    1.49
  -5  -3   3    5.32    1.40
  -5   3   3    2.35    2.22
  -5  -3   3    5.46    2.74
   5  -3  -3    8.79    1.56
   5   3  -3    7.72    3.54
   5  -3  -3    2.96    3.53
   5   3  -2  177.92   11.84
   5  -3  -2  164.75   11.56
  -5   3   2  180.34    9.78
  -5   3   2  149.41   11.96
  -5  -3   2  191.80   12.96
   5   3  -2  175.29    8.40
   5   3  -1  443.52   21.01
   5  -3  -1  466.50   20.98
  -5  -3   1  497.39   21.20
  -5   3   1  547.47   22.69
   5   3  -1  470.89   24.44
   5  -3  -1  479.89   24.43
   5   3   0 1396.49   59.43
   5  -3   0 1368.16   59.30
   5  -3   0 1315.83   55.53
   5   3   0 1280.67   55.62
   5   3   0 1271.21   55.46
   5   3   1    5.54    1.34
   5  -3   1    2.36    1.22
   5   3   1    0.94    2.94
   5  -3   1    2.82    2.86
   5   3   2  372.03   16.73
   5   3   2  414.00   20.53
   5  -3   2  385.57   20.27
   5   3   2  362.86   16.57
   5   3   3  140.36    6.81
   5   3   3  132.33    6.70
   5  -3   3  131.20    6.67
   5   3   3  134.91    6.69
   5   3   4   88.62    4.88
   5  -3   4   84.37    4.75
   5   3   4   86.82    4.81
   5  -3   5  102.41    5.51
   5   3   5  102.71    5.87
   5   3   5  101.73    5.56
   5   3   5  115.81    9.06
   5  -3   5  106.69    8.66
   5   3   5  104.79    5.61
   5  -3   6   72.67    4.23
   5   3   6   71.92    4.10
   5   3   6   71.83    4.67
   5   3   6   54.71    6.81
   5   3   6   66.61    4.28
   5  -3   6   64.84    3.96
   5  -3   6   71.70    7.19
   5  -3   7   23.80    2.47
   5  -3   7   18.59    2.22
   5   3   7   20.58    2.79
   5   3   7   19.16    2.00
   5  -3   7   23.86    3.06
   5   3   7   22.95    4.91
   5  -3   7   19.01    4.90
   5   3   7   23.99    2.89
   5  -3   8  131.72    7.03
   5   3   8  140.70    7.76
   5   3   8  140.70   11.09
   5  -3   8  148.51   11.16
  -5  -3  -8  157.45    8.15
   5  -3   8  125.87    6.81
   5   3   8  140.90    7.64
   5  -3   8  148.51    7.66
   5  -3   8  132.96    7.84
   5   3   8  119.12    7.51
   5  -3   9    2.87    2.73
   5   3   9    1.71    2.34
   5   3   9   -1.93    4.28
   5  -3   9    2.59    4.47
   5   3   9    2.15    2.70
   5  -3   9    3.49    2.68
  -5  -3  -9    3.56    2.62
   5  -3   9    3.47    1.88
   5  -3   9    2.33    2.12
   5   3   9    4.50    2.60
   5  -3  10   25.34    3.59
   5   3  10   25.24    3.09
   5   3  10   22.69    5.60
   5  -3  10   23.65    5.73
   5   3  10   33.30    3.47
   5  -3  10   30.54    2.60
  -5  -3 -10   29.84    3.72
   5  -3  10   20.82    2.60
   5   3  10   31.32    3.50
   5   3  11  202.63    9.88
   5  -3  11  205.19    9.51
   5   3  11  182.74    9.83
   5  -3  11  200.06   10.48
   5   3  12   21.63    2.55
   5  -3  12   16.93    1.94
   5   3  12   22.32    2.57
   5  -3  12   18.72    3.05
   5   3  12   16.58    2.11
   5   3  13    1.74    1.60
   5   3  13    5.88    1.69
   5  -3  13    7.79    2.11
  -5   4  14   20.43    1.89
  -5   4  14   30.17    2.12
  -5  -4  14   32.01    2.16
   5  -4 -14   25.12    2.42
   5   4 -14   18.06    2.17
  -5   4  13    7.13    1.94
  -5  -4  13    7.60    1.92
   5  -4 -13    6.96    2.14
   5   4 -13    7.97    2.12
  -5   4  12    1.83    2.07
  -5  -4  12    1.67    2.16
  -5  -4  12   -0.10    1.32
  -5  -4  12    2.35    1.96
   5   4 -12    1.73    2.27
   5  -4 -12    0.91    2.38
  -5  -4  11    3.99    1.75
  -5  -4  11    6.04    2.22
   5   4 -11    4.76    2.88
   5  -4 -11    4.15    2.87
  -5   4  10    3.24    4.58
  -5  -4  10   -2.33    4.40
  -5  -4  10    5.70    2.47
  -5   4  10    0.54    4.14
  -5  -4  10    1.38    1.82
   5   4 -10    5.65    2.94
   5  -4 -10    1.39    2.85
  -5   4  10   -1.26    2.33
  -5   4   9   56.03    4.88
  -5  -4   9   61.69    4.72
  -5   4   9   61.23    7.91
   5   4  -9   65.13    5.36
   5  -4  -9   70.66    5.55
  -5  -4   8  185.11   11.48
   5   4  -8  152.37    9.33
   5  -4  -8  162.93    9.59
  -5   4   8  145.24    8.86
  -5   4   8  167.30   13.00
  -5  -4   8  200.72   13.94
  -5  -4   7  101.73    7.99
   5  -4  -7   97.36    6.43
   5   4  -7   86.04    6.12
  -5   4   7   75.17    5.71
  -5   4   7  105.25    9.88
  -5  -4   7   91.17    9.36
  -5  -4   6   74.31    4.88
  -5   4   6   81.40    5.19
  -5  -4   6   80.62    5.15
   5   4  -6   67.10    5.25
   5  -4  -6   69.18    5.42
   5   4  -6   85.70    4.82
  -5  -4   6   73.94    6.85
  -5   4   6   77.97    8.73
  -5  -4   6   81.33    8.69
   5  -4  -5   14.68    2.67
   5   4  -5   16.44    2.67
  -5   4   5   16.04    4.60
  -5  -4   5   26.96    5.43
  -5   4   5   21.85    2.68
  -5  -4   5   24.09    2.66
  -5  -4   5   20.96    2.44
  -5  -4   5   24.45    4.36
   5   4  -5   23.56    2.31
   5   4  -4    1.30    1.30
   5   4  -4    0.63    3.85
   5  -4  -4   -0.64    3.51
   5  -4  -4    0.19    2.02
  -5   4   4   -0.66    3.56
  -5  -4   4    3.31    3.55
   5   4  -4    1.38    1.28
  -5  -4   4    3.04    1.59
  -5   4   4    0.68    2.47
  -5  -4   4   -2.59    3.11
  -5   4   4    1.16    1.86
  -5  -4   4    0.17    1.67
   5  -4  -3  128.50    6.31
  -5   4   3  133.35   10.46
  -5  -4   3  109.16   10.04
   5   4  -3  131.83    6.58
  -5   4   3  135.70    8.29
   5   4  -3  122.34    9.87
   5  -4  -3  138.15   10.10
  -5  -4   3  132.89    7.11
  -5   4   3  124.09    6.98
  -5   4   2    2.02    2.04
   5   4  -2    3.12    1.41
  -5   4   2   -1.20    2.84
  -5  -4   2    1.21    3.07
   5   4  -2    3.85    3.21
   5  -4  -2    9.98    3.53
   5   4  -1  161.52   10.36
   5  -4  -1  132.02    9.75
   5   4  -1  138.44    7.46
   5  -4  -1  159.06    7.48
  -5  -4   1  165.47    7.77
   5   4   0   33.36    4.52
   5  -4   0   24.53    4.10
  -5  -4   0   31.31    2.46
   5   4   0   29.00    2.21
   5   4   0   30.56    2.54
   5  -4   0   30.13    2.34
   5   4   1  986.16   44.01
   5  -4   1  967.83   43.97
   5   4   1  923.32   40.41
   5  -4   1  956.86   40.47
  -5  -4  -1  926.71   40.71
   5  -4   2    2.57    1.20
   5   4   2    1.85    2.78
   5  -4   2   -0.47    2.96
   5   4   2    4.36    1.49
   5   4   2    4.57    1.53
   5   4   3   95.10    5.44
   5  -4   3  102.82    5.16
   5   4   3  101.55    5.31
   5  -4   3  109.37    5.42
   5   4   3   95.46    5.30
   5   4   4    1.62    1.63
   5  -4   4    1.22    1.09
   5  -4   4    1.31    1.55
   5   4   4    0.31    1.57
   5   4   4    1.06    1.51
   5   4   5  626.44   27.34
   5  -4   5  604.47   26.89
   5   4   5  640.54   27.84
   5   4   5  621.67   27.27
   5  -4   5  629.58   27.21
   5  -4   6  196.22    9.36
   5   4   6  198.04   10.07
   5   4   6  190.95    9.40
   5  -4   6  199.01    9.93
   5   4   6  182.79   12.70
   5  -4   6  198.63   12.97
   5   4   6  193.04    9.49
   5   4   7  288.09   13.15
   5  -4   7  285.37   12.89
   5   4   7  289.68   13.79
   5   4   7  269.43   12.76
   5   4   7  297.20   17.05
   5  -4   7  268.20   16.53
  -5  -4  -7  288.10   13.73
   5   4   7  246.99   13.29
   5  -4   8   71.39    4.23
   5   4   8   73.81    4.75
   5   4   8   61.91    7.69
   5  -4   8   53.11    7.30
  -5  -4  -8   72.34    5.02
   5   4   8   63.54    5.00
   5   4   8   53.31    4.45
   5  -4   9    4.73    2.02
   5   4   9    1.85    4.19
   5  -4   9    0.62    4.40
  -5  -4  -9    4.93    2.59
   5   4   9    4.02    2.80
   5   4   9    3.76    2.18
   5  -4   9    4.93    2.72
   5  -4  10    1.45    1.83
   5   4  10    3.70    4.44
   5  -4  10    3.76    4.32
   5   4  10    3.13    2.72
   5  -4  10   -1.59    2.92
   5   4  10    2.29    2.02
  -5  -4 -10    2.89    2.76
   5  -4  11  250.87   11.51
   5   4  11  275.75   12.72
   5  -4  11  264.33   12.57
   5   4  12   92.74    5.24
   5  -4  12   91.68    5.72
   5   4  13   53.60    3.42
   5   4  13   55.06    3.50
   5  -4  13   57.90    3.84
   5   5 -13   -0.14    1.85
   5  -5 -13    3.00    1.81
  -5   5  13    7.51    1.69
  -5  -5  13    4.23    1.52
  -5   5  12  180.96    8.30
  -5  -5  12  185.15    8.30
   5   5 -12  145.37    8.46
   5  -5 -12  139.14    8.53
  -5  -5  12  156.43    7.84
  -5  -5  12  148.98    8.32
  -5   5  11   14.67    2.57
  -5  -5  11   16.91    2.66
  -5  -5  11   13.31    2.20
   5   5 -11   15.22    2.97
   5  -5 -11   11.86    2.84
  -5  -5  11   17.19    2.73
   5   5 -10   56.14    4.79
   5  -5 -10   62.28    5.05
  -5  -5  10   51.76    4.56
  -5   5  10   56.65    4.72
  -5  -5  10   66.18    4.29
  -5   5  10   53.46    7.57
  -5  -5  10   63.28    7.91
  -5   5  10   65.42    7.00
  -5  -5  10   59.63    6.61
  -5  -5   9   38.86    4.04
   5   5  -9   47.45    4.35
   5  -5  -9   50.20    4.62
  -5   5   9   37.32    3.97
  -5   5   9   37.84    6.73
  -5  -5   9   43.13    7.10
  -5   5   8    3.88    2.46
  -5   5   8    7.84    4.34
  -5  -5   8    6.99    4.16
   5   5  -8    3.48    2.61
   5  -5  -8    5.71    2.74
  -5  -5   7   44.67    5.62
  -5   5   7   33.26    5.92
  -5  -5   7   33.28    5.88
  -5  -5   7   42.53    3.51
   5   5  -7   30.71    3.46
   5  -5  -7   28.40    3.60
  -5   5   7   26.39    3.42
  -5  -5   6  120.47    8.46
  -5   5   6  103.98    9.02
  -5  -5   6   98.06    8.80
   5   5  -6   76.41    5.63
   5  -5  -6   86.90    5.90
  -5  -5   6   90.54    5.60
  -5  -5   5   11.96    2.23
   5  -5  -5    8.22    2.17
   5   5  -5    8.86    2.19
  -5  -5   5   13.15    4.19
  -5   5   5    5.08    3.38
   5   5  -5    8.87    1.72
   5   5  -5    9.07    1.79
  -5   5   5   11.66    2.22
  -5  -5   5   13.96    2.16
  -5  -5   5   10.51    3.66
  -5   5   4  116.03    9.03
  -5  -5   4   92.56    8.37
   5   5  -4   78.44    5.26
   5  -5  -4   78.12    5.36
   5   5  -4   91.70    5.03
   5   5  -4   94.56    5.01
  -5   5   4   93.51    5.41
  -5  -5   4   99.20    5.42
  -5  -5   4   91.43    5.47
   5   5  -4  101.97    8.65
   5  -5  -4   97.38    8.50
  -5   5   4   85.46    6.63
   5  -5  -3  277.70   14.20
   5  -5  -3  305.17   13.43
   5   5  -3  276.33   16.74
   5  -5  -3  290.36   16.85
  -5   5   3  317.71   15.43
  -5   5   3  276.00   17.23
  -5  -5   3  308.61   17.67
  -5   5   3  282.25   13.81
  -5  -5   3  302.23   13.89
   5   5  -3  293.07   13.56
   5  -5  -2  203.71    9.72
  -5  -5   2  206.26   13.36
  -5   5   2  174.88   12.83
   5  -5  -2  201.13    9.52
  -5  -5   2  217.77   10.23
   5   5  -2  193.75   12.44
   5  -5  -2  203.69   12.53
   5   5  -2  211.11    9.82
   5  -5  -1   96.93    5.18
  -5   5   1   98.54    8.35
  -5  -5   1   86.12    7.98
   5   5  -1   88.48    7.30
   5  -5  -1   99.03    7.55
   5   5  -1   97.70    5.31
  -5  -5   1   99.08    5.57
   5  -5  -1   99.34    5.07
   5  -5   0  109.62    5.46
   5   5   0  104.73    5.29
   5   5   0  106.13    7.89
   5  -5   0  103.96    7.83
   5   5   0  105.22    5.60
  -5  -5   0  101.22    5.79
   5  -5   0  101.68    5.34
   5   5   1  196.62    9.25
  -5  -5  -1  190.16    9.74
   5  -5   1  204.37    9.34
   5   5   1  215.92   12.31
   5  -5   1  200.96   12.07
   5  -5   2  402.52   21.28
   5   5   2  408.77   21.31
   5   5   2  401.14   18.11
   5   5   2  416.19   18.45
   5  -5   2  411.86   18.06
   5   5   3  485.58   21.53
   5   5   3  470.46   21.73
   5   5   3  492.73   21.31
   5  -5   3  476.81   21.07
   5   5   4   57.11    3.79
   5  -5   4   59.57    3.71
   5   5   4   54.94    4.05
   5   5   4   56.36    3.75
   5  -5   4   57.29    3.25
   5   5   5   87.01    4.97
   5   5   5   83.17    5.46
   5   5   5   84.33    4.94
   5  -5   5   86.59    4.86
   5  -5   6  496.34   22.72
   5   5   6  501.65   23.12
   5   5   6  484.25   22.32
   5  -5   6  515.86   22.22
   5   5   6  504.57   22.36
   5   5   7  132.36    6.90
   5  -5   7  120.47    7.15
   5   5   7  122.11    6.93
   5   5   7  123.71    7.47
   5   5   7  123.61    6.54
   5   5   7  125.48   10.01
   5  -5   7  118.45    9.89
  -5  -5  -7  128.61    7.29
   5  -5   7  128.26    6.60
   5   5   8   78.74    5.07
  -5  -5  -8   82.97    5.83
   5   5   8   92.36    8.49
   5  -5   8   74.50    7.99
   5   5   8   77.72    5.79
   5   5   8   83.74    5.26
   5  -5   8   82.23    4.82
   5   5   9    4.55    2.05
  -5  -5  -9    4.57    2.82
   5   5   9    3.16    2.83
   5   5   9    1.75    3.90
   5  -5   9    2.36    4.19
   5  -5   9    5.43    2.00
   5   5   9    3.36    2.52
   5  -5  10   75.69    5.76
  -5  -5 -10   91.95    6.11
   5  -5  10   67.64    8.03
   5   5  10   93.11    5.50
   5  -5  10   85.71    4.84
   5   5  10   89.48    6.15
   5   5  11   11.32    2.81
   5  -5  11    9.70    2.86
   5  -5  12   93.59    5.68
   5  -5  13   12.70    2.15
  -5   6  13   10.08    1.56
  -5  -6  13   13.59    1.57
  -5  -6  12   14.22    2.32
  -5   6  12   16.77    2.10
  -5  -6  12   15.45    2.06
  -5  -6  12   13.39    1.91
   5   6 -12   14.03    2.22
   5  -6 -12   14.12    2.36
  -5  -6  11    5.86    2.31
  -5   6  11    4.12    2.00
  -5  -6  11    6.94    1.90
   5  -6 -11    4.65    2.33
   5   6 -11    5.61    2.35
  -5  -6  11    4.70    1.92
  -5  -6  10   -1.26    2.27
  -5   6  10    2.18    2.39
   5  -6 -10   -1.13    2.39
   5   6 -10    1.09    2.34
  -5   6  10    1.27    4.08
  -5  -6  10   -3.03    4.22
  -5  -6   9  159.00    9.25
  -5   6   9  175.72   12.98
  -5  -6   9  188.29   12.74
  -5  -6   9  190.35   11.99
   5   6  -9  162.69    9.29
   5  -6  -9  163.42    9.40
   5   6  -8  147.97    8.55
   5  -6  -8  151.47    8.76
  -5   6   8  147.10   11.49
  -5  -6   8  173.56   12.20
  -5  -6   7   49.34    4.10
  -5   6   7   39.00    6.11
  -5  -6   7   38.82    6.08
   5   6  -7   41.03    3.84
   5  -6  -7   34.02    3.73
   5  -6  -6   65.71    4.95
   5   6  -6   68.39    4.76
  -5  -6   6   71.36    4.98
  -5  -6   6   78.72    7.12
  -5  -6   6   71.11    7.33
  -5   6   6   61.93    7.24
   5  -6  -5   34.77    3.44
   5   6  -5   30.16    3.18
  -5   6   5   43.11    5.97
  -5  -6   5   41.76    5.70
   5   6  -5   45.25    3.02
  -5  -6   5   35.40    3.40
   5   6  -5   39.64    5.93
   5  -6  -5   36.86    5.84
  -5   6   5   42.03    3.29
  -5  -6   5   42.63    3.20
   5   6  -4    3.11    1.47
   5   6  -4    5.02    1.72
   5  -6  -4    2.82    1.64
  -5   6   4    5.01    1.68
  -5  -6   4    3.14    1.61
   5   6  -4   10.81    3.60
   5  -6  -4    3.24    3.02
   5  -6  -4    2.97    1.91
  -5  -6   4    3.93    1.93
   5   6  -4    2.00    1.46
  -5  -6   4    3.84    2.94
  -5   6   4    2.23    2.82
   5  -6  -3  494.64   23.18
   5   6  -3  508.41   22.37
  -5   6   3  480.17   25.91
  -5  -6   3  494.92   25.96
  -5   6   3  489.97   22.46
  -5  -6   3  500.72   22.44
   5   6  -3  472.88   25.27
   5  -6  -3  480.07   25.21
   5  -6  -3  532.77   22.32
   5   6  -2    3.19    1.64
  -5  -6   2    5.53    1.92
   5  -6  -2    2.78    1.26
  -5   6   2    2.62    2.70
  -5  -6   2    2.08    2.99
   5   6  -2    1.66    2.30
   5  -6  -2    3.27    2.65
   5  -6  -2    4.42    1.92
   5  -6  -1   45.34    3.97
  -5   6   1   43.52    5.78
  -5  -6   1   58.25    6.13
   5   6  -1   59.71    5.45
   5  -6  -1   50.76    5.10
  -5  -6   1   49.12    3.82
   5  -6  -1   57.20    3.41
   5  -6  -1   56.83    3.46
   5   6  -1   58.63    3.68
   5   6   0    5.01    2.48
   5  -6   0    4.58    2.74
   5  -6   0    6.20    1.49
   5  -6   0    6.88    1.49
  -5  -6   0    5.51    1.69
   5   6   0    5.98    1.71
   5  -6   1  611.21   28.15
   5   6   1  592.59   27.36
   5  -6   1  618.45   27.03
   5   6   1  622.65   26.96
   5   6   1  675.95   27.67
   5   6   1  623.54   29.92
   5  -6   1  591.01   29.72
   5   6   2  238.63   10.98
   5   6   2  248.06   11.59
   5  -6   2  238.28   10.93
   5  -6   2  227.75   11.97
   5  -6   3  297.34   13.53
   5   6   3  304.54   14.13
   5   6   3  301.20   14.36
   5   6   3  308.75   13.82
   5   6   4   83.97    4.96
   5   6   4   80.06    4.71
   5   6   4   80.18    5.30
   5  -6   5   24.97    2.79
   5   6   5   27.64    2.80
   5  -6   5   25.45    2.54
   5   6   5   31.48    2.86
   5   6   5   22.03    3.11
   5  -6   6   29.51    3.06
   5   6   6   29.36    2.99
   5   6   6   28.93    2.88
   5  -6   6   27.66    2.57
   5  -6   7   81.96    4.92
   5  -6   7   89.27    5.62
   5   6   7   85.90    5.22
  -5  -6  -7   92.59    5.77
   5   6   7   83.40    5.05
   5  -6   8    7.87    2.65
   5   6   8    2.48    1.59
   5  -6   8    9.17    2.00
   5   6   8    7.70    2.39
  -5  -6  -8    6.75    2.64
  -5  -6  -9  605.27   26.78
   5  -6   9  574.53   25.49
   5  -6   9  565.28   26.26
   5   6   9  587.06   25.90
   5   6  10  234.68   11.39
  -5  -6 -10  238.34   12.27
   5   6  11  143.82    7.49
   5  -6  12    1.45    1.96
   5   6  12    1.32    1.93
   5  -6  13   11.05    1.87
  -5  -7  13    0.08    1.01
   5   7 -13    0.72    1.08
  -5   7  12   47.08    2.89
  -5  -7  12   39.18    3.36
  -5  -7  12   44.97    3.12
   5   7 -12   36.88    3.04
  -5   7  11   44.72    3.04
  -5  -7  11   47.27    3.08
  -5  -7  11   23.59    3.11
  -5  -7  11   32.26    3.04
   5  -7 -11   35.41    3.30
   5   7 -11   29.31    3.13
   5   7 -10   76.28    5.24
   5  -7 -10   75.96    5.33
  -5  -7  10   63.20    5.37
  -5   7  10   95.51    5.05
  -5  -7  10   94.03    5.00
  -5   7   9   56.48    6.83
  -5  -7   9   54.01    6.44
  -5  -7   9   42.42    4.41
   5   7  -9   57.01    4.26
   5  -7  -9   53.98    4.28
  -5  -7   8   33.06    5.36
   5   7  -8   36.15    3.38
   5  -7  -8   25.98    3.22
  -5   7   7   12.82    2.94
  -5   7   7   16.65    4.39
  -5  -7   7    8.97    3.70
   5   7  -7   10.53    2.43
   5  -7  -7   14.45    2.57
  -5  -7   7   12.55    2.77
  -5   7   6    2.78    3.08
  -5  -7   6    9.24    3.66
   5   7  -6    8.90    3.83
   5  -7  -6    6.43    3.83
   5   7  -6    5.05    2.16
   5  -7  -6    5.81    2.24
  -5  -7   6    6.95    2.59
  -5  -7   5   86.80    5.88
   5   7  -5  104.37    5.15
  -5   7   5  105.07    8.60
  -5  -7   5   94.42    8.00
   5  -7  -5   97.59    6.03
   5   7  -5   88.87    8.23
   5  -7  -5   78.13    7.94
   5  -7  -5   80.71    5.32
   5   7  -5   79.34    5.20
   5   7  -4  148.24   10.47
   5  -7  -4  147.01   10.41
  -5   7   4  158.80   10.71
  -5  -7   4  159.41   10.65
   5   7  -4  164.06    7.62
   5  -7  -4  154.17    8.58
   5  -7  -4  136.28    7.62
  -5   7   4  157.57    7.65
  -5  -7   4  154.62    7.63
  -5  -7   4  118.52    7.95
   5   7  -4  156.46    7.69
   5  -7  -3   72.68    5.12
   5  -7  -3   66.65    4.09
   5  -7  -3   72.88    4.32
   5   7  -3   65.67    6.23
   5  -7  -3   74.76    6.38
  -5   7   3   66.74    4.19
  -5  -7   3   69.27    4.20
  -5   7   3   71.82    6.79
  -5  -7   3   64.88    6.47
  -5  -7   3   70.89    4.99
   5   7  -3   70.85    4.37
   5   7  -2  593.95   25.14
   5   7  -2  549.54   27.32
   5  -7  -2  511.78   27.03
  -5   7   2  561.88   24.97
  -5  -7   2  563.24   24.94
  -5  -7   2  544.35   25.62
  -5   7   2  525.50   28.10
  -5  -7   2  551.47   28.20
   5  -7  -2  605.75   24.99
   5  -7  -2  542.05   25.90
  -5  -7   1  759.61   34.16
  -5   7   1  737.94   36.85
  -5  -7   1  751.60   36.88
   5   7  -1  772.38   33.72
   5   7  -1  750.63   35.84
   5  -7  -1  731.86   35.72
   5  -7  -1  791.73   33.60
   5  -7  -1  796.63   34.68
  -5   7   0  106.01    8.27
  -5  -7   0   99.81    8.11
   5   7   0  102.85    7.30
   5  -7   0  104.18    7.29
   5  -7   0   96.03    5.55
  -5  -7   0  103.54    6.04
   5   7   0  100.92    5.75
   5  -7   1   91.96    6.93
   5   7   1   91.55    6.93
   5  -7   1   85.35    5.77
   5  -7   1   86.93    4.73
   5   7   1   90.89    5.28
   5  -7   2  944.52   43.38
   5  -7   2  970.91   42.07
   5   7   2 1006.49   42.13
   5  -7   3    3.08    1.91
   5   7   3    3.90    1.55
   5   7   3    1.17    1.60
   5  -7   3    1.99    1.10
   5   7   3    2.19    1.83
   5  -7   4   43.12    3.36
   5   7   4   42.84    3.16
   5   7   4   40.20    3.49
   5  -7   5    7.03    2.15
   5   7   5    6.40    1.97
   5   7   5    6.48    2.12
   5  -7   6   31.13    3.27
   5   7   6   31.66    2.94
  -5  -7  -6   27.34    3.23
   5   7   6   28.25    3.05
   5  -7   7    7.14    2.59
  -5  -7  -7   10.74    2.63
   5   7   7    6.21    2.51
   5   7   7    8.60    2.16
   5  -7   8  162.14    8.71
   5   7   8  164.07    8.37
  -5  -7  -8  157.09    8.93
   5   7   8  160.66    8.14
  -5  -7  -9   26.78    3.55
   5   7   9   27.79    3.15
   5  -7   9   22.18    3.22
  -5  -7 -10   30.36    3.60
   5  -7  10   34.11    3.57
   5   7  10   35.45    3.32
   5   7  11   69.59    4.41
   5   7  12    7.09    1.90
   5   7  12    8.03    1.95
   5   7  13    1.70    1.28
   5   7  13    0.82    1.23
   5  -8 -13   27.52    2.25
  -5  -8  12    0.11    1.38
  -5  -8  12   -0.70    1.71
  -5  -8  11   11.40    2.47
   5   8 -11   11.23    1.94
  -5  -8  11    9.40    2.05
  -5   8  11   15.88    1.80
  -5  -8  10    3.47    2.36
  -5   8  10    3.95    1.70
  -5  -8  10    1.72    1.64
  -5   8  10    0.39    2.56
   5   8 -10    4.93    2.04
   5  -8 -10   -0.63    2.04
  -5  -8   9   51.48    4.55
   5  -8  -9   49.03    4.11
   5   8  -9   50.98    4.00
   5  -8  -8   -1.89    3.53
   5   8  -8   -3.41    2.23
   5  -8  -8   -2.00    2.35
  -5   8   8    3.16    2.67
  -5  -8   7  258.67   14.33
  -5  -8   7  299.67   16.86
   5  -8  -7  293.52   17.72
   5  -8  -7  272.01   13.83
  -5   8   6   29.15    4.81
  -5  -8   6   24.94    4.43
   5   8  -6   30.83    5.14
   5  -8  -6   29.33    5.20
  -5   8   6   36.47    3.66
   5  -8  -6   25.54    2.93
  -5  -8   6   24.78    3.38
   5  -8  -5  555.29   26.13
  -5  -8   5  512.84   26.76
  -5   8   5  621.65   29.58
  -5  -8   5  600.95   29.34
   5  -8  -5  646.77   27.38
   5   8  -5  600.30   29.46
   5  -8  -5  617.36   29.66
   5   8  -5  618.45   26.07
   5  -8  -4   38.34    2.99
  -5   8   4   48.17    3.12
  -5  -8   4   47.31    3.09
   5   8  -4   49.83    5.37
   5  -8  -4   41.08    5.04
   5  -8  -4   49.53    4.19
   5   8  -4   46.43    3.30
  -5   8   4   40.96    5.31
  -5  -8   4   41.30    5.21
  -5   8   3   16.81    3.74
  -5  -8   3   18.63    3.96
   5   8  -3   21.04    3.72
   5  -8  -3   21.70    3.72
   5  -8  -3   18.83    2.98
   5   8  -3   21.61    2.47
  -5  -8   3   24.67    3.12
  -5   8   3   26.12    2.32
  -5  -8   3   24.45    2.25
   5  -8  -3   22.07    2.52
  -5   8   2  553.83   25.12
  -5  -8   2  572.24   25.11
  -5  -8   2  551.17   26.07
  -5   8   2  546.70   28.15
  -5  -8   2  569.14   28.22
   5  -8  -2  614.48   25.39
   5   8  -2  556.28   27.36
   5  -8  -2  538.17   27.23
   5  -8  -2  558.52   26.40
   5   8  -2  597.16   25.53
  -5  -8   1   88.49    6.06
   5  -8  -1  108.87    6.65
   5  -8  -1   91.99    7.00
   5   8  -1  100.13    7.19
   5   8  -1  104.58    5.78
   5  -8  -1  104.83    5.69
  -5   8   1   92.82    7.74
  -5  -8   1  107.79    8.10
   5  -8   0   -0.35    2.09
   5   8   0    2.83    2.27
  -5  -8   0   -0.78    1.89
   5  -8   0   -1.28    1.78
   5   8   0   -1.18    1.80
  -5   8   0    0.96    2.85
  -5  -8   0   -1.39    2.62
   5   8   1  190.64    9.68
   5   8   1  196.36    9.70
   5  -8   1  190.99   10.50
   5  -8   2  151.92    9.14
   5   8   2  162.80    7.78
   5   8   2  173.50    8.59
   5   8   3    6.83    2.24
   5   8   3    4.59    2.18
   5  -8   3    6.16    2.22
   5  -8   3    5.85    1.82
   5   8   3    5.40    1.59
   5   8   4    5.07    2.18
   5   8   4   14.00    2.66
   5   8   4    8.33    1.91
   5  -8   4   11.67    2.15
  -5  -8  -4   10.46    2.28
   5   8   5   85.39    5.78
   5   8   5   85.77    5.35
   5   8   5   78.04    4.88
  -5  -8  -5   81.98    5.54
   5  -8   5   87.24    5.14
   5   8   6    0.22    2.52
   5   8   6   -0.66    2.17
   5  -8   6    0.96    2.05
  -5  -8  -6    1.61    2.38
   5   8   6    3.64    2.16
   5   8   7   63.67    5.59
   5   8   7   82.19    4.95
   5   8   7   76.40    4.74
  -5  -8  -7   75.14    5.44
   5  -8   7   78.26    5.03
   5   8   8   54.94    5.01
   5   8   8   58.19    3.98
   5   8   8   58.80    4.15
  -5  -8  -8   56.39    4.70
   5  -8   8   61.43    4.59
   5   8   9   98.65    5.71
  -5  -8  -9   96.01    6.26
   5   8   9   91.44    6.56
   5  -8   9  100.97    6.07
   5   8  10    4.88    2.72
   5   8  10    2.89    2.18
  -5  -8 -10    0.19    2.47
   5  -8  10    2.51    2.29
   5   8  11   21.61    2.38
   5  -8  11   22.42    2.66
   5   8  11   21.34    3.10
   5  -8  12    4.93    1.73
   5   8  12    2.10    1.55
   5   8  12    2.27    1.50
  -5  -9  12   79.27    4.45
  -5  -9  11   -0.84    1.53
  -5   9  10   23.29    3.09
  -5   9   9   13.04    2.92
   5  -9  -8   50.28    3.88
  -5   9   8   73.60    4.97
  -5  -9   7  180.79   11.43
   5  -9  -7  216.44   10.76
  -5   9   6   13.21    2.74
  -5  -9   6   10.51    2.80
   5  -9  -6   16.91    2.88
   5   9  -5    2.56    1.68
  -5  -9   5    5.75    2.58
   5  -9  -5    4.41    2.52
  -5  -9   4   21.23    3.03
   5  -9  -4   23.53    2.68
   5  -9  -4   14.75    3.30
   5  -9  -4   18.40    3.15
   5   9  -4   20.61    2.51
   5   9  -3   22.62    2.64
  -5  -9   3   20.73    3.25
   5  -9  -3   20.97    2.45
   5  -9  -3   21.82    3.53
   5  -9  -3   20.75    3.26
  -5  -9   3   18.70    3.68
   5   9  -2    7.14    1.97
  -5  -9   2    4.37    2.20
   5  -9  -2    7.07    2.03
   5  -9  -2    8.35    2.66
   5  -9  -2    2.36    2.32
  -5  -9   2    6.53    2.80
   5   9  -1    3.43    2.19
   5  -9  -1    0.88    1.82
  -5  -9   1    4.37    2.32
  -5  -9   1    0.41    2.17
   5  -9  -1    3.13    2.33
   5  -9  -1    5.94    2.10
  -5  -9   0  295.61   16.47
  -5  -9   0  282.33   14.69
   5  -9   0  302.52   15.77
   5   9   0  298.89   14.22
   5   9   0  314.56   14.41
   5  -9   0  310.35   14.30
  -5  -9  -1   43.27    5.28
   5   9   1   57.21    3.92
   5   9   1   50.33    3.96
  -5  -9  -1   55.99    4.24
   5  -9   1   48.87    4.54
   5   9   2   22.91    2.73
   5  -9   2   16.02    3.01
   5   9   2   22.63    2.93
   5  -9   3   46.65    4.55
   5   9   3   55.77    4.36
   5  -9   3   58.89    3.76
   5   9   3   59.45    3.47
   5  -9   4   61.67    3.95
   5   9   4   60.38    4.38
   5  -9   4   52.29    4.56
  -5  -9  -4   51.60    4.25
   5   9   4   53.71    4.44
   5   9   4   51.25    3.60
   5   9   5  235.45   11.86
   5   9   5  234.86   11.17
  -5  -9  -5  229.91   11.89
   5   9   5  225.62   12.08
   5  -9   5  257.91   11.62
   5   9   6  239.88   11.94
   5  -9   6  251.05   11.82
  -5  -9  -6  231.04   12.21
   5   9   6  235.85   12.44
   5   9   6  243.59   11.43
   5   9   7   35.01    3.46
   5  -9   7   39.07    3.65
  -5  -9  -7   33.68    3.93
   5   9   7   36.81    4.31
   5   9   7   40.61    3.31
   5   9   8   23.48    2.73
  -5  -9  -8   19.82    3.23
   5   9   8   21.69    2.73
   5  -9   8   21.59    3.08
   5   9   8   20.97    3.66
  -5  -9  -9    4.93    2.60
   5   9   9    1.81    2.03
   5  -9   9    1.19    2.25
   5   9   9    6.87    3.04
  -5  -9 -10   17.08    2.85
   5   9  10   16.56    2.37
   5   9  10   12.89    2.93
   5  -9  10   18.67    2.61
   5   9  11   15.95    2.09
   5  -9  11   17.58    2.27
   5   9  11   12.24    2.69
   5  -9  12   20.48    2.00
   5   9  12   19.63    1.92
   5   9  12   20.76    1.89
  -5  -9 -12   18.08    2.27
   5 -10 -12   14.51    1.82
  -5 -10  12   10.62    1.57
  -5 -10  12   14.48    1.87
  -5 -10  11   29.91    2.66
  -5  10  10    0.15    2.05
  -5  10   9  265.10   12.92
  -5  10   8    3.04    2.48
  -5 -10   7  150.14    9.25
  -5  10   7  174.62    9.01
   5 -10  -6   40.14    3.96
  -5 -10   6   31.48    3.91
  -5  10   6   35.48    3.70
   5 -10  -5  370.07   16.19
   5 -10  -5  351.47   17.22
   5 -10  -4  228.58   11.26
   5  10  -4  228.07   11.11
  -5 -10   4  232.54   11.99
   5 -10  -4  229.75   12.41
   5  10  -3  149.13    7.73
   5 -10  -3  145.12    7.64
   5 -10  -3  148.66    8.88
  -5 -10   3  129.37    8.49
  -5 -10   2   22.61    3.40
   5 -10  -2   26.00    2.68
   5 -10  -2   23.13    3.60
   5  10  -2   24.59    2.91
  -5 -10   1   23.84    3.48
   5 -10  -1   23.92    2.69
   5 -10  -1   22.82    3.56
   5  10  -1   20.20    2.82
  -5 -10   0    3.39    2.51
   5 -10   0    0.66    1.94
   5  10   0    1.32    1.91
   5  10   0    3.22    2.22
   5  10   1  242.48   11.57
   5 -10   1  216.38   12.47
  -5 -10  -1  239.68   12.15
   5  10   1  239.40   11.76
   5  10   2  370.05   17.09
   5 -10   2  357.22   18.09
   5  10   2  367.61   17.27
  -5 -10  -3   28.01    3.20
   5  10   3   27.02    3.23
   5 -10   3   20.86    3.47
   5  10   4   24.53    2.35
   5 -10   4   30.18    2.81
   5  10   4   33.46    3.43
  -5 -10  -4   29.64    3.49
   5  10   4   29.44    3.23
   5 -10   4   23.41    3.32
  -5 -10  -4   25.52    3.17
   5  10   5   55.04    4.69
   5  10   5   61.73    3.98
  -5 -10  -5   63.80    4.82
   5 -10   5   72.56    4.42
   5  10   5   69.28    4.96
   5 -10   6   13.69    2.50
   5  10   6   12.65    2.77
  -5 -10  -6   17.16    3.12
  -5 -10  -6   10.22    2.50
   5  10   6   16.57    3.31
   5  10   6   13.44    2.34
   5  10   7  134.48    7.34
   5 -10   7  130.97    7.23
  -5 -10  -7  132.46    7.79
   5  10   7  131.02    7.93
   5  10   7  133.28    6.88
   5  10   8   71.47    4.80
  -5 -10  -8   76.91    5.43
   5  10   8   80.61    4.73
   5 -10   8   83.41    5.10
   5  10   8   80.72    5.68
  -5 -10  -9   81.17    5.69
   5  10   9   91.07    6.05
   5 -10   9   92.14    5.36
   5  10   9   93.24    5.11
   5  10  10   20.71    3.03
   5 -10  10   20.88    2.39
   5  10  10   18.14    2.18
   5  10  11   57.65    3.45
   5 -10  11   65.45    3.65
   5  10  11   62.02    3.57
   5  10  11   52.86    3.96
   5 -11 -11   10.65    1.96
  -5 -11  11   10.14    1.79
  -5 -11  11   11.98    1.88
   5 -11 -11   10.51    1.52
   5 -11 -10   25.21    2.39
  -5 -11  10   25.81    2.77
  -5 -11   9    6.59    2.38
  -5  11   9    4.15    2.13
  -5  11   8   20.05    2.79
  -5 -11   7   24.87    3.74
  -5  11   7   27.24    3.19
  -5 -11   6    8.01    2.87
   5 -11  -6    5.80    2.77
   5 -11  -6    5.88    2.11
  -5  11   6    3.20    2.39
  -5 -11   5   49.31    4.71
  -5  11   5   52.56    4.19
   5 -11  -5   55.45    4.97
   5 -11  -5   52.63    4.05
   5  11  -4  363.43   17.71
   5 -11  -4  408.26   18.05
  -5 -11   4  402.92   18.83
   5 -11  -4  394.55   19.30
  -5 -11   3   24.28    3.93
   5 -11  -3   33.01    3.21
   5 -11  -3   26.39    3.90
   5  11  -3   33.57    3.16
   5  11  -2    8.97    2.37
  -5 -11   2   11.82    3.07
   5 -11  -2    9.79    2.19
   5 -11  -2    9.40    3.04
   5 -11  -2    9.41    1.92
   5  11  -1    0.86    2.18
  -5 -11   1    3.69    2.64
   5 -11  -1    1.66    2.14
   5 -11  -1   -0.29    2.78
   5  11  -1    2.37    2.04
   5  11   0  113.99    6.37
   5 -11   0  109.86    6.61
  -5 -11   0  113.67    7.18
   5  11   0  113.63    6.72
   5  11   1   11.26    2.71
   5 -11   1   13.50    3.04
  -5 -11  -1   11.36    2.93
   5  11   1   15.98    2.52
  -5 -11  -1   12.66    2.43
   5  11   2  153.75    8.52
  -5 -11  -2  174.27    8.85
   5 -11   2  163.59    9.76
   5  11   2  166.71    8.96
   5  11   3   -1.51    2.33
  -5 -11  -3    1.17    2.27
   5 -11   3    0.85    2.69
   5  11   4  186.75    9.46
  -5 -11  -4  186.03    9.70
   5 -11   4  170.42    9.97
   5  11   4  161.96    9.36
   5  11   5   23.03    3.23
   5 -11   5   19.91    2.53
  -5 -11  -5   25.80    3.23
   5  11   5   24.26    3.24
  -5 -11  -5   22.22    3.53
  -5 -11  -6   86.49    5.77
   5  11   6   91.19    5.86
   5 -11   6   93.26    5.32
   5  11   6   89.50    6.05
   5  11   7    1.55    2.67
   5 -11   7    2.01    1.96
  -5 -11  -7    0.21    2.60
   5  11   7    1.34    2.24
   5  11   7    3.47    1.94
   5  11   8   90.32    5.75
   5 -11   8   90.84    5.17
  -5 -11  -8   84.18    5.77
   5  11   8   78.32    5.13
   5  11   8   88.68    4.89
   5  11   9   18.29    2.89
   5 -11   9   18.79    2.31
  -5 -11  -9   13.97    2.77
   5  11   9   14.94    2.07
   5 -11  10   59.55    3.63
   5  11  10   59.40    4.20
   5  11  10   57.55    3.47
   5  11  11    2.25    1.19
   5 -12 -11   13.28    1.84
  -5 -12  11   11.80    1.73
  -5 -12  11   12.65    1.60
  -5 -12  10    9.50    1.97
  -5 -12  10    9.79    1.88
   5 -12 -10    7.41    1.57
  -5  12   9   32.94    2.85
   5 -12  -9   32.11    2.73
  -5 -12   9   34.67    3.10
   5 -12  -9   29.77    3.04
  -5  12   8    3.68    2.17
  -5 -12   8    3.12    2.23
   5 -12  -8    3.08    2.00
   5 -12  -8    2.84    2.18
  -5  12   7  168.78    8.59
  -5 -12   7  156.46    9.24
   5 -12  -7  168.04    8.58
  -5  12   6   97.08    5.79
   5 -12  -6   90.13    6.46
  -5 -12   6   91.75    6.42
   5 -12  -6   98.25    5.75
  -5  12   5  192.60    9.77
   5 -12  -5  179.40   10.66
   5 -12  -5  194.88    9.79
  -5 -12   5  195.53   10.55
  -5 -12   4    1.87    2.75
   5 -12  -4    2.39    2.14
   5 -12  -4   -1.18    2.87
   5 -12  -4    0.49    1.99
   5  12  -4    1.11    1.72
   5 -12  -3   31.31    3.32
  -5 -12   3   35.63    4.26
   5 -12  -3   31.48    4.26
   5  12  -3   34.38    3.27
   5 -12  -3   37.43    3.12
   5 -12  -2   21.53    3.02
  -5 -12   2   26.07    3.91
   5 -12  -2   22.68    3.83
   5  12  -2   26.34    3.04
   5 -12  -2   19.05    2.36
   5  12  -1   61.31    4.47
   5  12  -1   49.22    4.00
   5 -12  -1   57.99    4.41
  -5 -12   1   60.23    3.91
   5 -12  -1   64.54    5.59
  -5 -12   1   66.20    5.36
   5  12   0    6.66    2.25
  -5 -12   0    5.07    1.97
   5  12   0    5.98    2.38
  -5 -12   0    7.33    2.97
   5  12   1  165.40    8.78
   5  12   1  171.11    9.19
  -5 -12  -1  174.59    8.98
   5 -12   1  165.81   10.12
  -5 -12  -1  182.32    9.76
   5  12   2  200.83   10.48
   5  12   2  220.35   10.93
  -5 -12  -2  216.98   10.81
   5 -12   2  203.56   11.72
  -5 -12  -2  212.58   11.26
   5 -12   3   40.22    4.42
  -5 -12  -3   46.54    3.94
   5  12   3   38.13    3.52
   5 -12   4    3.75    2.81
   5  12   4    2.05    2.36
  -5 -12  -4    6.71    2.84
   5  12   5    5.99    2.81
   5  12   5   11.51    2.71
  -5 -12  -5    5.22    2.86
   5  12   6   32.62    3.61
   5  12   6   29.19    3.35
   5  12   7  186.72    9.46
   5  12   7  184.77    9.31
   5  12   7  173.58    8.47
   5  12   8   20.24    2.79
   5  12   8   17.08    2.35
   5  12   8   17.01    1.95
  -5 -12  -8   15.31    2.90
   5  12   9    3.46    2.19
   5  12   9    3.39    1.39
   5  12  10  114.52    5.94
   5  12  10  108.91    5.35
  -5 -13  10   42.26    2.82
   5 -13 -10   35.26    2.53
  -5 -13  10   38.08    2.65
   5 -13 -10   38.12    2.88
   5 -13  -9    4.54    1.88
  -5 -13   9    2.09    1.64
   5 -13  -9    3.47    1.59
  -5  13   8    7.03    1.99
   5 -13  -8    9.69    2.32
  -5 -13   8    6.90    2.00
   5 -13  -8    7.98    1.89
  -5  13   7   12.82    2.30
   5 -13  -7   10.13    2.42
   5 -13  -7   10.29    2.28
  -5  13   6   47.01    3.77
   5 -13  -6   44.74    4.45
   5 -13  -6   49.53    3.91
   5 -13  -6   56.08    3.86
  -5  13   5   33.99    3.25
   5 -13  -5   31.85    4.03
   5 -13  -5   32.93    3.32
   5 -13  -5   39.64    3.50
  -5  13   4    3.75    2.17
   5 -13  -4    3.67    2.00
   5 -13  -4    4.34    2.92
   5  13  -4    2.04    1.66
   5 -13  -4    1.44    2.19
   5  13  -3   11.94    2.24
   5 -13  -3   12.63    2.54
   5 -13  -3    8.17    2.08
   5 -13  -3    9.84    3.25
   5  13  -2   23.44    2.95
  -5 -13   2   28.36    3.92
   5  13  -2   26.88    3.07
   5 -13  -2   26.82    3.19
   5 -13  -2   27.12    2.53
   5 -13  -2   19.98    3.57
   5 -13  -1   15.56    2.91
   5  13  -1   17.01    2.62
  -5 -13   1   21.58    3.77
   5 -13  -1   20.80    3.79
   5  13  -1   17.40    2.75
  -5 -13   0  484.92   22.08
   5  13   0  481.27   22.04
  -5 -13   0  535.98   23.32
   5  13   0  475.97   22.42
  -5 -13  -1   35.17    3.33
   5  13   1   33.43    3.29
  -5 -13  -1   36.62    3.99
   5 -13   1   25.54    4.07
   5  13   1   31.67    3.73
   5  13   2    5.61    2.65
   5  13   2    4.04    2.14
  -5 -13  -2    5.27    2.39
  -5 -13  -2    4.20    2.83
   5 -13   2    8.01    3.13
   5  13   3   13.39    2.61
   5 -13   3   12.73    3.28
   5  13   3   15.05    3.00
  -5 -13  -3   17.43    2.71
   5 -13   4    5.18    2.67
   5  13   4    4.02    2.41
  -5 -13  -4    4.51    2.52
  -5 -13  -5   54.64    4.69
   5  13   5   58.55    4.34
   5  13   5   55.34    4.55
  -5 -13  -6  194.07   10.29
   5  13   6  189.31    9.84
   5  13   6  197.42    9.98
   5  13   7    0.30    2.08
   5  13   7    0.30    2.00
   5  13   8   66.08    4.26
   5  13   8   62.05    4.05
   5  13   9   56.24    3.69
   5  13  10    2.67    1.38
  -5 -14   9    7.60    1.47
   5 -14  -9    8.18    1.48
   5 -14  -9    7.07    1.68
  -5 -14   8   44.90    3.16
   5 -14  -8   41.46    3.07
   5 -14  -8   46.05    3.35
  -5  14   8   46.87    3.06
  -5  14   7   39.26    2.96
   5 -14  -7   35.93    3.12
  -5 -14   7   36.68    3.10
   5 -14  -7   38.95    3.13
  -5  14   6    2.11    1.77
   5 -14  -6    2.51    1.96
   5 -14  -6    1.51    1.86
   5 -14  -6   -0.68    2.38
   5 -14  -5   22.41    2.83
   5 -14  -5   19.80    2.63
   5 -14  -5   16.22    3.23
  -5  14   5   19.81    2.50
   5 -14  -4   22.78    2.94
  -5  14   4   24.06    2.62
   5 -14  -4   23.79    2.65
   5 -14  -4   21.56    3.49
   5  14  -3   48.58    3.58
   5  14  -3   49.34    3.74
   5 -14  -3   52.85    4.00
  -5  14   3   50.37    3.75
   5 -14  -3   51.34    3.61
   5 -14  -3   41.33    4.57
   5  14  -2  163.67    8.93
   5  14  -2  179.01    8.93
   5 -14  -2  178.83    9.27
   5 -14  -2  165.29   10.20
   5  14  -1   78.69    5.24
   5  14  -1   81.78    5.05
  -5 -14   1   90.93    6.27
   5 -14  -1   76.02    6.31
   5  14   0    1.51    2.18
  -5 -14   0    0.48    2.71
   5 -14   0   -1.20    3.04
   5  14   0    1.89    2.40
   5  14   1  180.03    9.40
  -5 -14  -1  174.13    9.05
   5  14   1  174.64    9.00
  -5 -14  -1  191.09   10.09
   5 -14   1  175.26   10.35
  -5 -14  -2   12.64    2.45
   5  14   2   15.40    2.56
  -5 -14  -2   15.98    3.23
   5 -14   2   15.79    3.40
   5  14   2   14.74    2.90
   5  14   3   40.93    3.82
  -5 -14  -3   44.81    3.76
   5  14   3   36.60    3.50
  -5 -14  -3   43.83    4.28
   5 -14   3   38.49    4.23
   5 -14   4    8.16    2.63
  -5 -14  -4   13.18    2.67
  -5 -14  -5   97.01    5.99
   5  14   5   93.18    5.61
   5  14   5   86.12    5.72
  -5 -14  -6   65.41    4.81
   5  14   6   65.80    4.56
   5  14   6   67.60    4.46
   5  14   7   72.87    4.51
   5  14   7   68.88    4.36
   5  14   8   20.37    2.09
   5  14   8   16.93    2.17
   5  14   9   36.25    2.57
   5 -15  -8   11.70    1.81
  -5 -15   8   10.66    1.58
   5 -15  -8    9.35    1.66
   5  15  -8   15.34    1.85
  -5 -15   7    6.33    1.63
   5 -15  -7    8.21    1.86
   5  15  -7    7.45    1.90
   5 -15  -7    6.88    1.77
  -5  15   7    6.34    1.52
  -5 -15   6  121.97    6.72
   5 -15  -6  114.19    6.29
  -5  15   6  114.33    6.07
   5  15  -6  123.04    6.32
   5 -15  -6  120.39    6.38
   5 -15  -5    2.59    1.81
  -5 -15   5    3.17    2.26
   5 -15  -5    2.51    2.05
   5  15  -5   -1.56    1.93
   5 -15  -5    5.53    2.50
  -5  15   5    3.35    1.66
   5 -15  -4   45.66    3.39
  -5 -15   4   46.78    4.02
   5 -15  -4   47.53    3.70
  -5  15   4   44.39    3.31
   5 -15  -4   40.81    4.38
   5  15  -4   49.74    3.65
  -5 -15   3   31.13    3.54
   5 -15  -3   32.26    3.24
   5  15  -3   30.35    2.97
  -5  15   3   31.17    2.77
   5 -15  -3   23.52    3.76
   5  15  -3   26.26    2.57
   5  15  -2   72.08    4.71
   5  15  -2   81.67    4.78
   5 -15  -2   71.93    5.06
  -5  15   2   79.96    4.69
   5 -15  -2   74.67    5.97
  -5 -15   2   84.21    5.95
   5 -15  -1    0.56    3.04
  -5 -15   1    3.08    2.88
   5  15  -1    1.80    2.01
   5  15  -1    1.05    2.07
   5 -15   0    3.69    3.20
  -5 -15   0    5.56    3.03
   5  15   0    3.26    2.14
   5  15   0   10.33    2.36
   5 -15   1    6.40    3.23
   5  15   1   11.35    2.33
  -5 -15  -1   11.90    3.14
   5  15   1    9.86    2.56
  -5 -15  -2  263.17   12.98
   5 -15   2  259.09   14.02
   5  15   2  283.69   12.98
  -5 -15  -2  301.28   13.93
   5  15   2  265.50   13.26
   5 -15   3    6.84    2.79
  -5 -15  -3   11.84    2.91
   5  15   3   14.06    2.37
  -5 -15  -3   14.11    2.47
   5  15   3   16.72    2.87
  -5 -15  -4   68.55    4.66
   5  15   4   68.61    4.52
  -5 -15  -4   72.69    5.15
   5  15   5    8.84    2.18
  -5 -15  -5    8.95    2.30
  -5 -15  -5   11.32    2.60
   5  15   5    8.07    2.26
  -5 -15  -6   23.46    2.83
   5  15   6   24.66    2.53
   5  15   6   20.97    2.63
  -5 -15  -7   36.40    3.09
   5  15   7   31.10    2.59
   5  15   7   29.32    2.63
  -5 -15  -8   64.01    3.87
   5  15   8   58.31    3.41
   5  15   8   60.03    3.49
   5 -16  -7   34.30    2.57
   5  16  -7   39.04    2.51
   5 -16  -7   31.48    2.50
   5 -16  -6   15.87    1.90
  -5 -16   6   14.05    1.85
   5 -16  -6   14.70    2.03
   5  16  -6   16.43    1.95
   5 -16  -5   45.86    3.91
   5 -16  -5   43.05    3.36
   5  16  -5   48.86    3.24
  -5 -16   5   45.18    3.56
   5 -16  -4   -0.44    2.30
   5 -16  -4    0.68    1.94
   5  16  -4    1.48    1.72
  -5 -16   4    0.49    1.91
   5 -16  -3   43.36    3.56
   5 -16  -3   36.91    4.04
   5  16  -3   49.15    3.34
  -5 -16   3   47.61    3.91
   5 -16  -2   66.77    5.25
   5  16  -2   62.28    3.90
  -5 -16   2   56.30    4.52
   5  16  -2   60.50    3.95
   5  16  -1  122.54    6.39
   5  16  -1  110.47    6.42
   5  16   0   11.37    2.42
  -5 -16   0   12.44    2.98
   5  16   0   13.92    2.17
   5 -16   0   12.60    3.16
   5  16   1   61.94    3.99
  -5 -16  -1   58.38    4.87
   5  16   1   57.42    4.18
   5 -16   1   58.05    5.08
   5  16   2   10.52    2.35
   5  16   2   11.95    2.17
  -5 -16  -2    4.37    2.56
   5 -16   2   10.63    2.87
   5  16   3   47.32    3.42
  -5 -16  -3   54.81    4.25
   5  16   3   48.91    3.82
   5 -16   3   39.55    3.99
   5  16   4    5.62    1.86
  -5 -16  -4    7.90    2.39
   5  16   4    3.06    2.05
  -5 -16  -5   77.91    4.83
   5  16   5   72.37    4.17
   5  16   5   64.70    4.37
  -5 -16  -6    4.12    1.89
   5  16   6    5.54    1.48
   5  16   6    3.86    1.61
  -5 -16  -7   22.08    2.27
   5  16   7   21.08    1.97
   5  16   7   20.19    1.75
   5  17  -6   97.90    4.56
   5 -17  -6   82.18    4.74
   5 -17  -5    8.21    1.77
   5  17  -5   11.54    1.53
  -5 -17   5   10.87    1.89
   5 -17  -4    9.73    2.30
  -5 -17   4   12.06    2.09
   5  17  -4    9.54    1.67
   5 -17  -3   14.37    2.71
  -5 -17   3   20.97    2.56
   5  17  -3   21.29    2.10
   5 -17  -2   16.74    2.93
   5  17  -2   21.69    2.14
   5  17  -2   15.26    1.83
  -5 -17   2   22.44    2.58
   5  17  -1   49.69    3.18
  -5 -17   1   42.55    3.57
   5  17  -1   39.91    3.03
   5 -17   0    4.65    2.49
   5  17   0    5.65    1.84
  -5 -17   0    5.09    2.39
   5  17   0    5.71    1.77
   5 -17   1   15.22    2.73
   5  17   1   19.33    2.39
  -5 -17  -1   18.14    2.85
   5  17   1   16.59    2.11
   5 -17   2    5.72    2.23
   5  17   2   14.06    2.27
  -5 -17  -2   11.89    2.61
   5  17   2   11.22    1.86
   5  17   3    1.84    1.83
   5  17   3    0.28    1.47
  -5 -17  -3   -0.65    2.07
   5  17   4    6.58    1.91
  -5 -17  -4    8.42    2.16
   5  17   4    8.55    1.61
   5  17   5   39.34    2.57
  -5 -17  -5   46.39    3.31
  -5 -17  -6   53.97    3.10
   5  17   6   50.55    2.85
   5  17   6   53.64    3.23
  -5 -17  -6   59.93    3.57
  -5 -18   4    0.50    1.36
   5 -18  -3    8.12    2.06
  -5 -18   3   10.71    1.80
   5 -18  -2    0.87    1.79
   5  18  -2    2.11    1.27
  -5 -18   2    1.59    1.52
  -5 -18   1   55.74    3.54
   5  18  -1   49.32    2.90
   5  18   0    0.65    1.34
   5 -18   0    1.45    1.86
  -5 -18   0    2.05    1.67
   5  18   0    1.90    1.31
   5 -18   1   11.04    2.26
   5  18   1    6.79    1.43
   5  18   1    8.71    1.68
  -5 -18  -2   15.24    2.39
   5  18   2   14.51    1.92
  -5 -18  -3    6.65    1.88
   5  18   3    3.53    1.52
  -5 -18  -4    0.37    1.52
   5  18   4    1.08    1.29
  -5 -19   1   10.18    1.55
  -5 -19   0    7.09    1.45
  -6   0  13   -0.13    1.52
   6   0 -13   -0.63    2.06
  -6   0  12   36.73    3.36
   6   0 -12   40.47    4.02
   6   0 -11    2.53    2.67
   6   0 -10  283.50   15.46
  -6   0  10  313.33   14.09
  -6   0   9    0.91    1.78
  -6   0   9    0.51    3.52
  -6   0   9    1.33    1.73
   6   0  -9    1.77    2.90
  -6   0   9   -1.02    4.73
  -6   0   8    6.52    1.95
  -6   0   8    8.49    3.82
  -6   0   8    7.94    2.12
   6   0  -8    1.79    3.09
  -6   0   8    3.17    4.60
  -6   0   7   -0.26    1.67
  -6   0   7   -0.48    3.57
  -6   0   7   -0.14    1.67
  -6   0   7   -1.06    4.32
   6   0  -7    0.29    2.77
  -6   0   6   57.29    6.20
   6   0  -6   57.64    4.98
  -6   0   6   47.83    8.03
  -6   0   6   59.86    3.95
  -6   0   6   39.26    4.30
  -6   0   5   -0.74    2.17
  -6   0   5   -0.43    3.29
   6   0  -5   -0.49    2.52
   6   0  -5    1.07    1.80
  -6   0   5   -1.00    4.24
   6   0  -5   -0.88    4.77
  -6   0   4  118.46    8.00
   6   0  -4  104.43   10.14
  -6   0   4   92.07   10.41
  -6   0   4   76.52    6.02
   6   0  -4  101.21    5.51
   6   0  -4  100.74    6.36
  -6   0   3   -0.89    3.81
   6   0  -3    0.24    1.54
  -6   0   3    0.38    2.76
   6   0  -3    4.94    4.29
   6   0  -3   -0.20    2.02
  -6   0   2    6.87    4.28
   6   0  -2    7.21    2.07
   6   0  -2   11.09    4.67
   6   0  -2    7.84    1.78
   6   0  -1    0.67    1.74
   6   0  -1    3.11    3.70
   6   0  -1    0.34    1.51
   6   0   0  117.11    6.81
   6   0   0  155.92   11.00
   6   0   1    0.81    1.68
   6   0   1    1.97    1.51
   6   0   1   -0.50    1.83
   6   0   1    5.21    3.92
   6   0   2 1143.37   50.11
   6   0   2 1170.04   49.53
   6   0   2 1239.46   55.53
   6   0   2 1120.71   49.48
   6   0   3    0.83    1.68
   6   0   3    0.69    1.58
   6   0   4   30.22    2.86
   6   0   4   29.72    2.57
   6   0   4   32.03    2.54
   6   0   5    1.89    1.91
   6   0   5   -1.20    1.55
   6   0   6  230.44   11.04
   6   0   7    3.36    2.23
   6   0   7    1.79    1.92
   6   0   7   -1.11    2.68
   6   0   8  142.17    8.41
   6   0   8  150.54    7.58
   6   0   8  130.18    7.54
   6   0   8  147.93    7.52
   6   0   9    1.38    1.91
   6   0   9    0.92    2.89
   6   0   9    0.50    2.24
   6   0   9    1.26    2.34
   6   0  10   83.50    5.93
   6   0  10   88.07    5.26
   6   0  11   -2.24    2.31
   6   0  11    1.74    1.89
   6   0  12    8.33    2.14
   6   0  12    7.41    1.72
   6   0  13   -0.09    1.32
   6   0  13    0.45    1.00
   6   1 -13   44.58    3.68
  -6   1  13   46.91    3.33
   6   1 -12    2.25    2.54
  -6   1  12    7.90    2.24
   6   1 -11   33.14    4.05
[truncated: 134,303 more chars]
