# Supplementary material for: Single Crystal Structure Analysis of Three Novel Iron(II) Coordination Polymers with Bridging 1,3,5-Tris(1H-1,2,4-triazol-1-yl)methyl)benzene
Source: Preprints.org preprint supplement (doi:10.20944/preprints202309.1826.v1), 2023-09-27
Supplement: Supplementary file 4 [file supplementary › Fe(1-ttmb)(NCS).cif]

data_fe(1-ttmb)(ncs)
_publcif_datablock.id '{63d587e5-57c5-4c67-a08c-4259a45891b3}'
loop_
_publcif_info_datablock.id
_publcif_info_datablock.publ_exptl
_publcif_info_datablock.publ_geom
_publcif_info_datablock.structure
'{63d587e5-57c5-4c67-a08c-4259a45891b3}' y y y

_audit_update_record
;
2023-05-29 # Formatted by publCIF

;

# publcif _publ_body_element loop start
loop_
_publ_body_element
_publ_body_title
_publ_body_contents

 section 
;
Introduction
; 
;

;
 section 
;
Experimental
; 
;

;
 subsection 
;
Synthesis and crystallization
; 
;

;
 subsection 
;
Refinement
;
;
Crystal data, data collection and structure refinement details are summarized
in Table 1.
;

 section 
;
Results and discussion
; 
;

;
# publcif _publ_body_element loop end
_audit_creation_date               2023-01-26
_audit_creation_method
;
Olex2 1.5
(compiled 2022.04.07 svn.rca3783a0 for OlexSys, GUI svn.r6498)
;
_shelx_SHELXL_version_number       '2017/1'
_audit_contact_author_address      ?
_audit_contact_author_email        ?
_audit_contact_author_name         ''
_audit_contact_author_phone        ?
_publ_contact_author_id_orcid      ?
_publ_section_references
;
Dolomanov, O. V., Bourhis, L. J., Gildea, R. J., Howard, J. A. K. & Puschmann,
H. (2009). <i>J. Appl. Cryst.</i> <b>42</b>, 339--341.

Sheldrick, G. M. (2008). <i>Acta Cryst.</i> A<b>64</b>, 112--122.

Sheldrick, G. M. (2015). <i>Acta Cryst.</i> A<b>71</b>, 3--8.
;
_chemical_name_common              ?
_chemical_name_systematic          ?
_chemical_formula_moiety           'C32 H30 Fe N20 S2'
_chemical_formula_sum              'C32 H30 Fe N20 S2'
_chemical_formula_weight           814.73
_chemical_melting_point            ?
_chemical_oxdiff_formula           FeC15H15N10S
_chemical_oxdiff_usercomment       'Messung bei RT'
loop_
  _atom_type_symbol
  _atom_type_description
  _atom_type_scat_dispersion_real
  _atom_type_scat_dispersion_imag
  _atom_type_scat_source
 'C' 'C' 0.0181 0.0091 'International Tables Vol C Tables 4.2.6.8 and 6.1.1.4'
 'H' 'H' 0.0000 0.0000 'International Tables Vol C Tables 4.2.6.8 and 6.1.1.4'
 'Fe' 'Fe' -1.1336 3.1974
 'International Tables Vol C Tables 4.2.6.8 and 6.1.1.4'
 'N' 'N' 0.0311 0.0180 'International Tables Vol C Tables 4.2.6.8 and 6.1.1.4'
 'S' 'S' 0.3331 0.5567 'International Tables Vol C Tables 4.2.6.8 and 6.1.1.4'

_shelx_space_group_comment
;
The symmetry employed for this shelxl refinement is uniquely defined
by the following loop, which should always be used as a source of
symmetry information in preference to the above space-group names.
They are only intended as comments.
;
_space_group_crystal_system        triclinic
_space_group_IT_number             2
_space_group_name_H-M_alt          'P -1'
_space_group_name_Hall             '-P 1'
loop_
  _space_group_symop_operation_xyz
 'x, y, z'
 '-x, -y, -z'

_cell_length_a                     8.5918(4)
_cell_length_b                     9.4947(3)
_cell_length_c                     11.7005(3)
_cell_angle_alpha                  80.490(2)
_cell_angle_beta                   85.194(3)
_cell_angle_gamma                  89.497(3)
_cell_volume                       938.05(6)
_cell_formula_units_Z              1
_cell_measurement_reflns_used      5264
_cell_measurement_temperature      297.97(10)
_cell_measurement_theta_max        75.2770
_cell_measurement_theta_min        3.9040
_shelx_estimated_absorpt_T_max     0.765
_shelx_estimated_absorpt_T_min     0.579
_exptl_absorpt_coefficient_mu      4.722
_exptl_absorpt_correction_T_max    0.64098
_exptl_absorpt_correction_T_min    0.61843
_exptl_absorpt_correction_type     sphere
_exptl_absorpt_process_details
;
CrysAlisPro 1.171.41.90a (Rigaku Oxford Diffraction, 2020)
Spherical absorption correction
using equivalent radius and absorption coefficient.
Empirical absorption correction using spherical harmonics,
implemented in SCALE3 ABSPACK scaling algorithm.
;
_exptl_absorpt_special_details     ?
_exptl_crystal_colour              'clear colourless'
_exptl_crystal_colour_lustre       clear
_exptl_crystal_colour_primary      colourless
_exptl_crystal_density_diffrn      1.442
_exptl_crystal_density_meas        ?
_exptl_crystal_density_method      'not measured'
_exptl_crystal_description         block
_exptl_crystal_F_000               420
loop_
  _exptl_crystal_face_index_h
  _exptl_crystal_face_index_k
  _exptl_crystal_face_index_l
  _exptl_crystal_face_perp_dist
 1 5 6 0.0457
 0 3 7 0.0539
 1 4 6 0.0476
 0 -5 -6 0.0112
 -2 4 -5 0.0503
 2 0 7 0.0625
 -2 -3 6 0.0735
 2 6 0 0.0582
 1 0 -7 0.0313
 -5 -3 0 0.0383
 5 1 -2 0.0186
 5 2 3 0.0297
 -6 0 0 0.0495
 -4 2 -5 0.0378
 5 0 -1 0.0112

_exptl_crystal_size_max            0.13
_exptl_crystal_size_mid            0.07
_exptl_crystal_size_min            0.06
_exptl_crystal_size_rad            0.042
loop_
  _exptl_oxdiff_crystal_face_indexfrac_h
  _exptl_oxdiff_crystal_face_indexfrac_k
  _exptl_oxdiff_crystal_face_indexfrac_l
  _exptl_oxdiff_crystal_face_x
  _exptl_oxdiff_crystal_face_y
  _exptl_oxdiff_crystal_face_z
 0.6846 4.8214 5.6225 -0.0077 -0.0495 -0.9987
 0.4416 3.2155 7.0449 0.0738 0.2932 -0.9532
 0.6929 4.4319 6.0879 0.0262 0.0408 -0.9988
 -0.4857 -4.9123 -5.5182 0.0481 0.0563 0.9973
 -1.6819 4.0314 -4.5304 -0.6076 -0.7942 -0.0091
 1.7143 -0.3781 7.2025 0.4820 0.6341 -0.6046
 -1.5730 -2.6456 5.7011 0.0233 0.9781 -0.2066
 1.7674 5.7005 -0.3009 -0.0224 -0.8114 -0.5841
 1.0453 0.2525 -7.1579 -0.0176 -0.8088 0.5879
 -5.0001 -2.6353 -0.0389 -0.6861 0.6509 0.3249
 5.0780 1.2320 -1.9148 0.7263 -0.6873 -0.0091
 4.9796 2.4546 2.7307 0.7590 -0.3630 -0.5405
 -5.5428 -0.2357 0.1265 -0.9012 0.4285 0.0656
 -3.7226 1.8940 -5.0762 -0.8435 -0.4583 0.2802
 5.4192 0.3133 -1.0637 0.8534 -0.5212 0.0091

_exptl_transmission_factor_max     ?
_exptl_transmission_factor_min     ?
_diffrn_reflns_av_R_equivalents    0.0387
_diffrn_reflns_av_unetI/netI       0.0401
_diffrn_reflns_Laue_measured_fraction_full  0.992
_diffrn_reflns_Laue_measured_fraction_max  0.992
_diffrn_reflns_limit_h_max         10
_diffrn_reflns_limit_h_min         -10
_diffrn_reflns_limit_k_max         10
_diffrn_reflns_limit_k_min         -11
_diffrn_reflns_limit_l_max         11
_diffrn_reflns_limit_l_min         -13
_diffrn_reflns_number              10116
_diffrn_reflns_point_group_measured_fraction_full  0.992
_diffrn_reflns_point_group_measured_fraction_max  0.992
_diffrn_reflns_theta_full          67.031
_diffrn_reflns_theta_max           67.031
_diffrn_reflns_theta_min           3.844
_diffrn_ambient_environment        air
_diffrn_ambient_temperature        297.97(10)
_diffrn_detector                   'Hybrid Pixel Array Detector'
_diffrn_detector_area_resol_mean   10.0000
_diffrn_detector_type              HyPix
_diffrn_measured_fraction_theta_full  0.992
_diffrn_measured_fraction_theta_max  0.992
_diffrn_measurement_details
;
List of Runs (angles in degrees, time in seconds):

  # Type    Start    End  Width  t~exp~   \w     \q     \k     \f   Frames
--------------------------------------------------------------------------
  1  \w    -87.00 -35.00   0.50    0.38    --  -49.31 -66.00   7.00  104
  2  \w   -115.00 -89.00   0.50    0.38    --  -49.31 -66.00   7.00   52
  3  \w     64.00  98.00   0.50    0.38    --   49.31  66.00 142.00   68
  4  \w     -2.00  30.00   0.50    0.38    --   49.31 -66.00   7.00   64
  5  \w    -80.00 -24.00   0.50    1.50    --  -90.00  66.00 142.00  112
  6  \w   -117.00 -74.00   0.50    1.50    --  -90.00 -66.00   7.00   86
  7  \w   -158.00-132.00   0.50    1.50    --  -90.00 -66.00   7.00   52
  8  \w     43.00  70.00   0.50    1.50    --  109.38 -66.00   7.00   54
  9  \w    -60.00 -13.00   0.50    0.38    --  -49.31 125.00  30.00   94
 10  \w    -60.00  19.00   0.50    0.38    --  -49.31  66.00 142.00  158
 11  \w     38.00  93.00   0.50    0.38    --   49.31-125.00-120.00  110
 12  \w    -10.00  16.00   0.50    0.38    --   49.31 -19.00   0.00   52
 13  \w    -44.00 -19.00   0.50    1.50    --  -90.00  38.00 -60.00   50
 14  \w    -48.00 -22.00   0.50    1.50    --  -90.00  38.00 150.00   52
 15  \w    -48.00 -21.00   0.50    1.50    --  -90.00  38.00 -90.00   54
 16  \w    -48.00 -18.00   0.50    1.50    --  -90.00  38.00  90.00   60
 17  \w   -155.00 -92.00   0.50    1.50    --  -90.00 -77.00  60.00  126
 18  \w   -152.00 -87.00   0.50    1.50    --  -90.00 -19.00 -60.00  130
 19  \w    -46.00 -21.00   0.50    1.50    --  -90.00  38.00 -30.00   50
 20  \w   -112.00 -87.00   0.50    1.50    --  -90.00 -19.00 -90.00   50
 21  \w    -48.00 -22.00   0.50    1.50    --  -90.00  38.00-120.00   52
 22  \w   -163.00-125.00   0.50    1.50    --  -90.00 -19.00 -90.00   76
 23  \w   -134.00 -74.00   0.50    1.50    --  -90.00-125.00 150.00  120
 24  \w     69.00  95.00   0.50    1.50    --  109.38 -99.00  30.00   52
 25  \w     76.00 104.00   0.50    1.50    --  109.38 -99.00-150.00   56
 26  \w     47.00 103.00   0.50    1.50    --  109.38 -99.00 -60.00  112
 27  \w     49.00 112.00   0.50    1.50    --  109.38-125.00  90.00  126
 28  \w     70.00 102.00   0.50    1.50    --  109.38-125.00-150.00   64
 29  \w     37.00  96.00   0.50    1.50    --  109.38 -77.00-180.00  118
 30  \w     45.00  88.00   0.50    1.50    --  109.38 -77.00 120.00   86
 31  \w     43.00  68.00   0.50    1.50    --  109.38-125.00-150.00   50
 32  \w    144.00 177.00   0.50    1.50    --  109.38 125.00   0.00   66
 33  \w     66.00 117.00   0.50    1.50    --  109.38-133.00  22.46  102
 34  \w     98.00 132.00   0.50    1.50    --  109.38 125.00   0.00   68
 35  \w     54.00 104.00   0.50    1.50    --  109.38 -99.00  90.00  100
 36  \w     81.00 106.00   0.50    1.50    --  109.38 -99.00 -30.00   50
 37  \w     48.00  74.00   0.50    1.50    --  109.38 -99.00 -30.00   52
 38  \w     99.00 172.00   0.50    1.50    --  109.38  66.00 142.00  146
;
_diffrn_measurement_device         'four-circle diffractometer'
_diffrn_measurement_device_type    'XtaLAB Synergy, Dualflex, HyPix'
_diffrn_measurement_method         '\w scans'
_diffrn_orient_matrix_type        
 'CrysAlisPro convention (1999,Acta A55,543-557)'
_diffrn_orient_matrix_UB_11        0.1654392000
_diffrn_orient_matrix_UB_12        -0.0539125000
_diffrn_orient_matrix_UB_13        0.0247197000
_diffrn_orient_matrix_UB_21        -0.0701431000
_diffrn_orient_matrix_UB_22        -0.1153755000
_diffrn_orient_matrix_UB_23        0.0986781000
_diffrn_orient_matrix_UB_31        -0.0094014000
_diffrn_orient_matrix_UB_32        -0.1041554000
_diffrn_orient_matrix_UB_33        -0.0871739000
_diffrn_radiation_monochromator    mirror
_diffrn_radiation_probe            x-ray
_diffrn_radiation_type             'Cu K\a'
_diffrn_radiation_wavelength       1.54184
_diffrn_source                     'micro-focus sealed X-ray tube'
_diffrn_source_type                'PhotonJet (Cu) X-ray Source'
_reflns_Friedel_coverage           0.000
_reflns_Friedel_fraction_full      .
_reflns_Friedel_fraction_max       .
_reflns_number_gt                  3006
_reflns_number_total               3321
_reflns_special_details
;
 Reflections were merged by SHELXL according to the crystal
 class for the calculation of statistics and refinement.
 
 Structure factors included contributions from the .fab file.
 
 _reflns_Friedel_fraction is defined as the number of unique
 Friedel pairs measured divided by the number that would be
 possible theoretically, ignoring centric projections and
 systematic absences.
;
_reflns_threshold_expression       'I > 2\s(I)'
_computing_cell_refinement         'CrysAlisPro 1.171.41.90a (Rigaku OD, 2020)'
_computing_data_collection         'CrysAlisPro 1.171.41.90a (Rigaku OD, 2020)'
_computing_data_reduction          'CrysAlisPro 1.171.41.90a (Rigaku OD, 2020)'
_computing_molecular_graphics      'Olex2 1.5 (Dolomanov et al., 2009)'
_computing_publication_material    'Olex2 1.5 (Dolomanov et al., 2009)'
_computing_structure_refinement    'XL  (Sheldrick, 2008)'
_computing_structure_solution      'SHELXT 2014/5 (Sheldrick, 2014)'
_refine_diff_density_max           0.301
_refine_diff_density_min           -0.417
_refine_diff_density_rms           0.046
_refine_ls_extinction_coef         .
_refine_ls_extinction_method       none
_refine_ls_goodness_of_fit_ref     1.076
_refine_ls_hydrogen_treatment      constr
_refine_ls_matrix_type             full
_refine_ls_number_parameters       250
_refine_ls_number_reflns           3321
_refine_ls_number_restraints       0
_refine_ls_R_factor_all            0.0418
_refine_ls_R_factor_gt             0.0383
_refine_ls_restrained_S_all        1.076
_refine_ls_shift/su_max            0.001
_refine_ls_shift/su_mean           0.000
_refine_ls_structure_factor_coef   Fsqd
_refine_ls_weighting_details      
 'w=1/[\s^2^(Fo^2^)+(0.0594P)^2^+0.0930P] where P=(Fo^2^+2Fc^2^)/3'
_refine_ls_weighting_scheme        calc
_refine_ls_wR_factor_gt            0.1011
_refine_ls_wR_factor_ref           0.1035
_refine_special_details
;
 Refinement of F^2^ against ALL reflections. The weighted R-factor wR and
 goodness of fit S are based on F^2^, conventional R-factors R are based
 on F, with F set to zero for negative F^2^. The threshold expression of
 F^2^ > 2sigma(F^2^) is used only for calculating R-factors(gt) etc. and is
 not relevant to the choice of reflections for refinement.  R-factors based
 on F^2^ are statistically about twice as large as those based on F, and R-
 factors based on ALL data will be even larger.
;
_olex2_refinement_description
;
1. Fixed Uiso
 At 1.2 times of:
  All C(H) groups, All C(H,H) groups
2.a Secondary CH2 refined with riding coordinates:
 C3(H3A,H3B), C10(H10A,H10B), C13(H13A,H13B)
2.b Aromatic/amide H refined with riding coordinates:
 C1(H1), C2(H2), C5(H5), C7(H7), C9(H9), C11(H11), C12(H12), C14(H14), C15(H15)
;
_atom_sites_solution_hydrogens     geom
_atom_sites_solution_primary       dual
_atom_sites_solution_secondary     ?
loop_
  _atom_site_label
  _atom_site_type_symbol
  _atom_site_fract_x
  _atom_site_fract_y
  _atom_site_fract_z
  _atom_site_U_iso_or_equiv
  _atom_site_adp_type
  _atom_site_occupancy
  _atom_site_site_symmetry_order
  _atom_site_calc_flag
  _atom_site_refinement_flags_posn
  _atom_site_refinement_flags_adp
  _atom_site_refinement_flags_occupancy
  _atom_site_disorder_assembly
  _atom_site_disorder_group
 Fe1 Fe 0.500000 1.000000 0.000000 0.03866(15) Uani 1 2 d S . P . .
 S1 S 0.28806(10) 1.00406(8) 0.37625(6) 0.0752(2) Uani 1 1 d . . . . .
 N1 N 0.4121(2) 0.78522(18) 0.06856(15) 0.0434(4) Uani 1 1 d . . . . .
 N2 N 0.4192(3) 0.5521(2) 0.14190(19) 0.0602(5) Uani 1 1 d . . . . .
 N3 N 0.2814(2) 0.61077(18) 0.17659(15) 0.0424(4) Uani 1 1 d . . . . .
 N4 N 0.1452(3) 0.7343(3) 0.8612(2) 0.0731(6) Uani 1 1 d . . . . .
 N5 N 0.1488(2) 0.7973(2) 0.66774(19) 0.0577(5) Uani 1 1 d . . . . .
 N6 N 0.2750(2) 0.71677(18) 0.69616(16) 0.0454(4) Uani 1 1 d . . . . .
 N7 N 0.3064(2) 0.06175(18) 0.88855(15) 0.0431(4) Uani 1 1 d . . . . .
 N8 N 0.0854(2) 0.1645(3) 0.82965(18) 0.0592(5) Uani 1 1 d . . . . .
 N9 N 0.1812(2) 0.14133(17) 0.73766(14) 0.0399(4) Uani 1 1 d . . . . .
 N10 N 0.3694(2) 1.0802(2) 0.13957(17) 0.0554(5) Uani 1 1 d . . . . .
 C1 C 0.4916(3) 0.6614(2) 0.0766(2) 0.0550(6) Uani 1 1 d . . . . .
 H1 H 0.590272 0.654187 0.038837 0.066 Uiso 1 1 calc R U . . .
 C2 C 0.2803(2) 0.7480(2) 0.13252(19) 0.0445(5) Uani 1 1 d . . . . .
 H2 H 0.198314 0.809847 0.144802 0.053 Uiso 1 1 calc R U . . .
 C3 C 0.1627(3) 0.5264(2) 0.25360(19) 0.0490(5) Uani 1 1 d . . . . .
 H3A H 0.147995 0.437332 0.225435 0.059 Uiso 1 1 calc R U . . .
 H3B H 0.064643 0.577742 0.250451 0.059 Uiso 1 1 calc R U . . .
 C4 C 0.2019(2) 0.4931(2) 0.37877(17) 0.0391(4) Uani 1 1 d . . . . .
 C5 C 0.2747(2) 0.5922(2) 0.43276(18) 0.0423(5) Uani 1 1 d . . . . .
 H5 H 0.304032 0.680982 0.390387 0.051 Uiso 1 1 calc R U . . .
 C6 C 0.3035(2) 0.5596(2) 0.54858(18) 0.0412(4) Uani 1 1 d . . . . .
 C7 C 0.2606(2) 0.4260(2) 0.61152(18) 0.0419(4) Uani 1 1 d . . . . .
 H7 H 0.281072 0.403185 0.689201 0.050 Uiso 1 1 calc R U . . .
 C8 C 0.1877(2) 0.3270(2) 0.55903(17) 0.0376(4) Uani 1 1 d . . . . .
 C9 C 0.1592(2) 0.3621(2) 0.44273(17) 0.0384(4) Uani 1 1 d . . . . .
 H9 H 0.110306 0.295770 0.407293 0.046 Uiso 1 1 calc R U . . .
 C10 C 0.3813(3) 0.6690(2) 0.6065(2) 0.0497(5) Uani 1 1 d . . . . .
 H10A H 0.473254 0.627196 0.641159 0.060 Uiso 1 1 calc R U . . .
 H10B H 0.414690 0.750435 0.548333 0.060 Uiso 1 1 calc R U . . .
 C11 C 0.0761(3) 0.8038(3) 0.7697(3) 0.0611(6) Uani 1 1 d . . . . .
 H11 H -0.016919 0.853309 0.778111 0.073 Uiso 1 1 calc R U . . .
 C12 C 0.2698(4) 0.6823(3) 0.8103(2) 0.0655(7) Uani 1 1 d . . . . .
 H12 H 0.345082 0.627933 0.849897 0.079 Uiso 1 1 calc R U . . .
 C13 C 0.1361(3) 0.1796(2) 0.61901(18) 0.0486(5) Uani 1 1 d . . . . .
 H13A H 0.023254 0.173376 0.620592 0.058 Uiso 1 1 calc R U . . .
 H13B H 0.179963 0.110085 0.573359 0.058 Uiso 1 1 calc R U . . .
 C14 C 0.1660(3) 0.1153(3) 0.9180(2) 0.0552(6) Uani 1 1 d . . . . .
 H14 H 0.129164 0.117393 0.994726 0.066 Uiso 1 1 calc R U . . .
 C15 C 0.3106(2) 0.0800(2) 0.77421(18) 0.0430(5) Uani 1 1 d . . . . .
 H15 H 0.393277 0.053456 0.725906 0.052 Uiso 1 1 calc R U . . .
 C16 C 0.3346(3) 1.0522(2) 0.2385(2) 0.0465(5) Uani 1 1 d . . . . .

loop_
  _atom_site_aniso_label
  _atom_site_aniso_U_11
  _atom_site_aniso_U_22
  _atom_site_aniso_U_33
  _atom_site_aniso_U_23
  _atom_site_aniso_U_13
  _atom_site_aniso_U_12
 Fe1 0.0350(2) 0.0397(3) 0.0371(2) 0.00577(17) -0.00264(17) 0.00392(17)
 S1 0.0994(6) 0.0766(5) 0.0449(4) -0.0056(3) 0.0103(3) 0.0256(4)
 N1 0.0410(9) 0.0412(9) 0.0441(9) 0.0044(7) -0.0043(7) 0.0013(7)
 N2 0.0656(13) 0.0414(10) 0.0686(13) -0.0024(9) 0.0101(10) 0.0078(9)
 N3 0.0438(10) 0.0399(9) 0.0406(9) 0.0007(7) -0.0020(7) -0.0009(7)
 N4 0.0850(17) 0.0740(15) 0.0606(14) -0.0156(12) 0.0016(12) -0.0012(13)
 N5 0.0512(11) 0.0546(12) 0.0700(14) -0.0124(10) -0.0170(10) 0.0092(9)
 N6 0.0472(10) 0.0408(9) 0.0513(11) -0.0115(8) -0.0143(8) 0.0025(7)
 N7 0.0367(9) 0.0458(10) 0.0436(10) 0.0029(7) -0.0058(7) 0.0035(7)
 N8 0.0425(10) 0.0857(15) 0.0470(11) -0.0054(10) -0.0024(8) 0.0180(10)
 N9 0.0400(9) 0.0388(9) 0.0386(9) 0.0007(7) -0.0048(7) 0.0022(7)
 N10 0.0536(12) 0.0635(12) 0.0455(11) -0.0018(9) 0.0013(9) 0.0099(9)
 C1 0.0551(14) 0.0468(12) 0.0583(14) -0.0028(10) 0.0105(11) 0.0068(10)
 C2 0.0380(11) 0.0432(11) 0.0482(12) 0.0048(9) -0.0043(9) 0.0025(8)
 C3 0.0492(12) 0.0506(12) 0.0434(11) 0.0057(9) -0.0073(9) -0.0122(10)
 C4 0.0350(10) 0.0403(10) 0.0401(10) -0.0013(8) -0.0028(8) 0.0015(8)
 C5 0.0419(11) 0.0377(10) 0.0451(11) -0.0012(8) -0.0019(9) -0.0033(8)
 C6 0.0363(10) 0.0402(10) 0.0477(11) -0.0092(9) -0.0034(8) 0.0014(8)
 C7 0.0419(11) 0.0450(11) 0.0391(10) -0.0059(8) -0.0074(8) 0.0034(9)
 C8 0.0360(10) 0.0362(10) 0.0390(10) -0.0021(8) -0.0025(8) 0.0032(8)
 C9 0.0370(10) 0.0361(10) 0.0421(11) -0.0054(8) -0.0063(8) 0.0018(8)
 C10 0.0430(12) 0.0492(12) 0.0586(13) -0.0127(10) -0.0064(10) -0.0029(9)
 C11 0.0500(14) 0.0557(14) 0.0820(19) -0.0241(13) -0.0056(13) -0.0004(11)
 C12 0.0789(19) 0.0656(16) 0.0535(15) -0.0085(12) -0.0174(13) 0.0134(14)
 C13 0.0597(14) 0.0452(12) 0.0395(11) 0.0025(9) -0.0135(10) -0.0065(10)
 C14 0.0396(12) 0.0828(17) 0.0397(12) -0.0012(11) -0.0023(9) 0.0112(11)
 C15 0.0364(10) 0.0454(11) 0.0448(11) -0.0014(9) -0.0018(8) 0.0035(8)
 C16 0.0426(12) 0.0436(11) 0.0532(14) -0.0082(9) -0.0034(9) 0.0111(9)

_geom_special_details
;
 All esds (except the esd in the dihedral angle between two l.s. planes)
 are estimated using the full covariance matrix.  The cell esds are taken
 into account individually in the estimation of esds in distances, angles
 and torsion angles; correlations between esds in cell parameters are only
 used when they are defined by crystal symmetry.  An approximate (isotropic)
 treatment of cell esds is used for estimating esds involving l.s. planes.
;
loop_
  _geom_bond_atom_site_label_1
  _geom_bond_atom_site_label_2
  _geom_bond_distance
  _geom_bond_site_symmetry_2
  _geom_bond_publ_flag
 Fe1 N1 2.1813(17) 2_675 ?
 Fe1 N1 2.1813(17) . ?
 Fe1 N7 2.2150(17) 1_564 ?
 Fe1 N7 2.2150(17) 2_666 ?
 Fe1 N10 2.143(2) . ?
 Fe1 N10 2.143(2) 2_675 ?
 S1 C16 1.619(2) . ?
 N1 C1 1.348(3) . ?
 N1 C2 1.321(3) . ?
 N2 N3 1.364(3) . ?
 N2 C1 1.311(3) . ?
 N3 C2 1.320(3) . ?
 N3 C3 1.454(3) . ?
 N4 C11 1.342(4) . ?
 N4 C12 1.314(4) . ?
 N5 N6 1.354(3) . ?
 N5 C11 1.310(3) . ?
 N6 C10 1.459(3) . ?
 N6 C12 1.319(3) . ?
 N7 C14 1.345(3) . ?
 N7 C15 1.318(3) . ?
 N8 N9 1.346(3) . ?
 N8 C14 1.312(3) . ?
 N9 C13 1.460(3) . ?
 N9 C15 1.321(3) . ?
 N10 C16 1.158(3) . ?
 C1 H1 0.9300 . ?
 C2 H2 0.9300 . ?
 C3 H3A 0.9700 . ?
 C3 H3B 0.9700 . ?
 C3 C4 1.512(3) . ?
 C4 C5 1.396(3) . ?
 C4 C9 1.377(3) . ?
 C5 H5 0.9300 . ?
 C5 C6 1.382(3) . ?
 C6 C7 1.393(3) . ?
 C6 C10 1.518(3) . ?
 C7 H7 0.9300 . ?
 C7 C8 1.385(3) . ?
 C8 C9 1.388(3) . ?
 C8 C13 1.511(3) . ?
 C9 H9 0.9300 . ?
 C10 H10A 0.9700 . ?
 C10 H10B 0.9700 . ?
 C11 H11 0.9300 . ?
 C12 H12 0.9300 . ?
 C13 H13A 0.9700 . ?
 C13 H13B 0.9700 . ?
 C14 H14 0.9300 . ?
 C15 H15 0.9300 . ?

loop_
  _geom_angle_atom_site_label_1
  _geom_angle_atom_site_label_2
  _geom_angle_atom_site_label_3
  _geom_angle
  _geom_angle_site_symmetry_1
  _geom_angle_site_symmetry_3
  _geom_angle_publ_flag
 N1 Fe1 N1 180.0 2_675 . ?
 N1 Fe1 N7 95.59(6) . 1_564 ?
 N1 Fe1 N7 95.59(6) 2_675 2_666 ?
 N1 Fe1 N7 84.41(6) . 2_666 ?
 N1 Fe1 N7 84.41(6) 2_675 1_564 ?
 N7 Fe1 N7 180.00(9) 1_564 2_666 ?
 N10 Fe1 N1 89.91(7) . 2_675 ?
 N10 Fe1 N1 89.91(7) 2_675 . ?
 N10 Fe1 N1 90.09(7) 2_675 2_675 ?
 N10 Fe1 N1 90.09(7) . . ?
 N10 Fe1 N7 89.32(7) . 1_564 ?
 N10 Fe1 N7 89.32(7) 2_675 2_666 ?
 N10 Fe1 N7 90.68(7) 2_675 1_564 ?
 N10 Fe1 N7 90.68(7) . 2_666 ?
 N10 Fe1 N10 180.0 . 2_675 ?
 C1 N1 Fe1 127.84(15) . . ?
 C2 N1 Fe1 128.05(14) . . ?
 C2 N1 C1 102.84(17) . . ?
 C1 N2 N3 102.26(18) . . ?
 N2 N3 C3 121.47(18) . . ?
 C2 N3 N2 109.64(17) . . ?
 C2 N3 C3 128.87(19) . . ?
 C12 N4 C11 101.7(2) . . ?
 C11 N5 N6 102.3(2) . . ?
 N5 N6 C10 120.93(18) . . ?
 C12 N6 N5 108.8(2) . . ?
 C12 N6 C10 129.9(2) . . ?
 C14 N7 Fe1 128.36(15) . 1_546 ?
 C15 N7 Fe1 128.06(14) . 1_546 ?
 C15 N7 C14 102.52(17) . . ?
 C14 N8 N9 102.76(18) . . ?
 N8 N9 C13 121.43(18) . . ?
 C15 N9 N8 109.52(17) . . ?
 C15 N9 C13 129.04(19) . . ?
 C16 N10 Fe1 141.69(18) . . ?
 N1 C1 H1 122.6 . . ?
 N2 C1 N1 114.8(2) . . ?
 N2 C1 H1 122.6 . . ?
 N1 C2 H2 124.8 . . ?
 N3 C2 N1 110.43(19) . . ?
 N3 C2 H2 124.8 . . ?
 N3 C3 H3A 108.8 . . ?
 N3 C3 H3B 108.8 . . ?
 N3 C3 C4 113.86(17) . . ?
 H3A C3 H3B 107.7 . . ?
 C4 C3 H3A 108.8 . . ?
 C4 C3 H3B 108.8 . . ?
 C5 C4 C3 122.34(18) . . ?
 C9 C4 C3 118.67(18) . . ?
 C9 C4 C5 118.95(19) . . ?
 C4 C5 H5 119.7 . . ?
 C6 C5 C4 120.65(18) . . ?
 C6 C5 H5 119.7 . . ?
 C5 C6 C7 119.52(18) . . ?
 C5 C6 C10 120.08(19) . . ?
 C7 C6 C10 120.40(19) . . ?
 C6 C7 H7 119.8 . . ?
 C8 C7 C6 120.37(19) . . ?
 C8 C7 H7 119.8 . . ?
 C7 C8 C9 119.19(18) . . ?
 C7 C8 C13 124.75(18) . . ?
 C9 C8 C13 116.06(17) . . ?
 C4 C9 C8 121.32(18) . . ?
 C4 C9 H9 119.3 . . ?
 C8 C9 H9 119.3 . . ?
 N6 C10 C6 111.27(17) . . ?
 N6 C10 H10A 109.4 . . ?
 N6 C10 H10B 109.4 . . ?
 C6 C10 H10A 109.4 . . ?
 C6 C10 H10B 109.4 . . ?
 H10A C10 H10B 108.0 . . ?
 N4 C11 H11 122.3 . . ?
 N5 C11 N4 115.4(3) . . ?
 N5 C11 H11 122.3 . . ?
 N4 C12 N6 111.7(2) . . ?
 N4 C12 H12 124.2 . . ?
 N6 C12 H12 124.2 . . ?
 N9 C13 C8 114.52(17) . . ?
 N9 C13 H13A 108.6 . . ?
 N9 C13 H13B 108.6 . . ?
 C8 C13 H13A 108.6 . . ?
 C8 C13 H13B 108.6 . . ?
 H13A C13 H13B 107.6 . . ?
 N7 C14 H14 122.7 . . ?
 N8 C14 N7 114.5(2) . . ?
 N8 C14 H14 122.7 . . ?
 N7 C15 N9 110.66(18) . . ?
 N7 C15 H15 124.7 . . ?
 N9 C15 H15 124.7 . . ?
 N10 C16 S1 176.9(2) . . ?

loop_
  _geom_hbond_atom_site_label_D
  _geom_hbond_atom_site_label_H
  _geom_hbond_atom_site_label_A
  _geom_hbond_distance_DH
  _geom_hbond_distance_HA
  _geom_hbond_distance_DA
  _geom_hbond_angle_DHA
  _geom_hbond_site_symmetry_A
  _geom_hbond_publ_flag
 C2 H2 N8 0.93 2.45 3.256(3) 145.6 2_566 yes
 C12 H12 N2 0.93 2.64 3.484(4) 151.9 2_666 yes
 C13 H13B S1 0.97 2.75 3.668(2) 157.2 1_545 yes
 C15 H15 S1 0.93 2.98 3.877(2) 163.1 2_666 yes

loop_
  _geom_torsion_atom_site_label_1
  _geom_torsion_atom_site_label_2
  _geom_torsion_atom_site_label_3
  _geom_torsion_atom_site_label_4
  _geom_torsion
  _geom_torsion_site_symmetry_1
  _geom_torsion_site_symmetry_2
  _geom_torsion_site_symmetry_3
  _geom_torsion_site_symmetry_4
  _geom_torsion_publ_flag
 Fe1 N1 C1 N2 167.00(17) . . . . ?
 Fe1 N1 C2 N3 -167.50(14) . . . . ?
 Fe1 N7 C14 N8 168.91(17) 1_546 . . . ?
 Fe1 N7 C15 N9 -168.63(13) 1_546 . . . ?
 N2 N3 C2 N1 0.3(3) . . . . ?
 N2 N3 C3 C4 74.5(3) . . . . ?
 N3 N2 C1 N1 1.0(3) . . . . ?
 N3 C3 C4 C5 38.7(3) . . . . ?
 N3 C3 C4 C9 -143.6(2) . . . . ?
 N5 N6 C10 C6 -68.7(3) . . . . ?
 N5 N6 C12 N4 0.6(3) . . . . ?
 N6 N5 C11 N4 0.0(3) . . . . ?
 N8 N9 C13 C8 92.5(2) . . . . ?
 N8 N9 C15 N7 -0.5(2) . . . . ?
 N9 N8 C14 N7 -0.3(3) . . . . ?
 C1 N1 C2 N3 0.3(2) . . . . ?
 C1 N2 N3 C2 -0.7(3) . . . . ?
 C1 N2 N3 C3 -179.1(2) . . . . ?
 C2 N1 C1 N2 -0.8(3) . . . . ?
 C2 N3 C3 C4 -103.6(3) . . . . ?
 C3 N3 C2 N1 178.48(19) . . . . ?
 C3 C4 C5 C6 177.7(2) . . . . ?
 C3 C4 C9 C8 -178.01(19) . . . . ?
 C4 C5 C6 C7 0.6(3) . . . . ?
 C4 C5 C6 C10 -179.38(19) . . . . ?
 C5 C4 C9 C8 -0.2(3) . . . . ?
 C5 C6 C7 C8 -0.9(3) . . . . ?
 C5 C6 C10 N6 113.9(2) . . . . ?
 C6 C7 C8 C9 0.6(3) . . . . ?
 C6 C7 C8 C13 -179.9(2) . . . . ?
 C7 C6 C10 N6 -66.1(3) . . . . ?
 C7 C8 C9 C4 0.0(3) . . . . ?
 C7 C8 C13 N9 -5.1(3) . . . . ?
 C9 C4 C5 C6 0.0(3) . . . . ?
 C9 C8 C13 N9 174.41(18) . . . . ?
 C10 N6 C12 N4 -172.2(2) . . . . ?
 C10 C6 C7 C8 179.10(19) . . . . ?
 C11 N4 C12 N6 -0.6(3) . . . . ?
 C11 N5 N6 C10 173.26(19) . . . . ?
 C11 N5 N6 C12 -0.4(2) . . . . ?
 C12 N4 C11 N5 0.4(3) . . . . ?
 C12 N6 C10 C6 103.4(3) . . . . ?
 C13 N9 C15 N7 -179.25(18) . . . . ?
 C13 C8 C9 C4 -179.61(19) . . . . ?
 C14 N7 C15 N9 0.3(2) . . . . ?
 C14 N8 N9 C13 179.3(2) . . . . ?
 C14 N8 N9 C15 0.5(3) . . . . ?
 C15 N7 C14 N8 0.0(3) . . . . ?
 C15 N9 C13 C8 -88.9(3) . . . . ?

_smtbx_masks_special_details       ?
loop_
  _smtbx_masks_void_nr
  _smtbx_masks_void_average_x
  _smtbx_masks_void_average_y
  _smtbx_masks_void_average_z
  _smtbx_masks_void_volume
  _smtbx_masks_void_count_electrons
  _smtbx_masks_void_content
 1 0.000 0.500 0.000 44.0 8.7 ?

_smtbx_masks_void_probe_radius     1.2
_smtbx_masks_void_truncation_radius  1.2
_shelx_res_file
;
TITL fe(1-ttmb)(ncs)_a.res in P-1
    fe(1-ttmb)(ncs).res
    created by SHELXL-2017/1 at 15:46:31 on 26-Jan-2023
REM Old TITL Fe(1-ttmb)(NCS) in P-1
REM SHELXT solution in P-1
REM R1 0.165, Rweak 0.022, Alpha 0.042, Orientation as input
REM Formula found by SHELXT: C42 N10 S2 Fe
CELL 1.54184 8.5918 9.4947 11.7005 80.49 85.194 89.497
ZERR 1 0.0004 0.0003 0.0003 0.002 0.003 0.003
LATT 1
SFAC C H Fe N S
UNIT 32 30 1 20 2
EQIV $1 1-X,1-Y,1-Z
EQIV $2 -X,1-Y,1-Z
EQIV $3 +X,-1+Y,+Z

L.S. 50
PLAN  5
SIZE 0.06 0.07 0.13
TEMP 24.82(10)
CONF
HTAB C2 N8_$2
HTAB C12 N2_$1
HTAB C13 S1_$3
HTAB C15 S1_$1
BOND $H
list 4
MORE -1
ABIN
fmap 2 53
acta
REM <olex2.extras>
REM <HklSrc "%.\\Fe(1-ttmb)(NCS).hkl">
REM </olex2.extras>

WGHT    0.059400    0.093000
FVAR       0.77712
FE1   3    0.500000    1.000000    0.000000    10.50000    0.03499    0.03967 =
         0.03707    0.00577   -0.00264    0.00392
S1    5    0.288062    1.004058    0.376250    11.00000    0.09938    0.07663 =
         0.04495   -0.00561    0.01030    0.02561
N1    4    0.412057    0.785215    0.068555    11.00000    0.04096    0.04123 =
         0.04410    0.00442   -0.00426    0.00125
N2    4    0.419219    0.552077    0.141902    11.00000    0.06564    0.04140 =
         0.06858   -0.00244    0.01009    0.00782
N3    4    0.281404    0.610771    0.176594    11.00000    0.04380    0.03990 =
         0.04065    0.00069   -0.00196   -0.00094
N4    4    0.145161    0.734284    0.861241    11.00000    0.08505    0.07397 =
         0.06057   -0.01557    0.00159   -0.00116
N5    4    0.148778    0.797265    0.667736    11.00000    0.05115    0.05464 =
         0.06997   -0.01239   -0.01696    0.00921
N6    4    0.275015    0.716769    0.696157    11.00000    0.04720    0.04083 =
         0.05127   -0.01151   -0.01427    0.00252
N7    4    0.306360    0.061754    0.888548    11.00000    0.03670    0.04576 =
         0.04357    0.00293   -0.00578    0.00353
N8    4    0.085365    0.164504    0.829652    11.00000    0.04248    0.08573 =
         0.04699   -0.00543   -0.00242    0.01799
N9    4    0.181150    0.141330    0.737664    11.00000    0.03997    0.03883 =
         0.03860    0.00067   -0.00477    0.00224
N10   4    0.369384    1.080159    0.139574    11.00000    0.05356    0.06355 =
         0.04547   -0.00177    0.00130    0.00985
C1    1    0.491629    0.661425    0.076643    11.00000    0.05508    0.04681 =
         0.05826   -0.00284    0.01055    0.00682
AFIX  43
H1    2    0.590272    0.654187    0.038837    11.00000   -1.20000
AFIX   0
C2    1    0.280310    0.748045    0.132524    11.00000    0.03798    0.04321 =
         0.04823    0.00484   -0.00426    0.00252
AFIX  43
H2    2    0.198314    0.809847    0.144802    11.00000   -1.20000
AFIX   0
C3    1    0.162713    0.526414    0.253597    11.00000    0.04923    0.05062 =
         0.04338    0.00574   -0.00729   -0.01219
AFIX  23
H3A   2    0.147995    0.437332    0.225435    11.00000   -1.20000
H3B   2    0.064643    0.577742    0.250451    11.00000   -1.20000
AFIX   0
C4    1    0.201881    0.493130    0.378770    11.00000    0.03496    0.04025 =
         0.04010   -0.00135   -0.00280    0.00151
C5    1    0.274664    0.592189    0.432762    11.00000    0.04193    0.03772 =
         0.04509   -0.00115   -0.00188   -0.00331
AFIX  43
H5    2    0.304032    0.680982    0.390387    11.00000   -1.20000
AFIX   0
C6    1    0.303527    0.559639    0.548576    11.00000    0.03627    0.04021 =
         0.04771   -0.00923   -0.00340    0.00142
C7    1    0.260627    0.426023    0.611522    11.00000    0.04194    0.04495 =
         0.03907   -0.00588   -0.00736    0.00338
AFIX  43
H7    2    0.281072    0.403185    0.689201    11.00000   -1.20000
AFIX   0
C8    1    0.187685    0.327010    0.559027    11.00000    0.03600    0.03623 =
         0.03903   -0.00206   -0.00251    0.00324
C9    1    0.159195    0.362086    0.442729    11.00000    0.03704    0.03608 =
         0.04210   -0.00544   -0.00630    0.00178
AFIX  43
H9    2    0.110306    0.295770    0.407293    11.00000   -1.20000
AFIX   0
C10   1    0.381309    0.668977    0.606500    11.00000    0.04302    0.04919 =
         0.05860   -0.01274   -0.00639   -0.00292
AFIX  23
H10A  2    0.473254    0.627196    0.641159    11.00000   -1.20000
H10B  2    0.414690    0.750435    0.548333    11.00000   -1.20000
AFIX   0
C11   1    0.076127    0.803832    0.769724    11.00000    0.04998    0.05574 =
         0.08204   -0.02411   -0.00563   -0.00035
AFIX  43
H11   2   -0.016919    0.853309    0.778111    11.00000   -1.20000
AFIX   0
C12   1    0.269798    0.682320    0.810309    11.00000    0.07885    0.06559 =
         0.05353   -0.00852   -0.01736    0.01339
AFIX  43
H12   2    0.345082    0.627933    0.849897    11.00000   -1.20000
AFIX   0
C13   1    0.136067    0.179551    0.619013    11.00000    0.05966    0.04523 =
         0.03953    0.00252   -0.01346   -0.00650
AFIX  23
H13A  2    0.023254    0.173376    0.620592    11.00000   -1.20000
H13B  2    0.179963    0.110085    0.573359    11.00000   -1.20000
AFIX   0
C14   1    0.166029    0.115346    0.917987    11.00000    0.03958    0.08282 =
         0.03970   -0.00124   -0.00234    0.01116
AFIX  43
H14   2    0.129164    0.117393    0.994726    11.00000   -1.20000
AFIX   0
C15   1    0.310563    0.080045    0.774210    11.00000    0.03635    0.04543 =
         0.04484   -0.00142   -0.00178    0.00349
AFIX  43
H15   2    0.393277    0.053456    0.725906    11.00000   -1.20000
AFIX   0
C16   1    0.334628    1.052178    0.238455    11.00000    0.04259    0.04361 =
         0.05321   -0.00821   -0.00337    0.01111
HKLF 4


REM  fe(1-ttmb)(ncs)_a.res in P-1
REM R1 =  0.0383 for    3006 Fo > 4sig(Fo)  and  0.0418 for all    3321 data
REM    250 parameters refined using      0 restraints

END

WGHT      0.0594      0.0930

REM Highest difference peak  0.301,  deepest hole -0.417,  1-sigma level  0.046
Q1    1   0.4866  0.9150 -0.0390  11.00000  0.05    0.30
Q2    1   0.3419  1.0864  0.3555  11.00000  0.05    0.29
Q3    1   0.4607  0.8844  0.0423  11.00000  0.05    0.29
Q4    1   0.2972  0.5818  0.4960  11.00000  0.05    0.21
Q5    1   0.1091  0.6790  0.9335  11.00000  0.05    0.19
;
_shelx_res_checksum                59759
_shelx_hkl_file
;
   0   0   1  114.23    4.95
   0   0   2   88.45    4.16
   0   0  -3    8.66    1.40
   0   0  -4 1231.90   52.53
   0   0  -5 1148.44   49.63
   0   0  -6   40.10    2.51
   0   0  -6   42.94    2.53
   0   0  -7  145.82    7.09
   0   0  -7  148.35    9.35
   0   0  -7  155.36    7.16
   0   0  -8  340.00   16.08
   0   0  -8  342.40   15.33
   0   0  -8  343.41   15.36
   0   0  -8  333.17   18.09
   0   0  -8  339.64   15.27
   0   0  -8  364.59   16.00
   0   0  -9    3.42    1.65
   0   0  -9    1.51    2.03
   0   0  -9    0.60    1.57
   0   0  -9    1.97    2.21
   0   0 -10    2.64    2.40
   0   0 -10    3.08    1.73
   0   0 -10    0.61    2.28
   0   0 -10    5.45    1.94
   0   0 -10    3.98    1.86
   0   0 -11   88.67    5.23
   0   0 -11   82.31    6.07
   0   0 -11   87.91    5.08
   0   0 -12    0.78    1.29
   0   0 -12    2.70    2.18
   0   0 -13  108.80    5.52
   0   0 -13  111.26    5.62
   0   1 -13   20.43    1.85
   0   1 -12    3.86    1.70
   0   1 -12    1.79    1.51
   0   1 -11   64.15    4.03
   0   1 -11   60.25    4.73
   0   1 -11   60.82    4.62
   0   1 -11   62.72    4.16
   0   1 -10  227.97   10.45
   0   1 -10  204.58   11.20
   0   1 -10  226.73   11.22
   0   1 -10  210.35   10.59
   0  -1   9   32.17    2.74
   0   1  -9   34.22    2.85
   0   1  -9   32.99    3.43
   0   1  -9   30.01    3.35
   0   1  -9   35.02    3.03
   0   1  -8  430.49   19.23
   0   1  -8  421.24   18.49
   0   1  -8  416.73   19.26
   0   1  -7    5.05    1.29
   0   1  -7    3.67    1.90
   0   1  -6    3.77    1.10
   0   1  -6    5.01    1.80
   0   1  -6    4.06    1.09
   0   1  -5   52.17    3.89
   0   1  -4    1.64    1.08
   0  -1   3   12.29    1.52
   0  -1   2 1429.81   58.11
   0  -1   2 1340.75   58.56
   0  -1   1 1083.33   44.92
   0  -1   1 1071.07   44.89
   0  -1   0  259.53   11.25
   0  -1  -1 1873.02   77.82
   0  -1  -1 1874.75   77.33
   0  -1  -2  364.16   15.39
   0  -1  -2  349.48   15.98
   0  -1  -3 2690.06  112.34
   0   1   4   51.24    2.60
   0  -1  -4   74.85    4.57
   0  -1  -5  238.66   12.41
   0  -1  -6  145.65    6.95
   0  -1  -6  153.15    6.91
   0  -1  -6  165.82    9.50
   0  -1  -7  220.36    9.96
   0  -1  -7  217.00   12.72
   0  -1  -7  217.93    9.87
   0  -1  -8  697.86   29.69
   0  -1  -8  664.04   30.54
   0  -1  -8  717.91   30.41
   0  -1  -8  707.68   29.72
   0  -1  -8  694.01   33.35
   0  -1  -8  686.15   29.75
   0  -1  -9   12.23    2.58
   0  -1  -9    9.21    2.39
   0  -1  -9   13.37    1.91
   0  -1  -9   12.52    2.06
   0  -1  -9   17.76    3.86
   0  -1 -10    4.51    2.03
   0  -1 -10    2.26    1.85
   0  -1 -10    1.55    1.60
   0  -1 -10    2.23    2.36
   0  -1 -11    1.32    1.41
   0  -1 -11    2.46    1.53
   0  -1 -11    1.71    2.02
   0  -1 -11    5.04    2.79
   0  -1 -12    5.79    1.94
   0  -1 -12    7.73    2.68
   0  -1 -12    8.80    2.16
   0  -1 -13   36.03    2.72
   0  -1 -13   33.15    2.55
   0   2 -13   21.25    1.60
   0   2 -13   20.12    1.70
   0   2 -11   37.40    3.39
   0   2 -11   26.94    2.54
   0   2 -10   72.63    5.13
   0   2 -10   70.03    4.93
   0   2 -10   78.66    4.47
   0  -2  10   67.33    4.51
   0   2  -9   42.11    3.38
   0   2  -9   34.28    3.65
   0   2  -9   44.34    3.65
   0   2  -9   43.12    3.16
   0  -2   9   36.31    3.20
   0   2  -8  815.03   33.84
   0   2  -8  757.24   34.19
   0   2  -8  793.98   34.34
   0   2  -8  810.47   33.55
   0  -2   8  750.56   33.91
   0   2  -7   57.13    3.40
   0   2  -7   60.30    3.63
   0   2  -6    9.81    1.33
   0   2  -6    8.31    1.30
   0  -2   6    8.84    1.51
   0   2  -5  412.27   18.60
   0   2  -5  410.80   17.62
   0  -2   5  448.93   17.93
   0   2  -5  386.20   17.50
   0  -2   4   25.21    2.75
   0  -2   3  332.83   14.59
   0  -2   3  311.02   15.09
   0  -2   2  379.58   16.42
   0  -2   2  357.00   16.64
   0  -2   1   71.71    4.22
   0  -2   1   79.67    4.33
   0  -2   0  583.83   23.48
   0  -2   0  506.24   23.17
   0  -2  -1   30.85    2.50
   0  -2  -1   30.83    2.00
   0  -2  -1   28.97    2.42
   0  -2  -2  255.60   11.71
   0  -2  -2  238.80   11.86
   0  -2  -2  268.97   11.74
   0  -2  -3  564.21   23.89
   0  -2  -3  524.67   24.62
   0  -2  -4  128.60    7.66
   0  -2  -5 1262.27   55.20
   0  -2  -6    3.10    1.08
   0  -2  -6    6.55    2.55
   0  -2  -7    3.24    2.57
   0  -2  -7    3.41    0.96
   0  -2  -7    3.67    1.29
   0  -2  -7    2.53    0.95
   0  -2  -8  625.93   26.36
   0  -2  -8  621.93   27.08
   0  -2  -8  616.51   26.37
   0  -2  -8  618.42   26.57
   0  -2  -8  625.12   30.80
   0  -2  -8  599.25   26.68
   0  -2  -9    1.35    1.38
   0  -2  -9   -0.23    2.09
   0  -2  -9    0.96    1.27
   0  -2  -9    1.50    1.67
   0  -2  -9    0.61    3.05
   0  -2 -10    3.78    2.47
   0  -2 -10    2.44    1.47
   0  -2 -10    0.55    1.21
   0  -2 -10    4.90    2.28
   0  -2 -10    3.25    1.54
   0  -2 -10   -2.59    3.34
   0  -2 -11  123.22    6.83
   0  -2 -11  137.90    7.56
   0  -2 -11  127.80    7.93
   0  -2 -11  120.30    6.96
   0  -2 -12    1.95    1.70
   0  -2 -12   -0.72    1.85
   0  -2 -12    0.47    2.43
   0  -2 -12    0.15    1.84
   0  -2 -13   35.91    2.89
   0  -2 -13   35.08    2.60
   0  -2 -13   39.07    2.80
   0   3 -12    7.75    1.57
   0   3 -11   24.28    2.58
   0   3 -11   20.57    2.11
   0   3 -11   25.11    2.74
   0   3 -10   55.98    4.22
   0   3 -10   61.90    3.78
   0  -3  10   54.46    4.05
   0   3 -10   68.85    4.68
   0   3  -9  142.22    7.51
   0  -3   9  148.98    7.80
   0   3  -9  138.08    7.13
   0   3  -9  144.00    8.00
   0   3  -8    8.54    1.75
   0   3  -8    7.46    2.31
   0   3  -8    7.70    1.95
   0  -3   8   11.52    2.24
   0   3  -7   91.15    4.74
   0  -3   7   84.55    5.29
   0   3  -6   82.14    4.53
   0   3  -6   86.18    4.42
   0   3  -5  330.15   14.33
   0   3  -5  351.42   14.44
   0   3  -4   10.10    1.16
   0  -3   4   12.28    1.53
   0  -3   3  295.45   14.63
   0  -3   3  301.84   14.24
   0  -3   2  648.25   28.95
   0  -3   2  658.78   28.81
   0  -3   1 1155.75   49.43
   0  -3   0  415.89   18.56
   0  -3   0  446.47   18.96
   0  -3   0  383.32   18.80
   0  -3  -1 1003.73   42.74
   0  -3  -1 1036.27   43.59
   0  -3  -1  993.07   43.34
   0  -3  -2 1049.80   46.36
   0  -3  -2 1054.75   45.99
   0  -3  -2 1104.47   46.00
   0  -3  -3   21.56    2.47
   0  -3  -4    4.98    1.96
   0  -3  -4    3.85    1.51
   0  -3  -5  223.47   12.74
   0  -3  -6   44.48    5.23
   0  -3  -7   42.12    5.37
   0  -3  -8   34.47    2.61
   0  -3  -8   36.63    3.37
   0  -3  -8   32.82    2.87
   0  -3  -8   30.48    3.08
   0  -3  -8   43.42    3.34
   0  -3  -8   21.96    4.85
   0  -3  -8   31.44    2.78
   0  -3  -9    0.21    1.89
   0  -3  -9    1.76    1.65
   0  -3  -9    2.74    2.35
   0  -3  -9    2.10    1.67
   0  -3  -9    1.25    1.53
   0  -3  -9    1.21    1.80
   0  -3  -9    0.85    1.27
   0  -3  -9    4.79    3.75
   0  -3 -10   98.19    5.69
   0  -3 -10   99.34    6.33
   0  -3 -10  104.91    5.97
   0  -3 -10   86.23    5.49
   0  -3 -10   95.03    5.21
   0  -3 -10   98.90    9.46
   0  -3 -11   55.56    4.53
   0  -3 -11   54.45    3.85
   0  -3 -11   49.95    4.00
   0  -3 -11   50.09    3.65
   0  -3 -12    1.35    2.06
   0  -3 -12    6.26    1.78
   0  -3 -12    6.28    2.00
   0  -3 -13   51.35    3.63
   0  -3 -13   46.88    3.08
   0  -3 -13   52.49    3.31
   0   4 -12   31.68    2.29
   0   4 -11    1.72    1.55
   0  -4  11    1.81    1.36
   0   4 -11    3.51    1.52
   0   4 -10    3.45    1.50
   0   4 -10    2.01    2.06
   0  -4  10    2.04    1.75
   0   4 -10    4.78    1.95
   0   4  -9   18.52    2.15
   0   4  -9   19.82    2.98
   0  -4   9   18.33    2.83
   0   4  -9   15.75    2.44
   0   4  -8 1003.68   42.21
   0   4  -8 1005.58   42.80
   0   4  -8  979.84   41.80
   0  -4   8  965.01   42.63
   0   4  -7    1.54    1.57
   0  -4   7    0.53    1.99
   0   4  -7    2.66    1.40
   0   4  -7    2.93    1.40
   0   4  -6  298.38   12.95
   0  -4   6  275.35   13.57
   0   4  -5   14.57    1.55
   0   4  -5   12.53    2.17
   0  -4   5   13.68    2.05
   0  -4   4  133.74    6.63
   0  -4   3  891.78   37.70
   0  -4   2   85.45    4.44
   0  -4   2   83.00    4.45
   0  -4   2   88.70    5.88
   0  -4   1 1007.69   43.33
   0  -4   1  969.76   43.03
   0  -4   0  215.42   11.36
   0  -4   0  226.51   11.33
   0  -4   0  203.40   10.76
   0  -4  -1  287.08   14.31
   0  -4  -1  288.91   14.25
   0  -4  -1  283.02   13.49
   0  -4  -2   14.45    2.59
   0  -4  -2   12.93    2.49
   0  -4  -2   17.13    2.63
   0  -4  -3  622.61   28.64
   0  -4  -3  606.11   27.89
   0  -4  -3  607.25   27.86
   0  -4  -4    7.39    2.20
   0  -4  -5  360.18   19.14
   0  -4  -6   49.49    5.99
   0  -4  -7   15.22    2.26
   0  -4  -7   15.91    1.91
   0  -4  -7   17.33    2.14
   0  -4  -7   19.48    2.17
   0  -4  -7   16.28    4.19
   0  -4  -7   16.75    2.38
   0  -4  -7   16.45    2.21
   0  -4  -7   17.96    2.08
   0  -4  -8   13.48    2.38
   0  -4  -8   17.70    2.34
   0  -4  -8   15.40    1.98
   0  -4  -8   15.49    2.18
   0  -4  -8   18.02    2.33
   0  -4  -8   10.97    4.06
   0  -4  -8   17.25    2.71
   0  -4  -8   14.69    2.49
   0  -4  -8   16.81    2.15
   0  -4  -9    0.91    2.23
   0  -4  -9   -1.12    1.71
   0  -4  -9    1.60    1.55
   0  -4  -9    0.76    3.70
   0  -4  -9    0.22    1.93
   0  -4  -9    0.61    2.20
   0  -4  -9    1.04    1.76
   0  -4  -9    2.32    1.78
   0  -4  -9    1.10    2.16
   0  -4  -9    1.64    1.74
   0  -4 -10  124.99    7.60
   0  -4 -10  122.12    6.92
   0  -4 -10  125.20    6.95
   0  -4 -10  117.63    6.38
   0  -4 -10  124.66    6.75
   0  -4 -10  122.66    7.40
   0  -4 -11    4.60    2.66
   0  -4 -11    4.17    2.07
   0  -4 -11    2.17    1.81
   0  -4 -11    1.68    1.36
   0  -4 -11    1.35    2.45
   0  -4 -11    3.26    1.93
   0  -4 -12    1.49    2.31
   0  -4 -12    4.31    1.83
   0  -4 -12    0.58    1.50
   0  -4 -12    0.39    2.09
   0  -4 -13   29.88    2.32
   0  -4 -13   24.40    2.01
   0  -4 -13   22.88    2.57
   0  -5  11   14.18    1.70
   0   5 -11   14.91    1.63
   0   5 -10    3.75    1.49
   0  -5  10    3.02    1.79
   0   5 -10    5.11    1.87
   0   5  -9    0.27    1.67
   0   5  -9    0.87    2.14
   0  -5   9    0.89    2.02
   0   5  -9    0.28    1.31
   0   5  -8   29.44    2.79
   0   5  -8   27.42    2.39
   0  -5   8   31.23    3.44
   0   5  -7   21.49    2.47
   0   5  -7   23.36    2.29
   0  -5   7   20.13    2.83
   0   5  -7   23.11    2.27
   0  -5   6  115.79    6.78
   0   5  -6  118.61    5.97
   0   5  -6  117.05    6.14
   0   5  -5  429.71   18.36
   0  -5   5  422.30   19.11
   0   5  -5  412.41   18.45
   0   5  -4    4.54    1.19
   0  -5   3  139.80    7.02
   0  -5   3  132.57    6.58
   0  -5   3  138.98    6.96
   0  -5   2  106.86    5.65
   0  -5   2  102.86    5.43
   0  -5   2  114.63    5.74
   0  -5   1   15.80    1.60
   0  -5   1   17.32    1.76
   0  -5   1   13.93    2.98
   0  -5   1   16.35    3.52
   0  -5   1   17.35    1.81
   0  -5   0  387.43   16.30
   0  -5   0  374.52   18.75
   0  -5   0  352.38   18.59
   0  -5   0  359.71   16.34
   0  -5  -1   35.20    2.43
   0  -5  -1   30.62    4.03
   0  -5  -1   30.49    3.99
   0  -5  -1   38.00    2.53
   0  -5  -2  367.64   16.22
   0  -5  -2  380.64   18.52
   0  -5  -3  486.02   21.59
   0  -5  -3  545.02   24.32
   0  -5  -3  517.65   24.35
   0  -5  -4    0.87    1.10
   0  -5  -4    0.96    2.47
   0  -5  -5  275.75   12.38
   0  -5  -6  149.43    7.52
   0  -5  -6  147.04    7.71
   0  -5  -6  152.02    7.46
   0  -5  -6  155.22    7.74
   0  -5  -6  149.93    7.87
   0  -5  -6  146.02    7.41
   0  -5  -6  151.13    7.77
   0  -5  -6  145.84    7.13
   0  -5  -7   38.88    3.26
   0  -5  -7   34.17    3.16
   0  -5  -7   37.23    2.96
   0  -5  -7   38.62    3.17
   0  -5  -7   38.38    3.35
   0  -5  -7   42.87    3.11
   0  -5  -7   44.83    6.32
   0  -5  -7   41.10    3.60
   0  -5  -7   41.29    3.54
   0  -5  -8   26.95    3.13
   0  -5  -8   27.58    2.87
   0  -5  -8   27.19    2.69
   0  -5  -8   33.97    3.22
   0  -5  -8   35.31    3.11
   0  -5  -8   28.44    3.27
   0  -5  -8   24.52    2.62
   0  -5  -8   27.71    2.74
   0  -5  -8   31.71    3.41
   0  -5  -8   25.71    3.26
   0  -5  -8   37.81    6.68
   0  -5  -9   -1.05    2.26
   0  -5  -9    0.95    2.11
   0  -5  -9    2.08    2.08
   0  -5  -9    0.33    1.92
   0  -5  -9   -0.49    1.67
   0  -5  -9    0.90    1.51
   0  -5  -9    2.41    2.13
   0  -5  -9    0.30    1.74
   0  -5  -9    3.18    1.73
   0  -5 -10   46.15    3.31
   0  -5 -10   36.88    3.98
   0  -5 -10   40.92    3.36
   0  -5 -10   34.37    3.71
   0  -5 -10   41.30    3.60
   0  -5 -10   46.05    3.80
   0  -5 -11   92.96    6.20
   0  -5 -11   93.33    5.68
   0  -5 -11  101.05    5.69
   0  -5 -11   98.62    6.39
   0  -5 -11   94.51    5.42
   0  -5 -12    2.67    1.54
   0  -5 -12   -0.12    1.58
   0  -5 -12    0.18    2.10
   0  -5 -12    3.63    1.47
   0  -5 -13   12.27    1.61
   0  -6  10   34.96    2.72
   0   6 -10   31.39    2.38
   0  -6   9    7.78    2.12
   0   6  -9    2.49    1.88
   0  -6   8   46.90    3.89
   0   6  -8   40.81    3.08
   0   6  -8   46.36    3.97
   0  -6   7   47.44    4.25
   0   6  -7   56.93    3.28
   0   6  -7   40.87    3.23
   0   6  -7   50.37    3.38
   0   6  -6    9.11    1.71
   0   6  -6   10.02    1.77
   0  -6   6    8.63    2.46
   0   6  -5  357.50   16.54
   0   6  -5  396.03   16.62
   0  -6   4   14.83    1.81
   0  -6   4   12.46    2.38
   0  -6   3  194.48    9.83
   0  -6   3  199.28    9.44
   0  -6   3  221.69   13.69
   0  -6   3  196.27    9.50
   0  -6   2   13.55    4.01
   0  -6   2   10.54    1.69
   0  -6   2   10.16    1.65
   0  -6   2    8.43    1.81
   0  -6   1    7.92    3.70
   0  -6   1    7.40    1.54
   0  -6   1    7.79    1.52
   0  -6   1    7.78    1.68
   0  -6   0  153.21    9.99
   0  -6   0  138.59    7.09
   0  -6   0  142.80    7.04
   0  -6  -1  129.09    5.54
   0  -6  -1  125.09    8.54
   0  -6  -1  139.55    8.63
   0  -6  -2  175.23   11.04
   0  -6  -3  844.59   36.64
   0  -6  -3  852.05   36.95
   0  -6  -3  942.65   40.09
   0  -6  -3  858.24   36.74
   0  -6  -3  886.10   36.72
   0  -6  -3  844.56   36.29
   0  -6  -4   23.23    2.27
   0  -6  -4   16.58    1.97
   0  -6  -4   20.21    2.21
   0  -6  -4   19.17    2.40
   0  -6  -4   20.49    2.13
   0  -6  -4   19.75    2.10
   0  -6  -5  194.02    9.52
   0  -6  -5  191.45    9.18
   0  -6  -5  195.77    9.25
   0  -6  -5  180.79    9.34
   0  -6  -5  185.73    9.59
   0  -6  -5  192.85    9.51
   0  -6  -5  195.47    9.23
   0  -6  -6    3.60    1.75
   0  -6  -6    3.23    1.75
   0  -6  -6    1.67    1.66
   0  -6  -6    3.40    1.42
   0  -6  -6    4.50    1.36
   0  -6  -6    2.86    2.06
   0  -6  -6    3.95    1.75
   0  -6  -6    0.40    1.53
   0  -6  -6    2.94    1.71
   0  -6  -7    4.76    1.95
   0  -6  -7    3.90    2.24
   0  -6  -7    3.74    2.19
   0  -6  -7    6.52    1.90
   0  -6  -7    3.90    2.00
   0  -6  -7    1.86    1.73
   0  -6  -7    4.15    1.95
   0  -6  -7    3.90    2.20
   0  -6  -7    5.81    2.04
   0  -6  -8   67.64    4.73
   0  -6  -8   73.49    5.29
   0  -6  -8   73.11    4.91
   0  -6  -8   71.16    4.85
   0  -6  -8   78.00    4.74
   0  -6  -8   77.44    5.28
   0  -6  -8   71.68    5.09
   0  -6  -8   78.85    4.95
   0  -6  -9  103.80    6.20
   0  -6  -9  112.58    6.86
   0  -6  -9  108.43    6.51
   0  -6  -9  109.24    6.30
   0  -6  -9  115.89    6.24
   0  -6  -9  110.76    6.92
   0  -6  -9  119.26    6.54
   0  -6 -10    4.67    2.30
   0  -6 -10    2.32    1.99
   0  -6 -10    3.94    2.35
   0  -6 -10    5.23    1.87
   0  -6 -10    7.50    2.25
   0  -6 -10    2.55    2.06
   0  -6 -11  168.80    8.55
   0  -6 -11  171.89    9.07
   0  -6 -11  196.10    9.05
   0  -6 -11  189.65    8.79
   0  -6 -12    2.71    1.44
   0  -6 -12    2.25    1.26
   0  -7   9    7.44    1.27
   0   7  -9    7.40    1.42
   0  -7   9   10.86    1.75
   0   7  -8   27.98    2.76
   0  -7   8   23.06    2.75
   0  -7   7   80.42    5.37
   0  -7   6  141.44   11.62
   0  -7   5   86.51    8.92
   0   7  -5   84.22    4.49
   0  -7   5   71.71    5.32
   0  -7   4    4.46    2.24
   0  -7   4    0.66    3.80
   0  -7   3   60.29    3.96
   0  -7   3   57.99    4.04
   0  -7   3   67.75    7.51
   0  -7   3   56.74    4.28
   0  -7   2   19.18    2.32
   0  -7   2   13.15    2.18
   0  -7   2   20.86    4.73
   0  -7   2   18.53    2.50
   0  -7   1   11.22    2.07
   0  -7   1    7.50    1.88
   0  -7   1    6.11    3.79
   0  -7   1   10.13    1.97
   0  -7   0   61.70    3.89
   0  -7   0   62.17    3.95
   0  -7   0   69.05    6.97
   0  -7  -1   25.08    4.96
   0  -7  -1   30.27    2.86
   0  -7  -1   29.55    2.62
   0  -7  -1   25.41    2.67
   0  -7  -2   76.79    4.41
   0  -7  -2   72.97    4.60
   0  -7  -2   79.62    4.99
   0  -7  -2   75.14    7.26
   0  -7  -3  211.04   12.70
   0  -7  -3  177.61    9.19
   0  -7  -3  173.75    8.63
   0  -7  -3  181.41    9.13
   0  -7  -3  186.19    9.49
   0  -7  -3  184.61    9.01
   0  -7  -3  194.74    9.20
   0  -7  -4   35.61    3.12
   0  -7  -4   44.96    3.33
   0  -7  -4   37.24    3.23
   0  -7  -4   37.84    3.24
   0  -7  -4   42.65    3.63
   0  -7  -4   40.64    3.22
   0  -7  -5   41.14    3.55
   0  -7  -5   44.12    3.36
   0  -7  -5   43.40    3.43
   0  -7  -5   38.72    3.59
   0  -7  -5   50.28    3.51
   0  -7  -5   46.64    3.46
   0  -7  -5   40.05    3.29
   0  -7  -5   43.46    3.83
   0  -7  -5   44.09    3.59
   0  -7  -6    7.59    2.28
   0  -7  -6    4.96    2.15
   0  -7  -6    6.17    1.78
   0  -7  -6    7.96    2.20
   0  -7  -6    7.19    1.83
   0  -7  -6    8.79    2.14
   0  -7  -6   12.40    2.18
   0  -7  -7   78.57    5.29
   0  -7  -7   86.54    5.03
   0  -7  -7   85.00    5.43
   0  -7  -7   73.35    4.56
   0  -7  -7   74.83    5.13
   0  -7  -7   82.01    5.62
   0  -7  -7   83.92    5.45
   0  -7  -8   71.84    4.63
   0  -7  -8   64.07    4.59
   0  -7  -8   73.41    5.05
   0  -7  -8   75.29    4.57
   0  -7  -8   67.31    4.77
   0  -7  -8   67.38    5.15
   0  -7  -8   69.05    4.91
   0  -7  -9    0.61    2.22
   0  -7  -9    0.60    1.64
   0  -7  -9    4.16    1.81
   0  -7  -9    0.14    1.75
   0  -7  -9    2.84    2.24
   0  -7  -9    0.19    2.09
   0  -7  -9   -0.17    1.81
   0  -7 -10   19.98    2.33
   0  -7 -10   23.05    2.94
   0  -7 -10   26.06    2.91
   0  -7 -10   21.75    2.34
   0  -7 -11   19.99    2.41
   0  -7 -11   19.63    2.53
   0  -7 -11   16.61    1.97
   0  -7 -12    0.09    1.22
   0  -8   8    4.54    1.18
   0   8  -8    4.76    1.13
   0   8  -7    6.54    1.75
   0  -8   6   21.85    2.85
   0   8  -6   21.52    2.27
   0  -8   5   72.76    5.02
   0  -8   4   77.15    8.35
   0  -8   4   79.53    5.32
   0   8  -3   38.35    5.90
   0  -8   3   58.17    7.31
   0  -8   3   44.78    3.63
   0  -8   3   51.88    4.08
   0  -8   2  105.41    9.75
   0  -8   2  107.26    6.15
   0  -8   2   95.65    6.14
   0  -8   2  110.77    6.14
   0  -8   1    7.82    2.15
   0  -8   1   16.41    2.42
   0  -8   1   10.24    2.22
   0  -8   1   13.04    4.65
   0  -8   0    1.74    1.74
   0  -8   0    0.60    3.62
   0  -8   0    4.46    2.14
   0  -8   0    3.42    1.93
   0  -8  -1   16.18    2.39
   0  -8  -1   19.94    2.83
   0  -8  -1   17.47    2.72
   0  -8  -1   15.79    2.55
   0  -8  -1   15.25    4.50
   0  -8  -2    1.16    3.43
   0  -8  -2    1.21    2.08
   0  -8  -2    3.01    1.75
   0  -8  -2    5.06    2.16
   0  -8  -2    3.74    1.97
   0  -8  -3   98.18    6.09
   0  -8  -3  102.37    5.46
   0  -8  -3   96.53    6.00
   0  -8  -3  109.89    6.40
   0  -8  -3  103.08    5.95
   0  -8  -4   32.25    3.06
   0  -8  -4   35.27    3.23
   0  -8  -4   39.02    3.38
   0  -8  -4   38.39    3.70
   0  -8  -4   31.73    3.32
   0  -8  -5    4.74    2.34
   0  -8  -5    0.67    1.81
   0  -8  -5    2.07    1.87
   0  -8  -5    4.62    2.06
   0  -8  -5    2.33    1.82
   0  -8  -5    2.15    2.38
   0  -8  -5    2.03    1.92
   0  -8  -5    0.78    2.05
   0  -8  -6   49.28    3.81
   0  -8  -6   33.25    3.94
   0  -8  -6   41.75    3.44
   0  -8  -6   48.34    3.65
   0  -8  -6   40.75    3.75
   0   8   6   43.84    6.16
   0  -8  -7   13.36    2.49
   0  -8  -7   18.54    2.48
   0  -8  -7   18.70    2.75
   0  -8  -8   70.68    4.34
   0  -8  -8   65.45    4.58
   0  -8  -8   69.32    4.23
   0  -8  -8   58.29    4.71
   0  -8  -8   66.87    4.69
   0  -8  -9    1.19    1.56
   0  -8  -9    2.43    1.67
   0  -8  -9    2.77    1.84
   0  -8  -9    2.85    2.18
   0  -8  -9    3.80    2.14
   0  -8 -10    3.27    1.37
   0  -8 -10    1.74    1.73
   0  -8 -10    3.49    1.82
   0  -8 -10    4.96    1.50
   0  -8 -11   31.09    2.15
   0  -9   6   17.02    1.91
   0  -9   5   25.79    2.54
   0  -9   4    2.83    1.54
   0  -9   3  143.03    7.49
   0  -9   2   40.41    3.46
   0  -9   1    1.56    1.94
   0  -9   1    1.64    2.05
   0   9  -1   -2.04    3.33
   0  -9   1    3.31    2.07
   0  -9   1    2.40    3.41
   0  -9   0   52.13    4.00
   0  -9   0   48.65    6.42
   0  -9   0   54.27    4.17
   0  -9   0   57.42    4.29
   0  -9   0   40.96    3.65
   0  -9  -1   17.68    2.37
   0  -9  -1   14.79    2.81
   0  -9  -1   18.57    4.75
   0  -9  -1   17.79    2.47
   0  -9  -1   18.86    2.78
   0  -9  -1   18.72    2.87
   0  -9  -2  268.00   12.93
   0  -9  -2  247.01   12.00
   0  -9  -2  264.19   12.70
   0  -9  -2  278.78   12.83
   0  -9  -2  248.12   12.58
   0  -9  -3    1.59    1.35
   0  -9  -3    2.51    2.29
   0  -9  -3    1.94    2.21
   0  -9  -4   23.64    3.06
   0  -9  -4   19.04    2.67
   0  -9  -4   14.01    2.78
   0  -9  -4   20.87    3.16
   0  -9  -4   17.32    2.78
   0  -9  -5    9.16    2.24
   0  -9  -5   15.94    2.42
   0  -9  -5   11.19    2.43
   0  -9  -5   11.90    2.76
   0  -9  -5    8.07    1.93
   0  -9  -5    9.63    2.55
   0  -9  -6    7.96    2.05
   0  -9  -6    4.99    2.12
   0  -9  -6    4.45    2.49
   0  -9  -6    8.56    2.37
   0  -9  -6    5.74    1.98
   0  -9  -7   -0.30    1.72
   0  -9  -7    3.06    1.86
   0  -9  -8    4.58    1.75
   0  -9  -8    4.53    1.96
   0  -9  -8    2.28    1.76
   0  -9  -9    6.66    2.01
   0  -9  -9    6.63    1.72
   0  -9  -9    6.03    1.52
   0  -9  -9    6.93    1.79
   0  -9 -10    0.75    0.92
   0  10  -4    0.71    1.14
   0 -10   4    0.67    1.20
   0 -10   3   13.26    1.63
   0 -10   3   18.98    2.02
   0 -10   2   10.18    1.83
   0 -10   2    9.33    1.83
   0 -10   1    4.20    1.84
   0 -10   1    0.37    1.56
   0 -10   0   15.11    2.42
   0 -10   0   15.59    2.09
   0 -10  -1    1.04    1.52
   0 -10  -1    0.17    1.87
   0 -10  -1   -0.45    1.42
   0 -10  -2    2.56    1.80
   0 -10  -2    3.90    2.13
   0 -10  -3  126.98    7.12
   0 -10  -3  129.67    6.98
   0 -10  -3  120.69    7.15
   0 -10  -4    9.84    2.21
   0 -10  -4   11.46    2.37
   0 -10  -4    9.29    2.41
   0 -10  -5   74.48    4.76
   0 -10  -5   80.73    5.09
   0 -10  -5   76.74    5.05
   0 -10  -6    2.01    1.97
   0 -10  -6    1.31    1.63
   0 -10  -6    1.60    2.02
   0 -10  -7    6.53    2.00
   0 -10  -8    5.71    1.60
   0 -11   1   10.92    1.26
   0 -11   0    7.11    1.38
   0 -11  -1   -0.12    1.58
   0 -11  -1    0.54    1.34
   0 -11  -2    7.99    1.77
   0 -11  -2    3.62    1.58
   0 -11  -3    5.02    1.62
   0 -11  -3    4.13    1.32
   0 -11  -3    2.06    1.55
   0 -11  -4    4.45    1.56
   0 -11  -4    1.27    1.27
   0 -11  -4    1.91    1.53
   0 -11  -5   11.98    1.72
   0 -11  -5    9.21    1.72
   1 -11  -5    7.73    1.51
   1 -11  -5    6.26    1.58
   1 -11  -4    9.22    1.62
   1 -11  -4    8.73    1.77
   1 -11  -3   -1.38    1.23
   1 -11  -3    0.87    1.68
   1 -11  -2    7.24    1.73
   1 -11  -2    5.75    1.57
   1 -11  -2    5.67    1.24
   1 -11  -1   13.03    1.94
   1 -11  -1   13.28    1.87
   1 -11   0   30.88    2.46
   1 -10  -8    1.39    1.39
   1 -10  -8    1.97    1.18
   1 -10  -8    2.58    1.34
   1 -10  -7   10.94    2.12
   1 -10  -7   16.17    1.87
   1 -10  -6    0.74    1.87
   1 -10  -6    1.41    1.45
   1 -10  -5   17.11    2.23
   1 -10  -5   15.18    2.61
   1 -10  -5   17.27    2.56
   1 -10  -4   45.67    3.58
   1 -10  -4   45.14    3.72
   1 -10  -4   47.83    3.52
   1 -10  -4   47.46    3.95
   1 -10  -3    9.32    2.18
   1 -10  -3    9.19    2.21
   1 -10  -3    8.73    2.55
   1 -10  -2  101.77    5.36
   1 -10  -2  110.86    6.09
   1 -10  -2   98.12    5.79
   1 -10  -2   96.11    6.09
   1 -10  -1    2.83    1.57
   1 -10  -1    3.84    1.97
   1 -10  -1    2.55    1.60
   1 -10  -1    1.06    2.07
   1 -10   0    6.24    1.77
   1 -10   0    3.69    2.00
   1 -10   0    3.05    1.90
   1 -10   1   14.73    2.09
   1 -10   1   15.88    2.39
   1 -10   1   17.49    2.33
   1 -10   2    1.93    1.52
   1 -10   2    0.95    1.68
   1 -10   3   25.04    2.32
   1 -10   3   27.95    2.37
  -1  10  -4    2.65    1.34
   1 -10   4    1.29    1.03
   1  -9  -9    7.29    1.76
   1  -9  -9    7.93    1.71
   1  -9  -9   10.56    1.82
   1  -9  -8   53.88    4.01
   1  -9  -8   62.34    3.98
   1  -9  -8   55.42    3.95
   1  -9  -7   33.80    3.39
   1  -9  -7   36.17    3.05
   1  -9  -7   34.50    3.32
   1  -9  -7   31.12    2.97
   1  -9  -6    2.39    1.66
   1  -9  -6    2.38    1.82
   1  -9  -6    1.54    1.96
   1  -9  -6    1.92    1.68
   1  -9  -5   53.36    4.22
   1  -9  -5   42.08    3.39
   1  -9  -5   44.28    3.58
   1  -9  -5   53.03    3.84
   1  -9  -5   45.01    3.64
   1  -9  -4  128.52    7.60
   1  -9  -4  118.17    7.09
   1  -9  -4  133.75    7.24
  -1   9   4  127.49   11.08
   1  -9  -4  136.01    7.14
   1  -9  -3   31.83    3.05
  -1   9   3   23.12    5.41
   1  -9  -3   29.80    2.63
   1  -9  -3   32.55    3.35
   1  -9  -3   32.07    3.62
  -1   9   2   18.90    5.01
   1  -9  -2   26.16    2.67
   1  -9  -2   25.40    3.26
   1  -9  -2   28.84    3.17
   1  -9  -1   54.23    3.86
   1  -9  -1   48.36    4.29
   1  -9  -1   56.44    4.30
   1  -9  -1   49.59    6.39
   1  -9   0   49.21    6.33
   1  -9   0   57.05    4.34
  -1   9   0   54.24    7.16
   1  -9   0   53.10    4.04
   1  -9   0   57.65    4.47
   1  -9   0   53.83    3.83
   1  -9   1  105.27    6.31
   1  -9   1  111.32    6.34
   1  -9   2   31.32    3.02
   1  -9   2   33.51    3.17
   1  -9   4   19.85    2.47
  -1   9  -5    8.01    1.77
   1  -9   5    5.43    1.75
   1  -9   6   21.01    2.06
   1  -8 -11    1.25    1.09
   1  -8 -11    2.57    1.34
   1  -8 -11    1.90    1.00
   1  -8 -10   57.43    3.78
   1  -8 -10   49.40    3.34
   1  -8 -10   52.13    3.59
   1  -8 -10   56.09    3.44
   1  -8  -9   37.92    3.23
   1  -8  -9   38.16    3.00
   1  -8  -9   26.91    3.08
   1  -8  -9   31.07    2.89
   1  -8  -8    1.22    2.02
   1  -8  -8    1.89    2.29
   1  -8  -8    1.23    2.03
   1  -8  -7   31.45    2.85
   1  -8  -7   29.45    3.06
   1  -8  -7   32.78    3.33
   1  -8  -7   30.76    3.46
   1  -8  -7   31.54    3.36
   1  -8  -6    1.50    1.72
   1  -8  -6   -1.08    1.96
   1  -8  -6    1.17    1.79
   1  -8  -6    0.85    1.84
  -1   8   6    0.63    3.12
   1  -8  -6    1.25    1.96
   1  -8  -6    1.27    2.34
   1  -8  -5   51.28    3.89
   1  -8  -5   57.59    4.10
   1  -8  -5   58.97    4.10
  -1   8   5   53.69    6.92
   1  -8  -5   51.54    4.05
   1  -8  -5   47.87    3.98
   1  -8  -4   67.06    4.63
   1  -8  -4   60.05    4.29
  -1   8   4   65.75    7.69
   1  -8  -4   68.23    4.53
   1  -8  -4   72.74    4.61
   1  -8  -3   40.05    3.64
   1  -8  -3   33.18    3.30
   1  -8  -3   32.18    2.90
   1  -8  -3   35.47    3.20
   1  -8  -2  207.35   10.14
   1  -8  -2  217.13   13.70
   1  -8  -2  194.79    9.92
   1  -8  -2  212.69   10.72
   1  -8  -1  127.01    7.19
   1  -8  -1  126.59    7.10
   1  -8  -1  128.89    6.96
   1  -8  -1  121.37   10.06
   1  -8  -1  126.22    6.84
   1  -8   0    9.37    2.26
   1  -8   0    5.11    3.77
   1  -8   0   10.61    2.34
   1  -8   1  206.41   10.45
   1  -8   1  241.31   14.40
   1  -8   1  209.83   10.60
  -1   8  -1  205.26   14.50
   1  -8   2    1.35    1.84
  -1   8  -2    0.65    2.94
   1  -8   2    0.59    3.49
   1  -8   3  185.56    9.36
   1  -8   3  196.05   13.24
  -1   8  -3  168.61   12.70
   1  -8   3  196.21    9.93
   1  -8   4    2.90    3.73
   1  -8   4    8.21    2.32
   1  -8   5   20.17    2.81
   1  -8   6  158.49    8.04
  -1   8  -6  160.26    7.95
   1  -8   7   24.19    2.30
   1  -8   8    9.03    1.27
  -1   8  -8    9.29    1.59
   1  -7 -12    1.41    1.15
   1  -7 -12   -0.14    0.96
   1  -7 -11    0.79    1.26
   1  -7 -11    0.80    1.38
   1  -7 -11   -0.65    1.64
   1  -7 -10   14.00    2.11
   1  -7 -10    9.29    2.16
   1  -7  -9   15.16    2.33
   1  -7  -9   13.41    2.53
   1  -7  -9   16.19    2.65
   1  -7  -8   12.74    2.05
   1  -7  -8   19.76    2.74
   1  -7  -8   19.35    2.89
   1  -7  -8   18.45    2.77
   1  -7  -8   17.09    2.86
   1  -7  -7   29.14    2.50
   1  -7  -7   24.03    2.74
   1  -7  -7   35.73    3.53
   1  -7  -7   37.11    3.42
   1  -7  -7   30.88    3.25
   1  -7  -6    4.47    1.89
   1  -7  -6    3.84    1.67
  -1   7   6    6.98    3.49
   1  -7  -6    2.68    2.16
   1  -7  -6    3.54    2.01
   1  -7  -6    2.93    1.85
   1  -7  -6    4.32    1.98
   1  -7  -5  133.86    7.28
   1  -7  -5  135.33    7.14
  -1   7   5  153.90   11.19
   1  -7  -5  139.70    7.68
   1  -7  -5  123.08    7.26
   1  -7  -5  138.67    7.22
   1  -7  -4  243.00   11.59
   1  -7  -4  257.25   11.73
   1  -7  -4  248.66   11.73
   1  -7  -4  232.93   11.62
   1  -7  -4  240.77   11.19
   1  -7  -3   59.80    3.72
   1  -7  -3   58.96    3.93
   1  -7  -3   55.63    3.92
   1  -7  -3   54.78    3.77
   1  -7  -3   60.12    3.93
   1  -7  -2  116.61    9.24
   1  -7  -2  117.90    6.39
   1  -7  -2  118.96    6.26
   1  -7  -1    0.13    1.73
   1  -7  -1    0.49    3.02
   1  -7  -1    2.08    1.56
   1  -7  -1    5.97    1.53
   1  -7   0    3.04    3.32
   1  -7   0    3.55    1.66
   1  -7   0    5.20    1.50
   1  -7   1   10.58    3.86
   1  -7   1    8.13    2.11
   1  -7   1    5.91    1.73
   1  -7   1    5.35    1.74
   1  -7   2    2.33    1.71
   1  -7   2    3.89    3.49
   1  -7   2    4.85    2.01
   1  -7   3  161.61   11.74
   1  -7   3  153.05    8.12
  -1   7  -3  146.68   11.14
   1  -7   3  172.69    8.64
   1  -7   4   23.70    3.14
   1  -7   4   28.57    5.59
  -1   7  -4   17.90    4.12
   1  -7   5    1.85    3.42
  -1   7  -7   -0.50    1.58
   1  -7   7    4.01    2.10
   1  -7   8    9.32    1.72
   1  -7   8   10.90    2.16
  -1   7  -8    9.46    2.23
  -1   7  -9   39.61    2.84
  -1   7  -9   31.59    2.39
   1  -6 -12   75.56    4.41
   1  -6 -12   80.72    4.28
   1  -6 -11   13.52    2.18
   1  -6 -11   12.74    2.03
   1  -6 -10  102.37    5.48
   1  -6 -10   86.51    5.67
   1  -6 -10  103.91    5.57
   1  -6 -10   89.94    6.13
   1  -6 -10   77.80    5.49
   1  -6  -9   64.01    4.28
   1  -6  -9   55.82    4.58
   1  -6  -9   59.38    4.20
   1  -6  -9   65.56    4.90
   1  -6  -9   57.32    4.01
   1  -6  -9   60.44    4.26
   1  -6  -8    3.73    1.98
   1  -6  -8    4.08    2.29
   1  -6  -8    2.67    1.96
   1  -6  -8    3.37    2.22
   1  -6  -8    4.06    2.20
   1  -6  -8    2.28    1.82
   1  -6  -7   39.36    3.81
   1  -6  -7   41.21    3.74
   1  -6  -7   44.76    3.41
   1  -6  -7   47.04    3.82
   1  -6  -7   39.19    3.25
   1  -6  -6    6.19    1.71
  -1   6   6    8.39    3.27
   1  -6  -6    4.91    1.91
   1  -6  -6    4.13    1.43
   1  -6  -6    9.84    2.06
   1  -6  -6    4.12    2.02
   1  -6  -5  338.93   15.80
   1  -6  -5  339.96   15.67
   1  -6  -5  328.46   15.47
   1  -6  -5  353.34   15.55
   1  -6  -5  334.74   15.32
   1  -6  -5  349.64   15.48
   1  -6  -5  337.91   15.67
   1  -6  -4   15.71    2.14
   1  -6  -4    9.75    1.71
   1  -6  -4   14.20    1.59
   1  -6  -4   13.78    1.94
   1  -6  -4   10.23    1.78
   1  -6  -4   10.49    1.83
   1  -6  -3  167.57    8.26
   1  -6  -3  179.00    8.42
   1  -6  -3  174.29    8.38
   1  -6  -3  164.51    8.09
   1  -6  -2  678.57   29.21
   1  -6  -2  663.48   29.01
   1  -6  -2  667.38   28.94
   1  -6  -2  758.12   32.32
   1  -6  -1  256.95   14.07
   1  -6  -1  264.88   12.54
   1  -6  -1  278.61   12.50
   1  -6  -1  293.80   15.30
   1  -6   0   23.16    4.13
   1  -6   0   20.17    2.10
   1  -6   0   17.72    2.09
   1  -6   0   14.63    1.97
   1  -6   0   15.61    3.07
   1  -6   1  100.82    7.95
   1  -6   1   92.16    5.23
   1  -6   1   97.12    5.41
   1  -6   1  100.66    7.41
   1  -6   2   18.25    2.31
   1  -6   2   17.67    4.17
   1  -6   2   12.75    3.35
   1  -6   2   16.47    1.93
   1  -6   3  372.01   17.19
  -1   6  -3  383.20   20.11
   1  -6   3  417.74   20.85
   1  -6   3  368.07   16.78
   1  -6   4   93.11    8.38
  -1   6  -4   68.70    6.68
   1  -6   5    5.35    4.01
  -1   6  -6  155.50    7.89
   1  -6   6  179.56    9.05
   1  -6   7   74.32    5.06
  -1   6  -7   68.52    4.41
   1  -6   8    2.92    2.12
  -1   6  -8    0.88    1.38
   1  -6   9   18.58    2.48
   1  -6   9   17.56    1.93
  -1   6 -10   18.71    2.14
  -1   6 -10   16.72    1.90
   1  -5 -13   18.20    1.66
   1  -5 -12    1.41    1.46
   1  -5 -12    0.35    1.39
   1  -5 -12    0.83    1.38
   1  -5 -11   58.96    3.85
   1  -5 -11   63.77    4.11
   1  -5 -11   58.95    4.63
   1  -5 -11   59.18    4.04
   1  -5 -11   63.68    4.32
   1  -5 -10    0.91    2.31
   1  -5 -10    1.87    1.90
   1  -5 -10    4.23    2.19
   1  -5 -10    3.95    1.98
   1  -5 -10    2.63    1.80
   1  -5 -10    3.34    2.42
   1  -5  -9   68.54    4.58
   1  -5  -9   61.84    4.23
   1  -5  -9   73.45    4.58
   1  -5  -9   76.82    4.67
   1  -5  -9   71.06    4.84
   1  -5  -9   63.24    4.84
   1  -5  -9   76.98    5.16
   1  -5  -8   11.62    2.70
   1  -5  -8   10.39    2.04
   1  -5  -8    5.75    1.82
   1  -5  -8    8.67    2.33
   1  -5  -8    5.76    2.10
   1  -5  -7  169.00    8.97
   1  -5  -7  180.55    8.65
   1  -5  -7  164.79    8.83
   1  -5  -7  171.33    8.55
   1  -5  -7  174.72    8.99
   1  -5  -7  166.88    8.77
   1  -5  -6    2.50    1.57
   1  -5  -6    1.53    1.48
  -1   5   6    0.79    2.18
   1  -5  -6   -0.17    1.53
   1  -5  -6    2.98    1.67
   1  -5  -5  238.00   11.08
   1  -5  -5  231.04   11.40
   1  -5  -5  240.19   11.11
   1  -5  -5  245.39   11.31
   1  -5  -5  240.13   11.07
   1  -5  -4  146.31    7.17
   1  -5  -4  167.91    7.53
   1  -5  -3    5.30    1.40
   1  -5  -3    5.48    1.26
   1  -5  -3    5.92    1.16
   1  -5  -2  543.86   24.84
   1  -5  -2  541.11   23.68
   1  -5  -2  576.00   26.00
   1  -5  -2  555.65   23.56
   1  -5  -1    0.36    2.18
   1  -5  -1    2.83    1.12
   1  -5  -1    3.74    2.43
   1  -5  -1    1.99    1.77
   1  -5   0  281.45   15.23
   1  -5   0  296.93   12.73
   1  -5   0  276.89   14.52
   1  -5   0  272.50   12.71
   1  -5   0  294.73   14.99
   1  -5   1  111.20    5.99
   1  -5   1  122.61    7.90
   1  -5   1  126.70    8.21
   1  -5   1  121.69    5.93
   1  -5   2  325.56   14.48
   1  -5   2  338.97   17.20
   1  -5   2  311.57   14.21
   1  -5   3   95.54    7.38
   1  -5   3   97.31    5.04
  -1   5  -4   75.67    6.31
  -1   5  -4   76.83    4.08
   1  -5   4   78.68    6.93
  -1   5  -5   80.84    4.51
   1  -5   5   90.32    5.36
  -1   5  -6   21.79    2.16
   1  -5   6   18.41    2.78
  -1   5  -7  258.16   12.34
  -1   5  -7  257.32   12.25
   1  -5   7  277.23   12.94
  -1   5  -8   11.80    1.92
   1  -5   8   13.48    2.53
  -1   5  -8   12.34    2.12
  -1   5  -9    5.59    2.46
   1  -5   9    4.47    2.01
  -1   5 -10   13.81    2.33
   1  -5  10   13.16    2.12
  -1   5 -11   33.64    2.64
  -1   5 -11   33.28    2.54
   1  -4 -13   23.67    1.96
   1  -4 -13   25.85    2.07
   1  -4 -12   30.92    2.63
   1  -4 -12   32.52    3.25
   1  -4 -12   31.03    2.72
   1  -4 -11   14.33    3.06
   1  -4 -11   10.70    2.10
   1  -4 -11   11.92    2.13
   1  -4 -11   11.78    2.22
   1  -4 -11   17.46    3.00
   1  -4 -11   10.44    1.91
   1  -4 -10  305.26   15.14
   1  -4 -10  301.25   14.06
   1  -4 -10  297.68   14.43
   1  -4 -10  301.26   14.21
   1  -4 -10  311.97   15.07
   1  -4 -10  313.89   14.33
   1  -4  -9  269.99   13.49
   1  -4  -9  268.40   12.66
   1  -4  -9  254.52   12.94
   1  -4  -9  274.53   12.77
   1  -4  -9  266.17   13.02
   1  -4  -9  281.88   12.88
   1  -4  -9  270.42   13.44
   1  -4  -8   38.90    3.58
   1  -4  -8   35.71    2.93
   1  -4  -8   30.59    3.16
   1  -4  -8   34.80    3.01
   1  -4  -8   38.05    3.20
   1  -4  -8   32.75    3.37
   1  -4  -7  533.98   24.00
   1  -4  -7  532.86   23.58
   1  -4  -7  544.03   23.87
   1  -4  -7  533.40   23.57
   1  -4  -7  520.11   23.85
   1  -4  -7  590.33   24.31
  -1   4   6    7.40    2.14
  -1   4   5  381.58   18.72
   1  -4  -4   12.50    2.49
   1  -4  -3  365.58   17.63
   1  -4  -3  356.54   16.02
   1  -4  -2  512.57   24.88
   1  -4  -2  565.51   24.77
   1  -4  -2  536.82   23.78
   1  -4  -1  268.13   13.42
   1  -4  -1  257.81   13.01
   1  -4  -1  253.47   12.54
   1  -4   0   22.19    3.04
   1  -4   0   23.57    3.06
   1  -4   0   27.83    2.90
   1  -4   1  865.76   38.61
   1  -4   1  868.66   38.45
   1  -4   1  872.36   38.41
   1  -4   2    3.08    1.91
   1  -4   2    2.63    1.09
   1  -4   3 1114.76   49.23
   1  -4   4  179.02   10.47
  -1   4  -4  170.57    7.78
  -1   4  -4  179.03    9.77
  -1   4  -4  161.18    7.56
   1  -4   4  176.80    8.28
  -1   4  -5  145.73    7.04
   1  -4   5  151.03    9.85
  -1   4  -5  127.09    8.27
  -1   4  -5  149.96    6.83
   1  -4   5  157.94    7.63
  -1   4  -6  605.65   25.94
   1  -4   6  618.15   26.44
  -1   4  -6  591.44   25.58
  -1   4  -7  117.47    6.37
  -1   4  -7  121.52    5.94
   1  -4   7  120.86    6.75
  -1   4  -7  122.68    6.35
  -1   4  -8   41.75    3.31
  -1   4  -8   45.14    2.90
   1  -4   8   45.92    3.66
  -1   4  -8   38.03    3.01
  -1   4  -9    5.20    2.48
   1  -4   9    3.79    1.98
  -1   4  -9    6.48    1.91
   1  -4  10   34.41    3.11
  -1   4 -10   37.49    3.63
  -1   4 -11   67.66    4.41
   1  -3 -13    3.48    1.35
   1  -3 -13    7.45    1.30
   1  -3 -12   62.38    3.91
   1  -3 -12   51.82    4.11
   1  -3 -12   53.06    3.63
   1  -3 -11  159.52    8.56
   1  -3 -11  152.84    7.98
   1  -3 -11  160.17    7.88
   1  -3 -11  143.33    7.68
   1  -3 -11  146.57    7.52
   1  -3 -10  128.62    7.49
   1  -3 -10  127.74    6.95
   1  -3 -10  122.25    6.83
   1  -3 -10  119.53    6.78
   1  -3 -10  124.98    6.62
   1  -3  -9   92.90    6.01
   1  -3  -9   90.98    5.85
   1  -3  -9   88.30    4.65
   1  -3  -9   88.34    5.29
   1  -3  -9   75.08    5.07
   1  -3  -8   24.42    2.94
   1  -3  -8   26.79    2.54
   1  -3  -8   15.33    2.21
   1  -3  -8   25.52    2.77
   1  -3  -8   23.80    2.64
   1  -3  -8   23.97    1.91
   1  -3  -8   17.45    4.27
   1  -3  -7   65.63    4.39
   1  -3  -7   71.58    4.60
   1  -3  -7   71.67    6.89
   1  -3  -7   68.93    3.64
   1  -3  -7   72.66    4.52
   1  -3  -6   -0.45    2.58
   1  -3  -6    2.40    1.16
   1  -3  -5  840.80   38.73
  -1   3   5  848.32   37.07
   1  -3  -4  175.50   10.40
   1  -3  -4  180.71    9.36
   1  -3  -3   96.76    6.64
   1  -3  -3  104.29    6.12
   1  -3  -2  581.93   26.45
   1  -3  -2  602.05   26.30
   1  -3  -1  713.76   31.14
   1  -3   0   20.97    2.49
   1  -3   0   18.93    2.34
   1  -3   1  297.30   14.28
   1  -3   2    2.02    1.51
   1  -3   2    3.24    1.71
   1  -3   3  469.35   21.45
   1  -3   3  471.38   22.01
  -1   3  -4  403.40   17.95
  -1   3  -4  418.41   19.34
   1  -3   4  428.72   20.35
   1  -3   4  442.46   18.33
  -1   3  -5  663.00   28.13
   1  -3   5  712.59   28.76
  -1   3  -5  675.26   28.36
   1  -3   5  684.87   31.01
  -1   3  -5  602.60   29.16
  -1   3  -6  429.07   19.23
  -1   3  -6  433.89   19.23
   1  -3   6  454.78   19.54
  -1   3  -6  446.96   18.94
  -1   3  -7    3.05    1.26
  -1   3  -7    5.93    1.59
   1  -3   7    3.63    1.74
  -1   3  -7    2.82    1.42
  -1   3  -8   15.46    1.81
  -1   3  -8   13.77    2.18
   1  -3   8   13.54    2.26
  -1   3  -8    8.37    1.70
  -1   3  -9   30.35    2.55
   1  -3   9   34.39    3.13
  -1   3  -9   33.56    3.65
  -1   3  -9   36.01    3.22
  -1   3 -10    4.83    1.95
  -1   3 -10    2.42    2.40
  -1   3 -10    4.15    1.42
   1  -3  10    5.59    1.87
  -1   3 -11   73.07    4.89
  -1   3 -12   35.58    2.83
  -1   3 -12   26.42    2.44
   1  -2 -13   23.98    1.97
   1  -2 -13   22.37    2.19
   1  -2 -12    0.37    1.54
   1  -2 -12    2.33    1.75
   1  -2 -12    2.98    1.90
   1  -2 -11   -1.28    1.46
   1  -2 -11    0.89    1.72
   1  -2 -11    2.79    2.17
   1  -2 -11    3.73    1.42
   1  -2 -11    0.51    2.53
   1  -2 -10  146.30    7.66
   1  -2 -10  129.48    7.32
   1  -2 -10  155.69    8.69
   1  -2 -10  151.20    8.23
   1  -2 -10  148.24    7.17
   1  -2  -9   21.02    2.06
   1  -2  -9   17.84    3.00
   1  -2  -9   16.82    2.23
   1  -2  -9   22.92    2.22
   1  -2  -9   22.73    2.98
   1  -2  -9   22.84    2.52
   1  -2  -8    0.40    1.33
   1  -2  -8    2.43    1.12
   1  -2  -8    2.65    1.24
   1  -2  -8   -0.52    2.68
   1  -2  -8    0.17    1.58
   1  -2  -7  233.69   10.44
   1  -2  -7  228.88   13.65
   1  -2  -6  122.04    5.72
   1  -2  -6  126.59    8.47
  -1   2   5 1221.99   50.30
   1  -2  -5 1151.30   49.44
   1  -2  -5 1291.94   52.35
   1  -2  -4  265.51   12.07
   1  -2  -4  252.94   13.24
  -1   2   4  256.72   12.23
   1  -2  -3  212.22   11.15
   1  -2  -3  221.63   10.39
   1  -2  -2 1601.87   67.35
   1  -2  -1 4630.53  191.65
   1  -2   0  283.17   12.79
   1  -2   1 2404.82  100.42
   1  -2   2   72.57    4.33
   1  -2   3  817.20   34.62
   1  -2   3  779.05   34.01
  -1   2  -3  788.29   34.13
   1  -2   4   20.71    2.69
  -1   2  -4   18.89    2.04
   1  -2   4   23.42    2.09
  -1   2  -5   39.72    2.45
  -1   2  -5   35.34    2.52
   1  -2   5   41.81    2.63
   1  -2   6  730.21   30.69
  -1   2  -6  701.50   30.25
   1  -2   6  760.66   32.67
  -1   2  -6  746.67   30.54
  -1   2  -6  693.21   30.43
  -1   2  -7   45.04    3.14
  -1   2  -7   48.04    3.02
  -1   2  -7   49.34    2.93
   1  -2   7   50.34    3.32
  -1   2  -8  321.47   14.95
  -1   2  -8  318.88   15.18
  -1   2  -8  332.34   14.60
  -1   2  -8  310.77   14.18
  -1   2  -8  323.26   14.20
   1  -2   8  314.46   14.57
  -1   2  -9  316.00   14.61
  -1   2  -9  300.92   15.15
  -1   2  -9  333.75   14.23
   1  -2   9  305.67   14.48
  -1   2  -9  313.60   14.98
  -1   2 -10   47.40    3.71
  -1   2 -10   48.11    4.17
  -1   2 -10   46.54    3.90
  -1   2 -10   47.08    3.24
  -1   2 -11    1.72    1.81
  -1   2 -11   -1.33    2.17
  -1   2 -12   -0.50    1.49
  -1   2 -12   -1.65    1.84
  -1   2 -13    5.88    1.19
   1  -1 -13   22.45    2.11
   1  -1 -13   18.44    1.75
   1  -1 -12    7.13    1.56
   1  -1 -12    9.16    1.79
   1  -1 -11   69.91    4.61
   1  -1 -11   75.16    4.45
   1  -1 -11   71.16    4.86
   1  -1 -11   77.62    4.71
   1  -1 -11   82.34    5.80
   1  -1 -10  169.10    8.35
   1  -1 -10  168.59    8.92
   1  -1 -10  177.07    8.61
   1  -1 -10  161.72    9.53
   1  -1  -9    2.29    1.99
   1  -1  -9    2.70    1.76
   1  -1  -9    4.41    1.54
   1  -1  -9    3.81    1.55
   1  -1  -9    2.92    1.73
   1  -1  -8    7.09    2.17
   1  -1  -8    4.15    1.61
   1  -1  -8    4.00    1.33
   1  -1  -8    3.08    1.54
   1  -1  -8    2.21    2.53
   1  -1  -7  135.22    6.63
   1  -1  -7  135.38    6.52
   1  -1  -7  145.86    9.14
   1  -1  -6   69.31    5.46
   1  -1  -5  593.76   27.07
   1  -1  -4  516.13   22.72
   1  -1  -4  512.60   21.26
  -1   1   4  472.33   21.40
   1  -1  -3   36.08    2.95
  -1   1   3   35.89    2.47
   1  -1  -2 2558.39  102.36
  -1   1   2 2374.66  101.95
  -1   1   1 1856.80   77.41
   1  -1   0 1198.79   50.51
  -1   1   0 1251.55   51.05
  -1   1  -1  103.42    5.28
  -1   1  -2 2023.89   84.27
  -1   1  -3  595.47   25.48
   1  -1   4    6.83    0.90
  -1   1  -4    4.11    0.92
   1  -1   4    6.98    1.65
  -1   1  -5   80.67    4.11
   1  -1   5   90.14    5.33
   1  -1   6  992.09   41.69
  -1   1  -6  978.67   41.48
   1  -1   6 1009.73   43.08
  -1   1  -6 1030.41   44.26
  -1   1  -7   78.18    4.25
   1  -1   7   81.58    4.41
  -1   1  -7   84.96    4.29
  -1   1  -7   90.79    6.72
  -1   1  -8  222.29   10.93
  -1   1  -8  219.99   10.03
  -1   1  -8  228.51   10.16
   1  -1   8  213.18   10.22
  -1   1  -8  225.63   11.03
  -1   1  -8  206.09   12.89
  -1   1  -9  201.14   10.54
  -1   1  -9  210.08   10.63
  -1   1  -9  202.71    9.60
  -1   1 -10    0.75    1.91
  -1   1 -10    1.57    2.25
  -1   1 -10    2.96    2.54
  -1   1 -10    0.70    1.60
  -1   1 -11   55.27    4.66
  -1   1 -11   66.10    4.24
  -1   1 -11   65.79    4.89
  -1   1 -12    0.51    1.47
  -1   1 -12    1.23    1.91
  -1   1 -13    2.05    1.09
   1   0 -13   65.56    3.50
   1   0 -13   71.29    3.91
   1   0 -12    4.61    1.57
   1   0 -12    4.58    1.61
   1   0 -11   10.05    2.02
   1   0 -11   10.15    2.09
   1   0 -10  127.03    7.96
   1   0 -10  135.99    7.07
   1   0 -10  135.17    7.02
   1   0  -9   36.85    3.76
   1   0  -9   36.93    3.06
   1   0  -9   34.14    2.99
   1   0  -9   40.52    3.40
   1   0  -8   10.92    2.33
   1   0  -8   10.82    1.84
   1   0  -8    7.64    1.67
   1   0  -8   11.65    2.08
  -1   0   7  148.21    7.18
   1   0  -7  154.69    7.16
   1   0  -7  145.43    7.12
   1   0  -7  142.48    8.91
  -1   0   6   39.69    2.49
   1   0  -6   39.55    2.46
   1   0  -6   39.07    3.70
   1   0  -6   38.92    2.46
   1   0  -5  215.32   10.89
  -1   0   4   54.94    2.69
   1   0  -4   69.02    3.99
   1   0  -3    9.48    1.43
   1   0  -3    9.28    1.19
  -1   0   3    8.40    1.04
   1   0  -2  959.70   38.97
   1   0  -2  889.72   38.91
  -1   0   2  925.18   38.84
  -1   0   1 2169.27   92.38
   1   0  -1 2287.91   92.47
  -1   0   0  487.17   20.85
   1   0   1  340.52   14.90
  -1   0  -2  899.30   38.00
   1   0   2  911.07   38.13
   1   0   3  395.53   16.66
  -1   0  -3  375.92   16.51
  -1   0  -4  221.74    9.50
   1   0   5   86.33    4.80
  -1   0  -6  348.48   14.34
  -1   0  -6  309.08   14.16
  -1   0  -6  343.30   16.98
  -1   0  -7    3.97    1.08
  -1   0  -7    4.55    1.21
  -1   0  -7    2.44    2.35
  -1   0  -7    3.62    1.13
  -1   0  -8  162.84    8.40
  -1   0  -8  160.79    7.54
  -1   0  -8  145.41    7.65
  -1   0  -8  159.36    8.28
  -1   0  -8  159.13   10.69
  -1   0  -9  199.41   10.62
  -1   0  -9  206.92    9.66
  -1   0  -9  206.77    9.85
  -1   0  -9  207.06   10.50
  -1   0  -9  185.09   12.91
  -1   0 -10    7.90    2.01
  -1   0 -10    5.12    1.83
  -1   0 -10   12.63    2.73
  -1   0 -10    9.95    2.67
  -1   0 -11    1.29    1.75
  -1   0 -11    2.61    1.80
  -1   0 -11   -1.03    1.81
  -1   0 -11    2.14    2.37
  -1   0 -11    5.18    2.54
  -1   0 -12    3.67    1.60
  -1   0 -12    3.36    2.17
   1   1 -12   40.65    2.96
   1   1 -12   42.62    3.07
   1   1 -11   11.67    2.14
   1   1 -11   10.61    2.12
  -1  -1  10   19.17    2.40
   1   1 -10   22.65    2.90
   1   1 -10   22.10    2.56
   1   1 -10   24.77    2.62
   1   1  -9   35.43    3.38
   1   1  -9   40.52    3.13
   1   1  -9   36.07    3.65
   1   1  -8  470.84   21.07
   1   1  -8  487.54   20.63
  -1  -1   8  455.45   20.69
   1   1  -8  470.50   21.39
   1   1  -7   29.24    2.32
  -1  -1   7   28.79    2.34
  -1  -1   7   30.67    2.48
   1   1  -7   26.88    2.28
   1   1  -6  271.64   12.62
  -1  -1   6  299.67   12.86
   1   1  -6  287.48   12.70
  -1  -1   6  293.98   12.89
   1   1  -5  554.94   23.51
   1   1  -5  554.88   24.37
  -1  -1   4  293.45   12.57
   1   1  -4  267.08   12.68
  -1  -1   3   54.85    3.02
   1   1  -3   54.06    2.90
  -1  -1   2 1346.45   56.38
  -1  -1   1  130.02    6.35
  -1  -1   0    8.15    1.18
  -1  -1  -1   18.11    1.52
  -1  -1  -2  415.23   18.05
  -1  -1  -3 1989.68   82.78
  -1  -1  -4 1933.75   79.06
  -1  -1  -4 1837.20   77.23
  -1  -1  -5  233.12   10.47
   1   1   5  218.32    7.50
  -1  -1  -6    5.78    1.12
  -1  -1  -6    5.47    2.25
  -1  -1  -6    6.47    1.05
  -1  -1  -7   53.70    3.21
  -1  -1  -7   54.44    3.04
  -1  -1  -7   49.58    5.44
  -1  -1  -7   55.50    3.22
  -1  -1  -8  291.81   12.67
  -1  -1  -8  280.73   13.30
  -1  -1  -8  277.84   13.43
  -1  -1  -8  284.94   16.52
  -1  -1  -8  267.54   12.55
  -1  -1  -9  162.45    7.95
  -1  -1  -9  160.10    8.65
  -1  -1  -9  158.15    8.87
  -1  -1  -9  154.61   11.54
  -1  -1  -9  161.63    7.91
  -1  -1 -10    8.28    2.74
  -1  -1 -10    1.48    2.40
  -1  -1 -10    3.17    3.26
  -1  -1 -10    2.15    1.59
  -1  -1 -10    1.91    1.56
  -1  -1 -11  116.56    6.79
  -1  -1 -11  118.68    7.37
  -1  -1 -11  109.14    6.07
  -1  -1 -12   14.39    3.09
  -1  -1 -12   12.96    1.94
  -1  -1 -12   16.31    2.48
  -1  -1 -13    2.35    1.62
  -1  -1 -13    3.17    1.34
  -1  -1 -13    4.25    2.02
   1   2 -12   18.07    2.06
   1   2 -12   16.10    1.83
   1   2 -11    2.89    1.66
   1   2 -10   38.80    3.53
   1   2 -10   44.97    3.30
  -1  -2  10   38.15    3.30
   1   2  -9    0.62    1.74
   1   2  -9    0.36    1.97
   1   2  -9    0.58    1.87
   1   2  -8  189.27    9.32
   1   2  -8  191.57    9.92
   1   2  -8  204.89    9.60
   1   2  -8  202.89    9.88
   1   2  -7  389.77   17.06
   1   2  -7  391.23   17.17
  -1  -2   7  375.42   17.38
   1   2  -7  395.16   17.54
  -1  -2   6    2.05    1.29
  -1  -2   6    3.20    1.34
   1   2  -6    5.51    1.25
   1   2  -6    4.02    1.23
   1   2  -5  519.02   22.15
  -1  -2   5  547.63   22.51
  -1  -2   5  541.05   22.48
   1   2  -5  489.26   22.09
  -1  -2   4    8.87    1.37
  -1  -2   3   66.34    3.97
  -1  -2   2  469.70   20.69
  -1  -2   1   87.32    4.92
  -1  -2   0 8140.82  337.53
  -1  -2   0 8254.11  338.06
  -1  -2  -1 3813.61  158.19
  -1  -2  -2 5742.79  239.57
  -1  -2  -2 5813.25  239.89
  -1  -2  -2 5811.83  239.53
  -1  -2  -3 1750.31   73.42
  -1  -2  -4   30.75    3.42
  -1  -2  -4   33.86    2.61
  -1  -2  -5   92.72    6.56
  -1  -2  -5   84.44    4.75
  -1  -2  -6  930.22   42.51
  -1  -2  -7  125.99    9.55
  -1  -2  -7  132.12    6.38
  -1  -2  -7  138.73    6.45
  -1  -2  -8  303.11   13.60
  -1  -2  -8  308.27   13.65
  -1  -2  -8  309.46   14.41
  -1  -2  -8  296.41   17.80
  -1  -2  -8  304.05   14.24
  -1  -2  -9   92.12    5.30
  -1  -2  -9   94.06    8.96
  -1  -2  -9  101.05    6.38
  -1  -2  -9   98.16    5.23
  -1  -2  -9   98.43    5.23
  -1  -2  -9  102.90    5.90
  -1  -2 -10    1.40    3.61
  -1  -2 -10    0.24    1.32
  -1  -2 -10    2.25    2.41
  -1  -2 -10    2.21    1.69
  -1  -2 -11   86.27    5.12
  -1  -2 -11   90.79    5.98
  -1  -2 -11   94.72    6.49
  -1  -2 -12    4.50    1.59
  -1  -2 -12    5.11    2.25
  -1  -2 -12    5.88    2.70
  -1  -2 -12    2.97    2.01
  -1  -2 -13    4.92    1.68
  -1  -2 -13    3.68    1.64
  -1  -2 -13    8.56    2.31
   1   3 -12    1.77    1.30
   1   3 -12    2.05    1.02
   1   3 -11    4.17    1.69
   1   3 -11    5.96    1.64
  -1  -3  11    3.62    1.54
   1   3 -10  184.01    8.98
   1   3 -10  168.14    8.88
  -1  -3  10  172.79    9.00
   1   3 -10  179.43    8.60
   1   3  -9    0.52    1.90
   1   3  -9    1.36    1.94
  -1  -3   9    1.09    2.10
   1   3  -9    1.85    1.71
   1   3  -8  407.67   18.26
   1   3  -8  402.18   17.89
   1   3  -8  388.03   17.65
  -1  -3   7    9.46    1.97
   1   3  -7   10.75    1.86
   1   3  -7    8.75    1.75
   1   3  -7    5.26    1.94
   1   3  -6   40.13    2.77
  -1  -3   6   39.09    3.14
   1   3  -6   39.42    2.76
   1   3  -5  183.22    8.92
  -1  -3   5  187.00    9.35
  -1  -3   5  208.86    9.50
   1   3  -5  203.21    9.00
  -1  -3   5  204.71    9.13
   1   3  -4   46.48    2.63
  -1  -3   4   50.83    3.05
  -1  -3   4   43.62    3.51
  -1  -3   4   49.28    2.84
  -1  -3   4   42.05    3.02
  -1  -3   3  510.24   22.14
  -1  -3   3  525.46   23.25
  -1  -3   2   69.73    4.65
  -1  -3   1  850.79   37.00
  -1  -3   0 8375.40  335.04
  -1  -3   0 7912.76  334.32
  -1  -3  -1 1050.89   44.11
  -1  -3  -1 1002.32   44.16
  -1  -3  -2 1787.56   75.44
  -1  -3  -2 1767.63   75.13
  -1  -3  -3 1024.99   45.48
  -1  -3  -3 1048.21   44.78
  -1  -3  -4  172.69    9.08
  -1  -3  -5    4.69    2.33
  -1  -3  -5    8.13    1.72
  -1  -3  -6  119.16    8.56
  -1  -3  -6   96.55    5.92
  -1  -3  -7   27.37    4.89
  -1  -3  -8  502.90   25.09
  -1  -3  -8  453.62   19.88
  -1  -3  -8  444.69   19.42
  -1  -3  -8  458.00   20.21
  -1  -3  -8  420.63   19.64
  -1  -3  -8  443.88   20.44
  -1  -3  -8  433.33   19.93
  -1  -3  -8  482.56   20.49
  -1  -3  -8  444.72   20.33
  -1  -3  -9   31.19    2.81
  -1  -3  -9   25.28    5.43
  -1  -3  -9   28.08    2.63
  -1  -3  -9   26.52    3.29
  -1  -3  -9   31.38    3.20
  -1  -3 -10   11.45    4.32
  -1  -3 -10   13.19    2.20
  -1  -3 -10   16.55    2.47
  -1  -3 -10   10.49    2.46
  -1  -3 -10   11.85    2.07
  -1  -3 -11    4.41    1.61
  -1  -3 -11    7.13    2.32
  -1  -3 -11    7.00    2.50
  -1  -3 -11    6.40    1.84
  -1  -3 -11    6.65    3.49
  -1  -3 -12   23.87    3.08
  -1  -3 -12   18.62    2.14
  -1  -3 -12   21.32    2.69
  -1  -3 -13   55.85    3.93
  -1  -3 -13   55.24    3.61
  -1  -3 -13   56.43    4.34
   1   4 -11    2.13    1.40
   1   4 -11    1.91    1.17
  -1  -4  11    1.14    1.30
   1   4 -10   39.83    3.30
   1   4 -10   44.70    3.34
   1   4 -10   46.96    3.10
  -1  -4  10   40.81    3.51
   1   4  -9   54.07    3.93
   1   4  -9   56.33    4.02
   1   4  -9   57.72    3.67
   1   4  -8   13.18    2.27
  -1  -4   8   12.40    2.58
   1   4  -8   15.93    2.16
   1   4  -8   13.03    2.49
   1   4  -7  594.36   25.69
   1   4  -6  185.21    9.19
   1   4  -6  205.15    9.34
  -1  -4   6  194.55    9.93
  -1  -4   6  204.30    9.48
  -1  -4   5    4.02    1.81
   1   4  -5    6.11    1.35
  -1  -4   5    7.39    1.54
   1   4  -4   56.01    3.18
  -1  -4   4   54.42    4.66
  -1  -4   4   57.89    3.83
  -1  -4   4   61.38    3.64
  -1  -4   3   98.19    6.52
  -1  -4   3   99.85    5.18
  -1  -4   2  822.15   36.98
  -1  -4   2  834.81   35.25
  -1  -4   2  828.89   35.15
  -1  -4   1    9.37    1.32
  -1  -4   1   11.91    2.41
  -1  -4   0 1264.31   54.78
  -1  -4  -1  497.79   22.66
  -1  -4  -1  471.40   22.21
  -1  -4  -2   81.35    5.73
  -1  -4  -3   13.85    2.80
  -1  -4  -3   16.49    2.61
  -1  -4  -4  620.18   29.06
  -1  -4  -4  601.59   27.89
  -1  -4  -5    7.32    2.05
  -1  -4  -6  170.23   11.47
  -1  -4  -6  158.40    9.28
  -1  -4  -7   88.31    5.14
  -1  -4  -7   91.16    5.44
  -1  -4  -7   88.11    5.38
  -1  -4  -7   92.34    4.89
  -1  -4  -7   99.35    5.40
  -1  -4  -7  110.55    9.13
  -1  -4  -7   94.89    5.61
  -1  -4  -7   99.82    5.66
  -1  -4  -7  101.56    5.27
  -1  -4  -7   79.28    4.83
  -1  -4  -8    7.28    1.91
  -1  -4  -8    6.36    2.08
  -1  -4  -8    7.06    2.04
  -1  -4  -8    8.06    1.55
  -1  -4  -8    5.92    1.88
  -1  -4  -8   12.20    2.19
  -1  -4  -8    7.80    3.95
  -1  -4  -8    8.48    2.15
  -1  -4  -8   11.11    2.54
  -1  -4  -8    7.20    1.67
  -1  -4  -8    9.30    1.81
  -1  -4  -9  556.80   25.55
  -1  -4  -9  539.56   25.10
  -1  -4  -9  537.45   24.36
  -1  -4  -9  570.66   24.62
  -1  -4  -9  576.02   25.50
  -1  -4  -9  592.14   25.65
  -1  -4  -9  559.06   30.45
  -1  -4  -9  578.04   25.05
  -1  -4  -9  576.05   25.01
  -1  -4 -10  289.08   13.10
  -1  -4 -10  281.23   13.20
  -1  -4 -10  255.32   13.71
  -1  -4 -10  273.46   12.69
  -1  -4 -10  269.77   18.28
  -1  -4 -10  258.21   13.55
  -1  -4 -11  101.31    5.90
  -1  -4 -11   92.68    5.58
  -1  -4 -11  104.45    6.71
  -1  -4 -11   92.11    5.31
  -1  -4 -11  100.03    6.50
  -1  -4 -12   21.05    2.55
  -1  -4 -12   21.32    3.33
  -1  -4 -12   26.49    3.23
  -1  -4 -13    5.48    1.59
  -1  -4 -13    9.07    2.27
  -1  -4 -13    5.72    1.87
  -1  -5  11    8.25    1.40
   1   5 -10  124.70    6.49
   1   5 -10  131.57    6.20
  -1  -5  10  125.33    6.79
   1   5  -9   27.18    2.67
   1   5  -9   25.42    2.64
   1   5  -9   28.90    2.47
  -1  -5   9   28.53    3.19
   1   5  -8   38.06    3.25
   1   5  -8   34.87    3.37
   1   5  -8   38.33    2.97
  -1  -5   8   39.01    3.74
  -1  -5   7   13.26    2.83
   1   5  -7   11.62    2.08
   1   5  -7   13.54    2.28
   1   5  -6   22.51    2.32
  -1  -5   6   20.97    2.86
  -1  -5   5  294.77   13.74
  -1  -5   4  140.71    7.30
  -1  -5   3   16.72    2.05
  -1  -5   3   16.39    3.21
  -1  -5   3   13.29    1.58
  -1  -5   2   39.64    2.83
  -1  -5   2   34.83    4.34
  -1  -5   2   35.60    2.83
  -1  -5   2   35.56    2.51
  -1  -5   1   10.51    1.46
  -1  -5   1    9.92    1.56
  -1  -5   1    6.41    2.52
  -1  -5   1    9.53    3.33
  -1  -5   1    8.54    1.33
  -1  -5   1   10.57    1.57
  -1  -5   0   11.62    2.99
  -1  -5   0   14.10    3.44
  -1  -5   0   11.71    1.53
  -1  -5   0   12.56    1.61
  -1  -5  -1 1157.47   52.14
  -1  -5  -1 1185.65   49.49
  -1  -5  -1 1175.55   49.50
  -1  -5  -2  356.01   15.62
  -1  -5  -3  644.14   30.64
  -1  -5  -3  667.77   31.18
  -1  -5  -3  658.28   27.98
  -1  -5  -3  650.88   27.83
  -1  -5  -4   22.59    4.05
  -1  -5  -4   25.89    3.72
  -1  -5  -4   25.29    2.09
  -1  -5  -5   95.21    8.02
  -1  -5  -5   87.04    6.88
  -1  -5  -5   84.04    4.59
  -1  -5  -6   18.82    2.19
  -1  -5  -6   25.26    2.44
  -1  -5  -6   19.31    2.40
  -1  -5  -6   21.18    2.34
  -1  -5  -6   21.24    1.92
  -1  -5  -6   19.62    2.51
  -1  -5  -6   16.48    2.46
  -1  -5  -6   18.36    1.96
  -1  -5  -7   22.48    2.74
  -1  -5  -7   19.90    2.68
  -1  -5  -7   21.33    2.26
  -1  -5  -7   21.49    2.46
  -1  -5  -7   18.64    2.40
  -1  -5  -7   20.61    2.13
  -1  -5  -8  194.04    9.64
  -1  -5  -8  169.77    9.45
  -1  -5  -8  187.05    9.93
  -1  -5  -8  180.34    9.97
  -1  -5  -8  180.80    9.64
  -1  -5  -8  186.80    9.21
  -1  -5  -8  215.30   14.65
  -1  -5  -8  192.73    9.39
  -1  -5  -8  187.98    9.07
  -1  -5  -9   21.84    2.90
  -1  -5  -9   28.13    3.02
  -1  -5  -9   24.57    2.91
  -1  -5  -9   22.53    3.22
  -1  -5  -9   21.58    3.18
  -1  -5  -9   21.22    2.46
  -1  -5  -9   24.43    3.33
  -1  -5  -9   19.26    2.34
  -1  -5  -9   19.25    5.49
  -1  -5  -9   18.92    2.88
  -1  -5 -10   44.45    4.03
  -1  -5 -10   33.62    3.33
  -1  -5 -10   40.40    3.54
  -1  -5 -10   31.66    3.67
  -1  -5 -10   31.79    2.83
  -1  -5 -11   29.51    3.48
  -1  -5 -11   26.65    2.95
  -1  -5 -11   26.57    2.86
  -1  -5 -11   26.55    3.60
  -1  -5 -11   27.29    2.50
  -1  -5 -12   15.93    2.63
  -1  -5 -12   16.76    2.83
  -1  -5 -12   18.79    2.28
  -1  -5 -13   -0.13    1.54
  -1  -5 -13    2.19    1.27
  -1  -6  10   85.72    4.72
   1   6  -9   28.62    2.42
   1   6  -9   32.03    2.28
  -1  -6   9   32.22    2.99
   1   6  -8  132.85    6.99
   1   6  -8  142.05    7.21
   1   6  -8  138.89    6.82
  -1  -6   8  138.38    7.72
   1   6  -7   93.94    5.54
   1   6  -7  113.72    5.64
  -1  -6   7  101.79    6.40
   1   6  -6    5.80    1.67
   1   6  -6    6.37    1.86
   1   6  -5    2.31    1.35
  -1  -6   5    4.53    2.15
   1   6  -5    6.07    1.74
  -1  -6   4   16.31    2.38
  -1  -6   4   10.65    2.41
  -1  -6   3   41.95    3.35
  -1  -6   3   36.07    2.82
  -1  -6   3   44.99    6.11
  -1  -6   3   35.44    2.86
  -1  -6   3   39.19    3.34
  -1  -6   2  427.32   19.60
  -1  -6   2  437.32   19.31
  -1  -6   2  420.52   19.46
  -1  -6   2  434.07   22.54
  -1  -6   2  451.73   19.41
  -1  -6   2  464.60   23.42
  -1  -6   1    3.14    1.53
  -1  -6   1    5.01    1.49
  -1  -6   1    6.58    1.59
  -1  -6   1   -0.47    2.54
  -1  -6   1    4.87    3.32
  -1  -6   0   14.09    2.02
  -1  -6   0   22.06    2.13
  -1  -6   0   15.56    1.97
  -1  -6   0   12.51    3.75
  -1  -6   0   19.29    3.93
  -1  -6   0   17.33    1.86
  -1  -6  -1  146.09    7.44
  -1  -6  -1  132.53    9.91
  -1  -6  -1  148.19    7.47
  -1  -6  -1  147.47    7.40
  -1  -6  -2    2.17    1.31
  -1  -6  -2    6.17    1.45
  -1  -6  -3  232.10   11.08
  -1  -6  -3  245.50   14.25
  -1  -6  -3  243.76   11.14
  -1  -6  -3  237.69   10.96
  -1  -6  -3  223.46   10.85
  -1  -6  -3  249.35   11.40
  -1  -6  -4  271.97   12.37
  -1  -6  -4  280.42   15.59
  -1  -6  -4  273.46   12.49
  -1  -6  -4  265.68   12.31
  -1  -6  -4  261.95   12.67
  -1  -6  -4  262.80   12.55
  -1  -6  -4  254.37   12.11
  -1  -6  -4  273.23   12.35
  -1  -6  -5   90.81    8.41
  -1  -6  -5   84.06    7.28
  -1  -6  -5   80.50    4.57
  -1  -6  -5   74.95    4.65
  -1  -6  -5   81.76    4.95
  -1  -6  -5   78.51    4.98
  -1  -6  -5   82.53    4.69
  -1  -6  -5   72.65    4.88
  -1  -6  -5   80.51    5.05
  -1  -6  -5   71.37    4.38
  -1  -6  -5   73.36    4.64
  -1  -6  -5   82.42    4.54
  -1  -6  -5   78.35    4.57
  -1  -6  -6  130.82   10.64
  -1  -6  -6  104.31    5.88
  -1  -6  -6  113.41    5.95
  -1  -6  -6  107.44    6.44
  -1  -6  -6  112.02    6.08
  -1  -6  -6  112.68    6.67
  -1  -6  -6  112.80    6.65
  -1  -6  -6  113.18    5.95
  -1  -6  -6  107.97    6.31
  -1  -6  -6  111.58    5.97
  -1  -6  -6  115.04    6.52
  -1  -6  -6  119.56    6.54
  -1  -6  -6  115.10    6.23
  -1  -6  -7    1.28    1.80
  -1  -6  -7    1.29    1.86
  -1  -6  -7    4.90    2.11
  -1  -6  -7    3.87    1.31
  -1  -6  -7    3.14    2.03
  -1  -6  -7    1.49    1.52
  -1  -6  -7    2.08    1.95
  -1  -6  -7   -0.78    3.61
  -1  -6  -7    1.55    1.88
  -1  -6  -7    1.84    1.63
  -1  -6  -8    4.83    2.26
  -1  -6  -8    1.90    1.60
  -1  -6  -8    3.41    2.12
  -1  -6  -8    1.65    1.89
  -1  -6  -8    1.99    1.56
  -1  -6  -8   -0.55    1.77
  -1  -6  -9   28.52    3.29
  -1  -6  -9   25.53    2.90
  -1  -6  -9   29.08    2.68
  -1  -6  -9   24.98    3.26
  -1  -6  -9   23.98    3.31
  -1  -6  -9   25.69    3.50
  -1  -6  -9   24.05    2.95
  -1  -6  -9   26.45    2.99
  -1  -6  -9   26.74    2.57
  -1  -6 -10    5.59    2.24
  -1  -6 -10    3.60    2.16
  -1  -6 -10    4.83    1.75
  -1  -6 -10    3.29    2.50
  -1  -6 -10    3.71    2.39
  -1  -6 -10    5.01    2.05
  -1  -6 -10    2.93    1.52
  -1  -6 -10    3.14    2.14
  -1  -6 -11   25.03    2.69
  -1  -6 -11   18.18    2.60
  -1  -6 -11   18.31    2.65
  -1  -6 -11   24.64    3.03
  -1  -6 -11   21.87    2.16
  -1  -6 -12    7.55    1.72
  -1  -6 -12    5.90    1.59
  -1  -7   9   31.17    2.59
  -1  -7   8   69.77    4.56
   1   7  -7  100.37    5.76
   1   7  -7  108.78    5.40
  -1  -7   6   34.39    3.66
   1   7  -6   37.55    2.80
  -1  -7   5  214.55   14.62
  -1  -7   5  190.09   10.26
   1   7  -5  200.43    9.47
  -1  -7   4   16.28    5.34
  -1  -7   4   10.17    2.50
  -1  -7   3    3.18    1.64
  -1  -7   3    5.11    2.14
  -1  -7   3    4.58    4.28
  -1  -7   2   24.54    3.00
  -1  -7   2   24.50    2.61
  -1  -7   2   26.06    2.80
  -1  -7   2   32.01    5.59
  -1  -7   2   26.52    2.71
  -1  -7   1    4.62    3.75
  -1  -7   1    9.15    1.97
  -1  -7   1    7.51    1.84
  -1  -7   1    5.12    1.89
  -1  -7   0   68.58    4.59
  -1  -7   0   67.98    4.36
  -1  -7   0   69.00    4.51
  -1  -7   0   66.49    7.08
  -1  -7   0   73.03    7.44
  -1  -7   0   66.64    4.49
  -1  -7   0   73.00    4.21
  -1  -7  -1   61.79    4.10
  -1  -7  -1   60.78    4.20
  -1  -7  -1   64.61    4.28
  -1  -7  -1   56.84    4.14
  -1  -7  -1   67.01    4.32
  -1  -7  -1   51.22    6.55
  -1  -7  -1   65.95    7.02
  -1  -7  -2  115.32    6.40
  -1  -7  -2  113.79    6.45
  -1  -7  -2  131.78    9.50
  -1  -7  -2  109.00    6.17
  -1  -7  -3   46.63    5.89
  -1  -7  -3   27.35    5.09
  -1  -7  -3   41.82    3.27
  -1  -7  -3   34.58    3.05
  -1  -7  -3   41.41    3.37
  -1  -7  -3   36.88    3.38
  -1  -7  -3   31.31    2.88
  -1  -7  -3   37.79    3.24
  -1  -7  -3   39.50    3.02
  -1  -7  -4   22.96    2.79
  -1  -7  -4   21.16    2.61
  -1  -7  -4   22.42    2.66
  -1  -7  -4   24.13    2.48
  -1  -7  -4   25.04    2.70
  -1  -7  -4   24.30    2.90
  -1  -7  -4   23.89    2.59
  -1  -7  -5   15.42    2.43
  -1  -7  -5   17.96    2.70
  -1  -7  -5   13.27    2.25
  -1  -7  -5   12.77    2.52
  -1  -7  -5   12.46    2.24
  -1  -7  -5   13.82    2.14
  -1  -7  -5   14.91    2.10
  -1  -7  -5   14.61    2.25
  -1  -7  -5   16.40    2.63
  -1  -7  -6  166.32    9.02
  -1  -7  -6  175.08    8.69
  -1  -7  -6  165.66    8.54
  -1  -7  -6  153.41    8.60
  -1  -7  -6  176.59    8.51
  -1  -7  -6  181.32    9.06
  -1  -7  -6  171.90    9.25
  -1  -7  -6  168.31    9.17
  -1  -7  -7   36.29    3.59
  -1  -7  -7   35.46    3.18
  -1  -7  -7   35.49    2.89
  -1  -7  -7   31.66    3.47
  -1  -7  -7   35.40    3.40
  -1  -7  -7   39.50    3.15
  -1  -7  -7   39.99    3.85
  -1  -7  -7   37.16    3.92
  -1  -7  -7   34.74    3.59
  -1  -7  -8    4.54    1.88
  -1  -7  -8    5.92    2.21
  -1  -7  -8    3.66    2.14
  -1  -7  -8    2.20    1.95
  -1  -7  -8    5.58    1.90
  -1  -7  -8    4.70    2.23
  -1  -7  -8    6.93    2.51
  -1  -7  -9   21.85    2.79
  -1  -7  -9   22.65    3.03
  -1  -7  -9   24.02    2.44
  -1  -7  -9   22.57    3.07
  -1  -7  -9   17.96    2.63
  -1  -7  -9   28.03    2.57
  -1  -7 -10   20.02    2.76
  -1  -7 -10   21.45    2.17
  -1  -7 -10   22.25    3.08
  -1  -7 -10   18.79    2.07
  -1  -7 -10   13.12    2.22
  -1  -7 -11   16.50    2.36
  -1  -7 -11   20.90    2.59
  -1  -7 -12    1.06    1.47
  -1  -8   7    0.99    1.59
  -1  -8   6    2.50    1.91
  -1  -8   5  133.10    7.55
   1   8  -5  139.36    6.75
   1   8  -4  185.73    8.54
  -1  -8   4  160.95    9.13
  -1  -8   4  178.51   13.19
  -1  -8   3   14.04    2.15
  -1  -8   3   17.95    2.68
  -1  -8   3   21.14    5.40
  -1  -8   2  136.08    7.14
  -1  -8   2  135.83    7.20
  -1  -8   2  120.24   10.60
  -1  -8   2  122.71    7.11
  -1  -8   1   -0.64    3.74
  -1  -8   1    5.50    2.01
  -1  -8   1    5.17    2.09
  -1  -8   1    3.86    1.75
  -1  -8   1    5.02    2.04
  -1  -8   0    5.83    2.06
  -1  -8   0    6.04    2.14
  -1  -8   0    5.04    2.13
  -1  -8   0    2.39    1.51
  -1  -8  -1  109.33    6.54
  -1  -8  -1  114.41    6.62
  -1  -8  -1  102.83    6.33
  -1  -8  -1  114.42    6.60
  -1  -8  -2   70.50    7.60
  -1  -8  -2   74.20    4.93
  -1  -8  -2   66.91    4.65
  -1  -8  -2   70.69    4.82
  -1  -8  -2   60.91    3.96
  -1  -8  -2   59.78    4.49
  -1  -8  -3  454.42   19.51
  -1  -8  -3  434.10   19.81
  -1  -8  -3  431.82   19.73
  -1  -8  -3  378.53   19.37
  -1  -8  -3  435.62   19.60
  -1  -8  -3  474.48   23.66
  -1  -8  -4   16.90    2.45
  -1  -8  -4   11.37    2.00
  -1  -8  -4   14.61    2.77
  -1  -8  -4   10.31    2.22
  -1  -8  -4   13.75    2.49
  -1  -8  -4   11.14    2.49
  -1  -8  -4   14.27    2.70
  -1  -8  -5    7.64    2.24
  -1  -8  -5    3.13    2.34
  -1  -8  -5    3.67    1.81
  -1  -8  -5    4.51    2.47
  -1  -8  -5    7.61    2.48
  -1  -8  -5    7.90    2.17
  -1  -8  -6   48.91    3.52
  -1  -8  -6   41.46    3.48
  -1  -8  -6   40.62    3.77
  -1  -8  -6   45.84    4.16
  -1  -8  -6   43.27    3.72
  -1  -8  -6   44.19    3.93
  -1  -8  -6   47.57    3.71
  -1  -8  -7   31.06    2.87
  -1  -8  -7   27.58    3.27
  -1  -8  -7   29.67    3.43
  -1  -8  -7   24.90    3.09
  -1  -8  -7   31.16    2.96
  -1  -8  -7   26.42    3.21
  -1  -8  -8   68.09    5.08
  -1  -8  -8   74.48    4.33
  -1  -8  -8   70.87    4.85
  -1  -8  -8   59.34    4.56
  -1  -8  -8   65.62    4.35
  -1  -8  -8   72.79    4.88
  -1  -8  -9    2.54    1.84
  -1  -8  -9    1.88    1.50
  -1  -8  -9    1.49    2.01
  -1  -8  -9    1.64    1.73
  -1  -8  -9    0.50    1.52
  -1  -8 -10    1.67    2.03
  -1  -8 -10    2.66    1.80
  -1  -8 -10    2.10    1.23
  -1  -8 -10    1.34    1.22
  -1  -9   5   79.33    4.76
  -1  -9   4    5.06    1.83
   1   9  -3    7.09    1.57
  -1  -9   3    4.17    1.83
  -1  -9   2   12.84    2.28
  -1  -9   2   18.57    2.27
  -1  -9   1    4.92    1.93
  -1  -9   1    5.52    3.89
  -1  -9   1    8.05    2.17
  -1  -9   0   95.58    8.88
  -1  -9   0   82.69    5.44
  -1  -9   0   84.40    5.09
  -1  -9   0   83.97    5.31
  -1  -9  -1    2.62    1.74
  -1  -9  -1    2.59    2.06
  -1  -9  -1    3.65    3.82
  -1  -9  -1    2.19    2.14
  -1  -9  -1   -0.13    1.62
  -1  -9  -2   65.46    4.75
  -1  -9  -2   66.93    4.64
  -1  -9  -2   69.85    7.47
  -1  -9  -2   65.47    4.80
  -1  -9  -2   59.53    3.81
  -1  -9  -3   83.97    5.60
  -1  -9  -3   82.32    5.52
  -1  -9  -4   50.16    4.25
  -1  -9  -4   54.99    4.12
  -1  -9  -4   54.92    4.45
  -1  -9  -4   55.62    4.43
  -1  -9  -5    6.82    2.15
  -1  -9  -5    4.41    2.29
  -1  -9  -5    7.08    2.35
  -1  -9  -5    3.86    2.09
  -1  -9  -5    5.73    2.43
  -1  -9  -6    1.95    2.12
  -1  -9  -6    2.00    2.32
  -1  -9  -6    0.92    2.05
  -1  -9  -7    0.62    1.85
  -1  -9  -7    0.28    1.73
  -1  -9  -7    1.66    1.89
  -1  -9  -7    0.75    2.26
  -1  -9  -8    3.65    2.03
  -1  -9  -8    2.82    1.69
  -1  -9  -8    2.80    1.56
  -1  -9  -8    2.53    2.16
  -1  -9  -9   -0.85    1.79
  -1 -10   4   22.65    2.00
  -1 -10   3    0.10    1.35
  -1 -10   2    8.02    1.75
  -1 -10   1    1.59    1.51
  -1 -10   1    2.44    1.41
  -1 -10   0    1.85    1.46
  -1 -10   0   -0.40    1.52
  -1 -10  -1   16.37    2.35
  -1 -10  -2    1.71    1.73
  -1 -10  -2   -0.97    1.88
  -1 -10  -2    0.97    1.90
  -1 -10  -3   77.75    4.90
  -1 -10  -3   76.48    4.99
  -1 -10  -4   29.66    2.97
  -1 -10  -4   30.87    3.16
  -1 -10  -4   31.95    3.21
  -1 -10  -5    2.10    1.96
  -1 -10  -5   -0.64    1.86
  -1 -10  -5    2.64    1.95
  -1 -10  -6   29.41    2.93
  -1 -10  -6   28.52    2.83
  -1 -10  -6   28.67    2.96
  -1 -10  -7    9.32    2.03
  -1 -10  -7   10.30    2.09
  -1 -10  -7    7.57    1.73
  -1 -10  -8    5.88    1.71
  -1 -11   0    8.53    1.76
  -1 -11  -1    7.34    1.31
  -1 -11  -1   10.10    1.92
  -1 -11  -2    6.54    1.45
  -1 -11  -3    5.94    1.53
  -1 -11  -4    0.11    1.31
  -1 -11  -4    1.38    1.47
  -1 -11  -5    1.63    1.35
  -1 -11  -5    0.61    1.27
   2 -11  -3    3.30    1.56
   2 -11  -3    2.61    1.15
   2 -11  -2    0.69    1.36
   2 -11  -2    0.23    0.95
   2 -11  -1   30.96    2.52
   2 -10  -7    8.32    1.72
   2 -10  -7   13.92    1.61
   2 -10  -6    2.05    1.63
   2 -10  -6    0.81    1.67
   2 -10  -6    3.60    1.38
   2 -10  -5    6.96    1.62
   2 -10  -5    4.15    1.89
   2 -10  -5    5.84    2.08
   2 -10  -5    3.24    1.56
   2 -10  -4   52.29    3.88
   2 -10  -4   53.85    3.71
   2 -10  -3   34.07    3.05
   2 -10  -2  101.22    5.80
   2 -10  -2  102.09    6.15
   2 -10  -2  103.63    5.93
   2 -10  -1   56.11    4.14
   2 -10  -1   52.53    3.89
   2 -10  -1   50.17    3.57
   2 -10  -1   53.36    3.53
   2 -10   0   16.99    2.34
   2 -10   0   16.09    2.13
   2 -10   0   20.63    2.72
   2 -10   1   53.70    3.88
   2 -10   1   48.60    3.50
   2 -10   1   50.25    3.46
   2 -10   2   13.48    2.21
   2 -10   2   10.76    1.71
   2 -10   2   13.66    1.90
   2 -10   3   14.41    1.95
   2 -10   4   53.78    3.15
  -2  10  -4   48.33    3.11
   2 -10   4   53.10    3.10
   2  -9  -9   25.98    2.19
   2  -9  -9   19.64    1.97
   2  -9  -8    3.79    1.68
   2  -9  -8    3.79    1.71
   2  -9  -8    3.98    1.61
   2  -9  -8    3.11    1.48
   2  -9  -7    9.18    2.02
   2  -9  -7    9.74    2.16
   2  -9  -7    5.03    1.73
   2  -9  -7    8.48    1.92
   2  -9  -6   29.33    2.73
   2  -9  -6   36.61    3.43
   2  -9  -6   35.65    3.00
   2  -9  -6   32.63    2.87
   2  -9  -5   -0.46    1.76
   2  -9  -5    3.30    2.43
   2  -9  -5   -0.15    1.79
   2  -9  -5   -1.44    1.56
   2  -9  -4    7.68    2.45
   2  -9  -4    8.26    2.01
   2  -9  -4    9.50    2.09
   2  -9  -4   10.28    2.28
   2  -9  -3    1.04    1.59
   2  -9  -3    3.02    2.04
  -2   9   3    2.86    3.74
   2  -9  -2   18.18    2.91
  -2   9   2   15.87    4.70
   2  -9  -2   21.19    2.51
   2  -9  -2   24.35    3.27
   2  -9  -1  104.01    5.95
   2  -9  -1  103.67    6.21
   2  -9  -1   99.06    6.43
   2  -9   0   90.89    5.55
   2  -9   0   92.59    5.71
   2  -9   1  103.43    6.08
   2  -9   1  106.70    6.18
   2  -9   2   11.64    2.18
   2  -9   3    2.57    1.56
   2  -9   3    2.30    1.89
   2  -9   4  108.17    5.94
   2  -9   5    3.54    1.49
  -2   9  -5    4.35    1.62
   2  -9   6    1.99    1.15
  -2   9  -6    1.56    1.15
   2  -8 -10   44.99    3.18
   2  -8 -10   46.26    3.00
   2  -8  -9   72.63    4.75
   2  -8  -9   83.31    4.66
   2  -8  -8    4.98    2.06
   2  -8  -8    3.51    1.99
   2  -8  -8    5.48    2.16
   2  -8  -8    1.18    1.80
   2  -8  -8    4.04    1.88
   2  -8  -7   42.18    3.84
   2  -8  -7   46.59    3.83
   2  -8  -7   48.24    3.72
   2  -8  -7   50.69    3.75
   2  -8  -6   15.13    2.53
   2  -8  -6   18.74    2.31
   2  -8  -6   22.27    2.99
   2  -8  -6   17.28    2.62
   2  -8  -6   22.36    2.68
   2  -8  -5    3.01    1.88
   2  -8  -5    5.73    1.84
  -2   8   5    2.72    3.56
   2  -8  -5    3.42    1.90
   2  -8  -5    4.75    2.45
   2  -8  -5    4.50    1.94
   2  -8  -5    6.08    2.20
   2  -8  -4  160.84    8.17
  -2   8   4  140.47   11.75
   2  -8  -4  150.23    8.22
   2  -8  -4  163.57    8.64
   2  -8  -4  147.86    7.89
   2  -8  -4  156.17    8.10
   2  -8  -3   10.44    2.77
  -2   8   3   14.21    4.89
   2  -8  -3   12.38    2.19
   2  -8  -3   12.41    2.09
   2  -8  -3    7.02    2.29
   2  -8  -2   12.46    2.25
  -2   8   2   11.35    4.27
   2  -8  -2    8.18    1.94
   2  -8  -1   22.96    4.51
   2  -8  -1   30.96    3.12
   2  -8  -1   25.52    2.61
   2  -8   0    6.19    2.21
   2  -8   0    1.96    2.08
   2  -8   0   10.69    3.71
  -2   8   0    1.39    3.59
   2  -8   1   20.97    2.80
   2  -8   1   23.97    2.88
   2  -8   1   25.45    4.71
   2  -8   2   11.33    2.36
  -2   8  -2    6.60    3.74
   2  -8   2   11.69    3.75
   2  -8   3   69.42    4.76
  -2   8  -3   68.54    7.46
   2  -8   3   67.16    4.49
   2  -8   4  126.61    6.98
  -2   8  -5   10.53    2.31
   2  -8   5   11.13    2.20
  -2   8  -6   27.60    2.72
   2  -8   6   31.35    2.70
   2  -8   7   12.44    1.68
  -2   8  -7   13.68    1.73
   2  -7 -11    7.54    1.45
   2  -7 -10    2.44    1.80
   2  -7 -10    2.51    1.65
   2  -7  -9    4.26    1.91
   2  -7  -9    3.80    1.66
   2  -7  -9    6.78    2.36
   2  -7  -9    5.04    1.91
   2  -7  -8    2.58    2.05
   2  -7  -8    0.73    2.12
   2  -7  -8    1.34    2.09
   2  -7  -7  223.33   10.54
   2  -7  -7  237.63   10.53
   2  -7  -7  208.51   10.69
   2  -7  -7  219.44   10.77
   2  -7  -6  116.70    6.55
   2  -7  -6  121.95    6.91
   2  -7  -6  113.32    6.93
   2  -7  -6  123.18    6.72
   2  -7  -6  116.98    6.34
  -2   7   6  111.90    9.72
   2  -7  -5   42.53    3.55
   2  -7  -5   37.61    3.15
   2  -7  -5   41.06    3.63
   2  -7  -5   45.99    3.47
   2  -7  -4    8.63    2.19
   2  -7  -4   10.26    1.92
   2  -7  -4   10.06    2.09
  -2   7   4   12.15    4.20
  -2   7   3   10.81    4.33
   2  -7  -3   16.45    2.18
   2  -7  -3   16.01    2.35
   2  -7  -3   17.63    2.24
   2  -7  -3   17.15    2.30
   2  -7  -3   15.46    2.48
  -2   7   2  182.95   13.14
   2  -7  -2  191.12    9.37
   2  -7  -2  194.49    9.44
   2  -7  -1  205.11   12.05
   2  -7  -1  191.15    9.31
   2  -7  -1  178.70   11.19
   2  -7  -1  180.38    8.95
   2  -7  -1  186.67    9.40
  -2   7   1  163.91   12.53
   2  -7   0    2.33    3.28
   2  -7   0    1.31    1.81
  -2   7   0    3.10    3.29
   2  -7   0   -0.45    2.60
   2  -7   0    1.19    1.83
   2  -7   1   34.76    5.26
  -2   7  -1   34.02    5.58
   2  -7   1   34.62    5.04
   2  -7   2    6.48    3.58
  -2   7  -2    6.74    3.77
   2  -7   2   11.27    3.63
   2  -7   2    8.58    2.24
  -2   7  -3    7.76    3.64
   2  -7   3    9.69    1.95
   2  -7   3    9.28    3.58
   2  -7   3    7.99    2.37
   2  -7   4    9.39    2.59
  -2   7  -4    5.49    3.15
   2  -7   4   12.04    3.77
  -2   7  -6   65.94    4.16
   2  -7   6   67.41    4.47
   2  -7   6   70.66    5.00
  -2   7  -6   81.67    4.83
  -2   7  -7    6.19    1.54
  -2   7  -7    5.73    1.87
   2  -7   7    2.48    1.61
  -2   7  -8   30.19    3.07
  -2   7  -8   27.79    2.23
   2  -7   8   22.37    2.12
  -2   7  -9   73.29    4.35
   2  -6 -12    7.56    1.46
   2  -6 -11   12.99    2.13
   2  -6 -10   20.77    2.51
   2  -6 -10   21.17    2.59
   2  -6  -9   53.80    3.88
   2  -6  -9   49.38    3.84
   2  -6  -9   57.69    3.92
   2  -6  -8    2.22    2.05
   2  -6  -8    0.20    1.98
   2  -6  -8    2.08    1.94
   2  -6  -7   17.84    2.63
   2  -6  -7   14.35    2.71
   2  -6  -7   15.25    2.37
   2  -6  -7   15.95    2.33
   2  -6  -7   13.04    2.52
  -2   6   6   15.38    3.75
   2  -6  -6   10.15    2.19
   2  -6  -6    7.91    1.95
   2  -6  -6   10.80    2.15
   2  -6  -6    8.26    2.15
  -2   6   5   18.49    4.20
   2  -6  -5   17.34    2.41
   2  -6  -5   20.51    2.34
   2  -6  -5   23.72    2.31
   2  -6  -5   21.57    2.42
   2  -6  -5   18.26    2.58
  -2   6   4  165.44   11.08
   2  -6  -4  141.01    7.56
   2  -6  -4  152.60    7.56
   2  -6  -4  149.92    7.57
   2  -6  -4  145.68    7.82
   2  -6  -4  146.83    7.47
   2  -6  -3    2.48    1.66
   2  -6  -3    3.21    1.60
  -2   6   3    3.19    3.26
   2  -6  -3    3.24    1.49
   2  -6  -3    1.10    1.37
   2  -6  -3    3.42    1.35
   2  -6  -3   -0.51    2.56
   2  -6  -3    2.58    1.39
   2  -6  -2  391.44   18.70
   2  -6  -2  348.01   17.54
  -2   6   2  337.33   19.39
   2  -6  -2  373.25   15.90
   2  -6  -2  346.84   16.01
   2  -6  -2  338.43   15.75
   2  -6  -1  142.28    8.85
   2  -6  -1  141.84    9.17
   2  -6  -1  131.72    7.08
   2  -6  -1  150.58    7.07
  -2   6   1  154.58   10.45
   2  -6  -1  127.22    6.77
   2  -6  -1  133.39   10.00
   2  -6   0    7.76    2.99
   2  -6   0    3.74    1.50
   2  -6   0    4.07    2.75
   2  -6   0    4.26    1.74
   2  -6   0    3.53    2.44
  -2   6  -1  427.20   22.30
   2  -6   1  413.23   18.66
   2  -6   1  397.08   21.98
   2  -6   1  457.22   21.56
   2  -6   1  406.26   21.32
   2  -6   2   93.51    7.75
  -2   6  -2  100.35    8.33
   2  -6   2   86.89    5.62
   2  -6   2   99.42    7.85
   2  -6   2   99.60    5.41
  -2   6  -3   20.22    4.38
   2  -6   3   22.92    4.35
   2  -6   3   26.31    2.77
   2  -6   4   16.60    4.16
  -2   6  -4   19.57    3.94
   2  -6   4   24.20    4.68
   2  -6   5    2.09    2.33
   2  -6   5    3.18    3.50
   2  -6   6   28.14    3.33
  -2   6  -6   21.30    2.79
   2  -6   6   25.46    5.01
  -2   6  -7  121.01    6.81
   2  -6   7  134.49    7.36
   2  -6   8    9.67    2.27
  -2   6  -8    9.91    1.93
   2  -6   8    5.36    1.67
  -2   6  -9   10.86    2.43
  -2   6  -9   10.17    1.81
  -2   6 -10   11.41    1.58
  -2   6 -10    8.82    1.88
   2  -5 -12   19.21    2.10
   2  -5 -12   21.65    1.89
   2  -5 -11   22.29    2.63
   2  -5 -11   23.93    2.40
   2  -5 -10   61.11    4.54
   2  -5 -10   63.20    4.12
   2  -5 -10   71.55    4.54
   2  -5 -10   66.03    4.97
   2  -5 -10   64.10    4.34
   2  -5  -9   98.32    6.34
   2  -5  -9  113.43    6.85
   2  -5  -9  124.00    6.38
   2  -5  -9  121.99    6.65
   2  -5  -9  119.45    7.24
   2  -5  -9  122.26    6.63
   2  -5  -8    0.18    1.78
   2  -5  -8    1.94    1.60
   2  -5  -8    1.13    1.89
   2  -5  -8    1.95    1.79
   2  -5  -7  111.62    6.31
   2  -5  -7  117.39    6.73
   2  -5  -7  111.59    6.51
   2  -5  -7  113.54    6.05
   2  -5  -7  112.04    6.41
   2  -5  -6   23.67    2.55
   2  -5  -6   23.43    2.48
  -2   5   6   24.10    4.04
   2  -5  -6   25.59    2.35
   2  -5  -6   21.33    2.41
   2  -5  -6   20.46    2.61
   2  -5  -5    4.31    1.46
   2  -5  -5    4.40    1.61
   2  -5  -5    2.76    1.40
   2  -5  -5    1.64    1.48
   2  -5  -4  315.85   17.41
  -2   5   4  349.78   18.02
   2  -5  -3   18.36    2.37
   2  -5  -3   14.46    1.67
   2  -5  -3   15.86    3.28
  -2   5   3   16.35    3.53
   2  -5  -2  212.82   11.53
   2  -5  -2  221.85   10.24
   2  -5  -2  234.35   12.25
  -2   5   2  227.06   13.12
   2  -5  -1  118.06    5.89
   2  -5  -1  109.66    7.27
   2  -5  -1  114.84    7.49
   2  -5  -1  117.75    8.44
   2  -5   0  112.82    7.66
   2  -5   0  125.23    8.71
   2  -5   0  116.34    7.57
   2  -5   1 1357.90   58.61
   2  -5   1 1278.73   58.78
   2  -5   1 1380.89   56.57
   2  -5   1 1305.41   59.38
  -2   5  -1 1310.30   59.49
   2  -5   2   88.99    6.68
  -2   5  -2   87.76    6.98
   2  -5   2   79.22    4.73
   2  -5   2   77.47    6.75
  -2   5  -3  208.00   12.83
   2  -5   3  223.18   13.30
   2  -5   3  213.82   12.79
   2  -5   3  232.07   12.88
   2  -5   4  426.82   18.96
  -2   5  -4  391.33   21.14
   2  -5   4  439.10   22.15
   2  -5   5   70.78    4.67
  -2   5  -5   57.68    5.60
   2  -5   5   73.67    6.99
   2  -5   6  494.66   22.54
  -2   5  -6  505.20   22.24
   2  -5   7    3.52    2.36
  -2   5  -7    4.80    1.86
   2  -5   8    4.70    2.20
  -2   5  -8    3.29    1.79
   2  -5   9   54.31    3.92
  -2   5  -9   54.87    4.38
  -2   5  -9   45.72    3.27
  -2   5 -10   15.39    2.56
  -2   5 -10   16.06    2.09
  -2   5 -11   13.36    1.91
  -2   5 -11   10.31    1.57
   2  -4 -11    5.90    1.83
   2  -4 -11    5.66    1.94
   2  -4 -11    6.64    1.69
   2  -4 -10    2.43    1.82
   2  -4 -10    3.38    2.12
   2  -4 -10    1.58    1.58
   2  -4 -10    2.64    2.38
   2  -4 -10    1.64    1.99
   2  -4  -9   39.54    3.56
   2  -4  -9   34.99    2.98
   2  -4  -9   41.77    3.50
   2  -4  -9   38.50    3.72
   2  -4  -9   36.36    3.19
   2  -4  -9   33.42    3.18
   2  -4  -8   26.67    3.33
   2  -4  -8   28.32    2.91
   2  -4  -8   32.63    3.24
   2  -4  -8   32.67    3.48
   2  -4  -8   30.31    3.04
   2  -4  -7   72.26    4.59
   2  -4  -7   59.11    4.15
   2  -4  -7   64.42    3.91
   2  -4  -7   62.10    4.42
   2  -4  -7   62.19    4.17
   2  -4  -6   28.89    2.53
  -2   4   6   25.27    3.56
   2  -4  -6   29.44    2.30
  -2   4   5  233.81   12.42
   2  -4  -5  201.72   11.75
  -2   4   4 1136.69   49.12
   2  -4  -4 1073.80   48.67
  -2   4   3   49.66    4.87
   2  -4  -3   57.21    3.15
   2  -4  -3   52.10    4.83
  -2   4   2  100.72    7.31
   2  -4  -2   96.13    6.97
   2  -4  -2  111.40    5.30
  -2   4   1   33.87    3.98
   2  -4  -1   27.89    2.05
   2  -4  -1   26.78    3.02
   2  -4   0  253.81   12.71
   2  -4   0  252.15   13.47
   2  -4   1  101.26    6.41
   2  -4   1  102.52    5.18
   2  -4   1   96.72    7.03
  -2   4  -1   97.41    7.00
   2  -4   2  274.57   14.16
   2  -4   2  279.50   14.65
  -2   4  -2  288.49   14.85
   2  -4   3  703.84   32.86
  -2   4  -3  702.54   32.64
   2  -4   3  727.35   30.47
   2  -4   3  678.27   32.44
   2  -4   4  786.34   34.63
   2  -4   4  722.44   33.55
   2  -4   4  777.16   31.72
  -2   4  -4  707.11   31.15
  -2   4  -4  736.77   33.73
  -2   4  -5   15.04    1.69
  -2   4  -5   13.75    2.67
   2  -4   5   13.63    3.73
   2  -4   5   16.54    2.23
  -2   4  -6    3.66    1.50
   2  -4   6    9.18    2.07
  -2   4  -6    6.17    1.82
   2  -4   6    6.14    2.91
  -2   4  -7  122.03    6.46
   2  -4   7  114.39    6.66
  -2   4  -7  117.41    6.28
   2  -4   8  180.99    9.23
  -2   4  -8  175.18    8.78
   2  -4   9  182.63    9.28
  -2   4  -9  176.46    8.76
  -2   4  -9  196.78    9.95
  -2   4 -10  104.03    5.96
  -2   4 -10  104.00    6.45
  -2   4 -11   32.95    2.85
  -2   4 -11   40.44    3.29
   2  -3 -12   46.88    2.95
   2  -3 -11    3.81    1.62
   2  -3 -11    4.90    1.76
   2  -3 -11    5.62    1.59
   2  -3 -10   16.93    2.91
   2  -3 -10   14.22    2.59
   2  -3 -10   18.05    1.93
   2  -3 -10   20.36    2.29
   2  -3 -10   18.03    2.45
   2  -3  -9   96.84    5.40
   2  -3  -9   87.32    5.64
   2  -3  -9  100.53    6.22
   2  -3  -9   96.03    5.80
   2  -3  -9  106.44    6.57
   2  -3  -9   97.02    5.11
   2  -3  -8    3.17    2.11
   2  -3  -8    2.51    1.88
   2  -3  -8    1.86    1.41
   2  -3  -8    2.03    1.17
   2  -3  -7  239.89   11.56
   2  -3  -7  240.13   11.68
   2  -3  -7  238.10   10.94
   2  -3  -7  228.29   10.90
   2  -3  -7  242.67   10.64
   2  -3  -6    9.93    1.84
   2  -3  -6   11.99    1.53
   2  -3  -5    4.04    1.63
   2  -3  -5    4.89    1.13
  -2   3   5    8.33    2.17
   2  -3  -4  364.33   17.81
  -2   3   4  386.91   18.27
   2  -3  -3  511.62   24.12
  -2   3   3  546.02   24.51
   2  -3  -2 1377.35   59.16
  -2   3   2 1372.26   59.40
   2  -3  -1  190.46    9.55
  -2   3   1  197.65   10.60
   2  -3   0   59.72    3.98
   2  -3   1  234.55   11.82
   2  -3   1  223.26   11.03
  -2   3  -1  224.98   11.92
  -2   3  -2  286.35   14.19
   2  -3   2  271.32   13.85
   2  -3   3  213.12    9.63
   2  -3   3  203.66   10.99
  -2   3  -3  205.60   11.19
   2  -3   4  357.56   17.45
   2  -3   4  382.81   16.21
  -2   3  -4  352.94   15.82
   2  -3   4  381.71   18.43
  -2   3  -4  370.87   17.70
  -2   3  -5   13.76    2.45
   2  -3   5   16.35    1.87
   2  -3   5   17.33    3.20
  -2   3  -5   11.55    1.51
  -2   3  -6  152.05    7.54
   2  -3   6  159.10    7.68
  -2   3  -6  142.21    7.37
   2  -3   6  160.54    9.91
   2  -3   7   69.32    4.39
   2  -3   7   68.23    6.29
  -2   3  -7   67.16    4.18
  -2   3  -7   67.77    4.20
  -2   3  -8    8.18    1.98
   2  -3   8    8.10    1.93
  -2   3  -8    6.39    1.87
   2  -3   9   25.26    2.75
  -2   3  -9   25.98    3.45
  -2   3  -9   22.49    2.36
   2  -3  10    5.96    1.78
  -2   3 -10    7.02    2.64
  -2   3 -11   51.89    4.14
  -2   3 -12   69.66    4.18
  -2   3 -12   76.93    4.51
   2  -2 -13    3.06    1.41
   2  -2 -11    6.20    1.37
   2  -2 -11    4.66    1.60
   2  -2 -10   48.48    3.19
   2  -2 -10   58.52    4.27
   2  -2 -10   51.63    3.44
   2  -2 -10   45.02    3.51
   2  -2 -10   47.95    3.44
   2  -2  -9    3.77    1.59
   2  -2  -9    6.98    1.87
   2  -2  -9    4.81    1.86
   2  -2  -9    5.49    1.60
   2  -2  -9    7.16    2.64
   2  -2  -9    4.93    2.04
   2  -2  -8    2.25    1.39
   2  -2  -8    1.97    1.81
   2  -2  -8    2.85    1.59
   2  -2  -8    1.02    1.15
   2  -2  -7  411.01   19.07
   2  -2  -7  434.04   18.59
   2  -2  -6  443.55   19.15
   2  -2  -5  233.13   10.46
  -2   2   5  219.27   10.75
   2  -2  -5  196.04    9.27
  -2   2   4  393.95   18.41
  -2   2   3  455.13   20.92
  -2   2   2   14.42    2.28
  -2   2   1 2718.59  114.09
   2  -2   0 1522.63   64.98
  -2   2   0 1639.94   66.33
   2  -2   1 1021.71   44.60
  -2   2  -1 1140.34   45.86
  -2   2  -2  287.66   13.94
  -2   2  -3  120.96    6.96
  -2   2  -4 1056.45   44.43
  -2   2  -4 1051.87   45.80
   2  -2   4 1091.30   45.72
   2  -2   5   29.70    2.67
  -2   2  -5   31.27    2.15
   2  -2   5   33.58    3.65
  -2   2  -5   28.02    2.22
   2  -2   5   32.94    2.30
  -2   2  -5   25.59    2.67
   2  -2   6  314.10   15.80
  -2   2  -6  307.98   13.60
   2  -2   6  301.52   13.68
  -2   2  -6  301.06   13.64
   2  -2   7  126.16    8.29
  -2   2  -7  125.21    6.43
  -2   2  -7  123.45    6.37
   2  -2   7  127.20    6.48
  -2   2  -8    8.88    2.42
  -2   2  -8    5.32    1.77
  -2   2  -8    6.42    1.68
   2  -2   8    9.61    1.78
  -2   2  -8    6.05    1.74
  -2   2  -9    9.56    2.39
  -2   2  -9    1.50    2.36
  -2   2  -9    6.56    1.65
  -2   2  -9    8.67    2.02
   2  -2   9    6.02    1.70
  -2   2 -10   50.15    4.03
  -2   2 -10   55.42    4.58
  -2   2 -11   61.48    4.09
  -2   2 -11   59.64    4.49
  -2   2 -12   63.99    4.22
  -2   2 -12   54.08    3.72
  -2   2 -13    3.48    1.09
   2  -1 -13    3.16    1.39
   2  -1 -12   37.03    2.57
   2  -1 -11  107.68    5.81
   2  -1 -11   96.56    5.38
   2  -1 -11  101.66    5.40
   2  -1 -10   72.05    4.39
   2  -1 -10   73.43    4.52
   2  -1 -10   70.87    4.39
   2  -1 -10   78.63    4.94
   2  -1  -9   69.54    4.26
   2  -1  -9   60.37    4.18
   2  -1  -9   77.72    5.49
   2  -1  -9   78.06    4.81
   2  -1  -8  255.25   11.80
   2  -1  -8  247.77   12.73
   2  -1  -8  268.14   12.37
   2  -1  -7 1343.54   55.14
   2  -1  -7 1299.33   55.93
  -2   1   7 1292.97   55.17
   2  -1  -6    9.22    1.36
   2  -1  -5  362.50   15.40
   2  -1  -5  360.02   14.83
  -2   1   4  988.33   42.56
  -2   1   3   18.49    2.33
  -2   1   2 4659.48  193.56
  -2   1   1 2631.82  110.05
  -2   1   0 2105.81   88.38
   2  -1   1  468.80   21.24
  -2   1  -2  245.61   11.80
  -2   1  -3   81.30    4.93
  -2   1  -4    6.15    1.59
  -2   1  -5 1221.35   49.65
   2  -1   5 1203.33   50.07
  -2   1  -5 1081.14   50.07
  -2   1  -5 1206.48   49.59
  -2   1  -6  139.26    6.37
   2  -1   6  133.00    6.61
   2  -1   6  143.06    8.16
  -2   1  -6  140.95    6.75
  -2   1  -6  143.24    6.73
  -2   1  -7    4.64    1.13
   2  -1   7    6.46    2.08
   2  -1   7    5.19    1.24
  -2   1  -7    4.90    1.45
  -2   1  -8  115.37    6.50
  -2   1  -8  110.01    5.51
  -2   1  -8  107.31    5.71
  -2   1  -8  114.27    6.55
  -2   1  -8  101.23    8.54
  -2   1  -9   65.56    5.12
  -2   1  -9   81.12    4.43
  -2   1  -9   77.42    7.57
  -2   1  -9   74.79    5.29
  -2   1  -9   75.24    4.23
  -2   1 -10    5.63    2.14
  -2   1 -10    3.23    2.48
  -2   1 -10    6.02    2.47
  -2   1 -11  101.79    5.80
  -2   1 -11  110.83    6.51
  -2   1 -12   34.10    2.86
  -2   1 -12   31.58    3.14
  -2   1 -13    6.76    1.25
   2   0 -13    5.80    1.44
   2   0 -12  134.66    6.67
   2   0 -11   10.16    1.82
   2   0 -11    9.90    2.10
   2   0 -10   75.09    4.50
   2   0 -10   73.09    4.66
   2   0 -10   71.35    4.66
   2   0  -9    8.26    2.11
   2   0  -9    3.89    1.91
  -2   0   9    3.52    1.71
  -2   0   8   29.89    2.64
   2   0  -8   30.82    2.68
   2   0  -8   30.73    3.26
  -2   0   7   22.32    2.06
  -2   0   7   22.78    2.17
   2   0  -7   21.26    2.57
  -2   0   6  143.20    6.91
   2   0  -5  186.77    8.42
  -2   0   4  737.36   31.85
  -2   0   3    4.19    1.44
   2   0  -3    5.77    1.63
   2   0  -2    8.01    1.78
  -2   0   2    7.51    1.73
   2   0  -1  263.06   12.66
  -2   0   0 5486.05  227.41
   2   0   1 9999.00  413.17
   2   0   2 3858.21  160.58
  -2   0  -3  971.25   40.93
   2   0   3  937.55   41.12
  -2   0  -4 1421.97   59.43
   2   0   4 1391.94   59.67
  -2   0  -5  344.63   14.19
  -2   0  -5  298.42   14.52
  -2   0  -6  361.52   15.76
  -2   0  -6  376.36   15.80
  -2   0  -6  346.64   15.47
   2   0   6  370.81   16.78
  -2   0  -7   21.19    1.96
  -2   0  -7   21.66    1.97
  -2   0  -7   17.34    1.68
  -2   0  -8   25.78    2.97
  -2   0  -8   28.51    2.41
  -2   0  -8   28.77    2.50
  -2   0  -8   28.74    2.29
  -2   0  -8   21.24    4.54
  -2   0  -9  140.24    7.24
  -2   0  -9  143.33    8.18
  -2   0  -9  156.06    7.67
  -2   0  -9  152.90   11.30
  -2   0  -9  154.60    8.38
  -2   0 -10    2.05    1.97
  -2   0 -10    3.45    2.37
  -2   0 -10   -1.66    2.40
  -2   0 -11   30.91    2.87
  -2   0 -11   26.39    3.51
  -2   0 -11   24.88    3.47
  -2   0 -12   40.72    3.78
  -2   0 -12   38.22    3.08
  -2   0 -12   38.60    2.99
  -2   0 -13    0.44    1.71
   2   1 -12   60.65    3.55
   2   1 -12   54.29    3.51
   2   1 -11   -1.49    1.73
   2   1 -11    1.96    1.57
   2   1 -10  159.77    8.10
   2   1  -9  144.56    7.45
   2   1  -8    3.08    1.73
  -2  -1   8    4.48    1.72
   2   1  -8    3.96    1.87
  -2  -1   8    4.55    1.72
   2   1  -7  225.82   10.95
  -2  -1   7  220.60   10.48
   2   1  -7  217.39   10.22
   2   1  -7  224.32   10.31
  -2  -1   7  217.98   10.53
  -2  -1   6  141.81    6.97
   2   1  -6  135.78    6.70
  -2  -1   6  143.57    7.08
   2   1  -5   77.04    4.49
  -2  -1   5   83.23    4.36
   2   1  -4  159.88    8.35
  -2  -1   4  163.33    8.13
  -2  -1   3    8.41    1.66
  -2  -1   2  286.14   13.54
  -2  -1   1  520.56   23.17
  -2  -1   0  281.40   13.32
  -2  -1  -1 1252.05   52.29
  -2  -1  -2  528.31   23.44
  -2  -1  -3   21.38    2.33
   2   1   4 1306.87   54.76
  -2  -1  -4 1259.55   54.30
   2   1   5  111.85    6.71
  -2  -1  -5  133.17    6.49
  -2  -1  -6 1065.63   46.55
  -2  -1  -6 1025.00   43.00
  -2  -1  -6 1024.52   42.91
  -2  -1  -6 1009.30   42.97
  -2  -1  -7  301.39   17.76
  -2  -1  -7  333.89   14.52
  -2  -1  -7  327.47   14.41
  -2  -1  -7  318.58   14.39
  -2  -1  -8    4.63    1.97
  -2  -1  -8    4.93    1.55
  -2  -1  -8    6.40    3.41
  -2  -1  -8    4.98    1.48
  -2  -1  -9  190.00    9.38
  -2  -1  -9  207.53    9.80
  -2  -1  -9  214.69   10.66
  -2  -1  -9  194.08   13.88
  -2  -1 -10   31.41    3.88
  -2  -1 -10   27.31    5.53
  -2  -1 -10   38.13    3.83
  -2  -1 -10   29.11    2.82
  -2  -1 -11    3.71    2.47
  -2  -1 -11    3.89    1.46
  -2  -1 -11    5.62    1.79
  -2  -1 -12    6.90    2.57
  -2  -1 -12    4.18    1.50
  -2  -1 -12    2.24    1.88
  -2  -1 -13    0.17    1.92
  -2  -1 -13    0.47    1.54
  -2  -1 -13    1.72    1.38
   2   2 -12   10.52    1.56
   2   2 -12    8.19    1.49
   2   2 -11   32.04    2.64
  -2  -2  11   26.85    2.53
   2   2 -11   28.67    2.72
  -2  -2  10   12.70    2.44
   2   2 -10   17.61    2.38
   2   2  -9  351.88   16.19
   2   2  -9  353.33   15.96
  -2  -2   8  133.16    7.10
   2   2  -8  127.11    6.83
   2   2  -8  125.16    6.68
  -2  -2   7  466.77   21.20
   2   2  -7  469.32   20.88
  -2  -2   7  489.10   21.31
   2   2  -7  480.54   20.79
  -2  -2   6  228.92   11.05
  -2  -2   6  251.31   11.23
   2   2  -6  244.15   10.77
   2   2  -6  219.06   10.61
   2   2  -5  220.38    9.99
  -2  -2   5  246.64   10.48
  -2  -2   5  234.20   10.46
  -2  -2   4  926.40   38.41
  -2  -2   4  915.45   38.41
  -2  -2   4  862.41   39.09
  -2  -2   3  173.59    9.01
  -2  -2   2  944.58   40.92
  -2  -2   1 1401.74   58.72
  -2  -2   1 1526.39   60.66
  -2  -2   0  273.67   12.54
  -2  -2   0  287.78   13.57
  -2  -2  -1   59.13    3.79
  -2  -2  -2  215.54   10.73
  -2  -2  -2  208.32   10.13
  -2  -2  -3   10.48    2.02
  -2  -2  -4    5.50    1.62
  -2  -2  -5  198.44   11.80
  -2  -2  -5  198.77    9.95
  -2  -2  -6 1020.67   42.56
  -2  -2  -6  984.58   42.47
  -2  -2  -6 1008.71   43.19
  -2  -2  -6 1132.71   46.73
  -2  -2  -7 1037.15   44.26
  -2  -2  -7 1090.45   49.06
  -2  -2  -7 1057.00   44.32
  -2  -2  -8   40.81    3.38
  -2  -2  -8   39.71    2.85
  -2  -2  -8   38.88    3.52
  -2  -2  -8   39.14    3.26
  -2  -2  -8   36.49    2.78
  -2  -2  -8   37.92    5.71
  -2  -2  -9  358.83   16.30
  -2  -2  -9  353.99   15.18
  -2  -2  -9  327.91   15.04
  -2  -2  -9  342.94   15.71
  -2  -2  -9  307.90   14.87
  -2  -2  -9  354.43   20.49
  -2  -2 -10   -0.25    2.28
  -2  -2 -10    3.95    1.67
  -2  -2 -10    3.76    1.86
  -2  -2 -10   -3.02    4.02
  -2  -2 -10    2.77    1.40
  -2  -2 -11    5.13    1.62
  -2  -2 -11    4.57    1.46
  -2  -2 -11    9.57    3.03
  -2  -2 -11    6.51    3.67
  -2  -2 -12    8.71    2.25
  -2  -2 -12    7.31    2.85
  -2  -2 -12    5.70    2.28
  -2  -2 -13    0.83    1.60
  -2  -2 -13    1.25    2.00
  -2  -2 -13    0.55    1.61
   2   3 -12   28.14    1.99
   2   3 -11    3.37    1.43
  -2  -3  11    2.20    1.44
   2   3 -11    3.24    1.63
   2   3 -10   12.84    2.07
  -2  -3  10    9.10    2.28
   2   3 -10   13.43    2.26
   2   3  -9   17.86    2.41
   2   3  -9   15.79    2.58
   2   3  -8  151.77    7.72
  -2  -3   8  158.72    8.36
   2   3  -8  148.92    7.87
   2   3  -7   21.49    2.33
  -2  -3   7   24.59    2.84
   2   3  -7   23.54    2.48
   2   3  -6    6.01    1.56
  -2  -3   6    7.81    2.02
   2   3  -6    3.65    1.48
  -2  -3   6    3.56    1.78
  -2  -3   6    4.62    1.32
   2   3  -5    5.81    1.30
  -2  -3   5    4.27    1.68
  -2  -3   5    6.98    1.40
   2   3  -5    6.73    1.42
  -2  -3   5    7.82    1.65
  -2  -3   4  622.65   25.82
  -2  -3   4  540.06   26.72
  -2  -3   4  601.25   25.85
  -2  -3   3  552.86   25.91
  -2  -3   3  579.67   24.62
  -2  -3   2  178.10    9.69
  -2  -3   1 2414.57  101.89
  -2  -3   0   94.75    5.86
  -2  -3   0   93.39    6.10
  -2  -3   0   90.56    5.02
  -2  -3  -1  125.19    6.89
  -2  -3  -1  107.79    7.00
  -2  -3  -1  119.47    6.63
  -2  -3  -2   81.40    5.17
  -2  -3  -2   75.20    5.30
  -2  -3  -2   75.50    5.33
  -2  -3  -3  324.81   15.36
  -2  -3  -3  321.36   16.07
  -2  -3  -3  308.85   15.52
  -2  -3  -4   99.02    7.26
  -2  -3  -4  107.21    6.55
  -2  -3  -5    4.33    1.69
  -2  -3  -6   71.22    3.80
  -2  -3  -6   71.41    4.99
  -2  -3  -6   69.96    3.78
  -2  -3  -7   -0.14    1.50
  -2  -3  -7    0.93    1.02
  -2  -3  -7    0.83    1.54
  -2  -3  -7    2.40    3.08
  -2  -3  -7    3.43    1.70
  -2  -3  -8  122.43    6.67
  -2  -3  -8  131.08    7.01
  -2  -3  -8  115.53    5.92
  -2  -3  -8  123.30    6.82
  -2  -3  -8  120.91    6.83
  -2  -3  -8  115.63    6.29
  -2  -3  -8  110.51    5.89
  -2  -3  -8  110.54    9.97
  -2  -3  -9  244.75   11.72
  -2  -3  -9  221.07   10.59
  -2  -3  -9  250.95   12.02
  -2  -3  -9  234.17   11.48
  -2  -3  -9  220.81   10.63
  -2  -3  -9  268.84   16.74
  -2  -3  -9  224.92   10.97
  -2  -3 -10   53.23    4.18
  -2  -3 -10   50.33    3.34
  -2  -3 -10   49.65    7.51
  -2  -3 -10   49.87    3.56
  -2  -3 -11   -1.21    2.19
  -2  -3 -11    0.19    1.69
  -2  -3 -12   30.37    3.32
  -2  -3 -12   25.97    2.89
  -2  -3 -13    2.80    2.07
  -2  -3 -13    1.36    1.54
  -2  -3 -13    0.88    1.63
   2   4 -11    3.63    1.25
  -2  -4  11    3.10    1.34
   2   4 -11    5.03    1.42
   2   4 -10    5.47    1.65
  -2  -4  10    8.12    2.08
   2   4 -10    6.09    1.82
   2   4  -9   45.95    3.72
   2   4  -9   51.96    3.54
  -2  -4   9   52.08    4.28
   2   4  -8    5.38    1.96
   2   4  -8    1.13    1.63
   2   4  -7  159.17    7.87
  -2  -4   7  155.81    8.65
   2   4  -7  155.11    7.92
   2   4  -6    4.56    1.52
  -2  -4   6    3.45    2.16
  -2  -4   6    3.45    1.53
   2   4  -6    2.67    1.65
  -2  -4   5  116.99    6.63
   2   4  -5  111.79    5.94
  -2  -4   5  127.03    6.67
  -2  -4   5  123.55    6.39
  -2  -4   4  221.84   10.31
   2   4  -4  198.92    9.49
  -2  -4   4  217.61   10.04
  -2  -4   4  216.17   11.67
  -2  -4   3  165.53    7.76
  -2  -4   3  167.51    9.83
  -2  -4   3  160.94    8.10
   2   4  -3  169.55    7.55
  -2  -4   2  398.14   17.23
  -2  -4   2  389.05   16.94
  -2  -4   2  400.93   19.24
  -2  -4   2  379.13   17.12
  -2  -4   1  598.42   25.00
  -2  -4   1  560.03   27.14
  -2  -4   1  578.92   25.09
  -2  -4   0  483.27   22.78
  -2  -4   0  471.11   22.55
  -2  -4  -1 1513.48   64.18
  -2  -4  -1 1507.43   65.64
  -2  -4  -1 1549.69   66.55
  -2  -4  -1 1642.00   66.24
  -2  -4  -2   45.91    4.21
  -2  -4  -2   43.11    4.18
  -2  -4  -3  264.38   13.71
  -2  -4  -3  254.14   13.93
  -2  -4  -3  253.39   11.53
  -2  -4  -3  276.25   13.54
  -2  -4  -4  298.69   15.13
  -2  -4  -4  260.54   13.82
  -2  -4  -4  256.79   11.70
  -2  -4  -5   17.21    3.64
  -2  -4  -5   19.14    3.07
  -2  -4  -5   19.54    1.72
  -2  -4  -6  165.13    8.48
  -2  -4  -6  174.97    8.36
  -2  -4  -6  160.65    7.73
  -2  -4  -6  152.44    9.59
  -2  -4  -6  173.72    8.62
  -2  -4  -6  177.27    8.61
  -2  -4  -7  131.15    6.91
  -2  -4  -7  114.81    6.47
  -2  -4  -7  132.52    6.68
  -2  -4  -7  123.58    6.79
  -2  -4  -7  120.25    6.55
  -2  -4  -7  115.15   10.22
  -2  -4  -7  107.17    5.96
  -2  -4  -7  130.70    6.60
  -2  -4  -7  129.06    7.02
  -2  -4  -7  133.00    7.10
  -2  -4  -8   11.25    2.50
  -2  -4  -8   14.69    2.33
  -2  -4  -8   12.13    2.12
  -2  -4  -8   13.09    2.31
  -2  -4  -8   14.63    2.48
  -2  -4  -8    7.50    3.95
  -2  -4  -8    8.65    1.57
  -2  -4  -8   11.96    2.48
  -2  -4  -9   23.93    3.05
  -2  -4  -9   26.85    3.06
  -2  -4  -9   20.82    3.05
  -2  -4  -9   29.01    3.37
  -2  -4  -9   22.46    2.87
  -2  -4  -9   27.17    2.90
  -2  -4  -9   23.02    2.24
  -2  -4  -9   31.83    6.48
  -2  -4 -10   -0.73    2.46
  -2  -4 -10    4.32    2.33
  -2  -4 -10    1.14    1.87
  -2  -4 -10   -0.34    1.37
  -2  -4 -10   -1.67    3.86
  -2  -4 -11   47.71    4.33
  -2  -4 -11   43.46    3.31
  -2  -4 -11   39.81    3.75
  -2  -4 -12    6.59    2.45
  -2  -4 -12    4.58    2.46
  -2  -4 -12    6.31    2.12
  -2  -4 -13    2.00    1.70
  -2  -4 -13    2.78    1.43
  -2  -4 -13    0.95    1.83
   2   5 -10   48.59    3.10
   2   5 -10   48.28    2.90
   2   5  -9   25.60    2.63
  -2  -5   9   27.65    3.17
   2   5  -9   34.67    2.65
   2   5  -8   35.89    3.11
   2   5  -8   40.81    3.15
  -2  -5   8   39.34    3.89
   2   5  -7   51.05    3.60
  -2  -5   7   47.85    4.43
  -2  -5   6  112.84    6.23
   2   5  -6  101.55    5.74
   2   5  -6  117.73    6.04
  -2  -5   5   11.07    2.03
  -2  -5   5    9.23    2.48
   2   5  -5    8.55    1.54
  -2  -5   4  175.40    8.54
  -2  -5   4  144.61   10.05
  -2  -5   3   66.92    4.19
  -2  -5   3   61.86    5.78
  -2  -5   3   58.60    3.67
  -2  -5   3   63.19    4.24
  -2  -5   2   87.77    5.09
  -2  -5   2   90.41    7.17
  -2  -5   2   85.30    4.79
  -2  -5   2   97.20    5.29
  -2  -5   1    6.44    2.66
  -2  -5   1    1.62    2.88
  -2  -5   1    3.80    1.45
  -2  -5   1    3.93    1.27
  -2  -5   1    4.08    1.43
  -2  -5   0  814.22   37.42
  -2  -5   0  822.87   34.68
  -2  -5   0  822.62   34.69
  -2  -5   0  759.55   37.34
  -2  -5  -1  888.61   38.70
  -2  -5  -1  839.16   38.88
  -2  -5  -1  871.13   36.08
  -2  -5  -1  822.49   35.83
  -2  -5  -2  565.69   24.79
  -2  -5  -2  574.46   27.31
  -2  -5  -2  619.39   27.47
  -2  -5  -3   19.62    3.45
  -2  -5  -3   14.16    1.76
  -2  -5  -3   11.90    1.52
  -2  -5  -3   11.25    3.18
  -2  -5  -3   16.36    3.20
  -2  -5  -4  336.24   14.67
  -2  -5  -4  345.13   18.28
  -2  -5  -4  324.93   17.36
  -2  -5  -4  318.53   14.36
  -2  -5  -5   14.90    2.18
  -2  -5  -5   17.63    3.63
  -2  -5  -5   25.86    2.36
  -2  -5  -5   19.75    4.59
  -2  -5  -5   20.31    2.38
  -2  -5  -5   20.39    1.93
  -2  -5  -6   69.88    4.51
  -2  -5  -6   64.43    3.88
  -2  -5  -6   69.09    4.62
  -2  -5  -6   81.38    4.17
  -2  -5  -6   55.36    5.64
  -2  -5  -6   63.02    4.32
  -2  -5  -6   81.25    4.46
  -2  -5  -6   70.30    4.29
  -2  -5  -6   71.08    4.52
  -2  -5  -6   70.97    7.64
  -2  -5  -6   71.71    4.72
  -2  -5  -6   65.33    4.68
  -2  -5  -6   66.95    3.96
  -2  -5  -7   49.70    4.10
  -2  -5  -7   46.21    3.29
  -2  -5  -7   52.54    5.18
  -2  -5  -7   57.38    3.96
  -2  -5  -7   51.03    3.27
  -2  -5  -7   57.57    4.34
  -2  -5  -7   48.48    4.17
  -2  -5  -7   49.13    3.84
  -2  -5  -7   58.34    3.85
  -2  -5  -7   51.16    3.71
  -2  -5  -8   52.11    4.03
  -2  -5  -8   56.65    4.20
  -2  -5  -8   60.94    4.48
  -2  -5  -8   48.92    3.42
  -2  -5  -8   60.45    4.15
  -2  -5  -8   59.06    3.57
  -2  -5  -8   53.87    4.51
  -2  -5  -8   55.43    4.49
  -2  -5  -8   55.06    4.07
  -2  -5  -8   53.24    4.34
  -2  -5  -9   68.10    5.02
  -2  -5  -9   70.38    4.68
  -2  -5  -9   68.83    4.62
  -2  -5  -9   75.72    4.81
  -2  -5  -9   59.12    4.76
  -2  -5  -9   63.33    3.88
  -2  -5  -9   58.35    4.96
  -2  -5  -9   66.56    3.98
  -2  -5  -9   64.73    8.51
  -2  -5 -10   -0.47    2.37
  -2  -5 -10    2.94    2.25
  -2  -5 -10    1.04    1.97
  -2  -5 -10    4.01    2.16
  -2  -5 -10    0.43    1.37
  -2  -5 -10    0.85    3.93
  -2  -5 -11    5.01    2.24
  -2  -5 -11    4.78    1.87
  -2  -5 -11    3.84    2.40
  -2  -5 -12    6.95    2.27
  -2  -5 -12    6.06    2.18
  -2  -5 -13    6.39    1.71
  -2  -5 -13    8.01    1.72
   2   6  -9   58.11    3.64
   2   6  -9   69.31    3.66
  -2  -6   9   70.39    4.34
   2   6  -8   44.52    3.14
   2   6  -8   44.40    3.08
  -2  -6   8   45.59    3.86
   2   6  -7  141.71    7.54
  -2  -6   7  150.58    8.44
   2   6  -7  160.84    7.64
   2   6  -6    3.32    1.91
  -2  -6   5   45.83    3.77
  -2  -6   5   37.82    3.91
  -2  -6   4   18.09    2.77
  -2  -6   4   18.80    2.69
  -2  -6   3   10.60    3.42
  -2  -6   3    9.22    2.17
  -2  -6   3    9.91    1.79
  -2  -6   2  152.44    7.90
  -2  -6   2  161.17    8.29
  -2  -6   2  166.20   11.56
  -2  -6   2  165.57   10.95
  -2  -6   2  153.38    8.25
  -2  -6   1  287.70   13.80
  -2  -6   1  308.10   14.00
  -2  -6   1  304.85   14.12
  -2  -6   1  301.35   17.18
  -2  -6   0  429.20   18.78
  -2  -6   0  417.54   18.40
  -2  -6   0  379.69   21.77
  -2  -6   0  420.90   18.71
  -2  -6   0  405.09   18.78
  -2  -6  -1  142.96    9.77
  -2  -6  -1  150.85    7.21
  -2  -6  -1  128.76    7.02
  -2  -6  -1  132.35    9.88
  -2  -6  -1  131.08    7.06
  -2  -6  -2   97.74    5.37
  -2  -6  -2   92.86    5.42
  -2  -6  -2   97.73    7.72
  -2  -6  -3    7.93    3.08
  -2  -6  -3    7.89    1.77
  -2  -6  -3    4.06    3.01
  -2  -6  -3   10.81    3.35
  -2  -6  -3    4.80    1.65
  -2  -6  -3    5.97    1.65
  -2  -6  -3    4.88    1.60
  -2  -6  -3    7.47    1.66
  -2  -6  -3    6.50    1.76
  -2  -6  -3    3.67    1.40
  -2  -6  -4  155.37    8.29
  -2  -6  -4  155.99    7.68
  -2  -6  -4  174.64   11.68
  -2  -6  -4  130.98   10.35
  -2  -6  -4  150.51    7.70
  -2  -6  -4  179.36    8.56
  -2  -6  -4  166.38    7.99
  -2  -6  -4  162.69    8.33
  -2  -6  -4  160.14    8.28
  -2  -6  -4  168.86    8.26
  -2  -6  -4  154.12    8.03
  -2  -6  -5   57.59    6.80
  -2  -6  -5   60.01    6.20
  -2  -6  -5   56.40    3.79
  -2  -6  -5   51.72    3.65
  -2  -6  -5   62.11    4.07
  -2  -6  -5   53.41    3.60
  -2  -6  -5   57.24    4.25
  -2  -6  -5   56.55    4.14
  -2  -6  -5   57.99    3.51
  -2  -6  -5   52.44    3.69
  -2  -6  -6  102.52    9.77
  -2  -6  -6   87.54    8.13
  -2  -6  -6  108.30    5.88
  -2  -6  -6  112.47    6.59
  -2  -6  -6  108.47    5.92
  -2  -6  -6  113.60    6.48
  -2  -6  -6  114.28    5.74
  -2  -6  -6  114.09    6.44
  -2  -6  -6  114.80    6.13
  -2  -6  -6  100.81    6.48
  -2  -6  -6  104.22    6.53
  -2  -6  -6  111.15    6.03
  -2  -6  -7   11.99    2.35
  -2  -6  -7    7.80    2.11
  -2  -6  -7    8.33    1.94
  -2  -6  -7    8.03    2.21
  -2  -6  -7   11.92    2.17
  -2  -6  -7    5.07    2.21
  -2  -6  -7    7.64    1.71
  -2  -6  -7    6.74    1.57
  -2  -6  -7   11.85    4.46
  -2  -6  -7    9.48    2.34
  -2  -6  -7    9.33    2.68
  -2  -6  -7    9.92    1.80
  -2  -6  -8    0.37    1.89
  -2  -6  -8    2.27    1.87
  -2  -6  -8    2.27    1.97
  -2  -6  -8    3.93    2.11
  -2  -6  -8    2.13    1.55
  -2  -6  -8    4.21    4.40
  -2  -6  -8    3.41    1.96
  -2  -6  -8    1.19    1.45
  -2  -6  -8    1.55    2.50
  -2  -6  -9  146.79    7.86
  -2  -6  -9  139.12    7.52
  -2  -6  -9  146.19    8.18
  -2  -6  -9  141.61    8.35
  -2  -6  -9  133.41    7.73
  -2  -6  -9  136.13    7.43
  -2  -6  -9  128.86    7.74
  -2  -6  -9  136.93    7.00
  -2  -6  -9  145.59    8.13
  -2  -6  -9  140.37    6.97
  -2  -6 -10    1.75    1.87
  -2  -6 -10    1.85    2.06
  -2  -6 -10    2.56    2.23
  -2  -6 -10    0.54    2.00
  -2  -6 -10    4.84    2.39
  -2  -6 -10    2.51    2.10
  -2  -6 -11   12.11    2.28
  -2  -6 -11   13.10    2.60
  -2  -6 -12   32.74    3.06
   2   7  -8    4.22    1.21
   2   7  -7   37.19    2.74
   2   7  -6   13.26    2.05
  -2  -7   6    4.70    2.24
   2   7  -5   22.85    2.50
  -2  -7   5   15.90    2.86
  -2  -7   4  295.86   14.86
  -2  -7   4  329.72   15.11
  -2  -7   3    9.00    1.94
  -2  -7   3   12.25    2.50
  -2  -7   3   11.42    2.39
  -2  -7   2    5.49    2.28
  -2  -7   2    3.83    1.89
  -2  -7   2    3.69    3.69
  -2  -7   2    4.01    1.93
  -2  -7   1   16.69    2.41
  -2  -7   1   17.95    4.66
  -2  -7   1   18.93    4.75
  -2  -7   1   14.71    2.18
  -2  -7   0    7.14    2.22
  -2  -7   0    6.08    1.58
  -2  -7   0    7.41    3.57
  -2  -7   0    4.46    3.80
  -2  -7   0    6.59    2.02
  -2  -7  -1  543.78   24.16
  -2  -7  -1  549.07   24.29
  -2  -7  -1  550.19   24.12
  -2  -7  -1  532.83   28.39
  -2  -7  -1  568.87   27.93
  -2  -7  -1  539.57   24.21
  -2  -7  -2   16.20    2.53
  -2  -7  -2   20.49    2.54
  -2  -7  -2   22.92    2.54
  -2  -7  -2   21.57    2.58
  -2  -7  -2   21.77    4.45
  -2  -7  -3   42.75    3.56
  -2  -7  -3   38.98    3.48
  -2  -7  -3   44.83    3.32
  -2  -7  -3   43.42    3.57
  -2  -7  -3   35.91    3.08
  -2  -7  -3   38.96    5.82
  -2  -7  -3   40.29    5.64
  -2  -7  -4   43.56    3.59
  -2  -7  -4   47.45    3.41
  -2  -7  -4   43.74    3.79
  -2  -7  -4   43.32    3.52
  -2  -7  -4   42.77    3.70
  -2  -7  -4   40.64    3.50
  -2  -7  -4   39.52    3.72
  -2  -7  -4   35.38    5.89
  -2  -7  -5   13.51    4.18
  -2  -7  -5    6.31    2.10
  -2  -7  -5    6.43    2.25
  -2  -7  -5    5.20    1.78
  -2  -7  -5    8.92    2.26
  -2  -7  -5    7.90    1.99
  -2  -7  -5    4.18    2.30
  -2  -7  -5    7.32    1.92
  -2  -7  -6   39.59    3.74
  -2  -7  -6   31.75    3.45
  -2  -7  -6   37.83    3.15
  -2  -7  -6   40.29    3.54
  -2  -7  -6   35.13    2.87
  -2  -7  -6   29.06    2.98
  -2  -7  -6   33.91    3.05
  -2  -7  -6   36.34    3.11
  -2  -7  -6   37.58    3.74
  -2  -7  -7    0.24    2.20
  -2  -7  -7    2.62    2.57
  -2  -7  -7   -0.30    1.65
  -2  -7  -7    0.97    2.05
  -2  -7  -7    0.18    1.81
  -2  -7  -7    0.74    1.53
  -2  -7  -7    4.09    2.24
  -2  -7  -7    2.28    1.52
  -2  -7  -7    1.78    1.63
  -2  -7  -7    1.66    2.24
  -2  -7  -8   44.12    3.99
  -2  -7  -8   45.29    3.43
  -2  -7  -8   44.53    3.94
  -2  -7  -8   47.27    3.41
  -2  -7  -8   42.40    3.80
  -2  -7  -8   48.96    4.11
  -2  -7  -8   47.11    3.21
  -2  -7  -8   41.71    4.16
  -2  -7  -8   40.97    4.12
  -2  -7  -9  112.82    6.65
  -2  -7  -9  120.44    5.87
  -2  -7  -9  115.74    6.96
  -2  -7  -9  111.07    5.94
  -2  -7  -9   98.72    6.48
  -2  -7 -10    8.31    2.60
  -2  -7 -10    8.70    2.22
  -2  -7 -10    7.90    2.10
  -2  -7 -10    8.08    2.22
  -2  -7 -11    2.82    1.75
  -2  -7 -12   54.01    3.42
  -2  -8   7   17.43    2.13
   2   8  -7   16.03    1.51
  -2  -8   6    5.20    1.88
   2   8  -6    6.36    1.44
  -2  -8   5   11.41    2.45
   2   8  -5   11.68    1.86
  -2  -8   4   12.57    2.42
  -2  -8   3   53.20    3.82
  -2  -8   3   59.61    4.24
  -2  -8   2  128.18    6.92
  -2  -8   2  118.30    6.75
  -2  -8   1   33.96    3.13
  -2  -8   1   23.98    2.57
  -2  -8   0    2.19    2.12
  -2  -8   0    3.07    3.85
  -2  -8   0    5.65    4.18
  -2  -8   0    2.78    2.13
  -2  -8   0    0.95    1.63
  -2  -8  -1    4.79    1.93
  -2  -8  -1    4.78    3.80
  -2  -8  -1   12.89    4.59
  -2  -8  -1    3.71    2.21
  -2  -8  -1    4.17    2.24
  -2  -8  -1    3.93    1.87
  -2  -8  -2  186.77    9.57
  -2  -8  -2  220.35   13.46
  -2  -8  -2  190.33   13.77
  -2  -8  -2  172.90    9.41
  -2  -8  -2  184.69    9.70
  -2  -8  -3    8.06    2.30
  -2  -8  -3    6.49    2.22
  -2  -8  -3    4.28    4.23
  -2  -8  -3    4.05    3.86
  -2  -8  -4   37.13    6.30
  -2  -8  -4   47.71    3.47
  -2  -8  -4   50.04    4.22
  -2  -8  -4   40.73    3.68
  -2  -8  -4   47.36    4.07
  -2  -8  -4   46.35    4.03
  -2  -8  -4   46.56    3.61
  -2  -8  -5    5.68    2.02
  -2  -8  -5    4.61    1.76
  -2  -8  -5    8.59    2.49
  -2  -8  -5    2.94    2.00
  -2  -8  -5    7.06    2.47
  -2  -8  -5    6.06    2.11
  -2  -8  -6    2.19    1.85
  -2  -8  -6    1.25    2.28
  -2  -8  -6    4.60    1.67
  -2  -8  -6    5.70    2.51
  -2  -8  -6    1.89    1.81
  -2  -8  -6    1.67    2.19
  -2  -8  -6    5.14    2.21
  -2  -8  -6    5.08    1.94
  -2  -8  -7    3.24    1.72
  -2  -8  -7    5.36    2.47
  -2  -8  -7    4.23    2.23
  -2  -8  -7    3.90    2.13
  -2  -8  -7    6.45    2.41
  -2  -8  -7    4.03    1.64
  -2  -8  -8    3.47    2.10
  -2  -8  -8    3.29    1.69
  -2  -8  -8    1.94    2.10
  -2  -8  -8    0.85    2.26
  -2  -8  -8    1.78    2.33
  -2  -8  -9   26.59    2.86
  -2  -8  -9   30.30    3.28
  -2  -8 -10   10.38    1.88
  -2  -9   5    1.92    1.33
   2   9  -5    2.14    1.02
  -2  -9   4    5.58    1.72
   2   9  -4    9.86    1.58
  -2  -9   3    1.58    1.56
  -2  -9   2   24.52    2.63
  -2  -9   1   43.18    3.59
  -2  -9   0   20.22    2.72
  -2  -9  -1   76.14    4.42
  -2  -9  -1   83.49    5.30
  -2  -9  -1   87.66    8.24
  -2  -9  -1   71.69    4.81
  -2  -9  -2    6.95    2.16
  -2  -9  -2    1.12    2.19
  -2  -9  -2    2.93    3.43
  -2  -9  -2    3.47    2.07
  -2  -9  -3   85.39    5.59
  -2  -9  -3   97.02    6.11
  -2  -9  -3   88.49    5.64
  -2  -9  -4   19.89    3.05
  -2  -9  -4   15.11    2.83
  -2  -9  -4   16.67    2.67
  -2  -9  -4   16.10    2.82
  -2  -9  -5    8.39    2.43
  -2  -9  -5    1.82    1.94
  -2  -9  -5    7.63    2.41
  -2  -9  -6   10.82    2.61
  -2  -9  -6   13.27    2.64
  -2  -9  -6    8.13    1.97
  -2  -9  -6   14.84    2.68
  -2  -9  -7   -0.34    1.91
  -2  -9  -7    6.70    2.32
  -2  -9  -8    2.48    1.81
  -2  -9  -8    0.63    1.90
  -2  -9  -9    4.77    1.58
  -2  -9  -9    4.95    1.83
  -2 -10   3   -0.09    1.17
   2  10  -2    1.56    1.07
  -2 -10   2    1.33    1.25
  -2 -10   0   11.60    2.01
  -2 -10  -1    8.95    1.99
  -2 -10  -1    7.50    1.66
  -2 -10  -2   33.64    3.31
  -2 -10  -2   30.90    2.92
  -2 -10  -2   23.66    2.57
  -2 -10  -3   20.62    2.84
  -2 -10  -3   19.92    2.43
  -2 -10  -4   22.47    2.89
  -2 -10  -4   19.92    2.41
  -2 -10  -4   18.11    2.46
  -2 -10  -5    5.27    1.64
  -2 -10  -5    5.35    1.95
  -2 -10  -6   28.11    2.75
  -2 -10  -6   26.97    2.71
  -2 -10  -7   15.24    2.10
  -2 -10  -7   15.38    2.07
  -2 -10  -8    2.30    1.35
  -2 -10  -8    1.73    1.25
  -2 -11  -1    2.49    1.40
  -2 -11  -2    3.41    1.54
  -2 -11  -3    5.42    1.10
  -2 -11  -3   14.10    1.86
  -2 -11  -4   12.93    1.46
   3 -10  -6   12.14    1.77
   3 -10  -6   13.53    1.49
   3 -10  -5    7.33    1.83
   3 -10  -5    6.60    1.76
   3 -10  -5    7.82    1.58
   3 -10  -4   21.28    2.51
   3 -10  -4   22.25    2.35
   3 -10  -3   86.05    5.02
   3 -10  -3   74.30    4.69
   3 -10  -2    0.83    1.75
   3 -10  -1   60.42    4.07
   3 -10   0   31.56    2.72
   3 -10   0   38.26    3.16
   3 -10   1    3.82    1.59
   3 -10   1    2.87    1.88
   3 -10   1    4.29    1.52
  -3  10  -2   24.26    2.28
   3 -10   2   25.59    2.13
   3 -10   2   30.67    2.65
   3 -10   3    1.04    1.15
  -3  10  -3    0.38    1.23
   3 -10   3    0.88    1.29
   3  -9  -8   16.55    1.80
   3  -9  -8   17.70    1.82
   3  -9  -8   13.49    1.81
   3  -9  -7    2.10    1.47
   3  -9  -7    0.34    1.39
   3  -9  -7   -0.41    1.64
   3  -9  -6   34.93    3.08
   3  -9  -6   37.14    2.82
   3  -9  -6   27.89    2.56
   3  -9  -5    4.42    1.71
   3  -9  -5    1.40    1.68
   3  -9  -4  179.66    8.95
   3  -9  -4  157.08    8.15
   3  -9  -4  165.40    8.55
   3  -9  -3   23.80    3.04
   3  -9  -3   25.35    2.40
   3  -9  -3   25.40    2.87
   3  -9  -2    9.66    2.67
   3  -9  -1   66.28    4.72
   3  -9  -1   68.72    4.45
   3  -9   0   26.36    3.01
   3  -9   0   28.40    2.87
   3  -9   1   47.79    3.78
   3  -9   2   63.59    4.20
   3  -9   3   54.29    3.69
   3  -9   3   50.05    3.40
  -3   9  -3   51.88    3.79
   3  -9   4    4.42    1.64
   3  -9   5    2.61    1.30
  -3   9  -5    3.33    1.49
   3  -8 -10    0.10    1.20
   3  -8 -10    2.27    1.13
   3  -8 -10    0.90    1.07
   3  -8  -9   71.06    4.34
   3  -8  -9   70.70    4.17
   3  -8  -9   69.98    4.05
   3  -8  -8   45.84    3.51
   3  -8  -8   43.77    3.30
   3  -8  -8   35.79    3.13
   3  -8  -8   49.12    3.27
   3  -8  -7    4.44    1.97
   3  -8  -7    6.76    2.01
   3  -8  -7    6.03    1.86
   3  -8  -6    3.73    1.93
   3  -8  -6    3.95    1.67
   3  -8  -6    2.69    1.97
   3  -8  -6    4.93    2.06
   3  -8  -6    5.31    1.89
   3  -8  -5   12.10    2.20
  -3   8   5   14.14    4.51
   3  -8  -5    9.14    1.99
   3  -8  -5   11.09    2.19
   3  -8  -5    8.43    2.41
   3  -8  -5   10.97    2.18
   3  -8  -4   57.11    4.26
   3  -8  -4   50.45    3.70
   3  -8  -4   46.50    3.52
  -3   8   4   43.41    6.64
  -3   8   3    5.81    4.04
   3  -8  -3    6.49    1.81
   3  -8  -3    6.51    2.37
   3  -8  -2   -0.28    1.50
  -3   8   2   -0.73    3.57
   3  -8  -2    1.87    1.95
   3  -8  -2    3.11    2.37
   3  -8  -1  197.31    9.94
  -3   8   0    6.43    3.91
   3  -8   0    4.11    2.18
  -3   8  -1    5.57    3.81
  -3   8  -2   37.16    5.97
   3  -8   2   49.28    3.86
   3  -8   2   46.25    3.80
   3  -8   3    0.62    1.89
   3  -8   3   -1.06    1.64
   3  -8   4   95.32    5.19
   3  -8   4   74.52    4.62
  -3   8  -5   48.67    3.65
   3  -8   5   41.76    3.31
  -3   8  -6    2.38    1.65
   3  -8   6    1.38    1.39
  -3   8  -7   32.61    2.50
   3  -8   7   34.89    2.28
   3  -7 -11   17.21    1.71
   3  -7 -11   22.42    1.78
   3  -7 -10    1.02    1.47
   3  -7 -10    2.28    1.76
   3  -7  -9   53.38    3.55
   3  -7  -9   46.42    3.85
   3  -7  -8   54.93    4.10
   3  -7  -8   56.59    4.35
   3  -7  -8   62.94    4.05
   3  -7  -7   27.52    2.97
   3  -7  -7   33.25    3.39
   3  -7  -7   28.03    2.91
   3  -7  -7   26.17    3.00
   3  -7  -6   21.94    2.75
   3  -7  -6   19.75    2.79
   3  -7  -6   22.76    2.94
   3  -7  -6   25.30    2.75
   3  -7  -5   18.37    2.52
   3  -7  -5   17.39    2.34
  -3   7   5   13.92    4.43
   3  -7  -5   14.20    2.51
   3  -7  -5   15.08    2.47
   3  -7  -5   18.39    2.38
   3  -7  -4    0.83    1.82
  -3   7   4    1.37    3.46
   3  -7  -4    5.71    2.14
   3  -7  -4    1.01    1.67
   3  -7  -4    4.42    1.82
   3  -7  -3   19.86    2.45
   3  -7  -3   21.78    2.82
   3  -7  -3   21.05    2.70
  -3   7   3   21.95    5.19
   3  -7  -2    9.14    2.69
   3  -7  -2    4.38    2.14
   3  -7  -2    6.47    1.68
  -3   7   2    7.50    3.89
  -3   7   1  508.50   28.85
   3  -7  -1  542.59   24.66
   3  -7  -1  515.44   26.92
   3  -7  -1  593.01   24.59
   3  -7  -1  558.19   29.12
   3  -7   0   63.88    4.49
  -3   7   0   67.11    7.79
   3  -7   0   65.98    6.59
   3  -7   1   97.22    5.84
  -3   7  -1   83.84    8.83
   3  -7   1   95.74    8.37
   3  -7   1  104.91    5.99
   3  -7   2    5.25    2.14
   3  -7   2    6.80    3.79
  -3   7  -2   11.76    4.28
   3  -7   2    9.86    2.24
   3  -7   3   61.65    7.14
   3  -7   3   69.42    4.57
  -3   7  -3   53.70    6.91
   3  -7   4  141.97    7.57
   3  -7   4  160.38    7.95
  -3   7  -5    4.05    2.34
   3  -7   5    5.08    1.99
  -3   7  -6    2.03    2.08
   3  -7   6    2.47    1.72
  -3   7  -7   90.82    5.14
   3  -7   7   85.71    4.79
  -3   7  -8   58.84    3.62
  -3   7  -8   65.51    4.37
   3  -6 -11   62.82    3.77
   3  -6 -11   67.09    4.01
   3  -6 -11   61.81    3.77
   3  -6 -10   13.62    2.15
   3  -6  -9  230.69   11.93
   3  -6  -9  253.66   11.65
   3  -6  -8    0.98    2.18
   3  -6  -8    4.02    2.04
   3  -6  -8    1.22    1.69
   3  -6  -8    3.66    2.02
   3  -6  -7   44.49    3.86
   3  -6  -7   47.61    3.57
   3  -6  -7   44.10    3.61
   3  -6  -7   40.69    3.56
  -3   6   6  133.22   10.52
   3  -6  -6  137.98    7.65
   3  -6  -6  134.74    7.23
   3  -6  -6  139.82    7.41
   3  -6  -6  141.09    7.04
   3  -6  -6  130.83    7.38
  -3   6   5  157.32   11.37
   3  -6  -5  141.56    7.78
   3  -6  -5  138.97    7.69
   3  -6  -5  147.72    7.54
   3  -6  -5  150.14    7.69
   3  -6  -5  144.05    7.45
  -3   6   4  162.19   11.74
   3  -6  -4  156.04    8.03
   3  -6  -4  157.28    7.98
   3  -6  -4  153.93    8.16
   3  -6  -4  177.68   11.56
   3  -6  -4  153.89    7.87
   3  -6  -3  105.27    7.04
   3  -6  -3  107.50    5.77
   3  -6  -3  102.03    5.88
   3  -6  -3  113.54    9.19
   3  -6  -3  100.39    5.61
   3  -6  -2    2.41    1.61
  -3   6   2    2.36    3.23
   3  -6  -2    2.81    1.34
   3  -6  -2    2.13    2.08
   3  -6  -2    2.46    1.55
   3  -6  -1  118.14    6.61
  -3   6   1  114.39    9.83
   3  -6  -1  123.37    9.80
   3  -6  -1  133.03    6.64
   3  -6  -1  110.74    8.25
   3  -6   0  603.65   29.97
   3  -6   0  629.77   28.97
   3  -6   0  583.69   27.70
   3  -6   0  577.96   25.97
   3  -6   1   41.85    4.64
   3  -6   1   49.61    3.50
  -3   6  -1   36.06    5.66
   3  -6   1   41.25    5.64
   3  -6   1   45.22    3.41
   3  -6   1   44.68    5.48
   3  -6   2  129.04    9.26
   3  -6   2  155.60   11.15
   3  -6   2  151.42    7.85
  -3   6  -2  155.33   11.17
   3  -6   2  151.72   10.86
   3  -6   2  160.57    7.92
   3  -6   3    6.49    1.78
  -3   6  -3    8.63    3.62
   3  -6   3    7.06    2.03
   3  -6   4  132.85    6.87
   3  -6   4  127.61    6.93
  -3   6  -4  127.93    9.95
   3  -6   4  132.74   10.63
  -3   6  -5   98.35    5.53
   3  -6   5   90.55    8.76
  -3   6  -5  116.90    6.32
   3  -6   5   99.25    5.75
  -3   6  -6  165.47    8.44
  -3   6  -6  190.44    9.07
   3  -6   6  163.06    8.50
  -3   6  -7  160.09    8.17
  -3   6  -7  177.19    8.56
   3  -6   7  158.14    8.03
  -3   6  -8    2.87    1.57
  -3   6  -8    2.61    1.69
  -3   6  -9   23.68    2.16
  -3   6  -9   21.45    2.78
  -3   6 -10   26.64    2.04
  -3   6 -10   32.00    2.57
   3  -5 -12   21.65    1.88
   3  -5 -12   25.88    2.05
   3  -5 -12   22.01    1.98
   3  -5 -11    1.65    1.49
   3  -5 -11    3.77    1.70
   3  -5 -11    4.10    1.71
   3  -5 -10   20.62    2.56
   3  -5 -10   24.55    2.71
   3  -5 -10   20.56    2.72
   3  -5  -9   67.41    4.57
   3  -5  -8    3.34    1.94
   3  -5  -8   10.99    2.44
   3  -5  -7  105.96    5.98
   3  -5  -7   99.50    5.98
   3  -5  -7  106.55    5.94
  -3   5   6  260.45   15.04
   3  -5  -6  259.92   11.91
   3  -5  -6  243.50   11.93
   3  -5  -6  246.18   11.90
   3  -5  -5   14.06    1.98
   3  -5  -5   13.17    1.74
   3  -5  -5   18.81    3.86
   3  -5  -5   10.95    1.91
   3  -5  -5   15.67    2.15
   3  -5  -4   51.86    3.39
   3  -5  -4   49.17    3.31
   3  -5  -4   47.49    5.39
  -3   5   4   51.49    5.87
   3  -5  -4   44.24    3.13
   3  -5  -4   45.11    3.34
  -3   5   3   66.79    6.60
   3  -5  -3   55.48    5.96
   3  -5  -3   63.11    3.91
   3  -5  -2   97.66    7.85
   3  -5  -2  104.37    5.56
  -3   5   2  107.08    8.55
  -3   5   1  746.81   35.52
   3  -5  -1  733.83   35.18
   3  -5   0   72.45    6.47
   3  -5   0   67.70    5.20
   3  -5   0   65.45    4.08
   3  -5   1   60.33    6.24
   3  -5   1   73.69    5.47
  -3   5  -1   77.38    7.02
   3  -5   1   74.49    4.31
   3  -5   2   95.89    7.13
   3  -5   2  109.42    5.89
   3  -5   2  123.55    8.82
   3  -5   2  114.65    5.88
  -3   5  -2  102.29    8.48
  -3   5  -3  158.98   10.45
   3  -5   3  142.00    7.12
   3  -5   3  137.74    7.09
   3  -5   3  148.80    9.97
   3  -5   3  156.02   10.42
   3  -5   3  145.51    8.86
  -3   5  -3  131.58    6.75
   3  -5   4  228.38   10.93
   3  -5   4  218.36   10.43
   3  -5   4  199.57   12.90
   3  -5   4  221.24   12.59
  -3   5  -4  221.53   13.46
   3  -5   4  226.35   14.01
   3  -5   5   77.85    5.25
  -3   5  -5   88.92    5.25
  -3   5  -5   74.55    6.84
   3  -5   5   84.71    7.99
   3  -5   5   78.50    4.73
   3  -5   6  143.31    7.58
   3  -5   6  148.47   10.99
   3  -5   6  152.43    8.21
  -3   5  -6  164.21    8.17
   3  -5   7   12.34    1.95
  -3   5  -7   16.85    2.57
  -3   5  -7   17.04    2.45
  -3   5  -8   12.37    2.26
  -3   5  -8   12.25    2.28
  -3   5  -9   17.49    2.18
  -3   5  -9   23.03    3.07
  -3   5  -9   17.10    2.25
  -3   5 -10   24.80    2.35
  -3   5 -10   25.63    2.90
   3  -4 -12    5.83    1.41
   3  -4 -12    4.91    1.57
   3  -4 -11   10.15    1.95
   3  -4 -11    8.78    1.88
   3  -4 -11    9.84    2.06
   3  -4 -10    2.24    1.88
   3  -4 -10    1.07    1.83
   3  -4 -10    0.62    1.91
   3  -4  -9  118.74    6.90
   3  -4  -9  109.95    5.96
   3  -4  -9  119.33    6.66
   3  -4  -9  128.80    6.80
   3  -4  -8    5.93    1.95
   3  -4  -8    8.07    1.59
   3  -4  -7   14.59    2.27
   3  -4  -7   13.28    1.74
   3  -4  -6  401.83   18.27
   3  -4  -6  418.48   20.32
   3  -4  -6  412.56   17.91
   3  -4  -5   55.97    5.13
  -3   4   5   50.23    5.40
   3  -4  -5   49.44    3.32
   3  -4  -4  137.28    9.13
  -3   4   4  149.81    9.79
   3  -4  -3   60.89    5.43
  -3   4   3   54.67    5.63
  -3   4   2    1.64    2.34
   3  -4  -2    1.52    2.46
   3  -4  -2    2.21    1.22
  -3   4   1  271.25   15.06
   3  -4   0   14.94    2.28
   3  -4   0   14.05    1.71
   3  -4   0   14.44    3.08
  -3   4  -1    4.44    2.77
   3  -4   1    2.86    1.74
   3  -4   1    3.80    1.23
   3  -4   1    4.60    2.53
  -3   4  -2  641.76   30.17
   3  -4   2  634.82   28.33
   3  -4   2  625.38   27.01
   3  -4   2  639.07   30.02
   3  -4   3   41.23    4.57
   3  -4   3   48.79    3.32
  -3   4  -3   38.52    4.66
   3  -4   3   38.35    3.90
   3  -4   3   38.97    2.76
   3  -4   4   54.16    3.73
  -3   4  -4   47.92    5.17
   3  -4   4   51.05    5.11
   3  -4   4   57.93    5.74
  -3   4  -5  587.45   25.03
  -3   4  -5  510.55   26.89
   3  -4   5  570.73   28.36
   3  -4   5  576.88   25.06
  -3   4  -6   74.60    4.49
   3  -4   6   59.66    3.84
   3  -4   6   60.03    6.58
   3  -4   6   65.64    4.40
   3  -4   7  180.90    9.02
   3  -4   7  162.30    8.26
  -3   4  -7  192.78    8.99
   3  -4   7  154.49   11.49
  -3   4  -8   40.57    3.41
  -3   4  -8   39.22    3.40
  -3   4  -9   15.36    2.25
  -3   4  -9   20.75    3.22
  -3   4  -9   14.14    2.40
  -3   4 -10   28.20    3.18
  -3   4 -10   20.56    2.46
  -3   4 -11    2.24    1.91
  -3   4 -11    5.18    1.59
   3  -3 -12    2.76    1.67
   3  -3 -12    2.15    1.25
   3  -3 -11    3.30    2.04
   3  -3 -11    4.05    1.71
   3  -3 -11    2.86    1.62
   3  -3 -10    0.10    1.33
   3  -3 -10    0.33    1.96
   3  -3 -10    0.17    1.79
   3  -3  -9  410.57   18.24
   3  -3  -9  390.07   17.48
   3  -3  -8    6.92    1.49
   3  -3  -8    5.43    1.98
   3  -3  -7   17.76    2.03
   3  -3  -7   14.89    2.42
   3  -3  -7   14.42    2.15
   3  -3  -6   54.12    3.47
   3  -3  -6   66.46    3.90
   3  -3  -6   65.37    4.20
   3  -3  -6   57.99    4.72
  -3   3   5   22.52    3.59
   3  -3  -5   18.89    1.70
   3  -3  -5   26.51    3.24
   3  -3  -4  366.69   18.33
  -3   3   4  376.43   18.84
  -3   3   3  218.93   12.33
  -3   3   2  525.56   25.09
   3  -3  -1  352.84   15.38
  -3   3   1  355.05   17.98
   3  -3   0  269.97   12.86
   3  -3   0  287.00   12.46
  -3   3   0  300.76   15.07
   3  -3   1  104.62    5.74
   3  -3   1  107.95    5.28
  -3   3  -1  120.08    7.67
   3  -3   2  419.35   20.10
   3  -3   2  465.41   19.42
  -3   3  -2  463.45   22.09
   3  -3   3  123.10    6.08
   3  -3   3  132.29    6.43
  -3   3  -3  128.21    8.35
   3  -3   4   12.36    2.71
  -3   3  -4   13.34    2.79
   3  -3   4   13.06    1.82
   3  -3   4   13.95    1.52
  -3   3  -5    5.64    1.66
   3  -3   5    4.42    1.58
   3  -3   5    4.18    2.00
   3  -3   5    8.72    2.80
  -3   3  -5    5.18    2.25
   3  -3   6   88.57    5.19
   3  -3   6   83.68    4.68
   3  -3   6  104.12    7.80
  -3   3  -6  103.37    5.39
   3  -3   7  443.62   20.78
   3  -3   7  473.26   23.86
  -3   3  -7  492.43   20.89
   3  -3   8    3.60    2.89
  -3   3  -8    3.26    1.87
  -3   3  -9   10.87    2.51
  -3   3  -9    9.42    2.06
  -3   3 -10   85.40    5.28
  -3   3 -10   86.53    5.73
  -3   3 -10   80.41    4.64
  -3   3 -11   20.12    2.37
  -3   3 -11   13.05    2.66
  -3   3 -12   11.56    1.98
   3  -2 -12   67.53    4.13
   3  -2 -11   16.19    2.54
   3  -2 -11   17.39    2.02
   3  -2 -10   11.15    2.07
   3  -2 -10    7.90    1.74
   3  -2 -10    7.81    2.08
   3  -2 -10    7.05    1.47
   3  -2  -9   42.41    3.22
   3  -2  -9   45.33    3.45
   3  -2  -8    1.60    1.70
   3  -2  -7   14.07    1.87
   3  -2  -7   13.83    2.30
  -3   2   6  268.69   12.16
   3  -2  -6  271.83   12.70
   3  -2  -6  269.52   12.10
  -3   2   5  130.36    7.62
   3  -2  -5  103.86    5.24
  -3   2   4 2061.26   88.04
  -3   2   3  283.02   14.62
  -3   2   2  101.26    6.82
  -3   2   1  684.71   31.12
  -3   2   0   96.22    6.55
   3  -2   1  297.90   12.87
   3  -2   2  614.13   27.24
  -3   2  -2  734.07   29.67
  -3   2  -3  231.24   11.64
  -3   2  -3  201.64    9.43
  -3   2  -4  859.70   38.20
   3  -2   4  855.10   36.26
   3  -2   5    2.25    1.54
  -3   2  -5    4.76    1.47
   3  -2   5    2.59    1.28
   3  -2   6   13.08    3.14
  -3   2  -6   18.12    2.09
   3  -2   6   14.06    1.93
  -3   2  -7   56.47    3.78
   3  -2   7   55.99    3.68
  -3   2  -7   50.51    3.91
   3  -2   7   62.59    5.63
  -3   2  -8   40.99    3.92
  -3   2  -8   39.91    3.27
  -3   2  -8   41.74    3.56
  -3   2  -8   44.73    3.59
  -3   2  -8   39.14    5.69
  -3   2  -9   95.48    5.89
  -3   2  -9   93.97    5.41
  -3   2  -9   94.33    5.75
  -3   2 -10  268.43   12.98
  -3   2 -10  267.65   12.33
  -3   2 -11   32.44    3.11
  -3   2 -11   36.05    3.58
  -3   2 -12   26.10    2.42
  -3   2 -12   30.03    2.87
   3  -1 -12   34.66    2.87
   3  -1 -11   27.45    2.44
   3  -1 -11   25.66    2.58
   3  -1 -11   23.65    2.22
   3  -1 -10   27.76    2.65
   3  -1 -10   25.18    2.71
   3  -1 -10   19.84    2.27
   3  -1  -9   54.88    3.80
  -3   1   9   46.95    3.48
   3  -1  -9   53.75    3.61
   3  -1  -8    0.86    1.66
  -3   1   8   -0.56    1.51
  -3   1   7   11.42    1.70
   3  -1  -7    9.57    1.72
  -3   1   6   99.12    4.91
   3  -1  -6   81.60    4.60
   3  -1  -5   28.98    2.03
  -3   1   5   29.30    2.25
  -3   1   4  479.82   22.46
  -3   1   3  601.76   27.59
  -3   1   2  114.38    7.25
  -3   1   1  705.72   31.77
  -3   1   0  237.95   12.22
   3  -1   0  232.74   12.43
   3  -1   1   19.36    3.13
  -3   1  -2 2390.18   64.91
   3  -1   2 2292.85   65.22
  -3   1  -3  517.67   23.97
  -3   1  -4  419.25   18.16
  -3   1  -5   16.20    1.76
  -3   1  -5   16.08    2.40
  -3   1  -5   16.32    1.82
  -3   1  -6   37.98    2.83
  -3   1  -7  114.63    5.98
  -3   1  -7  106.40    6.27
   3  -1   7  102.39    7.23
  -3   1  -7  115.21    6.35
  -3   1  -8   10.66    2.52
  -3   1  -8    9.99    2.31
  -3   1  -8   11.64    2.07
  -3   1  -8   10.75    3.73
  -3   1  -9   12.58    2.44
  -3   1  -9   15.97    2.28
  -3   1  -9   11.62    2.54
  -3   1  -9   19.52    4.36
  -3   1 -10  223.87   10.76
  -3   1 -10  237.77   11.37
  -3   1 -10  229.11   11.76
  -3   1 -11    4.24    2.00
  -3   1 -11    0.81    2.10
  -3   1 -12   70.50    4.16
  -3   1 -12   59.62    4.30
   3   0 -12   78.65    4.16
   3   0 -11   80.66    4.62
   3   0 -11   73.31    4.38
   3   0 -10   17.52    2.49
   3   0  -9   90.27    5.28
  -3   0   9   83.66    5.32
   3   0  -9   97.12    5.39
   3   0  -8   14.86    2.21
  -3   0   8   14.67    2.22
   3   0  -8   14.25    2.14
  -3   0   8   14.26    2.10
   3   0  -7   40.61    3.04
  -3   0   7   49.05    3.43
  -3   0   7   43.26    3.23
  -3   0   6  286.71   13.06
   3   0  -6  283.53   12.74
   3   0  -5  169.99    7.83
  -3   0   5  181.30    8.22
  -3   0   4   35.93    3.56
  -3   0   4   39.23    2.66
   3   0  -4   38.83    3.74
   3   0  -4   36.14    2.24
  -3   0   3  900.39   40.57
   3   0  -3  946.84   40.81
  -3   0   2   38.10    3.69
   3   0  -2   41.10    3.97
  -3   0   1  412.00   18.74
   3   0  -1  371.76   18.88
  -3   0   0  181.38    9.86
   3   0   1   30.18    3.33
  -3   0  -2 1788.91   74.34
   3   0   2 1694.44   74.60
  -3   0  -3  494.05   22.81
   3   0   3  494.18   23.21
  -3   0  -4 1106.02   45.54
   3   0   4 1099.22   45.93
  -3   0  -4 1006.95   43.80
  -3   0  -5  231.53   10.75
  -3   0  -5  250.57   12.02
  -3   0  -6  122.72    7.24
  -3   0  -6  148.03    6.87
  -3   0  -7  154.85    8.32
  -3   0  -7  170.57    8.14
  -3   0  -7  167.11    8.54
  -3   0  -7  157.25    8.30
  -3   0  -7  164.80    8.00
  -3   0  -8    4.15    1.66
  -3   0  -8    3.71    2.13
  -3   0  -8    5.02    2.11
  -3   0  -8    5.55    3.61
  -3   0  -8    2.78    1.68
  -3   0  -9    3.30    2.34
  -3   0  -9    2.90    1.99
  -3   0  -9    1.88    1.68
  -3   0  -9    3.36    2.35
  -3   0  -9    0.67    3.52
  -3   0 -10   24.82    2.88
  -3   0 -10   20.18    2.38
  -3   0 -10   25.44    3.35
  -3   0 -10   27.39    5.42
  -3   0 -11   47.46    3.63
  -3   0 -11   46.05    4.17
  -3   0 -12   46.84    3.40
  -3   0 -12   56.22    4.19
  -3   0 -13    4.32    1.65
   3   1 -12   22.62    2.00
   3   1 -12   21.51    1.93
   3   1 -11   92.33    4.88
   3   1 -11   77.48    4.72
  -3  -1   9   62.83    4.27
  -3  -1   9   65.83    4.54
  -3  -1   8   57.74    4.18
   3   1  -8   70.42    4.31
  -3  -1   8   56.66    4.24
  -3  -1   7  408.21   18.60
  -3  -1   7  415.91   18.73
  -3  -1   6  747.94   32.37
   3   1  -6  755.04   31.94
  -3  -1   6  746.25   32.45
   3   1  -5   89.09    4.59
  -3  -1   5   88.66    4.94
   3   1  -5   89.10    5.87
   3   1  -4   77.18    3.95
  -3  -1   4   76.52    5.40
  -3  -1   4   76.71    4.34
   3   1  -4   77.98    5.66
  -3  -1   3   34.11    3.59
  -3  -1   3   37.27    2.57
  -3  -1   2   32.91    3.50
   3   1  -2   36.79    3.81
  -3  -1   1  330.58   16.18
  -3  -1   0   46.49    4.07
  -3  -1   0   44.48    2.71
  -3  -1  -1   84.66    4.19
  -3  -1  -2  618.82   28.03
   3   1   3    5.37    2.36
  -3  -1  -3    3.93    1.88
  -3  -1  -4  397.36   18.92
   3   1   4  399.19   19.36
   3   1   5  791.00   37.09
  -3  -1  -5  838.66   35.26
  -3  -1  -5  843.47   35.23
  -3  -1  -5  823.56   36.67
  -3  -1  -6  860.98   35.62
  -3  -1  -6  785.86   36.38
  -3  -1  -6  845.19   35.61
  -3  -1  -7  280.48   12.84
  -3  -1  -7  289.64   13.45
  -3  -1  -7  262.05   13.10
  -3  -1  -7  276.95   13.16
  -3  -1  -7  275.28   16.76
  -3  -1  -7  296.80   12.96
  -3  -1  -8   83.41    4.76
  -3  -1  -8   77.88    5.30
  -3  -1  -8   73.55    5.06
  -3  -1  -8   85.87    5.31
  -3  -1  -8   73.47    7.81
  -3  -1  -8   81.65    4.81
  -3  -1  -9    7.68    1.87
  -3  -1  -9   10.96    2.53
  -3  -1  -9   10.98    2.18
  -3  -1  -9   13.30    2.69
  -3  -1  -9   10.00    4.20
  -3  -1 -10   58.83    4.62
  -3  -1 -10   51.30    3.90
  -3  -1 -10   57.19    4.68
  -3  -1 -11   31.06    2.84
  -3  -1 -11   23.82    2.44
  -3  -1 -11   28.58    3.66
  -3  -1 -12   37.68    3.82
  -3  -1 -13    1.75    1.41
  -3  -1 -13    3.09    1.84
   3   2 -12   24.45    1.88
   3   2 -12   22.38    1.87
   3   2 -11   12.29    1.91
  -3  -2  11   12.69    1.84
   3   2 -11   13.81    1.90
   3   2 -10   10.04    2.20
   3   2 -10    8.77    2.08
  -3  -2   9   49.31    3.88
   3   2  -9   47.16    3.87
   3   2  -9   50.07    3.75
  -3  -2   8   15.12    2.62
   3   2  -8   18.35    2.50
  -3  -2   8   13.91    2.55
   3   2  -8   13.86    2.38
  -3  -2   7  188.51    9.62
   3   2  -7  191.54    9.15
  -3  -2   7  177.89    9.45
  -3  -2   6  438.31   20.11
  -3  -2   6  456.25   20.19
  -3  -2   5  195.96    9.48
   3   2  -5  173.95   10.38
  -3  -2   5  198.82    9.44
  -3  -2   4  498.97   21.76
   3   2  -4  491.96   23.55
  -3  -2   4  496.53   23.19
  -3  -2   3  372.19   18.47
  -3  -2   3  385.07   16.85
  -3  -2   2   76.79    5.67
  -3  -2   1   14.30    2.65
  -3  -2   0  362.38   16.59
  -3  -2   0  369.99   17.93
  -3  -2  -1  755.38   31.86
  -3  -2  -1  704.13   33.27
  -3  -2  -2  955.68   41.08
  -3  -2  -2  976.41   42.63
  -3  -2  -3  177.77   10.03
  -3  -2  -4  125.62    7.30
  -3  -2  -4  109.43    5.62
  -3  -2  -5   27.99    2.31
  -3  -2  -5   27.31    3.23
  -3  -2  -5   30.43    2.21
  -3  -2  -5   28.79    2.24
  -3  -2  -6    7.22    3.19
  -3  -2  -6   10.98    1.65
   3   2   6    8.71    2.64
  -3  -2  -6   11.36    1.65
  -3  -2  -6   11.16    1.69
  -3  -2  -6    7.31    1.84
  -3  -2  -7   17.06    2.43
  -3  -2  -7   18.09    2.43
  -3  -2  -7   20.50    2.22
  -3  -2  -7   20.96    4.60
  -3  -2  -7   20.74    2.44
  -3  -2  -7   17.48    1.99
  -3  -2  -7   16.54    2.16
  -3  -2  -8  285.14   18.09
  -3  -2  -8  289.31   13.43
  -3  -2  -8  296.36   14.02
  -3  -2  -8  293.93   13.35
  -3  -2  -8  276.41   13.46
  -3  -2  -8  302.61   13.53
  -3  -2  -8  304.88   14.32
  -3  -2  -8  300.09   14.03
  -3  -2  -9   14.20    2.48
  -3  -2  -9   18.84    3.18
  -3  -2  -9   17.49    4.96
  -3  -2  -9   15.81    2.17
  -3  -2  -9   16.51    2.33
  -3  -2 -10  115.55    6.42
  -3  -2 -10   97.24    5.64
  -3  -2 -10  105.71    6.90
  -3  -2 -10  117.09    6.05
  -3  -2 -10   94.16   10.14
  -3  -2 -11   -0.97    2.42
  -3  -2 -12   11.99    2.71
  -3  -2 -13   23.44    2.46
  -3  -2 -13   25.24    2.75
   3   3 -11   48.22    3.02
  -3  -3  11   47.14    3.16
   3   3 -10    7.78    1.94
  -3  -3  10    8.28    2.21
   3   3 -10    8.91    1.85
   3   3  -9  115.56    6.36
   3   3  -9  112.24    6.17
  -3  -3   8  150.48    8.51
   3   3  -8  154.85    8.06
   3   3  -8  161.85    7.97
  -3  -3   7   64.26    4.69
   3   3  -7   65.09    4.14
   3   3  -7   62.03    4.10
  -3  -3   7   59.79    4.68
  -3  -3   6  202.53    9.90
  -3  -3   6  209.35   10.53
   3   3  -6  215.16    9.87
  -3  -3   6  215.40   10.54
   3   3  -6  199.49    9.84
  -3  -3   5   22.20    2.64
  -3  -3   5   26.88    2.82
  -3  -3   4  423.35   18.70
  -3  -3   4  400.67   20.12
  -3  -3   3    7.29    1.23
  -3  -3   3    5.50    2.11
  -3  -3   3    3.91    1.42
  -3  -3   2  779.44   32.56
  -3  -3   2  747.16   32.72
  -3  -3   2  786.28   35.02
  -3  -3   1  115.75    5.68
  -3  -3   1  112.40    5.70
  -3  -3   1  122.99    7.82
  -3  -3   0  130.17    7.43
  -3  -3   0  114.88    6.52
  -3  -3   0  128.30    8.24
  -3  -3   0  127.82    6.11
  -3  -3  -1  760.92   32.51
  -3  -3  -1  725.45   32.54
  -3  -3  -1  779.36   33.81
  -3  -3  -1  719.06   31.21
  -3  -3  -2 2757.66  112.90
  -3  -3  -2 2656.97  113.58
  -3  -3  -2 2673.15  111.62
  -3  -3  -3  353.24   17.56
  -3  -3  -3  361.68   17.79
  -3  -3  -3  336.16   15.25
  -3  -3  -3  355.26   15.28
  -3  -3  -4  679.79   30.77
  -3  -3  -4  705.77   31.84
  -3  -3  -4  660.28   28.45
  -3  -3  -4  666.35   28.48
  -3  -3  -5   30.76    3.63
  -3  -3  -5   38.12    4.79
  -3  -3  -5   30.44    2.25
  -3  -3  -5   35.49    2.45
  -3  -3  -6    1.05    1.24
  -3  -3  -6    1.54    0.89
  -3  -3  -6    2.35    1.90
  -3  -3  -6    1.61    1.49
  -3  -3  -7  329.21   13.97
  -3  -3  -7  273.52   13.19
  -3  -3  -7  286.12   13.63
  -3  -3  -7  287.30   13.75
  -3  -3  -7  287.86   17.67
  -3  -3  -7  272.69   12.97
  -3  -3  -7  297.98   13.83
  -3  -3  -8  218.17   10.62
  -3  -3  -8  231.04   11.39
  -3  -3  -8  229.46   15.63
  -3  -3  -8  219.79   10.35
  -3  -3  -9  285.60   13.17
  -3  -3  -9  291.06   13.91
  -3  -3  -9  285.99   14.04
  -3  -3  -9  264.99   13.61
  -3  -3  -9  269.95   18.36
  -3  -3  -9  282.91   12.78
  -3  -3 -10    4.48    2.26
  -3  -3 -10    2.11    2.03
  -3  -3 -10    2.49    3.83
  -3  -3 -11    0.19    1.79
  -3  -3 -11    3.92    2.14
  -3  -3 -12   27.98    2.83
  -3  -3 -13    1.90    1.81
  -3  -3 -13    0.81    1.62
   3   4 -11    8.54    1.35
  -3  -4  11    9.70    1.42
   3   4 -11   12.16    1.36
   3   4 -10   10.82    1.77
  -3  -4  10   10.95    2.09
   3   4 -10   12.60    1.75
  -3  -4   9  124.58    7.25
   3   4  -9  128.79    6.61
   3   4  -8   23.36    2.60
   3   4  -8   18.78    2.50
  -3  -4   8   25.35    3.26
   3   4  -7   26.72    2.73
  -3  -4   7   23.61    3.34
   3   4  -7   21.55    2.65
  -3  -4   6  169.76    8.85
   3   4  -6  183.84    8.71
  -3  -4   6  170.26    9.37
   3   4  -6  181.44    8.69
  -3  -4   6  170.67    9.46
  -3  -4   5   15.20    2.59
   3   4  -5   14.48    1.97
  -3  -4   5   15.99    2.27
  -3  -4   4   39.72    4.44
  -3  -4   4   40.27    3.27
  -3  -4   4   36.22    3.37
  -3  -4   3   33.77    4.23
  -3  -4   3   34.08    2.50
  -3  -4   3   37.14    2.94
  -3  -4   2   74.30    6.40
  -3  -4   2   71.85    4.39
  -3  -4   2   74.92    4.21
  -3  -4   2   70.04    4.24
  -3  -4   1  337.17   14.85
  -3  -4   1  334.18   14.99
  -3  -4   1  335.35   17.53
  -3  -4   1  344.62   17.14
  -3  -4   1  328.69   14.91
  -3  -4   0   68.37    3.80
  -3  -4   0   62.44    3.81
  -3  -4   0   60.95    5.70
  -3  -4   0   71.18    5.55
  -3  -4  -1  360.66   16.25
  -3  -4  -1  363.26   17.53
  -3  -4  -1  372.86   18.91
  -3  -4  -1  383.20   18.08
  -3  -4  -2   31.62    3.61
  -3  -4  -2   24.61    3.20
  -3  -4  -3   51.60    3.31
  -3  -4  -3   53.15    5.14
  -3  -4  -3   55.28    5.25
  -3  -4  -3   50.84    4.61
  -3  -4  -4  128.15    6.44
  -3  -4  -4  126.27    9.19
  -3  -4  -4  128.79    8.59
  -3  -4  -5   64.29    6.56
  -3  -4  -5   60.60    5.38
  -3  -4  -5   53.28    3.33
  -3  -4  -6  199.48    9.93
  -3  -4  -6  207.10   10.48
  -3  -4  -6  219.22   10.27
  -3  -4  -6  195.72    9.70
  -3  -4  -6  228.71   10.37
  -3  -4  -6  220.04   10.44
  -3  -4  -6  233.22   10.67
  -3  -4  -6  210.92   14.05
  -3  -4  -6  211.77   12.17
  -3  -4  -6  210.52   10.45
  -3  -4  -7  310.35   15.04
  -3  -4  -7  338.87   15.68
  -3  -4  -7  329.71   15.27
  -3  -4  -7  328.13   15.63
  -3  -4  -7  357.20   15.76
  -3  -4  -7  323.15   15.55
  -3  -4  -7  341.89   15.43
  -3  -4  -8   82.76    5.19
  -3  -4  -8   91.71    5.36
  -3  -4  -8   81.03    5.70
  -3  -4  -8   93.73    5.94
  -3  -4  -8   84.21    5.69
  -3  -4  -8   85.02    5.48
  -3  -4  -9   78.00    5.45
  -3  -4  -9   70.09    5.01
  -3  -4  -9   75.53    4.77
  -3  -4  -9   74.66    4.90
  -3  -4  -9   71.53    5.26
  -3  -4  -9   75.85    5.36
  -3  -4  -9   65.04    8.59
  -3  -4 -10   25.31    5.86
  -3  -4 -10   28.74    3.14
  -3  -4 -10   29.36    3.67
  -3  -4 -10   33.53    3.52
  -3  -4 -11   73.99    4.73
  -3  -4 -11   67.42    5.27
  -3  -4 -11   71.66    4.97
  -3  -4 -12    9.36    1.91
  -3  -4 -12    8.50    2.42
  -3  -4 -12   11.33    2.56
  -3  -4 -13   28.23    2.20
  -3  -4 -13   24.52    2.49
  -3  -4 -13   24.81    2.63
   3   5 -10   10.85    1.41
  -3  -5  10   10.86    1.73
   3   5 -10   10.46    1.45
   3   5  -9   89.10    4.62
  -3  -5   9   81.45    5.20
   3   5  -9   76.07    4.63
  -3  -5   8   15.64    2.94
   3   5  -8   19.57    2.34
   3   5  -7   38.94    3.18
   3   5  -7   33.40    2.83
  -3  -5   6   88.05    6.01
   3   5  -6   88.30    5.10
  -3  -5   6   86.16    5.28
   3   5  -6   80.21    4.81
  -3  -5   5   21.76    2.63
   3   5  -5   18.96    2.04
  -3  -5   5   18.95    2.97
  -3  -5   4  115.70    6.51
  -3  -5   4   96.21    8.13
   3   5  -4  114.39    5.67
  -3  -5   3  167.72   11.32
  -3  -5   3  172.10    8.56
  -3  -5   3  186.04    9.16
  -3  -5   3  172.77    8.98
  -3  -5   2  113.14    6.01
  -3  -5   2  114.82    8.55
  -3  -5   2  103.46    5.76
  -3  -5   2  109.42    8.51
  -3  -5   2  107.69    6.14
  -3  -5   1  513.08   23.12
  -3  -5   1  505.04   26.35
  -3  -5   1  522.81   23.35
  -3  -5   1  594.76   26.61
  -3  -5   1  551.72   23.28
  -3  -5   0    5.19    1.57
  -3  -5   0    4.67    2.74
  -3  -5   0    5.44    2.86
  -3  -5   0    3.41    1.39
  -3  -5   0    5.35    1.31
  -3  -5  -1  189.71    8.86
  -3  -5  -1  194.80   12.03
  -3  -5  -1  166.11   10.02
  -3  -5  -1  190.70    9.12
  -3  -5  -1  211.14   11.45
  -3  -5  -2    1.77    2.36
  -3  -5  -2    3.95    2.35
  -3  -5  -3  129.60    9.47
  -3  -5  -3  122.64    9.07
  -3  -5  -3  141.54    7.07
  -3  -5  -3  131.12    8.77
  -3  -5  -3  134.52    6.86
  -3  -5  -4  284.20   13.52
  -3  -5  -4  301.96   13.47
  -3  -5  -4  294.60   16.75
  -3  -5  -4  290.34   16.30
  -3  -5  -4  275.39   13.41
  -3  -5  -4  304.25   13.63
  -3  -5  -4  278.76   13.19
  -3  -5  -5   45.75    6.15
  -3  -5  -5   46.08    3.23
  -3  -5  -5   48.33    3.48
  -3  -5  -5   44.69    3.57
  -3  -5  -5   39.77    2.99
  -3  -5  -5   43.23    2.91
  -3  -5  -5   43.69    5.29
  -3  -5  -5   47.44    3.58
  -3  -5  -5   51.69    3.77
  -3  -5  -6   54.92    5.83
  -3  -5  -6   52.60    7.04
  -3  -5  -6   61.64    3.78
  -3  -5  -6   61.23    4.45
  -3  -5  -6   59.85    3.87
  -3  -5  -6   55.52    3.54
  -3  -5  -6   65.21    4.41
  -3  -5  -6   66.14    4.50
  -3  -5  -6   60.12    4.14
  -3  -5  -6   59.67    4.16
  -3  -5  -6   62.28    4.28
  -3  -5  -7  136.98    7.08
  -3  -5  -7  141.72    7.47
  -3  -5  -7  108.94    8.67
  -3  -5  -7  126.81    6.64
  -3  -5  -7  135.81    7.47
  -3  -5  -7  129.87    7.30
  -3  -5  -7  132.23    6.67
  -3  -5  -7  152.87   12.00
  -3  -5  -7  142.87    7.91
  -3  -5  -7  156.31    7.92
  -3  -5  -8    3.11    2.20
  -3  -5  -8    3.27    2.09
  -3  -5  -8    2.17    1.98
  -3  -5  -8    4.79    1.88
  -3  -5  -8    7.46    4.34
  -3  -5  -8    0.24    2.31
  -3  -5  -8    7.11    2.60
  -3  -5  -9  142.87    7.74
  -3  -5  -9  150.10    8.00
  -3  -5  -9  150.23    8.47
  -3  -5  -9  157.76    8.69
  -3  -5  -9  141.38    8.36
  -3  -5  -9  143.95    8.03
  -3  -5 -10   21.57    3.15
  -3  -5 -10   18.76    2.82
  -3  -5 -10   21.48    3.09
  -3  -5 -10   21.53    2.63
  -3  -5 -11   24.06    2.99
  -3  -5 -11   22.56    2.58
  -3  -5 -11   26.24    3.17
  -3  -5 -12    2.95    1.55
  -3  -5 -12    0.81    1.78
  -3  -5 -13    1.81    1.41
  -3  -5 -13    1.33    1.36
  -3  -5 -13    1.78    1.11
  -3  -6   9   32.71    2.78
   3   6  -9   29.76    2.24
   3   6  -8   24.35    2.20
  -3  -6   8   18.12    2.69
   3   6  -8   24.47    2.22
   3   6  -7   39.12    3.06
  -3  -6   6   11.14    2.33
   3   6  -6   16.50    2.36
  -3  -6   6   10.13    2.70
  -3  -6   6    9.69    4.73
   3   6  -5   36.95    3.28
  -3  -6   5   38.96    3.58
  -3  -6   5   35.88    6.34
  -3  -6   4   48.55    3.98
  -3  -6   4   38.07    6.27
  -3  -6   4   39.47    4.05
  -3  -6   3    4.92    3.14
  -3  -6   3    8.41    4.25
  -3  -6   3    9.96    1.98
  -3  -6   3    7.79    2.44
  -3  -6   3    9.21    2.60
  -3  -6   2    4.47    3.74
  -3  -6   2   10.94    2.28
  -3  -6   2   10.84    2.33
  -3  -6   2    9.88    2.05
  -3  -6   1  317.08   15.62
  -3  -6   1  349.08   15.64
  -3  -6   1  323.05   19.12
  -3  -6   0  307.49   18.26
  -3  -6   0  360.65   18.16
  -3  -6   0  314.06   14.64
  -3  -6   0  314.84   14.76
  -3  -6   0  317.63   14.92
  -3  -6  -1  108.80    6.34
  -3  -6  -1  123.70    8.81
  -3  -6  -1  117.10    6.12
  -3  -6  -1  114.97    6.44
  -3  -6  -1  124.35    6.44
  -3  -6  -1  117.93    9.50
  -3  -6  -2  229.67   10.81
  -3  -6  -2  206.15   10.40
  -3  -6  -2  218.24   10.60
  -3  -6  -3   67.21    7.14
  -3  -6  -3   50.64    5.86
  -3  -6  -3   62.30    4.28
  -3  -6  -3   75.37    6.58
  -3  -6  -3   74.34    4.62
  -3  -6  -3   65.81    4.44
  -3  -6  -3   59.54    4.15
  -3  -6  -3   65.99    4.26
  -3  -6  -3   64.00    4.10
  -3  -6  -4    6.25    3.37
  -3  -6  -4    3.94    1.69
  -3  -6  -4    3.38    3.04
  -3  -6  -4    4.22    1.91
  -3  -6  -4    6.21    1.54
  -3  -6  -4    3.79    1.81
  -3  -6  -4    3.94    1.82
  -3  -6  -4    3.54    1.81
  -3  -6  -5   56.11    6.46
  -3  -6  -5   59.19    7.13
  -3  -6  -5   67.27    4.17
  -3  -6  -5   64.68    4.00
  -3  -6  -5   68.15    4.66
  -3  -6  -5   62.58    4.38
  -3  -6  -5   66.14    4.67
  -3  -6  -5   53.22    4.28
  -3  -6  -6    0.73    3.43
  -3  -6  -6    2.01    1.56
  -3  -6  -6    3.20    2.83
  -3  -6  -6    1.30    1.39
  -3  -6  -6    0.61    1.99
  -3  -6  -6    2.56    2.01
  -3  -6  -6    1.62    1.74
  -3  -6  -6   -0.22    1.94
  -3  -6  -6    3.92    2.10
  -3  -6  -6   -1.15    1.84
  -3  -6  -6    1.19    1.17
  -3  -6  -7  182.51   13.84
  -3  -6  -7  142.57   10.98
  -3  -6  -7  175.60    9.36
  -3  -6  -7  174.36    9.63
  -3  -6  -7  182.99    9.28
  -3  -6  -7  175.50    8.65
  -3  -6  -7  168.27    8.39
  -3  -6  -7  166.44    8.37
  -3  -6  -7  160.71    8.75
  -3  -6  -7  191.97    9.09
  -3  -6  -8   52.36    3.91
  -3  -6  -8   41.17    3.70
  -3  -6  -8   46.72    3.60
  -3  -6  -8   47.49    3.20
  -3  -6  -8   52.39    4.39
  -3  -6  -9   17.80    2.41
  -3  -6  -9   13.42    5.07
  -3  -6  -9   17.14    2.58
  -3  -6  -9   16.67    2.61
  -3  -6  -9   16.13    3.04
  -3  -6  -9   13.22    3.01
  -3  -6  -9   17.99    2.94
  -3  -6 -10    6.47    1.94
  -3  -6 -10    2.41    2.18
  -3  -6 -10    5.44    2.01
  -3  -6 -10    3.47    2.08
  -3  -6 -10    3.68    2.23
  -3  -6 -10    5.72    2.26
  -3  -6 -11    7.66    2.16
  -3  -6 -11    8.98    1.86
  -3  -6 -11    5.38    2.09
  -3  -6 -12    6.94    1.84
   3   7  -8   14.03    1.51
   3   7  -7    3.89    1.47
  -3  -7   7    3.62    1.87
   3   7  -6   26.82    2.58
  -3  -7   6   26.69    3.04
   3   7  -5    0.64    1.79
  -3  -7   5    2.12    2.10
  -3  -7   4  254.19   12.73
  -3  -7   4  276.53   16.89
  -3  -7   4  263.14   12.90
  -3  -7   3   39.20    3.58
  -3  -7   3   37.70    3.24
  -3  -7   3   45.28    3.96
  -3  -7   2   25.47    2.81
  -3  -7   2   22.24    2.62
  -3  -7   2   19.75    4.82
  -3  -7   2   26.62    5.49
  -3  -7   2   28.03    3.29
  -3  -7   1   32.53    2.91
  -3  -7   1   42.06    3.46
  -3  -7   1   40.06    5.96
  -3  -7   0    8.54    2.19
  -3  -7   0    6.72    4.03
  -3  -7   0   11.96    4.10
  -3  -7   0   14.49    2.62
  -3  -7  -1  627.71   28.83
  -3  -7  -1  555.58   24.99
  -3  -7  -1  550.87   25.08
  -3  -7  -1  545.33   29.37
  -3  -7  -2   38.73    3.46
  -3  -7  -2   34.79    3.50
  -3  -7  -2   39.83    3.47
  -3  -7  -2   32.62    5.85
  -3  -7  -2   44.09    5.75
  -3  -7  -3    2.65    3.41
  -3  -7  -3    1.03    3.12
  -3  -7  -3    2.53    1.79
  -3  -7  -3    1.59    1.99
  -3  -7  -3    3.26    1.69
  -3  -7  -3    4.37    1.92
  -3  -7  -3    1.71    1.99
  -3  -7  -3    2.84    2.10
  -3  -7  -4   13.70    4.66
  -3  -7  -4   24.35    3.06
  -3  -7  -4   17.55    2.23
  -3  -7  -4   19.78    2.76
  -3  -7  -4   13.33    2.35
  -3  -7  -4   26.06    2.77
  -3  -7  -4   20.45    2.91
  -3  -7  -5   25.07    2.89
  -3  -7  -5   26.66    2.92
  -3  -7  -5   26.91    3.31
  -3  -7  -5   28.49    3.13
  -3  -7  -5   30.95    3.26
  -3  -7  -5   29.55    3.43
  -3  -7  -5   29.78    5.30
  -3  -7  -6    7.80    3.53
  -3  -7  -6   10.97    2.25
  -3  -7  -6   11.11    4.35
  -3  -7  -6    8.62    2.36
  -3  -7  -6   10.56    2.52
  -3  -7  -6    8.28    2.52
  -3  -7  -6    8.82    2.02
  -3  -7  -7    0.65    1.88
  -3  -7  -7    4.71    4.04
  -3  -7  -7    3.06    2.12
  -3  -7  -7   -0.42    2.24
  -3  -7  -7   -0.82    1.64
  -3  -7  -7    1.38    1.77
  -3  -7  -8   88.13    5.26
  -3  -7  -8   82.60    5.28
  -3  -7  -8   84.00    5.74
  -3  -7  -8   78.79    5.78
  -3  -7  -9    9.29    2.67
  -3  -7  -9    9.63    2.52
  -3  -7  -9    7.09    2.02
  -3  -7  -9    7.22    2.12
  -3  -7 -10   15.12    2.45
  -3  -7 -10   14.44    2.39
  -3  -7 -10   10.95    2.23
  -3  -7 -11    2.70    1.64
  -3  -8   6    6.62    1.71
   3   8  -6    9.57    1.47
  -3  -8   5    0.30    1.70
   3   8  -5    3.10    1.53
  -3  -8   4    6.38    2.05
   3   8  -4    5.83    1.91
  -3  -8   3   80.66    5.03
  -3  -8   3   81.16    4.80
  -3  -8   3   80.93    5.43
  -3  -8   2   67.80    4.30
  -3  -8   2   50.52    3.85
  -3  -8   2   63.15    7.23
  -3  -8   2   62.68    4.73
  -3  -8   1  101.07    9.66
  -3  -8   1   98.85    9.09
  -3  -8   1   98.11    5.96
  -3  -8   0  282.68   16.51
  -3  -8   0  240.74   16.69
  -3  -8   0  274.44   13.07
  -3  -8   0  250.92   12.76
  -3  -8  -1    1.46    3.50
  -3  -8  -1    1.15    3.53
  -3  -8  -1    0.19    2.01
  -3  -8  -1    3.25    2.25
  -3  -8  -2    8.25    2.08
  -3  -8  -2    8.63    2.57
  -3  -8  -2    9.13    2.22
  -3  -8  -2    8.72    4.32
  -3  -8  -2    3.94    3.70
  -3  -8  -3   55.57    4.42
  -3  -8  -3   76.75    4.69
  -3  -8  -3   70.66    5.09
  -3  -8  -3   76.77    5.05
  -3  -8  -3   56.47    7.53
  -3  -8  -4  117.12    6.67
  -3  -8  -4  103.61   10.37
  -3  -8  -4  117.38    6.89
  -3  -8  -4  123.40    7.08
  -3  -8  -4  106.55    6.53
  -3  -8  -4  111.47    6.41
  -3  -8  -5   47.97    3.83
  -3  -8  -5   48.84    3.65
  -3  -8  -5   35.92    6.33
  -3  -8  -5   51.47    4.16
  -3  -8  -5   47.95    4.24
  -3  -8  -5   43.79    3.90
  -3  -8  -5   40.81    3.76
  -3  -8  -6    1.24    1.88
  -3  -8  -6   -1.35    2.14
  -3  -8  -6   -0.15    1.76
  -3  -8  -6    0.16    1.73
  -3  -8  -6    0.62    2.50
  -3  -8  -7   19.74    2.30
  -3  -8  -7   22.58    2.95
  -3  -8  -7   25.36    3.11
  -3  -8  -7   21.72    2.52
  -3  -8  -8    4.22    2.09
  -3  -8  -8    3.23    2.27
  -3  -8  -9    6.52    2.07
  -3  -8  -9    8.12    2.10
  -3  -8 -10   10.87    1.82
   3   9  -5    9.37    1.25
   3   9  -4   29.72    2.26
  -3  -9   2    2.40    1.53
  -3  -9   1   20.66    2.59
  -3  -9   0   29.42    3.04
  -3  -9  -1  157.90    8.44
  -3  -9  -2   27.72    3.33
  -3  -9  -2   31.38    3.25
  -3  -9  -3    3.15    1.86
  -3  -9  -3    2.36    2.29
  -3  -9  -4   20.52    2.67
  -3  -9  -4   26.67    3.27
  -3  -9  -4   29.75    3.14
  -3  -9  -5    7.00    2.17
  -3  -9  -5    6.41    2.53
  -3  -9  -5    7.93    1.97
  -3  -9  -6    3.85    2.13
  -3  -9  -6    3.02    2.13
  -3  -9  -6    5.07    1.73
  -3  -9  -7   -0.15    1.79
  -3  -9  -8   -0.68    1.80
  -3  -9  -9   31.98    2.59
  -3 -10   2    0.99    1.27
   3  10  -2    1.00    1.08
  -3 -10   1   16.56    2.03
  -3 -10   1   17.96    1.93
  -3 -10   0    2.52    1.73
  -3 -10   0    3.67    1.53
  -3 -10  -1    6.09    1.88
  -3 -10  -1    6.22    1.81
  -3 -10  -2   33.54    3.17
  -3 -10  -2   37.06    3.06
  -3 -10  -3    7.53    2.07
  -3 -10  -4    5.95    1.53
  -3 -10  -4   11.59    2.21
  -3 -10  -4   12.99    2.03
  -3 -10  -5   10.77    1.79
  -3 -10  -5   10.38    2.09
  -3 -10  -5    8.82    1.77
  -3 -10  -6    2.29    1.40
  -3 -10  -6    1.55    1.59
  -3 -10  -6    0.19    1.17
  -3 -10  -7    1.97    1.27
   4 -10  -5    6.89    1.50
   4 -10  -4    0.21    1.35
  -4  10   4    0.93    1.22
   4 -10  -4    2.02    1.28
   4 -10  -3  102.45    5.33
   4 -10  -3   96.94    5.35
   4 -10  -2    7.04    1.70
   4 -10  -2    5.98    1.62
   4 -10  -1    1.84    1.40
  -4  10   1    1.89    1.11
   4 -10  -1    3.95    1.73
   4 -10   0   14.85    1.82
   4 -10   0    9.01    1.31
   4 -10   0   12.78    2.03
  -4  10   0    9.55    1.49
   4 -10   1    2.07    1.16
  -4  10  -1    1.25    1.15
  -4  10  -1    1.01    1.14
   4  -9  -7   -0.11    1.32
   4  -9  -7    1.09    1.00
   4  -9  -7    0.83    1.14
  -4   9   6    7.00    1.45
   4  -9  -6    7.65    1.36
   4  -9  -6    7.25    1.43
   4  -9  -5   14.91    1.99
   4  -9  -5   13.17    1.71
   4  -9  -4   13.17    1.67
   4  -9  -4   12.35    2.24
   4  -9  -3   32.05    3.12
   4  -9  -3   30.12    2.99
   4  -9  -2    2.24    2.03
   4  -9  -1    5.26    2.15
   4  -9  -1    4.42    2.18
   4  -9   0    6.55    2.37
   4  -9   0   10.08    2.21
  -4   9   0    3.45    1.67
   4  -9   1    1.88    1.72
  -4   9  -1    4.04    1.79
   4  -9   2   41.42    3.04
   4  -9   2   31.87    2.81
  -4   9  -2   39.31    3.02
  -4   9  -3   -0.24    1.56
   4  -9   3    2.83    1.51
   4  -9   3    0.59    1.24
  -4   9  -4    6.16    1.61
   4  -9   4    6.54    1.39
   4  -8  -9   12.28    1.38
   4  -8  -9    8.17    1.53
   4  -8  -9   10.71    1.50
   4  -8  -8   48.95    2.95
   4  -8  -8   41.72    3.15
   4  -8  -8   44.73    3.05
   4  -8  -7    3.09    1.49
   4  -8  -7    3.01    1.73
   4  -8  -7    2.46    1.51
  -4   8   6   34.99    3.03
   4  -8  -6   43.70    3.02
   4  -8  -6   41.31    3.11
   4  -8  -6   34.59    3.05
   4  -8  -5   48.80    3.43
   4  -8  -5   42.91    3.56
   4  -8  -5   42.19    3.35
   4  -8  -4   26.67    2.99
   4  -8  -4   24.27    2.48
   4  -8  -3   37.87    3.46
  -4   8   3   41.67    6.43
   4  -8  -3   41.07    3.64
   4  -8  -3   37.58    2.91
  -4   8   2  105.48   10.53
   4  -8  -2  136.91    7.47
   4  -8  -1   41.66    3.70
   4  -8   0   46.14    3.91
  -4   8   0   44.14    6.59
   4  -8   1   13.39    2.42
  -4   8  -1   13.07    4.21
   4  -8   2    3.59    2.11
   4  -8   3    9.21    2.00
  -4   8  -3   10.54    2.32
   4  -8   3    8.07    1.90
   4  -8   4    1.13    1.67
  -4   8  -4    4.52    1.97
   4  -8   4    2.08    1.29
   4  -8   5   60.76    3.72
  -4   8  -6   30.56    2.57
   4  -8   6   30.53    2.21
   4  -7 -10    1.78    1.11
   4  -7 -10    1.18    1.31
   4  -7  -9    0.77    1.25
   4  -7  -9    1.24    1.65
   4  -7  -8    5.82    1.69
   4  -7  -8    5.33    1.93
   4  -7  -8    4.96    1.85
   4  -7  -7   26.73    2.62
   4  -7  -7   29.38    2.86
   4  -7  -7   27.46    3.04
   4  -7  -6  102.60    5.52
   4  -7  -6   95.21    5.71
   4  -7  -6   97.47    5.90
   4  -7  -6   93.55    5.59
   4  -7  -5   96.50    5.86
   4  -7  -5  103.48    5.89
   4  -7  -5   91.69    5.78
  -4   7   5  111.85    9.77
   4  -7  -5  107.47    5.68
   4  -7  -5  105.97    6.05
   4  -7  -4   22.12    2.82
   4  -7  -4   23.50    2.77
  -4   7   4   26.24    5.71
   4  -7  -4   23.41    2.45
   4  -7  -4   19.66    2.56
   4  -7  -3   92.83    5.79
   4  -7  -3  113.27    9.67
  -4   7   3   96.24    9.64
   4  -7  -3   90.65    5.71
  -4   7   2    5.08    3.74
  -4   7   1   22.40    5.13
   4  -7  -1   22.33    2.96
   4  -7  -1   28.15    3.14
   4  -7  -1   20.75    5.00
   4  -7  -1   16.63    3.72
  -4   7   0  343.90   21.39
   4  -7   0  382.87   17.25
   4  -7   0  365.21   21.53
   4  -7   0  358.63   20.10
   4  -7   1    2.82    3.09
  -4   7  -1   11.24    4.22
   4  -7   1    7.41    2.37
   4  -7   1    2.04    3.33
   4  -7   1    6.32    2.16
   4  -7   2   26.00    5.18
  -4   7  -2   26.55    5.42
   4  -7   2   36.13    3.35
   4  -7   2   39.70    3.40
   4  -7   3   17.51    4.46
  -4   7  -3   16.05    4.27
  -4   7  -3   21.27    2.92
   4  -7   3   17.10    2.56
   4  -7   3   20.06    2.54
  -4   7  -4   56.20    4.22
   4  -7   4   52.07    3.87
   4  -7   5    2.48    1.67
   4  -7   6    1.98    1.43
  -4   7  -6    4.81    2.06
   4  -7   7  136.59    6.67
  -4   7  -7  149.43    7.23
  -4   7  -8   68.74    3.83
   4  -6 -11   28.64    1.98
   4  -6 -11   24.90    2.17
   4  -6 -10    5.56    1.54
   4  -6 -10    4.37    1.68
   4  -6  -9   11.88    1.96
   4  -6  -9   12.92    2.50
   4  -6  -9   10.14    2.16
   4  -6  -8   13.23    2.13
   4  -6  -8    8.69    2.45
   4  -6  -8   10.86    2.24
   4  -6  -7   14.63    2.27
   4  -6  -7   14.64    2.42
   4  -6  -7   15.58    2.71
  -4   6   6    1.21    1.66
   4  -6  -6    1.10    1.60
   4  -6  -6    0.66    1.89
   4  -6  -6    3.19    1.57
   4  -6  -6    2.70    1.58
  -4   6   5    1.30    3.76
   4  -6  -5    0.56    2.79
   4  -6  -5    1.47    1.56
   4  -6  -5    3.95    1.82
   4  -6  -5    0.91    1.65
   4  -6  -5   -0.16    1.62
  -4   6   4   18.77    4.96
   4  -6  -4   19.11    4.67
   4  -6  -4   14.42    2.05
   4  -6  -4   15.30    2.29
   4  -6  -4   16.35    2.22
   4  -6  -4   16.71    2.34
  -4   6   3  141.39   11.06
   4  -6  -3  111.70    9.79
   4  -6  -3  128.19    6.39
   4  -6  -3  125.94    6.85
   4  -6  -3  118.95    6.48
   4  -6  -3  119.35    6.89
   4  -6  -2    2.34    1.36
   4  -6  -2    3.13    3.33
   4  -6  -2    2.07    1.90
   4  -6  -2   -0.83    2.59
  -4   6   2    2.01    3.61
   4  -6  -1  459.79   25.07
   4  -6  -1  474.17   21.12
   4  -6  -1  452.07   23.59
  -4   6   1  466.67   25.41
   4  -6   0  179.12    8.61
   4  -6   0  160.33   12.18
   4  -6   0  151.81   11.02
   4  -6   0  159.75    8.63
  -4   6  -1   11.80    4.04
   4  -6   1   10.99    2.16
   4  -6   1    7.59    3.72
   4  -6   1    7.02    3.75
   4  -6   1    5.35    2.03
  -4   6  -2  167.48   12.68
   4  -6   2  184.31    8.99
   4  -6   2  181.07   12.81
   4  -6   2  169.13   12.21
   4  -6   2  173.53    9.05
   4  -6   3  126.07    6.62
   4  -6   3  124.11    6.66
  -4   6  -3  105.38    9.65
  -4   6  -4   14.67    2.73
   4  -6   4   20.87    2.52
   4  -6   4   21.86    4.96
   4  -6   4   21.38    2.39
  -4   6  -4   11.23    3.82
  -4   6  -5   18.33    2.14
   4  -6   5   17.39    4.40
   4  -6   5   19.39    2.46
  -4   6  -6   17.23    2.10
  -4   6  -6   21.26    2.90
   4  -6   6   18.28    2.18
  -4   6  -7    4.57    1.56
  -4   6  -7    4.53    2.15
   4  -6   7    4.95    1.42
  -4   6  -8   45.47    3.06
  -4   6  -8   47.80    3.36
  -4   6  -9   12.39    1.47
  -4   6  -9   16.91    1.74
   4  -5 -11   54.34    3.55
   4  -5 -11   52.76    3.44
   4  -5 -11   63.12    3.45
   4  -5 -10    4.10    1.81
   4  -5 -10    1.52    1.52
   4  -5  -9   60.83    4.15
   4  -5  -9   52.99    3.82
   4  -5  -8  217.12   10.63
   4  -5  -8  209.10   10.31
   4  -5  -7    3.03    2.00
   4  -5  -7    2.02    1.79
   4  -5  -6   16.42    2.21
  -4   5   6   16.11    2.19
   4  -5  -6   14.81    2.30
   4  -5  -6   13.16    1.88
   4  -5  -6   20.04    3.73
   4  -5  -5   11.40    1.90
   4  -5  -5   14.67    3.59
  -4   5   5   10.08    3.98
   4  -5  -5    9.41    1.85
   4  -5  -5   10.94    2.00
   4  -5  -4    7.46    1.59
   4  -5  -4    3.17    2.90
   4  -5  -4    5.17    1.60
  -4   5   4    2.40    3.33
   4  -5  -4    5.84    1.69
   4  -5  -4    4.75    1.72
   4  -5  -3    3.60    1.26
  -4   5   3    7.15    3.31
   4  -5  -3    4.29    1.66
   4  -5  -3    2.90    1.38
   4  -5  -3    1.62    2.83
  -4   5   2    5.30    3.77
   4  -5  -2    2.02    1.55
   4  -5  -2    1.63    2.56
  -4   5   1  373.52   20.90
   4  -5   0  677.36   28.04
   4  -5   0  615.74   28.13
   4  -5   0  627.77   31.86
   4  -5   1    8.90    1.90
   4  -5   1    8.27    1.82
  -4   5  -1    6.95    3.84
   4  -5   1    2.76    2.94
   4  -5   2  129.34    7.10
   4  -5   2  127.95    9.94
   4  -5   2  135.79    6.94
  -4   5  -2  138.58   10.50
   4  -5   3   19.37    2.41
   4  -5   3   16.37    4.16
   4  -5   3   25.56    4.87
  -4   5  -3   18.98    4.60
   4  -5   3   25.97    2.52
  -4   5  -4   59.71    6.68
   4  -5   4   75.14    7.52
  -4   5  -4   71.51    4.63
  -4   5  -4   64.74    3.97
   4  -5   4   57.09    6.45
   4  -5   4   63.78    4.17
   4  -5   4   66.98    4.25
   4  -5   5  515.84   21.00
   4  -5   5  522.99   25.86
  -4   5  -5  476.94   20.89
   4  -5   6   78.32    4.65
   4  -5   6   76.14    8.05
  -4   5  -6   82.55    4.85
  -4   5  -7  159.94    7.95
   4  -5   7  138.30   10.82
  -4   5  -7  138.01    7.48
  -4   5  -8  102.81    5.72
  -4   5  -8  111.23    6.39
  -4   5  -9   -0.23    1.51
  -4   5  -9    2.19    1.59
  -4   5 -10    2.31    1.23
   4  -4 -12   32.64    2.21
   4  -4 -12   35.09    2.29
   4  -4 -11   20.02    2.25
   4  -4 -11   23.92    2.31
   4  -4 -11   27.03    2.35
   4  -4 -10   18.30    2.37
   4  -4 -10   12.36    2.23
   4  -4  -9  163.94    8.38
   4  -4  -8  232.79   10.76
   4  -4  -8  212.69    9.96
   4  -4  -7   11.19    2.13
   4  -4  -6    3.36    1.67
   4  -4  -6    5.99    2.56
  -4   4   5   10.24    1.91
   4  -4  -5   11.34    1.75
   4  -4  -5    6.15    2.76
  -4   4   5   11.54    3.62
   4  -4  -5   11.55    1.74
   4  -4  -4    1.81    1.15
   4  -4  -4    2.28    1.45
   4  -4  -4    4.12    2.84
  -4   4   4    0.53    2.76
   4  -4  -3  498.70   21.99
  -4   4   3  495.36   25.62
   4  -4  -3  502.51   25.19
  -4   4   2  149.60   10.65
  -4   4   1   11.63    3.80
   4  -4   0  220.35   10.29
   4  -4   1    6.04    1.56
  -4   4  -1    4.03    3.07
  -4   4  -2    5.07    2.82
   4  -4   2    6.30    1.56
   4  -4   2    7.16    3.10
   4  -4   2    5.58    1.62
   4  -4   3    7.95    1.69
  -4   4  -3    7.00    1.91
   4  -4   3    5.33    1.54
   4  -4   3    5.24    2.93
  -4   4  -3    7.12    3.33
  -4   4  -3    3.77    1.24
   4  -4   4  130.91    6.60
  -4   4  -4  136.27    7.02
  -4   4  -4  123.39    9.53
  -4   4  -4  122.87    6.52
   4  -4   4  131.34    9.27
   4  -4   5  268.06   11.92
   4  -4   5  271.79   15.92
  -4   4  -5  238.81   14.78
  -4   4  -5  247.31   11.83
  -4   4  -5  265.90   12.13
  -4   4  -6    2.51    1.79
   4  -4   6   -0.57    3.10
   4  -4   6    1.45    1.42
   4  -4   7   74.27    7.65
  -4   4  -7   82.43    5.13
  -4   4  -7   92.24    5.49
  -4   4  -8  209.85   11.06
  -4   4  -8  243.74   11.82
  -4   4  -8  241.43   11.25
  -4   4  -9    1.79    1.71
  -4   4  -9   -0.77    2.41
  -4   4  -9    2.61    1.80
  -4   4 -10   14.29    1.88
  -4   4 -10   17.91    2.17
  -4   4 -11    2.14    1.24
   4  -3 -12    2.38    1.09
   4  -3 -12    4.13    1.27
   4  -3 -11    9.50    1.85
   4  -3 -11    8.40    1.82
   4  -3 -10   -0.66    1.25
   4  -3 -10    1.14    1.89
   4  -3 -10    0.31    1.71
   4  -3  -9   21.74    2.20
   4  -3  -9   26.45    2.84
   4  -3  -8  244.97   11.77
   4  -3  -7   10.89    2.15
   4  -3  -6  420.36   20.22
  -4   3   6  442.89   18.25
   4  -3  -5   21.32    2.18
   4  -3  -5   18.96    3.31
  -4   3   5   26.42    2.30
  -4   3   5   24.09    4.22
  -4   3   4  176.94    8.42
  -4   3   4  156.55   10.98
  -4   3   3  528.44   26.25
  -4   3   2  337.96   18.23
  -4   3   1 1741.45   76.30
  -4   3   0 1139.89   49.21
  -4   3   0 1185.66   53.02
   4  -3   0 1216.96   49.40
  -4   3  -1   33.31    2.42
  -4   3  -1   26.73    4.36
   4  -3   1   31.88    2.38
  -4   3  -2    5.12    1.24
  -4   3  -2    4.87    2.99
   4  -3   2    6.44    1.26
  -4   3  -2    5.37    1.37
  -4   3  -3    4.13    1.30
   4  -3   3    3.50    1.28
  -4   3  -3    4.74    1.51
  -4   3  -3    1.34    2.65
  -4   3  -4  327.05   14.89
  -4   3  -4  353.62   15.22
  -4   3  -4  328.67   14.91
   4  -3   4  324.25   14.71
  -4   3  -4  352.38   18.09
  -4   3  -5   78.38    4.53
  -4   3  -5   93.10    4.98
   4  -3   5   84.94    4.54
   4  -3   5   88.12    6.82
  -4   3  -5   83.73    7.00
   4  -3   6    3.54    2.96
  -4   3  -6    2.61    1.98
  -4   3  -6    1.74    1.65
   4  -3   7    6.59    3.28
  -4   3  -7   12.47    2.41
  -4   3  -7   12.28    2.24
  -4   3  -8   80.43    5.29
  -4   3  -8   90.63    5.40
  -4   3  -8   90.25    5.85
  -4   3  -9   13.58    2.48
  -4   3  -9   14.31    2.33
  -4   3  -9   13.08    2.83
  -4   3 -10  127.09    7.05
  -4   3 -10  129.62    6.70
  -4   3 -10  139.11    7.53
  -4   3 -11    5.01    1.57
   4  -2 -12    4.64    1.13
   4  -2 -12    4.61    1.29
   4  -2 -11   57.32    3.50
   4  -2 -11   67.66    4.04
   4  -2 -10    4.18    1.95
   4  -2 -10    1.75    1.67
   4  -2 -10    3.34    1.52
   4  -2  -9   46.93    3.47
   4  -2  -9   49.42    3.46
   4  -2  -8    0.24    1.58
   4  -2  -7   24.96    2.34
  -4   2   7   20.96    2.25
   4  -2  -6  236.42   11.08
  -4   2   6  256.98   11.54
  -4   2   5  352.29   18.76
   4  -2  -5  365.89   15.81
  -4   2   4    9.18    3.10
  -4   2   4    7.83    1.51
   4  -2  -4    5.90    1.08
  -4   2   3  194.87   11.59
  -4   2   3  184.93    8.84
  -4   2   2  478.10   22.39
  -4   2   2  431.68   19.25
  -4   2   1  277.75   15.28
  -4   2   0 1678.47   73.14
  -4   2  -1    7.05    1.25
  -4   2  -2  399.85   19.93
  -4   2  -2  391.82   17.02
   4  -2   2  400.19   16.74
  -4   2  -2  370.77   16.85
  -4   2  -2  379.04   16.81
  -4   2  -3  712.35   32.02
  -4   2  -3  661.33   28.96
   4  -2   3  693.12   28.68
  -4   2  -3  659.38   28.94
  -4   2  -3  679.11   28.88
  -4   2  -4  249.51   11.65
  -4   2  -4  264.68   14.29
   4  -2   4  257.42   11.31
  -4   2  -4  265.83   11.80
  -4   2  -4  245.66   11.52
  -4   2  -5  711.01   32.64
  -4   2  -5  668.54   29.78
  -4   2  -5  746.55   30.23
  -4   2  -6   24.51    2.56
  -4   2  -6   20.50    2.50
  -4   2  -7    2.19    1.81
  -4   2  -7    3.39    2.16
  -4   2  -7    5.37    2.04
   4  -2   7    2.22    2.47
  -4   2  -7    3.14    1.80
  -4   2  -8    5.32    2.31
  -4   2  -8    5.65    2.00
  -4   2  -8   11.34    2.47
  -4   2  -8    8.83    2.28
  -4   2  -9   42.96    4.08
  -4   2  -9   52.37    3.78
  -4   2  -9   49.10    3.90
  -4   2  -9   45.47    3.95
  -4   2 -10   16.02    2.95
  -4   2 -10   11.71    2.14
  -4   2 -10   12.78    2.51
  -4   2 -10   12.77    2.43
  -4   2 -11   39.21    3.52
  -4   2 -12    2.33    1.18
  -4   2 -12    6.53    1.47
   4  -1 -12    1.16    1.24
   4  -1 -11    2.64    1.34
   4  -1 -11    3.03    1.75
   4  -1 -10    2.95    1.76
   4  -1 -10    3.83    1.87
  -4   1   9  134.87    7.36
   4  -1  -9  146.86    7.36
   4  -1  -9  143.64    7.34
  -4   1   8  220.42   10.83
   4  -1  -8  229.67   10.57
  -4   1   8  213.70   10.55
   4  -1  -7   99.59    5.44
  -4   1   7  105.04    5.74
   4  -1  -6  165.20    7.87
  -4   1   6  166.34    8.32
   4  -1  -5   15.62    1.61
  -4   1   5   15.40    3.12
  -4   1   5   15.16    1.90
  -4   1   4    2.07    1.17
   4  -1  -4    1.51    0.89
  -4   1   4    4.16    2.40
  -4   1   3 1215.58   52.83
  -4   1   3 1181.57   49.94
  -4   1   2   12.48    1.61
   4  -1  -1 1765.12   78.07
  -4   1   1 1858.33   77.97
  -4   1   1 1792.54   75.02
   4  -1   0   87.11    6.92
  -4   1   0   86.50    6.73
  -4   1   0   79.03    4.34
   4  -1   1    3.17    2.87
  -4   1  -2 1278.08   54.26
  -4   1  -2 1197.29   51.12
   4  -1   2 1205.57   54.46
  -4   1  -2 1257.24   51.28
  -4   1  -2 1207.48   51.15
  -4   1  -3   13.65    1.65
  -4   1  -3   18.20    1.77
  -4   1  -3   14.97    1.70
  -4   1  -4   84.91    6.43
  -4   1  -4   81.28    4.21
  -4   1  -4   75.67    4.41
  -4   1  -4   75.95    4.37
  -4   1  -5  134.40    8.43
  -4   1  -5  121.35    6.10
  -4   1  -5  133.99    6.55
  -4   1  -6  169.05    8.18
  -4   1  -6  172.13    8.16
  -4   1  -6  143.38    9.19
  -4   1  -6  153.27    8.16
  -4   1  -7  112.55    6.09
  -4   1  -7   93.90    6.12
   4  -1   7  115.16    7.83
  -4   1  -7  114.13    6.20
  -4   1  -8  133.93    7.13
  -4   1  -8  131.66    7.52
  -4   1  -8  128.88    7.51
  -4   1  -9   33.29    3.18
  -4   1  -9   29.93    3.45
  -4   1  -9   24.00    5.24
  -4   1  -9   35.21    3.71
  -4   1 -10   37.55    3.68
  -4   1 -10   32.98    3.01
  -4   1 -10   35.54    3.35
  -4   1 -10   27.14    3.40
  -4   1 -11    4.26    2.21
  -4   1 -11    7.31    2.00
  -4   1 -11    6.07    2.09
  -4   1 -11    5.39    1.56
  -4   1 -12   21.93    2.34
  -4   1 -12   22.29    2.23
  -4   1 -12   20.81    2.04
   4   0 -12    2.82    1.25
   4   0 -11   37.83    2.85
   4   0 -11   41.80    2.92
   4   0 -11   38.77    2.68
   4   0 -10   30.81    2.90
   4   0 -10   33.52    2.88
  -4   0   9   24.53    2.85
   4   0  -9   25.45    2.74
   4   0  -9   24.03    2.61
  -4   0   8   33.85    3.28
  -4   0   8   40.39    3.28
   4   0  -8   35.81    3.02
  -4   0   7    6.52    1.95
   4   0  -7    8.14    1.82
  -4   0   6  131.98    6.86
   4   0  -6  122.21    6.29
  -4   0   5   52.20    5.08
   4   0  -5   55.24    3.31
  -4   0   5   63.24    3.89
   4   0  -4   51.96    2.95
  -4   0   4   49.12    4.88
  -4   0   4   52.21    3.13
  -4   0   4   49.86    3.47
  -4   0   3  282.26   13.04
   4   0  -3  327.04   16.12
  -4   0   3  310.94   15.73
  -4   0   2   31.48    2.28
  -4   0   2   33.15    3.97
   4   0  -2   30.30    4.13
  -4   0   1    8.94    1.42
   4   0  -1    5.35    2.79
  -4   0   0   13.47    1.50
  -4   0   0    9.01    2.73
   4   0   1   36.73    4.44
   4   0   2  888.91   39.92
  -4   0  -2  910.67   39.58
  -4   0  -2  856.96   36.83
  -4   0  -2  871.91   36.82
  -4   0  -3  156.51    9.28
  -4   0  -3  148.56    6.90
  -4   0  -3  145.38    6.93
   4   0   3  160.30    9.74
  -4   0  -3  132.67    6.86
  -4   0  -4   31.89    2.54
  -4   0  -4   38.31    2.46
  -4   0  -4   38.27    4.09
   4   0   4   38.04    4.62
  -4   0  -4   35.97    2.59
  -4   0  -5  295.30   13.54
  -4   0  -5  314.06   15.89
  -4   0  -5  327.77   14.04
  -4   0  -6   54.06    3.84
  -4   0  -6   49.18    4.66
  -4   0  -7   81.64    5.03
  -4   0  -7   83.12    4.85
  -4   0  -7   70.59    4.89
  -4   0  -8    4.86    2.07
  -4   0  -8    5.17    2.33
  -4   0  -8    5.74    2.01
  -4   0  -8    5.54    3.74
  -4   0  -8    3.20    2.21
  -4   0  -9    2.39    2.07
  -4   0  -9    3.04    2.02
  -4   0  -9   -1.15    2.29
  -4   0  -9    1.62    2.36
  -4   0  -9    2.17    3.21
  -4   0 -10  148.73    8.63
  -4   0 -10  155.75    8.49
  -4   0 -10  153.38    8.18
  -4   0 -10  153.47    7.82
  -4   0 -10  155.53   12.29
  -4   0 -11   56.61    4.65
  -4   0 -11   64.02    4.10
  -4   0 -11   61.31    4.20
  -4   0 -12    3.51    2.00
  -4   0 -13    5.92    1.43
  -4   0 -13    2.34    1.20
   4   1 -11   74.75    4.12
   4   1 -11   69.65    4.03
   4   1 -10   47.38    3.40
   4   1  -9  135.86    7.20
  -4  -1   9  135.86    7.43
  -4  -1   9  119.47    7.08
   4   1  -9  147.34    7.13
  -4  -1   8   83.08    5.41
   4   1  -8   75.24    4.91
  -4  -1   8   73.77    5.10
   4   1  -8   87.18    4.92
  -4  -1   7   39.44    3.53
   4   1  -7   34.03    2.91
  -4  -1   7   40.15    3.43
   4   1  -6  125.61    6.21
  -4  -1   6  112.55    6.61
   4   1  -5  191.11    8.83
  -4  -1   5  192.78    9.48
   4   1  -5  173.16   10.86
   4   1  -4  726.00   31.18
  -4  -1   4  715.70   33.97
  -4  -1   4  733.70   31.80
   4   1  -4  835.87   34.71
  -4  -1   3   85.01    6.83
  -4  -1   3   97.87    5.15
   4   1  -3  105.57    7.61
   4   1  -3   89.86    4.54
  -4  -1   2   30.86    2.34
  -4  -1   2   29.96    3.99
   4   1  -2   33.77    4.44
  -4  -1   1    8.41    1.35
   4   1  -1    7.76    3.02
  -4  -1   1    6.06    2.51
  -4  -1   0   39.35    2.53
  -4  -1   0   32.38    2.12
  -4  -1   0   38.75    4.19
   4   1   1  121.49    8.52
  -4  -1  -1  120.03    5.92
  -4  -1  -2  928.83   40.37
  -4  -1  -2  972.58   40.54
  -4  -1  -2  963.60   40.51
  -4  -1  -2 1025.41   43.41
   4   1   2  990.44   43.78
  -4  -1  -3  359.43   16.04
  -4  -1  -3  365.09   16.15
  -4  -1  -3  364.97   16.03
  -4  -1  -3  402.95   18.80
   4   1   3  365.35   19.06
   4   1   4  116.61    8.26
  -4  -1  -4  110.44    5.74
  -4  -1  -4  115.56    7.73
   4   1   5   19.47    3.82
  -4  -1  -5   26.86    2.37
  -4  -1  -5   26.86    3.70
  -4  -1  -6   39.95    4.10
   4   1   6   33.97    4.54
  -4  -1  -6   48.97    3.28
  -4  -1  -6   44.17    3.22
  -4  -1  -6   36.36    3.18
  -4  -1  -7  257.02   11.73
  -4  -1  -7  238.67   11.76
  -4  -1  -7  258.66   11.82
  -4  -1  -7  233.92   11.89
  -4  -1  -7  243.93   11.68
  -4  -1  -8   41.97    3.47
  -4  -1  -8   37.95    3.29
  -4  -1  -8   40.25    3.42
  -4  -1  -8   42.11    6.45
  -4  -1  -8   39.56    3.88
  -4  -1  -8   43.11    3.78
  -4  -1  -8   43.08    3.66
  -4  -1  -9   20.48    5.29
  -4  -1  -9   30.29    3.48
  -4  -1  -9   32.70    3.12
  -4  -1  -9   28.55    2.95
  -4  -1  -9   28.24    3.01
  -4  -1  -9   31.11    3.72
  -4  -1  -9   25.80    2.86
  -4  -1 -10  188.82    9.60
  -4  -1 -10  191.39    9.53
  -4  -1 -10  192.45    9.41
  -4  -1 -10  194.19   10.44
  -4  -1 -10  184.14   14.22
  -4  -1 -11   19.95    2.26
  -4  -1 -11   22.57    3.34
  -4  -1 -12    4.45    2.27
  -4  -1 -13    2.28    1.25
  -4  -1 -13    1.42    1.49
  -4  -1 -13    2.44    1.27
  -4  -2  11   15.45    1.81
   4   2 -11   16.26    1.74
   4   2 -10   10.58    2.00
   4   2  -9  118.83    6.42
   4   2  -9  113.35    6.20
  -4  -2   9  113.18    6.56
  -4  -2   8  196.54   10.69
   4   2  -8  214.39   10.37
   4   2  -8  224.87   10.25
  -4  -2   8  202.41   10.68
  -4  -2   7    2.44    2.14
   4   2  -7    4.60    1.92
  -4  -2   7    2.98    2.09
  -4  -2   6  261.57   13.55
  -4  -2   6  272.87   13.59
   4   2  -6  303.90   13.01
   4   2  -5  195.79   12.14
   4   2  -5  228.31   10.01
  -4  -2   5  201.72   10.55
  -4  -2   4    3.10    1.65
  -4  -2   4    2.70    1.17
   4   2  -4    2.20    1.29
  -4  -2   4    2.64    2.31
   4   2  -4    3.39    2.77
  -4  -2   3 1255.79   57.17
   4   2  -3 1426.64   58.12
  -4  -2   3 1268.81   54.66
  -4  -2   2   20.85    3.66
   4   2  -2   35.31    4.66
  -4  -2   1   39.53    2.80
  -4  -2   1   39.56    4.45
  -4  -2   0   17.50    1.70
  -4  -2   0   13.43    1.95
  -4  -2   0   18.56    3.58
  -4  -2  -1    2.54    1.17
  -4  -2  -1    2.35    2.61
  -4  -2  -2  493.18   24.52
  -4  -2  -2  503.84   21.63
  -4  -2  -3  434.20   21.09
  -4  -2  -3  410.35   18.16
  -4  -2  -4    0.97    1.34
   4   2   4    1.69    2.71
  -4  -2  -4    5.29    2.55
  -4  -2  -4    3.01    1.34
   4   2   5   42.34    5.26
  -4  -2  -5   45.62    4.65
  -4  -2  -5   41.91    2.80
  -4  -2  -5   46.42    3.20
  -4  -2  -6  181.49    9.16
  -4  -2  -6  205.52    9.46
  -4  -2  -6  173.88   10.51
   4   2   6  151.23   11.08
  -4  -2  -6  184.21    9.05
  -4  -2  -6  183.09    9.20
  -4  -2  -6  179.40    8.51
  -4  -2  -6  196.16    9.08
  -4  -2  -7    3.83    1.73
  -4  -2  -7   -0.17    1.61
  -4  -2  -7    6.65    2.04
  -4  -2  -7    0.67    3.61
  -4  -2  -7    3.26    1.82
  -4  -2  -8  194.20    9.35
  -4  -2  -8  191.03    9.39
  -4  -2  -8  173.00    9.49
  -4  -2  -8  183.12   13.80
  -4  -2  -8  189.92   10.04
  -4  -2  -8  188.69    9.79
  -4  -2  -9   16.78    2.35
  -4  -2  -9    9.52    4.38
  -4  -2  -9   12.06    2.39
  -4  -2  -9   13.32    2.89
  -4  -2  -9   17.14    2.93
  -4  -2 -10  236.17   10.84
  -4  -2 -10  232.67   11.95
  -4  -2 -10  238.04   16.38
  -4  -2 -10  207.91   11.13
  -4  -2 -11   25.32    3.39
  -4  -2 -12    8.87    1.82
  -4  -2 -12   12.75    2.62
  -4  -2 -13   13.81    1.64
  -4  -2 -13   11.73    1.80
  -4  -2 -13   12.52    2.05
   4   3 -11   97.19    4.81
  -4  -3  10    3.14    1.76
  -4  -3   9   23.74    2.96
   4   3  -9   27.38    2.69
  -4  -3   8    9.00    2.56
   4   3  -8    7.63    2.07
  -4  -3   8    9.19    2.54
   4   3  -7    5.86    2.02
  -4  -3   7    4.93    2.35
  -4  -3   7    3.86    2.50
  -4  -3   6  138.27    7.98
  -4  -3   6  134.82    7.94
   4   3  -6  146.66    7.28
  -4  -3   5    5.01    2.13
  -4  -3   5    5.48    2.24
   4   3  -5    3.71    1.68
  -4  -3   4    2.30    1.18
  -4  -3   4   -0.40    2.18
  -4  -3   4    2.27    1.85
   4   3  -4    4.66    3.23
  -4  -3   3  281.15   15.08
  -4  -3   3  261.36   12.16
  -4  -3   2  167.94   10.86
  -4  -3   2  177.89    8.42
  -4  -3   2  171.19    8.59
  -4  -3   1  213.38    9.83
  -4  -3   1  197.69   11.08
  -4  -3   1  216.77   12.75
  -4  -3   1  205.34    9.84
  -4  -3   0  570.77   24.20
  -4  -3   0  569.42   25.34
  -4  -3   0  523.19   24.76
  -4  -3   0  545.61   27.16
  -4  -3   0  560.77   24.02
  -4  -3  -1   11.64    1.65
  -4  -3  -1    7.06    1.92
  -4  -3  -1   11.89    3.31
  -4  -3  -1    9.23    2.19
  -4  -3  -1    8.72    1.33
  -4  -3  -2  193.78    9.36
  -4  -3  -2  200.45   11.30
  -4  -3  -2  205.80   10.23
  -4  -3  -3   64.69    5.82
  -4  -3  -3   62.67    6.07
  -4  -3  -3   67.93    3.93
  -4  -3  -4  155.57   10.37
  -4  -3  -4  139.65    9.72
  -4  -3  -4  155.21    7.44
  -4  -3  -4  148.79    7.46
  -4  -3  -5  121.45    6.30
  -4  -3  -5  115.78    6.44
  -4  -3  -5  116.20    6.07
  -4  -3  -5  107.42    8.17
  -4  -3  -5  136.34    9.72
  -4  -3  -5  120.71    6.43
  -4  -3  -5  127.03    6.62
  -4  -3  -6   14.56    1.73
  -4  -3  -6   11.25    3.92
  -4  -3  -6   15.46    2.02
  -4  -3  -6   17.55    2.35
  -4  -3  -6   13.90    2.26
   4   3   6   10.24    3.36
  -4  -3  -6   10.93    2.85
  -4  -3  -6   13.47    2.24
  -4  -3  -7   30.11    2.71
  -4  -3  -7   24.28    2.96
  -4  -3  -7   29.42    3.04
  -4  -3  -7   30.69    3.26
  -4  -3  -8   26.20    3.06
  -4  -3  -8   29.51    3.38
  -4  -3  -8   27.29    3.21
  -4  -3  -8   21.93    5.63
  -4  -3  -8   29.08    2.71
  -4  -3  -8   26.06    3.30
  -4  -3  -9   76.84    4.97
  -4  -3  -9   87.59    5.95
  -4  -3  -9   77.91    5.51
  -4  -3  -9   72.18    8.89
  -4  -3  -9   84.62    4.78
  -4  -3  -9   75.43    5.43
  -4  -3 -10    4.96    3.98
  -4  -3 -10    8.70    1.65
  -4  -3 -10   10.10    2.31
  -4  -3 -10    8.63    2.19
  -4  -3 -11  134.24    7.42
  -4  -3 -11  141.31    7.30
  -4  -3 -12   34.20    2.71
  -4  -3 -12   41.75    2.95
  -4  -3 -12   37.59    3.57
  -4  -3 -13   10.29    1.36
  -4  -3 -13   11.58    1.92
  -4  -3 -13   10.32    1.76
   4   4 -10   33.17    2.36
  -4  -4  10   31.55    2.68
   4   4 -10   34.12    2.47
   4   4  -9    1.39    1.50
   4   4  -8    5.23    1.93
  -4  -4   8    4.24    2.13
   4   4  -8    5.83    1.85
  -4  -4   7  118.26    7.11
   4   4  -7  108.79    6.10
  -4  -4   6  174.94    8.64
  -4  -4   6  158.84    9.16
   4   4  -6  162.57    8.26
  -4  -4   6  166.86    9.20
  -4  -4   5    3.22    2.41
  -4  -4   4   15.34    2.46
  -4  -4   4   14.84    3.36
  -4  -4   4   15.09    1.89
   4   4  -4   12.57    4.01
  -4  -4   3  130.35    7.23
  -4  -4   3  129.69    6.82
  -4  -4   3  130.84    7.09
  -4  -4   3  136.94    9.54
  -4  -4   2   14.42    2.15
  -4  -4   2   14.40    2.02
  -4  -4   2    8.73    3.15
  -4  -4   2   14.53    3.49
  -4  -4   2   11.40    1.93
  -4  -4   1    7.07    1.72
  -4  -4   1    5.33    2.99
  -4  -4   1   11.93    3.02
  -4  -4   1    7.62    1.73
  -4  -4   1    8.25    1.55
  -4  -4   0   77.33    5.88
  -4  -4   0   70.67    4.22
  -4  -4   0   76.71    4.45
  -4  -4   0   66.87    4.03
  -4  -4   0   74.36    6.85
  -4  -4  -1  143.44    8.39
  -4  -4  -1  132.57    6.64
  -4  -4  -1  142.09    7.04
  -4  -4  -1  121.50    7.90
  -4  -4  -1  158.40   10.19
  -4  -4  -1  132.54    6.47
  -4  -4  -2  574.80   25.82
  -4  -4  -2  561.20   24.98
  -4  -4  -2  518.71   22.90
  -4  -4  -3  402.45   21.29
  -4  -4  -3  435.58   21.24
  -4  -4  -3  401.74   18.17
  -4  -4  -4    2.10    1.40
  -4  -4  -4    3.28    2.60
  -4  -4  -4    2.42    1.58
  -4  -4  -4    3.06    2.71
  -4  -4  -4    2.70    1.58
  -4  -4  -5  165.71    8.34
  -4  -4  -5  177.73    8.73
  -4  -4  -5  166.21   11.83
  -4  -4  -5  172.76   11.05
  -4  -4  -5  164.50    8.46
  -4  -4  -6  141.70    7.62
  -4  -4  -6  161.40    8.03
  -4  -4  -6  145.65    7.10
  -4  -4  -6  152.31    7.90
  -4  -4  -6  127.62    7.01
  -4  -4  -6  148.11   11.55
  -4  -4  -6  132.12    9.54
  -4  -4  -7    4.96    2.17
  -4  -4  -7    3.69    1.54
  -4  -4  -7    8.26    2.31
  -4  -4  -7    5.30    2.24
  -4  -4  -7    8.27    4.00
  -4  -4  -8   18.57    2.85
  -4  -4  -8   14.94    2.34
  -4  -4  -8   21.20    3.14
  -4  -4  -8   22.18    5.47
  -4  -4  -8   19.00    3.05
  -4  -4  -9    2.56    1.83
  -4  -4  -9    1.16    2.22
  -4  -4  -9    0.69    2.41
  -4  -4 -10    0.29    1.77
  -4  -4 -10   -0.23    2.35
  -4  -4 -10    1.94    2.18
  -4  -4 -11    2.46    1.75
  -4  -4 -11    2.06    2.25
  -4  -4 -11    0.91    1.84
  -4  -4 -12   -0.20    1.37
  -4  -4 -12    2.01    1.87
  -4  -4 -12   -0.25    1.30
   4   5  -9    0.77    1.20
   4   5  -9    1.30    1.24
  -4  -5   9    2.23    1.59
   4   5  -8   15.60    2.02
  -4  -5   8    9.94    2.45
   4   5  -7   27.71    2.56
  -4  -5   7   35.14    3.74
   4   5  -7   36.40    2.97
  -4  -5   6  184.29    9.43
   4   5  -6  172.99    8.82
  -4  -5   6  181.97   10.06
   4   5  -6  204.74    9.25
  -4  -5   5   57.92    5.04
  -4  -5   5   61.22    4.51
   4   5  -5   62.77    3.81
   4   5  -4    8.66    1.62
  -4  -5   4   10.34    2.45
  -4  -5   4    4.38    2.16
  -4  -5   3   22.07    2.85
  -4  -5   3   19.82    2.56
  -4  -5   3   14.09    3.78
  -4  -5   3   16.21    4.08
  -4  -5   3   14.89    2.17
  -4  -5   2    3.76    1.94
  -4  -5   2    1.66    3.16
  -4  -5   2    4.78    3.10
  -4  -5   2    4.17    1.67
  -4  -5   2    5.73    1.86
  -4  -5   1   28.83    5.09
  -4  -5   1   33.82    4.75
  -4  -5   1   29.52    2.77
  -4  -5   1   28.90    2.79
  -4  -5   1   29.28    2.69
  -4  -5   0   19.97    4.61
  -4  -5   0   24.60    4.00
  -4  -5   0   13.77    2.05
  -4  -5   0   19.78    2.40
  -4  -5   0   16.67    1.92
  -4  -5  -1    8.85    3.66
  -4  -5  -1    1.86    2.63
  -4  -5  -1    7.03    1.55
  -4  -5  -1    6.27    1.87
  -4  -5  -2  615.17   27.64
  -4  -5  -2  565.35   25.32
  -4  -5  -2  610.46   25.47
  -4  -5  -3   31.22    4.53
  -4  -5  -3   29.97    2.91
  -4  -5  -3   28.37    4.92
  -4  -5  -3   34.49    3.00
  -4  -5  -3   34.13    2.96
  -4  -5  -4   17.77    3.91
  -4  -5  -4   11.42    1.95
  -4  -5  -4   19.61    2.48
  -4  -5  -4   15.73    2.34
  -4  -5  -4   19.39    4.15
  -4  -5  -4   16.62    2.22
  -4  -5  -5  156.09    8.52
  -4  -5  -5  185.83    9.02
  -4  -5  -5  163.66    8.43
  -4  -5  -5  148.61   11.12
  -4  -5  -5  186.20   12.68
  -4  -5  -5  178.69    9.05
  -4  -5  -6   27.98    4.69
  -4  -5  -6   33.25    3.25
  -4  -5  -6   30.48    2.61
  -4  -5  -6   40.27    3.59
  -4  -5  -6   33.26    3.21
  -4  -5  -6   34.09    3.21
  -4  -5  -6   37.35    6.10
  -4  -5  -6   35.10    2.85
  -4  -5  -7   34.24    4.78
  -4  -5  -7   50.49    4.04
  -4  -5  -7   38.51    3.89
  -4  -5  -7   42.89    3.19
  -4  -5  -7   50.25    4.16
  -4  -5  -7   43.10    3.74
  -4  -5  -7   45.02    3.83
  -4  -5  -7   37.85    2.94
  -4  -5  -7   48.89    7.28
  -4  -5  -8   22.88    3.03
  -4  -5  -8   24.68    2.54
  -4  -5  -8   26.37    3.29
  -4  -5  -8   28.25    3.40
  -4  -5  -8   26.20    3.16
  -4  -5  -8   26.59    6.04
  -4  -5  -9    4.17    2.38
  -4  -5  -9    4.25    2.38
  -4  -5  -9    5.98    1.92
  -4  -5  -9    0.42    2.34
  -4  -5  -9    5.01    3.94
  -4  -5  -9    6.13    2.34
  -4  -5 -10   35.91    3.73
  -4  -5 -10   43.39    3.84
  -4  -5 -10   41.76    3.68
  -4  -5 -10   37.40    3.11
  -4  -5 -11    3.89    1.91
  -4  -5 -11    3.02    2.07
  -4  -5 -11    1.11    1.49
  -4  -5 -12    1.11    1.35
  -4  -5 -12    0.69    1.58
  -4  -5 -12    1.41    1.22
   4   6  -8    9.05    1.37
   4   6  -8    9.68    1.51
  -4  -6   7    1.75    2.09
   4   6  -7    1.30    1.54
   4   6  -6  153.88    7.53
  -4  -6   6  139.38    7.70
  -4  -6   5   53.08    4.14
  -4  -6   5   43.73    6.23
   4   6  -5   48.91    3.66
  -4  -6   4   49.46    6.73
  -4  -6   4   56.23    4.58
  -4  -6   4   52.81    4.38
  -4  -6   3   35.05    3.66
  -4  -6   3   35.98    3.06
  -4  -6   3   34.61    5.36
  -4  -6   3   40.02    5.77
  -4  -6   3   36.86    3.84
  -4  -6   2    1.85    2.17
  -4  -6   2    6.25    3.74
  -4  -6   2    0.55    3.36
  -4  -6   2    1.39    2.14
  -4  -6   2    0.17    1.76
  -4  -6   1   40.28    6.08
  -4  -6   1   55.82    6.17
  -4  -6   1   40.70    3.62
  -4  -6   1   48.49    3.76
  -4  -6   0    3.85    3.41
  -4  -6   0    3.35    3.04
  -4  -6   0    3.78    1.90
  -4  -6   0    2.38    1.72
  -4  -6  -1  366.78   18.45
  -4  -6  -1  343.59   15.67
  -4  -6  -1  330.84   15.20
  -4  -6  -2  104.05    5.79
  -4  -6  -2   92.79    5.89
  -4  -6  -2  100.46    5.90
  -4  -6  -2  110.54    8.09
  -4  -6  -3   38.32    3.23
  -4  -6  -3   34.30    3.31
  -4  -6  -3   39.35    3.41
  -4  -6  -4    6.76    3.22
  -4  -6  -4    7.53    2.03
  -4  -6  -4    9.67    2.22
  -4  -6  -4    2.50    3.67
  -4  -6  -4    6.02    1.73
  -4  -6  -4    7.82    1.89
  -4  -6  -4    7.58    2.24
  -4  -6  -5   42.49    5.85
  -4  -6  -5   36.23    3.51
  -4  -6  -5   37.26    3.61
  -4  -6  -5   34.92    3.24
  -4  -6  -5   33.82    5.77
  -4  -6  -5   33.15    3.28
  -4  -6  -6   23.97    4.67
  -4  -6  -6   33.18    3.45
  -4  -6  -6   30.80    3.18
  -4  -6  -6   27.59    2.79
  -4  -6  -6   28.21    2.76
  -4  -6  -6   31.06    5.68
  -4  -6  -6   30.08    3.26
  -4  -6  -7   73.23    5.33
  -4  -6  -7   72.80    4.47
  -4  -6  -7   82.10    5.18
  -4  -6  -7   73.94    4.91
  -4  -6  -7   77.25    5.60
  -4  -6  -7   76.55    5.28
  -4  -6  -7   72.83    8.47
  -4  -6  -8   34.84    2.82
  -4  -6  -8   33.54    6.39
  -4  -6  -8   25.31    2.98
  -4  -6  -8   27.42    3.21
  -4  -6  -8   36.52    3.72
  -4  -6  -9    0.51    1.99
  -4  -6  -9    1.08    1.92
  -4  -6  -9    1.37    2.24
  -4  -6  -9    0.98    1.60
  -4  -6  -9    1.37    2.33
  -4  -6 -10    6.60    1.69
  -4  -6 -10    8.02    2.35
  -4  -6 -10    1.51    1.86
  -4  -6 -11    8.84    2.02
  -4  -6 -11    2.86    1.81
  -4  -6 -12    7.06    1.50
  -4  -7   7    5.20    1.62
   4   7  -7    8.76    1.40
  -4  -7   6   11.87    2.20
   4   7  -6   12.38    1.84
  -4  -7   5   44.22    3.62
  -4  -7   5   42.70    3.60
   4   7  -5   44.42    3.30
  -4  -7   4    2.73    2.25
  -4  -7   4    0.53    2.01
  -4  -7   3  122.45    7.18
  -4  -7   3  137.71   10.42
  -4  -7   3  114.83    6.49
  -4  -7   3  119.49    6.82
  -4  -7   2   78.32    5.36
  -4  -7   2   73.74    4.71
  -4  -7   2   71.83    7.48
  -4  -7   2   62.39    4.47
  -4  -7   1   13.37    2.10
  -4  -7   1   21.12    2.81
  -4  -7   1   21.27    4.87
  -4  -7   1   10.46    4.16
  -4  -7   0   64.56    4.73
  -4  -7   0   68.17    4.99
  -4  -7   0   64.81    7.81
  -4  -7   0   72.73    7.37
  -4  -7  -1  210.61   12.75
  -4  -7  -1  170.70   13.33
  -4  -7  -1  197.03    9.75
  -4  -7  -1  181.41    9.75
  -4  -7  -1  183.34    9.82
  -4  -7  -2   15.62    4.92
  -4  -7  -2   12.89    3.87
  -4  -7  -2   17.44    2.59
  -4  -7  -2   18.45    2.76
  -4  -7  -2   16.87    2.63
  -4  -7  -3   38.12    3.41
  -4  -7  -3   36.69    3.37
  -4  -7  -3   43.20    3.73
  -4  -7  -3   44.94    6.50
  -4  -7  -4   87.38    5.11
  -4  -7  -4   68.48    8.30
  -4  -7  -4   87.27    5.49
  -4  -7  -4   84.91    5.68
  -4  -7  -4   87.69    5.59
  -4  -7  -4   86.16    5.19
  -4  -7  -5   45.55    3.75
  -4  -7  -5   42.49    3.68
  -4  -7  -5   40.56    3.90
  -4  -7  -5   49.68    4.17
  -4  -7  -5   33.97    5.94
  -4  -7  -5   57.02    4.09
  -4  -7  -6   -0.16    1.80
  -4  -7  -6    1.13    2.05
  -4  -7  -6    0.18    2.00
  -4  -7  -6    0.83    2.34
  -4  -7  -6    4.05    3.18
  -4  -7  -6   -0.60    2.99
  -4  -7  -6    0.52    1.98
  -4  -7  -7   55.41    3.81
  -4  -7  -7   59.39    4.47
  -4  -7  -7   57.82    4.74
  -4  -7  -7   60.68    4.34
  -4  -7  -7   61.12    4.69
  -4  -7  -8    0.66    2.12
  -4  -7  -8    4.31    2.01
  -4  -7  -8    5.57    2.41
  -4  -7  -9    1.14    1.78
  -4  -7  -9    2.40    2.09
  -4  -7 -10   16.15    2.45
  -4  -7 -11    3.60    1.50
   4   8  -6    6.10    1.20
  -4  -8   6    4.94    1.24
   4   8  -5    3.42    1.39
  -4  -8   5    2.81    1.49
   4   8  -4   12.63    1.96
  -4  -8   4   11.65    1.94
  -4  -8   3   28.86    2.77
  -4  -8   3   34.44    2.71
  -4  -8   2    6.59    1.88
  -4  -8   2    9.87    2.43
  -4  -8   1  109.20    6.38
  -4  -8   0  124.53    6.93
  -4  -8   0  123.06    9.71
  -4  -8   0  109.25   10.35
  -4  -8   0  121.37    7.06
  -4  -8   0  128.10    7.28
  -4  -8  -1    0.92    2.03
  -4  -8  -1    0.72    3.71
  -4  -8  -1    2.60    3.19
  -4  -8  -1    2.09    2.20
  -4  -8  -1    3.09    2.25
  -4  -8  -2   29.78    3.26
  -4  -8  -2   28.16    3.14
  -4  -8  -2   30.79    3.12
  -4  -8  -3   40.52    3.43
  -4  -8  -3   33.59    6.10
  -4  -8  -3   42.09    3.85
  -4  -8  -4    1.19    2.20
  -4  -8  -4    2.73    1.63
  -4  -8  -4   -0.30    1.68
  -4  -8  -4    1.65    1.56
  -4  -8  -4    2.08    3.39
  -4  -8  -4    3.82    2.01
  -4  -8  -5   28.31    3.10
  -4  -8  -5   35.46    3.18
  -4  -8  -5   29.64    2.99
  -4  -8  -5   28.12    3.00
  -4  -8  -5   32.28    3.44
  -4  -8  -6   24.84    2.64
  -4  -8  -6   22.71    2.72
  -4  -8  -6   24.97    2.87
  -4  -8  -6   20.16    2.73
  -4  -8  -6   26.97    3.17
  -4  -8  -7    3.84    1.54
  -4  -8  -7    3.45    1.91
  -4  -8  -7    3.33    2.01
  -4  -8  -7    4.79    1.87
  -4  -8  -7    3.78    2.29
  -4  -8  -8   30.08    3.08
  -4  -8  -8   29.32    2.69
  -4  -8  -8   31.32    3.14
  -4  -8  -9    0.63    1.79
  -4  -8  -9   -0.41    1.67
  -4  -8 -10    5.61    1.56
   4   9  -4    8.39    1.29
   4   9  -3   17.54    1.85
  -4  -9   2    2.56    1.26
  -4  -9   2    3.52    1.32
  -4  -9   1   13.84    2.11
  -4  -9   1   21.26    2.28
  -4  -9   0    9.69    2.06
  -4  -9   0   14.66    2.27
  -4  -9  -1    5.64    1.94
  -4  -9  -1    4.27    1.96
  -4  -9  -2   66.62    4.55
  -4  -9  -2   66.86    4.62
  -4  -9  -3   10.21    2.23
  -4  -9  -4    3.67    1.79
  -4  -9  -4    1.53    2.00
  -4  -9  -4   -0.32    1.67
  -4  -9  -5   20.96    2.65
  -4  -9  -5   19.26    2.20
  -4  -9  -5   15.31    2.27
  -4  -9  -5   11.81    1.93
  -4  -9  -6    1.21    1.44
  -4  -9  -6    0.82    1.47
  -4  -9  -6    0.47    1.94
  -4  -9  -7   11.01    2.05
  -4  -9  -8   22.89    2.31
  -4 -10   1    2.16    0.90
  -4 -10   0   30.31    2.34
  -4 -10   0   25.10    2.12
  -4 -10  -1    4.29    1.47
  -4 -10  -1    2.40    1.42
  -4 -10  -2    8.76    1.74
  -4 -10  -2    8.17    1.79
  -4 -10  -3   10.09    1.86
  -4 -10  -4   45.71    3.12
  -4 -10  -4   43.44    3.18
  -4 -10  -5   18.89    1.88
  -4 -10  -5   20.38    2.21
  -4 -10  -6   13.25    1.76
   5  -9  -6    1.08    0.65
  -5   9   5    9.54    1.50
   5  -9  -4    2.31    1.48
  -5   9   4    1.42    1.48
   5  -9  -3   66.61    4.05
  -5   9   3   62.00    4.07
  -5   9   2   41.27    3.24
   5  -9  -2   43.80    3.22
   5  -9  -1   26.82    2.57
   5  -9  -1   22.55    2.52
   5  -9   0    1.69    1.63
  -5   9   0   -0.26    1.55
  -5   9   0    2.93    1.26
   5  -9   0    2.21    1.68
  -5   9  -1    3.12    1.50
   5  -9   1    2.97    1.51
  -5   9  -1    4.50    1.38
   5  -9   1    3.53    1.74
   5  -9   2   14.79    1.77
  -5   9  -2   11.80    1.67
  -5   9  -2   15.73    1.81
  -5   9  -3   36.36    2.46
   5  -9   3   32.13    2.18
   5  -8  -8    6.12    1.27
   5  -8  -8    9.26    1.21
   5  -8  -7   69.51    3.96
   5  -8  -7   68.60    3.76
   5  -8  -6    4.29    1.48
   5  -8  -6    5.56    1.35
  -5   8   5   20.67    2.37
   5  -8  -5   18.95    2.05
   5  -8  -5   20.63    1.94
  -5   8   4    4.20    1.88
   5  -8  -4    2.71    1.25
   5  -8  -3  111.09    6.13
   5  -8  -3  101.90    5.92
   5  -8  -2    4.72    1.96
   5  -8  -1   12.67    2.36
   5  -8  -1   10.13    2.25
  -5   8   1   10.75    1.77
  -5   8   0    9.30    1.92
   5  -8   0   10.32    2.35
   5  -8   1   25.44    2.82
  -5   8  -1   25.74    2.63
  -5   8  -2    7.44    1.95
  -5   8  -2    7.27    1.89
  -5   8  -3    7.77    1.89
  -5   8  -3    7.29    1.72
   5  -8   3   10.81    1.82
  -5   8  -4   14.47    1.99
   5  -8   4    8.72    1.37
  -5   8  -5    7.73    1.61
   5  -7  -9   36.63    2.63
   5  -7  -9   33.52    2.12
   5  -7  -8   15.94    2.19
   5  -7  -8   15.38    1.60
   5  -7  -7    6.21    1.96
   5  -7  -7    5.30    1.37
   5  -7  -6   56.86    4.04
   5  -7  -6   59.65    3.51
  -5   7   6   55.88    3.78
   5  -7  -5   34.37    2.60
   5  -7  -5   32.86    2.94
   5  -7  -5   27.60    2.94
  -5   7   4   54.35    4.31
  -5   7   4   57.67    7.40
   5  -7  -4   65.38    4.26
   5  -7  -4   55.08    3.98
   5  -7  -3   73.15    5.08
   5  -7  -3   76.33    8.04
  -5   7   3   83.62    8.84
   5  -7  -3   79.84    4.91
   5  -7  -2   33.85    5.96
   5  -7  -2   42.51    3.49
  -5   7   2   29.02    6.09
  -5   7   1   41.67    6.83
   5  -7  -1   65.31    7.60
   5  -7  -1   46.52    5.78
   5  -7  -1   56.40    4.26
  -5   7   1   57.01    3.68
  -5   7   0   62.47    7.91
   5  -7   0   74.30    8.31
   5  -7   0   73.98    7.40
   5  -7   0   76.46    5.19
  -5   7   0   80.99    4.76
  -5   7  -1    9.33    4.07
   5  -7   1    6.16    3.56
   5  -7   1   13.21    2.55
   5  -7   1   15.87    4.25
  -5   7  -1   13.47    2.30
  -5   7  -2  118.16    6.34
   5  -7   2  111.76    6.29
   5  -7   2  109.11    6.38
   5  -7   3   56.46    3.97
  -5   7  -3   54.42    4.02
  -5   7  -3   61.75    4.23
   5  -7   3   58.87    3.97
   5  -7   4   75.08    4.28
  -5   7  -4   75.67    4.59
  -5   7  -5  155.89    7.96
  -5   7  -7    4.36    1.39
  -5   7  -7    5.87    1.70
   5  -6 -10   11.97    1.26
   5  -6 -10   11.58    1.52
   5  -6  -9   14.77    2.18
   5  -6  -9   13.67    1.58
   5  -6  -9   18.23    2.08
   5  -6  -8   31.72    3.08
   5  -6  -8   33.45    2.51
   5  -6  -8   35.47    2.97
   5  -6  -7   14.32    2.51
   5  -6  -7   14.13    1.94
   5  -6  -7   16.07    2.29
   5  -6  -6   31.65    2.57
  -5   6   6   28.51    2.80
   5  -6  -6   27.97    2.59
   5  -6  -5  102.70    5.71
   5  -6  -5  102.76    5.77
   5  -6  -5   93.17    5.25
  -5   6   5  104.36    5.96
  -5   6   5   91.68    9.13
   5  -6  -5   97.48    8.73
   5  -6  -4   14.26    2.41
   5  -6  -4   12.38    2.06
  -5   6   4   15.14    2.56
  -5   6   4   14.98    4.79
   5  -6  -4   10.00    4.04
   5  -6  -4   14.43    1.81
  -5   6   3    5.87    4.14
   5  -6  -3    8.63    1.99
   5  -6  -3   11.21    1.83
   5  -6  -3   11.22    2.35
   5  -6  -3    7.26    3.98
   5  -6  -2  199.32   10.28
   5  -6  -2  204.17   14.29
  -5   6   2  203.08   14.62
   5  -6  -1  128.73    7.06
  -5   6   1  116.88    6.20
   5  -6  -1  130.64   10.71
  -5   6   0   20.47    2.34
   5  -6   0   15.94    4.69
   5  -6   0   17.06    2.79
  -5   6  -1   16.59    4.78
  -5   6  -1   14.79    2.33
   5  -6   1   23.00    2.69
   5  -6   1   16.45    4.51
   5  -6   1   20.39    2.85
   5  -6   1   17.19    4.82
   5  -6   2    1.34    3.17
  -5   6  -2    7.96    2.20
  -5   6  -2    7.74    3.91
   5  -6   2    5.53    3.27
   5  -6   2    6.80    2.12
   5  -6   2    6.29    2.03
  -5   6  -3   30.88    3.20
  -5   6  -3   30.87    3.19
   5  -6   3   36.59    3.20
   5  -6   3   26.57    5.18
  -5   6  -3   30.79    5.70
   5  -6   3   35.64    3.23
   5  -6   4   69.81    4.33
  -5   6  -4   59.06    4.18
  -5   6  -4   48.77    6.63
   5  -6   4   65.82    4.27
  -5   6  -4   74.24    4.74
   5  -6   4   58.16    7.27
   5  -6   5   50.24    3.47
  -5   6  -5   53.46    4.07
  -5   6  -6  159.68    8.29
  -5   6  -8   27.00    2.68
  -5   6  -8   27.80    2.42
   5  -5 -10   28.17    2.10
   5  -5 -10   24.54    2.43
   5  -5 -10   29.04    2.38
   5  -5  -9   -0.13    1.62
   5  -5  -9    0.89    1.33
   5  -5  -8   67.33    4.41
   5  -5  -8   63.87    3.98
   5  -5  -7    4.45    2.04
   5  -5  -7    4.62    1.64
   5  -5  -6   13.20    1.99
  -5   5   6   17.66    2.29
   5  -5  -6   15.59    2.05
   5  -5  -6   20.63    2.55
  -5   5   5  313.73   14.13
   5  -5  -5  318.07   17.68
   5  -5  -5  284.20   13.42
   5  -5  -5  294.75   13.87
   5  -5  -5  308.02   13.93
  -5   5   5  281.08   18.06
   5  -5  -4    9.92    1.87
   5  -5  -4    7.32    1.99
  -5   5   4   12.50    2.44
  -5   5   4    4.78    3.59
   5  -5  -4    8.27    3.52
   5  -5  -3   14.59    1.93
   5  -5  -3   17.17    2.48
  -5   5   3   13.17    4.48
   5  -5  -3    9.24    3.95
   5  -5  -2   71.34    4.81
  -5   5   2   68.57    7.88
   5  -5  -2   68.57    7.49
  -5   5   1   25.59    2.36
  -5   5   1   27.50    5.50
   5  -5   0  272.07   12.99
   5  -5   0  263.48   16.68
  -5   5   0  265.68   12.36
  -5   5  -1   61.88    7.54
  -5   5  -1   62.63    4.10
   5  -5   1   61.14    4.40
   5  -5   1   58.23    4.08
   5  -5   1   65.84    7.24
  -5   5  -2    1.94    1.97
  -5   5  -2   -0.67    3.79
   5  -5   2    1.84    1.70
   5  -5   2    3.55    1.95
   5  -5   2    1.27    3.26
   5  -5   3   40.66    5.91
  -5   5  -3   47.38    3.78
  -5   5  -3   48.16    3.76
   5  -5   3   49.91    3.55
   5  -5   3   45.56    3.63
  -5   5  -3   43.37    6.32
  -5   5  -4    5.58    3.40
   5  -5   4    7.61    3.98
   5  -5   4    4.91    1.85
   5  -5   4    2.64    1.74
  -5   5  -4    4.34    1.86
   5  -5   4    1.16    2.98
  -5   5  -4    4.70    2.26
   5  -5   5   69.33    4.07
  -5   5  -5   66.79    4.65
   5  -5   5   58.62    7.22
  -5   5  -5   59.17    3.92
  -5   5  -5   58.32    3.89
   5  -5   6  104.37    9.28
   5  -5   6   93.19    5.23
  -5   5  -6  113.07    6.28
  -5   5  -6   99.12    5.52
  -5   5  -7  116.46    6.19
  -5   5  -8  121.04    6.18
  -5   5  -8  118.53    6.46
  -5   5  -9    4.06    1.76
  -5   5  -9    1.67    1.37
   5  -4 -11    1.60    1.14
   5  -4 -11    1.71    1.00
   5  -4 -10    9.66    1.89
   5  -4 -10    8.66    1.83
   5  -4 -10   10.47    1.65
   5  -4  -9    7.90    2.09
   5  -4  -9    7.05    1.72
   5  -4  -8   24.34    2.01
   5  -4  -8   23.25    2.41
   5  -4  -7    3.90    1.65
   5  -4  -6    3.38    1.53
   5  -4  -6    4.49    1.49
  -5   4   6    2.71    1.63
  -5   4   5  192.99    9.11
   5  -4  -5  186.57   12.01
   5  -4  -5  166.97    8.48
  -5   4   5  173.46   12.58
   5  -4  -5  183.21    8.95
   5  -4  -4   91.66    5.24
  -5   4   4   82.12    8.30
   5  -4  -4   75.66    7.53
  -5   4   4   82.86    5.18
   5  -4  -3   83.46    5.22
  -5   4   3   93.80    8.57
   5  -4  -3   78.13    7.60
  -5   4   3   91.50    5.38
  -5   4   2  133.61   10.67
   5  -4  -2  129.88    7.14
  -5   4   1   44.40    6.39
  -5   4   0  380.88   22.30
  -5   4   0  408.45   17.93
   5  -4   0  410.88   18.57
   5  -4   1   12.60    2.23
  -5   4  -1   12.43    4.25
  -5   4  -1   11.67    1.94
  -5   4  -2   50.00    3.86
  -5   4  -2   55.77    3.74
   5  -4   2   50.75    3.83
  -5   4  -2   59.47    6.93
   5  -4   2   52.31    3.58
   5  -4   3  231.96   14.49
  -5   4  -3  224.13   10.88
  -5   4  -3  245.44   15.04
   5  -4   3  226.78   10.97
  -5   4  -3  214.46   10.84
   5  -4   3  225.56   10.60
  -5   4  -4    0.64    1.93
  -5   4  -4    4.73    3.09
   5  -4   4    1.10    2.60
   5  -4   4    3.55    1.70
  -5   4  -4    4.16    1.84
  -5   4  -4    4.19    1.59
   5  -4   4    2.54    1.56
  -5   4  -5   48.45    3.41
  -5   4  -5   40.66    3.17
   5  -4   5   42.72    3.10
  -5   4  -5   47.68    3.91
   5  -4   6   48.39    6.48
  -5   4  -6   50.44    3.79
  -5   4  -6   58.93    4.31
   5  -4   7  161.01   11.68
  -5   4  -7  170.93    8.60
  -5   4  -8  150.41    7.39
  -5   4  -8  137.96    7.59
  -5   4  -9   48.90    3.47
  -5   4  -9   48.67    3.78
  -5   4  -9   45.39    3.36
  -5   4 -10    5.19    1.37
  -5   4 -10    5.10    1.80
   5  -3 -11   16.53    1.68
   5  -3 -10    9.52    1.92
   5  -3 -10   12.71    1.81
   5  -3  -9   16.10    2.23
   5  -3  -9   12.32    1.78
   5  -3  -8   66.55    4.20
   5  -3  -7   11.33    1.97
   5  -3  -6    7.15    1.57
  -5   3   6    6.86    1.87
  -5   3   5   31.96    5.14
  -5   3   5   30.66    2.79
   5  -3  -5   33.18    4.64
   5  -3  -5   28.69    2.63
   5  -3  -4    2.83    1.56
  -5   3   4    4.03    3.28
  -5   3   4    2.63    1.75
   5  -3  -3   74.13    4.57
  -5   3   3   72.57    7.32
  -5   3   3   70.69    4.56
   5  -3  -2   26.76    2.66
  -5   3   2   28.17    5.04
  -5   3   2   31.06    2.90
  -5   3   1  675.33   33.09
  -5   3   1  661.73   28.93
   5  -3   0 1058.81   45.35
  -5   3   0 1025.86   44.64
  -5   3   0 1094.47   45.32
  -5   3   0 1172.68   50.01
  -5   3  -1   52.39    3.48
  -5   3  -1   57.82    3.55
   5  -3   1   59.39    4.02
  -5   3  -1   60.30    4.00
   5  -3   2    3.98    1.72
  -5   3  -2    2.55    1.54
  -5   3  -2    3.96    3.47
  -5   3  -2    2.17    1.72
   5  -3   3   60.41    4.11
  -5   3  -3   59.06    4.08
  -5   3  -3   66.46    7.05
  -5   3  -3   62.80    4.04
   5  -3   4   17.82    2.25
  -5   3  -4   21.05    2.24
  -5   3  -4   18.01    2.20
  -5   3  -4   21.73    2.53
   5  -3   4   19.91    2.06
  -5   3  -5    6.52    3.05
  -5   3  -5    9.64    2.34
  -5   3  -5    5.20    1.53
  -5   3  -5    5.36    1.82
   5  -3   5    8.63    2.85
  -5   3  -6   11.88    2.54
  -5   3  -6   12.96    2.29
  -5   3  -7    4.63    2.34
  -5   3  -7    7.65    2.14
   5  -3   7    4.28    3.25
  -5   3  -8  123.75    7.33
  -5   3  -8  122.07    7.03
  -5   3  -8  145.15    7.35
  -5   3  -9   80.70    5.25
  -5   3  -9   74.97    4.89
  -5   3  -9   81.12    4.88
  -5   3 -10    3.12    1.87
  -5   3 -10    3.39    1.69
  -5   3 -10    3.31    1.54
  -5   3 -11   16.97    1.92
  -5   3 -11   20.64    2.18
   5  -2 -11   13.97    1.68
   5  -2 -11   15.44    1.78
   5  -2 -10   81.38    4.53
   5  -2 -10   74.09    4.26
   5  -2 -10   78.47    4.59
  -5   2   9   34.84    2.88
   5  -2  -9   41.12    2.98
   5  -2  -9   37.99    3.10
   5  -2  -8  167.28    8.14
   5  -2  -8  171.98    8.49
   5  -2  -7    8.26    1.86
   5  -2  -7    9.47    1.70
   5  -2  -6  148.76    7.70
   5  -2  -6  157.41    7.45
  -5   2   6  166.38    8.24
  -5   2   5   28.50    2.54
  -5   2   5   35.02    3.02
   5  -2  -5   31.43    2.65
   5  -2  -4    6.57    1.62
  -5   2   4    6.18    1.65
  -5   2   4    9.87    3.54
  -5   2   3  361.28   16.14
   5  -2  -3  351.06   16.23
  -5   2   2  489.34   21.72
  -5   2   2  508.06   25.51
  -5   2   1  119.23    6.27
  -5   2   1  106.23    8.87
  -5   2   0  354.34   19.03
  -5   2   0  331.87   14.87
  -5   2   0  327.48   14.77
  -5   2   0  361.13   15.40
  -5   2  -1   13.95    1.73
  -5   2  -1   16.32    1.78
  -5   2  -2  125.74    6.59
  -5   2  -2  132.18    9.72
  -5   2  -2  122.38    6.33
  -5   2  -3  252.70   12.00
  -5   2  -3  264.87   12.11
   5  -2   4  120.80    6.52
  -5   2  -4  128.63    6.46
  -5   2  -4  121.20    6.43
  -5   2  -4  118.61    6.54
  -5   2  -4  123.72    9.25
  -5   2  -5  261.08   12.34
  -5   2  -5  272.38   12.70
  -5   2  -5  279.54   12.84
  -5   2  -5  272.24   15.54
  -5   2  -6    7.14    2.28
  -5   2  -6    8.00    2.25
  -5   2  -6    4.58    1.98
   5  -2   7    2.46    2.62
  -5   2  -7    2.51    1.99
  -5   2  -7    2.97    1.97
  -5   2  -7    2.60    2.08
  -5   2  -8  238.37   11.90
  -5   2  -8  240.64   12.08
  -5   2  -8  270.62   12.02
  -5   2  -8  226.35   11.99
  -5   2  -9   11.66    2.39
  -5   2  -9    6.32    2.44
  -5   2  -9   12.25    2.37
  -5   2  -9    7.75    2.20
  -5   2 -10    0.60    1.81
  -5   2 -10    5.92    2.19
  -5   2 -10    0.15    1.71
  -5   2 -10    2.58    1.64
  -5   2 -11   13.66    1.92
  -5   2 -11   15.53    2.14
  -5   2 -11    9.64    1.58
   5  -1 -11   11.87    1.58
   5  -1 -11    8.94    1.39
   5  -1 -10   47.23    3.20
   5  -1 -10   49.07    3.39
  -5   1   9   15.35    2.25
   5  -1  -9   16.76    2.20
   5  -1  -9   16.45    2.11
  -5   1   8  251.22   12.13
  -5   1   8  244.22   11.84
   5  -1  -8  250.66   11.52
  -5   1   7   14.36    2.38
   5  -1  -7   13.72    1.97
  -5   1   6   10.18    2.07
   5  -1  -6    8.53    1.63
  -5   1   5    7.28    2.90
  -5   1   5    9.26    2.12
   5  -1  -5    6.75    1.36
  -5   1   4  128.38    9.49
   5  -1  -4  132.29    6.78
  -5   1   4  141.89    6.80
   5  -1  -4  124.45    6.07
  -5   1   3  135.99    7.05
  -5   1   3  152.32   10.20
  -5   1   2  363.22   16.50
  -5   1   2  386.55   19.99
  -5   1   1   19.59    2.14
  -5   1   1   21.71    4.26
  -5   1   0 1223.63   50.12
  -5   1   0 1186.94   53.68
  -5   1   0 1156.83   49.75
  -5   1  -1  103.09    5.28
  -5   1  -1  107.16    5.48
  -5   1  -2  152.44    7.10
  -5   1  -2  131.14    6.77
  -5   1  -2  154.33   10.19
  -5   1  -2  131.41    6.91
  -5   1  -3   13.52    1.89
  -5   1  -3   13.71    1.89
  -5   1  -3   13.85    3.68
  -5   1  -4  290.61   13.11
  -5   1  -4  283.38   13.21
  -5   1  -4  286.24   16.20
  -5   1  -5  795.76   34.66
  -5   1  -5  749.12   31.06
  -5   1  -5  731.63   31.36
  -5   1  -5  770.60   31.39
  -5   1  -6    4.05    1.78
  -5   1  -6    8.05    2.27
  -5   1  -6    4.50    1.99
  -5   1  -7    1.92    2.01
  -5   1  -7    1.01    2.05
  -5   1  -8   85.44    5.24
  -5   1  -8   75.80    5.19
  -5   1  -8   77.06    5.24
  -5   1  -8   76.77    5.47
  -5   1  -9   12.15    2.63
  -5   1  -9    8.77    2.43
  -5   1  -9   10.66    4.23
  -5   1  -9   12.32    2.48
  -5   1 -10    4.88    2.04
  -5   1 -10    3.58    1.78
  -5   1 -10    1.38    2.12
  -5   1 -10    0.58    2.09
  -5   1 -11    9.98    1.75
  -5   1 -11   16.37    2.10
  -5   1 -11   11.53    2.13
  -5   1 -12    1.31    1.05
  -5   1 -12    0.92    1.14
   5   0 -11   18.67    1.77
   5   0 -11   17.03    1.77
   5   0 -10   62.65    3.73
   5   0 -10   61.05    3.82
  -5   0   9   23.74    2.55
   5   0  -9   26.00    2.51
   5   0  -9   25.06    2.64
  -5   0   9   23.03    2.71
  -5   0   8   45.51    3.67
   5   0  -8   45.88    3.33
  -5   0   8   45.11    3.80
   5   0  -7   10.93    1.93
  -5   0   7   10.25    2.28
   5   0  -6   93.27    5.13
  -5   0   6  100.52    5.95
   5   0  -5  335.80   15.13
  -5   0   5  360.12   16.07
   5   0  -4    2.05    1.10
   5   0  -4    1.65    1.34
  -5   0   4    2.60    1.79
  -5   0   4    2.69    1.32
   5   0  -3  103.95    8.34
  -5   0   3  105.34    8.05
  -5   0   3   97.47    5.20
   5   0  -3   89.50    4.53
  -5   0   2    7.63    3.17
   5   0  -2    7.23    3.68
  -5   0   2    8.52    1.63
  -5   0   1   51.19    5.62
   5   0  -1   44.53    5.58
  -5   0   1   43.22    3.09
  -5   0   0  884.82   40.20
  -5   0   0  850.20   36.54
  -5   0  -1  207.31    9.67
   5   0   1  235.64   13.79
  -5   0  -1  214.33    9.90
  -5   0  -2   14.79    1.75
  -5   0  -2   17.69    1.99
  -5   0  -2   21.86    4.09
   5   0   2   20.04    4.32
  -5   0  -2   13.01    1.84
  -5   0  -3  361.83   16.27
  -5   0  -3  357.52   16.10
  -5   0  -3  368.73   19.49
   5   0   3  382.30   20.20
  -5   0  -3  362.03   16.18
  -5   0  -4   86.44    5.15
  -5   0  -4   91.56    5.03
  -5   0  -4   89.76    7.30
   5   0   4   76.94    7.69
  -5   0  -4   88.18    4.85
  -5   0  -5   69.21    4.03
  -5   0  -5   67.61    4.35
  -5   0  -5   69.61    4.33
  -5   0  -6  197.04    9.44
  -5   0  -6  174.10    9.10
  -5   0  -6  182.84   11.41
  -5   0  -6  209.84    9.50
  -5   0  -6  176.82    9.28
  -5   0  -7    4.93    1.99
  -5   0  -7    1.98    1.97
  -5   0  -7    5.26    1.70
  -5   0  -8   17.23    2.70
  -5   0  -8   19.05    3.09
  -5   0  -8   18.83    4.89
  -5   0  -8   22.93    2.89
  -5   0  -9   51.36    4.56
  -5   0  -9   55.41    4.28
  -5   0  -9   56.85    4.12
  -5   0  -9   53.84    7.16
  -5   0  -9   51.81    4.17
  -5   0  -9   54.88    4.28
  -5   0 -10   36.93    3.13
  -5   0 -10   32.04    3.31
  -5   0 -10   34.82    3.55
  -5   0 -10   30.45    3.11
  -5   0 -11    9.36    2.23
  -5   0 -11   10.88    1.93
  -5   0 -12   -0.93    1.52
   5   1 -11    2.43    0.98
   5   1 -11    2.65    1.13
   5   1 -11    3.02    1.08
   5   1 -10   61.38    3.68
   5   1  -9    4.94    1.78
  -5  -1   9    2.54    1.95
   5   1  -9    5.79    1.98
  -5  -1   9    1.22    1.68
   5   1  -8  272.86   11.96
  -5  -1   8  245.47   12.57
   5   1  -8  261.77   12.14
  -5  -1   8  236.55   12.33
   5   1  -7   29.26    2.68
  -5  -1   7   26.05    3.32
  -5  -1   7   26.31    3.17
   5   1  -6   17.27    2.23
  -5  -1   6   20.07    2.84
   5   1  -5  387.39   16.52
  -5  -1   5  350.19   17.21
  -5  -1   4   34.25    3.20
   5   1  -4   29.61    2.32
   5   1  -4   31.90    5.03
  -5  -1   4   27.00    4.41
  -5  -1   3   84.58    7.40
   5   1  -3   91.16    7.72
   5   1  -3   78.55    4.19
  -5  -1   3   84.08    5.08
  -5  -1   2   91.84    5.07
   5   1  -2   91.08    8.03
   5   1  -2   86.87    4.36
  -5  -1   2   91.78    7.77
  -5  -1   1    1.85    1.29
  -5  -1   1    6.63    3.13
   5   1  -1    0.52    2.99
  -5  -1   0   13.78    1.82
  -5  -1   0    4.22    3.16
  -5  -1  -1   46.03    5.57
   5   1   1   50.90    6.16
  -5  -1  -1   41.75    2.93
  -5  -1  -1   40.07    2.73
  -5  -1  -2    2.40    1.38
  -5  -1  -2    2.31    2.68
   5   1   2    5.69    3.42
  -5  -1  -2    5.00    1.48
  -5  -1  -2    2.44    1.33
  -5  -1  -3  587.48   25.61
  -5  -1  -3  589.36   25.55
   5   1   3  605.04   29.82
  -5  -1  -3  592.91   25.68
   5   1   4   43.55    5.90
  -5  -1  -4   32.78    4.87
  -5  -1  -4   38.71    3.08
  -5  -1  -4   38.37    3.00
  -5  -1  -5   52.73    3.59
  -5  -1  -5   45.13    5.33
  -5  -1  -5   49.47    3.63
   5   1   5   51.60    6.16
  -5  -1  -6  319.27   14.97
  -5  -1  -6  335.60   15.09
   5   1   6  281.62   17.58
  -5  -1  -6  319.30   17.19
  -5  -1  -6  335.20   15.12
  -5  -1  -7   44.84    3.71
  -5  -1  -7   43.44    3.65
  -5  -1  -7   35.42    3.35
  -5  -1  -7   40.72    3.31
  -5  -1  -8  376.14   16.32
  -5  -1  -8  339.20   16.39
  -5  -1  -8  338.64   21.17
  -5  -1  -8  350.99   16.12
  -5  -1  -8  308.88   15.95
  -5  -1  -8  370.16   16.22
  -5  -1  -9   23.69    3.42
  -5  -1  -9   23.86    2.86
  -5  -1  -9   20.21    4.91
  -5  -1  -9   22.02    2.85
  -5  -1 -10    5.04    1.93
  -5  -1 -10    4.05    2.40
  -5  -1 -11   14.51    2.01
  -5  -1 -11   17.39    2.85
  -5  -1 -12    2.90    1.74
  -5  -1 -12    1.86    1.28
   5   2 -10    1.10    1.27
   5   2 -10    2.91    1.32
   5   2  -9   55.75    3.62
  -5  -2   9   54.13    3.98
   5   2  -9   59.72    3.85
   5   2  -8    4.65    1.79
  -5  -2   8    4.58    2.20
   5   2  -8    6.17    2.06
  -5  -2   8    4.77    2.24
   5   2  -7    2.27    1.77
  -5  -2   7    7.88    2.48
  -5  -2   7    3.60    2.36
   5   2  -6   94.22    5.15
  -5  -2   6   85.83    5.88
  -5  -2   6   86.04    5.80
  -5  -2   5  228.04   12.03
   5   2  -5  251.75   11.29
   5   2  -4  225.56   10.01
  -5  -2   4  211.47   10.20
  -5  -2   4  198.15   10.65
  -5  -2   4  215.60   13.19
   5   2  -4  232.61   13.96
   5   2  -3  105.96    8.68
  -5  -2   3   93.34    8.21
  -5  -2   2  298.03   15.18
   5   2  -2  345.12   18.66
  -5  -2   2  318.50   14.66
  -5  -2   2  336.23   18.14
  -5  -2   1   23.89    4.46
  -5  -2   1   24.19    2.39
   5   2  -1   23.41    4.98
  -5  -2   0  117.20    6.22
  -5  -2   0  126.45    9.26
  -5  -2  -1   63.48    6.37
  -5  -2  -1   57.06    3.61
   5   2   1   64.29    6.73
   5   2   2  591.56   29.86
  -5  -2  -3   21.33    2.19
  -5  -2  -3   14.54    3.79
   5   2   3   16.63    4.28
  -5  -2  -4    5.93    1.66
   5   2   4    7.68    3.93
  -5  -2  -4    4.26    1.79
  -5  -2  -4    5.39    3.01
  -5  -2  -5   43.38    3.36
  -5  -2  -5   40.15    4.99
  -5  -2  -5   44.70    3.34
  -5  -2  -5   40.92    3.36
   5   2   5   34.82    5.43
  -5  -2  -5   43.39    3.35
  -5  -2  -5   44.21    3.11
  -5  -2  -6   12.81    4.20
  -5  -2  -6    9.64    1.98
  -5  -2  -6    5.59    2.48
  -5  -2  -6   10.29    1.59
  -5  -2  -6    8.67    2.31
   5   2   6    6.88    3.48
  -5  -2  -6    6.36    2.06
  -5  -2  -6   10.32    2.19
  -5  -2  -7  224.20   10.76
  -5  -2  -7  217.18   10.94
  -5  -2  -7  209.58   10.87
  -5  -2  -8   83.41    5.32
  -5  -2  -8   91.69    5.98
  -5  -2  -8   83.17    5.59
  -5  -2  -8   77.48    5.33
  -5  -2  -8   86.55    5.28
  -5  -2  -8   74.79    8.80
  -5  -2  -9   52.85    3.93
  -5  -2  -9   47.98    7.22
  -5  -2  -9   52.99    4.62
  -5  -2  -9   62.85    4.74
  -5  -2 -10   12.48    2.17
  -5  -2 -10   14.20    2.16
  -5  -2 -10   11.26    2.12
  -5  -2 -11  107.05    5.86
  -5  -2 -11  119.90    6.85
  -5  -2 -12   20.48    2.59
  -5  -3  10   29.08    2.57
   5   3 -10   37.31    2.35
   5   3  -9    4.37    1.53
  -5  -3   9    1.62    1.66
   5   3  -9    2.09    1.52
  -5  -3   8   79.55    5.28
   5   3  -8   83.65    4.63
   5   3  -8   74.32    4.66
  -5  -3   8   70.12    5.15
  -5  -3   7    2.36    2.31
   5   3  -7    5.58    2.00
   5   3  -7    5.95    1.94
  -5  -3   7    5.32    2.41
  -5  -3   6    9.72    2.73
   5   3  -6    7.03    2.00
  -5  -3   6    9.95    2.54
  -5  -3   5   30.11    3.43
   5   3  -5   28.97    2.70
   5   3  -4   25.48    4.78
   5   3  -4   32.35    2.61
  -5  -3   4   25.85    3.16
  -5  -3   4   22.55    2.97
  -5  -3   4   26.44    2.48
  -5  -3   3  267.02   12.44
  -5  -3   3  228.36   15.13
  -5  -3   2    3.65    1.88
  -5  -3   2    7.80    1.78
   5   3  -2    2.37    3.34
  -5  -3   2    1.51    2.08
  -5  -3   2    3.26    3.14
  -5  -3   1   19.02    2.23
  -5  -3   1   15.15    2.54
  -5  -3   1   14.21    3.60
  -5  -3   1   17.90    2.15
   5   3  -1   12.33    4.30
  -5  -3   0  146.28    7.37
  -5  -3   0  145.86   10.52
  -5  -3   0  141.15    7.45
  -5  -3  -1  190.92    9.44
  -5  -3  -1  195.65   11.28
  -5  -3  -1  219.60   13.37
  -5  -3  -1  208.90    9.81
  -5  -3  -2   91.01    7.00
  -5  -3  -2   80.88    4.49
  -5  -3  -3  461.54   20.78
  -5  -3  -3  483.78   24.02
  -5  -3  -3  473.26   24.39
  -5  -3  -4    1.42    1.43
  -5  -3  -4    1.04    2.45
  -5  -3  -4    5.44    3.06
   5   3   4    1.15    3.28
  -5  -3  -4    3.21    1.51
  -5  -3  -5   16.03    4.22
  -5  -3  -5   11.56    2.15
  -5  -3  -5    9.94    1.98
  -5  -3  -5   12.93    3.47
   5   3   5   16.22    4.38
  -5  -3  -5   10.99    2.22
  -5  -3  -5   12.45    1.87
  -5  -3  -6   64.40    4.39
  -5  -3  -6   62.23    4.35
  -5  -3  -6   53.24    3.65
   5   3   6   42.14    6.27
  -5  -3  -6   68.32    4.24
  -5  -3  -6   52.07    5.78
  -5  -3  -6   58.70    7.20
  -5  -3  -6   57.10    4.42
  -5  -3  -7   23.21    2.96
  -5  -3  -7   15.56    2.05
  -5  -3  -7   23.48    2.99
  -5  -3  -7   22.68    2.85
  -5  -3  -7   26.55    5.89
  -5  -3  -7   23.60    2.65
  -5  -3  -8  135.32    7.65
  -5  -3  -8  136.73    7.42
  -5  -3  -8  122.77    6.74
  -5  -3  -8  110.50    6.34
  -5  -3  -8  122.60    7.24
  -5  -3  -9   42.09    4.01
  -5  -3  -9   39.11    3.15
  -5  -3  -9   42.05    3.30
  -5  -3 -10   69.73    4.93
  -5  -3 -10   74.86    4.44
  -5  -3 -11   23.72    2.59
  -5  -3 -11   32.02    2.49
  -5  -3 -12    2.28    1.77
   5   4  -9    4.88    1.32
  -5  -4   8  110.89    6.29
   5   4  -8  119.42    5.62
  -5  -4   7   76.49    5.39
   5   4  -7   86.26    4.76
   5   4  -7   71.25    4.52
  -5  -4   6   42.86    3.48
   5   4  -6   46.07    3.30
   5   4  -6   47.14    3.45
  -5  -4   5   78.68    5.45
   5   4  -5   81.13    4.78
  -5  -4   5   68.32    5.45
   5   4  -4    4.73    3.50
  -5  -4   4    7.47    3.15
  -5  -4   4    3.63    2.30
  -5  -4   4    5.17    1.62
   5   4  -3    3.82    3.38
  -5  -4   3    4.40    2.25
  -5  -4   3    5.05    3.02
  -5  -4   3    2.98    2.92
  -5  -4   3    0.37    2.02
  -5  -4   3    2.70    1.67
  -5  -4   2    8.56    2.09
  -5  -4   2    6.96    3.09
  -5  -4   2    3.42    2.56
  -5  -4   2    2.67    1.71
  -5  -4   2    4.06    1.69
  -5  -4   1    3.44    1.83
  -5  -4   1    6.44    3.55
  -5  -4   1    8.24    2.61
  -5  -4   1    3.24    1.60
  -5  -4   1    4.88    1.81
  -5  -4   0    9.66    1.81
  -5  -4   0    4.10    3.23
  -5  -4   0    9.83    2.50
  -5  -4   0    8.57    1.69
  -5  -4   0    7.27    1.94
  -5  -4  -1   36.12    2.77
  -5  -4  -1   35.31    3.70
  -5  -4  -1   39.83    5.65
  -5  -4  -1   36.00    3.15
  -5  -4  -1   30.49    2.44
  -5  -4  -2  313.39   16.08
  -5  -4  -2  289.30   13.24
  -5  -4  -3  348.91   15.71
  -5  -4  -3  344.55   19.43
  -5  -4  -3  351.46   18.64
  -5  -4  -3  329.68   15.42
  -5  -4  -4   20.74    4.33
  -5  -4  -4   21.99    2.50
  -5  -4  -4   19.60    4.20
  -5  -4  -4   22.19    2.47
  -5  -4  -5    4.84    1.72
  -5  -4  -5    4.34    3.06
  -5  -4  -5    6.46    2.13
  -5  -4  -5    5.86    1.95
  -5  -4  -5    0.64    3.20
   5   4   5    3.74    3.65
  -5  -4  -6    2.15    1.56
  -5  -4  -6    0.38    1.91
  -5  -4  -6   -1.01    2.82
  -5  -4  -6    0.72    3.69
  -5  -4  -6    3.13    2.07
  -5  -4  -6    2.29    2.08
   5   4   6    2.43    3.51
  -5  -4  -7   11.46    2.61
  -5  -4  -7    7.87    1.59
  -5  -4  -7   16.08    2.74
  -5  -4  -7   14.81    4.64
  -5  -4  -7   16.71    2.70
  -5  -4  -8   34.00    2.85
  -5  -4  -8   36.06    3.82
  -5  -4  -8   36.14    3.90
  -5  -4  -8   36.37    3.71
  -5  -4  -8   45.33    4.00
  -5  -4  -8   29.53    6.11
  -5  -4  -9   58.58    4.55
  -5  -4  -9   53.53    4.61
  -5  -4  -9   60.33    4.56
  -5  -4  -9   53.63    3.61
  -5  -4 -10   35.86    3.56
  -5  -4 -10   29.75    3.51
  -5  -4 -10   33.92    3.36
  -5  -4 -11    8.08    2.25
  -5  -4 -11   11.36    2.05
  -5  -4 -12    5.37    1.66
  -5  -4 -12    3.50    1.21
  -5  -5   8   26.87    2.74
   5   5  -7   34.13    2.51
  -5  -5   7   36.19    3.51
  -5  -5   6   16.57    3.05
   5   5  -6   12.38    1.79
  -5  -5   6   16.00    2.35
   5   5  -6   14.14    2.26
   5   5  -5  235.05   10.26
   5   5  -5  194.55    9.72
  -5  -5   5  206.98   10.77
  -5  -5   5  208.86   10.64
  -5  -5   4   -1.21    2.09
  -5  -5   4    1.56    2.26
   5   5  -4    1.59    1.42
  -5  -5   4    1.00    3.08
  -5  -5   3   85.03    7.51
  -5  -5   3   68.43    5.31
   5   5  -3   79.52    8.49
  -5  -5   3   75.38    4.82
  -5  -5   3   85.62    5.30
  -5  -5   3   68.01    7.36
  -5  -5   2   73.55    7.65
  -5  -5   2   71.41    6.76
  -5  -5   2   67.44    4.92
  -5  -5   2   70.65    4.68
  -5  -5   2   66.96    4.63
  -5  -5   1   89.55    7.14
  -5  -5   1   83.79    5.30
  -5  -5   1   81.24    4.98
  -5  -5   1   83.87    8.27
  -5  -5   1   76.70    5.15
  -5  -5   0  294.84   14.73
  -5  -5   0  258.44   12.46
  -5  -5   0  260.74   12.15
  -5  -5   0  253.38   12.70
  -5  -5   0  261.93   16.63
  -5  -5  -1    6.51    1.70
  -5  -5  -1    4.51    3.58
  -5  -5  -1    3.06    2.36
  -5  -5  -1    7.78    2.23
  -5  -5  -2   39.69    3.20
  -5  -5  -2   49.52    3.63
  -5  -5  -3   18.05    2.38
  -5  -5  -3   19.58    2.72
  -5  -5  -3   20.85    4.81
  -5  -5  -3   20.73    2.71
  -5  -5  -4   16.00    2.62
  -5  -5  -4   16.26    2.50
  -5  -5  -4   14.83    4.32
  -5  -5  -4   17.73    4.07
  -5  -5  -4   12.52    2.28
  -5  -5  -5  107.26    6.34
  -5  -5  -5  120.55    6.51
  -5  -5  -5   98.74    5.95
  -5  -5  -5  110.48    6.67
  -5  -5  -5  103.46    9.54
  -5  -5  -5   88.95    8.73
  -5  -5  -6    1.45    3.42
  -5  -5  -6    1.51    2.15
  -5  -5  -6    0.98    2.02
  -5  -5  -6    1.67    2.91
   5   5   6    0.64    3.32
  -5  -5  -6    1.48    1.65
  -5  -5  -7   22.23    2.97
  -5  -5  -7   20.77    2.83
  -5  -5  -7   17.98    2.13
  -5  -5  -7   15.61    3.01
  -5  -5  -7   12.40    4.31
  -5  -5  -8   51.10    4.19
  -5  -5  -8   42.07    6.74
  -5  -5  -8   47.17    4.13
  -5  -5  -9    0.66    2.13
  -5  -5  -9   -0.79    2.09
  -5  -5 -10    3.60    2.20
  -5  -5 -10    3.73    2.01
  -5  -5 -11   57.36    4.00
  -5  -5 -11   65.79    4.18
  -5  -6   7    6.20    1.77
  -5  -6   6   91.82    5.21
  -5  -6   5    5.00    2.10
  -5  -6   5    7.21    2.46
  -5  -6   4    9.08    2.43
  -5  -6   4    3.65    2.43
   5   6  -3   33.59    5.96
  -5  -6   3   43.47    3.96
  -5  -6   3   44.05    4.05
  -5  -6   3   39.84    3.29
  -5  -6   2   92.82    7.85
  -5  -6   2   79.15    5.51
  -5  -6   2   68.95    8.05
  -5  -6   2   86.97    5.26
  -5  -6   1   29.55    3.15
  -5  -6   1   28.77    3.16
  -5  -6   1   30.09    4.62
  -5  -6   1   28.05    5.57
  -5  -6   0   25.46    3.07
  -5  -6   0   25.62    2.85
  -5  -6   0   27.93    5.54
  -5  -6   0   27.45    4.42
  -5  -6  -1  250.34   15.76
  -5  -6  -1  239.55   13.26
  -5  -6  -1  213.13   10.54
  -5  -6  -1  220.49   10.68
  -5  -6  -1  227.07   11.17
  -5  -6  -1  215.55   10.65
  -5  -6  -2    5.48    1.90
  -5  -6  -2    8.80    2.05
  -5  -6  -2    6.71    2.30
  -5  -6  -3  166.04    8.64
  -5  -6  -3  167.44    8.50
  -5  -6  -3  143.26   11.90
  -5  -6  -3  155.08    8.55
  -5  -6  -4    5.86    2.24
  -5  -6  -4    4.03    3.83
  -5  -6  -4    6.97    2.22
  -5  -6  -4    6.02    2.10
  -5  -6  -5   14.36    2.62
  -5  -6  -5   11.72    2.19
  -5  -6  -5   14.58    2.66
  -5  -6  -5   13.43    4.00
  -5  -6  -6   91.92    5.87
  -5  -6  -6   89.51    5.23
  -5  -6  -6   68.12    7.89
  -5  -6  -6   68.48    7.54
  -5  -6  -6   79.74    5.01
  -5  -6  -6   86.42    5.56
  -5  -6  -7    2.55    1.80
  -5  -6  -7    5.90    2.33
  -5  -6  -7    1.10    2.23
  -5  -6  -7    3.68    1.51
  -5  -6  -8    4.57    2.33
  -5  -6  -8    7.55    2.06
  -5  -6  -8    9.84    2.57
  -5  -6  -9    4.47    2.33
  -5  -6  -9    2.23    1.99
  -5  -6 -10    4.24    2.04
  -5  -6 -10    6.45    1.96
  -5  -6 -11   19.55    2.11
  -5  -6 -11   20.89    2.24
  -5  -7   6    7.98    1.61
   5   7  -6    8.77    1.46
  -5  -7   5   17.13    2.30
  -5  -7   5   19.67    2.31
  -5  -7   4    3.23    1.78
  -5  -7   4    1.72    1.93
  -5  -7   3   30.82    2.91
  -5  -7   3   31.38    2.74
  -5  -7   3   30.48    3.27
  -5  -7   2   66.97    4.35
  -5  -7   2   76.96    5.17
  -5  -7   2   70.42    4.67
  -5  -7   1    2.31    2.00
  -5  -7   1   -0.68    3.76
  -5  -7   0   89.24    9.38
  -5  -7   0   91.71    5.85
  -5  -7   0  106.26    6.27
  -5  -7  -1   14.03    2.66
  -5  -7  -1   14.93    2.65
  -5  -7  -1   13.72    4.46
  -5  -7  -1   11.46    2.17
  -5  -7  -2   73.25    5.05
  -5  -7  -2   81.12    5.22
  -5  -7  -2   76.30    4.91
  -5  -7  -3   66.06    4.53
  -5  -7  -3   61.24    7.69
  -5  -7  -3   65.12    4.58
  -5  -7  -4    1.61    1.58
  -5  -7  -4    1.66    2.06
  -5  -7  -4    2.73    2.14
  -5  -7  -4    4.13    3.54
  -5  -7  -5   29.84    3.27
  -5  -7  -5   29.05    5.31
  -5  -7  -5   30.46    3.24
  -5  -7  -5   30.76    3.28
  -5  -7  -5   28.09    3.03
  -5  -7  -6   24.29    3.09
  -5  -7  -6   25.91    3.00
  -5  -7  -6   22.98    3.03
  -5  -7  -6   18.03    2.46
  -5  -7  -7    3.42    2.16
  -5  -7  -7   -1.14    2.05
  -5  -7  -7    0.21    2.14
  -5  -7  -7    1.97    1.40
  -5  -7  -8    2.08    1.86
  -5  -7  -8    4.48    2.16
  -5  -7  -8    0.17    2.03
  -5  -7  -9    3.59    1.71
  -5  -7 -10    0.96    1.46
   5   8  -4    2.05    1.29
  -5  -8   3    2.30    1.78
   5   8  -3    1.79    1.50
  -5  -8   2    9.80    2.34
  -5  -8   2    7.71    1.74
  -5  -8   1   18.51    2.37
  -5  -8   0    2.75    2.07
  -5  -8   0    1.01    1.80
  -5  -8  -1   60.29    4.46
  -5  -8  -1   65.69    4.54
  -5  -8  -1   60.32    4.08
  -5  -8  -2  137.00    7.29
  -5  -8  -2  147.91    7.55
  -5  -8  -3   -1.35    1.65
  -5  -8  -3   -0.65    1.90
  -5  -8  -4   22.55    2.78
  -5  -8  -4   25.10    2.87
  -5  -8  -4   19.88    2.71
  -5  -8  -5   12.15    2.30
  -5  -8  -5    9.01    2.23
  -5  -8  -5   14.81    2.41
  -5  -8  -6   46.24    3.51
  -5  -8  -6   46.01    3.62
  -5  -8  -6   46.69    3.64
  -5  -8  -6   43.64    3.27
  -5  -8  -7   16.24    2.12
  -5  -8  -7   11.39    2.13
  -5  -8  -7   13.82    2.17
  -5  -8  -8    4.43    1.53
  -5  -8  -8    3.51    1.64
  -5  -8  -8    3.49    1.74
  -5  -8  -9    1.46    1.26
  -5  -8  -9   -1.90    1.23
   5   9  -2    3.10    1.18
  -5  -9   1    3.60    1.34
  -5  -9   0   -1.38    1.52
  -5  -9  -1    3.16    1.57
  -5  -9  -1    6.76    1.54
  -5  -9  -2    4.00    1.73
  -5  -9  -2    3.28    1.56
  -5  -9  -3   25.47    2.47
  -5  -9  -3   18.45    2.29
  -5  -9  -4   42.79    2.97
  -5  -9  -4   37.49    2.99
  -5  -9  -5   16.74    2.13
  -5  -9  -5   14.95    1.98
  -5  -9  -5   14.75    1.96
  -5  -9  -6    0.71    1.53
  -5  -9  -6    0.68    1.31
  -5  -9  -6    1.15    1.19
  -5  -9  -7    3.65    1.38
  -6   9   3    2.12    1.19
   6  -9  -3   -0.09    1.11
  -6   9   2   20.15    1.96
   6  -9  -1    1.88    1.25
  -6   9   0    5.73    1.32
   6  -9   0    7.07    1.43
   6  -8  -6    0.18    0.82
  -6   8   5   16.60    1.81
  -6   8   4   55.52    3.59
  -6   8   3    2.84    1.64
   6  -8  -3    1.53    1.62
  -6   8   2    0.86    1.66
  -6   8   1    6.50    1.93
   6  -8  -1    9.71    1.98
  -6   8   0   20.11    2.51
   6  -8   0   30.21    2.75
  -6   8  -1   92.09    5.29
  -6   8  -1   90.01    4.84
   6  -8   1  102.77    5.37
  -6   8  -2   13.36    1.71
  -6   8  -2    9.86    1.73
  -6   8  -3   13.99    1.74
   6  -8   3   16.95    1.73
  -6   8  -4    0.34    1.13
   6  -7  -7   17.59    1.91
   6  -7  -6    8.34    1.72
   6  -7  -5   31.17    2.54
  -6   7   5   28.31    2.62
   6  -7  -5   26.00    2.09
   6  -7  -5   24.44    2.42
   6  -7  -4   58.12    3.86
  -6   7   4   62.23    4.27
   6  -7  -3   17.51    2.55
  -6   7   3   16.20    2.53
  -6   7   2   27.38    3.16
   6  -7  -1   -0.69    1.97
  -6   7   1    1.94    2.22
   6  -7   0   22.25    2.95
  -6   7  -1   62.38    4.01
   6  -7   1   74.54    4.71
  -6   7  -1   63.07    4.50
  -6   7  -2   33.72    2.88
   6  -7   2   38.92    3.21
  -6   7  -2   29.25    3.04
  -6   7  -3   37.98    2.97
   6  -7   3   37.54    2.91
  -6   7  -3   31.04    2.86
  -6   7  -4  146.75    7.40
  -6   7  -5    7.07    1.69
  -6   7  -6   23.66    2.05
   6  -6  -8    2.66    1.27
   6  -6  -8    3.81    1.64
   6  -6  -7   37.86    2.84
   6  -6  -7   45.09    3.37
   6  -6  -6    4.02    1.57
   6  -6  -5    2.54    1.40
   6  -6  -5    2.77    1.68
  -6   6   5    5.38    1.93
   6  -6  -4    4.21    2.00
  -6   6   4    3.92    2.05
   6  -6  -3   23.04    2.97
  -6   6   3   22.86    5.45
  -6   6   3   23.68    3.03
  -6   6   2  143.62   12.38
   6  -6  -2  152.33   11.95
  -6   6   2  154.06    8.32
   6  -6  -2  149.25    8.20
  -6   6   1   34.81    3.69
   6  -6  -1   37.21    3.51
  -6   6   1   31.99    6.07
  -6   6   0    9.27    1.81
   6  -6   0   15.52    4.90
   6  -6   0    9.59    2.36
   6  -6   1  117.79   10.53
  -6   6  -1   99.72   10.37
  -6   6  -1  124.96    6.51
   6  -6   1  120.84    9.91
   6  -6   1  123.42    7.04
  -6   6  -1  123.38    7.08
  -6   6  -2   13.43    2.33
  -6   6  -2   11.60    2.46
   6  -6   2   16.12    2.60
  -6   6  -3   73.90    4.85
  -6   6  -3   79.35    4.88
   6  -6   3   75.44    4.84
  -6   6  -4   35.11    2.95
  -6   6  -4   35.51    3.22
   6  -6   4   32.33    2.82
  -6   6  -5  126.15    6.23
  -6   6  -5   97.98    5.56
  -6   6  -6    7.41    1.92
  -6   6  -6    6.35    1.47
  -6   6  -7   13.18    1.83
  -6   6  -7    7.45    1.39
   6  -5  -9    1.54    1.45
   6  -5  -9    0.76    1.25
   6  -5  -8    2.36    1.78
   6  -5  -8    5.91    1.61
   6  -5  -7  183.21    8.96
   6  -5  -6   41.38    3.20
   6  -5  -5   21.43    2.45
   6  -5  -5   22.32    2.57
  -6   5   5   26.18    2.80
   6  -5  -4   11.59    1.91
   6  -5  -4   14.49    2.41
   6  -5  -4   12.27    4.13
  -6   5   4   16.36    2.68
  -6   5   3    3.72    4.19
   6  -5  -3    6.67    2.16
   6  -5  -3    0.66    3.54
  -6   5   3    6.35    2.29
  -6   5   2   32.81    6.30
   6  -5  -2   30.98    3.15
  -6   5   2   28.94    3.37
   6  -5  -2   19.13    4.83
  -6   5   1  149.53    8.50
  -6   5   1  176.80   13.29
   6  -5   0    4.16    2.19
   6  -5   0    4.91    4.00
  -6   5   0    4.13    1.61
  -6   5  -1  118.39   11.09
  -6   5  -1  117.29    6.57
  -6   5  -1  123.08    7.13
   6  -5   1  137.85    7.42
   6  -5   1  131.10   10.83
  -6   5  -2   49.01    7.13
  -6   5  -2   58.09    4.03
  -6   5  -2   50.99    4.17
   6  -5   2   60.24    4.30
   6  -5   2   46.32    6.63
   6  -5   3  114.05   10.12
  -6   5  -3  107.46   10.41
  -6   5  -3  137.54    7.05
  -6   5  -3  114.67    6.49
  -6   5  -3  129.28    7.09
   6  -5   3  134.65    7.10
  -6   5  -4    4.37    2.33
  -6   5  -4    5.55    1.91
  -6   5  -4    6.17    3.43
   6  -5   4    7.67    3.92
   6  -5   4    3.58    1.82
  -6   5  -5    4.19    2.18
  -6   5  -5    3.01    1.52
  -6   5  -6  211.20    9.94
  -6   5  -6  186.69    9.69
  -6   5  -7   21.67    2.54
  -6   5  -8   17.54    1.98
   6  -4 -10    5.90    1.37
   6  -4 -10    4.57    1.36
   6  -4  -9   34.50    2.24
   6  -4  -9   41.66    2.90
   6  -4  -9   37.60    3.05
   6  -4  -8   26.94    2.10
   6  -4  -8   29.62    2.75
   6  -4  -7  164.66    8.35
  -6   4   6   34.69    3.02
  -6   4   5   92.59    5.38
   6  -4  -5   87.50    7.99
   6  -4  -5   86.27    5.23
  -6   4   4   13.16    2.47
  -6   4   4   12.90    4.42
   6  -4  -4   11.19    2.23
   6  -4  -4   11.32    3.89
  -6   4   3  162.30    8.44
   6  -4  -3  151.53   11.60
   6  -4  -3  148.36    8.29
   6  -4  -2   34.55    3.32
  -6   4   2   27.06    3.23
  -6   4   2   24.99    5.74
  -6   4   1  199.17   10.31
  -6   4   1  212.14   14.76
   6  -4   0    1.38    1.96
  -6   4   0    2.54    1.51
  -6   4   0    4.46    2.26
  -6   4   0    2.21    4.03
   6  -4   1    2.34    1.97
  -6   4  -1    5.25    1.78
  -6   4  -1    4.96    2.28
  -6   4  -1    2.19    4.11
  -6   4  -2    6.46    4.15
  -6   4  -2   -0.65    1.50
  -6   4  -2    3.19    1.87
   6  -4   2    1.91    1.99
  -6   4  -2    1.99    2.12
   6  -4   3   12.63    2.27
  -6   4  -3    9.67    2.30
  -6   4  -3    7.86    1.98
  -6   4  -3   13.15    2.36
   6  -4   3    7.09    3.60
   6  -4   4   32.03    5.38
  -6   4  -4   36.78    5.77
  -6   4  -4   40.14    3.56
  -6   4  -4   35.46    3.21
   6  -4   4   40.10    3.31
  -6   4  -5   80.57    5.11
  -6   4  -5   68.76    4.45
  -6   4  -6  201.42    9.58
  -6   4  -6  170.59    9.22
  -6   4  -7    3.45    2.03
  -6   4  -7    3.06    2.02
  -6   4  -9   50.74    3.24
  -6   4  -9   42.55    3.16
   6  -3 -10    4.16    0.91
   6  -3 -10    7.37    1.49
   6  -3 -10    6.05    1.40
   6  -3  -9   -0.07    1.06
   6  -3  -8   20.57    1.94
  -6   3   7   58.61    3.92
  -6   3   6   13.62    2.35
   6  -3  -5  143.65   10.85
  -6   3   5  157.44    8.24
   6  -3  -5  164.54    8.29
  -6   3   5  172.51    8.68
   6  -3  -4  299.93   14.46
  -6   3   4  321.94   14.54
  -6   3   4  292.26   18.44
   6  -3  -3  239.45   12.48
  -6   3   3  276.35   12.62
  -6   3   3  277.23   16.96
   6  -3  -2  997.90   45.02
  -6   3   2 1097.59   45.05
  -6   3   1    5.77    2.18
   6  -3   0   81.33    5.16
  -6   3   0   71.47    4.97
   6  -3   1  277.10   13.00
  -6   3  -1  260.69   12.16
  -6   3  -1  261.96   12.21
   6  -3   2   19.53    2.72
  -6   3  -2   18.30    2.58
  -6   3  -2   20.65    2.30
  -6   3  -2   18.99    2.38
  -6   3  -3   64.92    7.74
   6  -3   3   74.19    4.91
  -6   3  -3   70.14    4.82
  -6   3  -3   72.56    4.65
  -6   3  -3   72.56    4.67
  -6   3  -4   24.78    2.77
   6  -3   4   28.45    2.98
  -6   3  -4   37.72    3.24
  -6   3  -4   33.24    5.42
  -6   3  -5   46.51    6.10
   6  -3   5   41.42    3.35
  -6   3  -5   44.10    3.50
  -6   3  -5   51.22    4.02
  -6   3  -5   44.84    3.37
  -6   3  -6  111.49    6.43
  -6   3  -6  103.76    6.09
  -6   3  -7   46.67    3.81
  -6   3  -7   41.40    3.54
  -6   3  -8    5.40    2.03
  -6   3  -9   24.51    2.57
  -6   3  -9   23.55    2.59
  -6   3 -10   11.66    1.67
  -6   3 -10   12.71    1.82
   6  -2 -10   43.64    2.44
   6  -2 -10   40.29    2.53
  -6   2   9    5.57    1.45
   6  -2  -9    7.89    1.45
   6  -2  -9    7.06    1.53
   6  -2  -8   29.87    2.39
  -6   2   8   36.05    3.06
  -6   2   7    3.67    1.83
  -6   2   6   28.99    3.09
   6  -2  -5  114.93    6.12
  -6   2   5  108.03    6.48
  -6   2   5  104.94    5.99
  -6   2   4   32.15    5.61
   6  -2  -4   37.42    3.28
  -6   2   4   39.22    3.28
  -6   2   3  202.52   13.94
   6  -2  -3  199.55   10.31
  -6   2   3  212.66   10.27
  -6   2   2   37.20    6.04
   6  -2  -2   38.98    3.40
  -6   2   2   36.14    3.25
  -6   2   1  186.39   13.34
  -6   2   1  188.84    9.58
   6  -2  -1  192.30    9.74
   6  -2   0   33.70    3.08
  -6   2   0   31.97    2.53
  -6   2   0   33.42    3.15
  -6   2  -1  121.46    6.33
  -6   2  -1  119.69    6.23
   6  -2   1  125.18    6.90
  -6   2  -2   10.79    4.38
   6  -2   2    9.28    2.16
  -6   2  -2   12.64    1.97
  -6   2  -2   12.14    2.01
  -6   2  -2   12.28    2.23
  -6   2  -3   16.91    4.55
   6  -2   3   10.96    2.17
  -6   2  -3   12.93    2.22
  -6   2  -3   12.47    2.19
  -6   2  -3   13.64    2.30
  -6   2  -4  418.59   22.35
   6  -2   4  389.67   18.17
  -6   2  -4  404.74   18.18
  -6   2  -4  391.56   17.99
  -6   2  -4  399.94   18.07
  -6   2  -5   14.99    4.04
  -6   2  -5   19.94    2.75
  -6   2  -5   19.17    2.29
   6  -2   5   15.79    2.33
  -6   2  -6   64.22    4.54
  -6   2  -6   58.89    4.11
  -6   2  -6   59.49    3.74
  -6   2  -7  105.95    6.18
   6  -2   7  111.72    8.85
  -6   2  -7  112.29    6.54
  -6   2  -8   81.53    5.18
  -6   2  -8   89.32    5.53
  -6   2  -8   87.71    5.50
  -6   2  -9    5.63    2.05
  -6   2  -9    2.68    1.82
  -6   2 -10    1.34    1.45
  -6   2 -11    0.64    1.08
   6  -1 -10   35.39    2.25
   6  -1 -10   40.88    2.53
   6  -1  -9    0.42    1.38
   6  -1  -9   -0.60    1.20
  -6   1   9   -0.77    1.51
  -6   1   8    3.38    1.71
  -6   1   8    1.82    1.85
   6  -1  -8    2.11    1.36
   6  -1  -7   52.40    3.29
  -6   1   7   65.04    4.33
  -6   1   6   10.88    2.49
  -6   1   5   97.42    5.70
   6  -1  -5   74.60    4.81
   6  -1  -4   16.23    2.24
  -6   1   4   21.51    4.61
  -6   1   4   16.39    2.26
  -6   1   4   15.33    2.65
   6  -1  -3   22.39    2.68
  -6   1   3   18.69    2.47
  -6   1   3   24.85    4.96
   6  -1  -2  123.70    6.82
  -6   1   2  117.90    6.65
  -6   1   2  123.99   10.14
   6  -1  -1  207.07   10.69
  -6   1   1  225.08   10.67
  -6   1   1  221.82   14.67
   6  -1   0  571.26   26.36
  -6   1   0  617.93   26.29
  -6   1   0  612.23   30.85
  -6   1  -1  159.16    7.75
  -6   1  -1  154.60    7.51
   6  -1   1  146.35    8.07
  -6   1  -2  113.16    6.14
  -6   1  -2  123.14    6.40
   6  -1   2  114.99    6.68
  -6   1  -2  122.06    6.53
  -6   1  -2  118.18    9.86
  -6   1  -3   95.44    5.35
  -6   1  -3   93.28    5.49
   6  -1   3   91.22    5.62
  -6   1  -3   92.68    5.44
  -6   1  -3  105.89    9.01
  -6   1  -4   23.25    2.71
  -6   1  -4   32.01    3.09
   6  -1   4   27.57    2.85
  -6   1  -4   27.05    2.69
  -6   1  -4   27.81    4.89
  -6   1  -5   23.92    2.89
  -6   1  -5   23.97    2.93
   6  -1   5   23.54    2.56
  -6   1  -5   17.27    3.95
  -6   1  -5   23.26    2.41
  -6   1  -6  202.34   10.42
  -6   1  -6  205.84   10.33
  -6   1  -7  147.73    8.08
  -6   1  -7  175.17    8.75
  -6   1  -7  165.95    8.77
  -6   1  -8   27.62    3.35
  -6   1  -8   25.41    2.78
  -6   1  -9   89.79    5.31
  -6   1  -9   76.25    5.40
  -6   1 -10    2.23    1.66
  -6   1 -10   -0.28    1.65
  -6   1 -10    1.60    1.82
  -6   1 -11    3.16    1.29
  -6   1 -11    2.20    1.33
   6   0 -10    8.40    1.15
   6   0 -10   10.77    1.49
   6   0  -9   61.15    3.58
   6   0  -9   68.95    3.64
   6   0  -9   65.48    3.94
  -6   0   9   58.76    4.03
   6   0  -8    6.08    1.54
  -6   0   8   10.61    2.30
   6   0  -8    9.80    1.64
  -6   0   8   12.76    2.30
   6   0  -7   21.15    2.14
  -6   0   7   23.98    2.93
   6   0  -6   38.76    2.79
  -6   0   6   47.36    3.96
   6   0  -5    5.64    1.40
   6   0  -5    4.51    1.65
  -6   0   5    7.94    2.39
   6   0  -4  262.25   12.57
  -6   0   4  264.75   16.22
  -6   0   4  262.11   12.87
   6   0  -3   32.23    3.19
  -6   0   3   38.92    3.20
  -6   0   3   40.38    3.60
  -6   0   2  167.73   12.01
  -6   0   2  164.04    8.56
   6   0  -2  183.29   12.84
  -6   0   1   41.77    5.92
   6   0  -1   35.47    5.88
  -6   0   1   38.59    3.23
  -6   0   0  188.01   12.86
  -6   0   0  178.43    9.04
   6   0   1    7.17    4.18
  -6   0  -1    5.57    1.60
  -6   0  -1    2.95    1.35
  -6   0  -2    8.73    1.79
  -6   0  -2    8.24    3.98
   6   0   2    3.92    3.98
  -6   0  -2   11.71    2.04
  -6   0  -2    9.20    1.96
   6   0   3  141.48   11.23
  -6   0  -3  139.90    7.33
  -6   0  -3  135.70    7.10
  -6   0  -3  132.64    7.17
  -6   0  -3  143.79   10.62
  -6   0  -4   49.00    6.13
  -6   0  -4   53.75    3.75
   6   0   4   51.11    3.79
  -6   0  -4   44.94    3.48
  -6   0  -4   51.84    3.87
  -6   0  -5   20.40    2.67
  -6   0  -5   18.99    4.40
   6   0   5   14.01    2.30
  -6   0  -5   15.41    2.51
  -6   0  -6    3.56    2.16
  -6   0  -6    5.61    2.35
  -6   0  -6    2.75    1.85
  -6   0  -6    2.47    2.63
  -6   0  -7   14.03    2.26
  -6   0  -7   12.73    2.70
  -6   0  -8  115.91    6.57
  -6   0  -8  123.92    7.44
  -6   0  -8  120.50    6.56
  -6   0  -8  130.63    7.18
  -6   0  -8  116.90   10.91
  -6   0  -9  125.36    6.93
  -6   0  -9  112.63    7.19
  -6   0  -9  130.31    7.04
  -6   0 -10    9.40    1.99
  -6   0 -10    8.91    2.33
  -6   0 -10    7.57    1.94
  -6   0 -11    2.73    1.73
  -6   0 -11    2.52    1.33
   6   1 -10  104.56    4.85
   6   1  -9    1.39    1.21
  -6  -1   9    0.70    1.61
   6   1  -9    0.72    1.12
  -6  -1   9    2.08    1.41
   6   1  -9    3.62    1.50
   6   1  -8  117.69    5.97
  -6  -1   8  120.44    6.65
  -6  -1   8  120.55    6.76
   6   1  -8  116.12    6.28
   6   1  -7   36.23    2.76
  -6  -1   7   35.24    3.49
  -6  -1   7   31.72    3.51
   6   1  -6   26.16    2.38
  -6  -1   6   26.26    3.25
   6   1  -5   38.45    2.79
  -6  -1   5   41.70    3.83
  -6  -1   4    1.15    2.81
  -6  -1   4    4.59    2.33
   6   1  -4    4.51    1.36
  -6  -1   3  219.94   14.16
  -6  -1   3  215.68   10.62
   6   1  -3  199.23    9.35
   6   1  -2  485.74   25.41
  -6  -1   2  435.27   24.64
  -6  -1   1  139.88   10.80
   6   1  -1  151.11   11.46
  -6  -1   1  140.07    7.55
  -6  -1   0   41.92    3.45
  -6  -1   0   48.76    6.21
  -6  -1  -1   73.54    4.32
  -6  -1  -1   81.14    4.96
  -6  -1  -2   54.83    3.79
   6   1   2   63.52    7.38
  -6  -1  -2   48.08    6.22
  -6  -1  -2   48.75    3.45
  -6  -1  -3   38.82    3.13
  -6  -1  -3   38.31    5.57
   6   1   3   31.14    5.42
  -6  -1  -3   30.81    2.84
  -6  -1  -4  106.46    5.94
  -6  -1  -4  118.63    6.34
   6   1   4   98.87    9.48
  -6  -1  -4  106.69    6.06
  -6  -1  -4  104.75    9.28
  -6  -1  -5  269.86   13.05
   6   1   5  258.02   16.97
  -6  -1  -5  272.72   13.17
  -6  -1  -5  264.19   16.55
  -6  -1  -5  307.74   13.50
  -6  -1  -6   38.76    2.94
  -6  -1  -6   33.65    4.81
  -6  -1  -6   42.98    3.65
  -6  -1  -6   35.02    3.37
  -6  -1  -7   54.90    4.30
  -6  -1  -7   62.28    4.55
  -6  -1  -7   64.72    4.56
  -6  -1  -7   53.78    4.29
  -6  -1  -8  105.83    6.32
  -6  -1  -8   89.36    5.90
  -6  -1  -8   99.04   10.03
  -6  -1  -9    4.64    2.45
  -6  -1  -9    6.76    2.20
  -6  -1  -9    4.57    2.15
  -6  -1 -10    7.06    1.89
  -6  -1 -10    7.89    2.54
  -6  -1 -11   23.76    2.17
  -6  -1 -11   23.33    2.68
   6   2  -9   23.50    1.88
   6   2  -9   23.74    2.08
   6   2  -8    1.25    1.42
  -6  -2   8    1.03    1.97
  -6  -2   8    0.17    1.83
   6   2  -8    2.63    1.59
   6   2  -7   10.67    1.82
  -6  -2   7    7.74    2.52
  -6  -2   7    7.08    2.27
   6   2  -6    4.14    1.67
  -6  -2   6    1.91    2.31
  -6  -2   6    1.91    2.42
   6   2  -5   47.18    3.17
  -6  -2   5   38.24    3.97
   6   2  -4  110.80    5.81
  -6  -2   4  114.94    6.23
  -6  -2   4  115.03    9.29
   6   2  -4  107.94    9.55
  -6  -2   4  117.47    6.96
  -6  -2   3   -1.81    3.11
   6   2  -3    1.98    1.34
   6   2  -3    0.66    3.50
  -6  -2   3    0.80    1.60
  -6  -2   2   91.32    8.55
   6   2  -2   86.78    8.91
  -6  -2   2   77.86    5.24
   6   2  -2   80.48    4.27
  -6  -2   1   55.92    4.10
   6   2  -1   57.81    7.40
  -6  -2   1   54.75    6.85
  -6  -2   0  389.85   21.88
  -6  -2   0  386.18   17.61
  -6  -2  -1  284.85   17.20
  -6  -2  -1  267.10   12.77
   6   2   1  296.11   17.59
  -6  -2  -2   18.42    2.19
   6   2   2   19.93    4.78
  -6  -2  -3    6.87    1.58
   6   2   3    4.67    4.01
  -6  -2  -3    5.56    3.48
  -6  -2  -4  195.89    9.65
   6   2   4  190.02   13.73
  -6  -2  -4  181.82    9.66
  -6  -2  -4  213.73    9.77
  -6  -2  -4  168.66   12.70
  -6  -2  -5   48.62    5.91
  -6  -2  -5   44.10    3.56
  -6  -2  -5   41.08    3.29
  -6  -2  -5   48.63    3.84
  -6  -2  -6   11.06    4.22
   6   2   6    7.42    3.68
  -6  -2  -6   12.10    2.54
  -6  -2  -6    8.71    2.31
  -6  -2  -6    8.22    2.39
  -6  -2  -6   10.48    1.85
  -6  -2  -6   12.77    3.33
  -6  -2  -7    0.19    2.11
  -6  -2  -7    0.60    1.97
  -6  -2  -7    0.78    3.72
  -6  -2  -7    4.41    2.27
  -6  -2  -8    0.51    1.96
  -6  -2  -8    2.91    2.30
  -6  -2  -8    1.35    2.19
  -6  -2  -9   34.05    3.12
  -6  -2  -9   32.28    3.58
  -6  -2  -9   30.46    3.02
  -6  -2 -10    6.99    1.78
  -6  -2 -10    1.65    1.54
  -6  -2 -10    4.76    2.14
  -6  -2 -11   19.12    2.56
   6   3  -9   26.94    2.06
   6   3  -9   28.81    2.00
  -6  -3   8   20.14    2.49
   6   3  -8   17.52    2.00
   6   3  -8   19.68    1.92
  -6  -3   7   47.61    4.07
  -6  -3   7   43.61    3.92
   6   3  -7   49.08    3.45
   6   3  -7   52.99    3.33
   6   3  -6    4.78    1.68
  -6  -3   6    1.70    2.19
   6   3  -5   25.41    2.54
  -6  -3   5   21.91    3.25
   6   3  -4    0.61    3.29
  -6  -3   4    2.69    2.26
   6   3  -4    1.93    1.59
  -6  -3   4    4.51    1.72
  -6  -3   3   53.40    4.49
   6   3  -3   58.94    3.62
   6   3  -3   43.61    6.67
  -6  -3   3   54.85    6.47
  -6  -3   3   55.87    4.01
  -6  -3   2  157.12   11.88
  -6  -3   2  148.65    8.43
  -6  -3   2  170.66    8.47
   6   3  -2  157.20   12.57
  -6  -3   1   88.38    8.59
  -6  -3   1   85.58    5.48
  -6  -3   1   92.56    5.54
   6   3  -1   83.04    8.92
  -6  -3   0   90.80    8.71
  -6  -3   0   90.54    5.47
  -6  -3   0   97.24    5.67
   6   3   0   89.23    9.36
  -6  -3  -1  316.68   18.62
  -6  -3  -1  287.22   13.82
  -6  -3  -1  311.76   14.31
   6   3   1  308.82   18.82
  -6  -3  -2   28.69    4.24
  -6  -3  -2   27.86    2.50
   6   3   2   27.68    5.55
  -6  -3  -3  189.08    9.51
   6   3   3  188.12   13.65
  -6  -3  -3  188.01   12.45
  -6  -3  -3  183.11   13.08
  -6  -3  -4   43.13    5.97
  -6  -3  -4   50.72    3.84
  -6  -3  -4   46.76    3.74
   6   3   4   49.52    6.92
  -6  -3  -4   43.66    5.99
   6   3   5   -0.68    4.31
  -6  -3  -5    2.36    1.65
  -6  -3  -5    3.16    1.75
  -6  -3  -5    4.71    3.41
  -6  -3  -5    1.96    2.00
  -6  -3  -5    2.91    2.90
  -6  -3  -6  113.09    6.34
  -6  -3  -6  102.91    5.71
  -6  -3  -6   82.86    8.01
  -6  -3  -6  112.40   10.00
  -6  -3  -6  110.16    6.52
   6   3   6   70.03    8.34
  -6  -3  -7    0.19    2.16
  -6  -3  -7    1.05    2.05
  -6  -3  -7   -0.77    3.34
  -6  -3  -7    1.71    1.37
  -6  -3  -8    1.57    3.32
  -6  -3  -8    7.11    2.21
  -6  -3  -8    2.33    2.29
  -6  -3  -8    6.29    2.40
  -6  -3  -9   95.43    5.99
  -6  -3 -10   -0.49    1.60
  -6  -3 -11    0.89    1.19
   6   4  -8   28.63    2.09
   6   4  -8   24.74    2.02
  -6  -4   8   31.77    2.64
   6   4  -7   20.48    2.01
  -6  -4   7   20.90    2.71
   6   4  -7   13.57    1.78
   6   4  -6   19.80    2.20
   6   4  -6   16.87    2.08
  -6  -4   6   19.15    2.30
   6   4  -5  134.76    6.80
  -6  -4   5  130.47    7.59
  -6  -4   5  125.09    7.62
  -6  -4   4   16.92    2.18
  -6  -4   4   17.89    2.93
   6   4  -4   19.97    2.32
  -6  -4   3   19.88    4.55
  -6  -4   3   24.83    2.84
   6   4  -3   30.04    2.68
  -6  -4   3   25.13    3.07
   6   4  -3   18.66    5.03
  -6  -4   3   30.59    3.54
  -6  -4   2    2.40    2.19
  -6  -4   2    2.88    1.81
  -6  -4   2    2.16    1.92
   6   4  -2    8.06    4.59
  -6  -4   2    4.52    3.38
  -6  -4   1    3.14    2.13
  -6  -4   1    1.29    2.02
  -6  -4   1    3.10    1.87
   6   4  -1    1.48    4.06
  -6  -4   1   -0.67    3.60
  -6  -4   0    8.55    2.17
  -6  -4   0    8.74    2.38
  -6  -4   0    8.81    1.86
   6   4   0    7.39    4.94
  -6  -4   0    5.43    3.78
  -6  -4  -1   19.32    2.75
  -6  -4  -1   21.97    2.42
  -6  -4  -1   15.90    1.96
   6   4   2   53.86    7.61
  -6  -4  -2   48.28    3.33
  -6  -4  -3  154.70    8.35
   6   4   3  168.92   12.86
  -6  -4  -3  150.40   11.80
  -6  -4  -4   37.61    5.49
  -6  -4  -4   33.80    2.97
  -6  -4  -4   24.98    5.36
  -6  -4  -4   38.97    3.40
   6   4   4   32.97    6.34
   6   4   5   20.33    5.22
  -6  -4  -5   16.57    2.37
  -6  -4  -5   15.78    2.66
  -6  -4  -5   11.52    3.97
  -6  -4  -5   13.85    4.05
  -6  -4  -5   14.46    2.30
  -6  -4  -6   51.47    4.24
  -6  -4  -6   49.97    3.71
  -6  -4  -6   58.52    4.32
  -6  -4  -6   47.39    6.85
  -6  -4  -6   48.54    5.90
  -6  -4  -6   50.19    3.91
  -6  -4  -7   33.27    3.48
  -6  -4  -7   27.17    5.56
  -6  -4  -7   23.25    2.36
  -6  -4  -7   32.08    3.43
  -6  -4  -8   15.59    2.89
  -6  -4  -8   19.56    2.81
  -6  -4  -8   14.72    2.73
  -6  -4  -9    8.39    2.42
  -6  -4  -9    8.72    2.42
  -6  -4  -9    8.64    2.49
  -6  -4 -10    3.93    2.08
  -6  -4 -10    4.23    1.80
  -6  -4 -11   10.08    1.92
  -6  -4 -11    8.39    1.56
   6   5  -7    2.44    1.16
  -6  -5   6   32.11    3.22
   6   5  -6   34.17    2.57
  -6  -5   6   32.37    2.70
   6   5  -5   42.52    3.03
  -6  -5   5   33.38    3.19
   6   5  -4  101.56    5.38
  -6  -5   4   88.27    6.04
  -6  -5   4   93.59    5.88
  -6  -5   3   80.12    5.27
  -6  -5   3   81.18    5.00
  -6  -5   3   85.21    5.68
  -6  -5   2   14.97    2.74
  -6  -5   2   11.12    2.26
  -6  -5   2   12.31    2.21
   6   5  -2   15.39    4.82
  -6  -5   2    9.69    3.86
  -6  -5   1   16.60    2.30
  -6  -5   1   12.96    4.45
  -6  -5   1   10.77    2.59
   6   5  -1   18.22    5.33
  -6  -5   1   10.04    2.37
  -6  -5   0   29.75    2.65
  -6  -5   0   18.93    5.00
   6   5   0   26.29    5.89
  -6  -5   0   34.23    3.42
  -6  -5   0   31.06    3.01
  -6  -5  -1   38.76    3.71
  -6  -5  -1   36.55    3.03
  -6  -5  -2   22.78    2.89
   6   5   2   23.87    5.90
  -6  -5  -3   13.13    4.46
  -6  -5  -3   13.73    2.58
  -6  -5  -3   12.19    2.46
   6   5   3    7.60    4.30
  -6  -5  -4   13.35    4.40
  -6  -5  -4   15.34    2.56
  -6  -5  -4   15.03    2.60
  -6  -5  -4   10.80    2.09
   6   5   4    8.89    4.47
  -6  -5  -5    1.51    1.81
  -6  -5  -5    0.62    3.05
  -6  -5  -5    3.01    2.31
  -6  -5  -5    1.72    2.20
  -6  -5  -5    2.66    1.93
   6   5   5   -0.71    3.90
  -6  -5  -6   58.48    4.23
  -6  -5  -6   58.50    3.93
  -6  -5  -6   53.81    6.35
  -6  -5  -6   50.64    6.68
  -6  -5  -6   61.19    4.41
  -6  -5  -7   33.84    3.33
  -6  -5  -7   30.72    3.30
  -6  -5  -7   40.20    3.60
  -6  -5  -7   29.18    2.63
  -6  -5  -8    4.05    2.27
  -6  -5  -8    0.92    1.94
  -6  -5  -9    6.64    2.17
  -6  -5  -9    6.00    2.08
  -6  -5  -9    9.20    2.27
  -6  -5 -10   30.08    2.83
  -6  -5 -10   33.04    2.92
  -6  -5 -10   31.72    2.90
  -6  -5 -11   11.87    1.71
  -6  -5 -11   13.12    1.72
  -6  -6   6    1.30    1.38
   6   6  -6    1.69    1.10
   6   6  -5   15.81    1.86
  -6  -6   5   14.78    2.13
  -6  -6   5   17.76    2.54
   6   6  -4   26.90    2.44
  -6  -6   4   23.11    3.01
  -6  -6   4   26.55    2.94
  -6  -6   3   13.41    2.04
   6   6  -3   12.71    2.08
  -6  -6   3   14.13    2.60
  -6  -6   3   11.89    2.57
  -6  -6   2   26.34    3.20
  -6  -6   2   31.20    2.96
  -6  -6   2   31.80    3.27
  -6  -6   1    7.40    3.89
  -6  -6   1    4.05    2.09
  -6  -6   1    1.58    1.93
  -6  -6   0  128.61    7.20
  -6  -6   0  121.00    6.76
  -6  -6   0  124.74   10.76
   6   6   0  127.75   11.79
  -6  -6  -1    0.92    1.49
  -6  -6  -1    1.43    3.30
  -6  -6  -1    0.38    2.10
  -6  -6  -2   47.78    7.04
  -6  -6  -2   52.92    4.19
  -6  -6  -2   49.76    3.81
  -6  -6  -3   64.43    7.68
   6   6   3   63.44    8.36
  -6  -6  -3   73.10    4.85
  -6  -6  -3   63.01    4.20
  -6  -6  -4    1.57    1.73
   6   6   4    2.24    4.27
  -6  -6  -4    2.85    1.94
  -6  -6  -4    0.67    3.24
  -6  -6  -4    2.77    2.03
  -6  -6  -5    3.66    2.16
  -6  -6  -5    3.11    1.87
  -6  -6  -5    1.65    1.94
  -6  -6  -5    1.89    3.25
  -6  -6  -5    2.55    2.25
  -6  -6  -6    3.15    1.95
  -6  -6  -6    2.92    1.71
  -6  -6  -6    4.87    2.19
  -6  -6  -6    7.09    2.43
  -6  -6  -7    7.37    1.61
  -6  -6  -7    9.40    2.19
  -6  -6  -7   11.12    2.51
  -6  -6  -9   20.25    2.52
  -6  -6 -10    7.37    1.67
   6   7  -5    6.05    1.20
  -6  -7   4    8.26    1.69
   6   7  -4    8.81    1.50
  -6  -7   3    0.79    1.74
   6   7  -3    2.04    1.43
  -6  -7   2   11.13    1.93
  -6  -7   2   12.85    2.32
  -6  -7   1   10.64    2.18
  -6  -7   0    3.74    1.96
  -6  -7   0    7.68    2.24
  -6  -7  -1  137.33    7.24
  -6  -7  -1  117.78    7.11
  -6  -7  -2    7.34    2.33
  -6  -7  -2    8.45    2.21
  -6  -7  -3   14.76    2.14
  -6  -7  -3   20.06    2.46
  -6  -7  -4    2.51    1.91
  -6  -7  -4   -1.43    1.48
  -6  -7  -4    0.43    1.65
  -6  -7  -5    3.24    1.82
  -6  -7  -5    7.34    2.04
  -6  -7  -5    7.90    2.14
  -6  -7  -6   11.18    2.20
  -6  -7  -6   17.64    2.21
  -6  -7  -6   16.06    2.50
  -6  -7  -7    4.14    1.92
  -6  -7  -7    4.65    1.83
  -6  -7  -8   14.68    2.24
  -6  -7  -8   18.47    2.29
  -6  -7  -9    3.06    1.37
  -6  -8   3    4.09    1.38
   6   8  -3    4.51    1.13
   6   8  -2    5.25    1.30
  -6  -8   2    6.84    1.73
  -6  -8   2    3.81    1.15
  -6  -8   1    1.99    1.46
  -6  -8   0    2.69    1.77
  -6  -8   0    3.81    1.62
  -6  -8  -1   27.47    2.80
  -6  -8  -1   30.22    2.82
  -6  -8  -2   21.29    2.43
  -6  -8  -2   21.41    2.57
  -6  -8  -3   13.16    1.83
  -6  -8  -3   18.91    2.05
  -6  -8  -4   12.94    1.90
  -6  -8  -4   15.13    2.19
  -6  -8  -4   18.74    2.42
  -6  -8  -5    1.84    1.44
  -6  -8  -5    0.12    1.45
  -6  -8  -5   -0.91    1.70
  -6  -8  -6    0.44    1.37
  -6  -8  -6   -0.41    1.19
  -6  -8  -6    0.12    1.59
  -6  -8  -7    9.63    1.62
  -6  -8  -7   12.30    1.80
  -6  -9   0    0.78    1.07
  -6  -9  -1    4.91    1.35
  -6  -9  -2    0.96    1.26
  -6  -9  -2    3.39    1.45
  -6  -9  -3    8.93    1.61
  -6  -9  -4   51.42    3.04
  -6  -9  -4   61.41    3.17
  -6  -9  -5   -0.47    0.93
  -6  -9  -5    2.47    1.22
  -6  -9  -5    1.42    1.04
  -7   8   3    0.45    1.04
  -7   8   2   37.27    2.63
   7  -8  -1   17.95    1.84
  -7   8   1   11.63    1.66
  -7   8   0    3.66    1.27
  -7   8  -1    0.98    1.02
  -7   7   5    2.67    1.07
   7  -7  -5    2.17    0.99
   7  -7  -4   22.79    2.11
  -7   7   4   19.20    2.01
   7  -7  -3    7.80    1.77
  -7   7   3   10.27    1.85
  -7   7   2   11.49    2.04
   7  -7  -1   64.59    4.12
  -7   7   1   55.50    3.94
   7  -7   0    3.71    1.82
   7  -7   1   34.94    2.92
  -7   7  -1   34.06    2.88
  -7   7  -2   10.54    1.46
   7  -7   2   13.48    1.89
  -7   7  -2   10.73    1.80
  -7   7  -3    0.91    1.11
   7  -7   3    4.00    1.27
  -7   7  -3    3.33    1.19
  -7   7  -4   71.13    3.80
   7  -6  -7   20.99    2.00
   7  -6  -6    3.48    1.53
  -7   6   5   -0.33    1.32
   7  -6  -5   -0.73    1.47
   7  -6  -4   30.59    2.71
  -7   6   4   29.15    2.74
   7  -6  -3    3.18    1.81
  -7   6   3    2.79    1.92
   7  -6  -2    3.28    2.01
  -7   6   2    5.30    2.17
   7  -6  -1    0.51    2.04
  -7   6   1    3.90    2.19
   7  -6   0   48.57    3.94
   7  -6   1  150.44    7.73
  -7   6  -1  133.03    7.55
   7  -6   2   68.38    4.25
  -7   6  -2   60.65    4.07
  -7   6  -3    6.48    1.67
   7  -6   3   10.35    1.91
  -7   6  -3    4.63    1.70
   7  -6   4    1.61    1.26
  -7   6  -4    2.67    1.52
  -7   6  -5    3.09    1.45
  -7   6  -6   18.29    1.81
   7  -5  -8    0.61    1.22
   7  -5  -8    1.05    0.89
   7  -5  -7   61.86    3.46
   7  -5  -6   10.91    1.55
  -7   5   5    1.80    1.52
  -7   5   5   -0.40    1.50
   7  -5  -5    1.36    1.51
   7  -5  -5    1.54    1.14
   7  -5  -4  213.81   10.57
  -7   5   4  219.76   10.62
   7  -5  -3    2.24    1.94
  -7   5   3    2.24    2.08
   7  -5  -2   17.73    2.80
  -7   5   2   22.59    2.98
  -7   5   2   15.23    4.71
  -7   5   1    2.61    2.38
  -7   5   1    2.22    3.63
   7  -5   0    1.53    2.10
   7  -5   1  106.87    6.37
  -7   5  -1  107.83    6.37
  -7   5  -1   91.98    9.77
  -7   5  -2   89.32    5.15
   7  -5   2   88.55    5.62
  -7   5  -2   95.36    5.70
  -7   5  -3   23.29    2.52
   7  -5   3   26.53    2.76
  -7   5  -3   22.28    2.68
  -7   5  -4   79.01    4.78
  -7   5  -4   73.18    4.58
   7  -5   4   79.20    4.70
  -7   5  -5    6.40    1.94
  -7   5  -5    3.74    1.42
  -7   5  -6    5.00    1.68
  -7   5  -6    0.69    1.20
  -7   5  -7   15.09    1.83
  -7   5  -7   13.20    1.58
   7  -4  -8    2.18    1.18
   7  -4  -7   23.54    2.18
  -7   4   6   33.13    2.74
   7  -4  -6   26.84    2.43
  -7   4   5    5.67    1.78
  -7   4   5    4.94    1.95
   7  -4  -5    6.66    1.78
   7  -4  -5    4.60    1.46
  -7   4   4   74.79    4.75
   7  -4  -4   68.60    4.66
  -7   4   3   66.59    8.05
   7  -4  -3   70.71    4.85
  -7   4   3   71.81    4.92
   7  -4  -3   63.46    7.41
  -7   4   2   34.36    6.47
   7  -4  -2   46.32    3.85
  -7   4   2   45.22    3.96
   7  -4  -2   37.29    5.98
  -7   4   1   25.86    5.96
  -7   4   1   29.85    3.44
  -7   4   0   64.84    8.15
  -7   4   0   78.58    5.25
   7  -4   0   68.02    5.03
  -7   4  -1   69.27    8.42
   7  -4   1   86.83    5.55
  -7   4  -1   76.99    4.52
   7  -4   1   70.89    8.33
   7  -4   2   76.63    8.20
  -7   4  -2   71.59    8.25
  -7   4  -2   72.77    4.94
  -7   4  -2   66.88    4.40
   7  -4   2   70.91    4.97
  -7   4  -3    3.78    1.67
   7  -4   3    1.30    3.40
  -7   4  -3   -0.69    3.45
   7  -4   3    3.25    2.05
  -7   4  -3    2.93    2.10
  -7   4  -3    4.07    1.94
   7  -4   4   98.61    5.70
  -7   4  -4   89.57    5.40
  -7   4  -4  100.19    5.66
  -7   4  -4  100.52    5.73
   7  -4   5   20.66    2.22
  -7   4  -5   24.91    2.76
  -7   4  -5   21.12    2.28
  -7   4  -5   22.20    2.46
  -7   4  -6    5.58    1.70
  -7   4  -6    3.27    1.96
  -7   4  -7    1.56    1.47
  -7   4  -7    3.17    1.69
  -7   4  -8    4.51    1.36
  -7   4  -8    4.50    1.46
   7  -3  -9   12.05    1.61
   7  -3  -9    9.03    1.39
  -7   3   8    0.99    1.16
   7  -3  -8    2.25    1.39
  -7   3   7   38.47    2.90
  -7   3   6   19.67    2.48
   7  -3  -5    1.71    1.63
  -7   3   5    4.22    2.14
  -7   3   5    2.67    1.64
  -7   3   4   20.98    4.78
   7  -3  -4   20.88    2.70
  -7   3   4   23.12    2.76
   7  -3  -4   22.22    4.48
  -7   3   3   72.31    8.27
   7  -3  -3   72.46    5.07
  -7   3   3   72.13    4.91
  -7   3   2   83.62    9.32
   7  -3  -2   96.85    6.02
  -7   3   2   97.72    5.95
  -7   3   1    8.35    4.23
  -7   3   1   10.36    2.63
  -7   3   0    3.05    4.29
  -7   3   0    1.73    2.29
   7  -3   0    0.21    2.13
  -7   3  -1  236.44   11.31
   7  -3   1  259.75   12.40
  -7   3  -2  175.98    8.77
   7  -3   2  175.62    9.41
  -7   3  -2  179.88    8.76
  -7   3  -2  176.07    9.27
  -7   3  -2  174.50   13.39
  -7   3  -3   66.65    4.54
   7  -3   3   76.58    5.09
  -7   3  -3   64.79    4.45
  -7   3  -3   79.53    4.95
  -7   3  -3   68.39    8.16
  -7   3  -4   63.91    4.60
   7  -3   4   80.30    4.82
  -7   3  -4   68.66    4.61
  -7   3  -4   67.49    4.57
  -7   3  -4   73.47    7.93
  -7   3  -5    2.87    1.91
   7  -3   5    0.73    1.56
  -7   3  -5    1.29    2.19
  -7   3  -5    0.28    1.54
  -7   3  -6    9.94    2.33
  -7   3  -6   12.20    2.28
  -7   3  -7   20.98    2.58
  -7   3  -7   17.53    2.39
  -7   3  -8    8.59    1.95
  -7   3  -8    9.30    1.82
  -7   3  -9    1.33    1.22
   7  -2  -9    3.40    1.01
  -7   2   8    2.75    1.48
  -7   2   7  170.11    8.49
  -7   2   6  109.12    6.29
  -7   2   5   17.72    2.68
   7  -2  -5   19.10    2.41
  -7   2   4   11.49    2.60
   7  -2  -4   10.47    2.28
  -7   2   4    9.56    3.93
  -7   2   4   10.55    2.22
   7  -2  -3    4.04    2.08
  -7   2   3    6.95    4.02
  -7   2   3    9.00    2.29
   7  -2  -2   64.83    4.75
  -7   2   2   54.51    7.51
  -7   2   2   69.36    4.77
   7  -2  -1   12.81    2.82
  -7   2   1   17.86    4.86
  -7   2   1   16.93    2.76
   7  -2   0    5.42    2.11
  -7   2   0    9.77    4.62
  -7   2   0    8.69    2.41
   7  -2   1   42.02    3.84
  -7   2  -2   47.42    3.56
   7  -2   2   49.43    4.08
  -7   2  -2   56.34    4.20
  -7   2  -2   42.70    3.38
  -7   2  -3   53.95    3.90
   7  -2   3   54.16    4.19
  -7   2  -3   52.81    4.08
  -7   2  -3   51.01    4.61
  -7   2  -3   48.64    6.87
  -7   2  -4   30.52    3.16
   7  -2   4   26.80    3.04
  -7   2  -4   27.16    3.02
  -7   2  -4   34.86    3.23
  -7   2  -4   36.05    5.72
  -7   2  -5  152.41    7.74
   7  -2   5  138.56    7.40
  -7   2  -5  135.85    7.31
  -7   2  -5  119.36   10.22
  -7   2  -5  141.81    7.62
  -7   2  -6  187.00    9.54
  -7   2  -6  186.21    9.56
  -7   2  -7   23.74    2.87
  -7   2  -7   16.68    2.66
  -7   2  -7   26.72    2.93
  -7   2  -8   22.16    2.60
  -7   2  -8   19.90    2.50
  -7   2  -8   26.56    2.69
  -7   2  -9   26.02    2.43
  -7   2  -9   21.58    2.13
  -7   2 -10    8.44    1.36
   7  -1  -9    5.08    1.16
  -7   1   9    2.29    1.14
  -7   1   8    1.96    1.36
  -7   1   8    0.26    1.44
  -7   1   7  108.40    6.12
  -7   1   6   94.17    5.79
   7  -1  -5   26.47    2.61
  -7   1   5   23.52    3.13
  -7   1   4  174.24   12.99
  -7   1   4  179.75    9.51
   7  -1  -4  175.48    9.10
  -7   1   3   12.41    2.46
   7  -1  -3   16.32    2.57
  -7   1   3   17.75    2.76
  -7   1   3   13.42    4.43
  -7   1   2    0.70    3.67
  -7   1   2    7.20    2.30
   7  -1  -2    3.21    2.17
  -7   1   1  157.72   12.26
  -7   1   1  164.24    8.34
   7  -1  -1  140.70    8.35
  -7   1   0    2.17    3.79
   7  -1   0    2.26    2.16
  -7   1   0    1.29    2.14
   7  -1   1   25.96    3.13
  -7   1  -2   40.41    3.23
  -7   1  -2   44.37    3.82
  -7   1  -2   46.89    3.54
  -7   1  -2   34.84    6.29
   7  -1   2   49.70    4.02
  -7   1  -3    2.36    1.79
  -7   1  -3    3.34    1.96
  -7   1  -3    3.30    2.06
  -7   1  -3    2.07    3.88
   7  -1   3    5.33    2.13
  -7   1  -4   17.68    2.62
  -7   1  -4   17.77    2.52
   7  -1   4   20.72    2.70
  -7   1  -4   16.95    4.33
  -7   1  -4   20.03    2.70
  -7   1  -5   48.07    3.97
   7  -1   5   49.79    3.84
  -7   1  -5   57.23    4.13
  -7   1  -6  200.33   10.44
  -7   1  -6  213.78   10.46
  -7   1  -7   91.68    5.80
  -7   1  -7   99.73    5.88
  -7   1  -8    6.24    2.09
  -7   1  -8    2.23    2.10
  -7   1  -8    8.03    2.20
  -7   1  -9   27.46    2.76
  -7   1 -10    1.47    1.29
  -7   1 -10    1.42    1.38
   7   0  -9    5.83    1.21
  -7   0   9    3.97    1.20
  -7   0   8    0.25    1.36
  -7   0   8   -0.27    1.54
  -7   0   7   15.46    2.39
  -7   0   7   15.25    2.52
  -7   0   6    5.83    2.30
  -7   0   5   72.80    4.99
   7   0  -5   63.85    4.21
  -7   0   4  172.20    8.97
   7   0  -4  159.13    8.45
  -7   0   4  144.44   11.58
   7   0  -3   70.79    4.80
  -7   0   3   62.04    7.69
  -7   0   3   67.85    4.96
   7   0  -2  139.91    7.76
  -7   0   2  129.37   11.11
   7   0  -1  104.06    6.38
  -7   0   1   99.02    6.17
  -7   0   0  113.48   10.23
  -7   0   0  120.78    6.86
  -7   0  -1   75.97    5.17
  -7   0  -2    5.57    3.81
  -7   0  -2    4.29    2.03
   7   0   2    5.79    2.15
  -7   0  -2    4.29    1.65
  -7   0  -3    4.38    2.05
  -7   0  -3    2.17    1.91
   7   0   3    6.29    2.16
  -7   0  -3    5.56    2.02
  -7   0  -4  113.04   10.20
  -7   0  -4  128.87    6.99
   7   0   4  117.92    6.93
  -7   0  -4  118.50    6.70
   7   0   5   13.13    2.34
  -7   0  -5   10.30    2.42
  -7   0  -5   15.02    2.67
  -7   0  -6  121.42    6.91
  -7   0  -6  121.62    7.03
  -7   0  -7    5.70    2.31
  -7   0  -7    4.80    2.27
  -7   0  -7    4.49    1.89
  -7   0  -8   80.76    4.85
  -7   0  -8   89.49    5.32
  -7   0  -8   81.90    5.61
  -7   0  -9    6.84    1.90
  -7   0  -9    3.36    1.91
  -7   0 -10    0.97    1.60
  -7   0 -10    2.43    1.45
  -7  -1   8    0.81    1.53
  -7  -1   8    1.77    1.52
   7   1  -8    4.44    1.43
  -7  -1   7    3.22    1.96
  -7  -1   7    5.76    1.96
  -7  -1   6   32.24    3.40
  -7  -1   6   31.96    3.44
  -7  -1   5   13.36    2.63
  -7  -1   4  183.24    9.87
  -7  -1   4  195.07    9.34
   7   1  -4  177.63    9.42
   7   1  -3    0.38    1.79
  -7  -1   3    3.32    3.37
  -7  -1   2   60.89    7.52
   7   1  -2   44.62    7.11
  -7  -1   1  170.88    9.30
  -7  -1   1  201.96   13.95
   7   1  -1  180.94   13.80
  -7  -1   0  285.85   18.27
  -7  -1   0  285.27   13.65
   7   1   1    4.58    4.58
  -7  -1  -1    2.94    3.79
   7   1   2   11.44    5.10
  -7  -1  -2    7.28    4.33
  -7  -1  -3   68.71    4.44
   7   1   3   65.14    8.28
  -7  -1  -3   62.57    7.88
  -7  -1  -4  121.95   10.42
  -7  -1  -4  135.33    7.27
   7   1   4  115.09   10.86
  -7  -1  -4  122.30    6.89
  -7  -1  -5   18.16    2.76
  -7  -1  -5   19.27    2.71
  -7  -1  -5   11.78    3.99
  -7  -1  -5   16.67    2.39
   7   1   5   17.60    2.48
  -7  -1  -6   30.30    2.67
   7   1   6   28.64    2.83
  -7  -1  -6   21.47    3.06
  -7  -1  -6   26.98    2.83
  -7  -1  -7  545.14   24.52
  -7  -1  -7  569.49   24.51
  -7  -1  -7  532.45   24.18
  -7  -1  -8   13.44    2.47
  -7  -1  -8    9.71    2.10
  -7  -1  -9   12.13    2.03
  -7  -1  -9    8.44    2.28
  -7  -1 -10    2.14    1.82
  -7  -2   8    0.48    1.44
   7   2  -8    2.74    1.16
  -7  -2   8    2.13    1.46
  -7  -2   7    2.23    1.86
   7   2  -7    1.60    1.42
  -7  -2   7    1.12    1.75
  -7  -2   6    3.38    2.18
  -7  -2   6    3.71    2.08
  -7  -2   5    2.46    2.32
   7   2  -5    3.94    1.29
  -7  -2   4   59.85    4.02
   7   2  -4   58.57    3.41
   7   2  -4   54.52    4.18
   7   2  -3  152.61   12.06
  -7  -2   3  149.97    7.90
  -7  -2   3  133.88   11.02
  -7  -2   2   36.85    3.80
  -7  -2   2   39.84    6.36
  -7  -2   2   38.63    3.64
   7   2  -2   42.63    6.89
  -7  -2   1  163.93   13.19
   7   2  -1  197.70   14.35
  -7  -2   1  187.05    9.64
  -7  -2   0   63.54    8.05
   7   2   0   80.12    8.98
  -7  -2   0   71.89    4.79
   7   2   1  128.49   11.37
  -7  -2  -1  123.57   10.88
  -7  -2  -1  121.83    6.79
   7   2   2    2.29    4.18
  -7  -2  -2    8.74    1.96
   7   2   3   42.91    7.27
  -7  -2  -3   55.84    3.87
  -7  -2  -3   54.19    7.23
  -7  -2  -3   53.96    3.63
  -7  -2  -4   42.95    3.56
  -7  -2  -4   36.16    5.73
   7   2   4   44.26    6.94
  -7  -2  -4   35.99    3.23
  -7  -2  -5   32.86    3.08
  -7  -2  -5   28.35    5.09
  -7  -2  -5   30.29    2.95
   7   2   5   26.18    5.84
  -7  -2  -5   28.31    5.38
  -7  -2  -6   43.35    5.57
  -7  -2  -6   38.26    6.18
   7   2   6   43.68    3.51
  -7  -2  -6   43.87    3.41
  -7  -2  -6   51.10    4.07
  -7  -2  -6   50.27    3.89
  -7  -2  -7   -0.17    1.97
  -7  -2  -7    3.11    2.08
  -7  -2  -8  103.21    6.45
  -7  -2  -8  121.12    7.02
  -7  -2  -8  115.22    6.45
  -7  -2  -9   14.40    2.65
  -7  -2 -10    2.01    1.15
  -7  -2 -10    1.08    1.82
   7   3  -8    9.93    1.27
  -7  -3   8   13.58    1.66
  -7  -3   7    4.51    1.78
   7   3  -7    3.99    1.31
  -7  -3   7    5.96    1.88
   7   3  -6    3.94    1.26
  -7  -3   6    5.49    2.02
   7   3  -6    2.12    1.40
  -7  -3   6    3.91    1.41
  -7  -3   5   28.58    3.22
   7   3  -5   21.54    2.04
  -7  -3   5   22.21    2.93
   7   3  -4   12.78    1.69
  -7  -3   4   14.74    2.73
  -7  -3   4   11.91    2.02
  -7  -3   3   11.49    3.92
  -7  -3   3   13.08    2.34
   7   3  -3   14.83    1.81
  -7  -3   3   12.41    2.67
  -7  -3   3   16.36    2.73
   7   3  -3   23.21    5.16
  -7  -3   2   28.68    5.48
   7   3  -2   36.09    2.53
  -7  -3   2   38.31    3.43
  -7  -3   2   35.22    3.53
   7   3  -1  192.14   13.97
  -7  -3   1  164.16   12.78
  -7  -3   1  167.28    9.04
  -7  -3   1  174.95    9.08
  -7  -3   0   21.75    2.96
  -7  -3   0   13.72    4.55
  -7  -3   0   20.31    2.68
   7   3   0   15.68    5.14
  -7  -3  -1   10.44    2.56
  -7  -3  -1    9.44    4.32
  -7  -3  -1    9.50    2.13
  -7  -3  -2   18.58    2.25
   7   3   2   21.03    5.81
  -7  -3  -3   36.14    3.54
  -7  -3  -3   38.03    3.28
  -7  -3  -3   34.38    5.89
   7   3   3   38.25    6.62
  -7  -3  -4   75.68    8.24
  -7  -3  -4   72.66    7.80
  -7  -3  -4   92.84    5.50
  -7  -3  -4   92.71    5.56
   7   3   4   74.19    8.86
   7   3   5   39.38    6.53
  -7  -3  -5   47.19    3.64
  -7  -3  -5   40.61    6.00
  -7  -3  -5   50.62    3.89
  -7  -3  -5   31.36    5.47
  -7  -3  -6    3.08    1.68
  -7  -3  -6    0.70    3.18
  -7  -3  -6    0.52    2.07
  -7  -3  -6    4.18    2.37
  -7  -3  -6    3.23    2.82
  -7  -3  -7    3.63    2.12
  -7  -3  -7    4.17    2.15
  -7  -3  -8   11.88    2.33
  -7  -3  -8    8.98    2.52
  -7  -3  -8   10.38    2.34
  -7  -3 -10   -0.83    1.36
  -7  -4   7   18.65    2.07
  -7  -4   6    2.49    1.82
   7   4  -6    2.78    1.11
   7   4  -6    0.28    1.07
  -7  -4   5   24.82    2.55
   7   4  -5   29.30    2.22
  -7  -4   5   28.40    2.96
   7   4  -5   26.69    2.20
  -7  -4   4   35.98    3.36
   7   4  -4   33.47    2.56
  -7  -4   4   36.30    3.55
  -7  -4   3   17.81    2.59
  -7  -4   3   19.58    3.00
   7   4  -3   16.36    1.93
   7   4  -2   47.02    3.10
  -7  -4   2   48.20    3.89
  -7  -4   2   46.60    6.38
  -7  -4   2   44.61    3.98
  -7  -4   2   49.75    3.85
  -7  -4   1   40.03    3.37
  -7  -4   1   46.19    3.86
  -7  -4   1   32.74    5.96
   7   4  -1   47.64    7.02
  -7  -4   1   39.19    3.58
  -7  -4   0   74.88    4.70
  -7  -4   0   80.57    5.38
  -7  -4   0   81.23    8.61
   7   4   0   88.36    9.62
  -7  -4   0   80.14    5.07
  -7  -4  -1    9.68    2.00
  -7  -4  -1   10.06    4.28
  -7  -4  -1   16.47    2.70
   7   4   2   21.98    5.75
  -7  -4  -2   14.83    2.04
   7   4   3    7.74    4.69
  -7  -4  -3    2.66    2.08
  -7  -4  -3   -1.39    3.21
  -7  -4  -4   39.53    3.85
   7   4   4   50.81    7.30
  -7  -4  -4   42.08    3.61
  -7  -4  -4   42.25    3.70
  -7  -4  -5  227.77   10.75
  -7  -4  -5  202.13   14.00
  -7  -4  -5  212.29   10.52
  -7  -4  -6    3.84    2.21
  -7  -4  -6    3.52    2.31
  -7  -4  -7   -0.39    2.23
  -7  -4  -7    3.54    2.13
  -7  -4  -8    7.20    2.20
  -7  -4  -8    7.95    2.28
  -7  -4  -8    9.50    2.37
  -7  -4  -9   16.05    2.28
  -7  -4  -9   20.71    2.52
  -7  -4  -9   19.13    2.52
  -7  -4 -10    2.37    1.49
  -7  -4 -10    1.40    1.27
   7   5  -6   11.28    1.24
   7   5  -5    3.34    1.19
  -7  -5   5    1.35    1.71
  -7  -5   5    1.19    1.31
   7   5  -4   58.20    3.36
  -7  -5   4   54.45    3.92
  -7  -5   4   52.33    4.05
  -7  -5   3    7.81    2.28
  -7  -5   3    9.90    1.78
   7   5  -3   10.45    1.66
  -7  -5   3    6.89    1.96
  -7  -5   2    3.02    2.02
  -7  -5   2    1.32    1.65
  -7  -5   2    3.06    1.71
   7   5  -2    4.52    1.57
  -7  -5   1  240.99   11.56
  -7  -5   1  235.13   11.10
  -7  -5   1  229.83   11.50
  -7  -5   0   21.29    2.45
  -7  -5   0   16.36    2.40
  -7  -5   0   15.42    2.62
  -7  -5   0   15.68    4.77
  -7  -5  -1   80.41    8.84
  -7  -5  -1  105.46    5.79
  -7  -5  -1   89.67    5.23
  -7  -5  -1   87.71    5.90
  -7  -5  -2   20.80    3.06
  -7  -5  -2   21.88    2.76
   7   5   2   19.36    5.70
  -7  -5  -3    2.85    2.21
  -7  -5  -3    4.09    2.34
  -7  -5  -3    4.10    3.52
  -7  -5  -4   69.38    4.89
  -7  -5  -4   66.80    4.68
  -7  -5  -5    6.01    2.26
  -7  -5  -5    6.00    2.41
  -7  -5  -5    5.46    1.96
  -7  -5  -6   35.56    3.35
  -7  -5  -6   27.91    2.68
  -7  -5  -7    2.42    1.80
  -7  -5  -7    3.44    2.03
  -7  -5  -8    6.96    1.88
  -7  -5  -8    9.43    2.11
  -7  -5  -9   18.19    2.23
  -7  -5  -9   18.34    2.09
  -7  -5  -9   21.75    2.31
  -7  -6   4    7.23    1.74
  -7  -6   4    7.26    1.60
   7   6  -4    5.55    1.20
  -7  -6   3    4.82    1.81
   7   6  -3    9.32    1.44
  -7  -6   3    7.57    1.99
  -7  -6   2   19.44    2.50
  -7  -6   2   26.06    2.81
  -7  -6   2   22.74    2.31
   7   6  -2   23.01    2.11
  -7  -6   1   13.42    2.16
  -7  -6   1   15.83    2.28
  -7  -6   0  122.55    6.83
  -7  -6  -1   17.67    2.58
  -7  -6  -2   34.29    3.34
  -7  -6  -3    2.82    1.81
  -7  -6  -4    2.54    1.77
  -7  -6  -4    1.16    1.49
  -7  -6  -4    3.98    1.98
  -7  -6  -4    4.41    2.17
  -7  -6  -5    7.14    2.07
  -7  -6  -5    3.72    1.68
  -7  -6  -5    5.50    2.15
  -7  -6  -6    2.35    1.93
  -7  -6  -6    1.32    1.46
  -7  -6  -6    1.04    1.89
  -7  -6  -7    7.18    1.98
  -7  -6  -7    4.98    1.90
  -7  -6  -8    2.95    1.69
  -7  -6  -9   23.74    2.11
  -7  -6  -9   22.73    2.15
   7   7  -3    0.99    0.91
  -7  -7   3    1.51    1.23
   7   7  -2    0.75    1.00
  -7  -7   2   -1.60    1.09
  -7  -7   2    1.42    1.50
   7   7  -1   17.05    1.71
  -7  -7   1   16.43    1.94
  -7  -7   0    1.86    1.53
  -7  -7   0    2.07    1.67
  -7  -7  -1   17.29    2.21
  -7  -7  -1   13.04    2.12
  -7  -7  -2   57.34    3.97
  -7  -7  -2   57.41    3.83
  -7  -7  -3   14.33    2.04
  -7  -7  -3   22.16    2.61
  -7  -7  -4   12.80    2.05
  -7  -7  -4   17.70    2.38
  -7  -7  -5    1.38    1.49
  -7  -7  -5    0.95    1.40
  -7  -7  -5    1.44    1.78
  -7  -7  -6    4.15    1.55
  -7  -7  -6    1.43    1.16
  -7  -7  -6    2.89    1.66
  -7  -7  -7   39.87    2.77
  -7  -7  -7   28.51    2.57
  -7  -8   0    1.36    1.09
  -7  -8   0    0.72    1.14
   7   8   0    1.67    0.92
  -7  -8  -1    2.28    1.26
  -7  -8  -1    4.38    1.30
  -7  -8  -2    8.90    1.68
  -7  -8  -2    5.88    1.47
  -7  -8  -2    4.58    1.26
  -7  -8  -3   16.82    2.04
  -7  -8  -4   15.29    1.75
  -7  -8  -5    0.93    1.00
  -8   7   1   13.71    1.60
   8  -7  -1   17.20    1.71
   8  -7   0    6.37    1.35
   8  -6  -4    7.11    1.07
  -8   6   4    7.74    1.32
  -8   6   4    8.74    1.29
  -8   6   3    3.31    1.32
   8  -6  -3    4.04    1.41
  -8   6   2    3.95    1.51
   8  -6  -2    4.58    1.57
  -8   6   1   35.51    2.84
   8  -6  -1   38.77    3.03
   8  -6   0    4.11    1.65
  -8   6  -1    1.31    1.47
   8  -6   1    0.83    1.44
  -8   6  -2   14.78    1.83
   8  -6   2   18.74    1.96
  -8   6  -3   15.02    1.69
   8  -6   3   20.97    1.83
   8  -5  -6   34.55    2.45
  -8   5   5   57.13    3.38
  -8   5   4    1.86    1.36
   8  -5  -4    0.97    1.29
  -8   5   4    2.15    1.42
  -8   5   3   55.27    3.84
   8  -5  -3   62.13    3.91
  -8   5   2    2.62    1.76
   8  -5  -2    3.50    1.85
  -8   5   1   50.43    3.75
  -8   5   0    1.69    1.84
   8  -5   0    0.62    1.85
  -8   5  -1   19.69    2.40
   8  -5   1   15.67    2.40
  -8   5  -2   48.14    3.52
   8  -5   2   49.69    3.56
  -8   5  -3    4.58    1.53
  -8   5  -3    4.15    1.33
   8  -5   3    4.65    1.58
  -8   5  -4   31.94    2.40
   8  -5   4   36.00    2.49
  -8   5  -5   13.00    1.56
  -8   4   6   39.27    2.62
  -8   4   5    1.94    1.46
  -8   4   4  139.94    7.41
   8  -4  -4  151.27    7.50
  -8   4   4  154.76    7.74
  -8   4   3    5.22    1.83
   8  -4  -3    2.28    1.84
  -8   4   2   76.01    4.96
   8  -4  -2   82.17    5.17
  -8   4   1   15.24    2.50
  -8   4   0   35.02    3.47
   8  -4   0   42.29    3.55
   8  -4   1   79.20    5.21
  -8   4  -2    6.77    2.22
   8  -4   2    5.81    2.05
  -8   4  -3   18.38    2.39
  -8   4  -3   15.35    1.98
   8  -4   3   19.49    2.44
  -8   4  -4    5.78    1.71
   8  -4   4    8.35    1.76
  -8   4  -4    6.65    1.70
  -8   4  -5    3.15    1.51
  -8   4  -5    2.11    1.18
  -8   4  -6    3.84    1.38
  -8   4  -6    4.26    1.21
  -8   4  -7   44.38    2.76
  -8   3   7    3.48    1.16
   8  -3  -7    1.96    0.88
   8  -3  -6   11.59    1.42
  -8   3   6   18.77    1.96
  -8   3   5    3.58    1.75
   8  -3  -4    0.84    1.59
  -8   3   4    2.31    1.92
  -8   3   4    1.63    1.55
   8  -3  -3  160.62    8.41
  -8   3   3  159.87    8.55
  -8   3   3  161.94    8.36
   8  -3  -2   85.15    5.50
  -8   3   2   85.82    5.43
  -8   3   1   38.58    3.61
  -8   3   0  114.54    6.64
   8  -3   0  114.61    6.79
  -8   3   0  102.71   10.11
   8  -3   1  126.50    7.26
  -8   3  -1  120.60   10.89
  -8   3  -2  270.44   13.05
   8  -3   2  271.90   13.16
  -8   3  -3    0.49    1.87
   8  -3   3    0.51    1.81
  -8   3  -3    3.81    1.69
  -8   3  -4    5.98    1.83
   8  -3   4   12.20    2.13
  -8   3  -4    9.00    1.92
  -8   3  -4    9.72    1.79
   8  -3   5    1.59    1.28
  -8   3  -5    1.53    1.74
  -8   3  -5    3.67    1.54
  -8   3  -6    0.24    1.53
  -8   3  -6    1.71    1.42
  -8   3  -7    2.39    1.42
  -8   3  -7    1.29    1.25
  -8   3  -8    7.13    1.31
  -8   3  -8    8.35    1.29
  -8   2   7   22.53    2.26
   8  -2  -7   28.19    2.01
  -8   2   7   29.89    2.26
  -8   2   6   24.59    2.48
  -8   2   5    1.74    1.74
   8  -2  -4   32.71    2.94
  -8   2   4   34.40    3.28
   8  -2  -3    2.44    1.98
  -8   2   3    4.18    2.29
  -8   2   3    4.36    2.05
  -8   2   2   19.54    4.87
   8  -2  -2   22.99    2.94
  -8   2   2   21.38    2.86
  -8   2   1   18.69    2.79
  -8   2   1   18.99    4.98
  -8   2   0    5.95    4.14
   8  -2   0    5.09    2.57
  -8   2   0    9.62    2.54
   8  -2   1   72.24    5.04
  -8   2  -2  187.46   13.92
  -8   2  -2  195.39    9.89
   8  -2   2  184.93    9.87
  -8   2  -3   25.85    5.16
   8  -2   3   32.28    3.32
  -8   2  -3   35.23    3.28
  -8   2  -3   31.87    2.84
  -8   2  -4   52.91    3.83
  -8   2  -4   48.02    3.64
  -8   2  -4   54.06    3.79
   8  -2   4   54.89    3.90
  -8   2  -5   50.24    3.74
  -8   2  -5   54.39    3.80
   8  -2   5   54.17    3.68
  -8   2  -6    1.50    1.69
  -8   2  -6    1.87    1.79
  -8   2  -7    7.36    1.71
  -8   2  -7   10.69    1.90
  -8   2  -7    7.45    1.72
  -8   2  -8    2.01    1.36
  -8   2  -8    2.35    1.29
  -8   2  -8    1.33    1.09
  -8   1   7    6.55    1.57
  -8   1   7    8.38    1.54
  -8   1   6   85.08    5.08
  -8   1   5    3.71    2.06
  -8   1   4   62.86    4.65
   8  -1  -4   67.85    4.39
  -8   1   3   59.45    4.63
   8  -1  -3   65.26    4.54
  -8   1   2   11.71    2.79
  -8   1   2   10.98    4.37
   8  -1  -2   16.75    2.58
  -8   1   1   43.97    3.75
   8  -1  -1   38.86    3.79
  -8   1   0   24.96    3.17
   8  -1   1   39.75    3.84
  -8   1  -2  279.22   13.45
   8  -1   2  277.13   13.54
   8  -1   3   18.82    2.75
  -8   1  -3   17.02    2.27
   8  -1   4   29.74    3.15
  -8   1  -4   30.15    5.58
  -8   1  -4   31.46    2.92
  -8   1  -5   84.89    5.17
   8  -1   5   88.42    5.11
  -8   1  -5   76.17    5.01
  -8   1  -6   16.48    2.44
  -8   1  -6   12.24    2.00
  -8   1  -6   14.96    2.31
  -8   1  -7   22.41    2.56
  -8   1  -7   23.28    2.53
  -8   1  -8   15.10    2.15
  -8   1  -8   16.29    2.07
  -8   1  -8   20.11    2.10
  -8   1  -9    7.02    1.32
  -8   0   7   21.61    2.16
  -8   0   7   20.57    2.17
  -8   0   6   41.77    3.37
  -8   0   6   46.59    3.50
  -8   0   5   12.07    2.36
   8   0  -4   30.05    2.83
  -8   0   4   36.56    3.43
  -8   0   4   27.84    2.73
  -8   0   3  103.33    6.30
   8   0  -3   96.71    6.00
   8   0  -2   94.08    5.77
  -8   0   2   69.46    8.47
  -8   0   1   32.00    3.38
   8   0  -1   33.31    3.53
  -8   0   1   26.40    5.64
  -8   0   0    5.71    2.20
  -8   0   0    4.64    4.05
   8   0   1   19.17    2.92
   8   0   2   11.33    2.53
  -8   0  -2    9.92    4.26
   8   0   3   49.24    4.22
  -8   0  -3   58.59    7.28
   8   0   4   29.90    3.07
  -8   0  -4   32.44    5.51
  -8   0  -4   20.37    2.53
  -8   0  -5   21.37    2.60
   8   0   5   25.66    2.78
  -8   0  -6   72.05    4.30
  -8   0  -6   75.42    4.82
  -8   0  -6   77.05    4.76
  -8   0  -7    4.89    1.71
  -8   0  -7    7.02    1.99
  -8   0  -8    2.19    1.88
  -8   0  -9    3.41    1.52
  -8  -1   7   41.85    2.89
  -8  -1   7   39.09    2.88
   8   1  -7   37.61    2.53
  -8  -1   6  114.45    6.16
  -8  -1   6  106.23    6.05
  -8  -1   5    2.05    1.94
  -8  -1   4    1.44    1.44
  -8  -1   4    5.78    2.14
   8   1  -4    3.15    1.73
  -8  -1   3   14.74    2.27
   8   1  -3   12.47    2.40
  -8  -1   2    5.44    2.22
  -8  -1   2   -1.37    3.58
   8   1  -2    5.55    2.27
  -8  -1   1   38.95    3.54
   8   1  -1   32.98    3.60
  -8  -1   0   51.23    7.49
  -8  -1   0   71.98    4.80
  -8  -1  -1   15.25    2.48
  -8  -1  -1    4.56    4.00
   8   1   1    9.01    2.47
  -8  -1  -2   52.49    3.87
  -8  -1  -2   57.71    7.57
   8   1   2   48.52    4.22
  -8  -1  -3    1.42    1.52
  -8  -1  -3   -2.16    3.58
   8   1   3    3.31    2.06
  -8  -1  -4    1.34    3.21
   8   1   4    2.38    1.92
   8   1   5   45.91    3.61
  -8  -1  -5   44.33    3.50
   8   1   6   96.38    5.38
  -8  -1  -6   97.14    5.91
  -8  -1  -6   96.33    5.27
  -8  -1  -7   44.99    3.54
  -8  -1  -8    5.34    1.60
  -8  -1  -8    5.46    2.13
  -8  -1  -9    9.13    1.89
  -8  -2   6   12.75    1.99
  -8  -2   5   10.09    2.15
  -8  -2   5    6.17    2.00
  -8  -2   4   63.21    4.44
  -8  -2   3   19.90    2.41
  -8  -2   3   17.57    2.77
   8   2  -3   16.90    2.54
  -8  -2   2   31.59    3.15
   8   2  -2   30.69    3.29
  -8  -2   2   31.30    3.34
  -8  -2   1   82.23    5.18
  -8  -2   1   67.27    8.14
  -8  -2   1   70.25    4.97
   8   2   0   18.70    5.41
  -8  -2   0   10.24    2.44
  -8  -2   0   10.58    2.32
  -8  -2   0    7.94    4.14
  -8  -2  -1    2.30    2.19
  -8  -2  -1    1.31    1.80
  -8  -2  -1   -1.47    3.65
   8   2   2   68.24    8.38
  -8  -2  -2   63.77    4.21
   8   2   3   39.37    6.71
  -8  -2  -3   40.92    3.53
  -8  -2  -3   31.53    5.75
  -8  -2  -3   37.16    2.88
  -8  -2  -4   11.13    3.96
  -8  -2  -4   12.37    2.03
  -8  -2  -4   14.26    2.40
  -8  -2  -5   13.79    2.15
   8   2   5   14.33    2.34
  -8  -2  -5   20.84    2.46
  -8  -2  -6   41.35    3.19
  -8  -2  -6   43.13    3.81
   8   2   6   40.77    3.17
  -8  -2  -6   47.46    3.19
  -8  -2  -7    9.73    1.84
  -8  -2  -7   11.52    2.29
  -8  -2  -8    4.81    1.73
  -8  -2  -8    6.22    2.01
  -8  -2  -9    5.79    1.36
  -8  -2  -9    9.82    1.92
  -8  -3   6    4.70    1.41
  -8  -3   6    5.03    1.52
   8   3  -6    5.58    1.09
  -8  -3   5   11.83    2.00
  -8  -3   4   25.96    2.69
  -8  -3   4   26.24    2.88
  -8  -3   3   12.20    2.21
   8   3  -3    8.62    1.96
  -8  -3   3    9.98    1.89
  -8  -3   3   11.24    2.47
  -8  -3   2    2.40    1.92
  -8  -3   2    2.87    1.76
  -8  -3   2    1.25    2.06
  -8  -3   1   24.15    2.90
  -8  -3   1   19.61    2.53
  -8  -3   1   26.45    2.93
  -8  -3   0   35.53    3.24
  -8  -3   0   36.74    3.52
  -8  -3  -1    9.86    4.18
  -8  -3  -1   10.50    2.53
  -8  -3  -1    8.78    1.97
  -8  -3  -1    5.06    1.77
  -8  -3  -2    1.72    1.46
  -8  -3  -2    4.29    1.73
  -8  -3  -3    1.10    1.64
  -8  -3  -3    1.44    1.92
  -8  -3  -4   55.78    3.93
  -8  -3  -4   59.84    4.26
  -8  -3  -5  120.16    6.78
  -8  -3  -5  102.84    6.01
  -8  -3  -5  112.00    6.18
   8   3   6    3.24    1.56
  -8  -3  -6    1.20    1.61
  -8  -3  -6    2.18    2.07
  -8  -3  -6    0.50    1.44
  -8  -3  -7   28.21    2.67
  -8  -3  -7   31.39    3.02
  -8  -3  -8   31.82    2.98
  -8  -3  -8   27.47    2.68
  -8  -3  -9    4.73    1.34
  -8  -4   5    8.31    1.38
  -8  -4   5    9.74    1.75
  -8  -4   4   35.45    2.94
  -8  -4   4   24.99    2.48
  -8  -4   3   49.29    3.54
  -8  -4   3   49.49    3.79
  -8  -4   3   54.92    3.33
  -8  -4   2    1.11    1.76
  -8  -4   2    3.30    1.60
  -8  -4   1   42.03    3.43
  -8  -4   1   37.11    2.96
  -8  -4   1   44.41    3.56
  -8  -4   0    2.44    1.99
  -8  -4   0    2.49    1.73
  -8  -4  -1    1.08    1.92
  -8  -4  -1    1.69    1.51
  -8  -4  -2    2.25    1.81
  -8  -4  -3   -0.70    1.89
  -8  -4  -3    1.28    1.75
  -8  -4  -3    2.27    2.14
  -8  -4  -4   53.23    4.06
  -8  -4  -4   58.10    4.50
  -8  -4  -4   60.69    3.99
  -8  -4  -5    6.37    1.99
  -8  -4  -5    3.49    1.66
  -8  -4  -6    2.89    1.78
  -8  -4  -6    2.39    1.99
   8   4   6    0.24    1.38
  -8  -4  -6    3.92    1.40
  -8  -4  -7   88.72    5.36
  -8  -4  -7   92.78    5.38
  -8  -4  -7   91.43    5.11
  -8  -4  -8   20.74    2.32
  -8  -4  -8   25.43    2.25
  -8  -5   4   11.71    1.68
  -8  -5   4   12.75    1.58
  -8  -5   3   37.09    2.87
  -8  -5   3   36.34    2.87
  -8  -5   2   53.61    3.73
  -8  -5   2   60.49    3.60
  -8  -5   1   17.22    2.21
  -8  -5   1   23.87    2.35
  -8  -5   0  107.61    6.03
  -8  -5  -1    8.28    2.02
  -8  -5  -2    8.45    2.03
  -8  -5  -2    6.25    1.93
  -8  -5  -2    8.06    2.11
  -8  -5  -3    1.50    1.76
  -8  -5  -3    3.70    1.95
  -8  -5  -3    1.96    1.71
  -8  -5  -4    5.38    1.87
  -8  -5  -4    0.82    1.85
  -8  -5  -4    3.51    1.73
  -8  -5  -5   12.96    2.13
  -8  -5  -5   13.26    2.30
  -8  -5  -5   10.36    1.82
  -8  -5  -6    0.97    1.65
  -8  -5  -6    1.67    1.17
  -8  -5  -7    7.94    1.65
  -8  -5  -8   14.94    1.85
  -8  -5  -8   14.54    1.68
  -8  -6   2    7.88    1.52
  -8  -6   1   14.15    1.73
  -8  -6   0    3.67    1.47
  -8  -6   0    5.32    1.72
  -8  -6  -1   51.38    3.47
  -8  -6  -1   48.65    3.49
  -8  -6  -2   12.57    1.91
  -8  -6  -2   14.02    2.02
  -8  -6  -2   11.14    1.91
  -8  -6  -3    4.92    1.71
  -8  -6  -3    3.73    1.42
  -8  -6  -4    4.32    1.71
  -8  -6  -4    1.49    1.51
  -8  -6  -4   -0.12    1.42
  -8  -6  -5    5.54    1.63
  -8  -6  -5    4.09    1.32
  -8  -6  -5    6.89    1.67
  -8  -6  -6    7.37    1.63
  -8  -6  -6    9.37    1.73
  -8  -7  -1    5.75    1.38
  -8  -7  -1    5.07    1.26
  -8  -7  -1    4.86    1.26
  -8  -7  -2    3.14    1.36
  -8  -7  -2    5.73    1.32
  -8  -7  -2    4.04    1.19
  -8  -7  -3    5.56    1.45
  -8  -7  -4   16.12    1.68
  -8  -7  -4   19.51    1.89
  -9   5   2    2.78    1.16
  -9   5   2    1.59    1.11
   9  -5  -2    1.22    1.17
  -9   5   1   10.33    1.51
  -9   5   0    3.19    1.28
   9  -5   0    3.52    1.31
  -9   5  -1    2.96    1.21
   9  -5   1    4.84    1.27
  -9   5  -2   12.11    1.45
   9  -5   2   12.41    1.50
  -9   4   4    6.24    1.31
  -9   4   3   20.06    2.04
   9  -4  -3   21.18    1.97
  -9   4   2   20.26    2.19
  -9   4   2   20.51    2.10
   9  -4  -2   22.84    2.20
  -9   4   1   22.87    2.30
  -9   4   0   42.23    3.09
   9  -4   0   42.60    3.19
   9  -4   1    3.74    1.66
  -9   4  -2    6.93    1.57
   9  -4   2    7.18    1.60
   9  -4   3    8.09    1.45
   9  -4   4    1.63    0.89
  -9   3   5   34.89    2.43
  -9   3   4    2.02    1.40
  -9   3   3    2.72    1.56
   9  -3  -3    2.88    1.37
  -9   3   2   13.04    2.15
   9  -3  -2   16.70    2.12
  -9   3   1   40.89    3.30
  -9   3   1   50.28    3.61
  -9   3   0   40.37    3.28
   9  -3   0   44.39    3.41
   9  -3   1   -1.00    1.64
   9  -3   2   26.32    2.58
   9  -3   3   94.25    5.17
   9  -3   4    3.83    1.29
  -9   2   5   24.71    2.19
  -9   2   4    6.98    1.64
   9  -2  -3    4.51    1.68
  -9   2   3    6.55    1.83
   9  -2  -2    1.00    1.74
  -9   2   2    0.15    1.74
   9  -2  -1    3.26    1.90
   9  -2   0    9.34    2.16
  -9   2   0   12.46    2.18
   9  -2   1    8.91    2.19
   9  -2   2   31.63    2.91
   9  -2   3   19.42    2.36
   9  -2   4   17.87    2.04
   9  -2   5   10.28    1.45
  -9   2  -6    3.44    1.18
  -9   1   5   28.57    2.42
  -9   1   4    4.87    1.72
  -9   1   3   65.94    4.35
   9  -1  -3   67.41    4.15
   9  -1  -2    8.84    2.06
  -9   1   1    4.07    1.92
   9  -1  -1    2.94    2.03
  -9   1   0    9.89    2.21
  -9   1  -1   70.33    4.67
   9  -1   1   72.28    4.81
  -9   1  -2    8.43    1.93
   9  -1   2    8.65    2.15
  -9   1  -3   12.31    1.94
   9  -1   3    9.93    2.10
   9  -1   4    2.34    1.52
  -9   1  -5   17.07    1.99
  -9   1  -5   14.82    1.71
   9  -1   5   13.88    1.75
  -9   1  -6   50.81    3.03
  -9   1  -7    4.52    1.30
  -9   0   5    5.85    1.54
  -9   0   5    6.96    1.53
  -9   0   4   10.69    1.95
   9   0  -3   35.70    2.88
  -9   0   3   32.55    2.68
   9   0  -2    0.76    1.71
  -9   0   2    3.04    1.83
  -9   0   2    4.72    1.76
   9   0  -1    3.97    2.10
  -9   0   1    4.53    2.01
  -9   0   0  257.28   12.29
   9   0   1   12.65    2.53
  -9   0  -1   15.95    2.32
   9   0   2   64.71    4.50
  -9   0  -2   63.65    4.18
   9   0   3    0.79    1.79
  -9   0  -3    1.92    1.42
   9   0   4   19.21    2.37
  -9   0  -4   16.04    2.16
   9   0   5   62.32    3.85
  -9   0  -5   67.66    3.91
  -9   0  -6   24.37    2.29
  -9   0  -7   39.50    2.79
  -9   0  -7   29.96    2.22
  -9  -1   5    8.08    1.52
  -9  -1   5   12.10    1.70
  -9  -1   4    1.88    1.47
   9   1  -3   27.62    2.53
  -9  -1   3   30.52    2.47
   9   1  -2    6.14    1.95
  -9  -1   2    2.01    1.72
  -9  -1   2    0.41    1.52
   9   1  -1    4.86    2.02
  -9  -1   1    2.81    1.88
  -9  -1   1    1.84    1.75
  -9  -1   0    1.53    1.77
  -9  -1   0    4.24    1.96
   9   1   1  104.72    6.11
  -9  -1  -1   99.28    5.72
  -9  -1  -1  103.57    6.04
   9   1   2  169.73    8.88
  -9  -1  -2  174.59    8.47
   9   1   3   44.14    3.56
  -9  -1  -3   44.20    3.53
   9   1   4    1.42    1.69
  -9  -1  -4    1.81    1.56
   9   1   5    0.47    1.49
  -9  -1  -5    1.73    1.41
  -9  -1  -5    1.51    1.67
  -9  -1  -6   20.61    2.25
  -9  -1  -7   32.11    2.77
  -9  -1  -7   29.32    2.31
  -9  -2   4   -0.11    1.27
  -9  -2   3   20.14    2.18
  -9  -2   3   20.61    1.98
  -9  -2   3   22.16    2.40
  -9  -2   2   21.32    2.47
  -9  -2   2   19.93    2.26
   9   2  -2   23.59    2.49
  -9  -2   2   18.01    2.16
   9   2  -1    5.04    1.92
  -9  -2   1    1.74    1.68
  -9  -2   1    1.87    1.63
  -9  -2   0    3.22    1.62
  -9  -2   0    1.24    1.65
   9   2   1   10.08    2.29
  -9  -2  -1    8.00    1.79
  -9  -2  -1   11.66    2.14
   9   2   2   52.17    3.97
  -9  -2  -3   30.19    2.86
   9   2   3   27.86    2.91
  -9  -2  -4   46.85    3.37
   9   2   4   43.35    3.34
  -9  -2  -5   55.64    3.84
  -9  -2  -5   46.11    3.22
   9   2   5   45.91    3.23
   9   2   6    1.91    1.07
  -9  -2  -6   -0.67    1.61
  -9  -2  -7    2.59    1.32
  -9  -2  -7    0.76    1.56
  -9  -3   3    4.07    1.48
  -9  -3   3    0.39    1.11
  -9  -3   2   78.13    4.71
  -9  -3   2   82.48    4.60
   9   3  -2   88.19    4.78
  -9  -3   1   17.77    2.16
  -9  -3   1   17.62    2.18
   9   3  -1   20.87    2.35
  -9  -3   0   26.46    2.52
   9   3   0   30.83    3.00
   9   3   1    4.61    1.90
  -9  -3  -1    5.07    1.87
   9   3   2    9.42    2.12
   9   3   3   33.38    2.94
  -9  -3  -3   29.81    2.86
   9   3   4    3.92    1.65
  -9  -3  -4    2.59    1.48
  -9  -3  -5   39.04    3.18
   9   3   5   33.86    2.69
  -9  -3  -5   36.86    2.72
   9   3   6   44.17    2.74
  -9  -3  -6   51.98    3.41
  -9  -3  -7   22.04    2.19
  -9  -3  -7   21.82    2.12
  -9  -4   2    1.26    1.15
  -9  -4   2    1.76    0.97
  -9  -4   1   64.16    3.85
   9   4  -1   72.30    4.13
   9   4   0   20.68    2.34
  -9  -4  -1    0.93    1.47
  -9  -4  -1    1.34    1.46
  -9  -4  -2    0.92    1.06
  -9  -4  -2    3.72    1.64
  -9  -4  -3   10.85    1.89
  -9  -4  -3    9.03    1.39
  -9  -4  -4   21.70    2.37
  -9  -4  -4   18.77    1.75
   9   4   4   20.96    2.22
  -9  -4  -4   20.21    2.02
  -9  -4  -5    0.72    1.03
   9   4   5    0.67    1.19
  -9  -4  -5    1.19    1.06
  -9  -4  -6   61.14    3.53
  -9  -4  -6   65.38    3.47
  -9  -4  -6   52.37    2.86
   9   4   6   44.50    2.78
  -9  -5   0   16.78    1.44
  -9  -5   0   19.68    1.83
  -9  -5  -1   -0.32    0.92
  -9  -5  -1    1.53    1.21
  -9  -5  -2    3.66    1.08
  -9  -5  -2    3.66    1.26
  -9  -5  -3    0.87    1.03
  -9  -5  -3    2.02    1.23
  -9  -5  -4    1.56    1.25
  -9  -5  -4    3.09    1.18
   9   5   4    3.26    1.27
  -9  -5  -4    2.96    1.08
  10  -2  -1    2.52    1.15
 -10   2   1    1.60    1.07
  10  -2   0    4.02    1.28
 -10   2   0    2.36    1.19
  10  -2   1    1.21    1.16
 -10   2  -1    1.07    1.09
  10  -2   2    7.98    1.35
  10  -1  -1   35.91    2.62
 -10   1   1   35.64    2.64
 -10   1   1   43.34    2.69
 -10   1   0   12.66    1.67
 -10   1   0   18.86    1.84
  10  -1   1    3.11    1.40
 -10   1  -1    1.87    1.18
  10  -1   2   15.22    1.74
 -10   1  -2   13.64    1.71
  10  -1   3   12.93    1.55
 -10   1  -3   10.97    1.48
  10   0  -1   22.02    2.00
 -10   0   1   21.65    2.03
 -10   0   1   22.63    2.02
 -10   0   0   38.99    2.72
 -10   0   0   44.14    2.90
  10   0   1    7.41    1.58
 -10   0  -1    5.35    1.22
 -10   0  -1    4.07    1.36
  10   0   2   20.61    2.03
 -10   0  -2   22.01    2.04
  10   0   3    5.69    1.36
 -10   0  -3    7.52    1.40
 -10   0  -4    2.36    0.99
  10   0   4    1.03    0.90
 -10   0  -4    1.89    1.18
 -10  -1   1    4.51    1.24
  10   1  -1    4.33    1.33
 -10  -1   1    4.96    1.27
 -10  -1   0    1.66    1.17
 -10  -1   0    1.61    1.06
 -10  -1  -1   45.25    3.00
  10   1   1   42.02    3.02
  10   1   2   16.14    1.87
 -10  -1  -3   23.10    1.95
  10   1   3   17.07    1.84
 -10  -1  -4   14.59    1.50
  10   1   4   12.60    1.49
 -10  -2   0   29.79    2.27
  10   2   1   40.16    2.81
 -10  -2  -1   40.67    2.76
  10   2   2    1.88    1.24
  10   2   3    1.99    1.18
 -10  -2  -3    1.51    1.37
 -10  -2  -3    2.89    1.14
   0   0   0    0.00    0.00


TITL Fe(1-ttmb)(NCS) in P-1
REM P-1 (#2 in standard setting)
CELL 1.54184   8.591829   9.494657  11.700452  80.4904  85.1942  89.4975
ZERR    2.00   0.000380   0.000317   0.000313   0.0025   0.0030   0.0031
LATT  1
SFAC C H N S Fe
UNIT 30.00 30.00 20.00 2.00 2.00
REM  CrysAlisPro recorded range (K): Min=297.9; max=298.0; aver:298.0
TEMP 25
SIZE 0.06 0.07 0.13
TREF
HKLF 4
END
_computing_structure_solution     'SHELXT 2014/5 (Sheldrick, 2014)'
;
_shelx_hkl_checksum                41111
_shelx_fab_file
;
-10 -1 1 0.0819 -0.0669
-10 0 1 0.0100 0.0106
-10 1 1 -0.1001 0.0057
-10 2 1 0.1073 0.0312
-9 -4 1 -0.1175 0.0646
-9 -4 2 -0.1590 0.0557
-9 -3 1 0.1070 -0.0238
-9 -3 2 0.1381 -0.0035
-9 -3 3 0.1064 0.0144
-9 -2 1 -0.0878 0.0426
-9 -2 2 -0.0827 0.0088
-9 -2 3 -0.0219 -0.0215
-9 -2 4 0.0534 -0.0373
-9 -1 1 0.0703 -0.0666
-9 -1 2 0.0226 -0.0438
-9 -1 3 -0.0539 -0.0168
-9 -1 4 -0.1053 0.0048
-9 -1 5 -0.1076 0.0152
-9 0 1 -0.0255 0.0338
-9 0 2 0.0299 0.0330
-9 0 3 0.0886 0.0265
-9 0 4 0.0968 0.0188
-9 0 5 0.0542 0.0120
-9 1 1 -0.0594 0.0116
-9 1 2 -0.0641 0.0111
-9 1 3 -0.0610 0.0095
-9 1 4 -0.0220 0.0042
-9 1 5 0.0342 -0.0031
-9 2 1 0.1328 -0.0010
-9 2 2 0.0577 -0.0144
-9 2 3 -0.0289 -0.0234
-9 2 4 -0.1073 -0.0226
-9 2 5 -0.1416 -0.0143
-9 3 1 -0.1279 -0.0316
-9 3 2 -0.0062 -0.0160
-9 3 3 0.1343 -0.0071
-9 3 4 0.2301 -0.0078
-9 3 5 0.2320 -0.0122
-9 4 1 0.0475 0.0149
-9 4 2 -0.0535 0.0029
-9 4 3 -0.1791 0.0111
-9 4 4 -0.2571 0.0337
-9 5 1 0.0367 0.0245
-9 5 2 0.0750 0.0515
-8 -6 1 -0.1085 0.0052
-8 -6 2 -0.1119 0.0095
-8 -5 1 0.1608 -0.0638
-8 -5 2 0.1755 -0.0558
-8 -5 3 0.1579 -0.0426
-8 -5 4 0.1017 -0.0244
-8 -4 1 -0.2192 0.0630
-8 -4 2 -0.2324 0.0613
-8 -4 3 -0.2011 0.0490
-8 -4 4 -0.1242 0.0301
-8 -4 5 -0.0332 0.0122
-8 -3 1 0.2233 -0.0141
-8 -3 2 0.2318 -0.0152
-8 -3 3 0.1805 -0.0119
-8 -3 4 0.0845 -0.0095
-8 -3 5 -0.0087 -0.0135
-8 -3 6 -0.0585 -0.0248
-8 -2 1 -0.1514 -0.0078
-8 -2 2 -0.1474 -0.0190
-8 -2 3 -0.0838 -0.0270
-8 -2 4 0.0077 -0.0241
-8 -2 5 0.0748 -0.0062
-8 -2 6 0.0881 0.0225
-8 -1 1 0.0621 -0.0160
-8 -1 2 0.0223 0.0012
-8 -1 3 -0.0515 0.0171
-8 -1 4 -0.1125 0.0224
-8 -1 5 -0.1232 0.0126
-8 -1 6 -0.0872 -0.0086
-8 -1 7 -0.0400 -0.0310
-8 0 1 -0.0183 0.0218
-8 0 2 0.0623 0.0177
-8 0 3 0.1470 0.0106
-8 0 4 0.1734 0.0068
-8 0 5 0.1266 0.0089
-8 0 6 0.0491 0.0140
-8 0 7 0.0001 0.0165
-8 1 1 0.0004 0.0130
-8 1 2 -0.0694 0.0073
-8 1 3 -0.1365 0.0023
-8 1 4 -0.1359 -0.0055
-8 1 5 -0.0671 -0.0153
-8 1 6 0.0114 -0.0211
-8 1 7 0.0398 -0.0172
-8 2 1 0.0499 -0.0254
-8 2 2 0.0344 -0.0287
-8 2 3 0.0277 -0.0302
-8 2 4 -0.0071 -0.0235
-8 2 5 -0.0595 -0.0096
-8 2 6 -0.0879 0.0036
-8 2 7 -0.0664 0.0075
-8 3 1 -0.1205 -0.0084
-8 3 2 -0.0051 0.0022
-8 3 3 0.1011 0.0123
-8 3 4 0.1821 0.0142
-8 3 5 0.2095 0.0088
-8 3 6 0.1694 0.0033
-8 3 7 0.0858 0.0034
-8 4 1 0.1344 0.0196
-8 4 2 -0.0111 0.0144
-8 4 3 -0.1677 0.0186
-8 4 4 -0.2780 0.0318
-8 4 5 -0.2936 0.0435
-8 4 6 -0.2141 0.0422
-8 5 1 -0.0617 0.0220
-8 5 2 0.0274 0.0377
-8 5 3 0.1484 0.0176
-8 5 4 0.2415 -0.0283
-8 5 5 0.2533 -0.0733
-8 5 6 0.1805 -0.0927
-8 6 1 -0.0336 -0.0393
-8 6 2 -0.0408 -0.0925
-8 6 3 -0.0819 -0.0907
-8 6 4 -0.1237 -0.0425
-8 7 1 0.0766 -0.0135
-7 -7 1 0.0936 0.0906
-7 -7 2 0.0940 0.0497
-7 -7 3 0.0955 0.0044
-7 -6 1 -0.2002 -0.0563
-7 -6 2 -0.2193 -0.0266
-7 -6 3 -0.2107 0.0105
-7 -6 4 -0.1760 0.0416
-7 -5 1 0.3181 0.0143
-7 -5 2 0.3509 0.0048
-7 -5 3 0.3353 -0.0101
-7 -5 4 0.2685 -0.0209
-7 -5 5 0.1714 -0.0216
-7 -5 6 0.0782 -0.0134
-7 -4 1 -0.4425 0.0155
-7 -4 2 -0.4556 0.0173
-7 -4 3 -0.4117 0.0173
-7 -4 4 -0.3096 0.0119
-7 -4 5 -0.1800 0.0021
-7 -4 6 -0.0658 -0.0069
-7 -4 7 0.0057 -0.0094
-7 -3 1 0.5270 -0.0057
-7 -3 2 0.5082 -0.0127
-7 -3 3 0.4226 -0.0150
-7 -3 4 0.2833 -0.0129
-7 -3 5 0.1382 -0.0109
-7 -3 6 0.0351 -0.0134
-7 -3 7 -0.0107 -0.0212
-7 -3 8 -0.0199 -0.0298
-7 -2 1 -0.4846 -0.0202
-7 -2 2 -0.4561 -0.0148
-7 -2 3 -0.3553 -0.0102
-7 -2 4 -0.2095 -0.0029
-7 -2 5 -0.0797 0.0119
-7 -2 6 -0.0119 0.0345
-7 -2 7 -0.0054 0.0583
-7 -2 8 -0.0224 0.0727
-7 -1 1 0.3048 0.0162
-7 -1 2 0.2712 0.0207
-7 -1 3 0.1871 0.0240
-7 -1 4 0.0863 0.0196
-7 -1 5 0.0205 0.0022
-7 -1 6 0.0123 -0.0263
-7 -1 7 0.0395 -0.0558
-7 -1 8 0.0605 -0.0741
-7 0 1 -0.1101 0.0033
-7 0 2 -0.0369 -0.0014
-7 0 3 0.0421 -0.0075
-7 0 4 0.0822 -0.0085
-7 0 5 0.0580 -0.0000
-7 0 6 -0.0085 0.0157
-7 0 7 -0.0640 0.0310
-7 0 8 -0.0696 0.0383
-7 0 9 -0.0323 0.0356
-7 1 1 0.0178 0.0069
-7 1 2 -0.1022 0.0042
-7 1 3 -0.2023 0.0025
-7 1 4 -0.2165 -0.0026
-7 1 5 -0.1361 -0.0122
-7 1 6 -0.0199 -0.0210
-7 1 7 0.0530 -0.0219
-7 1 8 0.0463 -0.0125
-7 1 9 -0.0103 0.0018
-7 2 1 0.0048 -0.0263
-7 2 2 0.1010 -0.0283
-7 2 3 0.1947 -0.0288
-7 2 4 0.2100 -0.0211
-7 2 5 0.1365 -0.0048
-7 2 6 0.0329 0.0114
-7 2 7 -0.0271 0.0164
-7 2 8 -0.0164 0.0064
-7 2 9 0.0311 -0.0119
-7 3 1 -0.0630 0.0021
-7 3 2 -0.0525 0.0153
-7 3 3 -0.0702 0.0317
-7 3 4 -0.0651 0.0384
-7 3 5 -0.0260 0.0313
-7 3 6 0.0170 0.0172
-7 3 7 0.0304 0.0076
-7 3 8 0.0119 0.0086
-7 3 9 -0.0107 0.0170
-7 4 1 0.1563 0.0372
-7 4 2 0.0479 0.0288
-7 4 3 -0.0319 0.0133
-7 4 4 -0.0869 0.0015
-7 4 5 -0.1113 -0.0040
-7 4 6 -0.0991 -0.0078
-7 4 7 -0.0618 -0.0148
-7 4 8 -0.0284 -0.0245
-7 5 1 -0.1838 -0.0182
-7 5 2 -0.0743 -0.0166
-7 5 3 0.0386 -0.0254
-7 5 4 0.1266 -0.0436
-7 5 5 0.1597 -0.0585
-7 5 6 0.1316 -0.0560
-7 5 7 0.0723 -0.0330
-7 5 8 0.0283 -0.0002
-7 6 1 0.1081 -0.0343
-7 6 2 0.0786 -0.0663
-7 6 3 0.0133 -0.0528
-7 6 4 -0.0608 -0.0018
-7 6 5 -0.1018 0.0567
-7 6 6 -0.0886 0.0911
-7 6 7 -0.0404 0.0872
-7 7 1 -0.0095 0.0217
-7 7 2 -0.0561 0.1078
-7 7 3 -0.0561 0.1325
-7 7 4 -0.0188 0.0965
-7 7 5 0.0188 0.0282
-7 8 1 -0.0319 0.0550
-7 8 2 0.0307 -0.0401
-7 8 3 0.0552 -0.0980
-6 -8 1 0.1155 -0.1115
-6 -8 2 0.0748 -0.0891
-6 -8 3 0.0232 -0.0635
-6 -7 1 -0.0709 0.0681
-6 -7 2 -0.0305 0.0438
-6 -7 3 0.0207 0.0174
-6 -7 4 0.0693 -0.0075
-6 -7 5 0.1015 -0.0253
-6 -6 1 -0.1162 -0.0283
-6 -6 2 -0.1770 -0.0034
-6 -6 3 -0.2174 0.0249
-6 -6 4 -0.2314 0.0484
-6 -6 5 -0.2191 0.0583
-6 -6 6 -0.1867 0.0511
-6 -5 1 0.3785 0.0181
-6 -5 2 0.4718 0.0019
-6 -5 3 0.5042 -0.0209
-6 -5 4 0.4703 -0.0392
-6 -5 5 0.3857 -0.0437
-6 -5 6 0.2805 -0.0325
-6 -5 7 0.1828 -0.0127
-6 -4 1 -0.6552 -0.0141
-6 -4 2 -0.7399 -0.0095
-6 -4 3 -0.7419 0.0006
-6 -4 4 -0.6558 0.0072
-6 -4 5 -0.5081 0.0045
-6 -4 6 -0.3453 -0.0061
-6 -4 7 -0.2060 -0.0177
-6 -4 8 -0.1047 -0.0233
-6 -3 1 0.9220 0.0073
-6 -3 2 0.9433 0.0046
-6 -3 3 0.8724 0.0014
-6 -3 4 0.7170 0.0023
-6 -3 5 0.5209 0.0076
-6 -3 6 0.3387 0.0139
-6 -3 7 0.2020 0.0171
-6 -3 8 0.1085 0.0160
-6 -3 9 0.0384 0.0131
-6 -2 1 -1.0904 -0.0085
-6 -2 2 -1.0549 -0.0031
-6 -2 3 -0.9140 0.0001
-6 -2 4 -0.6955 0.0009
-6 -2 5 -0.4665 0.0030
-6 -2 6 -0.2896 0.0090
-6 -2 7 -0.1835 0.0177
-6 -2 8 -0.1212 0.0233
-6 -2 9 -0.0649 0.0199
-6 -1 1 1.0160 0.0062
-6 -1 2 0.9724 0.0052
-6 -1 3 0.8258 0.0072
-6 -1 4 0.6104 0.0075
-6 -1 5 0.3997 0.0000
-6 -1 6 0.2533 -0.0170
-6 -1 7 0.1781 -0.0377
-6 -1 8 0.1363 -0.0510
-6 -1 9 0.0874 -0.0488
-6 -1 10 0.0230 -0.0322
-6 0 1 -0.6886 0.0109
-6 0 2 -0.6373 0.0062
-6 0 3 -0.5286 -0.0033
-6 0 4 -0.3914 -0.0110
-6 0 5 -0.2751 -0.0092
-6 0 6 -0.2063 0.0038
-6 0 7 -0.1699 0.0223
-6 0 8 -0.1308 0.0362
-6 0 9 -0.0710 0.0392
-6 0 10 -0.0052 0.0320
-6 1 1 0.3023 -0.0160
-6 1 2 0.1935 -0.0140
-6 1 3 0.0915 -0.0072
-6 1 4 0.0331 -0.0008
-6 1 5 0.0364 0.0000
-6 1 6 0.0770 -0.0045
-6 1 7 0.1024 -0.0095
-6 1 8 0.0763 -0.0103
-6 1 9 0.0087 -0.0070
-6 1 10 -0.0545 -0.0044
-6 2 1 -0.0432 -0.0043
-6 2 2 0.1194 -0.0064
-6 2 3 0.2526 -0.0091
-6 2 4 0.2925 -0.0064
-6 2 5 0.2269 0.0033
-6 2 6 0.1103 0.0144
-6 2 7 0.0238 0.0177
-6 2 8 0.0137 0.0092
-6 2 9 0.0605 -0.0061
-6 2 10 0.1047 -0.0173
-6 3 1 -0.0986 0.0051
-6 3 2 -0.2216 0.0193
-6 3 3 -0.3484 0.0345
-6 3 4 -0.3991 0.0382
-6 3 5 -0.3443 0.0254
-6 3 6 -0.2259 0.0041
-6 3 7 -0.1190 -0.0114
-6 3 8 -0.0719 -0.0115
-6 3 9 -0.0763 0.0018
-6 3 10 -0.0881 0.0170
-6 4 1 0.2181 0.0379
-6 4 2 0.2247 0.0195
-6 4 3 0.2747 -0.0108
-6 4 4 0.3057 -0.0346
-6 4 5 0.2783 -0.0408
-6 4 6 0.2025 -0.0316
-6 4 7 0.1177 -0.0184
-6 4 8 0.0564 -0.0113
-6 4 9 0.0238 -0.0124
-6 4 10 0.0070 -0.0165
-6 5 1 -0.3015 -0.0620
-6 5 2 -0.2307 -0.0596
-6 5 3 -0.2018 -0.0419
-6 5 4 -0.1869 -0.0214
-6 5 5 -0.1613 -0.0053
-6 5 6 -0.1192 0.0068
-6 5 7 -0.0677 0.0176
-6 5 8 -0.0149 0.0273
-6 5 9 0.0320 0.0318
-6 6 1 0.2700 0.0161
-6 6 2 0.2273 0.0155
-6 6 3 0.1907 0.0232
-6 6 4 0.1517 0.0397
-6 6 5 0.1121 0.0547
-6 6 6 0.0782 0.0546
-6 6 7 0.0495 0.0352
-6 6 8 0.0183 0.0050
-6 7 1 -0.1459 0.0346
-6 7 2 -0.1865 0.0808
-6 7 3 -0.1965 0.0837
-6 7 4 -0.1665 0.0439
-6 7 5 -0.1177 -0.0144
-6 7 6 -0.0793 -0.0592
-6 7 7 -0.0630 -0.0713
-6 8 1 0.0451 -0.0052
-6 8 2 0.1366 -0.1081
-6 8 3 0.1805 -0.1585
-6 8 4 0.1629 -0.1451
-6 8 5 0.1116 -0.0868
-6 8 6 0.0683 -0.0176
-6 9 1 -0.0235 -0.0639
-6 9 2 -0.1021 0.0386
-6 9 3 -0.1377 0.1131
-5 -9 1 -0.1182 -0.0161
-5 -9 2 -0.0860 -0.0167
-5 -8 1 0.2850 -0.0389
-5 -8 2 0.2398 -0.0329
-5 -8 3 0.1965 -0.0307
-5 -8 4 0.1657 -0.0296
-5 -7 1 -0.3978 0.0264
-5 -7 2 -0.3382 0.0255
-5 -7 3 -0.2656 0.0274
-5 -7 4 -0.1974 0.0272
-5 -7 5 -0.1431 0.0220
-5 -7 6 -0.1030 0.0137
-5 -6 1 0.3110 0.0237
-5 -6 2 0.2214 0.0228
-5 -6 3 0.1333 0.0184
-5 -6 4 0.0620 0.0136
-5 -6 5 0.0152 0.0097
-5 -6 6 -0.0084 0.0055
-5 -6 7 -0.0143 0.0002
-5 -5 1 -0.0190 -0.0374
-5 -5 2 0.1321 -0.0399
-5 -5 3 0.2353 -0.0406
-5 -5 4 0.2759 -0.0380
-5 -5 5 0.2601 -0.0298
-5 -5 6 0.2102 -0.0161
-5 -5 7 0.1498 -0.0010
-5 -5 8 0.0918 0.0088
-5 -4 1 -0.3858 0.0106
-5 -4 2 -0.5848 0.0131
-5 -4 3 -0.6928 0.0176
-5 -4 4 -0.6906 0.0187
-5 -4 5 -0.5955 0.0120
-5 -4 6 -0.4520 -0.0016
-5 -4 7 -0.3057 -0.0157
-5 -4 8 -0.1823 -0.0222
-5 -4 9 -0.0857 -0.0178
-5 -3 1 0.8723 0.0089
-5 -3 2 1.0363 0.0077
-5 -3 3 1.0871 0.0046
-5 -3 4 1.0118 0.0047
-5 -3 5 0.8400 0.0109
-5 -3 6 0.6281 0.0214
-5 -3 7 0.4264 0.0307
-5 -3 8 0.2584 0.0341
-5 -3 9 0.1242 0.0307
-5 -3 10 0.0209 0.0242
-5 -2 1 -1.4188 -0.0057
-5 -2 2 -1.4809 -0.0026
-5 -2 3 -1.4061 -0.0008
-5 -2 4 -1.2078 -0.0025
-5 -2 5 -0.9428 -0.0073
-5 -2 6 -0.6804 -0.0127
-5 -2 7 -0.4627 -0.0169
-5 -2 8 -0.2918 -0.0208
-5 -2 9 -0.1493 -0.0269
-5 -2 10 -0.0276 -0.0359
-5 -1 1 1.8280 -0.0046
-5 -1 2 1.8136 -0.0075
-5 -1 3 1.6321 -0.0060
-5 -1 4 1.3203 -0.0022
-5 -1 5 0.9656 -0.0004
-5 -1 6 0.6556 -0.0034
-5 -1 7 0.4302 -0.0086
-5 -1 8 0.2732 -0.0089
-5 -1 9 0.1469 0.0014
-5 -1 10 0.0328 0.0212
-5 -1 11 -0.0560 0.0410
-5 0 1 -1.8150 0.0199
-5 0 2 -1.7789 0.0171
-5 0 3 -1.5828 0.0072
-5 0 4 -1.2608 -0.0043
-5 0 5 -0.9004 -0.0094
-5 0 6 -0.5890 -0.0038
-5 0 7 -0.3658 0.0085
-5 0 8 -0.2162 0.0179
-5 0 9 -0.1051 0.0165
-5 0 10 -0.0144 0.0043
-5 0 11 0.0491 -0.0103
-5 1 1 1.3372 -0.0343
-5 1 2 1.2654 -0.0298
-5 1 3 1.1046 -0.0163
-5 1 4 0.8743 0.0004
-5 1 5 0.6271 0.0118
-5 1 6 0.4116 0.0130
-5 1 7 0.2452 0.0060
-5 1 8 0.1187 -0.0029
-5 1 9 0.0209 -0.0082
-5 1 10 -0.0455 -0.0099
-5 1 11 -0.0713 -0.0115
-5 2 1 -0.6759 0.0247
-5 2 2 -0.5232 0.0238
-5 2 3 -0.3662 0.0172
-5 2 4 -0.2312 0.0093
-5 2 5 -0.1379 0.0046
-5 2 6 -0.0808 0.0039
-5 2 7 -0.0334 0.0041
-5 2 8 0.0255 0.0018
-5 2 9 0.0895 -0.0019
-5 2 10 0.1296 -0.0023
-5 2 11 0.1226 0.0046
-5 3 1 0.1323 -0.0000
-5 3 2 -0.0648 0.0056
-5 3 3 -0.2394 0.0110
-5 3 4 -0.3374 0.0095
-5 3 5 -0.3371 -0.0017
-5 3 6 -0.2690 -0.0173
-5 3 7 -0.1949 -0.0268
-5 3 8 -0.1610 -0.0230
-5 3 9 -0.1676 -0.0084
-5 3 10 -0.1778 0.0066
-5 3 11 -0.1555 0.0116
-5 4 1 0.2122 0.0071
-5 4 2 0.3445 -0.0096
-5 4 3 0.4884 -0.0301
-5 4 4 0.5729 -0.0400
-5 4 5 0.5521 -0.0307
-5 4 6 0.4408 -0.0067
-5 4 7 0.3009 0.0170
-5 4 8 0.1950 0.0261
-5 4 9 0.1453 0.0175
-5 4 10 0.1312 -0.0002
-5 4 11 0.1172 -0.0142
-5 5 1 -0.3939 -0.0449
-5 5 2 -0.4098 -0.0339
-5 5 3 -0.4739 -0.0056
-5 5 4 -0.5255 0.0226
-5 5 5 -0.5061 0.0353
-5 5 6 -0.4035 0.0296
-5 5 7 -0.2562 0.0143
-5 5 8 -0.1215 0.0019
-5 5 9 -0.0381 -0.0014
-5 5 10 -0.0105 0.0024
-5 6 1 0.4082 0.0475
-5 6 2 0.3724 0.0572
-5 6 3 0.3823 0.0478
-5 6 4 0.3980 0.0294
-5 6 5 0.3734 0.0120
-5 6 6 0.2905 -0.0006
-5 6 7 0.1680 -0.0092
-5 6 8 0.0450 -0.0150
-5 6 9 -0.0423 -0.0167
-5 6 10 -0.0762 -0.0123
-5 7 1 -0.2652 0.0052
-5 7 2 -0.2714 0.0002
-5 7 3 -0.2916 -0.0079
-5 7 4 -0.2965 -0.0218
-5 7 5 -0.2661 -0.0362
-5 7 6 -0.2018 -0.0418
-5 7 7 -0.1201 -0.0331
-5 7 8 -0.0411 -0.0142
-5 7 9 0.0190 0.0032
-5 8 1 0.0823 -0.0410
-5 8 2 0.1549 -0.0831
-5 8 3 0.2084 -0.0961
-5 8 4 0.2152 -0.0724
-5 8 5 0.1801 -0.0251
-5 8 6 0.1299 0.0213
-5 8 7 0.0900 0.0462
-5 8 8 0.0673 0.0447
-5 9 1 0.0070 0.0108
-5 9 2 -0.0887 0.0973
-5 9 3 -0.1479 0.1519
-5 9 4 -0.1478 0.1551
-5 9 5 -0.1059 0.1125
-5 9 6 -0.0616 0.0494
-4 -10 1 0.0616 0.0644
-4 -9 1 -0.1769 -0.0783
-4 -9 2 -0.1613 -0.0622
-4 -9 3 -0.1461 -0.0370
-4 -9 4 -0.1418 -0.0047
-4 -8 1 0.3794 0.0317
-4 -8 2 0.3793 0.0294
-4 -8 3 0.3737 0.0153
-4 -8 4 0.3707 -0.0071
-4 -8 5 0.3626 -0.0287
-4 -8 6 0.3315 -0.0413
-4 -7 1 -0.6479 0.0018
-4 -7 2 -0.6327 0.0047
-4 -7 3 -0.5948 0.0171
-4 -7 4 -0.5495 0.0324
-4 -7 5 -0.4998 0.0417
-4 -7 6 -0.4371 0.0402
-4 -7 7 -0.3523 0.0307
-4 -6 1 0.8389 0.0229
-4 -6 2 0.7788 0.0114
-4 -6 3 0.6890 -0.0089
-4 -6 4 0.5912 -0.0289
-4 -6 5 0.4971 -0.0396
-4 -6 6 0.4071 -0.0376
-4 -6 7 0.3175 -0.0266
-4 -6 8 0.2298 -0.0132
-4 -5 1 -0.8282 -0.0536
-4 -5 2 -0.6762 -0.0423
-4 -5 3 -0.5246 -0.0222
-4 -5 4 -0.3991 -0.0005
-4 -5 5 -0.3065 0.0155
-4 -5 6 -0.2375 0.0220
-4 -5 7 -0.1791 0.0185
-4 -5 8 -0.1276 0.0070
-4 -5 9 -0.0898 -0.0092
-4 -4 1 0.6129 0.0375
-4 -4 2 0.3339 0.0339
-4 -4 3 0.1072 0.0246
-4 -4 4 -0.0304 0.0118
-4 -4 5 -0.0798 -0.0012
-4 -4 6 -0.0730 -0.0104
-4 -4 7 -0.0484 -0.0114
-4 -4 8 -0.0275 -0.0012
-4 -4 9 -0.0099 0.0190
-4 -4 10 0.0121 0.0425
-4 -3 1 -0.1727 -0.0018
-4 -3 2 0.1805 -0.0032
-4 -3 3 0.4421 -0.0028
-4 -3 4 0.5656 0.0009
-4 -3 5 0.5550 0.0075
-4 -3 6 0.4574 0.0139
-4 -3 7 0.3307 0.0147
-4 -3 8 0.2135 0.0059
-4 -3 9 0.1171 -0.0117
-4 -3 10 0.0396 -0.0315
-4 -3 11 -0.0160 -0.0445
-4 -2 1 -0.6001 -0.0095
-4 -2 2 -0.8998 -0.0052
-4 -2 3 -1.0742 -0.0026
-4 -2 4 -1.0929 -0.0034
-4 -2 5 -0.9768 -0.0074
-4 -2 6 -0.7829 -0.0120
-4 -2 7 -0.5706 -0.0140
-4 -2 8 -0.3751 -0.0121
-4 -2 9 -0.2069 -0.0079
-4 -2 10 -0.0703 -0.0049
-4 -2 11 0.0238 -0.0052
-4 -1 1 1.6411 0.0026
-4 -1 2 1.8070 -0.0042
-4 -1 3 1.7904 -0.0074
-4 -1 4 1.6008 -0.0068
-4 -1 5 1.3014 -0.0047
-4 -1 6 0.9751 -0.0032
-4 -1 7 0.6825 -0.0018
-4 -1 8 0.4419 0.0028
-4 -1 9 0.2442 0.0139
-4 -1 10 0.0833 0.0306
-4 -1 11 -0.0303 0.0464
-4 0 1 -2.5085 0.0033
-4 0 2 -2.5656 0.0076
-4 0 3 -2.3837 0.0068
-4 0 4 -1.9988 0.0033
-4 0 5 -1.5129 0.0019
-4 0 6 -1.0437 0.0053
-4 0 7 -0.6678 0.0108
-4 0 8 -0.3993 0.0107
-4 0 9 -0.2114 -0.0008
-4 0 10 -0.0760 -0.0218
-4 0 11 0.0144 -0.0421
-4 0 12 0.0553 -0.0497
-4 1 1 2.6931 -0.0136
-4 1 2 2.6825 -0.0122
-4 1 3 2.4452 -0.0042
-4 1 4 2.0091 0.0069
-4 1 5 1.4726 0.0139
-4 1 6 0.9575 0.0120
-4 1 7 0.5513 0.0028
-4 1 8 0.2799 -0.0060
-4 1 9 0.1210 -0.0075
-4 1 10 0.0376 -0.0006
-4 1 11 0.0011 0.0079
-4 1 12 -0.0061 0.0099
-4 2 1 -2.1249 0.0234
-4 2 2 -2.0285 0.0224
-4 2 3 -1.8001 0.0143
-4 2 4 -1.4500 0.0018
-4 2 5 -1.0360 -0.0091
-4 2 6 -0.6371 -0.0134
-4 2 7 -0.3170 -0.0106
-4 2 8 -0.1033 -0.0045
-4 2 9 0.0087 0.0010
-4 2 10 0.0417 0.0051
-4 2 11 0.0261 0.0098
-4 2 12 -0.0065 0.0164
-4 3 1 1.2071 -0.0109
-4 3 2 1.0138 -0.0130
-4 3 3 0.7909 -0.0124
-4 3 4 0.5544 -0.0107
-4 3 5 0.3294 -0.0101
-4 3 6 0.1394 -0.0110
-4 3 7 -0.0040 -0.0110
-4 3 8 -0.0985 -0.0071
-4 3 9 -0.1441 0.0002
-4 3 10 -0.1416 0.0061
-4 3 11 -0.1007 0.0058
-4 3 12 -0.0439 -0.0013
-4 4 1 -0.3857 -0.0123
-4 4 2 -0.1717 -0.0154
-4 4 3 0.0345 -0.0171
-4 4 4 0.1942 -0.0126
-4 4 5 0.2791 0.0006
-4 4 6 0.2913 0.0185
-4 4 7 0.2620 0.0310
-4 4 8 0.2281 0.0291
-4 4 9 0.2067 0.0119
-4 4 10 0.1896 -0.0117
-4 4 11 0.1599 -0.0288
-4 4 12 0.1116 -0.0318
-4 5 1 -0.1482 0.0082
-4 5 2 -0.2764 0.0173
-4 5 3 -0.4175 0.0308
-4 5 4 -0.5206 0.0385
-4 5 5 -0.5361 0.0311
-4 5 6 -0.4566 0.0093
-4 5 7 -0.3244 -0.0148
-4 5 8 -0.2028 -0.0256
-4 5 9 -0.1344 -0.0159
-4 5 10 -0.1196 0.0083
-4 5 11 -0.1270 0.0325
-4 6 1 0.3829 0.0159
-4 6 2 0.4030 0.0178
-4 6 3 0.4605 0.0031
-4 6 4 0.5114 -0.0175
-4 6 5 0.4971 -0.0294
-4 6 6 0.3935 -0.0257
-4 6 7 0.2320 -0.0116
-4 6 8 0.0779 0.0007
-4 6 9 -0.0130 0.0021
-4 6 10 -0.0256 -0.0071
-4 6 11 0.0123 -0.0187
-4 7 1 -0.3540 -0.0140
-4 7 2 -0.3351 -0.0331
-4 7 3 -0.3504 -0.0341
-4 7 4 -0.3695 -0.0225
-4 7 5 -0.3460 -0.0086
-4 7 6 -0.2577 0.0006
-4 7 7 -0.1234 0.0043
-4 7 8 0.0094 0.0060
-4 7 9 0.0945 0.0075
-4 7 10 0.1122 0.0076
-4 8 1 0.1622 -0.0143
-4 8 2 0.1730 -0.0037
-4 8 3 0.1951 0.0024
-4 8 4 0.2059 0.0083
-4 8 5 0.1850 0.0160
-4 8 6 0.1300 0.0223
-4 8 7 0.0565 0.0219
-4 8 8 -0.0123 0.0136
-4 8 9 -0.0582 0.0027
-4 9 1 0.0247 0.0217
-4 9 2 -0.0264 0.0460
-4 9 3 -0.0647 0.0628
-4 9 4 -0.0716 0.0588
-4 9 5 -0.0504 0.0338
-4 9 6 -0.0213 0.0008
-4 9 7 -0.0039 -0.0229
-4 10 1 -0.0884 0.0003
-4 10 2 -0.0276 -0.0481
-4 10 3 0.0101 -0.0898
-4 10 4 0.0100 -0.1026
-4 10 5 -0.0151 -0.0810
-3 -10 1 -0.0686 -0.0317
-3 -10 2 -0.1013 -0.0337
-3 -9 1 -0.0492 -0.0192
-3 -9 2 -0.0467 -0.0073
-3 -9 4 -0.0285 0.0287
-3 -9 5 -0.0400 0.0522
-3 -8 1 0.2492 0.0317
-3 -8 2 0.3029 0.0291
-3 -8 3 0.3308 0.0163
-3 -8 4 0.3451 -0.0079
-3 -8 5 0.3481 -0.0364
-3 -8 6 0.3294 -0.0574
-3 -7 1 -0.5720 -0.0041
-3 -7 2 -0.6432 -0.0101
-3 -7 3 -0.6663 -0.0046
-3 -7 4 -0.6565 0.0108
-3 -7 5 -0.6221 0.0276
-3 -7 6 -0.5595 0.0365
-3 -7 7 -0.4615 0.0336
-3 -7 8 -0.3317 0.0224
-3 -6 1 1.0111 -0.0049
-3 -6 2 1.0391 -0.0038
-3 -6 3 0.9935 -0.0129
-3 -6 4 0.9007 -0.0268
-3 -6 5 0.7843 -0.0356
-3 -6 6 0.6564 -0.0328
-3 -6 7 0.5188 -0.0201
-3 -6 8 0.3747 -0.0055
-3 -6 9 0.2370 0.0034
-3 -5 1 -1.4752 -0.0159
-3 -5 2 -1.3925 -0.0112
-3 -5 3 -1.2349 0.0038
-3 -5 4 -1.0394 0.0219
-3 -5 5 -0.8374 0.0330
-3 -5 6 -0.6462 0.0307
-3 -5 7 -0.4719 0.0169
-3 -5 8 -0.3188 -0.0011
-3 -5 9 -0.1959 -0.0158
-3 -5 10 -0.1125 -0.0239
-3 -4 1 1.8618 0.0203
-3 -4 2 1.5914 0.0191
-3 -4 3 1.2800 0.0091
-3 -4 4 0.9822 -0.0052
-3 -4 5 0.7277 -0.0162
-3 -4 6 0.5191 -0.0176
-3 -4 7 0.3460 -0.0074
-3 -4 8 0.2031 0.0120
-3 -4 9 0.0975 0.0350
-3 -4 10 0.0389 0.0553
-3 -4 11 0.0242 0.0669
-3 -3 1 -2.0139 0.0022
-3 -3 2 -1.5342 -0.0017
-3 -3 3 -1.0562 -0.0008
-3 -3 4 -0.6618 0.0038
-3 -3 5 -0.3847 0.0086
-3 -3 6 -0.2097 0.0084
-3 -3 7 -0.0986 -0.0010
-3 -3 8 -0.0213 -0.0210
-3 -3 9 0.0293 -0.0480
-3 -3 10 0.0476 -0.0737
-3 -3 11 0.0358 -0.0888
-3 -2 1 1.6185 -0.0127
-3 -2 2 1.0360 -0.0086
-3 -2 3 0.4921 -0.0069
-3 -2 4 0.0805 -0.0077
-3 -2 5 -0.1626 -0.0092
-3 -2 6 -0.2597 -0.0078
-3 -2 7 -0.2646 -0.0001
-3 -2 8 -0.2268 0.0153
-3 -2 9 -0.1728 0.0353
-3 -2 10 -0.1132 0.0531
-3 -2 11 -0.0578 0.0615
-3 -2 12 -0.0203 0.0571
-3 -1 1 -0.4241 0.0032
-3 -1 2 0.0865 -0.0019
-3 -1 3 0.4961 -0.0036
-3 -1 4 0.7414 -0.0023
-3 -1 5 0.8142 -0.0002
-3 -1 6 0.7541 0.0001
-3 -1 7 0.6191 -0.0022
-3 -1 8 0.4571 -0.0061
-3 -1 9 0.2964 -0.0087
-3 -1 11 0.0497 -0.0022
-3 -1 12 -0.0047 0.0040
-3 0 1 -1.3020 -0.0053
-3 0 2 -1.6414 0.0026
-3 0 3 -1.7768 0.0067
-3 0 4 -1.6990 0.0079
-3 0 5 -1.4606 0.0087
-3 0 6 -1.1472 0.0107
-3 0 7 -0.8352 0.0123
-3 0 8 -0.5656 0.0092
-3 0 9 -0.3471 -0.0020
-3 0 10 -0.1778 -0.0197
-3 0 11 -0.0607 -0.0367
-3 0 12 -0.0004 -0.0437
-3 1 1 2.7516 0.0195
-3 1 2 2.9289 0.0139
-3 1 3 2.8204 0.0103
-3 1 4 2.4484 0.0080
-3 1 5 1.9134 0.0043
-3 1 6 1.3511 -0.0028
-3 1 7 0.8730 -0.0106
-3 1 8 0.5291 -0.0131
-3 1 9 0.3108 -0.0054
-3 1 10 0.1822 0.0114
-3 1 11 0.1088 0.0285
-3 1 12 0.0688 0.0349
-3 2 1 -3.2155 -0.0153
-3 2 2 -3.2549 -0.0150
-3 2 3 -3.0264 -0.0160
-3 2 4 -2.5459 -0.0184
-3 2 5 -1.9104 -0.0190
-3 2 6 -1.2631 -0.0149
-3 2 7 -0.7320 -0.0060
-3 2 8 -0.3826 0.0031
-3 2 9 -0.2078 0.0069
-3 2 10 -0.1522 0.0036
-3 2 11 -0.1489 -0.0029
-3 2 12 -0.1463 -0.0057
-3 3 1 2.6714 -0.0027
-3 3 2 2.5697 -0.0034
-3 3 3 2.3076 -0.0023
-3 3 4 1.8879 0.0017
-3 3 5 1.3685 0.0070
-3 3 6 0.8484 0.0104
-3 3 7 0.4272 0.0101
-3 3 8 0.1638 0.0071
-3 3 9 0.0589 0.0043
-3 3 10 0.0648 0.0037
-3 3 11 0.1130 0.0041
-3 3 12 0.1437 0.0035
-3 4 1 -1.6565 0.0015
-3 4 2 -1.4467 0.0049
-3 4 3 -1.1860 0.0083
-3 4 4 -0.8837 0.0105
-3 4 5 -0.5681 0.0111
-3 4 6 -0.2825 0.0104
-3 4 7 -0.0681 0.0077
-3 4 8 0.0533 0.0008
-3 4 9 0.0859 -0.0109
-3 4 10 0.0561 -0.0248
-3 4 11 0.0024 -0.0355
-3 4 12 -0.0392 -0.0383
-3 5 1 0.7105 0.0163
-3 5 2 0.4926 0.0155
-3 5 3 0.2726 0.0133
-3 5 4 0.0771 0.0089
-3 5 5 -0.0663 0.0007
-3 5 6 -0.1437 -0.0104
-3 5 7 -0.1637 -0.0184
-3 5 8 -0.1517 -0.0147
-3 5 9 -0.1323 0.0048
-3 5 10 -0.1167 0.0348
-3 5 11 -0.1025 0.0623
-3 5 12 -0.0832 0.0745
-3 6 1 -0.0721 -0.0190
-3 6 2 0.0609 -0.0192
-3 6 3 0.1963 -0.0229
-3 6 4 0.3018 -0.0272
-3 6 5 0.3377 -0.0247
-3 6 6 0.2906 -0.0116
-3 6 7 0.1898 0.0058
-3 6 8 0.0913 0.0139
-3 6 9 0.0417 0.0026
-3 6 10 0.0504 -0.0262
-3 6 11 0.0890 -0.0579
-3 7 1 -0.2359 0.0036
-3 7 2 -0.2699 -0.0056
-3 7 3 -0.3155 -0.0030
-3 7 4 -0.3502 0.0093
-3 7 5 -0.3323 0.0197
-3 7 6 -0.2422 0.0184
-3 7 7 -0.1050 0.0065
-3 7 8 0.0220 -0.0047
-3 7 9 0.0863 -0.0039
-3 7 10 0.0733 0.0110
-3 7 11 0.0125 0.0307
-3 8 1 0.2704 0.0105
-3 8 2 0.2523 0.0275
-3 8 3 0.2430 0.0294
-3 8 4 0.2349 0.0180
-3 8 5 0.2021 0.0043
-3 8 6 0.1291 -0.0021
-3 8 7 0.0280 -0.0000
-3 8 8 -0.0665 0.0041
-3 8 9 -0.1200 0.0037
-3 8 10 -0.1194 -0.0018
-3 9 1 -0.1420 -0.0253
-3 9 2 -0.1226 -0.0320
-3 9 3 -0.0982 -0.0254
-3 9 4 -0.0721 -0.0131
-3 9 5 -0.0428 -0.0052
-3 9 6 -0.0105 -0.0053
-3 9 7 0.0204 -0.0090
-3 9 8 0.0445 -0.0092
-3 10 1 -0.0069 0.0463
-3 10 2 -0.0030 0.0345
-3 10 3 -0.0170 0.0094
-3 10 4 -0.0435 -0.0115
-3 10 5 -0.0675 -0.0161
-3 10 6 -0.0733 -0.0059
-2 -10 2 -0.3367 -0.0255
-2 -10 3 -0.2972 -0.0121
-2 -9 1 0.3567 0.0365
-2 -9 2 0.3344 0.0319
-2 -9 3 0.2964 0.0285
-2 -9 4 0.2389 0.0331
-2 -9 5 0.1630 0.0473
-2 -8 1 -0.1996 -0.0071
-2 -8 2 -0.1122 -0.0047
-2 -8 3 -0.0359 -0.0063
-2 -8 4 0.0324 -0.0198
-2 -8 5 0.0919 -0.0447
-2 -8 6 0.1342 -0.0698
-2 -8 7 0.1482 -0.0799
-2 -7 1 -0.1025 -0.0003
-2 -7 2 -0.2515 -0.0101
-2 -7 3 -0.3485 -0.0136
-2 -7 4 -0.4001 -0.0043
-2 -7 5 -0.4152 0.0156
-2 -7 6 -0.3962 0.0353
-2 -7 7 -0.3414 0.0431
-2 -7 8 -0.2549 0.0349
-2 -6 1 0.6209 -0.0087
-2 -6 2 0.7619 0.0032
-2 -6 3 0.7998 0.0084
-2 -6 4 0.7571 0.0048
-2 -6 5 0.6680 -0.0033
-2 -6 6 0.5591 -0.0083
-2 -6 7 0.4420 -0.0063
-2 -6 8 0.3202 -0.0002
-2 -6 9 0.2003 0.0035
-2 -5 1 -1.4298 0.0067
-2 -5 2 -1.4731 -0.0015
-2 -5 3 -1.3698 -0.0024
-2 -5 4 -1.1625 0.0029
-2 -5 5 -0.9118 0.0074
-2 -5 6 -0.6702 0.0051
-2 -5 7 -0.4667 -0.0032
-2 -5 8 -0.3074 -0.0101
-2 -5 9 -0.1880 -0.0084
-2 -5 10 -0.1046 0.0032
-2 -4 1 2.5053 -0.0060
-2 -4 2 2.3476 0.0039
-2 -4 3 2.0323 0.0060
-2 -4 4 1.6256 0.0013
-2 -4 5 1.2010 -0.0039
-2 -4 6 0.8173 -0.0035
-2 -4 7 0.5069 0.0029
-2 -4 8 0.2793 0.0099
-2 -4 9 0.1310 0.0116
-2 -4 10 0.0524 0.0062
-2 -4 11 0.0273 -0.0032
-2 -3 1 -3.6286 0.0230
-2 -3 2 -3.1776 0.0093
-2 -3 3 -2.5869 0.0003
-2 -3 4 -1.9603 -0.0024
-2 -3 5 -1.3810 -0.0016
-2 -3 6 -0.8952 -0.0022
-2 -3 7 -0.5154 -0.0069
-2 -3 8 -0.2374 -0.0151
-2 -3 9 -0.0558 -0.0238
-2 -3 10 0.0357 -0.0294
-2 -3 11 0.0532 -0.0294
-2 -3 12 0.0280 -0.0233
-2 -2 1 4.2866 -0.0288
-2 -2 2 3.5578 -0.0205
-2 -2 3 2.7133 -0.0129
-2 -2 4 1.8988 -0.0080
-2 -2 5 1.2147 -0.0052
-2 -2 6 0.6978 -0.0019
-2 -2 7 0.3345 0.0046
-2 -2 8 0.0926 0.0154
-2 -2 9 -0.0534 0.0287
-2 -2 10 -0.1186 0.0401
-2 -2 11 -0.1206 0.0442
-2 -2 12 -0.0874 0.0381
-2 -1 1 -3.8377 0.0020
-2 -1 2 -2.9991 0.0029
-2 -1 3 -2.0892 0.0054
-2 -1 4 -1.2604 0.0084
-2 -1 5 -0.6140 0.0103
-2 -1 6 -0.1804 0.0095
-2 -1 7 0.0672 0.0049
-2 -1 8 0.1804 -0.0033
-2 -1 9 0.2070 -0.0127
-2 -1 10 0.1822 -0.0196
-2 -1 11 0.1343 -0.0205
-2 -1 12 0.0883 -0.0146
-2 0 1 2.0771 0.0186
-2 0 2 1.3389 0.0176
-2 0 3 0.6337 0.0122
-2 0 4 0.0666 0.0051
-2 0 5 -0.3077 -0.0006
-2 0 6 -0.4912 -0.0033
-2 0 7 -0.5251 -0.0037
-2 0 8 -0.4632 -0.0038
-2 0 9 -0.3530 -0.0062
-2 0 10 -0.2321 -0.0117
-2 0 11 -0.1298 -0.0186
-2 0 12 -0.0650 -0.0233
-2 0 13 -0.0396 -0.0226
-2 1 1 0.3414 0.0035
-2 1 2 0.8692 -0.0011
-2 1 3 1.2171 -0.0032
-2 1 4 1.3458 -0.0039
-2 1 5 1.2795 -0.0049
-2 1 6 1.0872 -0.0068
-2 1 7 0.8472 -0.0079
-2 1 8 0.6170 -0.0047
-2 1 9 0.4237 0.0049
-2 1 10 0.2737 0.0194
-2 1 11 0.1663 0.0330
-2 1 12 0.0987 0.0380
-2 1 13 0.0617 0.0304
-2 2 1 -2.2787 -0.0344
-2 2 2 -2.5904 -0.0304
-2 2 3 -2.6235 -0.0236
-2 2 4 -2.3757 -0.0157
-2 2 5 -1.9264 -0.0073
-2 2 6 -1.4057 0.0014
-2 2 7 -0.9392 0.0089
-2 2 8 -0.6012 0.0121
-2 2 9 -0.4004 0.0081
-2 2 10 -0.2993 -0.0029
-2 2 11 -0.2465 -0.0158
-2 2 13 -0.1463 -0.0183
-2 3 1 2.9985 0.0255
-2 3 2 3.1092 0.0266
-2 3 3 2.9583 0.0232
-2 3 4 2.5462 0.0182
-2 3 5 1.9539 0.0136
-2 3 6 1.3210 0.0090
-2 3 7 0.7898 0.0029
-2 3 8 0.4469 -0.0039
-2 3 9 0.2967 -0.0082
-2 3 10 0.2759 -0.0070
-2 3 11 0.2959 -0.0005
-2 3 12 0.2865 0.0070
-2 4 1 -2.6162 0.0067
-2 4 2 -2.5421 0.0054
-2 4 3 -2.3073 0.0063
-2 4 4 -1.9116 0.0060
-2 4 5 -1.4056 0.0023
-2 4 6 -0.8882 -0.0033
-2 4 7 -0.4685 -0.0072
-2 4 8 -0.2176 -0.0075
-2 4 9 -0.1388 -0.0062
-2 4 10 -0.1734 -0.0073
-2 4 11 -0.2353 -0.0125
-2 5 1 1.7410 -0.0155
-2 5 2 1.5417 -0.0179
-2 5 3 1.2841 -0.0209
-2 5 4 0.9801 -0.0208
-2 5 5 0.6573 -0.0162
-2 5 6 0.3616 -0.0090
-2 5 7 0.1408 -0.0018
-2 5 8 0.0220 0.0051
-2 5 9 -0.0011 0.0145
-2 5 10 0.0354 0.0281
-2 5 11 0.0837 0.0435
-2 5 12 0.1054 0.0542
-2 6 1 -0.8874 -0.0025
-2 6 2 -0.6650 0.0024
-2 6 3 -0.4406 0.0073
-2 6 4 -0.2406 0.0084
-2 6 5 -0.0887 0.0071
-2 6 6 0.0022 0.0072
-2 6 7 0.0377 0.0094
-2 6 8 0.0396 0.0081
-2 6 9 0.0329 -0.0042
-2 6 10 0.0323 -0.0291
-2 6 11 0.0379 -0.0578
-2 6 12 0.0413 -0.0762
-2 7 1 0.2601 0.0168
-2 7 2 0.1033 0.0084
-2 7 3 -0.0396 0.0027
-2 7 4 -0.1415 0.0041
-2 7 5 -0.1759 0.0069
-2 7 6 -0.1387 0.0025
-2 7 7 -0.0593 -0.0100
-2 7 8 0.0128 -0.0208
-2 7 9 0.0381 -0.0166
-2 7 10 0.0101 0.0067
-2 7 11 -0.0431 0.0391
-2 8 1 0.1199 -0.0102
-2 8 2 0.1751 0.0023
-2 8 3 0.2171 0.0075
-2 8 4 0.2350 0.0014
-2 8 5 0.2084 -0.0067
-2 8 6 0.1315 -0.0048
-2 8 7 0.0277 0.0100
-2 8 8 -0.0597 0.0270
-2 8 9 -0.0946 0.0319
-2 8 10 -0.0711 0.0184
-2 9 1 -0.2737 -0.0206
-2 9 2 -0.2463 -0.0283
-2 9 3 -0.2047 -0.0239
-2 9 4 -0.1612 -0.0086
-2 9 5 -0.1145 0.0051
-2 9 6 -0.0615 0.0059
-2 9 7 -0.0067 -0.0071
-2 9 8 0.0370 -0.0232
-2 9 9 0.0578 -0.0303
-2 10 1 0.2413 0.0696
-2 10 2 0.1878 0.0638
-2 10 3 0.1120 0.0394
-2 10 4 0.0407 0.0086
-2 10 5 -0.0058 -0.0122
-2 10 6 -0.0204 -0.0144
-2 10 7 -0.0103 -0.0030
-2 11 1 -0.1099 -0.1042
-2 11 2 -0.0837 -0.0911
-2 11 3 -0.0304 -0.0541
-1 -10 1 -0.4541 0.0540
-1 -10 2 -0.3901 0.0575
-1 -10 3 -0.3014 0.0519
-1 -10 4 -0.2101 0.0428
-1 -9 1 0.7280 -0.0123
-1 -9 2 0.6776 -0.0175
-1 -9 3 0.5681 -0.0166
-1 -9 4 0.4240 -0.0080
-1 -9 5 0.2700 0.0099
-1 -8 1 -0.7764 -0.0047
-1 -8 2 -0.6780 0.0004
-1 -8 3 -0.5279 0.0021
-1 -8 4 -0.3524 -0.0085
-1 -8 5 -0.1820 -0.0349
-1 -8 6 -0.0424 -0.0691
-1 -8 7 0.0519 -0.0935
-1 -7 1 0.6112 0.0036
-1 -7 2 0.4237 -0.0055
-1 -7 3 0.2304 -0.0128
-1 -7 4 0.0546 -0.0062
-1 -7 5 -0.0815 0.0186
-1 -7 6 -0.1624 0.0521
-1 -7 7 -0.1858 0.0755
-1 -7 8 -0.1636 0.0745
-1 -7 9 -0.1175 0.0492
-1 -6 1 -0.2078 -0.0029
-1 -6 2 0.0320 0.0080
-1 -6 3 0.2036 0.0184
-1 -6 4 0.3020 0.0185
-1 -6 5 0.3369 0.0058
-1 -6 6 0.3232 -0.0126
-1 -6 7 0.2755 -0.0252
-1 -6 8 0.2069 -0.0251
-1 -6 9 0.1314 -0.0148
-1 -6 10 0.0649 -0.0031
-1 -5 1 -0.5990 -0.0002
-1 -5 2 -0.8033 -0.0081
-1 -5 3 -0.8517 -0.0144
-1 -5 4 -0.7686 -0.0148
-1 -5 5 -0.6117 -0.0107
-1 -5 6 -0.4432 -0.0070
-1 -5 7 -0.3042 -0.0066
-1 -5 8 -0.2056 -0.0071
-1 -5 9 -0.1378 -0.0026
-1 -5 10 -0.0882 0.0098
-1 -5 11 -0.0516 0.0263
-1 -4 1 1.9850 -0.0018
-1 -4 2 2.0408 0.0088
-1 -4 3 1.8688 0.0145
-1 -4 4 1.5242 0.0138
-1 -4 5 1.1049 0.0105
-1 -4 6 0.7125 0.0096
-1 -4 7 0.4153 0.0109
-1 -4 8 0.2309 0.0085
-1 -4 9 0.1374 -0.0041
-1 -4 10 0.0978 -0.0270
-1 -4 11 0.0816 -0.0522
-1 -3 1 -3.8827 0.0261
-1 -3 2 -3.6564 0.0061
-1 -3 3 -3.1658 -0.0094
-1 -3 4 -2.5071 -0.0163
-1 -3 5 -1.8029 -0.0166
-1 -3 6 -1.1665 -0.0143
-1 -3 7 -0.6705 -0.0105
-1 -3 8 -0.3368 -0.0027
-1 -3 9 -0.1471 0.0121
-1 -3 10 -0.0633 0.0328
-1 -3 11 -0.0440 0.0534
-1 -3 12 -0.0520 0.0663
-1 -2 1 5.7631 -0.0502
-1 -2 2 5.1685 -0.0305
-1 -2 3 4.2980 -0.0101
-1 -2 4 3.3060 0.0049
-1 -2 5 2.3411 0.0125
-1 -2 6 1.5113 0.0137
-1 -2 7 0.8689 0.0099
-1 -2 8 0.4193 0.0020
-1 -2 9 0.1402 -0.0093
-1 -2 10 -0.0009 -0.0223
-1 -2 11 -0.0426 -0.0347
-1 -2 12 -0.0283 -0.0438
-1 -1 1 -6.7048 0.0275
-1 -1 2 -5.8100 0.0243
-1 -1 3 -4.6483 0.0179
-1 -1 4 -3.4223 0.0107
-1 -1 5 -2.3059 0.0047
-1 -1 6 -1.4045 0.0013
-1 -1 7 -0.7473 0.0010
-1 -1 8 -0.3112 0.0036
-1 -1 9 -0.0523 0.0081
-1 -1 10 0.0727 0.0137
-1 -1 11 0.1047 0.0202
-1 -1 12 0.0852 0.0270
-1 0 1 5.9533 0.0277
-1 0 2 4.9717 0.0167
-1 0 3 3.7886 0.0044
-1 0 4 2.6016 -0.0053
-1 0 5 1.5747 -0.0106
-1 0 6 0.7996 -0.0121
-1 0 7 0.2898 -0.0122
-1 0 8 0.0036 -0.0127
-1 0 9 -0.1215 -0.0144
-1 0 10 -0.1454 -0.0175
-1 0 11 -0.1175 -0.0218
-1 0 12 -0.0763 -0.0263
-1 0 13 -0.0467 -0.0291
-1 1 1 -3.6261 -0.0452
-1 1 2 -2.7692 -0.0369
-1 1 3 -1.8580 -0.0234
-1 1 4 -1.0297 -0.0103
-1 1 5 -0.3822 -0.0013
-1 1 6 0.0450 0.0032
-1 1 7 0.2665 0.0056
-1 1 8 0.3311 0.0086
-1 1 9 0.2967 0.0135
-1 1 10 0.2156 0.0199
-1 1 11 0.1283 0.0258
-1 1 12 0.0617 0.0286
-1 1 13 0.0259 0.0262
-1 2 1 0.7855 0.0059
-1 2 2 0.1515 0.0066
-1 2 3 -0.3609 0.0060
-1 2 4 -0.6842 0.0060
-1 2 5 -0.8102 0.0077
-1 2 6 -0.7815 0.0100
-1 2 7 -0.6650 0.0109
-1 2 8 -0.5215 0.0087
-1 2 9 -0.3875 0.0026
-1 2 10 -0.2756 -0.0062
-1 2 11 -0.1863 -0.0149
-1 2 12 -0.1169 -0.0194
-1 2 13 -0.0645 -0.0167
-1 3 1 1.3377 0.0284
-1 3 2 1.7371 0.0275
-1 3 3 1.9083 0.0207
-1 3 4 1.8241 0.0101
-1 3 5 1.5348 -0.0007
-1 3 6 1.1484 -0.0093
-1 3 7 0.7827 -0.0149
-1 3 8 0.5174 -0.0179
-1 3 9 0.3699 -0.0179
-1 3 10 0.3059 -0.0138
-1 3 11 0.2719 -0.0061
-1 3 12 0.2265 0.0020
-1 3 13 0.1559 0.0060
-1 4 1 -2.1994 -0.0141
-1 4 2 -2.3718 -0.0181
-1 4 3 -2.3228 -0.0143
-1 4 4 -2.0402 -0.0066
-1 4 5 -1.5838 -0.0004
-1 4 6 -1.0729 0.0024
-1 4 7 -0.6383 0.0044
-1 4 8 -0.3657 0.0087
-1 4 9 -0.2632 0.0150
-1 4 10 -0.2710 0.0189
-1 4 11 -0.3027 0.0160
-1 4 12 -0.2912 0.0067
-1 4 13 -0.2164 -0.0039
-1 5 1 2.0640 -0.0172
-1 5 2 2.0314 -0.0136
-1 5 3 1.8570 -0.0139
-1 5 4 1.5424 -0.0142
-1 5 5 1.1307 -0.0099
-1 5 6 0.7063 -0.0015
-1 5 7 0.3646 0.0051
-1 5 8 0.1682 0.0050
-1 5 9 0.1193 -0.0008
-1 5 10 0.1635 -0.0060
-1 5 11 0.2229 -0.0045
-1 5 12 0.2357 0.0042
-1 5 13 0.1824 0.0146
-1 6 1 -1.4952 0.0204
-1 6 2 -1.3179 0.0230
-1 6 3 -1.0854 0.0258
-1 6 4 -0.8198 0.0236
-1 6 5 -0.5488 0.0143
-1 6 6 -0.3087 0.0023
-1 6 7 -0.1339 -0.0054
-1 6 8 -0.0416 -0.0058
-1 6 9 -0.0231 -0.0030
-1 6 10 -0.0489 -0.0043
-1 6 11 -0.0822 -0.0131
-1 6 12 -0.0953 -0.0250
-1 7 1 0.8853 0.0048
-1 7 2 0.6573 -0.0067
-1 7 3 0.4301 -0.0162
-1 7 4 0.2411 -0.0162
-1 7 5 0.1128 -0.0080
-1 7 6 0.0479 -0.0005
-1 7 7 0.0292 -0.0016
-1 7 8 0.0291 -0.0097
-1 7 9 0.0246 -0.0145
-1 7 10 0.0089 -0.0069
-1 7 11 -0.0099 0.0127
-1 7 12 -0.0188 0.0327
-1 8 1 -0.3711 -0.0331
-1 8 2 -0.1921 -0.0131
-1 8 3 -0.0326 0.0031
-1 8 4 0.0724 0.0061
-1 8 5 0.1022 0.0006
-1 8 6 0.0647 -0.0001
-1 8 7 -0.0039 0.0120
-1 8 8 -0.0574 0.0313
-1 8 9 -0.0659 0.0426
-1 8 10 -0.0319 0.0344
-1 8 11 0.0158 0.0094
-1 9 1 -0.0196 0.0403
-1 9 2 -0.0844 0.0213
-1 9 3 -0.1329 0.0078
-1 9 4 -0.1523 0.0070
-1 9 5 -0.1323 0.0108
-1 9 6 -0.0777 0.0053
-1 9 7 -0.0112 -0.0154
-1 9 8 0.0376 -0.0423
-1 9 9 0.0502 -0.0585
-1 10 1 0.2456 -0.0073
-1 10 2 0.2073 -0.0044
-1 10 3 0.1531 -0.0110
-1 10 4 0.0998 -0.0247
-1 10 5 0.0583 -0.0328
-1 10 6 0.0330 -0.0237
-1 10 7 0.0229 0.0021
-1 10 8 0.0229 0.0316
-1 11 1 -0.2661 -0.0547
-1 11 2 -0.2041 -0.0392
-1 11 3 -0.1156 -0.0069
-1 11 4 -0.0331 0.0278
-1 11 5 0.0142 0.0466
0 -11 1 -0.1593 -0.0490
0 -10 1 -0.1468 0.0844
0 -10 2 -0.1305 0.0632
0 -10 3 -0.1055 0.0390
0 -10 4 -0.0773 0.0264
0 -9 1 0.6248 -0.0692
0 -9 2 0.6060 -0.0526
0 -9 3 0.5229 -0.0320
0 -9 4 0.3970 -0.0182
0 -9 5 0.2539 -0.0117
0 -9 6 0.1177 -0.0054
0 -8 1 -1.0085 0.0305
0 -8 2 -0.9521 0.0244
0 -8 3 -0.7947 0.0151
0 -8 4 -0.5757 0.0031
0 -8 5 -0.3458 -0.0147
0 -8 6 -0.1479 -0.0385
0 -8 7 -0.0051 -0.0611
0 -8 8 0.0802 -0.0709
0 -7 1 1.1783 -0.0006
0 -7 2 1.0254 -0.0063
0 -7 3 0.7797 -0.0114
0 -7 4 0.4939 -0.0061
0 -7 5 0.2326 0.0165
0 -7 6 0.0446 0.0516
0 -7 7 -0.0559 0.0824
0 -7 8 -0.0883 0.0905
0 -7 9 -0.0864 0.0693
0 -6 1 -1.1195 -0.0126
0 -6 2 -0.8555 -0.0019
0 -6 3 -0.5568 0.0117
0 -6 4 -0.2705 0.0154
0 -6 5 -0.0465 0.0006
0 -6 6 0.0836 -0.0275
0 -6 7 0.1210 -0.0525
0 -6 8 0.0962 -0.0580
0 -6 9 0.0510 -0.0398
0 -6 10 0.0180 -0.0086
0 -5 1 0.6972 0.0072
0 -5 2 0.3688 0.0030
0 -5 3 0.1074 -0.0055
0 -5 4 -0.0658 -0.0100
0 -5 5 -0.1510 -0.0058
0 -5 6 -0.1662 0.0039
0 -5 7 -0.1394 0.0109
0 -5 8 -0.0972 0.0093
0 -5 9 -0.0575 0.0005
0 -5 10 -0.0289 -0.0084
0 -5 11 -0.0140 -0.0112
0 -4 1 0.3870 0.0069
0 -4 2 0.6888 0.0054
0 -4 3 0.8039 0.0044
0 -4 4 0.7444 0.0021
0 -4 5 0.5740 -0.0003
0 -4 6 0.3778 0.0009
0 -4 7 0.2246 0.0067
0 -4 8 0.1413 0.0130
0 -4 9 0.1134 0.0130
0 -4 10 0.1073 0.0024
0 -4 11 0.0974 -0.0152
0 -4 12 0.0769 -0.0305
0 -3 1 -2.3366 0.0022
0 -3 2 -2.4720 -0.0054
0 -3 3 -2.3215 -0.0089
0 -3 4 -1.9345 -0.0074
0 -3 5 -1.4246 -0.0047
0 -3 6 -0.9268 -0.0052
0 -3 7 -0.5447 -0.0088
0 -3 8 -0.3159 -0.0097
0 -3 9 -0.2137 -0.0009
0 -3 10 -0.1800 0.0189
0 -3 11 -0.1628 0.0429
0 -3 12 -0.1368 0.0600
0 -2 1 4.8785 -0.0405
0 -2 2 4.6898 -0.0201
0 -2 3 4.1510 -0.0015
0 -2 4 3.3676 0.0102
0 -2 5 2.4909 0.0154
0 -2 6 1.6738 0.0163
0 -2 7 1.0249 0.0134
0 -2 8 0.5833 0.0047
0 -2 9 0.3257 -0.0114
0 -2 10 0.1962 -0.0328
0 -2 11 0.1378 -0.0530
0 -2 13 0.0866 -0.0635
0 -1 1 -7.1102 0.0554
0 -1 2 -6.5355 0.0405
0 -1 3 -5.5737 0.0213
0 -1 4 -4.4015 0.0033
0 -1 5 -3.2091 -0.0100
0 -1 6 -2.1525 -0.0163
0 -1 7 -1.3213 -0.0143
0 -1 8 -0.7345 -0.0040
0 -1 9 -0.3622 0.0123
0 -1 10 -0.1538 0.0300
0 -1 11 -0.0578 0.0438
0 -1 12 -0.0281 0.0501
0 -1 13 -0.0253 0.0480
0 0 1 7.9042 -0.0084
0 0 2 7.0577 -0.0146
0 0 3 5.8313 -0.0163
0 0 4 4.4462 -0.0127
0 0 5 3.1177 -0.0054
0 0 6 2.0006 0.0017
0 0 7 1.1628 0.0041
0 0 8 0.5965 -0.0001
0 0 9 0.2517 -0.0092
0 0 10 0.0691 -0.0195
0 0 11 -0.0044 -0.0274
0 0 12 -0.0149 -0.0311
0 0 13 -0.0027 -0.0304
0 1 0 -7.1823 -0.0602
0 1 1 -6.7282 -0.0523
0 1 2 -5.8252 -0.0342
0 1 3 -4.6352 -0.0136
0 1 4 -3.3621 0.0014
0 1 5 -2.1968 0.0074
0 1 6 -1.2681 0.0064
0 1 7 -0.6211 0.0037
0 1 8 -0.2304 0.0032
0 1 9 -0.0340 0.0058
0 1 10 0.0351 0.0098
0 1 11 0.0326 0.0133
0 1 12 0.0023 0.0154
0 1 13 -0.0242 0.0158
0 2 0 4.6823 0.0544
0 2 1 4.1400 0.0554
0 2 2 3.3503 0.0434
0 2 3 2.4489 0.0254
0 2 4 1.5771 0.0099
0 2 5 0.8488 0.0019
0 2 6 0.3248 0.0008
0 2 7 0.0088 0.0026
0 2 8 -0.1372 0.0036
0 2 9 -0.1666 0.0028
0 2 10 -0.1292 0.0008
0 2 11 -0.0640 -0.0015
0 2 12 -0.0006 -0.0036
0 2 13 0.0411 -0.0046
0 3 0 -1.9434 -0.0090
0 3 1 -1.3831 -0.0108
0 3 2 -0.7770 -0.0076
0 3 3 -0.2405 -0.0033
0 3 4 0.1471 -0.0019
0 3 5 0.3601 -0.0042
0 3 6 0.4241 -0.0084
0 3 7 0.3950 -0.0120
0 3 8 0.3280 -0.0139
0 3 9 0.2563 -0.0145
0 3 10 0.1886 -0.0137
0 3 11 0.1221 -0.0111
0 3 12 0.0576 -0.0069
0 3 13 0.0029 -0.0029
0 4 0 -0.0527 -0.0109
0 4 1 -0.5328 -0.0165
0 4 2 -0.9369 -0.0196
0 4 3 -1.1682 -0.0168
0 4 4 -1.1854 -0.0088
0 4 5 -1.0185 0.0002
0 4 6 -0.7544 0.0065
0 4 7 -0.4959 0.0098
0 4 8 -0.3145 0.0129
0 4 9 -0.2254 0.0175
0 4 10 -0.1955 0.0220
0 4 11 -0.1765 0.0223
0 4 12 -0.1371 0.0167
0 4 13 -0.0759 0.0080
0 5 0 1.0492 -0.0028
0 5 1 1.3607 0.0062
0 5 2 1.5568 0.0121
0 5 3 1.5757 0.0105
0 5 4 1.3997 0.0041
0 5 5 1.0742 -0.0005
0 5 6 0.6971 0.0003
0 5 7 0.3773 0.0032
0 5 8 0.1849 0.0016
0 5 9 0.1241 -0.0070
0 5 10 0.1429 -0.0185
0 5 11 0.1720 -0.0248
0 5 12 0.1635 -0.0214
0 5 13 0.1098 -0.0111
0 6 0 -1.3160 0.0135
0 6 1 -1.4240 0.0081
0 6 2 -1.4255 0.0040
0 6 3 -1.3075 0.0044
0 6 4 -1.0760 0.0053
0 6 5 -0.7696 0.0009
0 6 6 -0.4562 -0.0091
0 6 7 -0.2077 -0.0179
0 6 8 -0.0675 -0.0176
0 6 9 -0.0324 -0.0066
0 6 10 -0.0609 0.0079
0 6 11 -0.0992 0.0166
0 6 12 -0.1090 0.0151
0 7 0 1.2168 -0.0019
0 7 1 1.1494 -0.0037
0 7 2 1.0025 -0.0075
0 7 3 0.8072 -0.0110
0 7 4 0.5939 -0.0082
0 7 5 0.3911 0.0033
0 7 6 0.2237 0.0182
0 7 7 0.1065 0.0264
0 7 8 0.0404 0.0217
0 7 9 0.0142 0.0076
0 7 10 0.0116 -0.0054
0 7 11 0.0185 -0.0087
0 7 12 0.0254 -0.0027
0 8 0 -0.9504 -0.0289
0 8 1 -0.7951 -0.0168
0 8 2 -0.5843 0.0012
0 8 3 -0.3713 0.0137
0 8 4 -0.2027 0.0115
0 8 5 -0.1034 -0.0036
0 8 6 -0.0687 -0.0191
0 8 7 -0.0695 -0.0218
0 8 8 -0.0708 -0.0088
0 8 9 -0.0526 0.0099
0 8 10 -0.0186 0.0197
0 8 11 0.0111 0.0139
0 9 0 0.5679 0.0687
0 9 1 0.4422 0.0474
0 9 2 0.2760 0.0161
0 9 3 0.1143 -0.0067
0 9 4 0.0021 -0.0096
0 9 5 -0.0367 0.0024
0 9 6 -0.0122 0.0129
0 9 7 0.0375 0.0076
0 9 8 0.0703 -0.0129
0 9 9 0.0650 -0.0343
0 9 10 0.0310 -0.0408
0 10 0 -0.1449 -0.0871
0 10 1 -0.1174 -0.0685
0 10 2 -0.0674 -0.0404
0 10 3 -0.0112 -0.0202
0 10 4 0.0293 -0.0159
0 10 5 0.0399 -0.0202
0 10 6 0.0239 -0.0182
0 10 7 -0.0012 -0.0012
0 10 8 -0.0159 0.0253
0 11 0 -0.1387 0.0527
0 11 1 -0.1045 0.0474
0 11 2 -0.0644 0.0421
0 11 3 -0.0263 0.0443
0 11 4 0.0023 0.0516
0 11 5 0.0150 0.0532
1 -11 0 -0.2813 0.0522
1 -10 0 0.2501 0.0101
1 -10 1 0.2116 0.0021
1 -10 2 0.1379 -0.0170
1 -10 3 0.0530 -0.0342
1 -10 4 -0.0146 -0.0337
1 -9 0 0.0547 -0.0477
1 -9 1 0.1349 -0.0322
1 -9 2 0.2115 -0.0002
1 -9 4 0.2750 0.0303
1 -9 5 0.2347 0.0052
1 -9 6 0.1582 -0.0321
1 -8 0 -0.5345 0.0407
1 -8 1 -0.6537 0.0276
1 -8 2 -0.7073 0.0010
1 -8 3 -0.6834 -0.0214
1 -8 4 -0.5856 -0.0251
1 -8 5 -0.4361 -0.0100
1 -8 6 -0.2707 0.0120
1 -8 7 -0.1240 0.0266
1 -8 8 -0.0176 0.0282
1 -7 0 1.0686 -0.0094
1 -7 1 1.1623 -0.0044
1 -7 2 1.1359 0.0043
1 -7 3 0.9888 0.0094
1 -7 4 0.7579 0.0088
1 -7 5 0.5050 0.0074
1 -7 7 0.1424 0.0175
1 -7 8 0.0582 0.0207
1 -7 9 0.0113 0.0133
1 -6 0 -1.5906 -0.0200
1 -6 1 -1.5711 -0.0182
1 -6 2 -1.4135 -0.0102
1 -6 3 -1.1308 0.0028
1 -6 4 -0.7830 0.0124
1 -6 5 -0.4582 0.0091
1 -6 6 -0.2298 -0.0083
1 -6 7 -0.1202 -0.0289
1 -6 8 -0.0963 -0.0373
1 -6 9 -0.0998 -0.0246
1 -6 10 -0.0858 0.0034
1 -5 0 1.9713 0.0233
1 -5 1 1.7674 0.0248
1 -5 2 1.4648 0.0163
1 -5 3 1.0931 0.0003
1 -5 4 0.7105 -0.0133
1 -5 5 0.3897 -0.0149
1 -5 6 0.1851 -0.0042
1 -5 7 0.1038 0.0090
1 -5 8 0.1054 0.0124
1 -5 9 0.1303 0.0005
1 -5 10 0.1331 -0.0205
1 -5 11 0.1007 -0.0383
1 -4 0 -1.8688 0.0040
1 -4 1 -1.4589 -0.0062
1 -4 2 -1.0400 -0.0111
1 -4 3 -0.6667 -0.0100
1 -4 4 -0.3768 -0.0063
1 -4 5 -0.1877 -0.0031
1 -4 6 -0.0923 0.0000
1 -4 7 -0.0617 0.0062
1 -4 8 -0.0594 0.0170
1 -4 9 -0.0585 0.0292
1 -4 10 -0.0494 0.0369
1 -4 11 -0.0343 0.0360
1 -3 0 0.8036 -0.0236
1 -3 1 0.2588 -0.0149
1 -3 2 -0.1810 -0.0041
1 -3 3 -0.4419 0.0074
1 -3 4 -0.5106 0.0166
1 -3 5 -0.4336 0.0194
1 -3 6 -0.2938 0.0123
1 -3 7 -0.1716 -0.0040
1 -3 8 -0.1094 -0.0228
1 -3 9 -0.1009 -0.0347
1 -3 10 -0.1100 -0.0335
1 -3 11 -0.1045 -0.0207
1 -3 12 -0.0773 -0.0047
1 -2 0 1.4277 -0.0029
1 -2 1 1.9475 0.0010
1 -2 2 2.2344 0.0023
1 -2 3 2.2331 -0.0015
1 -2 4 1.9665 -0.0082
1 -2 5 1.5314 -0.0123
1 -2 6 1.0629 -0.0085
1 -2 7 0.6780 0.0027
1 -2 8 0.4308 0.0149
1 -2 9 0.3042 0.0200
1 -2 10 0.2410 0.0141
1 -2 11 0.1889 0.0007
1 -2 12 0.1287 -0.0119
1 -2 13 0.0701 -0.0168
1 -1 0 -4.2848 0.0443
1 -1 1 -4.6285 0.0351
1 -1 2 -4.5956 0.0222
1 -1 3 -4.1966 0.0109
1 -1 4 -3.5173 0.0033
1 -1 5 -2.6999 -0.0020
1 -1 6 -1.9006 -0.0068
1 -1 7 -1.2400 -0.0108
1 -1 8 -0.7684 -0.0113
1 -1 9 -0.4680 -0.0063
1 -1 10 -0.2847 0.0029
1 -1 11 -0.1673 0.0118
1 -1 12 -0.0876 0.0157
1 -1 13 -0.0370 0.0130
1 0 0 6.5565 -0.0339
1 0 1 6.6740 -0.0341
1 0 2 6.2941 -0.0291
1 0 3 5.5010 -0.0204
1 0 4 4.4517 -0.0095
1 0 5 3.3325 0.0019
1 0 6 2.3087 0.0111
1 0 7 1.4836 0.0148
1 0 8 0.8856 0.0114
1 0 9 0.4866 0.0028
1 0 10 0.2364 -0.0063
1 0 11 0.0906 -0.0111
1 0 12 0.0178 -0.0094
1 1 0 -7.1590 -0.0251
1 1 1 -7.0797 -0.0165
1 1 2 -6.4827 -0.0042
1 1 3 -5.4884 0.0063
1 1 4 -4.2874 0.0101
1 1 5 -3.0842 0.0061
1 1 6 -2.0403 -0.0020
1 1 7 -1.2383 -0.0081
1 1 8 -0.6823 -0.0085
1 1 9 -0.3285 -0.0043
1 1 10 -0.1228 0.0002
1 1 11 -0.0214 0.0014
1 1 12 0.0091 -0.0012
1 1 13 0.0009 -0.0052
1 2 0 5.9637 0.0606
1 2 1 5.7219 0.0561
1 2 2 5.0756 0.0380
1 2 3 4.1428 0.0149
1 2 4 3.0915 -0.0028
1 2 5 2.0924 -0.0093
1 2 6 1.2704 -0.0064
1 2 7 0.6777 -0.0000
1 2 8 0.3004 0.0045
1 2 9 0.0897 0.0062
1 2 10 -0.0059 0.0069
1 2 11 -0.0257 0.0081
1 2 12 -0.0012 0.0093
1 2 13 0.0367 0.0090
1 3 0 -3.8012 -0.0414
1 3 1 -3.4295 -0.0437
1 3 2 -2.8390 -0.0318
1 3 3 -2.1371 -0.0126
1 3 4 -1.4412 0.0036
1 3 5 -0.8483 0.0107
1 3 6 -0.4107 0.0090
1 3 7 -0.1309 0.0031
1 3 8 0.0224 -0.0029
1 3 9 0.0884 -0.0074
1 3 10 0.0957 -0.0105
1 3 11 0.0625 -0.0121
1 3 12 0.0071 -0.0109
1 3 13 -0.0462 -0.0068
1 4 0 1.7088 0.0108
1 4 1 1.2782 0.0123
1 4 2 0.7934 0.0058
1 4 3 0.3567 -0.0037
1 4 4 0.0408 -0.0102
1 4 5 -0.1310 -0.0114
1 4 6 -0.1847 -0.0086
1 4 7 -0.1746 -0.0044
1 4 8 -0.1509 0.0001
1 4 9 -0.1351 0.0053
1 4 10 -0.1196 0.0103
1 4 11 -0.0879 0.0126
1 4 12 -0.0366 0.0101
1 4 13 0.0173 0.0032
1 5 0 -0.2651 -0.0037
1 5 1 0.1240 -0.0014
1 5 2 0.4689 0.0039
1 5 3 0.6808 0.0071
1 5 4 0.7171 0.0064
1 5 5 0.6002 0.0044
1 5 6 0.4055 0.0046
1 5 7 0.2231 0.0070
1 5 8 0.1125 0.0076
1 5 9 0.0789 0.0030
1 5 10 0.0845 -0.0055
1 5 11 0.0831 -0.0125
1 5 12 0.0535 -0.0128
1 5 13 0.0069 -0.0064
1 6 0 -0.4878 0.0064
1 6 1 -0.7544 0.0027
1 6 2 -0.9399 -0.0018
1 6 3 -0.9862 -0.0014
1 6 4 -0.8750 0.0025
1 6 5 -0.6439 0.0036
1 6 6 -0.3741 -0.0026
1 6 7 -0.1529 -0.0131
1 6 8 -0.0309 -0.0198
1 6 9 -0.0029 -0.0162
1 6 10 -0.0230 -0.0039
1 6 11 -0.0403 0.0091
1 6 12 -0.0298 0.0152
1 7 0 0.7703 -0.0060
1 7 1 0.8770 -0.0023
1 7 2 0.9069 0.0009
1 7 3 0.8430 -0.0005
1 7 4 0.6899 -0.0029
1 7 5 0.4809 0.0004
1 7 6 0.2694 0.0119
1 7 7 0.1054 0.0259
1 7 8 0.0124 0.0328
1 7 9 -0.0190 0.0273
1 7 10 -0.0183 0.0130
1 7 11 -0.0131 -0.0013
1 7 12 -0.0157 -0.0090
1 8 0 -0.8078 0.0079
1 8 1 -0.7703 0.0096
1 8 2 -0.6750 0.0120
1 8 3 -0.5423 0.0134
1 8 4 -0.3987 0.0086
1 8 5 -0.2694 -0.0055
1 8 6 -0.1707 -0.0246
1 8 7 -0.1037 -0.0387
1 8 8 -0.0576 -0.0397
1 8 9 -0.0199 -0.0281
1 8 10 0.0132 -0.0125
1 9 0 0.7029 0.0006
1 9 1 0.6031 -0.0173
1 9 2 0.4519 -0.0353
1 9 3 0.2906 -0.0431
1 9 4 0.1625 -0.0326
1 9 5 0.0929 -0.0065
1 9 6 0.0774 0.0220
1 9 7 0.0860 0.0374
1 9 8 0.0842 0.0330
1 9 9 0.0558 0.0157
1 10 0 -0.4665 -0.0352
1 10 1 -0.4119 -0.0024
1 10 2 -0.3005 0.0321
1 10 3 -0.1685 0.0511
1 10 4 -0.0612 0.0448
1 10 5 -0.0085 0.0186
1 10 6 -0.0085 -0.0096
1 10 7 -0.0324 -0.0225
1 10 8 -0.0466 -0.0155
1 11 0 0.1677 0.0654
1 11 1 0.1953 0.0375
1 11 2 0.1745 0.0065
1 11 3 0.1196 -0.0124
1 11 4 0.0586 -0.0122
1 11 5 0.0155 0.0009
2 -10 0 0.2486 -0.0587
2 -10 1 0.2007 -0.0438
2 -10 2 0.1103 -0.0371
2 -10 3 0.0094 -0.0394
2 -10 4 -0.0661 -0.0406
2 -9 0 -0.2617 0.0122
2 -9 1 -0.1893 0.0165
2 -9 2 -0.0616 0.0355
2 -9 3 0.0830 0.0550
2 -9 4 0.1912 0.0546
2 -9 5 0.2270 0.0242
2 -9 6 0.1937 -0.0261
2 -8 0 0.0423 0.0149
2 -8 1 -0.0724 0.0001
2 -8 2 -0.2187 -0.0303
2 -8 3 -0.3594 -0.0558
2 -8 4 -0.4425 -0.0537
2 -8 5 -0.4350 -0.0165
2 -8 6 -0.3459 0.0417
2 -8 7 -0.2197 0.0937
2 -7 0 0.4159 -0.0168
2 -7 1 0.5615 -0.0014
2 -7 2 0.6791 0.0235
2 -7 3 0.7404 0.0413
2 -7 4 0.7214 0.0370
2 -7 6 0.4737 -0.0337
2 -7 7 0.3179 -0.0700
2 -7 8 0.1888 -0.0883
2 -7 9 0.0982 -0.0870
2 -6 0 -1.0792 0.0019
2 -6 1 -1.2066 -0.0051
2 -6 2 -1.2348 -0.0129
2 -6 3 -1.1462 -0.0135
2 -6 4 -0.9592 -0.0039
2 -6 5 -0.7283 0.0120
2 -6 6 -0.5189 0.0265
2 -6 7 -0.3715 0.0349
2 -6 8 -0.2835 0.0384
2 -6 9 -0.2225 0.0412
2 -6 10 -0.1582 0.0450
2 -5 0 1.8674 0.0155
2 -5 1 1.8910 0.0149
2 -5 2 1.7772 0.0086
2 -5 3 1.5192 -0.0052
2 -5 4 1.1641 -0.0214
2 -5 5 0.8036 -0.0316
2 -5 6 0.5295 -0.0308
2 -5 7 0.3825 -0.0218
2 -5 8 0.3348 -0.0137
2 -5 9 0.3179 -0.0142
2 -5 10 0.2736 -0.0229
2 -5 11 0.1879 -0.0324
2 -4 0 -2.5538 -0.0108
2 -4 1 -2.3718 -0.0138
2 -4 2 -2.0758 -0.0107
2 -4 3 -1.6821 -0.0001
2 -4 4 -1.2421 0.0135
2 -4 5 -0.8367 0.0230
2 -4 6 -0.5398 0.0248
2 -4 7 -0.3784 0.0212
2 -4 8 -0.3203 0.0179
2 -4 9 -0.3015 0.0188
2 -4 10 -0.2676 0.0227
2 -4 11 -0.2011 0.0248
2 -3 0 2.6871 -0.0186
2 -3 1 2.2572 -0.0078
2 -3 2 1.7829 0.0031
2 -3 3 1.3221 0.0106
2 -3 4 0.9206 0.0130
2 -3 5 0.6110 0.0100
2 -3 6 0.4042 0.0021
2 -3 7 0.2838 -0.0095
2 -3 8 0.2159 -0.0219
2 -3 9 0.1692 -0.0305
2 -3 10 0.1287 -0.0313
2 -3 11 0.0939 -0.0235
2 -3 12 0.0669 -0.0109
2 -2 0 -1.7678 0.0334
2 -2 1 -1.1793 0.0257
2 -2 2 -0.6358 0.0112
2 -2 3 -0.2271 -0.0072
2 -2 4 0.0091 -0.0235
2 -2 5 0.0909 -0.0309
2 -2 6 0.0782 -0.0252
2 -2 7 0.0412 -0.0082
2 -2 8 0.0264 0.0126
2 -2 9 0.0381 0.0273
2 -2 10 0.0504 0.0295
2 -2 11 0.0384 0.0203
2 -2 12 0.0028 0.0063
2 -2 13 -0.0318 -0.0045
2 -1 0 -0.2708 -0.0094
2 -1 1 -0.8434 -0.0128
2 -1 2 -1.2600 -0.0098
2 -1 3 -1.4461 0.0004
2 -1 4 -1.3930 0.0135
2 -1 5 -1.1605 0.0226
2 -1 6 -0.8532 0.0220
2 -1 7 -0.5733 0.0117
2 -1 8 -0.3767 -0.0025
2 -1 9 -0.2582 -0.0130
2 -1 10 -0.1754 -0.0156
2 -1 11 -0.0924 -0.0117
2 -1 12 -0.0071 -0.0061
2 -1 13 0.0547 -0.0028
2 0 0 2.7200 -0.0147
2 0 1 3.1505 -0.0082
2 0 2 3.2926 -0.0031
2 0 3 3.1303 -0.0016
2 0 4 2.7133 -0.0031
2 0 5 2.1459 -0.0047
2 0 6 1.5547 -0.0040
2 0 7 1.0437 -0.0013
2 0 8 0.6609 0.0011
2 0 9 0.3945 0.0017
2 0 10 0.2035 0.0014
2 0 11 0.0561 0.0026
2 0 12 -0.0514 0.0070
2 0 13 -0.1058 0.0131
2 1 0 -4.4466 -0.0022
2 1 1 -4.7092 -0.0024
2 1 2 -4.5824 -0.0018
2 1 3 -4.1056 -0.0008
2 1 4 -3.3873 -0.0010
2 1 5 -2.5733 -0.0030
2 1 6 -1.8026 -0.0056
2 1 7 -1.1679 -0.0060
2 1 8 -0.6966 -0.0029
2 1 9 -0.3656 0.0020
2 1 10 -0.1353 0.0042
2 1 11 0.0200 0.0003
2 1 12 0.1066 -0.0088
2 1 13 0.1272 -0.0186
2 2 0 4.7521 0.0334
2 2 1 4.8519 0.0312
2 2 2 4.5622 0.0223
2 2 3 3.9449 0.0108
2 2 4 3.1299 0.0024
2 2 5 2.2732 -0.0002
2 2 6 1.5083 0.0015
2 2 7 0.9089 0.0029
2 2 8 0.4827 0.0014
2 2 9 0.1962 -0.0018
2 2 10 0.0114 -0.0023
2 2 11 -0.0928 0.0024
2 2 12 -0.1253 0.0106
2 2 13 -0.1012 0.0175
2 3 0 -3.8449 -0.0344
2 3 1 -3.7709 -0.0364
2 3 2 -3.4104 -0.0269
2 3 3 -2.8296 -0.0107
2 3 4 -2.1406 0.0037
2 3 5 -1.4663 0.0104
2 3 6 -0.9001 0.0094
2 3 7 -0.4807 0.0053
2 3 8 -0.1961 0.0023
2 3 9 -0.0121 0.0009
2 3 10 0.0977 -0.0008
2 3 11 0.1423 -0.0043
2 3 12 0.1269 -0.0079
2 3 13 0.0710 -0.0087
2 4 0 2.4678 0.0176
2 4 1 2.2381 0.0220
2 4 2 1.8599 0.0150
2 4 3 1.4068 0.0004
2 4 4 0.9614 -0.0135
2 4 5 0.5897 -0.0200
2 4 6 0.3200 -0.0182
2 4 7 0.1403 -0.0119
2 4 8 0.0174 -0.0055
2 4 9 -0.0744 -0.0009
2 4 10 -0.1368 0.0019
2 4 11 -0.1560 0.0027
2 4 12 -0.1260 0.0008
2 4 13 -0.0648 -0.0043
2 5 0 -1.2356 -0.0166
2 5 1 -0.9306 -0.0205
2 5 2 -0.5870 -0.0151
2 5 3 -0.2846 -0.0036
2 5 4 -0.0817 0.0072
2 5 5 0.0073 0.0130
2 5 6 0.0148 0.0134
2 5 7 -0.0013 0.0109
2 5 8 0.0072 0.0074
2 5 9 0.0512 0.0035
2 5 10 0.1040 0.0000
2 5 11 0.1276 -0.0011
2 5 12 0.1057 0.0023
2 5 13 0.0553 0.0094
2 6 0 0.3851 0.0198
2 6 1 0.1010 0.0246
2 6 2 -0.1582 0.0226
2 6 3 -0.3204 0.0180
2 6 4 -0.3483 0.0141
2 6 5 -0.2591 0.0108
2 6 6 -0.1180 0.0058
2 6 7 -0.0027 -0.0015
2 6 8 0.0389 -0.0081
2 6 9 0.0115 -0.0101
2 6 10 -0.0397 -0.0064
2 6 11 -0.0663 -0.0008
2 6 12 -0.0509 0.0018
2 7 0 0.0892 -0.0075
2 7 1 0.2893 -0.0100
2 7 2 0.4441 -0.0107
2 7 3 0.5031 -0.0144
2 7 4 0.4467 -0.0209
2 7 5 0.3024 -0.0243
2 7 6 0.1337 -0.0187
2 7 7 0.0068 -0.0044
2 7 8 -0.0455 0.0113
2 7 9 -0.0369 0.0197
2 7 10 -0.0099 0.0173
2 7 11 -0.0013 0.0075
2 7 12 -0.0190 -0.0027
2 8 0 -0.2953 0.0060
2 8 1 -0.3836 0.0014
2 8 2 -0.4377 -0.0011
2 8 3 -0.4335 0.0030
2 8 4 -0.3661 0.0111
2 8 5 -0.2570 0.0153
2 8 6 -0.1441 0.0095
2 8 7 -0.0600 -0.0051
2 8 8 -0.0144 -0.0205
2 8 9 0.0064 -0.0284
2 8 10 0.0227 -0.0258
2 9 0 0.3650 -0.0373
2 9 1 0.3558 -0.0347
2 9 2 0.3249 -0.0319
2 9 3 0.2738 -0.0296
2 9 4 0.2133 -0.0246
2 9 5 0.1586 -0.0134
2 9 6 0.1198 0.0037
2 9 7 0.0938 0.0206
2 9 8 0.0678 0.0303
2 9 9 0.0311 0.0301
2 10 0 -0.3571 0.0601
2 10 1 -0.3195 0.0769
2 10 2 -0.2485 0.0881
2 10 3 -0.1623 0.0872
2 10 4 -0.0886 0.0695
2 10 5 -0.0484 0.0376
2 10 6 -0.0424 0.0025
2 10 7 -0.0504 -0.0227
2 10 8 -0.0474 -0.0305
2 11 1 0.2629 -0.0671
2 11 2 0.2160 -0.0950
2 11 3 0.1325 -0.1044
2 11 4 0.0474 -0.0888
3 -10 0 -0.0248 -0.0359
3 -10 1 -0.0507 -0.0102
3 -10 2 -0.0788 0.0132
3 -10 3 -0.1025 0.0194
3 -9 0 -0.1435 0.0078
3 -9 1 -0.1106 -0.0085
3 -9 2 -0.0391 -0.0119
3 -9 3 0.0517 -0.0013
3 -9 4 0.1246 0.0128
3 -9 5 0.1489 0.0162
3 -8 0 0.2731 0.0105
3 -8 1 0.2211 0.0199
3 -8 2 0.0969 0.0101
3 -8 3 -0.0693 -0.0101
3 -8 4 -0.2114 -0.0213
3 -8 5 -0.2698 -0.0079
3 -8 6 -0.2323 0.0293
3 -8 7 -0.1396 0.0726
3 -7 0 -0.1956 -0.0148
3 -7 1 -0.1079 -0.0142
3 -7 2 0.0478 0.0021
3 -7 3 0.2399 0.0230
3 -7 4 0.3967 0.0289
3 -7 5 0.4526 0.0068
3 -7 6 0.3927 -0.0391
3 -7 7 0.2607 -0.0892
3 -7 8 0.1248 -0.1209
3 -6 0 -0.1982 0.0178
3 -6 1 -0.3309 0.0090
3 -6 2 -0.4721 -0.0076
3 -6 3 -0.5949 -0.0229
3 -6 4 -0.6559 -0.0245
3 -6 5 -0.6278 -0.0056
3 -6 6 -0.5215 0.0287
3 -6 7 -0.3787 0.0645
3 -6 8 -0.2440 0.0877
3 -6 9 -0.1411 0.0914
3 -6 10 -0.0715 0.0778
3 -5 0 0.9059 -0.0139
3 -5 1 1.0571 -0.0076
3 -5 2 1.1346 0.0002
3 -5 3 1.1112 0.0042
3 -5 4 0.9846 0.0002
3 -5 5 0.7911 -0.0113
3 -5 6 0.5921 -0.0253
3 -5 7 0.4381 -0.0355
3 -5 8 0.3401 -0.0387
3 -5 9 0.2716 -0.0355
3 -5 10 0.1996 -0.0284
3 -4 0 -1.8089 0.0001
3 -4 1 -1.8814 0.0005
3 -4 2 -1.8358 0.0026
3 -4 3 -1.6461 0.0091
3 -4 4 -1.3333 0.0191
3 -4 5 -0.9739 0.0283
3 -4 6 -0.6646 0.0311
3 -4 7 -0.4674 0.0250
3 -4 8 -0.3768 0.0125
3 -4 9 -0.3343 -0.0013
3 -4 10 -0.2788 -0.0122
3 -4 11 -0.1887 -0.0188
3 -3 0 2.6419 0.0023
3 -3 1 2.5062 0.0027
3 -3 2 2.2674 0.0019
3 -3 3 1.9250 -0.0023
3 -3 4 1.5064 -0.0099
3 -3 5 1.0790 -0.0178
3 -3 6 0.7233 -0.0213
3 -3 7 0.4879 -0.0176
3 -3 8 0.3640 -0.0069
3 -3 9 0.3003 0.0081
3 -3 10 0.2438 0.0237
3 -3 11 0.1725 0.0366
3 -3 12 0.0964 0.0443
3 -2 0 -2.9625 0.0145
3 -2 1 -2.5788 0.0101
3 -2 2 -2.1358 0.0023
3 -2 3 -1.6827 -0.0062
3 -2 4 -1.2556 -0.0115
3 -2 5 -0.8875 -0.0115
3 -2 6 -0.6030 -0.0069
3 -2 7 -0.4055 -0.0012
3 -2 8 -0.2766 0.0009
3 -2 9 -0.1903 -0.0042
3 -2 10 -0.1295 -0.0166
3 -2 11 -0.0894 -0.0324
3 -2 12 -0.0680 -0.0454
3 -1 0 2.3478 -0.0240
3 -1 1 1.8249 -0.0231
3 -1 2 1.2943 -0.0143
3 -1 3 0.8401 0.0006
3 -1 4 0.5067 0.0161
3 -1 5 0.2975 0.0255
3 -1 6 0.1831 0.0253
3 -1 7 0.1194 0.0176
3 -1 8 0.0711 0.0086
3 -1 9 0.0297 0.0051
3 -1 10 0.0092 0.0100
3 -1 11 0.0233 0.0208
3 -1 12 0.0623 0.0312
3 0 0 -0.8277 0.0145
3 0 1 -0.3214 0.0204
3 0 2 0.1154 0.0190
3 0 3 0.4098 0.0100
3 0 4 0.5349 -0.0029
3 0 5 0.5142 -0.0135
3 0 6 0.4089 -0.0176
3 0 7 0.2881 -0.0155
3 0 8 0.1946 -0.0110
3 0 9 0.1285 -0.0088
3 0 10 0.0627 -0.0104
3 0 11 -0.0216 -0.0136
3 0 12 -0.1100 -0.0153
3 0 13 -0.1633 -0.0140
3 1 0 -0.9371 -0.0104
3 1 1 -1.3516 -0.0166
3 1 2 -1.5930 -0.0190
3 1 3 -1.6297 -0.0169
3 1 4 -1.4785 -0.0116
3 1 5 -1.1995 -0.0059
3 1 6 -0.8768 -0.0014
3 1 7 -0.5852 0.0022
3 1 8 -0.3611 0.0060
3 1 9 -0.1949 0.0101
3 1 10 -0.0558 0.0125
3 1 11 0.0731 0.0106
3 1 12 0.1761 0.0039
3 1 13 0.2207 -0.0042
3 2 0 2.1193 0.0176
3 2 1 2.4329 0.0212
3 2 2 2.4993 0.0224
3 2 3 2.3183 0.0210
3 2 4 1.9457 0.0184
3 2 5 1.4756 0.0154
3 2 6 1.0097 0.0116
3 2 7 0.6215 0.0059
3 2 8 0.3349 -0.0019
3 2 9 0.1298 -0.0091
3 2 10 -0.0262 -0.0115
3 2 11 -0.1469 -0.0064
3 2 12 -0.2201 0.0043
3 2 13 -0.2280 0.0147
3 3 0 -2.3910 -0.0087
3 3 1 -2.5746 -0.0144
3 3 2 -2.5182 -0.0165
3 3 3 -2.2344 -0.0151
3 3 4 -1.7910 -0.0123
3 3 5 -1.2886 -0.0100
3 3 6 -0.8241 -0.0079
3 3 7 -0.4564 -0.0044
3 3 8 -0.1931 0.0011
3 3 9 -0.0081 0.0063
3 3 10 0.1256 0.0071
3 3 11 0.2125 0.0016
3 3 12 0.2406 -0.0080
3 3 13 0.2055 -0.0157
3 4 0 2.0283 -0.0140
3 4 1 2.0420 -0.0061
3 4 2 1.8871 -0.0021
3 4 3 1.5895 -0.0033
3 4 4 1.2119 -0.0063
3 4 5 0.8315 -0.0072
3 4 6 0.5090 -0.0047
3 4 7 0.2664 -0.0012
3 4 8 0.0880 0.0005
3 4 9 -0.0535 0.0001
3 4 10 -0.1679 -0.0003
3 4 11 -0.2396 0.0012
3 4 12 -0.2475 0.0037
3 4 13 -0.1925 0.0048
3 5 0 -1.4547 0.0115
3 5 1 -1.3243 0.0052
3 5 2 -1.1051 0.0041
3 5 3 -0.8426 0.0095
3 5 4 -0.5920 0.0165
3 5 5 -0.3961 0.0186
3 5 6 -0.2657 0.0135
3 5 7 -0.1763 0.0042
3 5 8 -0.0889 -0.0042
3 5 9 0.0187 -0.0082
3 5 10 0.1326 -0.0074
3 5 11 0.2132 -0.0031
3 5 12 0.2285 0.0032
3 5 13 0.1808 0.0098
3 6 0 0.8975 0.0131
3 6 1 0.7122 0.0198
3 6 2 0.4961 0.0186
3 6 3 0.3045 0.0097
3 6 4 0.1830 -0.0007
3 6 5 0.1446 -0.0061
3 6 6 0.1602 -0.0041
3 6 7 0.1746 0.0024
3 6 8 0.1401 0.0088
3 6 9 0.0483 0.0119
3 6 10 -0.0653 0.0106
3 6 11 -0.1476 0.0053
3 6 12 -0.1666 -0.0028
3 7 0 -0.4462 -0.0075
3 7 1 -0.2819 -0.0165
3 7 2 -0.1196 -0.0192
3 7 3 -0.0084 -0.0175
3 7 4 0.0194 -0.0158
3 7 5 -0.0293 -0.0163
3 7 6 -0.1086 -0.0174
3 7 7 -0.1586 -0.0162
3 7 8 -0.1421 -0.0120
3 7 9 -0.0675 -0.0068
3 7 10 0.0202 -0.0032
3 7 11 0.0732 -0.0020
3 8 0 0.1613 -0.0299
3 8 1 0.0494 -0.0278
3 8 2 -0.0556 -0.0243
3 8 3 -0.1160 -0.0155
3 8 4 -0.1106 -0.0005
3 8 5 -0.0512 0.0156
3 8 6 0.0222 0.0247
3 8 7 0.0657 0.0219
3 8 8 0.0607 0.0096
3 8 9 0.0236 -0.0042
3 8 10 -0.0098 -0.0117
3 9 0 -0.0250 0.0315
3 9 1 0.0252 0.0433
3 9 2 0.0819 0.0487
3 9 3 0.1195 0.0418
3 9 4 0.1228 0.0237
3 9 5 0.0977 0.0025
3 9 6 0.0648 -0.0110
3 9 7 0.0429 -0.0111
3 9 8 0.0347 -0.0004
3 9 9 0.0277 0.0129
3 10 0 -0.0519 0.0242
3 10 1 -0.0536 0.0130
3 10 2 -0.0642 0.0035
3 10 3 -0.0722 -0.0002
3 10 4 -0.0727 0.0014
3 10 5 -0.0694 0.0040
3 10 6 -0.0668 0.0032
3 10 7 -0.0636 -0.0021
4 -10 0 -0.1402 -0.0306
4 -10 1 -0.1585 -0.0311
4 -9 0 0.0622 -0.0055
4 -9 1 0.0724 -0.0041
4 -9 2 0.0620 -0.0118
4 -9 3 0.0478 -0.0167
4 -9 4 0.0391 -0.0111
4 -8 0 0.1675 0.0303
4 -8 1 0.1699 0.0457
4 -8 2 0.1440 0.0515
4 -8 3 0.0840 0.0432
4 -8 4 0.0148 0.0253
4 -8 5 -0.0258 0.0090
4 -8 6 -0.0184 0.0036
4 -7 0 -0.3922 -0.0172
4 -7 1 -0.3967 -0.0452
4 -7 2 -0.3198 -0.0557
4 -7 3 -0.1650 -0.0457
4 -7 4 0.0058 -0.0263
4 -7 5 0.1129 -0.0143
4 -7 6 0.1154 -0.0201
4 -7 7 0.0385 -0.0399
4 -7 8 -0.0507 -0.0595
4 -6 0 0.3895 0.0006
4 -6 1 0.3654 0.0184
4 -6 2 0.2574 0.0235
4 -6 3 0.0690 0.0131
4 -6 4 -0.1314 -0.0023
4 -6 5 -0.2551 -0.0070
4 -6 6 -0.2554 0.0076
4 -6 7 -0.1562 0.0359
4 -6 8 -0.0283 0.0625
4 -6 9 0.0618 0.0725
4 -5 0 -0.0486 -0.0064
4 -5 1 0.0445 -0.0061
4 -5 2 0.1571 0.0000
4 -5 3 0.2831 0.0129
4 -5 4 0.3815 0.0249
4 -5 5 0.4076 0.0263
4 -5 6 0.3502 0.0128
4 -5 7 0.2393 -0.0100
4 -5 8 0.1230 -0.0302
4 -5 9 0.0351 -0.0377
4 -5 10 -0.0168 -0.0302
4 -4 0 -0.5779 0.0097
4 -4 1 -0.7302 0.0059
4 -4 2 -0.8244 -0.0009
4 -4 3 -0.8380 -0.0092
4 -4 4 -0.7586 -0.0149
4 -4 5 -0.6040 -0.0144
4 -4 6 -0.4236 -0.0083
4 -4 7 -0.2721 -0.0018
4 -4 8 -0.1760 -0.0011
4 -4 9 -0.1219 -0.0086
4 -4 10 -0.0784 -0.0216
4 -4 11 -0.0276 -0.0340
4 -3 0 1.3632 0.0071
4 -3 1 1.4669 0.0039
4 -3 2 1.4859 0.0021
4 -3 3 1.3843 0.0002
4 -3 4 1.1563 -0.0038
4 -3 5 0.8492 -0.0092
4 -3 6 0.5481 -0.0119
4 -3 7 0.3282 -0.0064
4 -3 8 0.2110 0.0097
4 -3 9 0.1608 0.0335
4 -3 10 0.1228 0.0578
4 -3 11 0.0677 0.0740
4 -2 0 -2.1184 -0.0193
4 -2 1 -2.0414 -0.0137
4 -2 2 -1.8996 -0.0087
4 -2 3 -1.6760 -0.0036
4 -2 4 -1.3656 0.0033
4 -2 5 -1.0046 0.0110
4 -2 6 -0.6630 0.0152
4 -2 7 -0.4040 0.0101
4 -2 8 -0.2461 -0.0071
4 -2 9 -0.1609 -0.0338
4 -2 10 -0.1047 -0.0624
4 -2 11 -0.0526 -0.0835
4 -2 12 -0.0078 -0.0903
4 -1 0 2.5216 0.0100
4 -1 1 2.2439 0.0061
4 -1 2 1.9205 0.0048
4 -1 3 1.5788 0.0058
4 -1 4 1.2304 0.0059
4 -1 5 0.8942 0.0034
4 -1 6 0.6004 -0.0003
4 -1 7 0.3733 -0.0004
4 -1 8 0.2165 0.0076
4 -1 9 0.1152 0.0246
4 -1 10 0.0522 0.0465
4 -1 11 0.0186 0.0659
4 -1 12 0.0096 0.0755
4 0 0 -2.2519 0.0036
4 0 1 -1.8788 0.0084
4 0 2 -1.4720 0.0078
4 0 3 -1.0888 0.0023
4 0 4 -0.7602 -0.0042
4 0 5 -0.4996 -0.0077
4 0 6 -0.3073 -0.0070
4 0 7 -0.1721 -0.0050
4 0 8 -0.0784 -0.0064
4 0 9 -0.0178 -0.0142
4 0 10 0.0069 -0.0273
4 0 11 -0.0071 -0.0405
4 0 12 -0.0461 -0.0480
4 0 13 -0.0784 -0.0468
4 1 0 1.3379 -0.0101
4 1 1 0.9711 -0.0148
4 1 2 0.6122 -0.0146
4 1 3 0.3134 -0.0102
4 1 4 0.1025 -0.0049
4 1 5 -0.0174 -0.0017
4 1 6 -0.0664 -0.0019
4 1 7 -0.0777 -0.0032
4 1 8 -0.0770 -0.0023
4 1 9 -0.0677 0.0032
4 1 10 -0.0346 0.0118
4 1 11 0.0306 0.0196
4 1 12 0.1088 0.0226
4 1 13 0.1573 0.0201
4 2 0 -0.2433 0.0130
4 2 1 0.0941 0.0143
4 2 2 0.3514 0.0133
4 2 3 0.4945 0.0113
4 2 4 0.5180 0.0099
4 2 5 0.4458 0.0102
4 2 6 0.3247 0.0116
4 2 7 0.2056 0.0123
4 2 8 0.1178 0.0101
4 2 9 0.0558 0.0050
4 2 10 -0.0070 -0.0006
4 2 11 -0.0860 -0.0032
4 2 12 -0.1644 -0.0013
4 2 13 -0.2032 0.0032
4 3 0 -0.5379 -0.0002
4 3 1 -0.8328 -0.0021
4 3 2 -0.9972 -0.0040
4 3 3 -1.0052 -0.0059
4 3 4 -0.8706 -0.0079
4 3 5 -0.6434 -0.0101
4 3 6 -0.3946 -0.0116
4 3 7 -0.1872 -0.0115
4 3 8 -0.0488 -0.0094
4 3 9 0.0347 -0.0067
4 3 10 0.0965 -0.0062
4 3 11 0.1555 -0.0098
4 3 12 0.2001 -0.0165
4 3 13 0.2039 -0.0221
4 4 0 0.8814 -0.0347
4 4 1 1.0731 -0.0271
4 4 2 1.1387 -0.0175
4 4 3 1.0609 -0.0091
4 4 4 0.8619 -0.0030
4 4 5 0.5984 0.0010
4 4 6 0.3399 0.0039
4 4 7 0.1377 0.0057
4 4 8 0.0042 0.0064
4 4 9 -0.0820 0.0073
4 4 10 -0.1482 0.0101
4 4 11 -0.2001 0.0160
4 4 12 -0.2209 0.0232
4 5 0 -0.9443 0.0531
4 5 1 -0.9899 0.0439
4 5 2 -0.9451 0.0325
4 5 3 -0.8144 0.0240
4 5 4 -0.6285 0.0189
4 5 5 -0.4345 0.0144
4 5 6 -0.2734 0.0075
4 5 7 -0.1585 -0.0012
4 5 8 -0.0724 -0.0092
4 5 9 0.0130 -0.0141
4 5 10 0.1071 -0.0157
4 5 11 0.1884 -0.0156
4 5 12 0.2223 -0.0150
4 6 0 0.8470 -0.0231
4 6 1 0.7910 -0.0176
4 6 2 0.6776 -0.0143
4 6 3 0.5336 -0.0173
4 6 4 0.3982 -0.0231
4 6 5 0.3044 -0.0243
4 6 6 0.2595 -0.0163
4 6 7 0.2375 -0.0009
4 6 8 0.1956 0.0148
4 6 9 0.1062 0.0236
4 6 10 -0.0189 0.0229
4 6 11 -0.1339 0.0146
4 6 12 -0.1912 0.0037
4 7 0 -0.6223 -0.0071
4 7 1 -0.5491 -0.0123
4 7 2 -0.4420 -0.0096
4 7 3 -0.3334 0.0021
4 7 4 -0.2602 0.0157
4 7 5 -0.2409 0.0216
4 7 6 -0.2612 0.0153
4 7 7 -0.2782 -0.0001
4 7 8 -0.2476 -0.0159
4 7 9 -0.1551 -0.0243
4 7 10 -0.0288 -0.0225
4 7 11 0.0790 -0.0129
4 8 0 0.3588 -0.0263
4 8 1 0.3098 -0.0213
4 8 2 0.2424 -0.0220
4 8 3 0.1821 -0.0268
4 8 4 0.1545 -0.0291
4 8 5 0.1659 -0.0238
4 8 6 0.1954 -0.0113
4 8 7 0.2060 0.0027
4 8 8 0.1710 0.0115
4 8 9 0.0943 0.0126
4 8 10 0.0093 0.0083
4 9 0 -0.1762 0.0881
4 9 1 -0.1503 0.0948
4 9 2 -0.1069 0.0973
4 9 3 -0.0661 0.0912
4 9 4 -0.0463 0.0730
4 9 5 -0.0501 0.0455
4 9 6 -0.0613 0.0177
4 9 7 -0.0583 -0.0006
4 9 8 -0.0324 -0.0048
4 10 0 0.0861 -0.0880
4 10 1 0.0799 -0.1093
4 10 2 0.0490 -0.1216
4 10 3 0.0111 -0.1174
4 10 4 -0.0178 -0.0947
4 10 5 -0.0322 -0.0603
4 10 6 -0.0381 -0.0266
5 -9 0 0.0891 0.0721
5 -9 1 0.1165 0.1192
5 -9 2 0.0861 0.1187
5 -9 3 0.0317 0.0831
5 -8 0 0.0325 -0.0074
5 -8 1 0.0306 -0.0387
5 -8 2 0.0663 -0.0429
5 -8 3 0.1052 -0.0270
5 -8 4 0.1181 -0.0071
5 -8 5 0.1021 0.0039
5 -7 0 -0.2876 -0.0136
5 -7 1 -0.3218 -0.0280
5 -7 2 -0.3303 -0.0435
5 -7 3 -0.2866 -0.0512
5 -7 4 -0.2009 -0.0458
5 -7 5 -0.1158 -0.0303
5 -7 7 -0.0742 -0.0038
5 -6 0 0.4854 -0.0167
5 -6 1 0.5487 0.0242
5 -6 2 0.5291 0.0564
5 -6 3 0.4005 0.0653
5 -6 4 0.2081 0.0500
5 -6 5 0.0413 0.0241
5 -6 6 -0.0289 0.0051
5 -6 8 0.0784 0.0124
5 -5 0 -0.4360 0.0319
5 -5 1 -0.4818 0.0048
5 -5 2 -0.4544 -0.0170
5 -5 3 -0.3200 -0.0187
5 -5 4 -0.1216 -0.0015
5 -5 5 0.0489 0.0198
5 -5 6 0.1169 0.0281
5 -5 7 0.0757 0.0171
5 -5 8 -0.0191 -0.0047
5 -5 9 -0.0968 -0.0216
5 -4 0 0.1337 -0.0117
5 -4 1 0.0958 -0.0082
5 -4 2 0.0542 -0.0075
5 -4 3 -0.0180 -0.0173
5 -4 4 -0.1029 -0.0345
5 -4 5 -0.1555 -0.0475
5 -4 6 -0.1455 -0.0463
5 -4 7 -0.0835 -0.0309
5 -4 8 -0.0088 -0.0111
5 -4 9 0.0429 0.0003
5 -4 10 0.0618 -0.0023
5 -3 0 0.3031 0.0021
5 -3 1 0.4263 0.0028
5 -3 2 0.4985 0.0069
5 -3 3 0.5149 0.0157
5 -3 4 0.4661 0.0251
5 -3 5 0.3555 0.0286
5 -3 6 0.2137 0.0241
5 -3 7 0.0886 0.0164
5 -3 8 0.0149 0.0138
5 -3 9 -0.0078 0.0218
5 -3 10 -0.0082 0.0378
5 -3 11 -0.0133 0.0527
5 -2 0 -0.8091 -0.0200
5 -2 1 -0.9150 -0.0137
5 -2 2 -0.9757 -0.0092
5 -2 3 -0.9579 -0.0067
5 -2 4 -0.8357 -0.0031
5 -2 5 -0.6226 0.0035
5 -2 6 -0.3784 0.0099
5 -2 7 -0.1777 0.0094
5 -2 8 -0.0630 -0.0037
5 -2 9 -0.0230 -0.0287
5 -2 10 -0.0134 -0.0570
5 -2 11 0.0014 -0.0766
5 -1 0 1.3434 0.0302
5 -1 1 1.3212 0.0220
5 -1 2 1.2810 0.0139
5 -1 3 1.1951 0.0065
5 -1 4 1.0285 -0.0020
5 -1 5 0.7825 -0.0118
5 -1 6 0.5075 -0.0191
5 -1 7 0.2731 -0.0173
5 -1 8 0.1207 -0.0024
5 -1 9 0.0438 0.0234
5 -1 10 0.0065 0.0516
5 -1 11 -0.0198 0.0711
5 -1 12 -0.0392 0.0744
5 0 0 -1.7240 -0.0162
5 0 1 -1.5692 -0.0104
5 0 2 -1.3931 -0.0061
5 0 3 -1.1973 -0.0037
5 0 4 -0.9656 -0.0005
5 0 5 -0.7009 0.0046
5 0 6 -0.4382 0.0099
5 0 7 -0.2234 0.0106
5 0 8 -0.0809 0.0029
5 0 9 -0.0039 -0.0130
5 0 10 0.0312 -0.0320
5 0 11 0.0429 -0.0465
5 0 12 0.0394 -0.0506
5 1 0 1.7003 -0.0002
5 1 1 1.4867 -0.0033
5 1 2 1.2344 -0.0027
5 1 3 0.9648 0.0001
5 1 4 0.6885 0.0015
5 1 5 0.4247 -0.0010
5 1 6 0.2023 -0.0065
5 1 7 0.0439 -0.0112
5 1 8 -0.0476 -0.0107
5 1 9 -0.0850 -0.0033
5 1 10 -0.0831 0.0088
5 1 11 -0.0534 0.0201
5 1 12 -0.0099 0.0253
5 2 0 -1.2491 0.0064
5 2 1 -1.0185 0.0029
5 2 2 -0.7650 -0.0035
5 2 3 -0.5138 -0.0091
5 2 4 -0.2864 -0.0096
5 2 5 -0.1048 -0.0036
5 2 6 0.0172 0.0074
5 2 7 0.0831 0.0186
5 2 8 0.1098 0.0246
5 2 9 0.1106 0.0227
5 2 10 0.0862 0.0139
5 2 11 0.0344 0.0033
5 2 12 -0.0318 -0.0040
5 3 0 0.6394 -0.0043
5 3 1 0.3888 0.0054
5 3 2 0.1621 0.0163
5 3 3 -0.0115 0.0235
5 3 4 -0.1123 0.0232
5 3 5 -0.1367 0.0148
5 3 6 -0.1044 0.0005
5 3 7 -0.0539 -0.0153
5 3 8 -0.0199 -0.0274
5 3 9 -0.0100 -0.0325
5 3 10 -0.0036 -0.0306
5 3 11 0.0226 -0.0249
5 3 12 0.0674 -0.0191
5 4 0 -0.1409 -0.0125
5 4 1 0.0966 -0.0178
5 4 2 0.2789 -0.0236
5 4 3 0.3696 -0.0271
5 4 4 0.3531 -0.0268
5 4 5 0.2456 -0.0217
5 4 6 0.0961 -0.0120
5 4 7 -0.0334 0.0011
5 4 8 -0.1018 0.0149
5 4 9 -0.1101 0.0266
5 4 10 -0.0930 0.0345
5 4 11 -0.0849 0.0385
5 4 12 -0.0922 0.0390
5 5 0 -0.1882 0.0333
5 5 1 -0.3391 0.0278
5 5 2 -0.4354 0.0223
5 5 3 -0.4498 0.0190
5 5 4 -0.3760 0.0184
5 5 5 -0.2387 0.0186
5 5 6 -0.0876 0.0158
5 5 7 0.0270 0.0080
5 5 8 0.0828 -0.0040
5 5 9 0.0940 -0.0172
5 5 10 0.0926 -0.0286
5 5 11 0.0976 -0.0364
5 6 0 0.3840 -0.0188
5 6 1 0.4241 -0.0101
5 6 2 0.4199 -0.0031
5 6 3 0.3697 -0.0028
5 6 4 0.2860 -0.0088
5 6 5 0.1958 -0.0156
5 6 6 0.1281 -0.0163
5 6 7 0.0948 -0.0084
5 6 8 0.0813 0.0049
5 6 9 0.0587 0.0172
5 6 10 0.0101 0.0239
5 6 11 -0.0520 0.0243
5 7 0 -0.4266 -0.0312
5 7 1 -0.4138 -0.0353
5 7 2 -0.3617 -0.0314
5 7 3 -0.2873 -0.0164
5 7 4 -0.2188 0.0046
5 7 5 -0.1835 0.0206
5 7 6 -0.1904 0.0226
5 7 7 -0.2195 0.0102
5 7 8 -0.2311 -0.0083
5 7 9 -0.1920 -0.0217
5 7 10 -0.1022 -0.0234
5 8 0 0.3140 0.0464
5 8 1 0.3119 0.0479
5 8 2 0.2772 0.0361
5 8 3 0.2261 0.0113
5 8 4 0.1855 -0.0166
5 8 5 0.1772 -0.0343
5 8 6 0.2014 -0.0335
5 8 7 0.2320 -0.0170
5 8 8 0.2325 0.0041
5 8 9 0.1824 0.0175
5 9 0 -0.1510 0.0132
5 9 1 -0.1683 0.0152
5 9 2 -0.1636 0.0265
5 9 3 -0.1436 0.0439
5 9 4 -0.1243 0.0576
5 9 5 -0.1181 0.0586
5 9 6 -0.1235 0.0448
5 9 7 -0.1252 0.0231
6 -9 0 0.0588 0.1610
6 -8 0 -0.0428 -0.1112
6 -8 1 -0.0751 -0.1937
6 -8 2 -0.0392 -0.2119
6 -8 3 0.0294 -0.1673
6 -8 4 0.0767 -0.0897
6 -7 0 -0.1102 0.0301
6 -7 1 -0.1105 0.0789
6 -7 2 -0.1450 0.0894
6 -7 3 -0.1803 0.0633
6 -7 4 -0.1804 0.0216
6 -7 5 -0.1371 -0.0116
6 -7 6 -0.0739 -0.0237
6 -6 0 0.3251 -0.0147
6 -6 1 0.3791 -0.0020
6 -6 2 0.3976 0.0210
6 -6 3 0.3497 0.0426
6 -6 4 0.2386 0.0502
6 -6 5 0.1085 0.0397
6 -6 6 0.0157 0.0193
6 -6 7 -0.0119 0.0018
6 -5 0 -0.4142 0.0409
6 -5 1 -0.5220 0.0014
6 -5 2 -0.5523 -0.0382
6 -5 3 -0.4592 -0.0575
6 -5 4 -0.2664 -0.0481
6 -5 5 -0.0592 -0.0194
6 -5 6 0.0711 0.0081
6 -5 7 0.0886 0.0180
6 -5 8 0.0292 0.0085
6 -4 0 0.2858 -0.0333
6 -4 1 0.3913 -0.0108
6 -4 2 0.4509 0.0113
6 -4 3 0.3983 0.0150
6 -4 4 0.2405 -0.0030
6 -4 5 0.0549 -0.0289
6 -4 6 -0.0688 -0.0430
6 -4 7 -0.0919 -0.0344
6 -4 9 0.0127 0.0146
6 -3 0 -0.0467 -0.0006
6 -3 1 -0.0695 -0.0036
6 -3 2 -0.1125 -0.0037
6 -3 3 -0.1169 0.0074
6 -3 4 -0.0695 0.0271
6 -3 5 -0.0053 0.0431
6 -3 6 0.0310 0.0434
6 -3 7 0.0262 0.0266
6 -3 8 0.0033 0.0037
6 -3 9 -0.0073 -0.0107
6 -3 10 0.0040 -0.0087
6 -2 0 -0.1717 0.0059
6 -2 1 -0.2430 0.0085
6 -2 2 -0.2713 0.0067
6 -2 3 -0.2750 -0.0015
6 -2 4 -0.2534 -0.0111
6 -2 5 -0.1966 -0.0143
6 -2 6 -0.1112 -0.0076
6 -2 7 -0.0287 0.0040
6 -2 8 0.0152 0.0102
6 -2 9 0.0103 0.0038
6 -2 10 -0.0206 -0.0133
6 -2 11 -0.0445 -0.0311
6 -1 0 0.3964 0.0119
6 -1 1 0.4784 0.0054
6 -1 2 0.5511 0.0008
6 -1 3 0.5935 -0.0011
6 -1 4 0.5681 -0.0040
6 -1 5 0.4569 -0.0107
6 -1 6 0.2889 -0.0197
6 -1 7 0.1283 -0.0244
6 -1 8 0.0302 -0.0179
6 -1 9 0.0040 0.0007
6 -1 10 0.0162 0.0243
6 -1 11 0.0266 0.0415
6 0 0 -0.6991 -0.0094
6 0 1 -0.7095 -0.0049
6 0 2 -0.7374 -0.0014
6 0 3 -0.7524 0.0008
6 0 4 -0.7001 0.0039
6 0 5 -0.5547 0.0095
6 0 6 -0.3497 0.0154
6 0 7 -0.1567 0.0168
6 0 8 -0.0337 0.0099
6 0 9 0.0117 -0.0045
6 0 10 0.0140 -0.0205
6 0 11 0.0114 -0.0306
6 1 0 0.9811 -0.0098
6 1 1 0.9182 -0.0125
6 1 2 0.8532 -0.0115
6 1 3 0.7661 -0.0077
6 1 4 0.6206 -0.0040
6 1 5 0.4111 -0.0030
6 1 6 0.1821 -0.0044
6 1 7 -0.0002 -0.0054
6 1 8 -0.0947 -0.0033
6 1 9 -0.1087 0.0021
6 1 10 -0.0821 0.0086
6 1 11 -0.0521 0.0127
6 2 0 -1.0402 0.0131
6 2 1 -0.9406 0.0133
6 2 2 -0.8077 0.0086
6 2 3 -0.6324 0.0020
6 2 4 -0.4077 -0.0021
6 2 5 -0.1587 -0.0009
6 2 6 0.0599 0.0049
6 2 7 0.1969 0.0121
6 2 8 0.2374 0.0165
6 2 9 0.2058 0.0157
6 2 10 0.1423 0.0102
6 2 11 0.0770 0.0030
6 3 0 0.8320 -0.0046
6 3 1 0.7004 0.0048
6 3 2 0.5388 0.0173
6 3 3 0.3491 0.0268
6 3 4 0.1455 0.0275
6 3 5 -0.0372 0.0176
6 3 6 -0.1602 -0.0003
6 3 7 -0.2078 -0.0203
6 3 8 -0.1961 -0.0354
6 3 9 -0.1560 -0.0404
6 3 10 -0.1084 -0.0345
6 3 11 -0.0581 -0.0216
6 4 0 -0.5156 0.0075
6 4 1 -0.3503 -0.0092
6 4 2 -0.1813 -0.0294
6 4 3 -0.0297 -0.0447
6 4 4 0.0779 -0.0488
6 4 5 0.1180 -0.0395
6 4 6 0.0910 -0.0187
6 4 7 0.0294 0.0081
6 4 8 -0.0210 0.0330
6 4 9 -0.0333 0.0487
6 4 10 -0.0171 0.0514
6 4 11 -0.0029 0.0426
6 5 0 0.2434 -0.0218
6 5 1 0.0905 -0.0134
6 5 2 -0.0519 0.0022
6 5 3 -0.1499 0.0189
6 5 4 -0.1717 0.0317
6 5 5 -0.1079 0.0363
6 5 6 0.0118 0.0298
6 5 7 0.1279 0.0124
6 5 8 0.1854 -0.0112
6 5 9 0.1686 -0.0336
6 5 10 0.1075 -0.0479
6 5 11 0.0488 -0.0509
6 6 0 -0.0416 0.0451
6 6 1 0.0383 0.0522
6 6 2 0.1088 0.0490
6 6 3 0.1462 0.0357
6 6 4 0.1293 0.0154
6 6 5 0.0580 -0.0054
6 6 6 -0.0375 -0.0181
6 6 7 -0.1121 -0.0172
6 6 9 -0.1082 0.0150
6 6 10 -0.0634 0.0308
6 7 0 -0.0942 -0.0878
6 7 1 -0.1019 -0.0997
6 7 2 -0.0968 -0.0987
6 7 3 -0.0796 -0.0818
6 7 4 -0.0522 -0.0522
6 7 5 -0.0239 -0.0201
6 7 6 -0.0100 0.0025
6 7 7 -0.0198 0.0090
6 7 8 -0.0454 0.0017
6 7 9 -0.0637 -0.0105
6 8 0 0.1327 0.1285
6 8 1 0.1228 0.1348
6 8 2 0.0922 0.1241
6 8 3 0.0542 0.0950
6 8 4 0.0267 0.0545
6 8 5 0.0266 0.0169
6 8 6 0.0597 -0.0047
6 8 7 0.1124 -0.0065
6 9 0 -0.0772 -0.1146
6 9 1 -0.0864 -0.1163
6 9 2 -0.0756 -0.0990
6 9 3 -0.0527 -0.0645
6 9 4 -0.0331 -0.0236
6 9 5 -0.0326 0.0081
7 -8 0 -0.1019 -0.1585
7 -8 1 -0.1366 -0.2317
7 -7 0 0.0517 0.0928
7 -7 1 0.0786 0.1852
7 -7 2 0.0462 0.2157
7 -7 3 -0.0231 0.1772
7 -7 4 -0.0782 0.0967
7 -6 0 0.1099 -0.0230
7 -6 1 0.1113 -0.0709
7 -6 2 0.1264 -0.0831
7 -6 3 0.1409 -0.0583
7 -6 4 0.1279 -0.0171
7 -6 5 0.0782 0.0147
7 -6 6 0.0125 0.0234
7 -5 0 -0.2751 0.0198
7 -5 1 -0.3369 0.0100
7 -5 2 -0.3497 -0.0122
7 -5 3 -0.2936 -0.0346
7 -5 4 -0.1729 -0.0424
7 -5 5 -0.0286 -0.0302
7 -5 6 0.0796 -0.0068
7 -5 7 0.1131 0.0117
7 -4 0 0.2913 -0.0281
7 -4 1 0.4212 -0.0018
7 -4 2 0.4854 0.0277
7 -4 3 0.4326 0.0417
7 -4 4 0.2664 0.0304
7 -4 5 0.0564 0.0020
7 -4 6 -0.1028 -0.0233
7 -4 7 -0.1550 -0.0282
7 -4 8 -0.1143 -0.0108
7 -3 0 -0.1458 -0.0024
7 -3 1 -0.2869 -0.0144
7 -3 2 -0.4104 -0.0247
7 -3 3 -0.4324 -0.0194
7 -3 4 -0.3278 0.0032
7 -3 5 -0.1514 0.0296
7 -3 6 0.0051 0.0408
7 -3 7 0.0802 0.0274
7 -3 8 0.0782 -0.0030
7 -3 9 0.0482 -0.0313
7 -2 0 -0.0153 0.0287
7 -2 1 0.0565 0.0332
7 -2 2 0.1627 0.0313
7 -2 3 0.2240 0.0175
7 -2 4 0.2035 -0.0038
7 -2 5 0.1280 -0.0201
7 -2 6 0.0529 -0.0198
7 -2 7 0.0117 -0.0024
7 -2 8 -0.0035 0.0205
7 -2 9 -0.0201 0.0337
7 -2 10 -0.0499 0.0295
7 -1 0 0.0924 -0.0131
7 -1 1 0.1059 -0.0198
7 -1 2 0.0912 -0.0217
7 -1 3 0.0866 -0.0168
7 -1 4 0.0969 -0.0097
7 -1 5 0.0970 -0.0077
7 -1 6 0.0673 -0.0145
7 -1 7 0.0204 -0.0257
7 -1 8 -0.0092 -0.0319
7 -1 9 0.0014 -0.0263
7 -1 10 0.0410 -0.0101
7 0 0 -0.1570 -0.0031
7 0 1 -0.1956 0.0001
7 0 2 -0.2527 0.0030
7 0 3 -0.3232 0.0042
7 0 4 -0.3648 0.0059
7 0 5 -0.3340 0.0108
7 0 6 -0.2309 0.0183
7 0 7 -0.1055 0.0240
7 0 8 -0.0194 0.0228
7 0 9 0.0012 0.0132
7 0 10 -0.0216 -0.0004
7 1 0 0.3025 -0.0141
7 1 1 0.3111 -0.0130
7 1 2 0.3585 -0.0106
7 1 3 0.4181 -0.0063
7 1 4 0.4275 -0.0019
7 1 5 0.3447 0.0005
7 1 6 0.1904 0.0007
7 1 7 0.0359 0.0001
7 1 8 -0.0522 0.0003
7 1 9 -0.0589 0.0014
7 1 10 -0.0215 0.0021
7 2 0 -0.4651 0.0263
7 2 1 -0.4425 0.0300
7 2 2 -0.4331 0.0284
7 2 3 -0.4046 0.0218
7 2 4 -0.3092 0.0125
7 2 5 -0.1374 0.0037
7 2 6 0.0596 -0.0026
7 2 7 0.2020 -0.0055
7 2 8 0.2393 -0.0052
7 2 9 0.1837 -0.0022
7 2 10 0.0925 0.0021
7 3 0 0.5028 -0.0027
7 3 1 0.4634 -0.0084
7 3 2 0.4071 -0.0100
7 3 3 0.3041 -0.0089
7 3 4 0.1336 -0.0080
7 3 5 -0.0790 -0.0091
7 3 6 -0.2659 -0.0126
7 3 7 -0.3597 -0.0174
7 3 8 -0.3396 -0.0211
7 3 10 -0.1248 -0.0183
7 4 0 -0.3957 -0.0166
7 4 1 -0.3332 -0.0220
7 4 2 -0.2506 -0.0287
7 4 3 -0.1329 -0.0313
7 4 4 0.0155 -0.0258
7 4 5 0.1578 -0.0113
7 4 6 0.2446 0.0094
7 4 7 0.2505 0.0309
7 4 8 0.1924 0.0469
7 4 9 0.1135 0.0518
7 4 10 0.0499 0.0436
7 5 0 0.2536 -0.0117
7 5 1 0.1709 0.0026
7 5 2 0.0759 0.0217
7 5 3 -0.0214 0.0372
7 5 4 -0.0963 0.0423
7 5 5 -0.1179 0.0343
7 5 6 -0.0746 0.0143
7 5 7 0.0085 -0.0129
7 5 8 0.0816 -0.0393
7 5 9 0.1057 -0.0560
7 6 0 -0.1563 0.0695
7 6 1 -0.0906 0.0650
7 6 2 -0.0117 0.0472
7 6 3 0.0574 0.0229
7 6 4 0.0827 -0.0010
7 6 5 0.0405 -0.0178
7 6 6 -0.0577 -0.0217
7 6 7 -0.1638 -0.0110
7 6 8 -0.2213 0.0101
7 6 9 -0.2041 0.0322
7 7 0 0.0901 -0.1190
7 7 1 0.0745 -0.1310
7 7 2 0.0436 -0.1251
7 7 3 0.0101 -0.1021
7 7 4 -0.0019 -0.0668
7 7 5 0.0239 -0.0285
7 7 6 0.0779 0.0008
7 7 7 0.1280 0.0127
7 8 0 -0.0316 0.1482
7 8 1 -0.0531 0.1640
7 8 2 -0.0686 0.1622
7 8 3 -0.0716 0.1399
7 8 4 -0.0655 0.1007
7 8 5 -0.0555 0.0555
8 -7 0 0.1182 0.1017
8 -6 0 -0.0580 -0.0468
8 -6 1 -0.0786 -0.1233
8 -6 2 -0.0615 -0.1533
8 -6 3 -0.0072 -0.1273
8 -5 0 -0.0952 0.0157
8 -5 1 -0.0903 0.0478
8 -5 2 -0.0768 0.0534
8 -5 3 -0.0660 0.0326
8 -5 4 -0.0484 0.0039
8 -5 5 -0.0159 -0.0114
8 -4 0 0.2355 -0.0242
8 -4 1 0.2845 -0.0175
8 -4 2 0.2807 0.0011
8 -4 3 0.2215 0.0197
8 -4 4 0.1142 0.0240
8 -4 5 -0.0092 0.0095
8 -4 6 -0.0987 -0.0138
8 -4 7 -0.1181 -0.0289
8 -3 0 -0.2429 0.0096
8 -3 1 -0.3590 -0.0015
8 -3 2 -0.4298 -0.0160
8 -3 3 -0.4089 -0.0202
8 -3 4 -0.2851 -0.0069
8 -3 5 -0.1060 0.0170
8 -3 6 0.0460 0.0342
8 -3 7 0.1094 0.0308
8 -3 8 0.0840 0.0072
8 -2 0 0.1235 0.0269
8 -2 1 0.2612 0.0325
8 -2 2 0.4039 0.0338
8 -2 3 0.4663 0.0223
8 -2 4 0.4049 -0.0008
8 -2 5 0.2536 -0.0234
8 -2 6 0.0962 -0.0302
8 -2 7 0.0019 -0.0150
8 -2 8 -0.0192 0.0137
8 -1 0 -0.0027 -0.0221
8 -1 1 -0.0976 -0.0319
8 -1 2 -0.2278 -0.0352
8 -1 3 -0.3085 -0.0278
8 -1 4 -0.2948 -0.0133
8 -1 5 -0.2108 -0.0019
8 -1 6 -0.1196 -0.0024
8 -1 7 -0.0656 -0.0148
8 -1 8 -0.0467 -0.0300
8 -1 9 -0.0319 -0.0364
8 0 0 -0.0402 -0.0188
8 0 1 -0.0028 -0.0101
8 0 2 0.0439 -0.0007
8 0 3 0.0497 0.0057
8 0 4 0.0103 0.0096
8 0 5 -0.0339 0.0144
8 0 6 -0.0407 0.0221
8 0 7 -0.0070 0.0298
8 0 8 0.0323 0.0322
8 0 9 0.0402 0.0257
8 1 0 0.0564 0.0273
8 1 1 0.0408 0.0302
8 1 2 0.0635 0.0269
8 1 3 0.1344 0.0204
8 1 4 0.2104 0.0125
8 1 5 0.2314 0.0040
8 1 6 0.1743 -0.0040
8 1 7 0.0740 -0.0098
8 1 8 -0.0073 -0.0117
8 1 9 -0.0319 -0.0102
8 2 0 -0.1154 -0.0007
8 2 1 -0.0944 -0.0048
8 2 2 -0.1265 -0.0061
8 2 3 -0.1933 -0.0069
8 2 4 -0.2321 -0.0087
8 2 5 -0.1917 -0.0115
8 2 6 -0.0809 -0.0142
8 2 7 0.0370 -0.0150
8 2 8 0.0955 -0.0120
8 2 9 0.0773 -0.0045
8 3 0 0.1856 0.0072
8 3 1 0.1650 -0.0031
8 3 2 0.1757 -0.0128
8 3 3 0.1823 -0.0184
8 3 4 0.1314 -0.0184
8 3 5 0.0068 -0.0130
8 3 6 -0.1452 -0.0050
8 3 7 -0.2465 0.0019
8 3 8 -0.2466 0.0038
8 3 9 -0.1597 -0.0002
8 4 0 -0.1921 -0.0547
8 4 1 -0.1791 -0.0394
8 4 2 -0.1733 -0.0207
8 4 3 -0.1361 -0.0019
8 4 4 -0.0355 0.0146
8 4 5 0.1138 0.0266
8 4 6 0.2503 0.0335
8 4 7 0.3078 0.0356
8 4 8 0.2644 0.0343
8 5 0 0.1380 0.0676
8 5 1 0.1224 0.0671
8 5 2 0.1045 0.0607
8 5 3 0.0607 0.0466
8 5 4 -0.0168 0.0253
8 5 5 -0.1026 -0.0002
8 5 6 -0.1532 -0.0254
8 5 7 -0.1425 -0.0458
8 5 8 -0.0833 -0.0572
8 6 0 -0.0925 -0.0090
8 6 1 -0.0702 -0.0199
8 6 2 -0.0391 -0.0322
8 6 3 0.0010 -0.0394
8 6 4 0.0360 -0.0376
8 6 5 0.0408 -0.0260
8 6 6 0.0012 -0.0065
8 7 1 0.0710 -0.0646
8 7 2 0.0401 -0.0508
8 7 3 0.0019 -0.0302
8 7 4 -0.0193 -0.0083
9 -5 0 0.0386 0.0267
9 -5 1 0.0619 0.0727
9 -5 2 0.0699 0.0873
9 -4 0 0.0818 -0.0367
9 -4 1 0.0581 -0.0491
9 -4 2 0.0148 -0.0403
9 -4 3 -0.0182 -0.0152
9 -4 4 -0.0354 0.0082
9 -3 0 -0.1949 0.0431
9 -3 1 -0.2070 0.0405
9 -3 2 -0.1794 0.0239
9 -3 3 -0.1221 0.0043
9 -3 4 -0.0422 -0.0045
9 -2 0 0.2009 -0.0082
9 -2 1 0.2686 -0.0085
9 -2 2 0.3185 -0.0037
9 -2 3 0.3144 -0.0028
9 -2 4 0.2357 -0.0109
9 -2 5 0.1076 -0.0236
9 -2 6 -0.0079 -0.0300
9 -1 0 -0.0973 -0.0146
9 -1 1 -0.1974 -0.0196
9 -1 2 -0.3196 -0.0213
9 -1 3 -0.3894 -0.0146
9 -1 4 -0.3586 -0.0005
9 -1 5 -0.2459 0.0126
9 -1 6 -0.1207 0.0153
9 -1 7 -0.0460 0.0043
9 0 0 -0.0140 -0.0262
9 0 1 0.0792 -0.0124
9 0 2 0.2025 0.0014
9 0 3 0.2776 0.0096
9 0 4 0.2634 0.0118
9 0 5 0.1850 0.0119
9 0 6 0.1059 0.0143
9 0 7 0.0710 0.0192
9 1 0 0.0506 0.0768
9 1 1 -0.0217 0.0720
9 1 2 -0.0877 0.0559
9 1 3 -0.0941 0.0346
9 1 4 -0.0398 0.0137
9 1 5 0.0257 -0.0036
9 1 6 0.0484 -0.0156
9 1 7 0.0155 -0.0208
9 2 0 -0.0365 -0.0682
9 2 1 0.0241 -0.0789
9 2 2 0.0353 -0.0745
9 2 3 -0.0224 -0.0597
9 2 4 -0.1097 -0.0411
9 2 5 -0.1612 -0.0242
9 2 6 -0.1406 -0.0124
9 2 7 -0.0681 -0.0059
9 3 0 0.0378 0.0384
9 3 1 -0.0121 0.0432
9 3 2 -0.0004 0.0388
9 3 3 0.0625 0.0297
9 3 4 0.1205 0.0213
9 3 5 0.1204 0.0175
9 3 6 0.0587 0.0183
9 3 7 -0.0170 0.0201
9 4 0 -0.0609 -0.0614
9 4 1 -0.0343 -0.0464
9 4 2 -0.0532 -0.0241
9 4 3 -0.0868 -0.0016
9 4 4 -0.0838 0.0145
9 4 5 -0.0207 0.0201
9 4 6 0.0727 0.0159
9 5 0 0.0652 0.1106
9 5 1 0.0639 0.0943
9 5 2 0.0876 0.0653
9 5 3 0.1014 0.0301
9 5 4 0.0698 -0.0035
10 -2 0 0.1183 -0.0504
10 -2 1 0.0909 -0.0549
10 -2 2 0.0473 -0.0431
10 -1 0 -0.1034 0.0068
10 -1 1 -0.1174 0.0140
10 -1 2 -0.1403 0.0156
10 -1 3 -0.1452 0.0155
10 0 0 0.0095 -0.0070
10 0 1 0.0654 -0.0010
10 0 2 0.1532 0.0042
10 0 3 0.2147 0.0054
10 0 4 0.2069 0.0022
10 1 0 0.0704 0.0660
10 1 1 -0.0072 0.0534
10 1 2 -0.1078 0.0337
10 1 3 -0.1683 0.0133
10 1 4 -0.1569 -0.0030
10 2 0 -0.0627 -0.1013
10 2 1 0.0172 -0.1038
10 2 2 0.0829 -0.0883
10 2 3 0.0887 -0.0612
0 0 0 0.0 0.0
;
_shelx_fab_checksum                16489
_olex2_submission_special_instructions  'No special instructions were received'
_oxdiff_exptl_absorpt_empirical_details
;
Empirical correction (ABSPACK) includes:
- Absorption correction using spherical harmonics
- Frame scaling
;
_oxdiff_exptl_absorpt_empirical_full_max  1.422
_oxdiff_exptl_absorpt_empirical_full_min  0.684
loop_
[truncated: 61 more chars]
